# Supplementary material
Source: publisher figshare collection journal article supplement (https://acs.figshare.com/ndownloader/files/4161244)

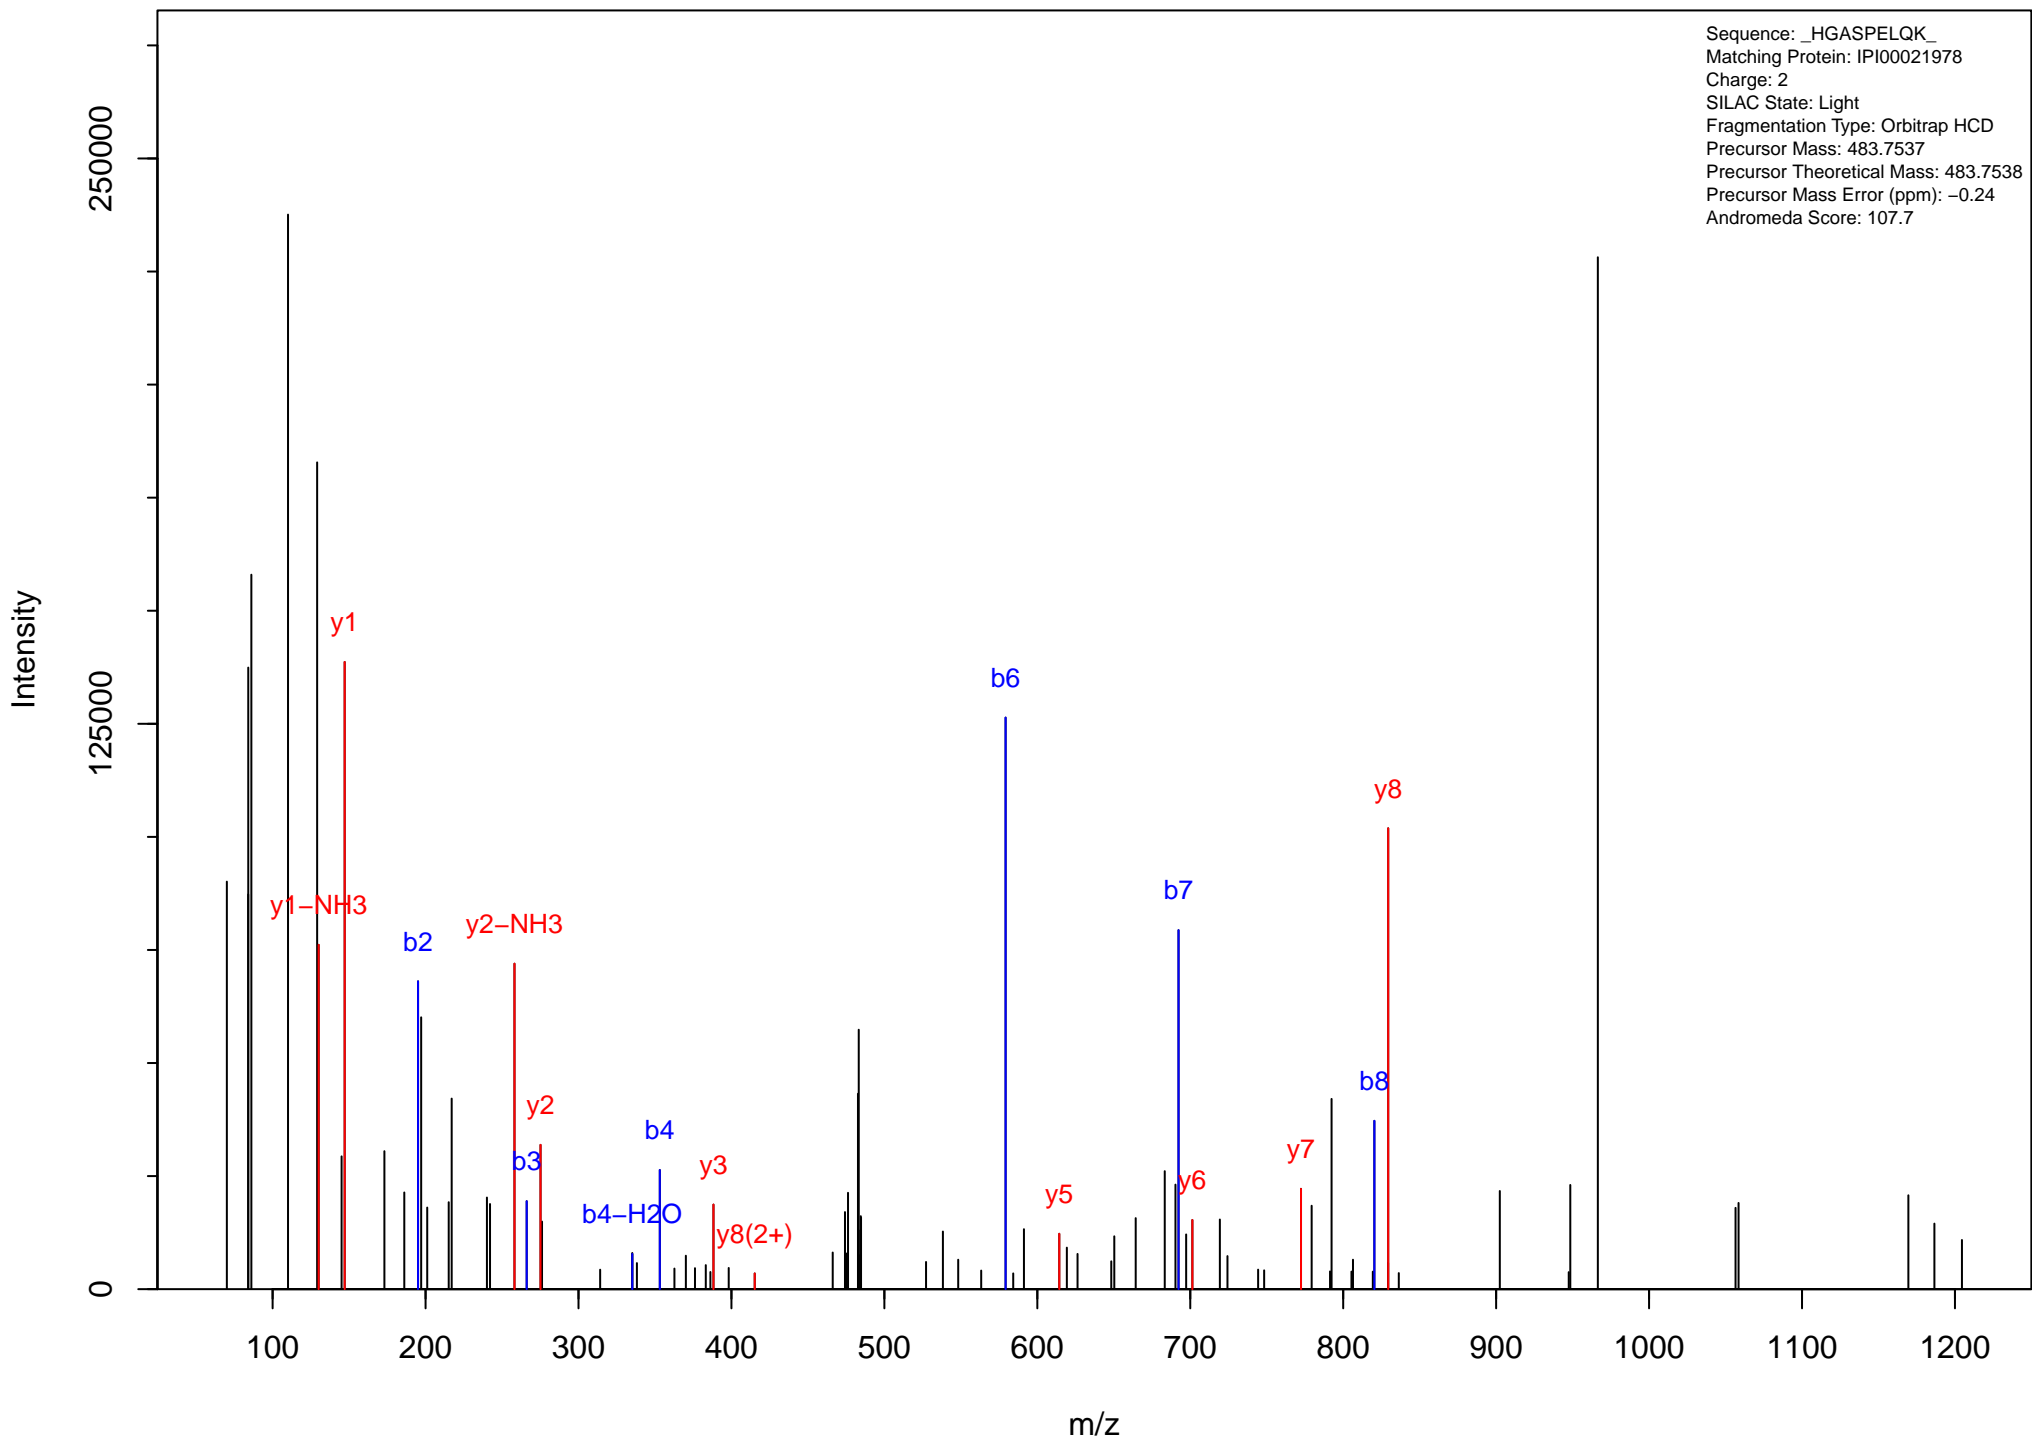

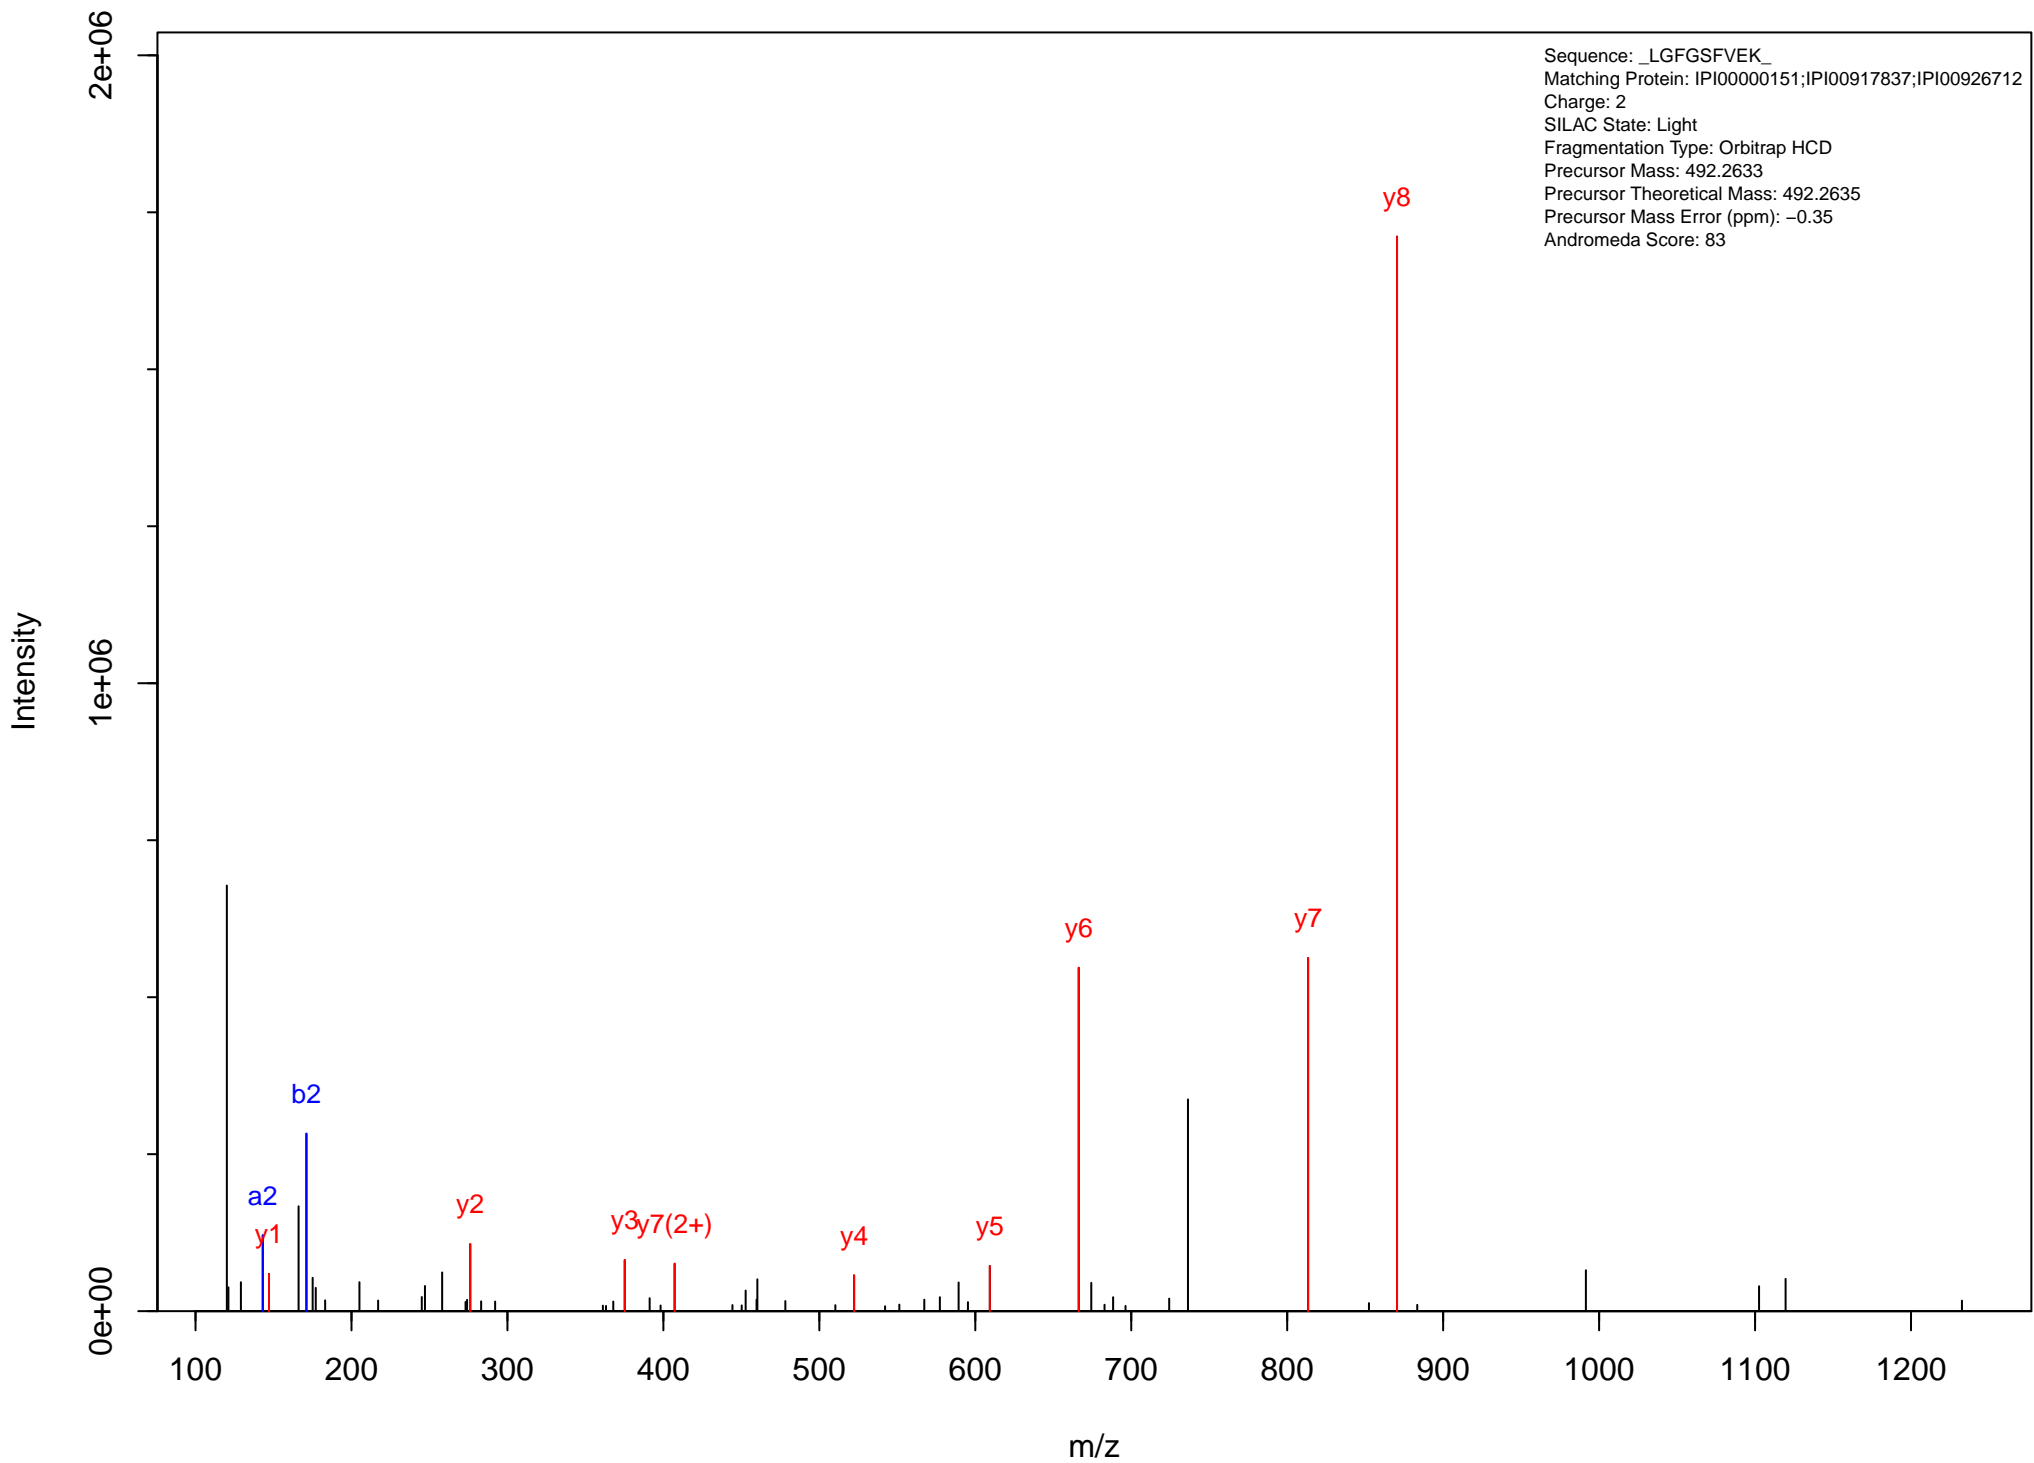

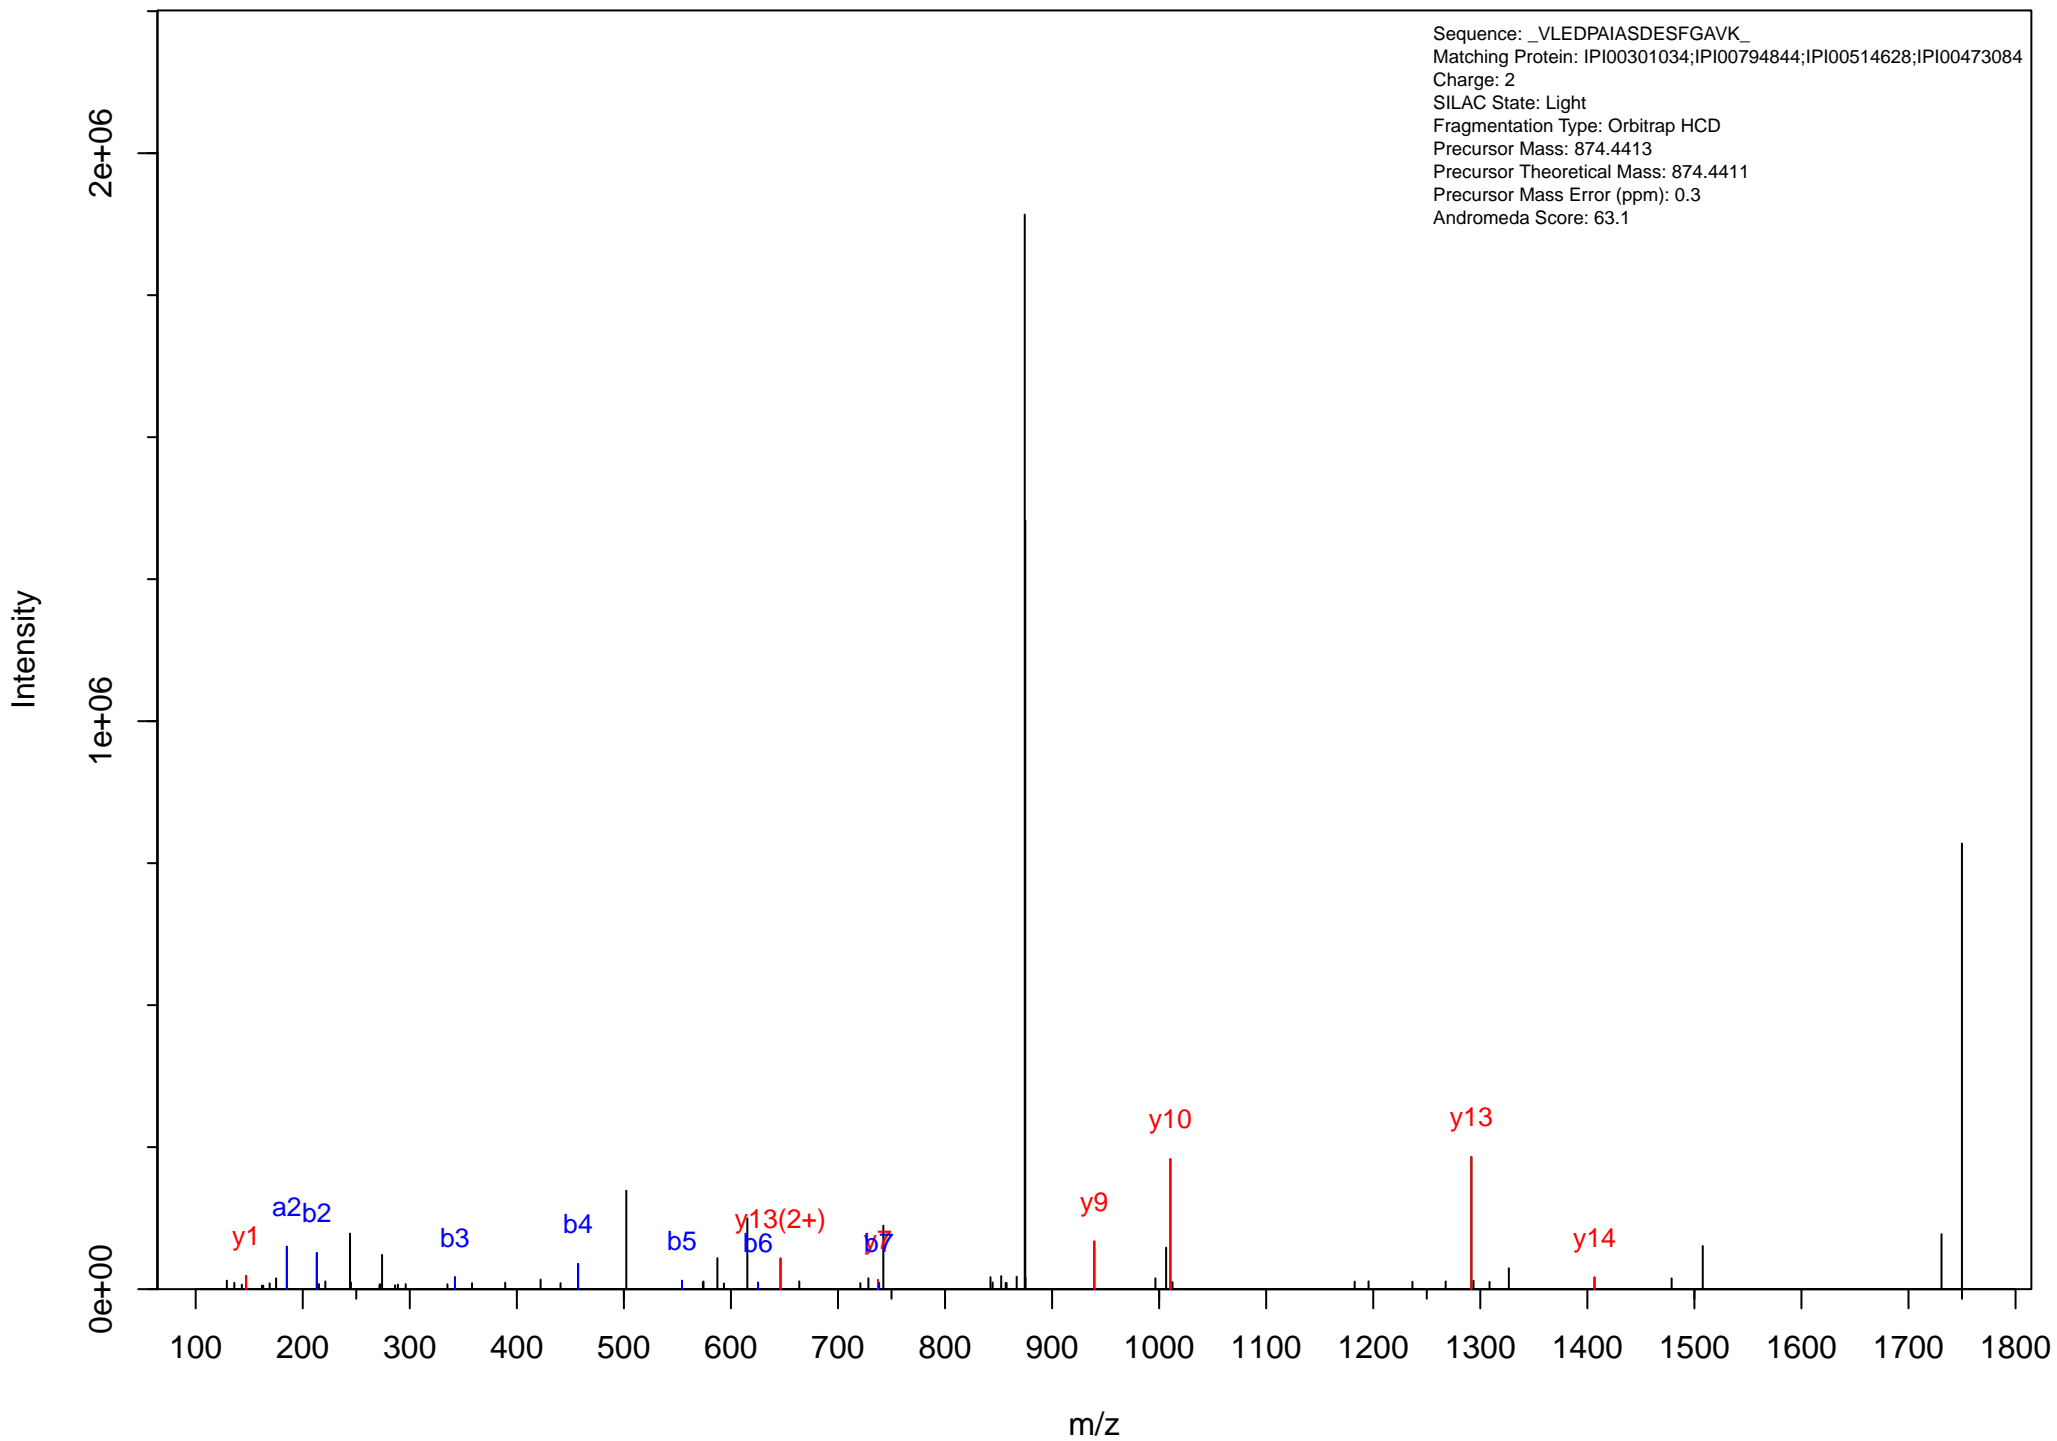

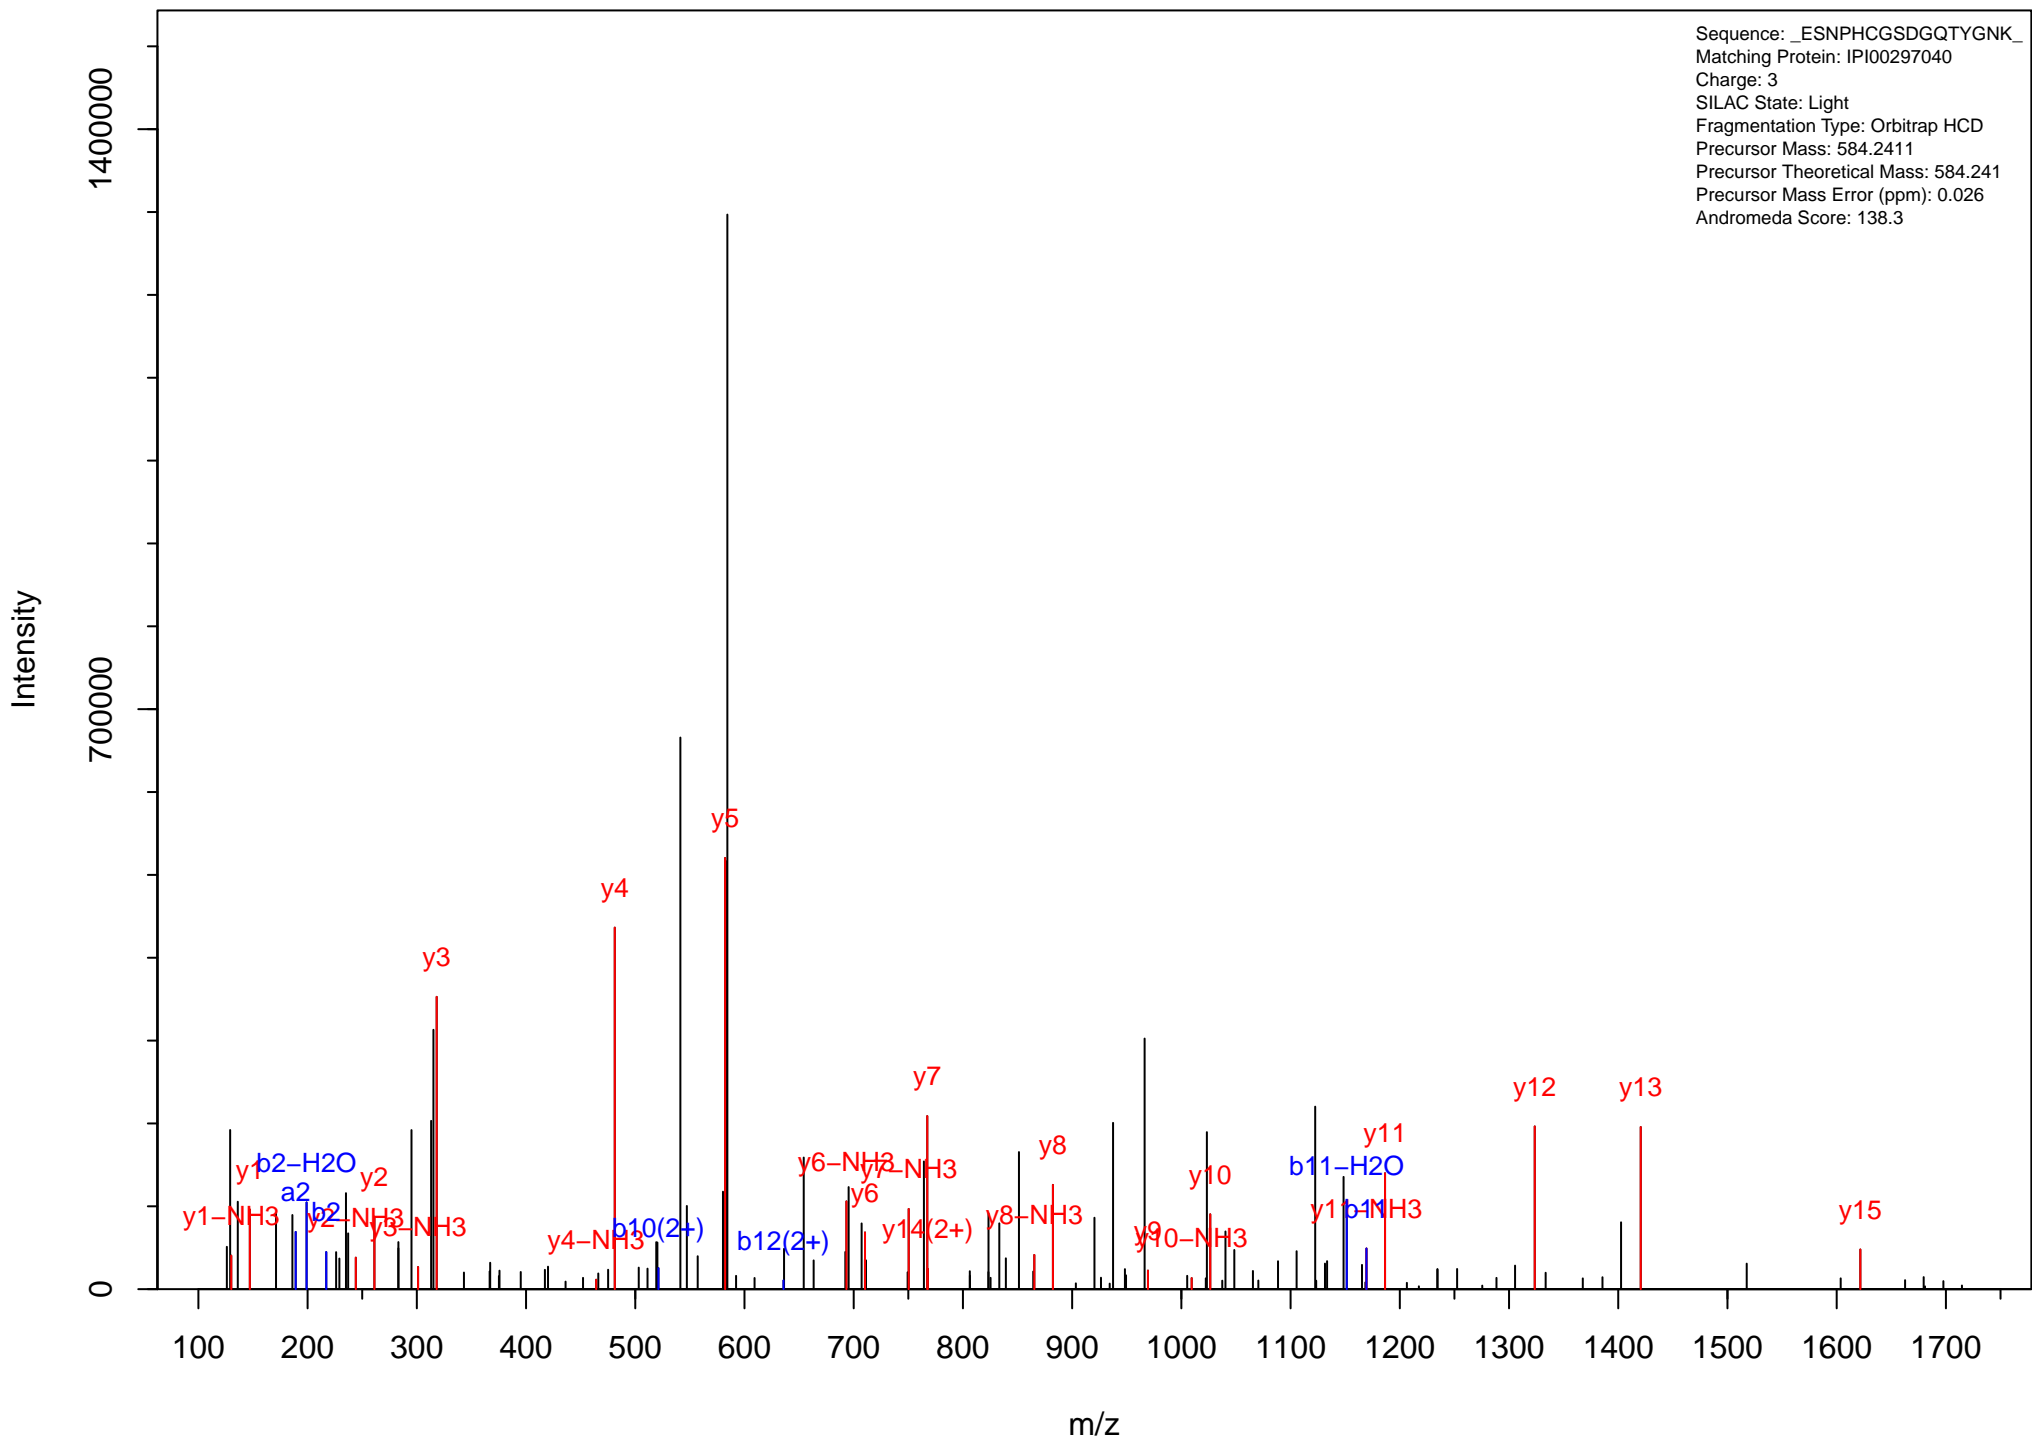

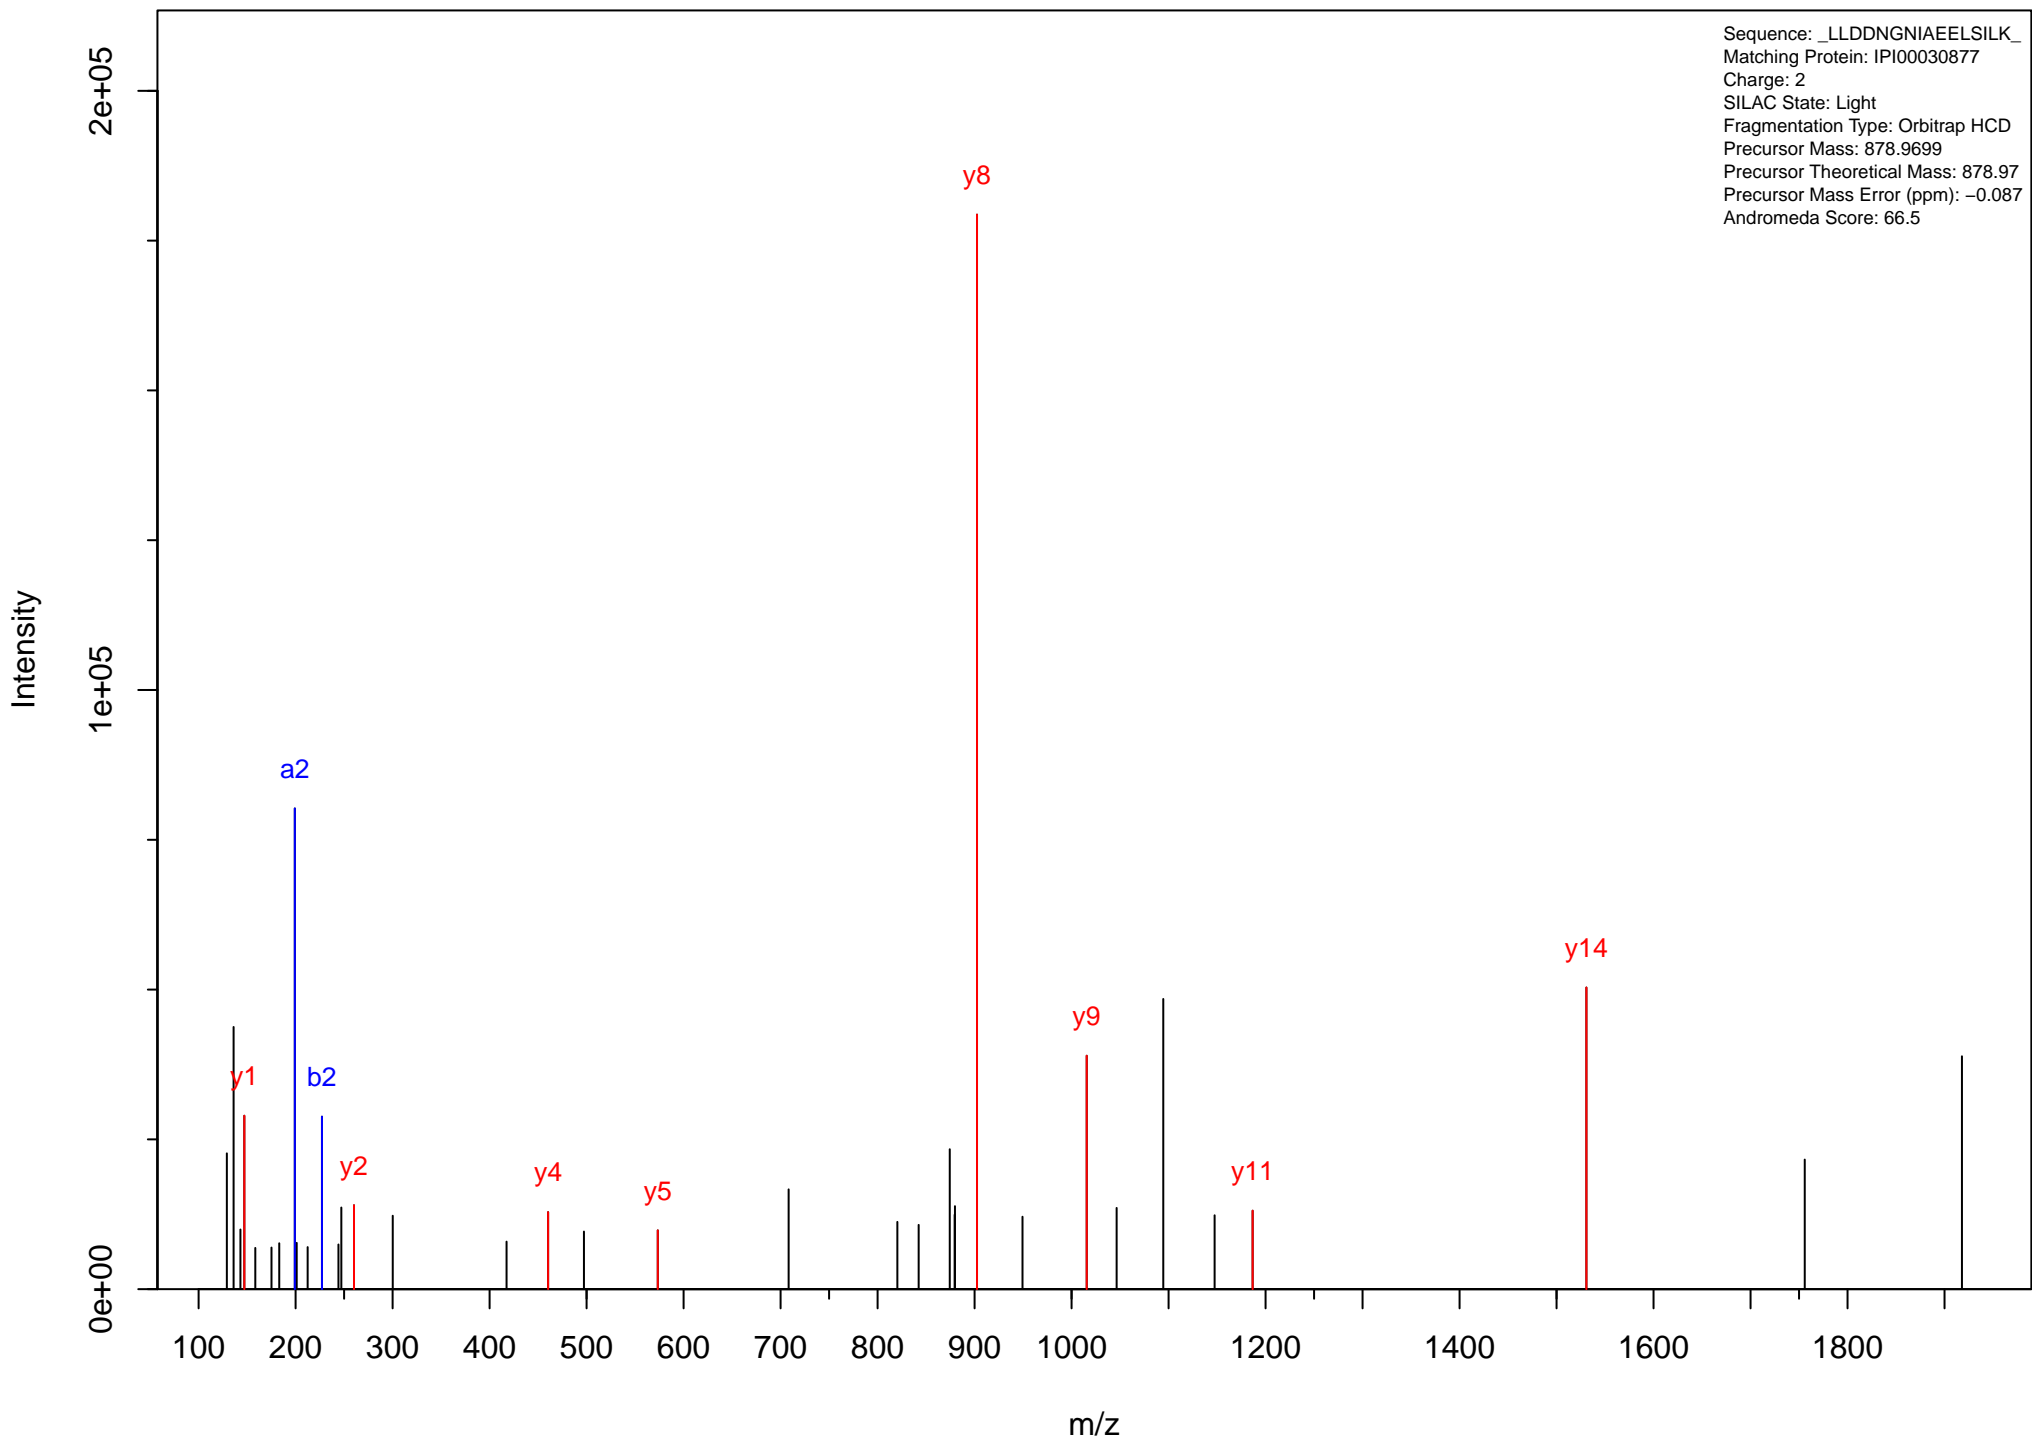

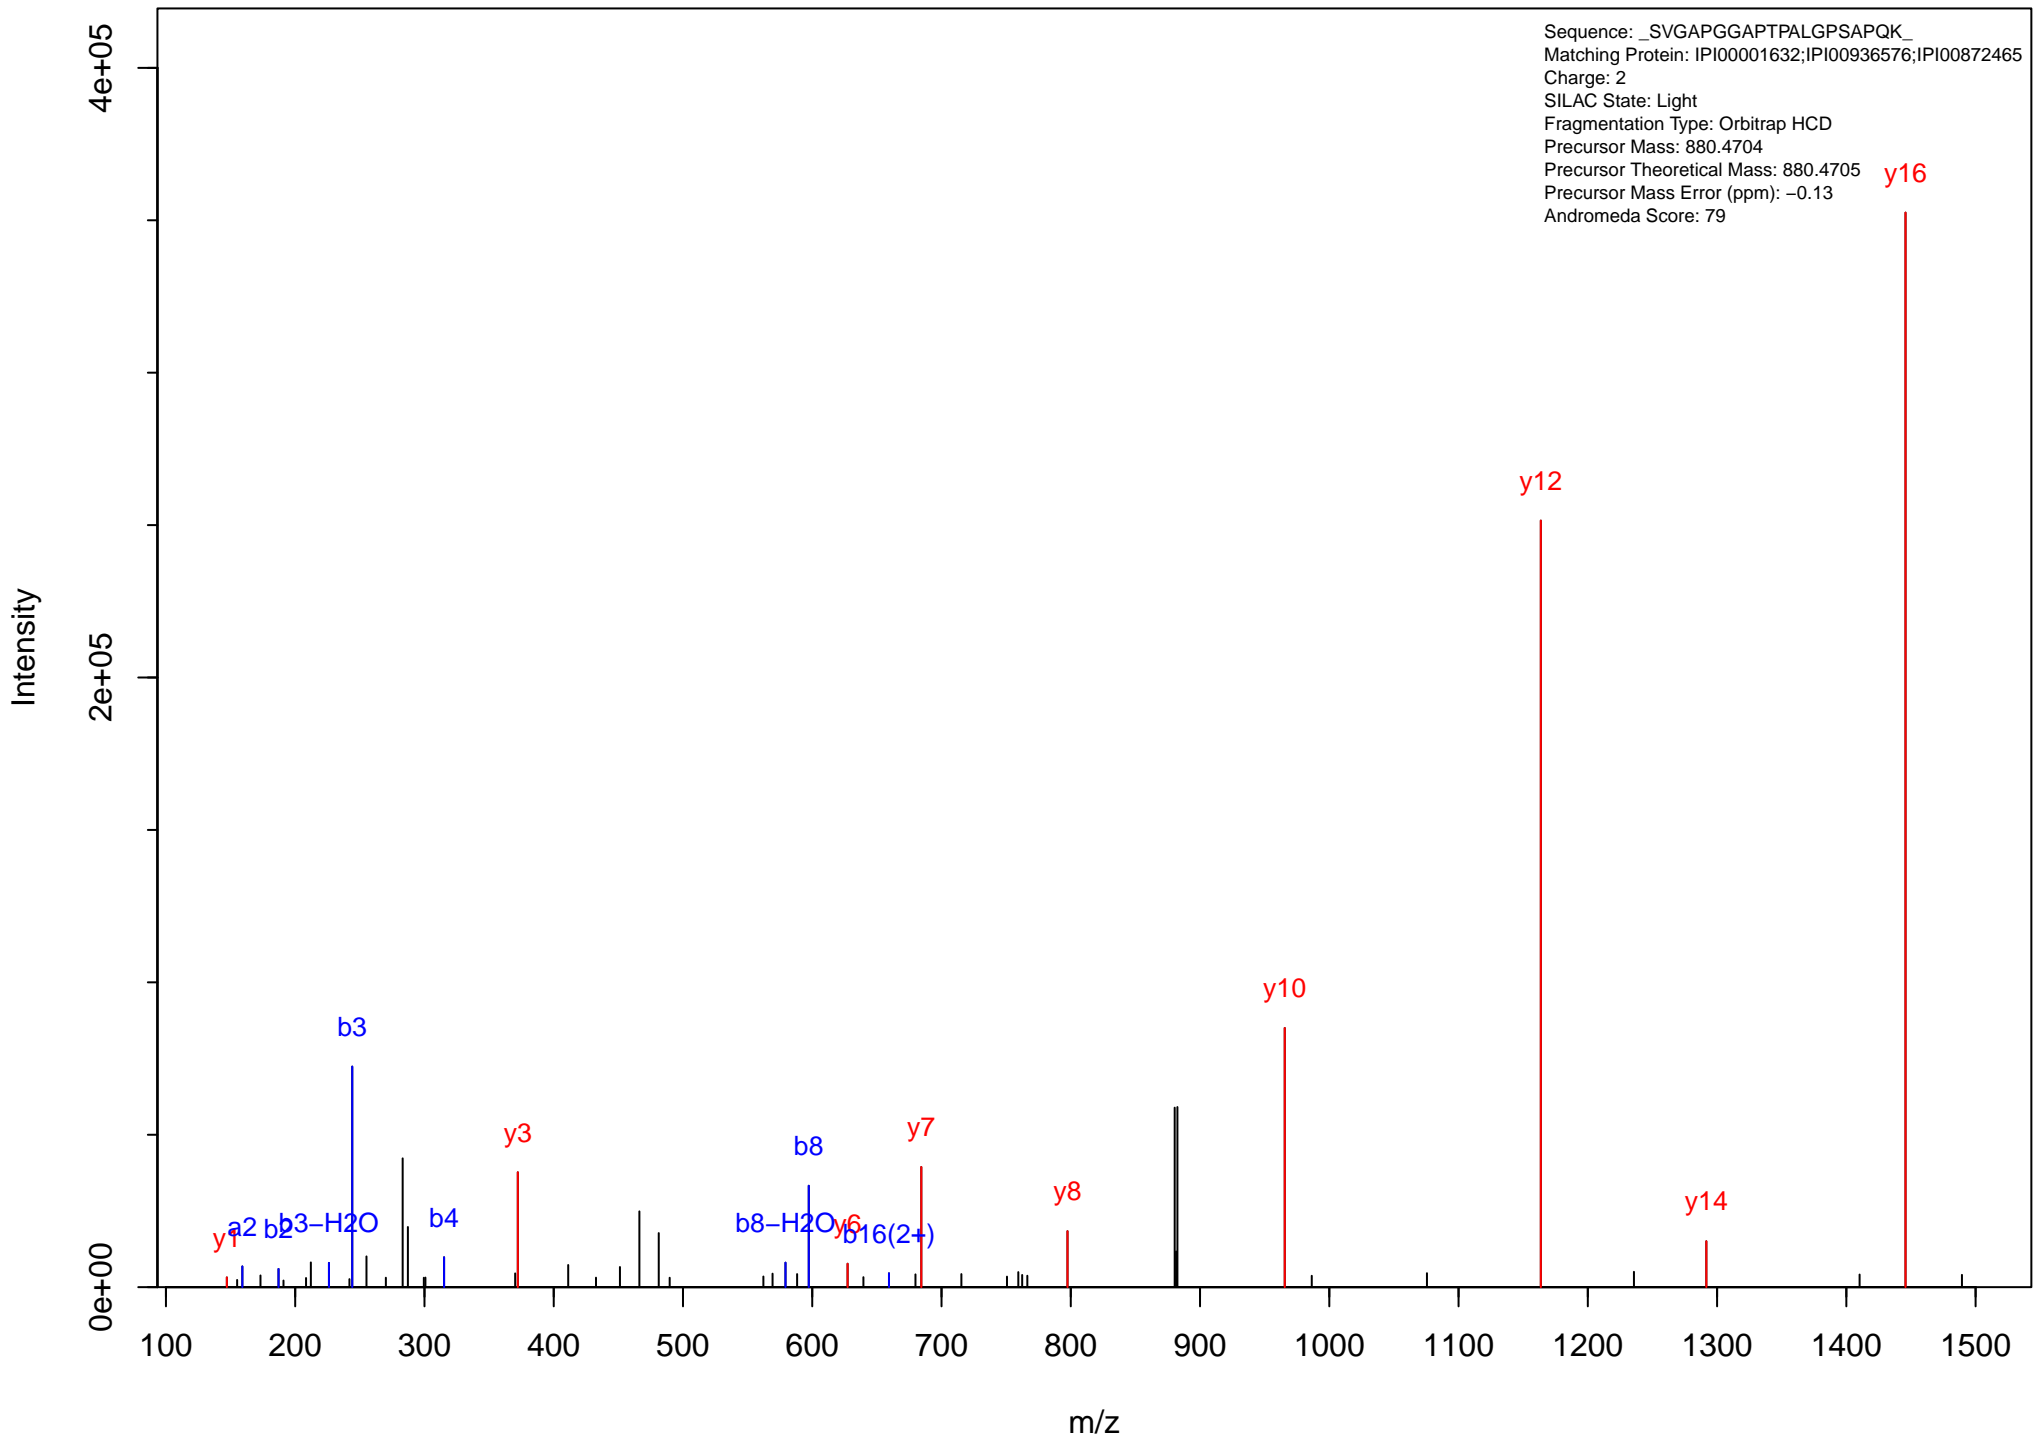

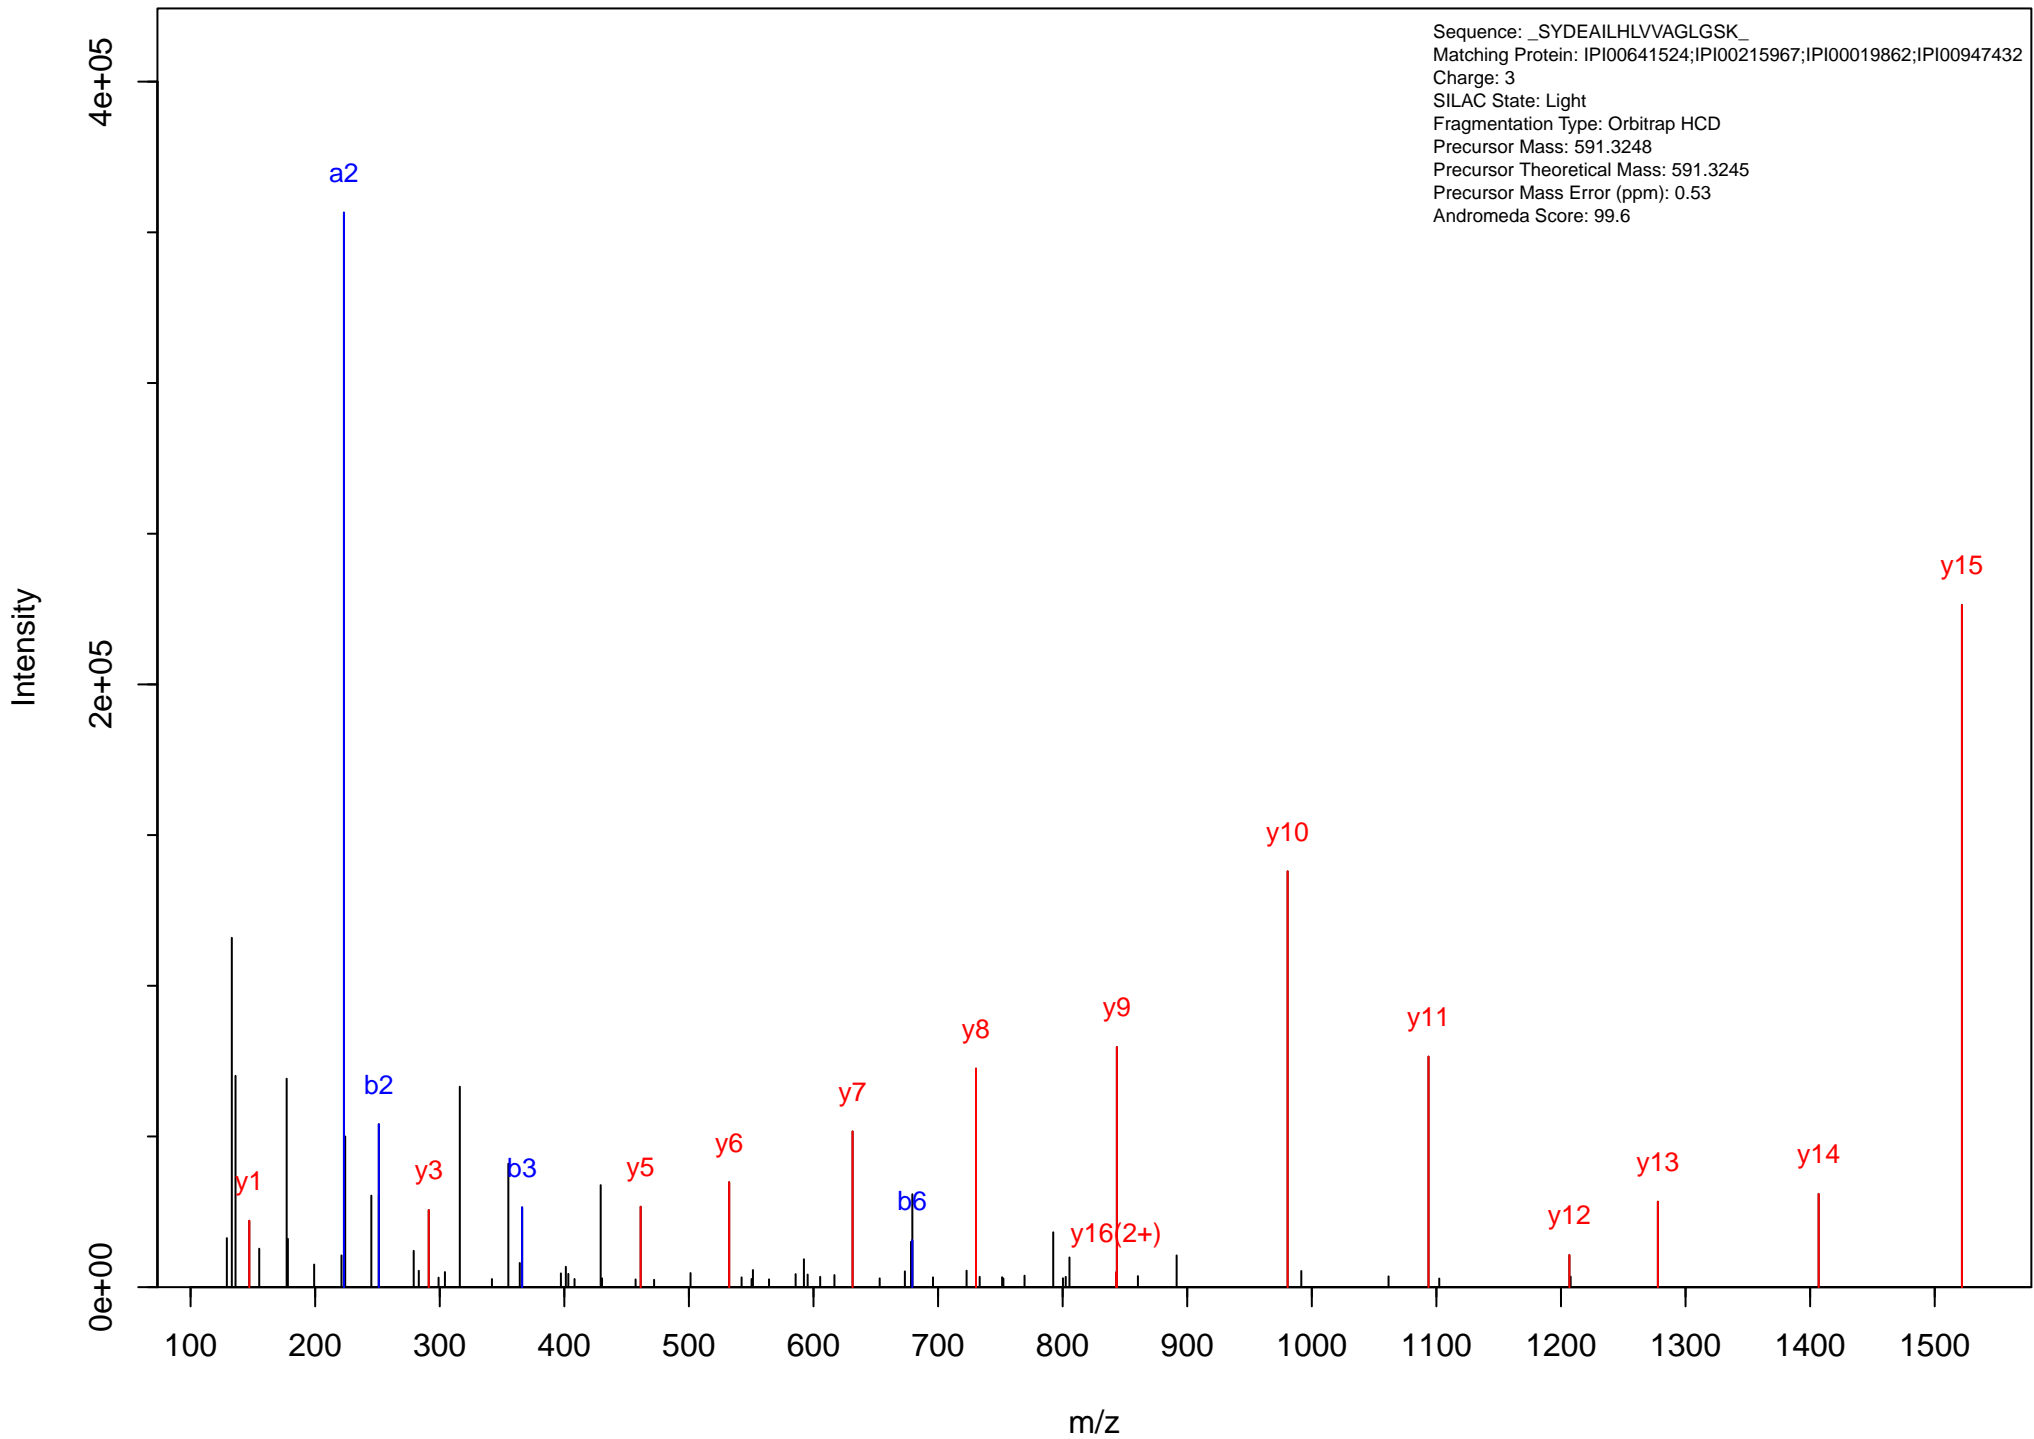

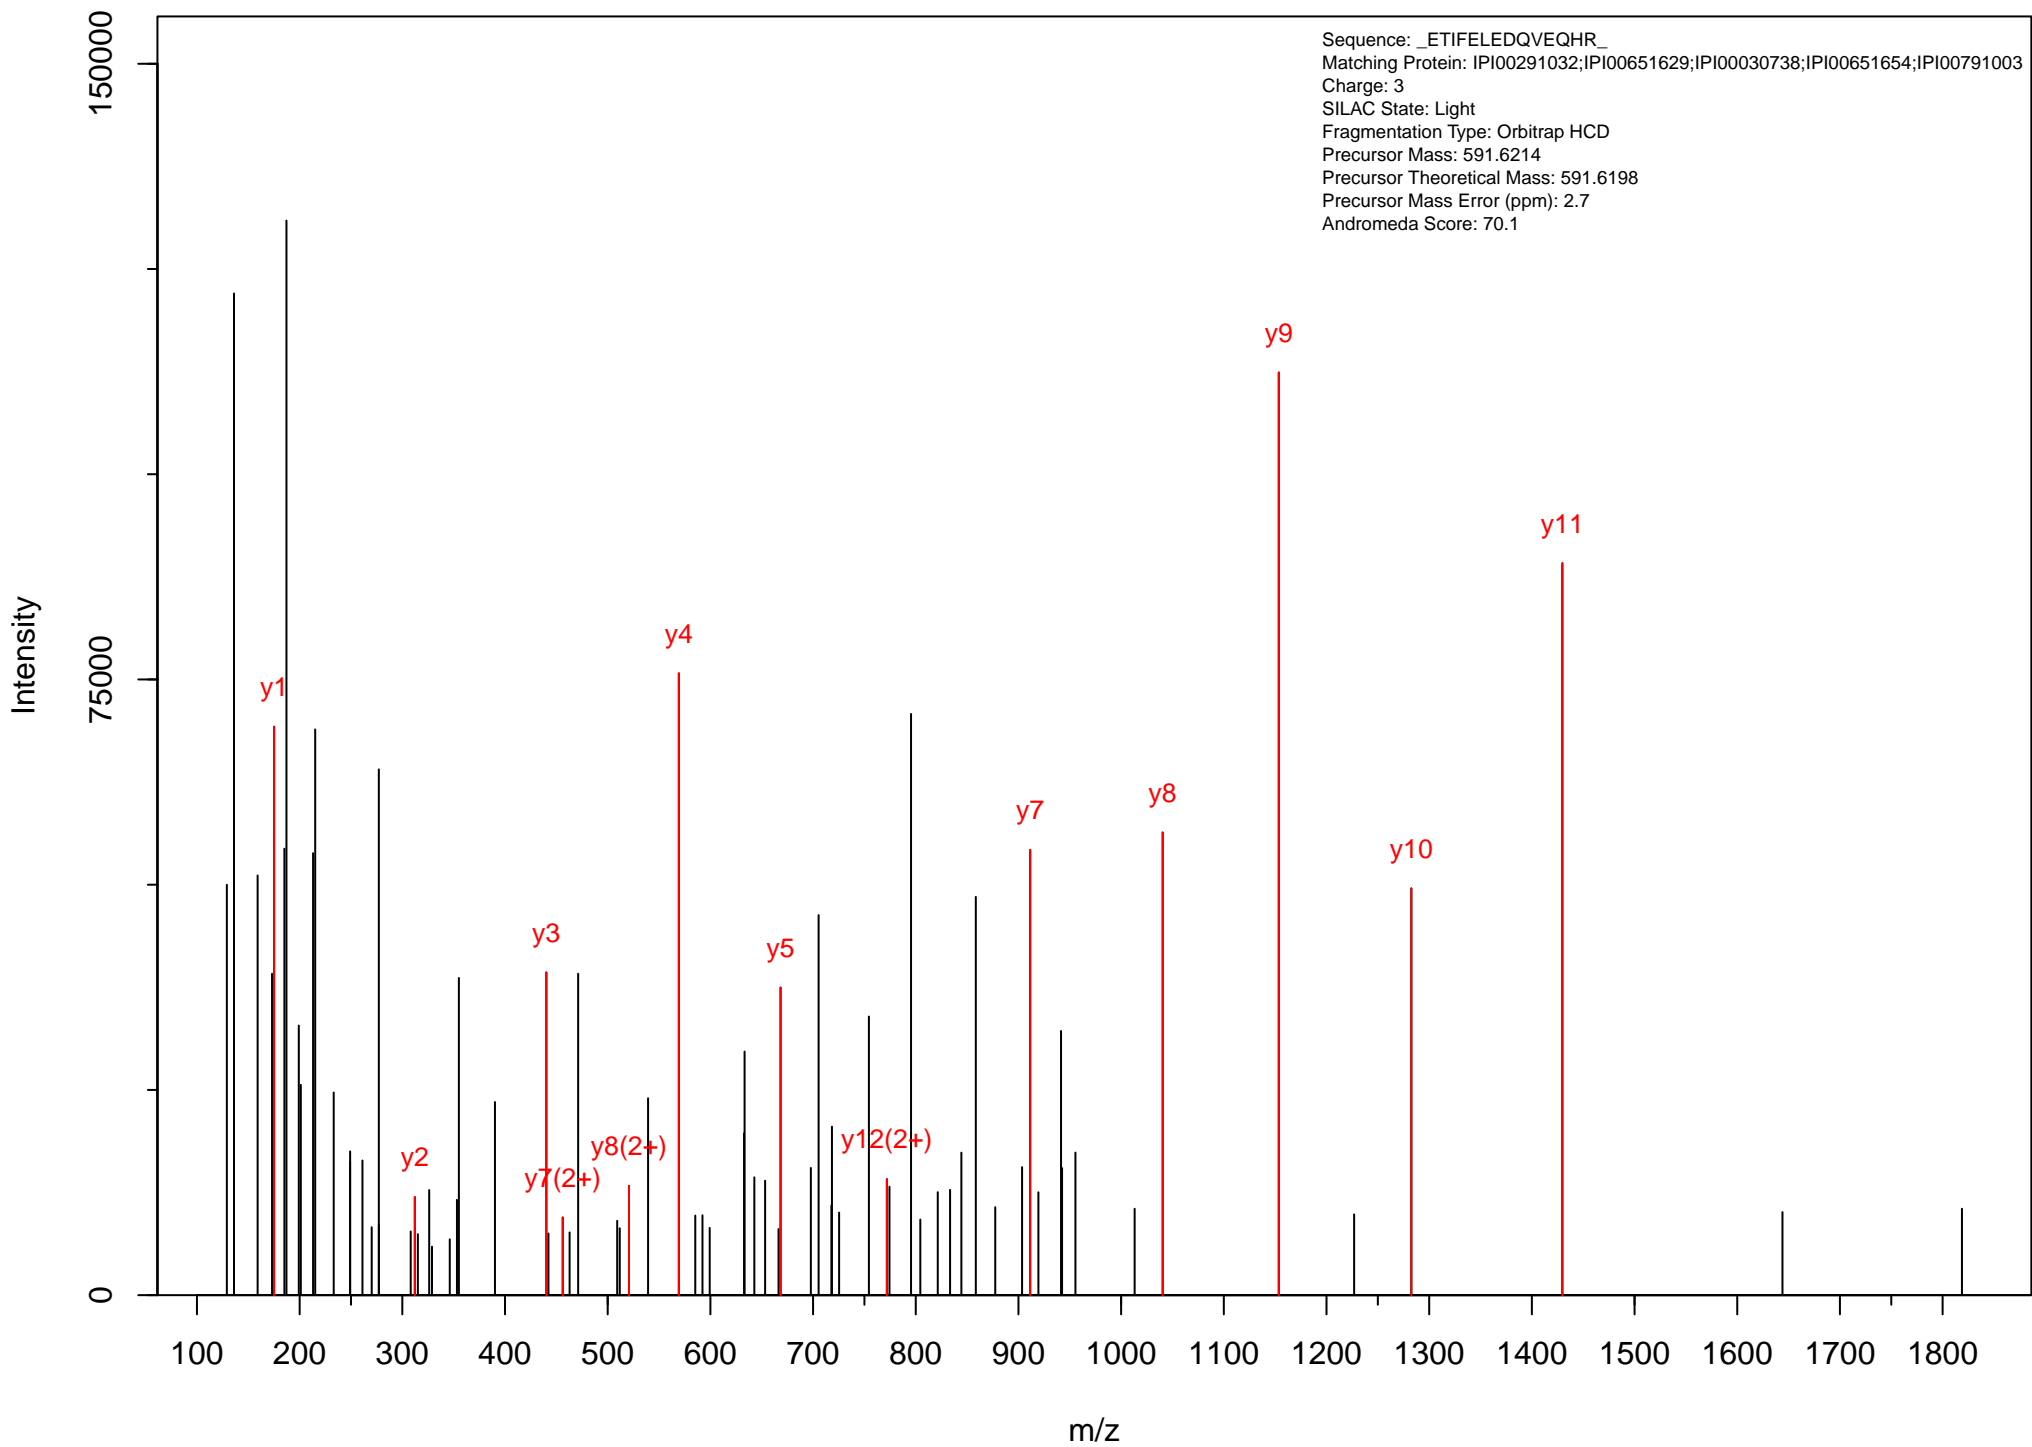

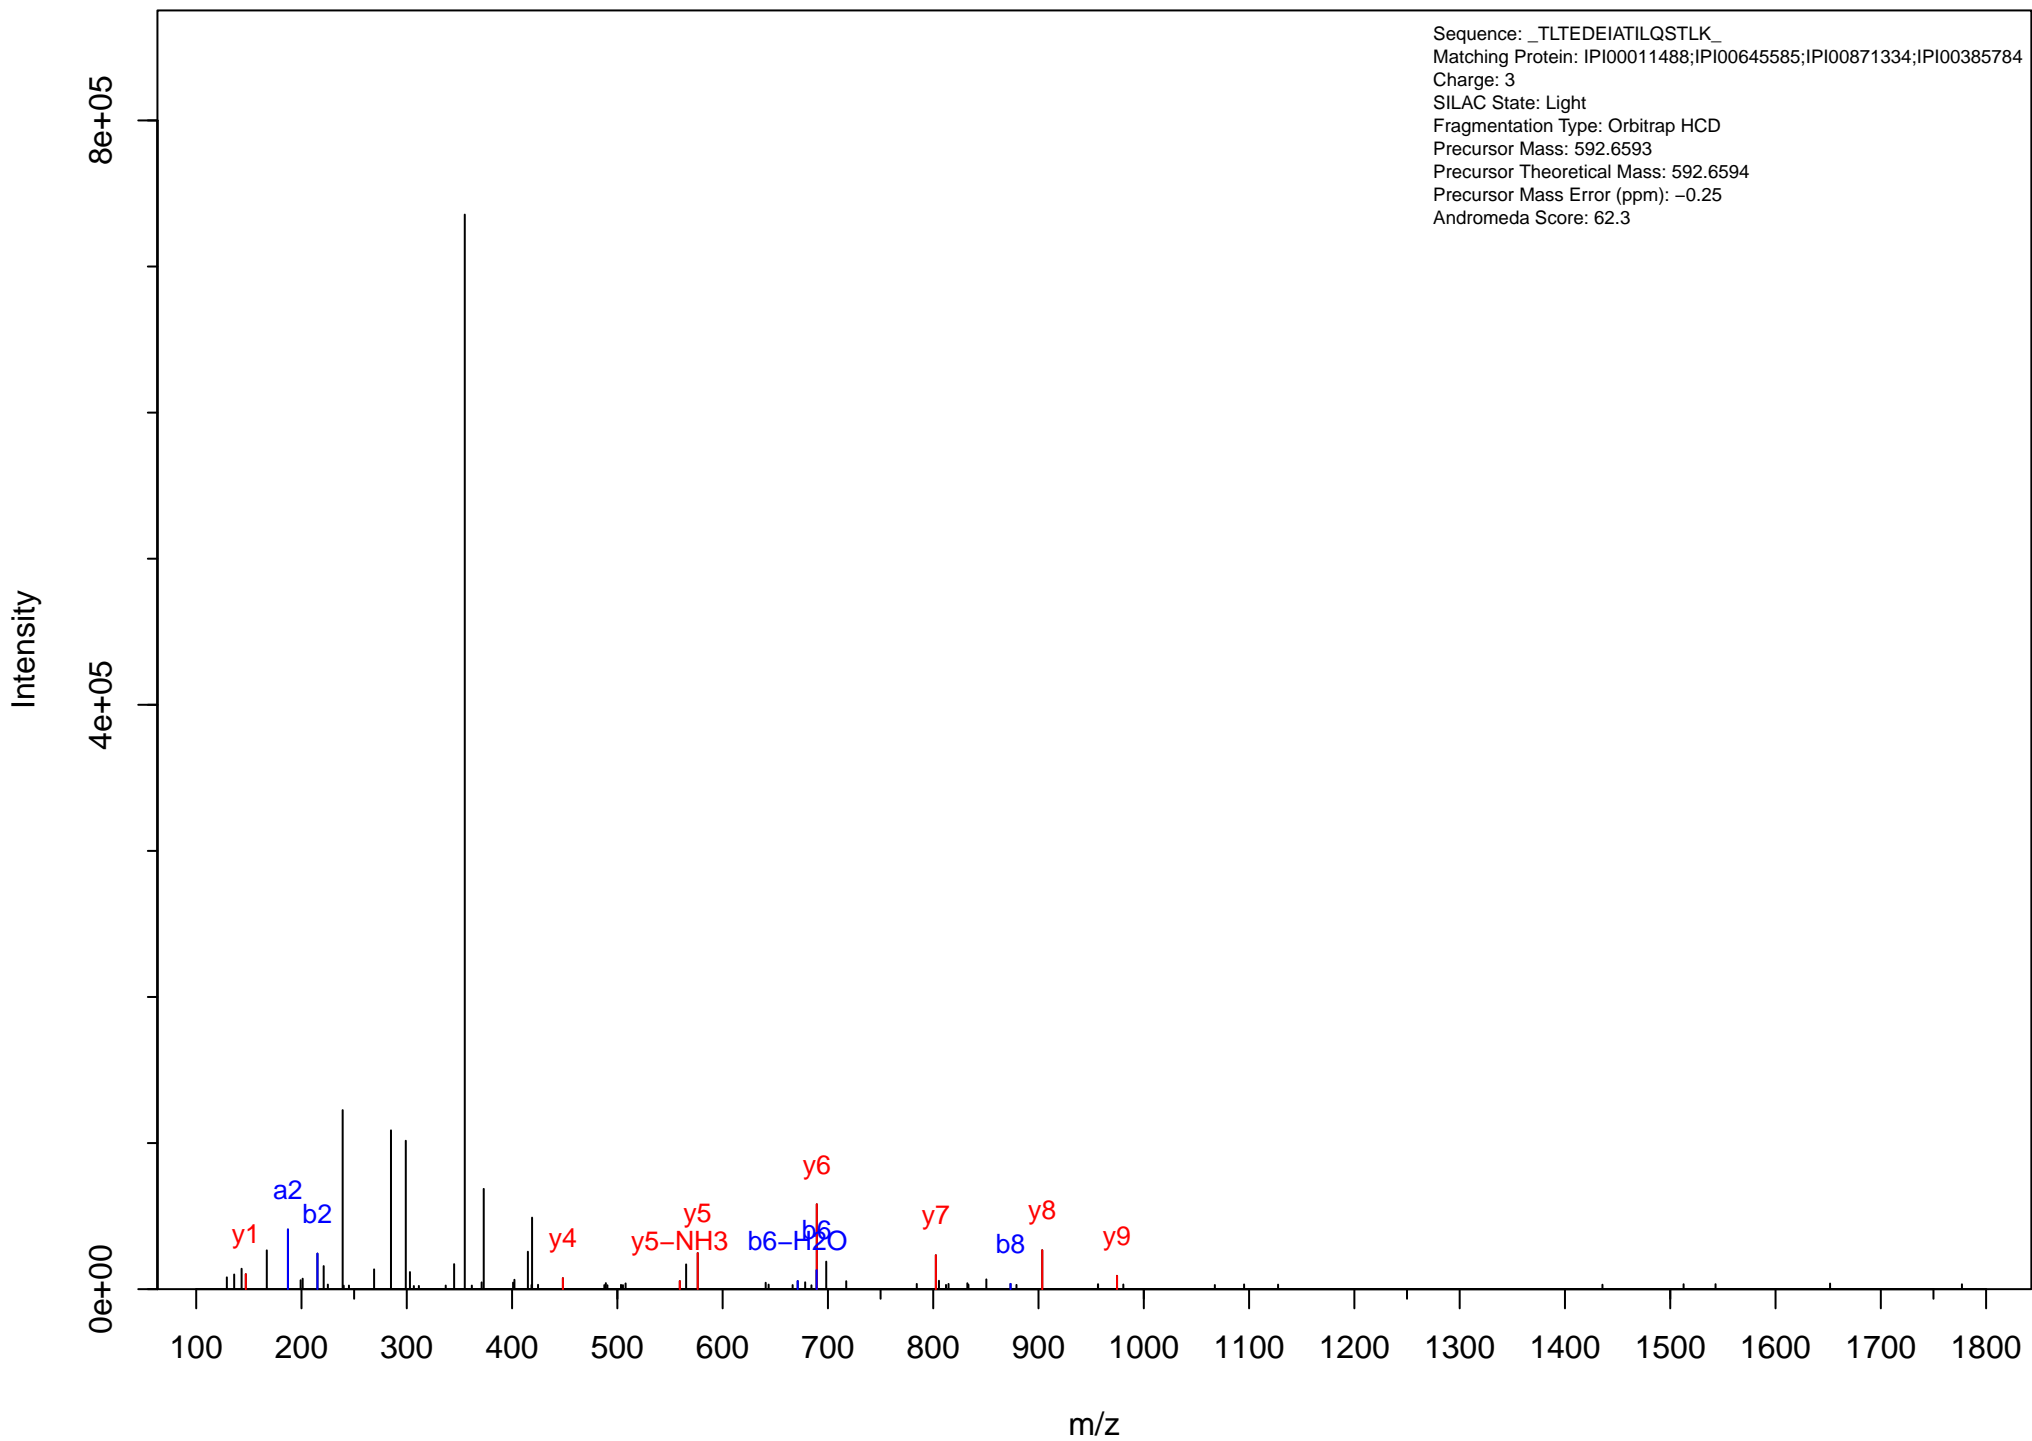

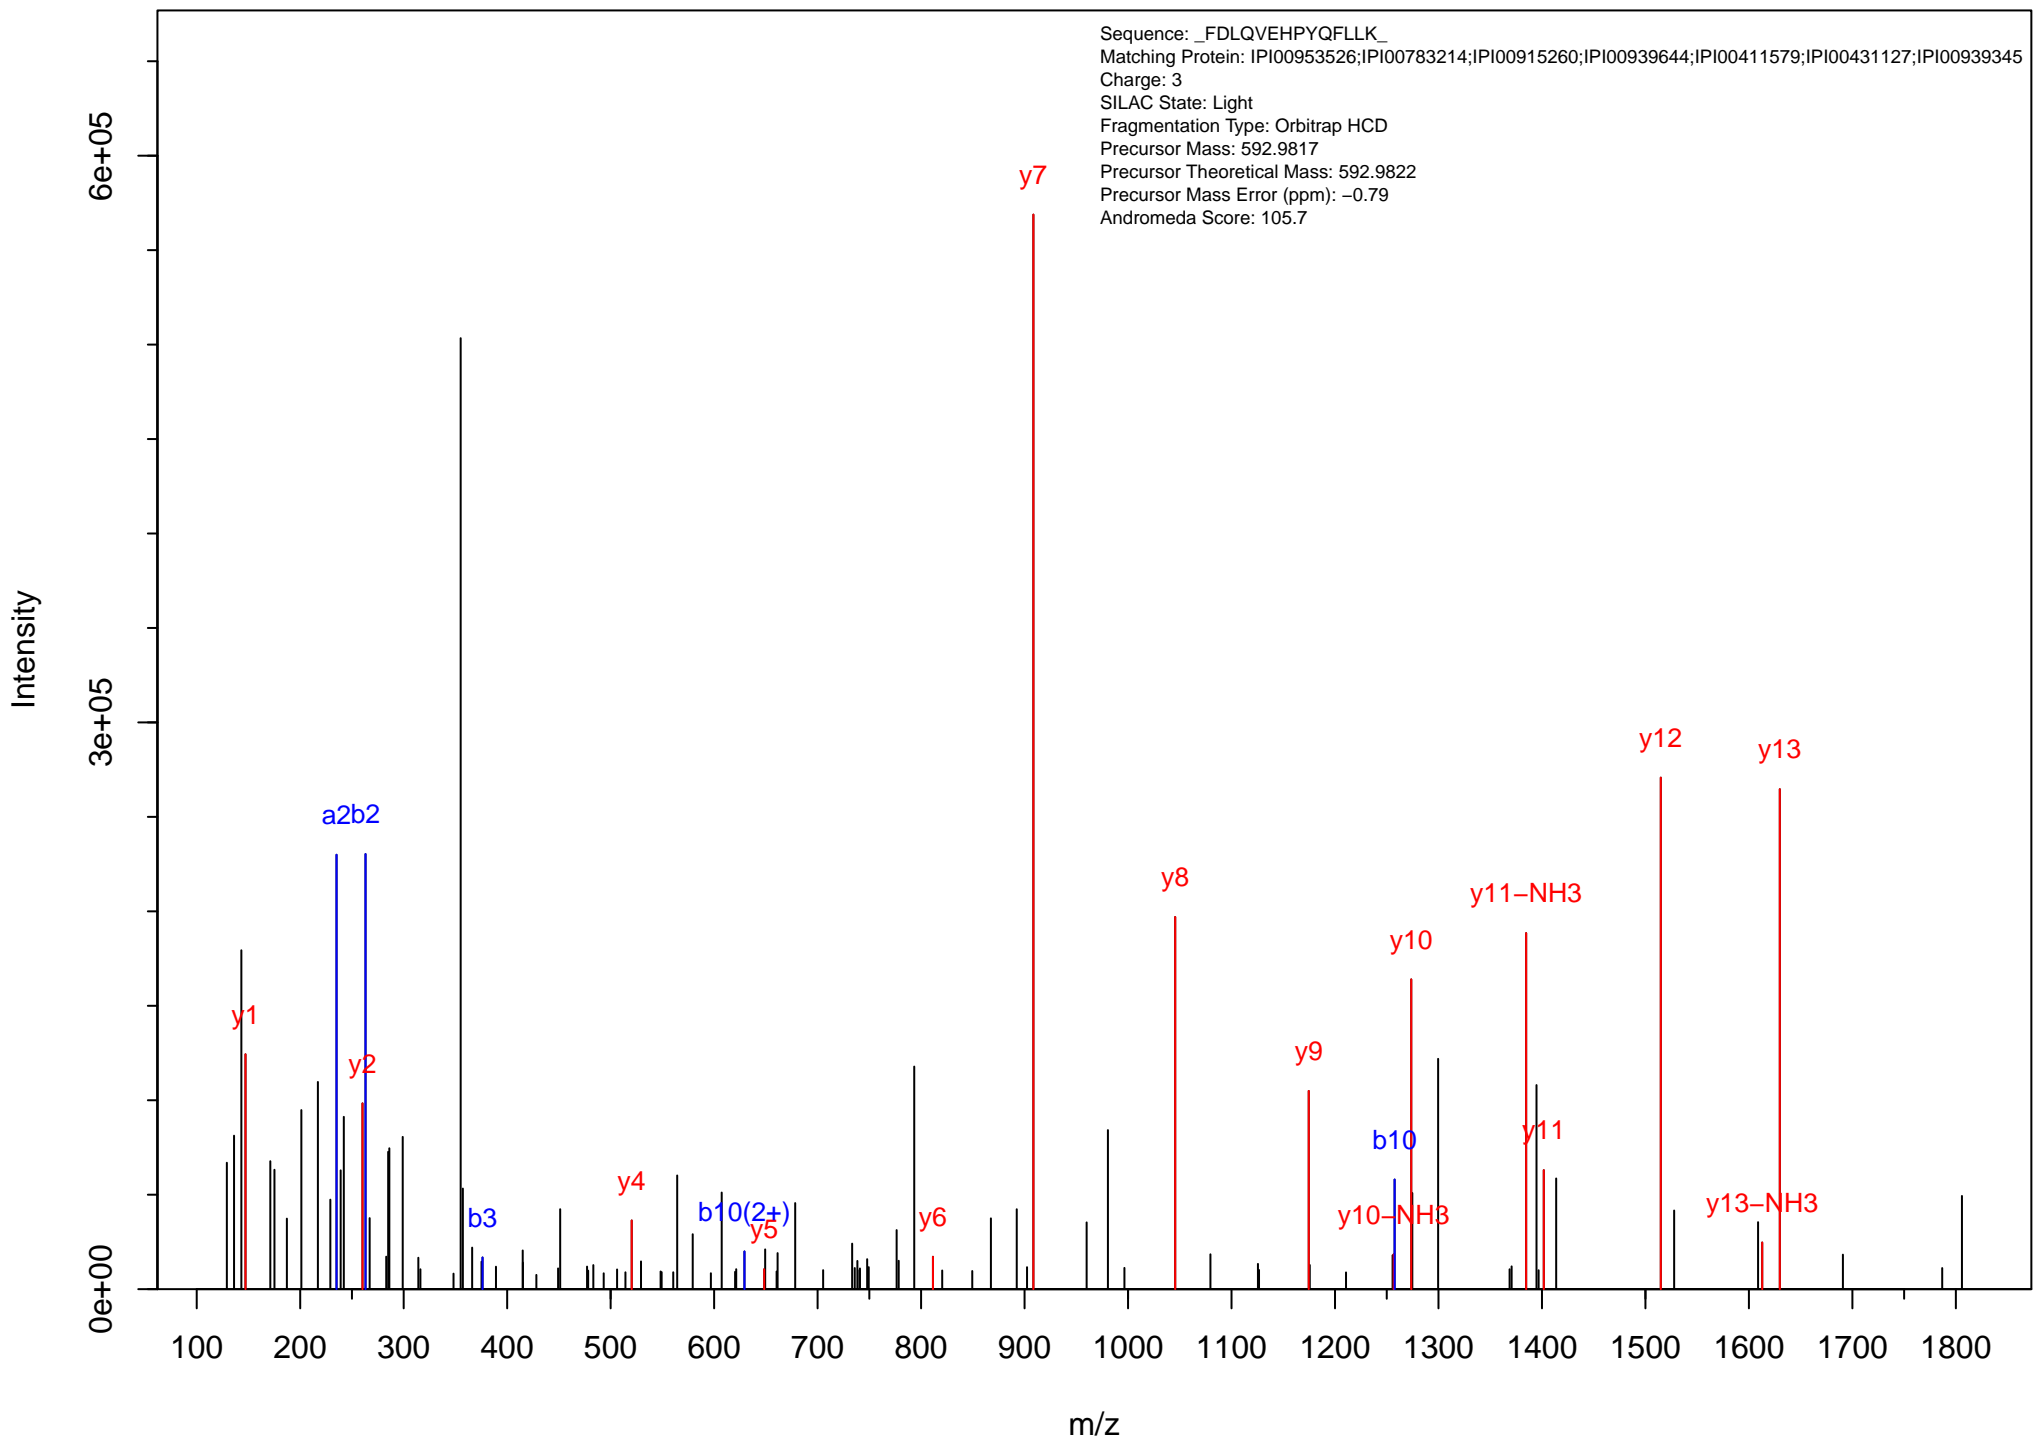

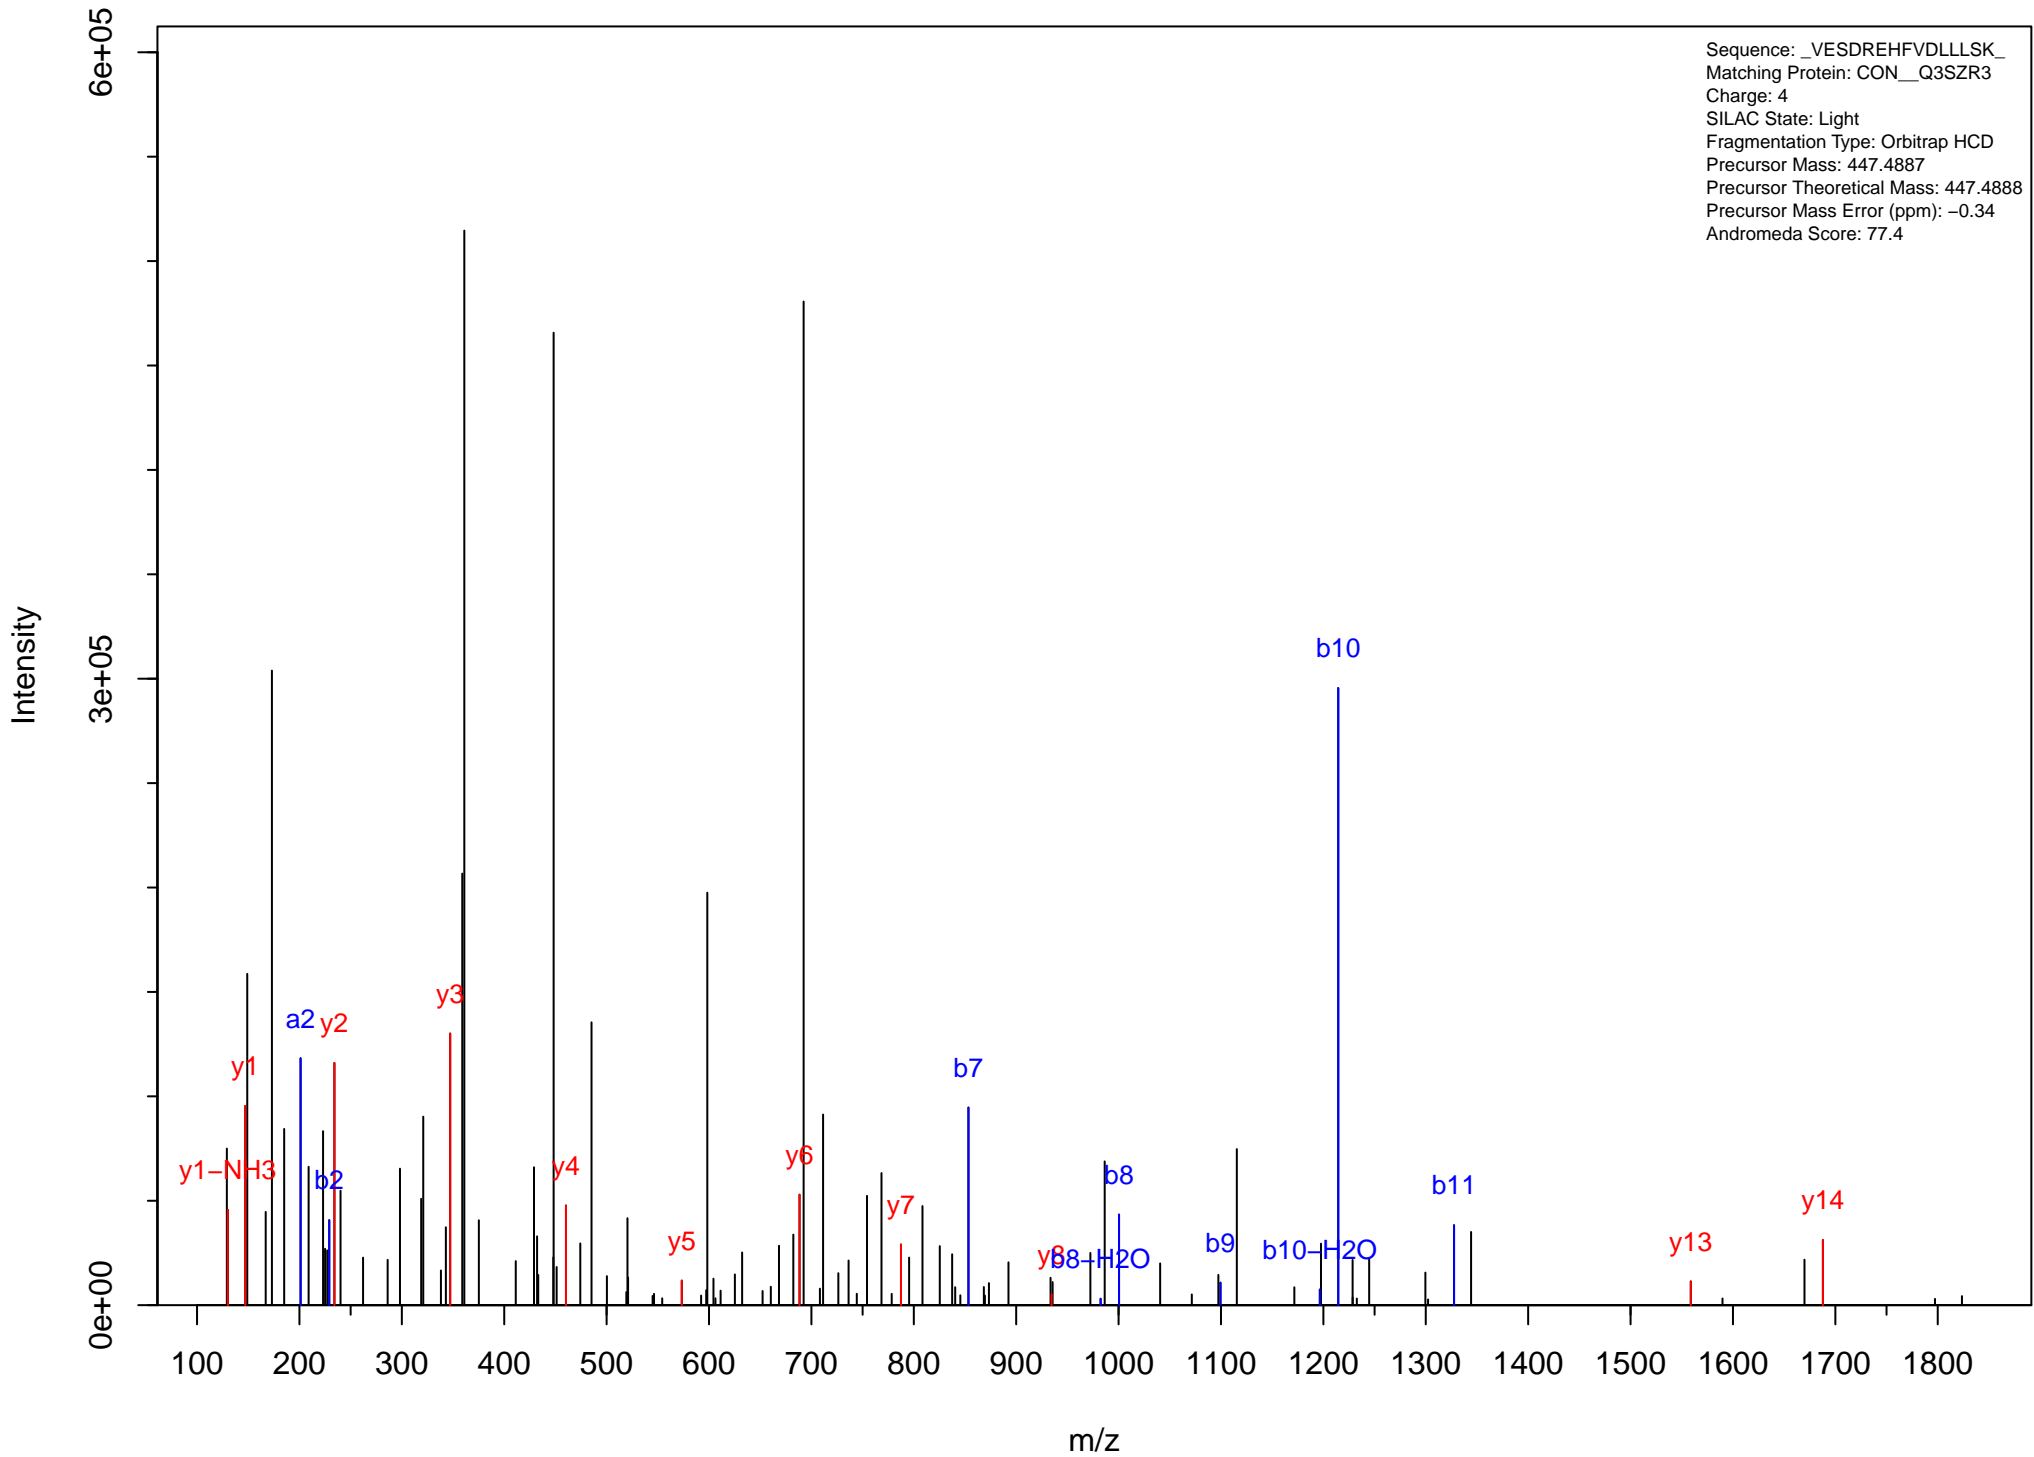

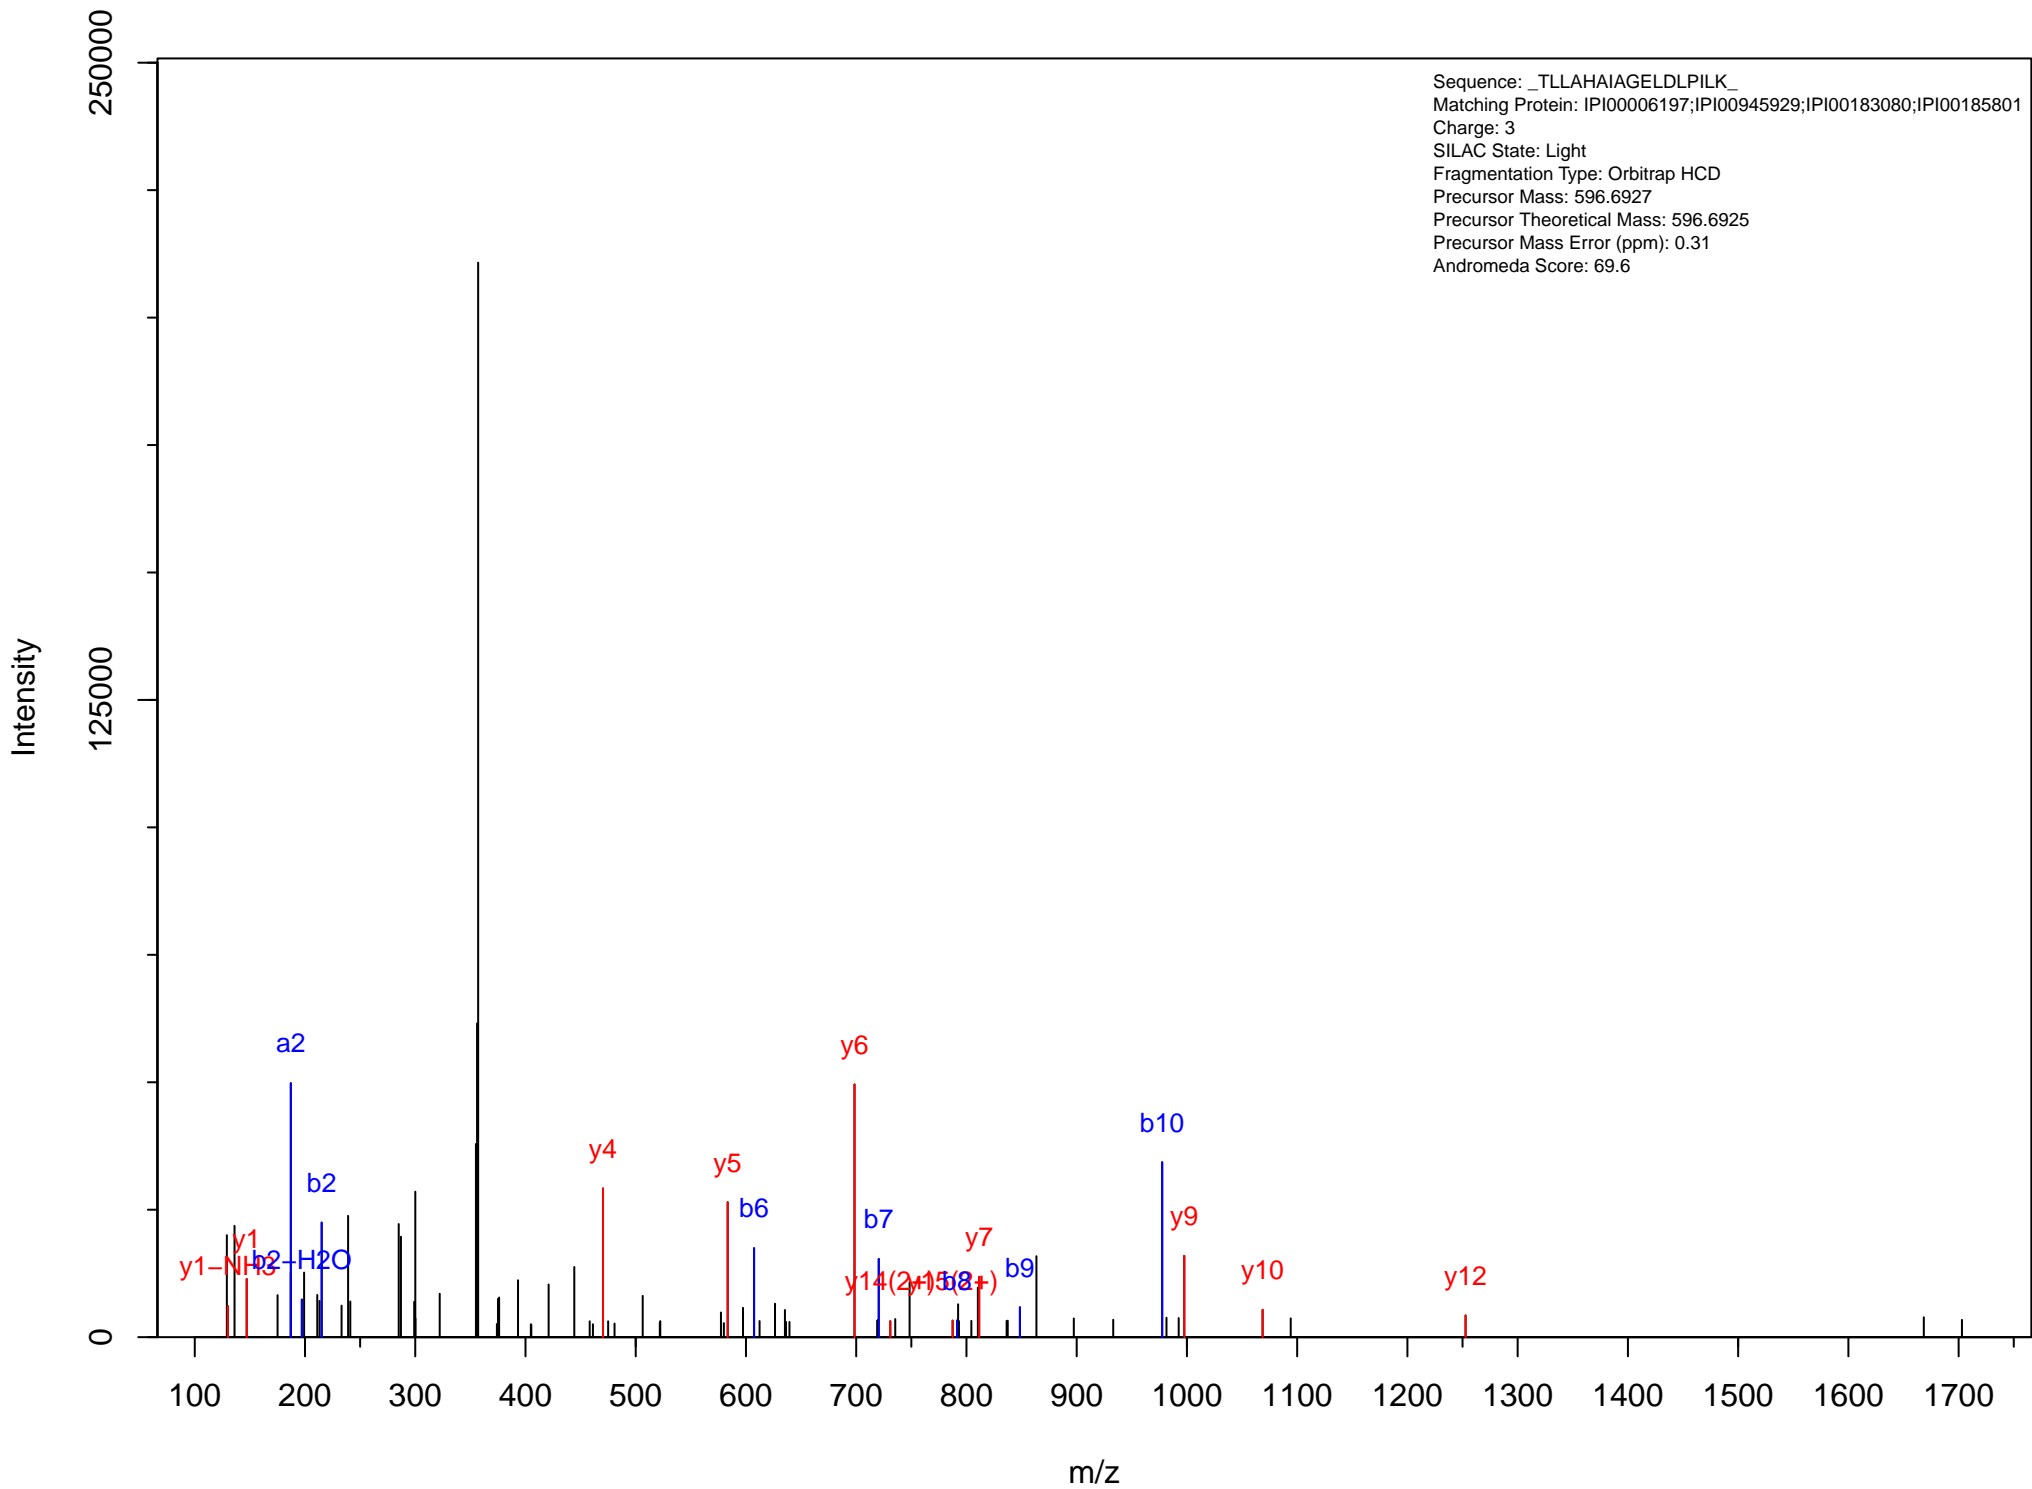

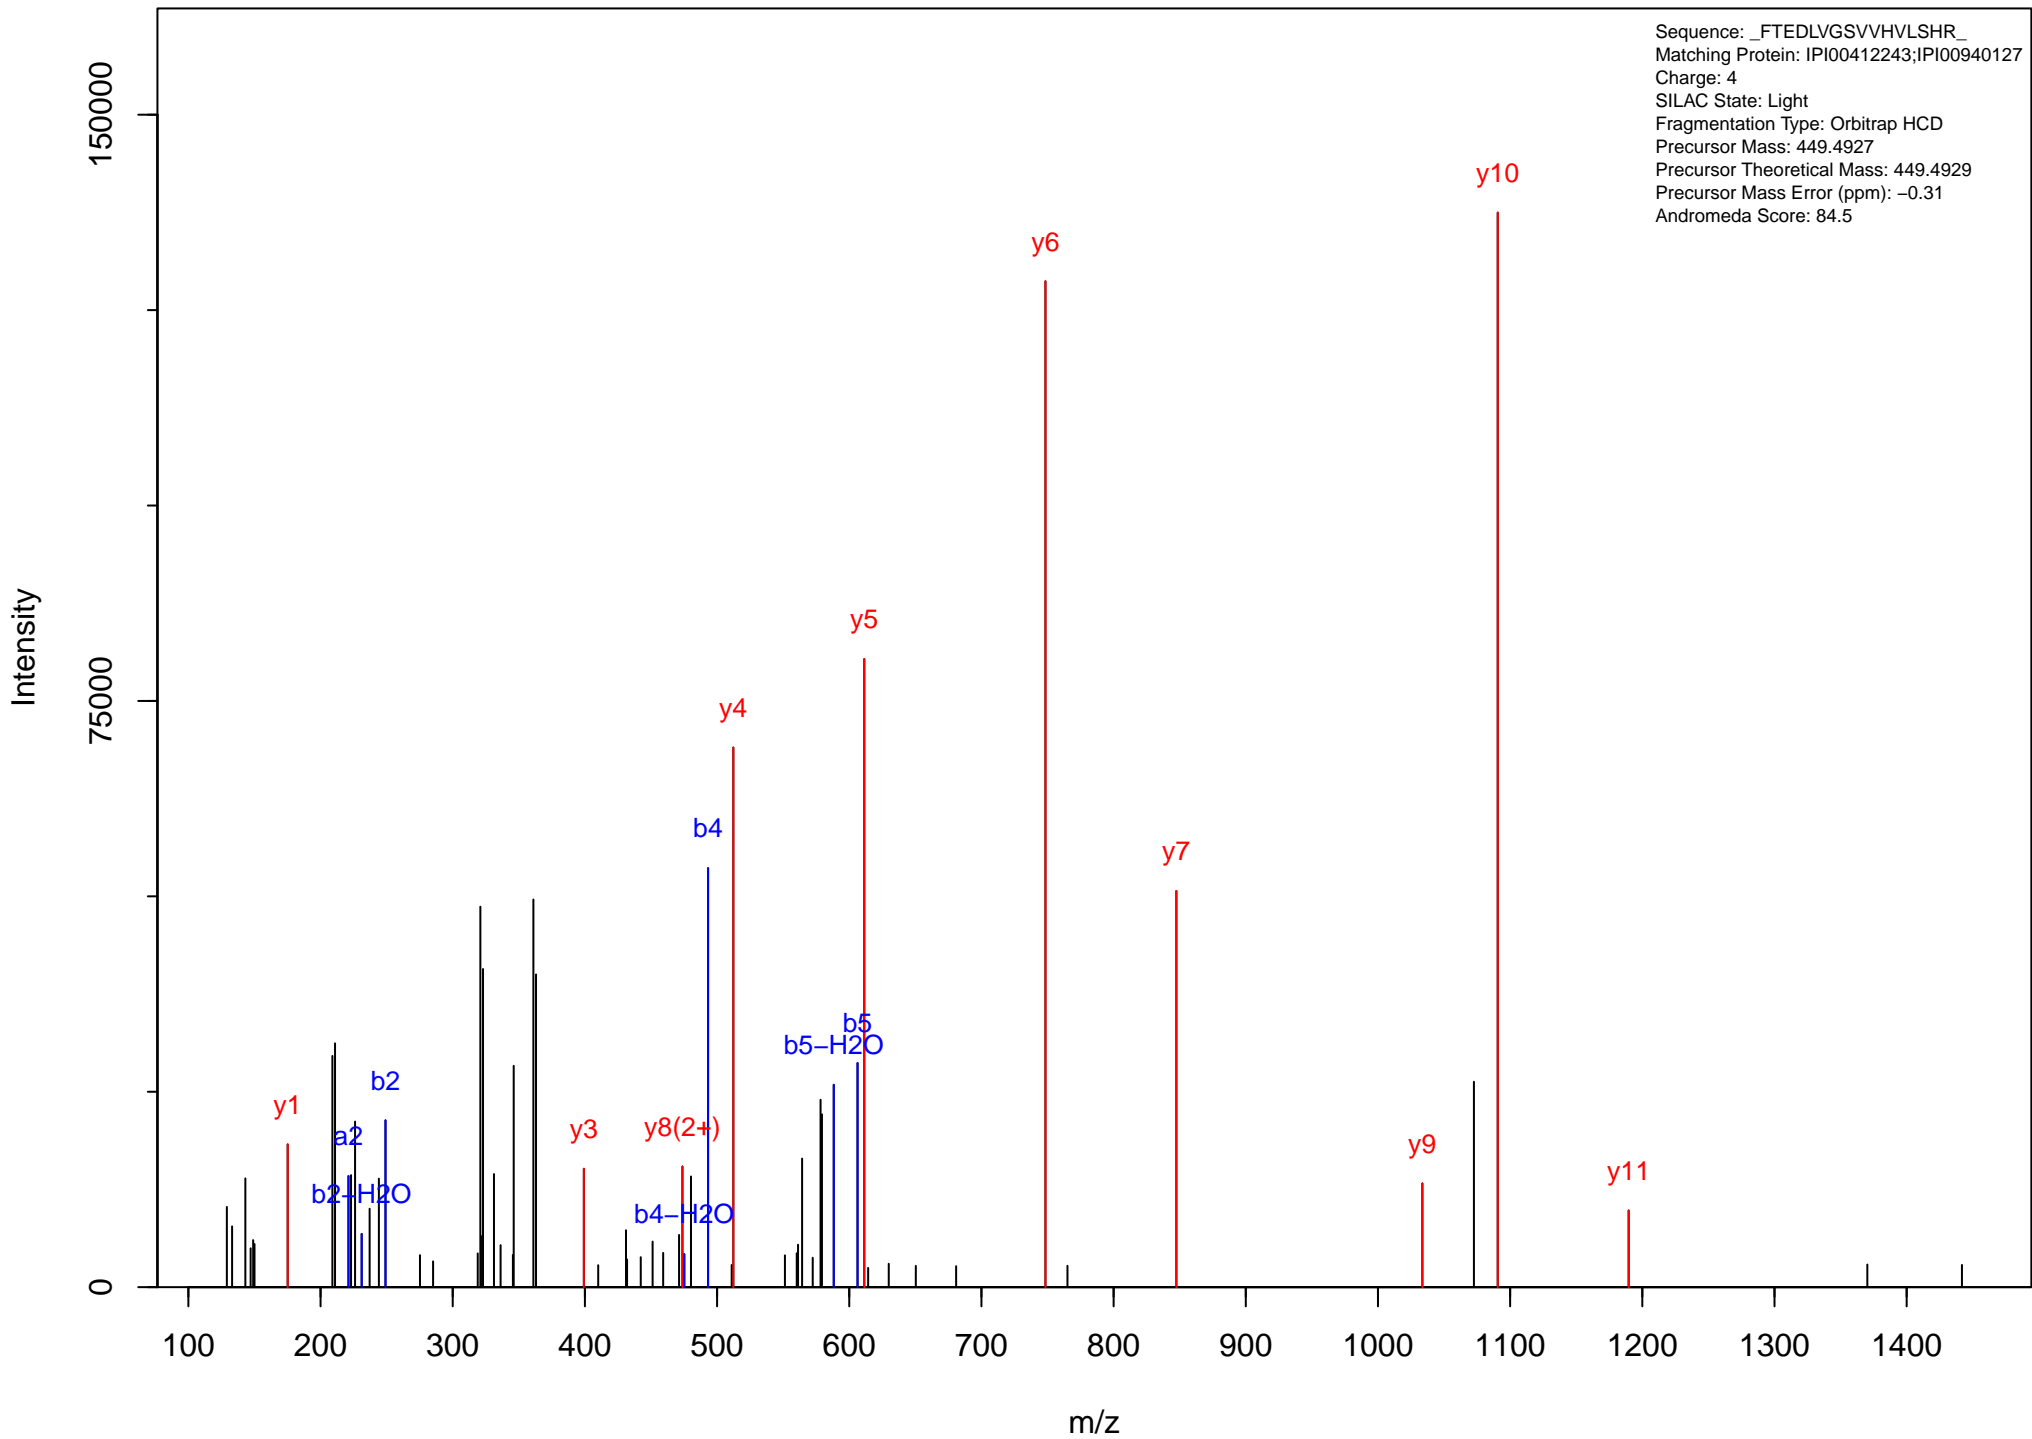

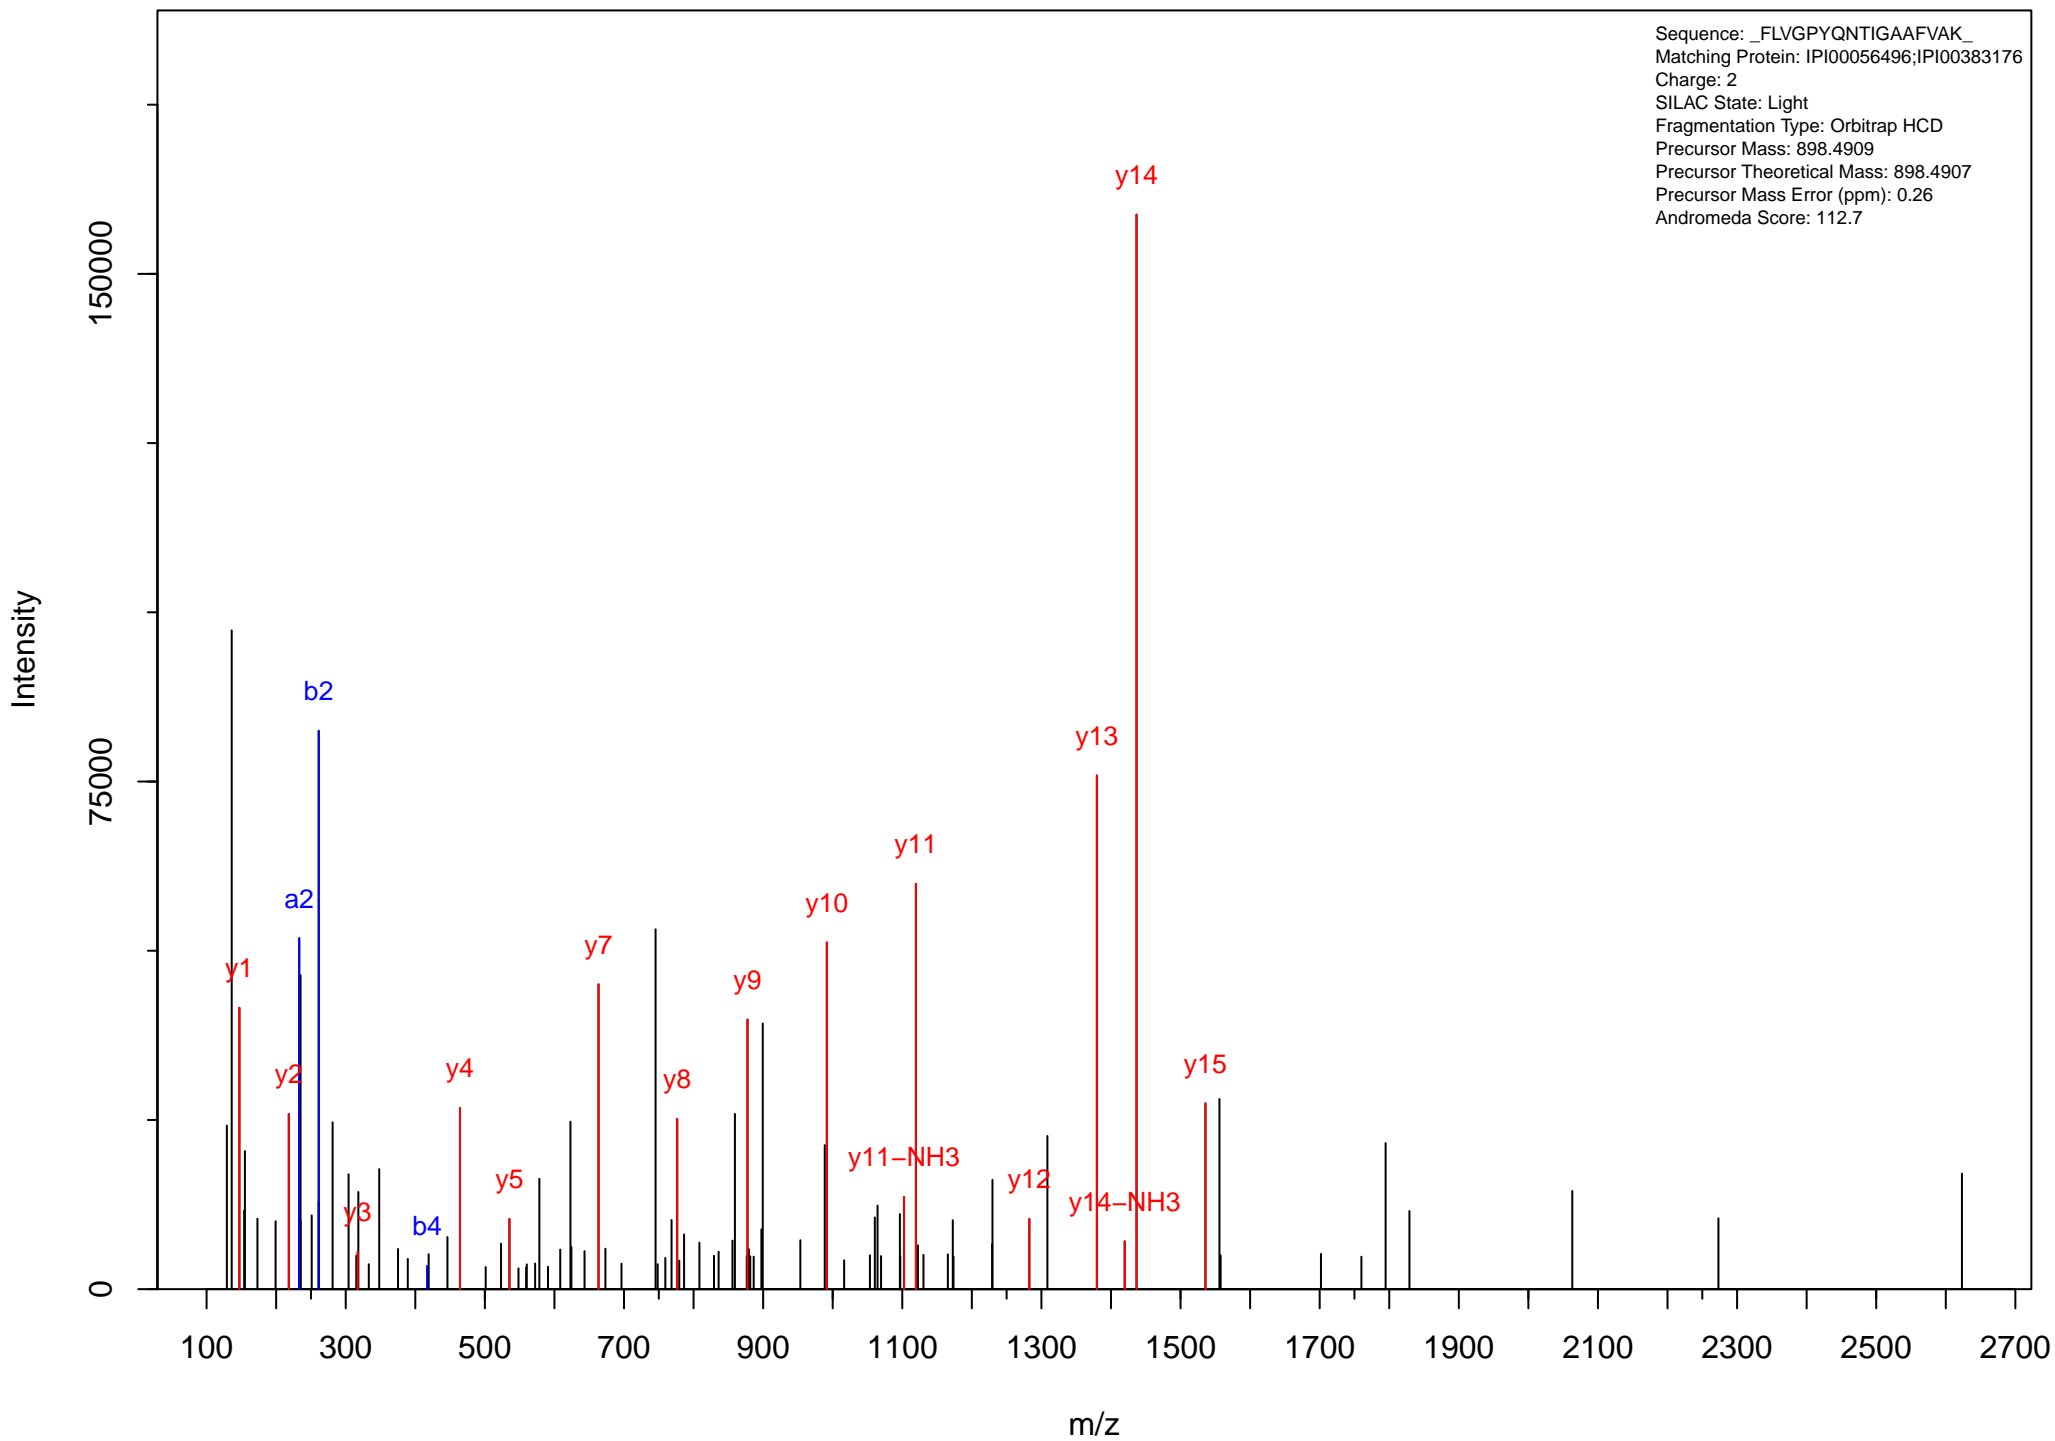

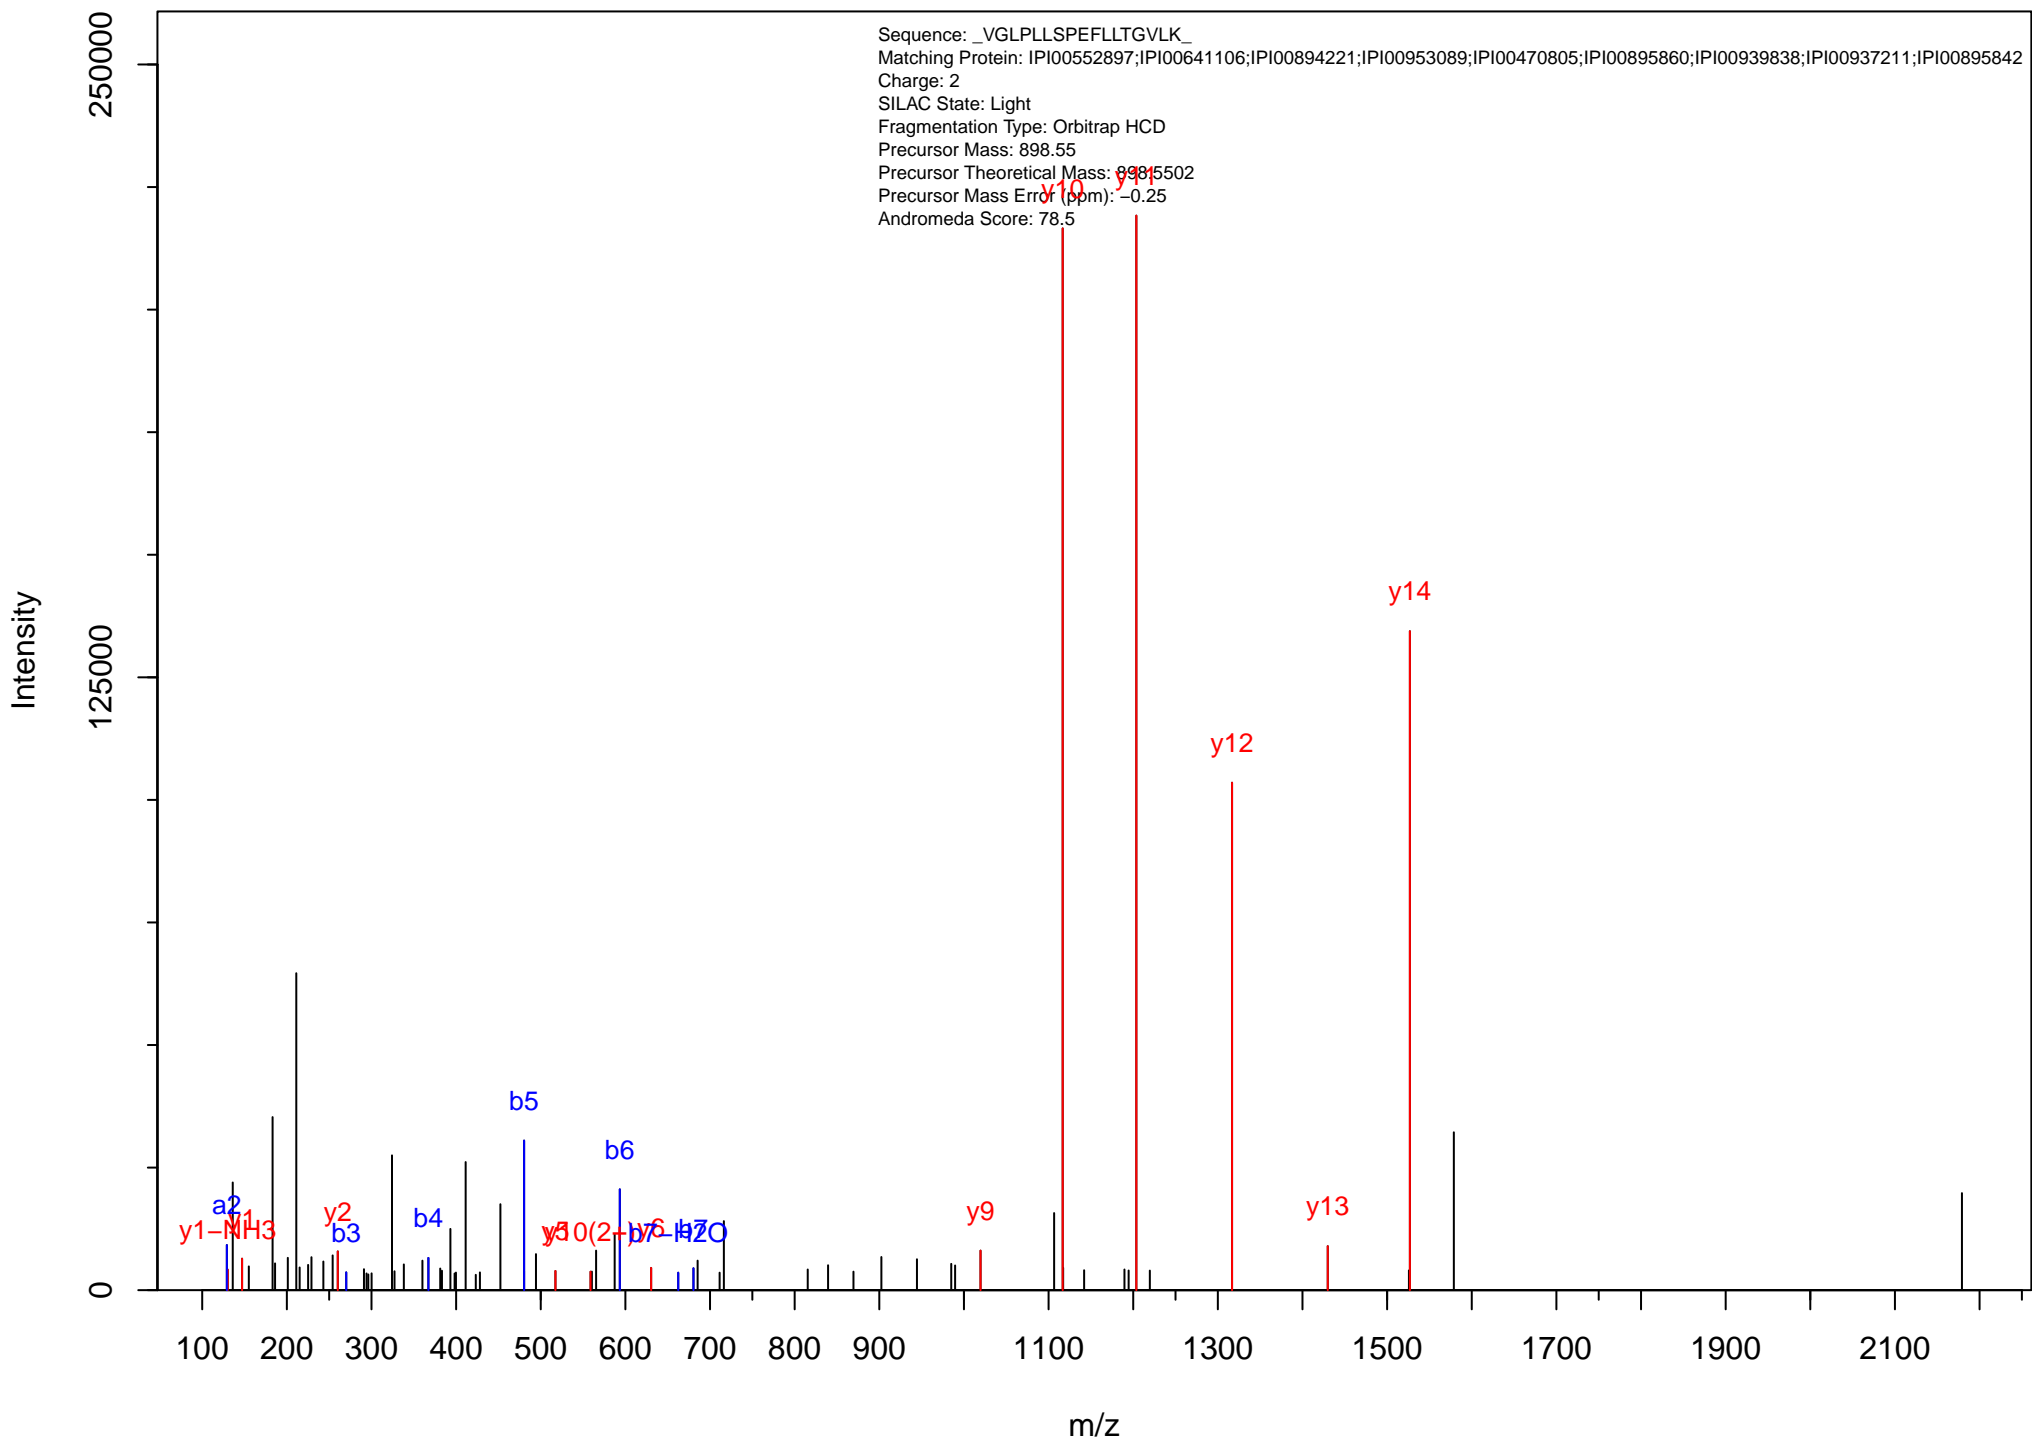

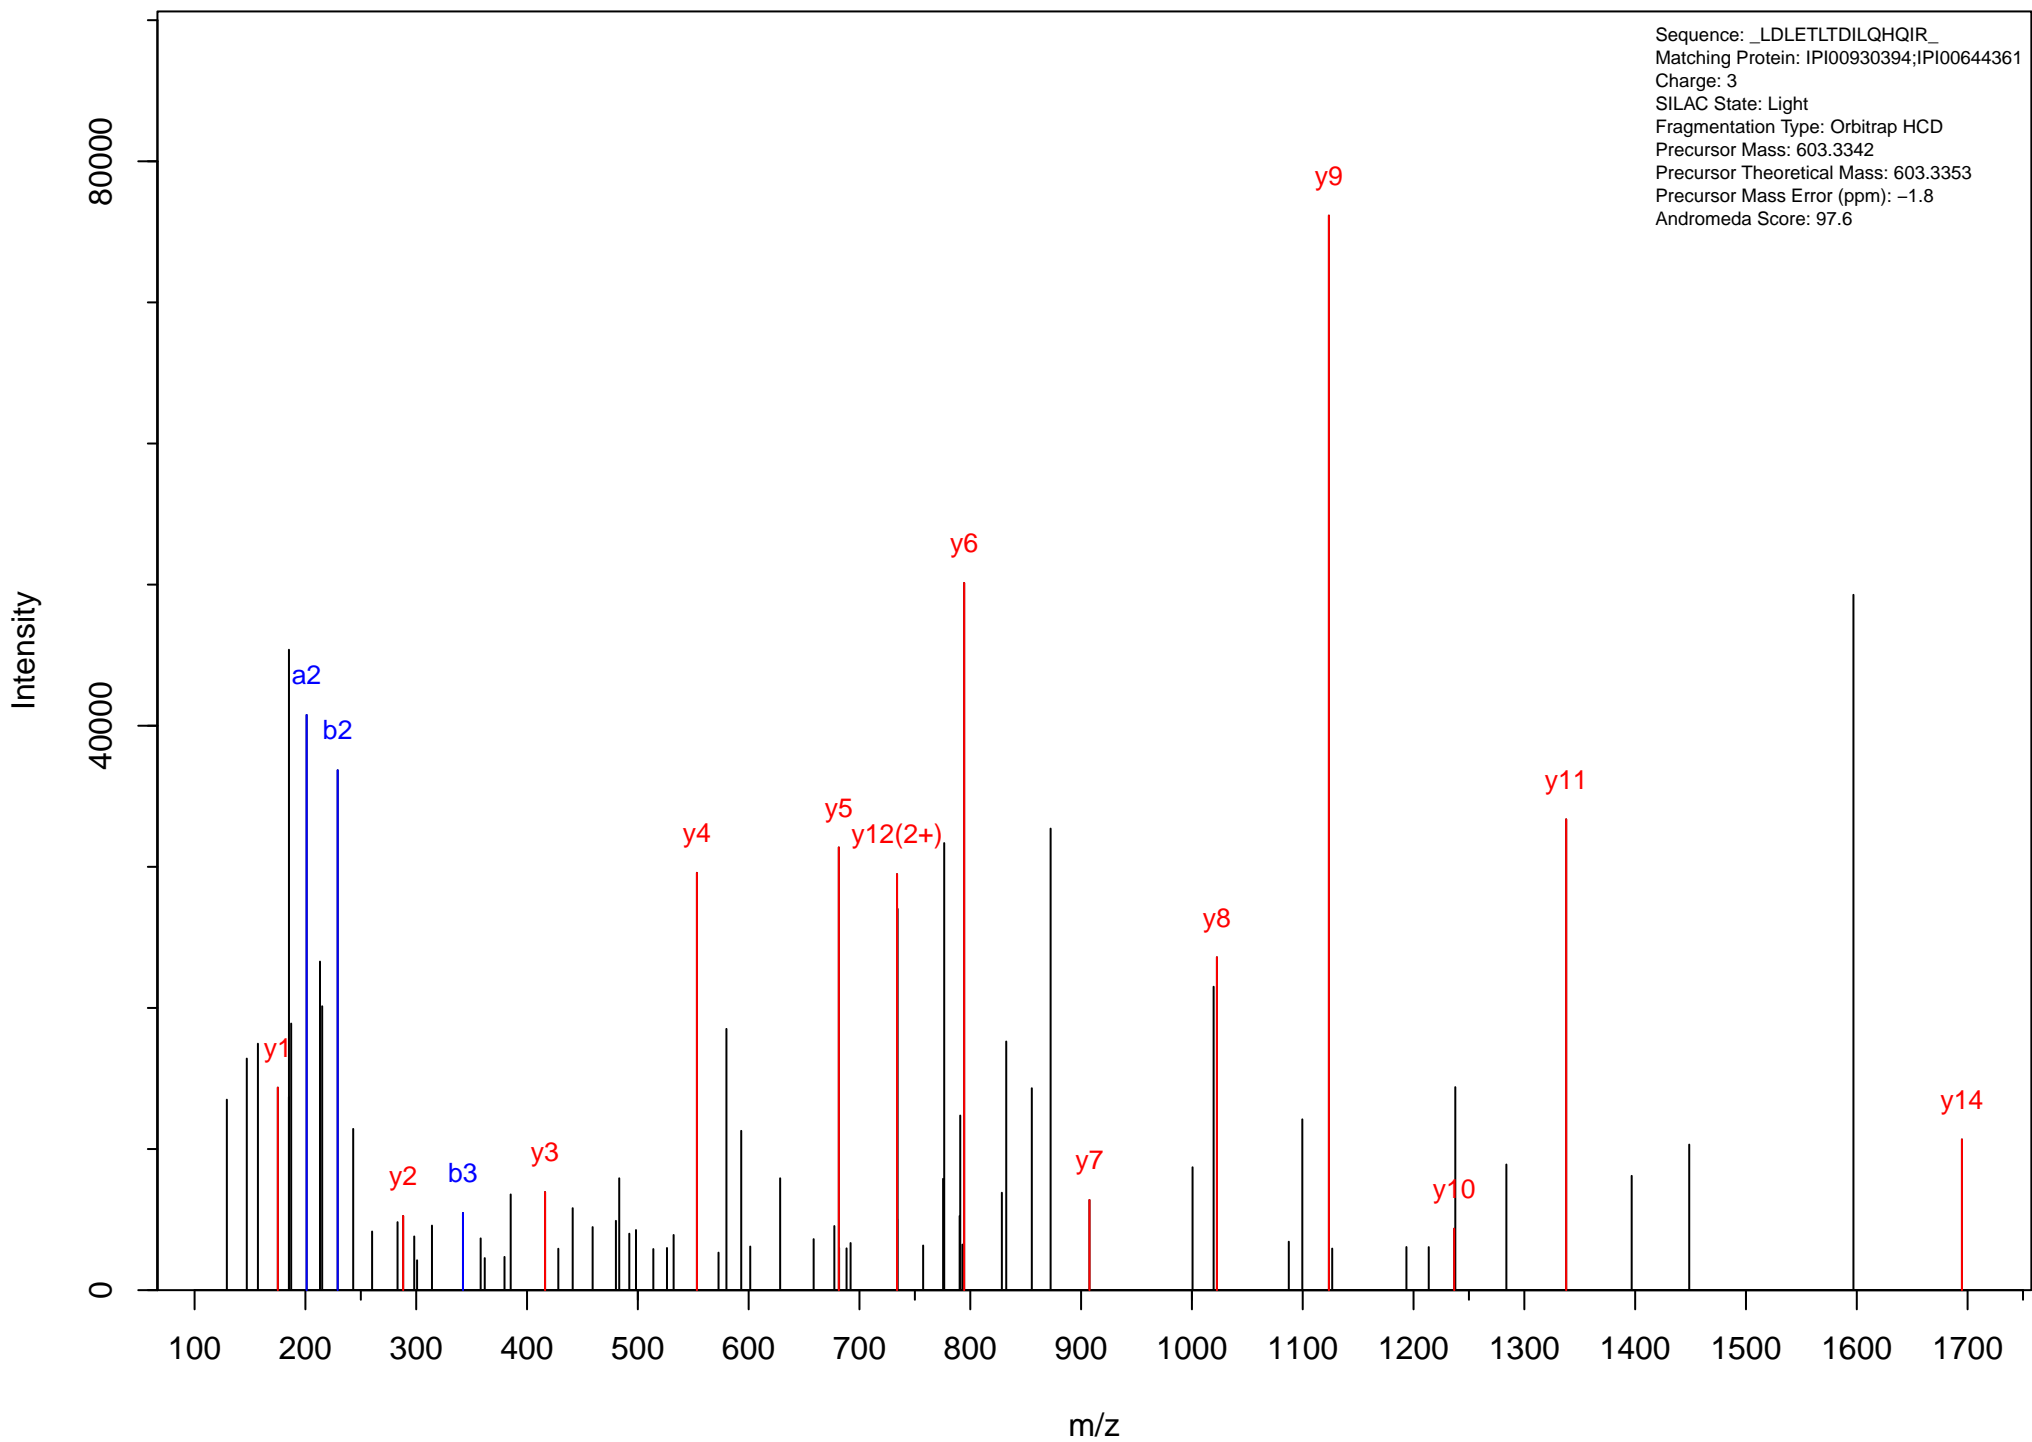

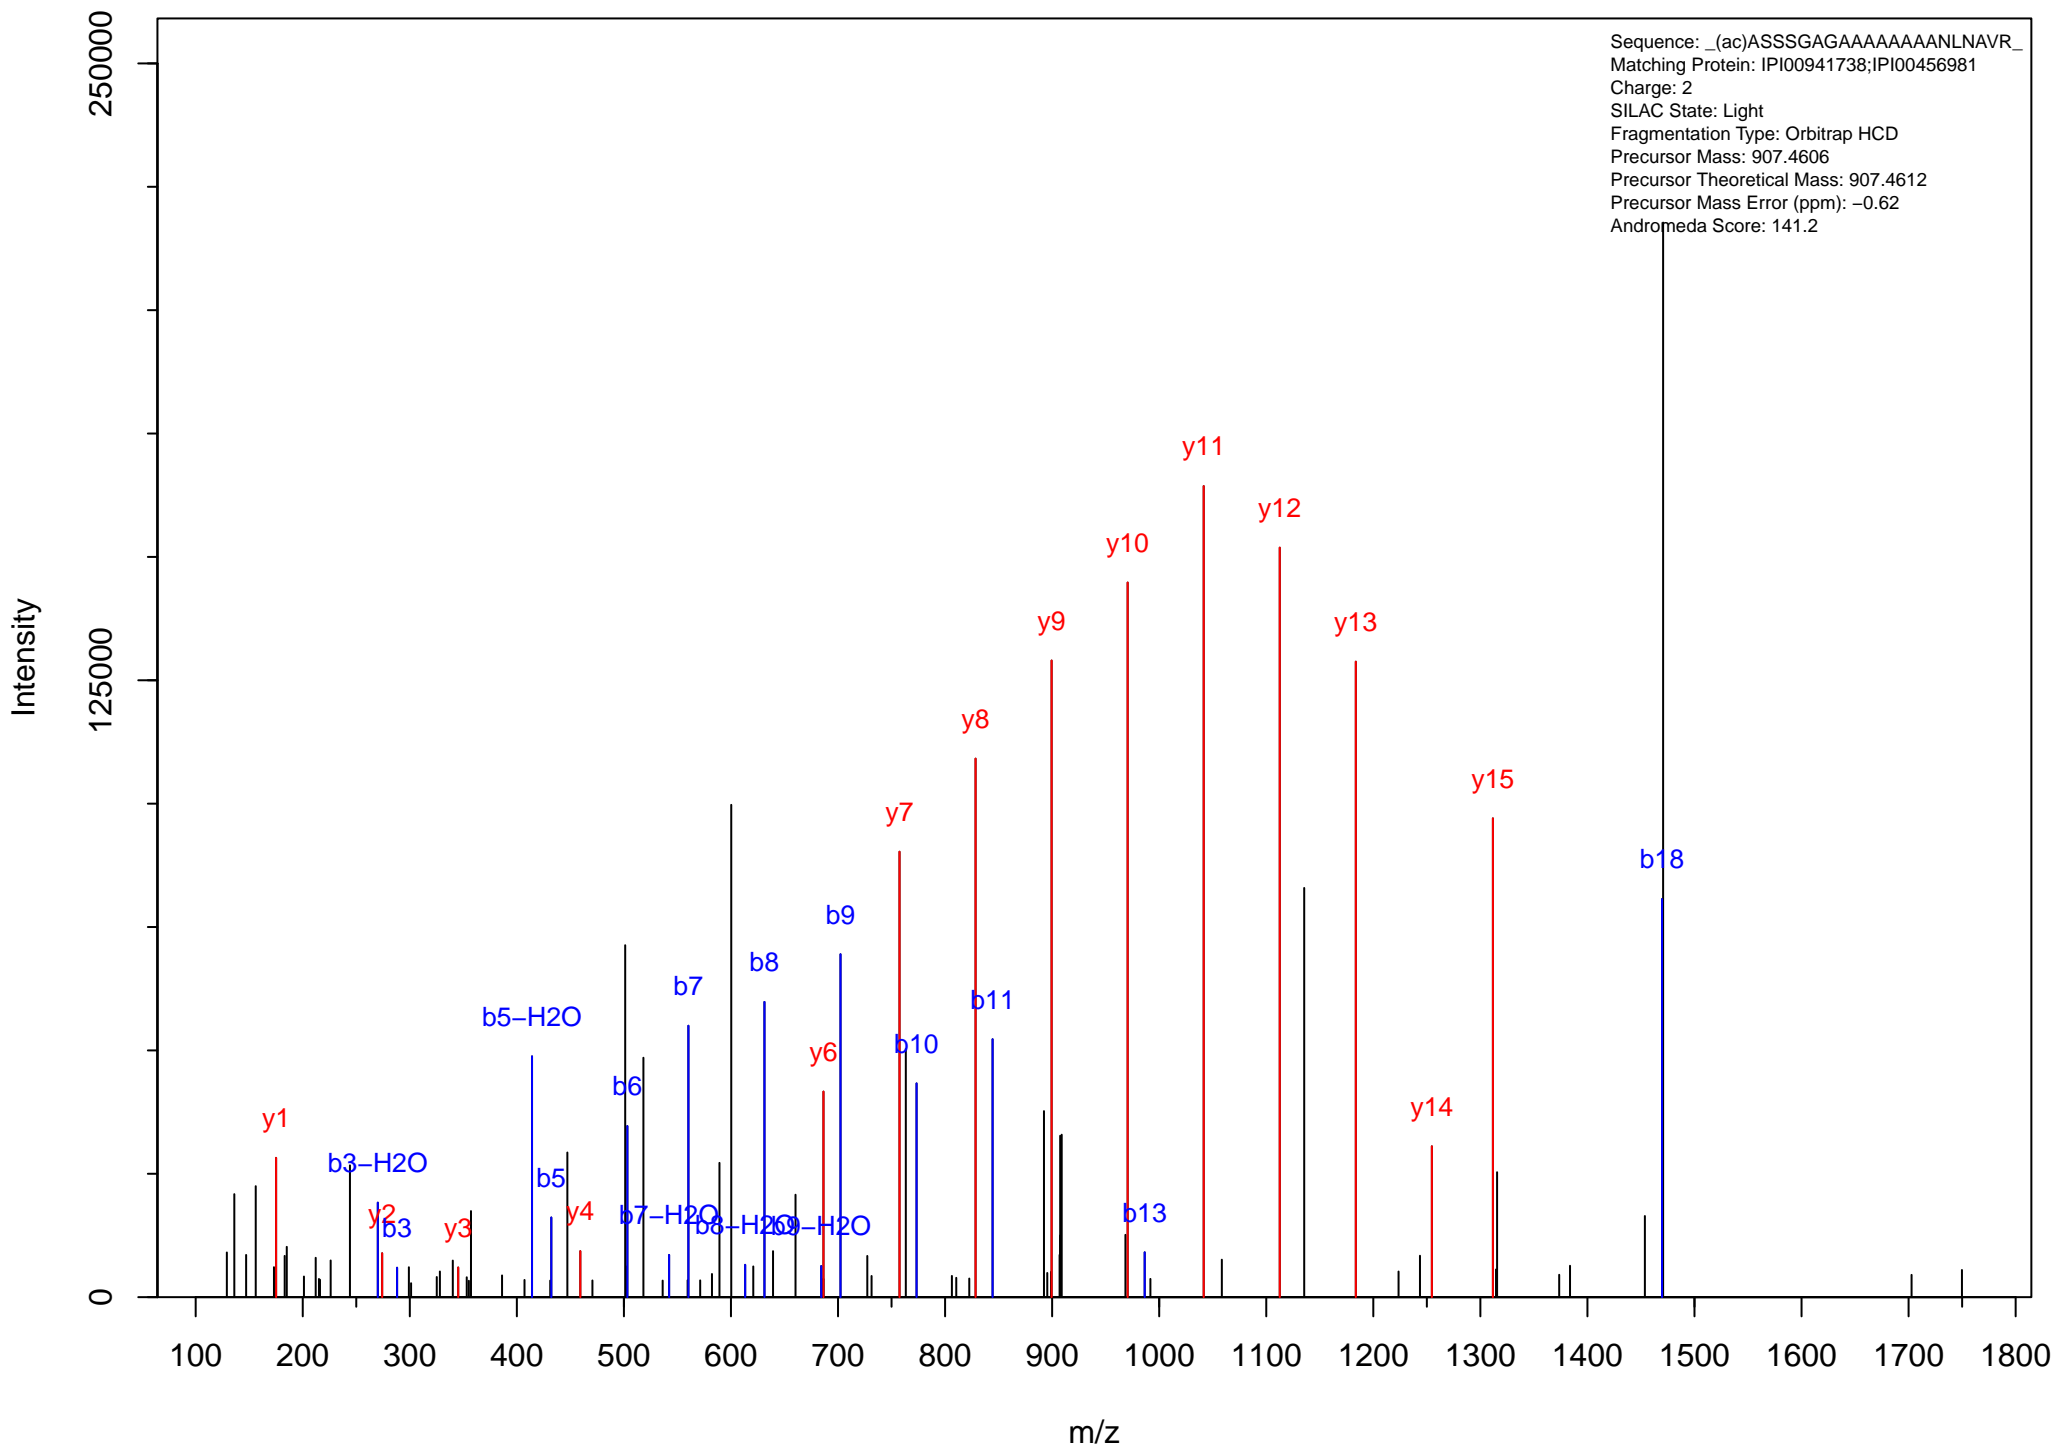

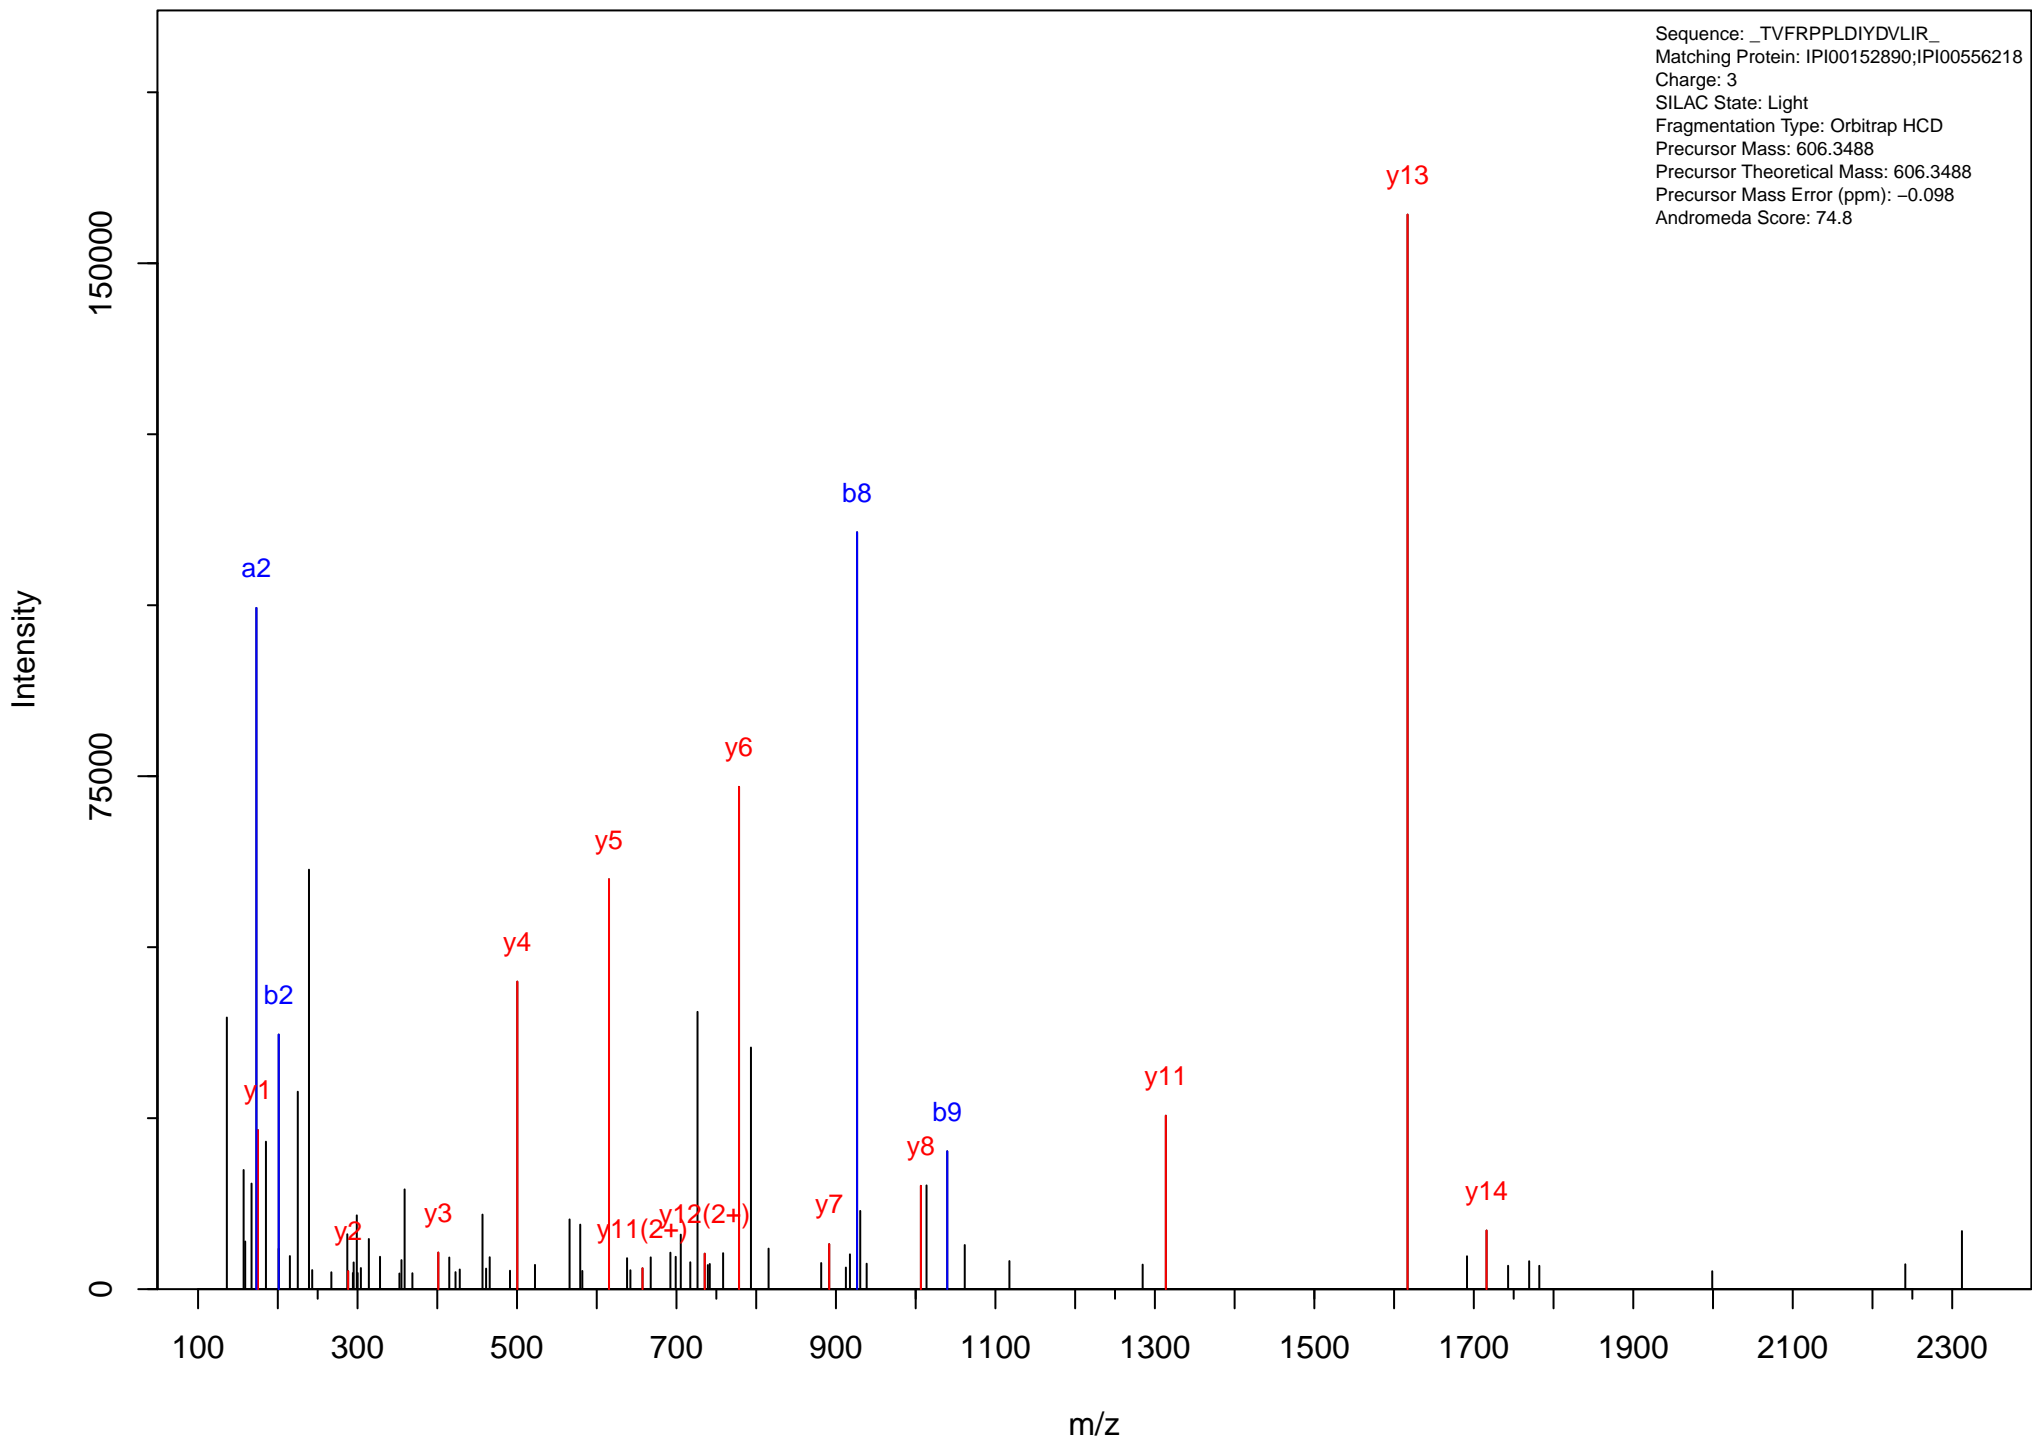

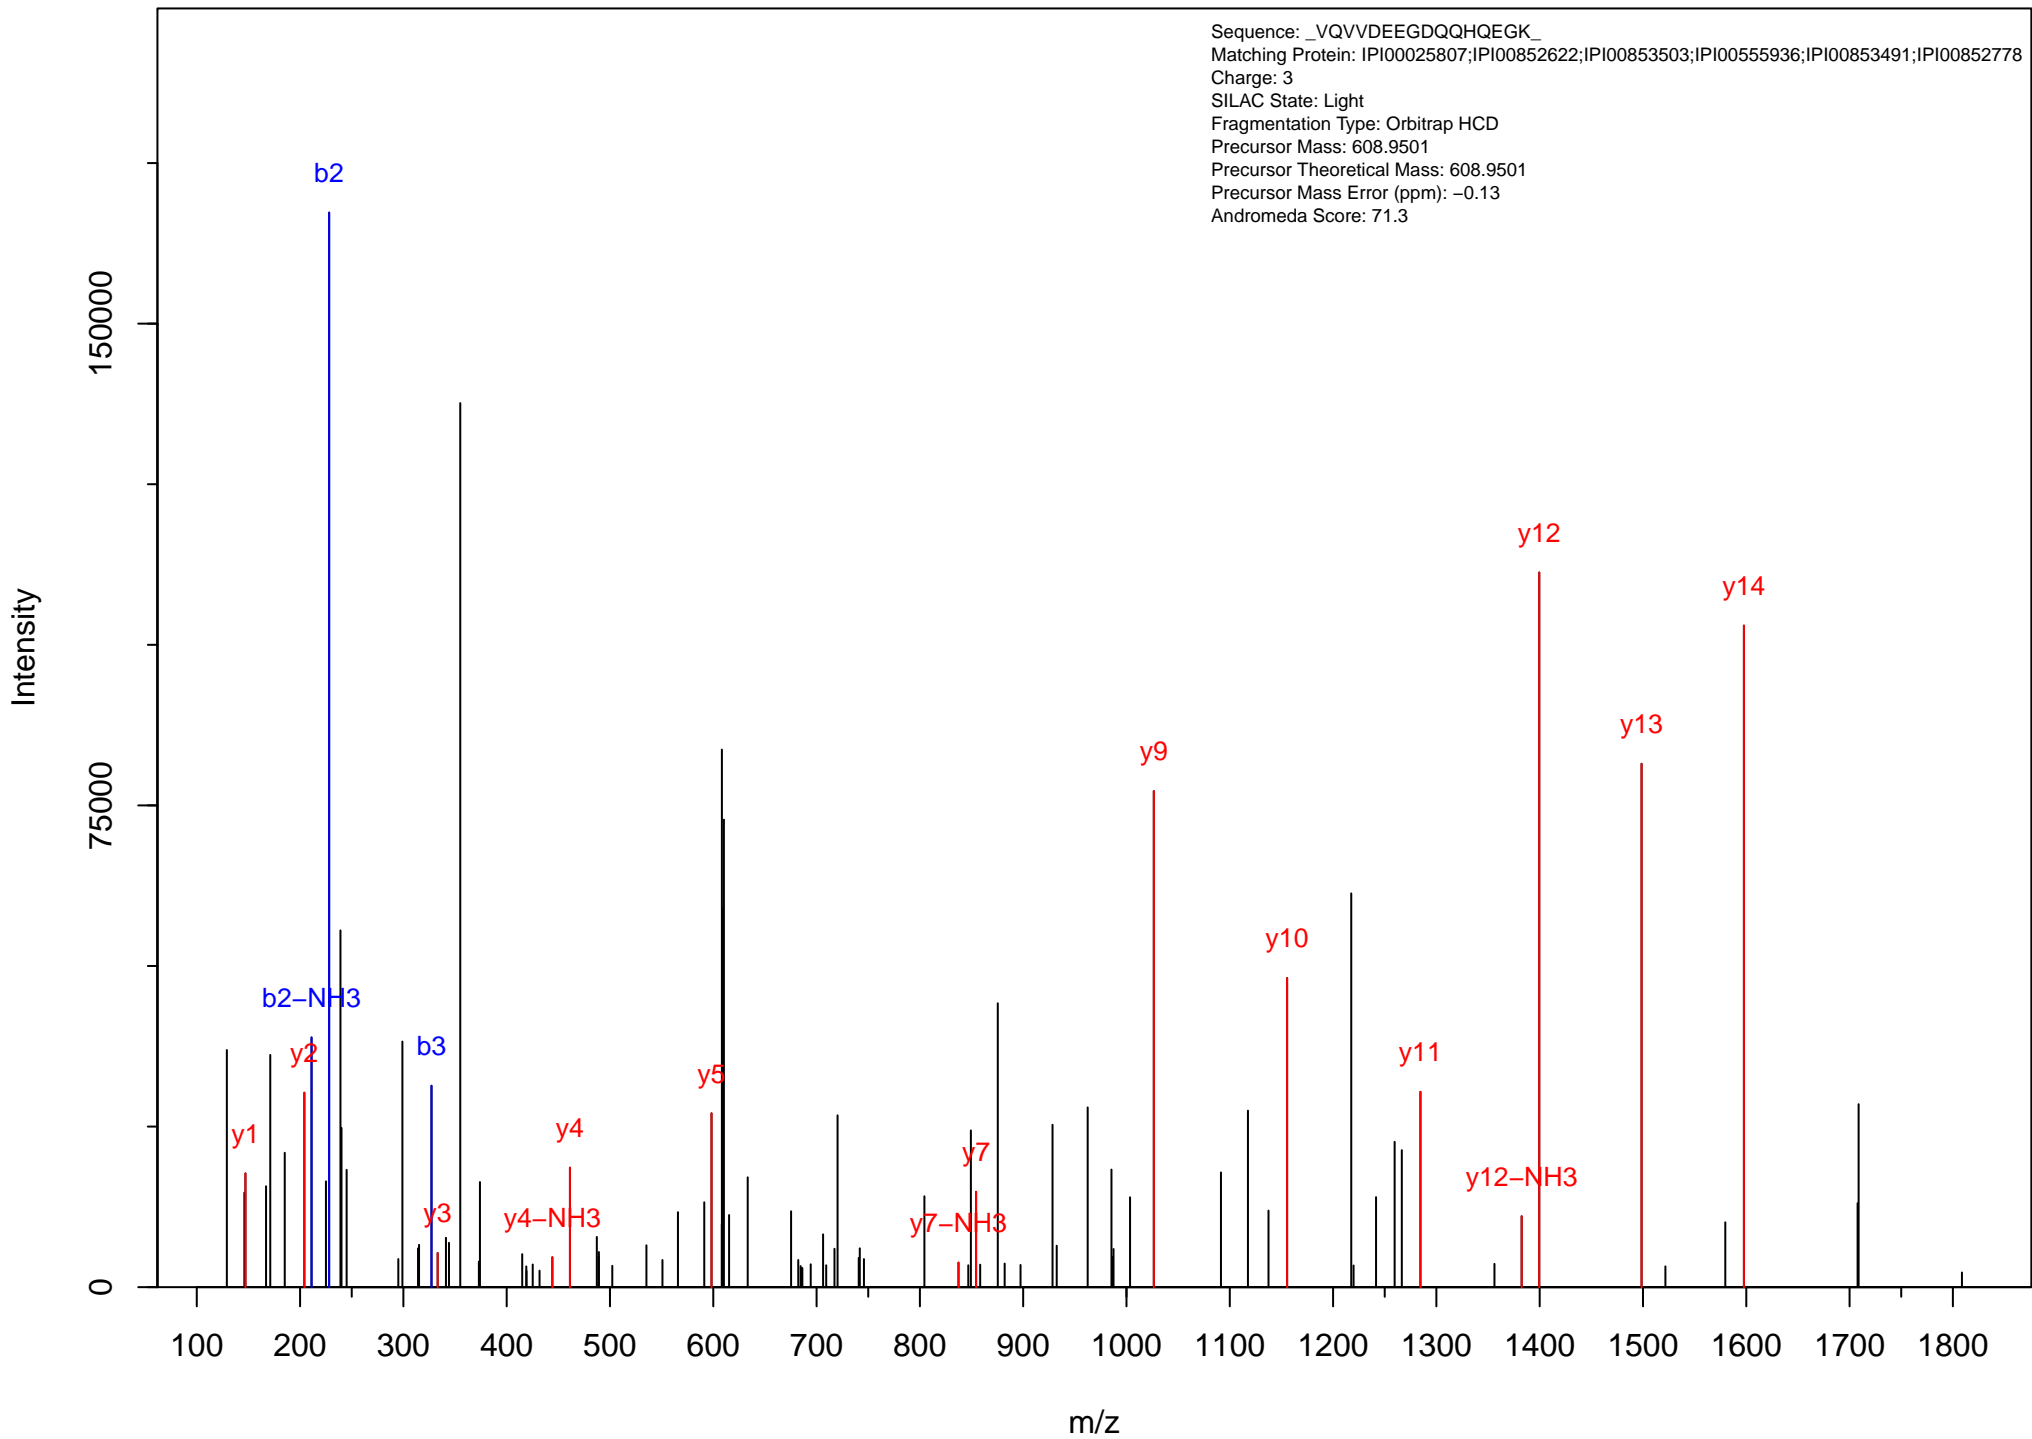

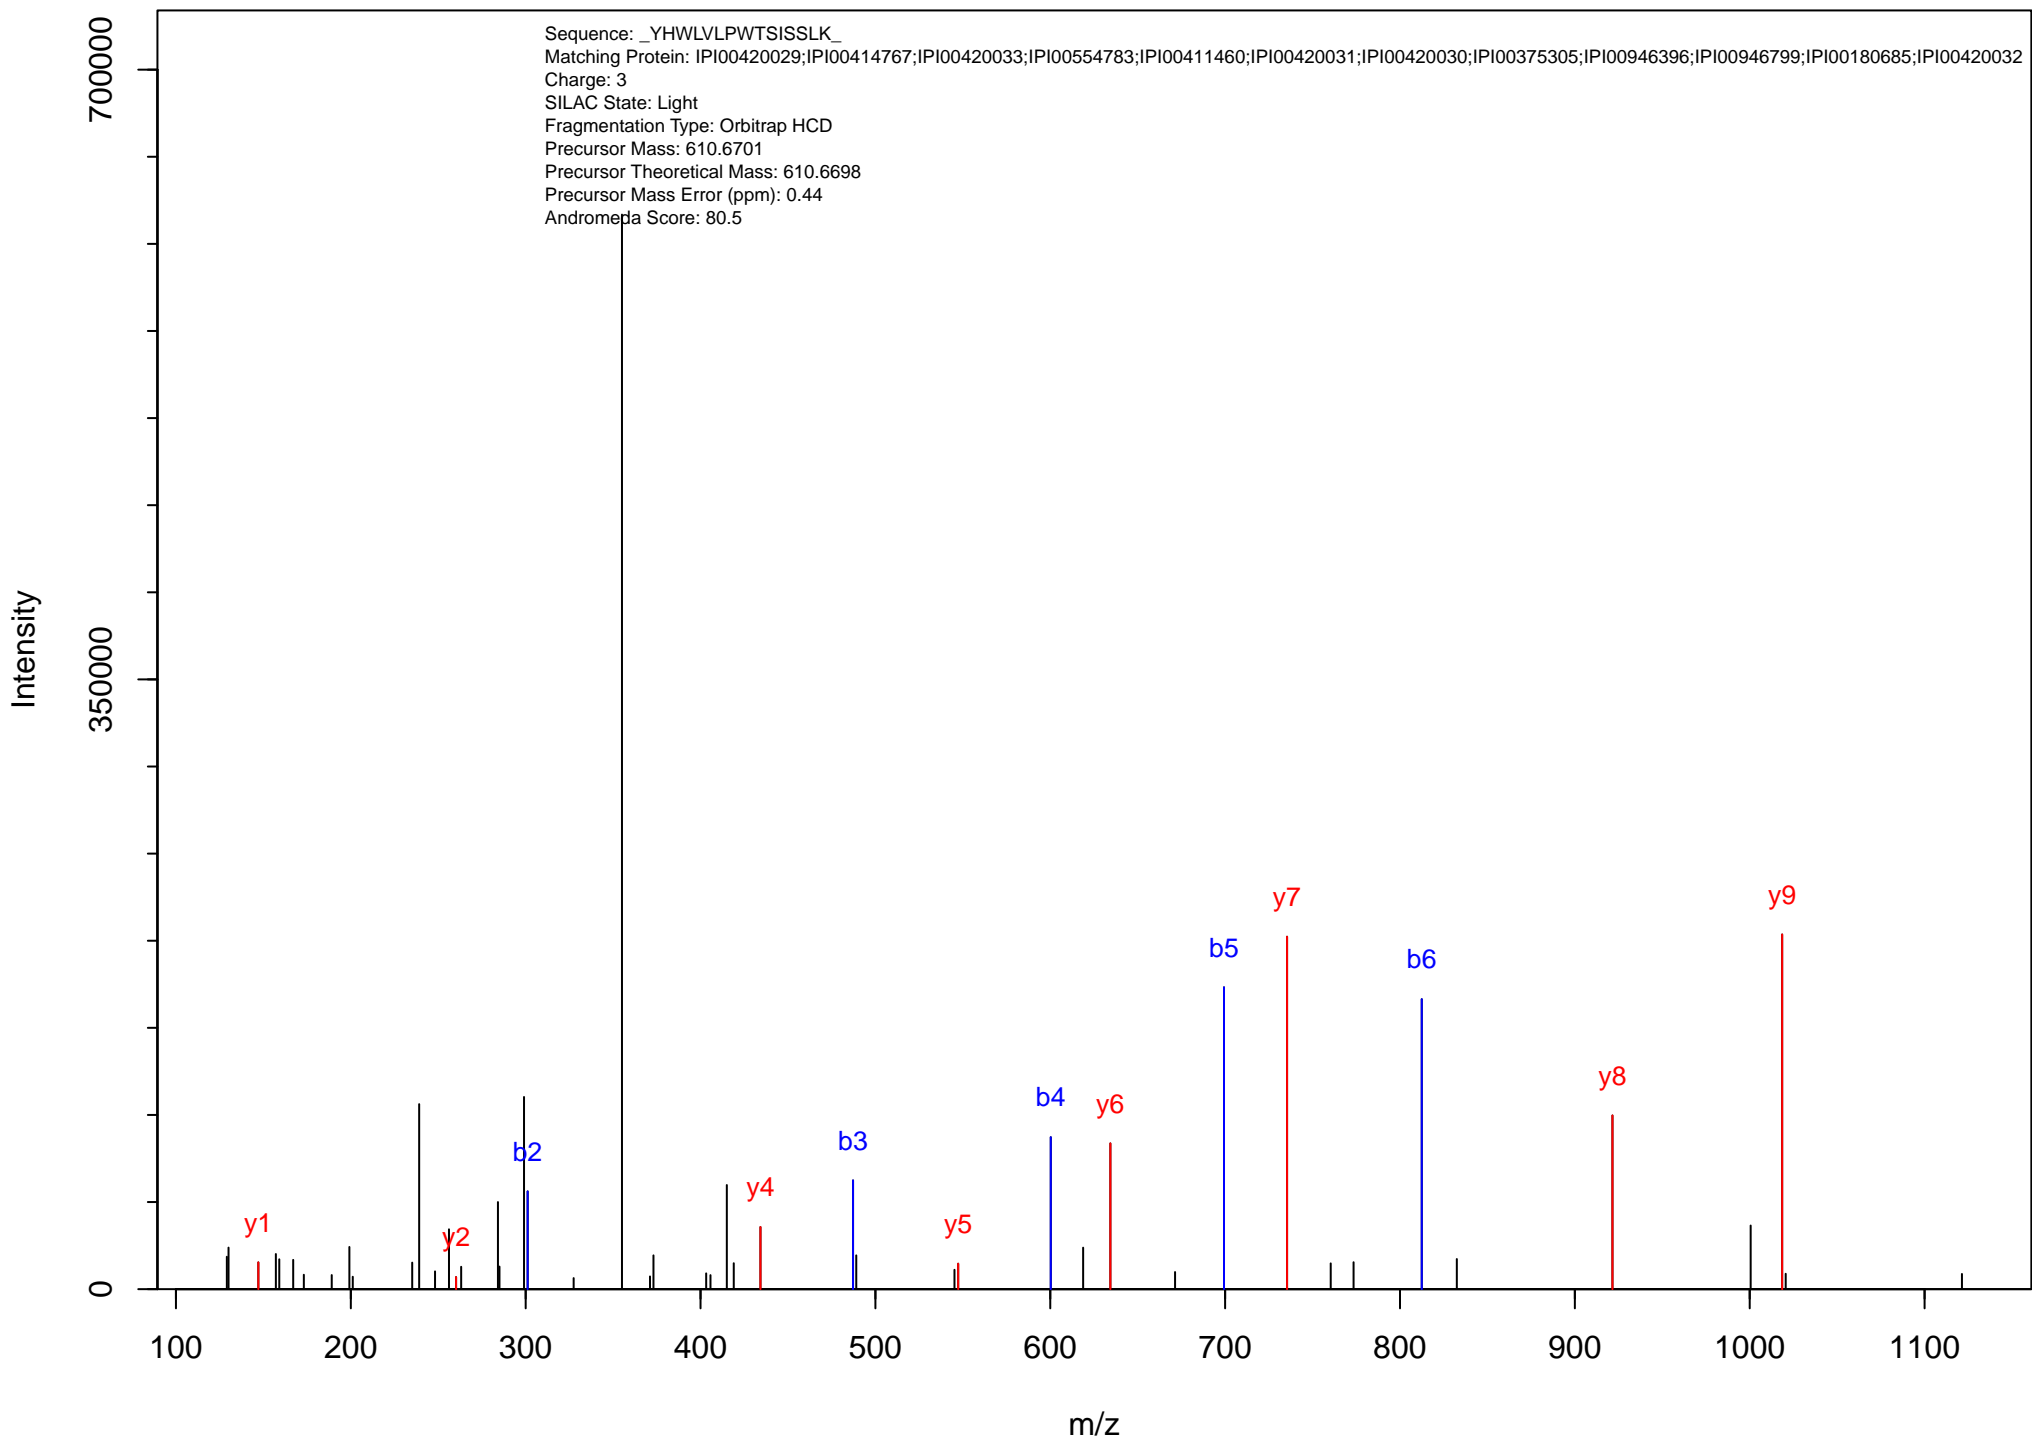

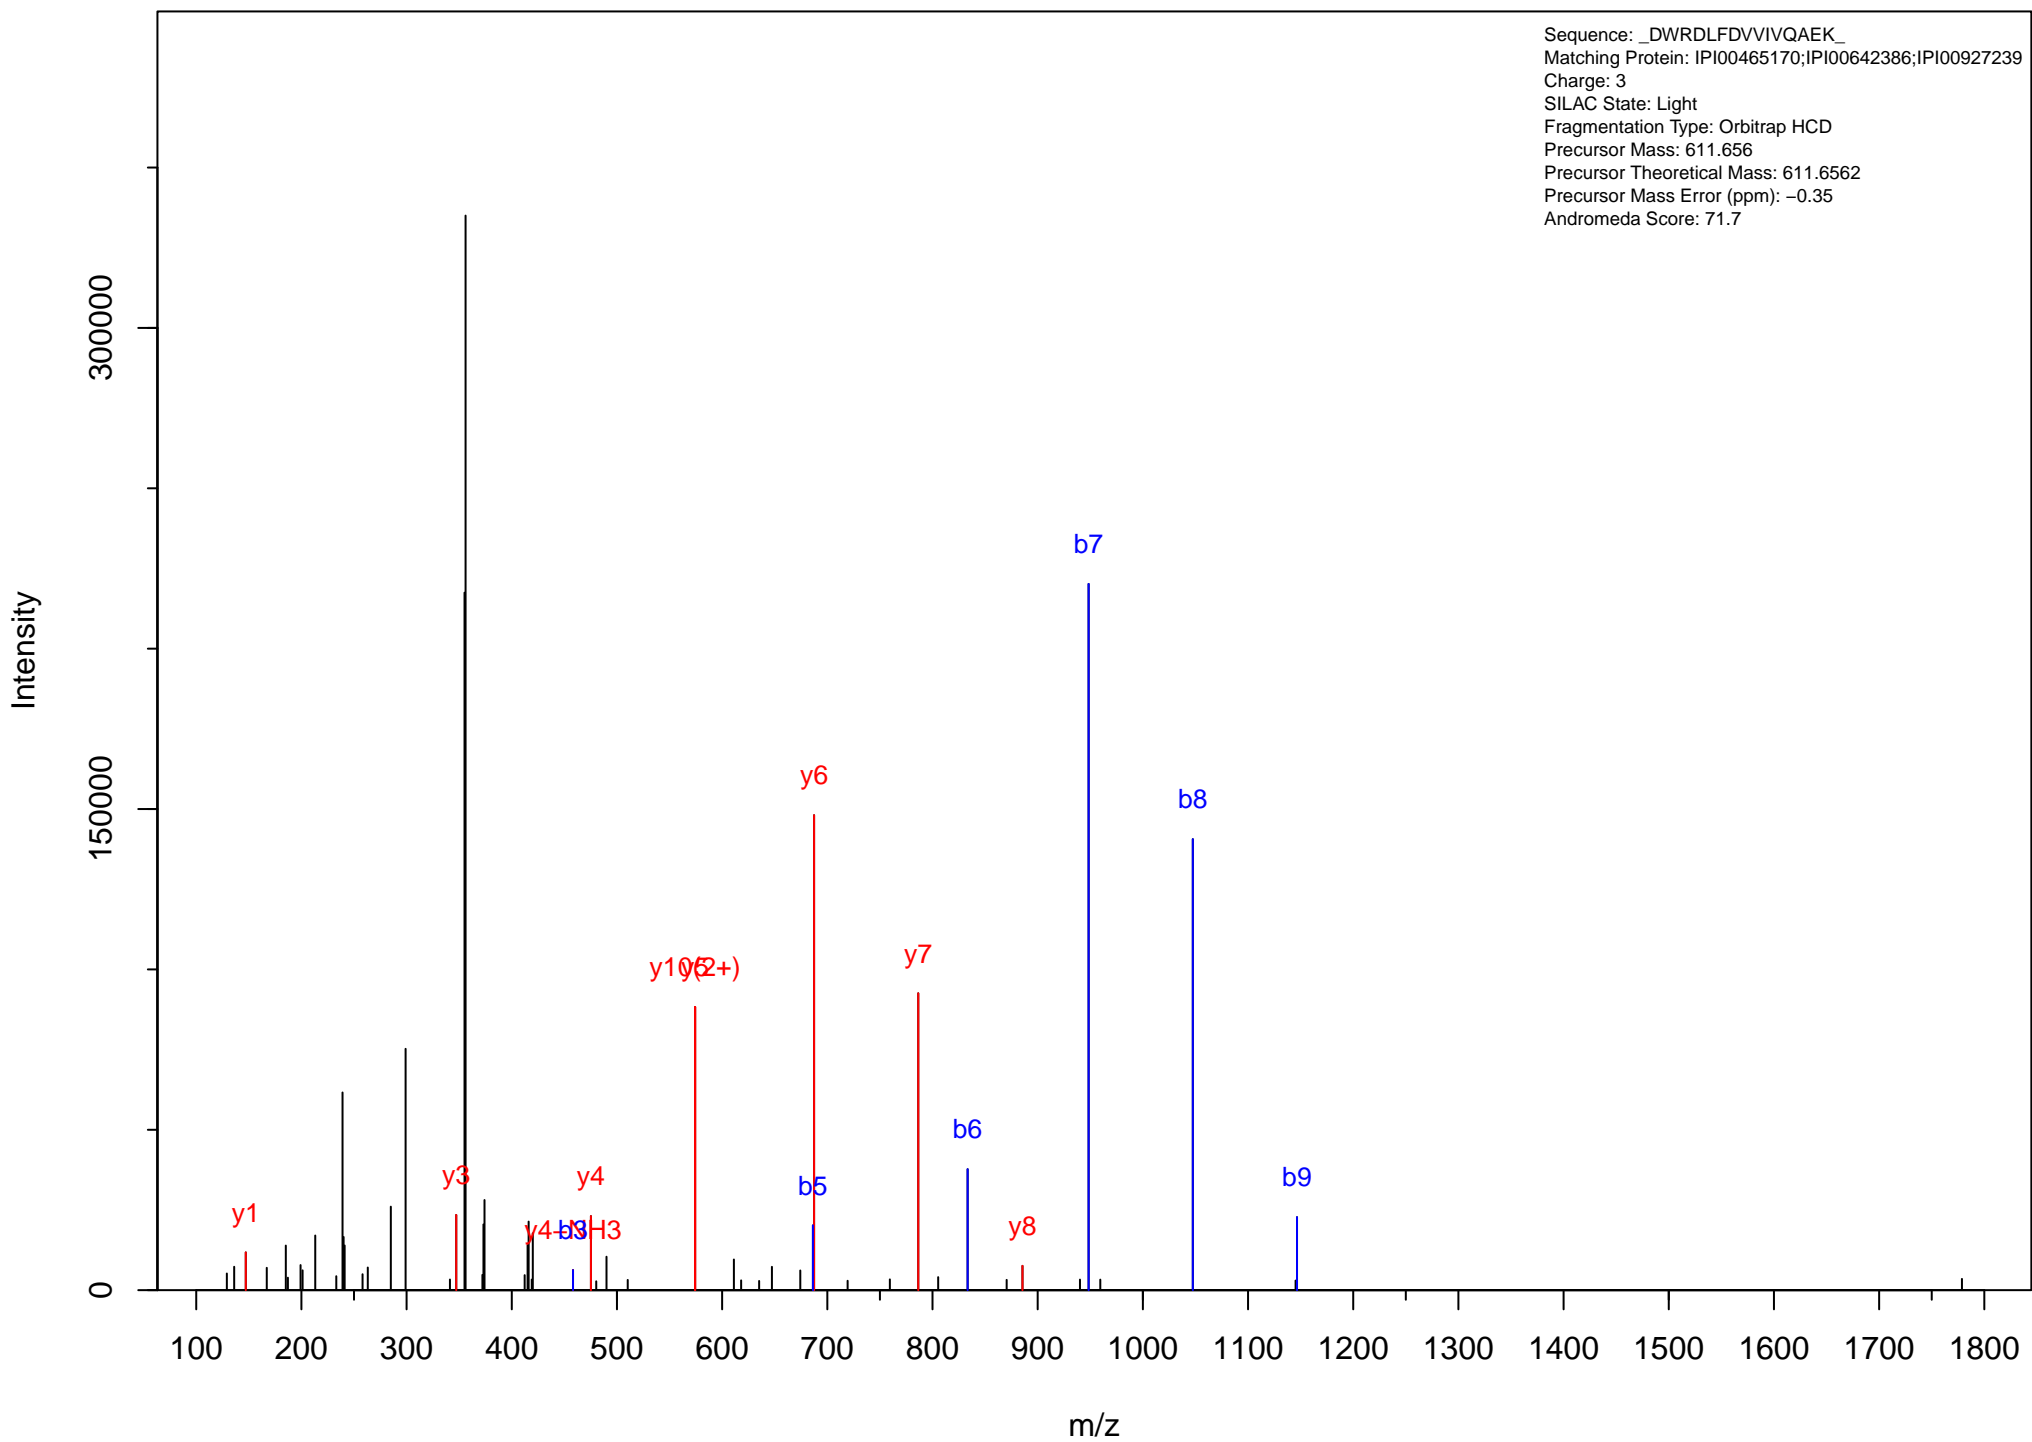

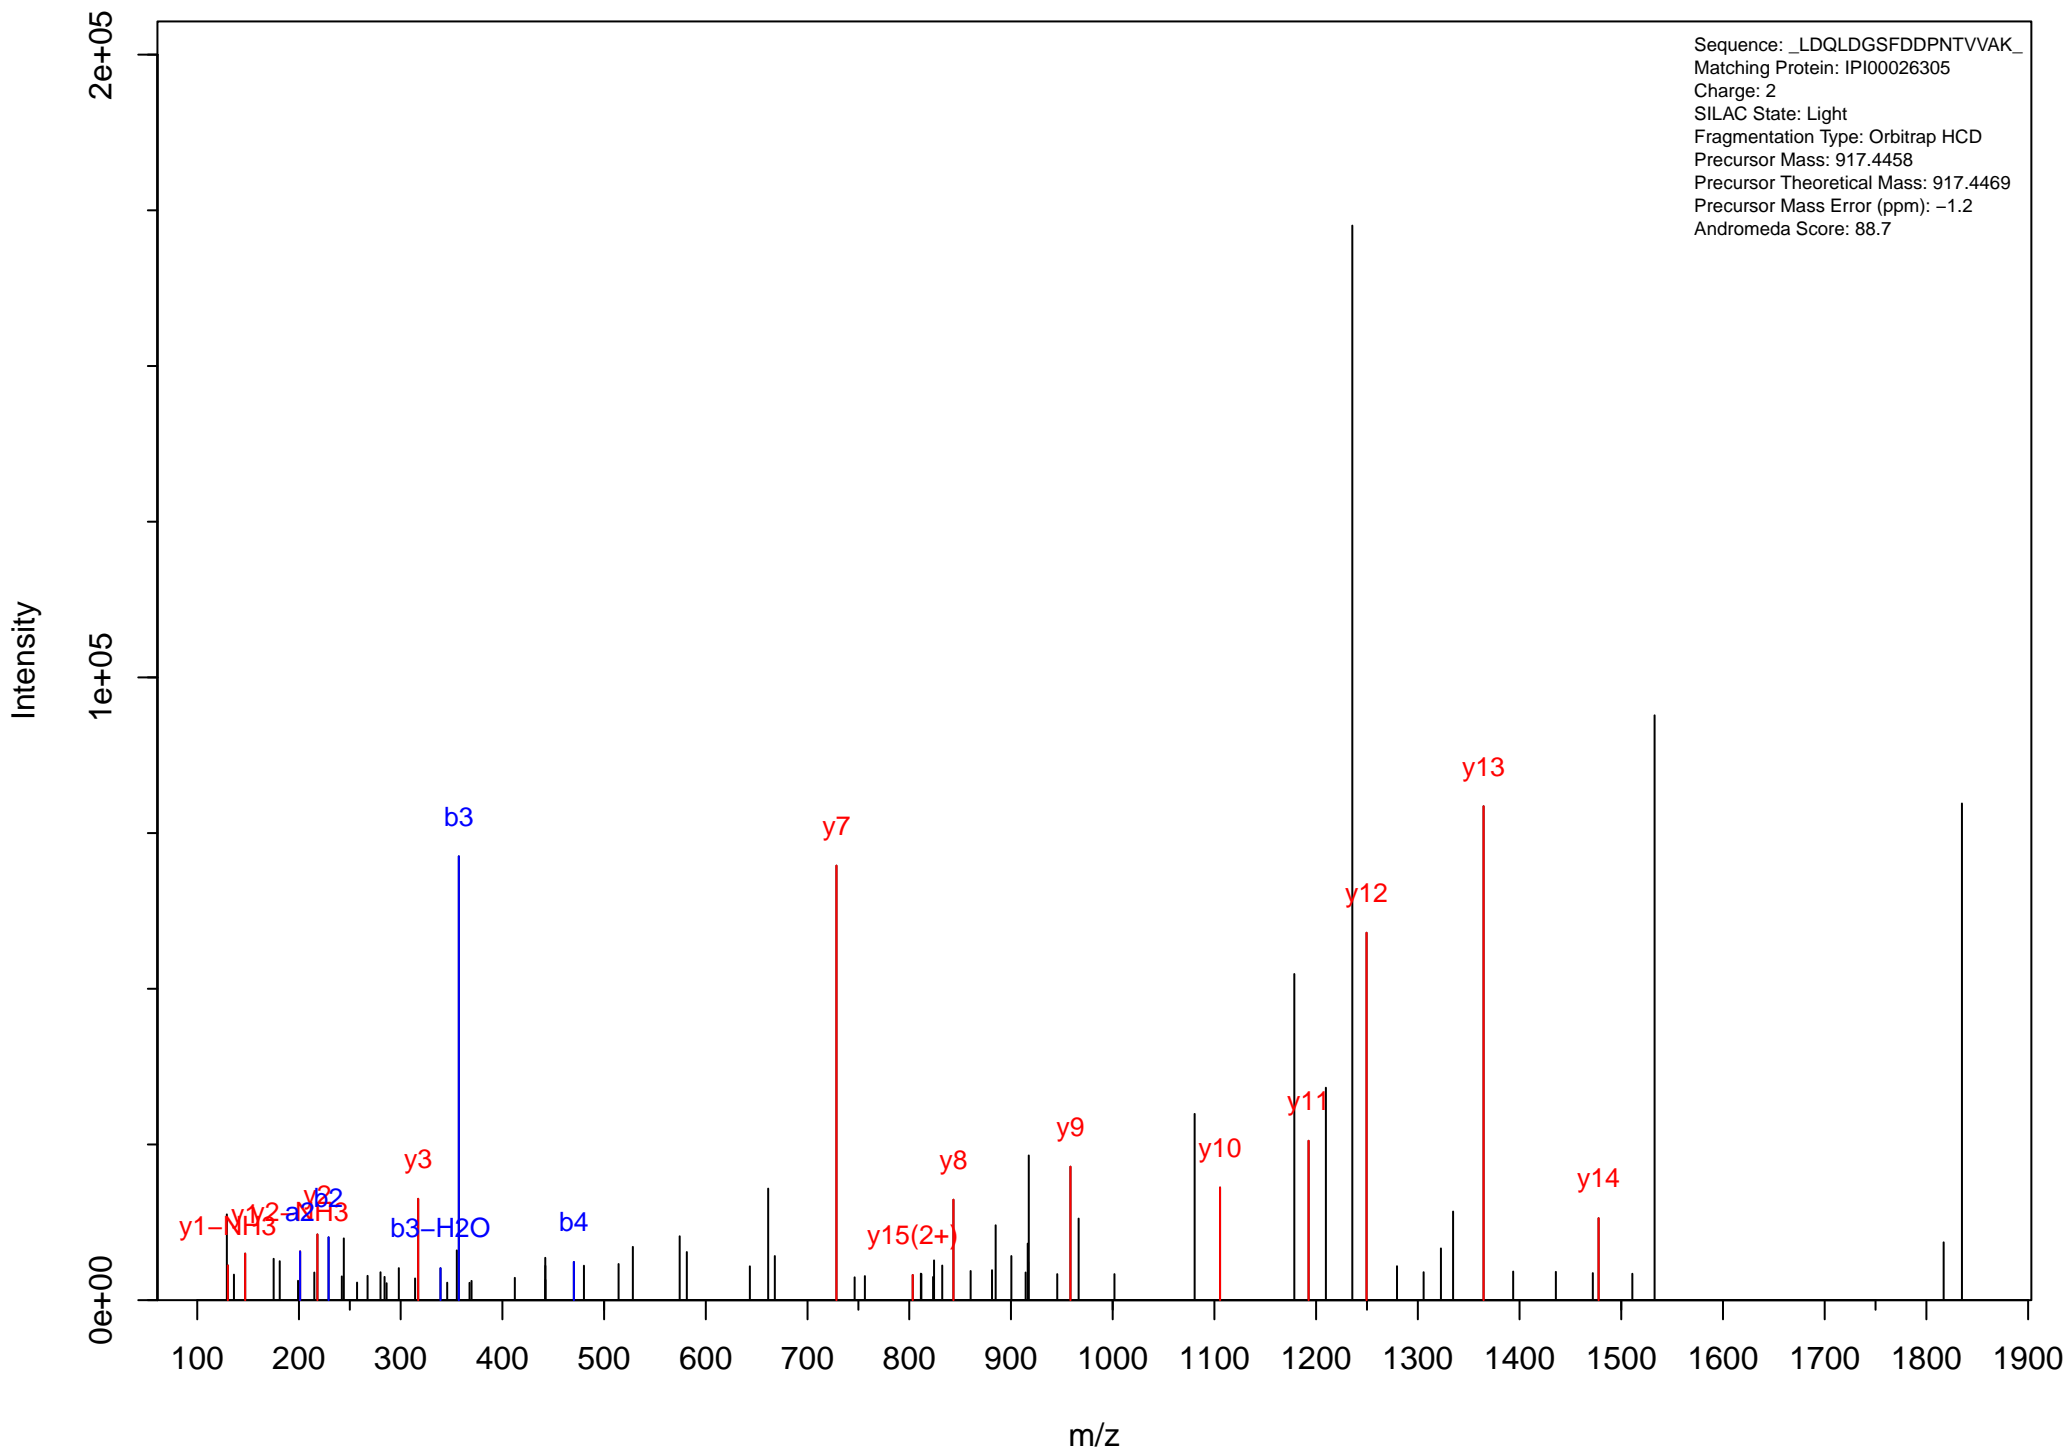

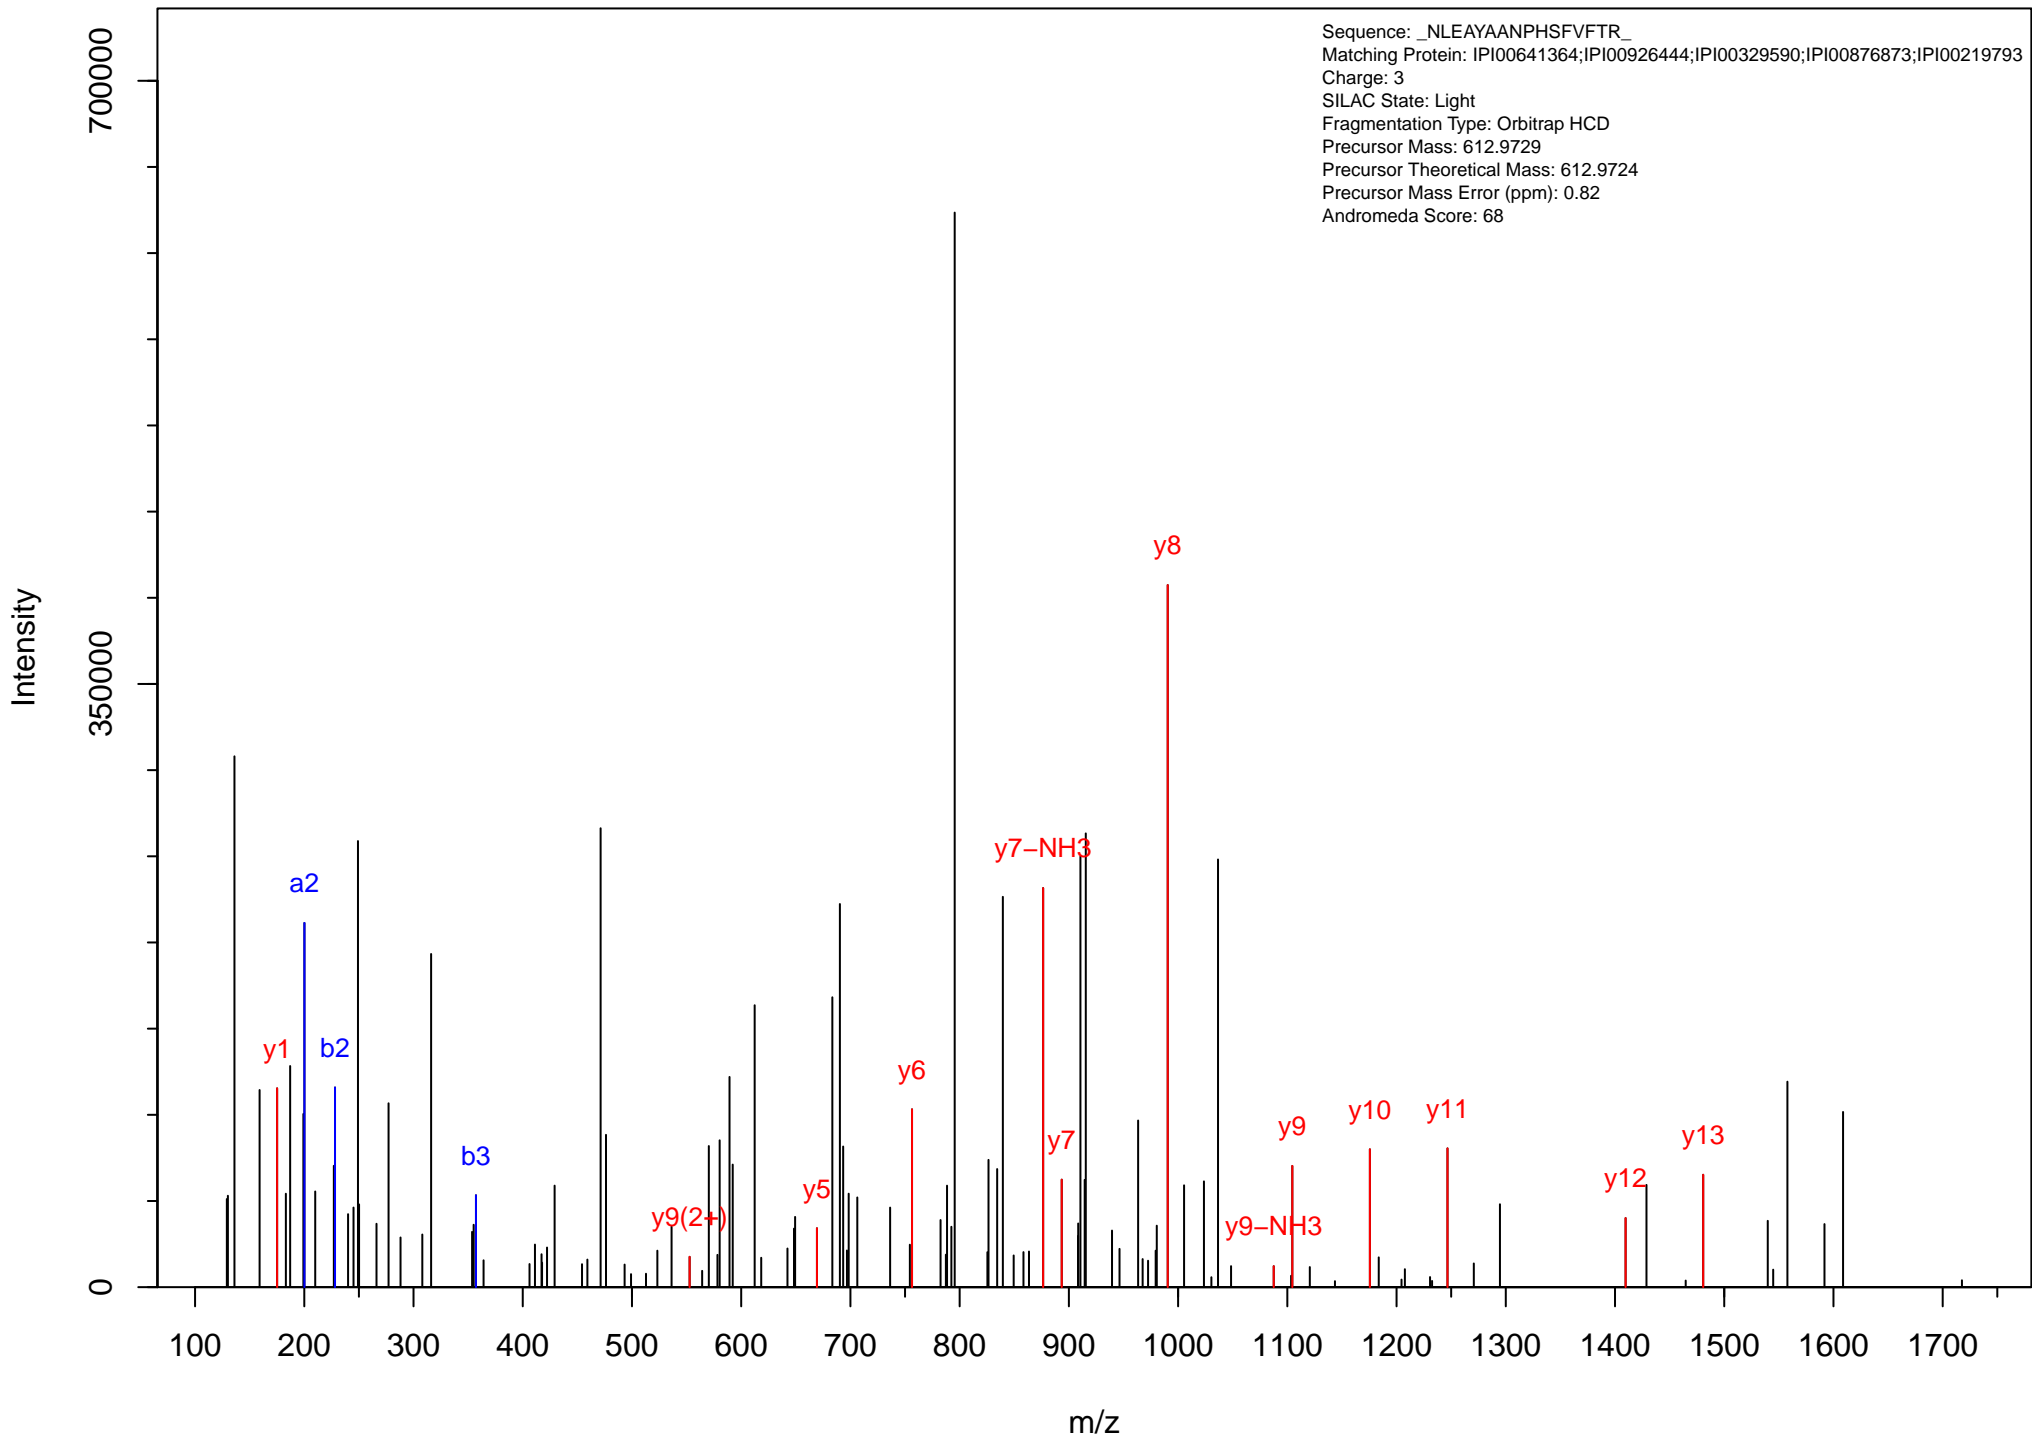

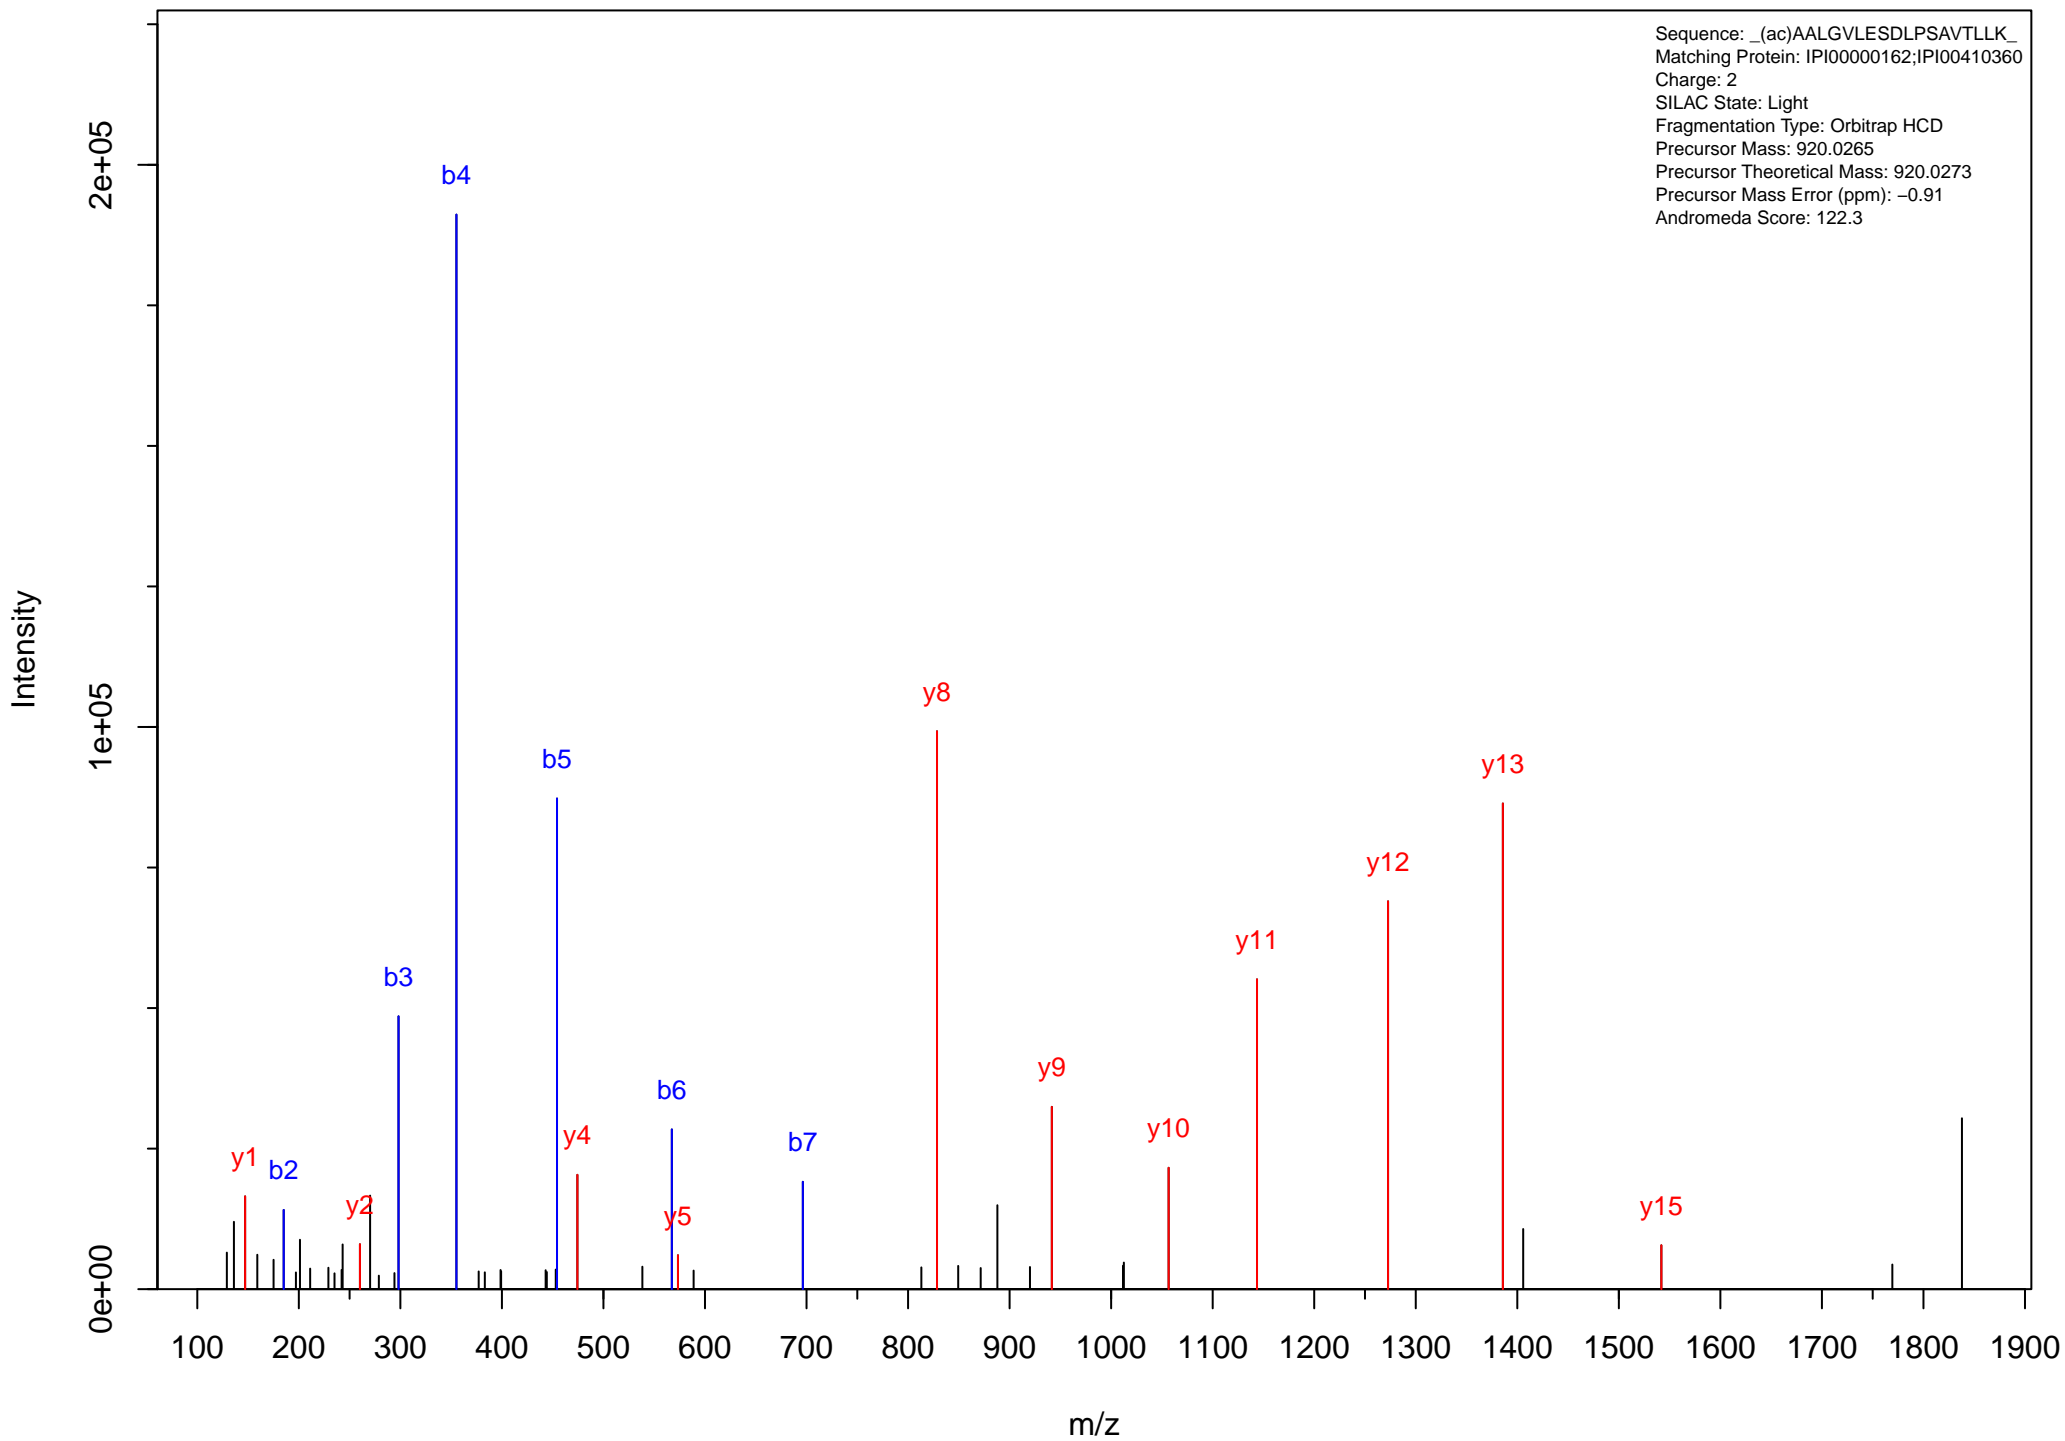

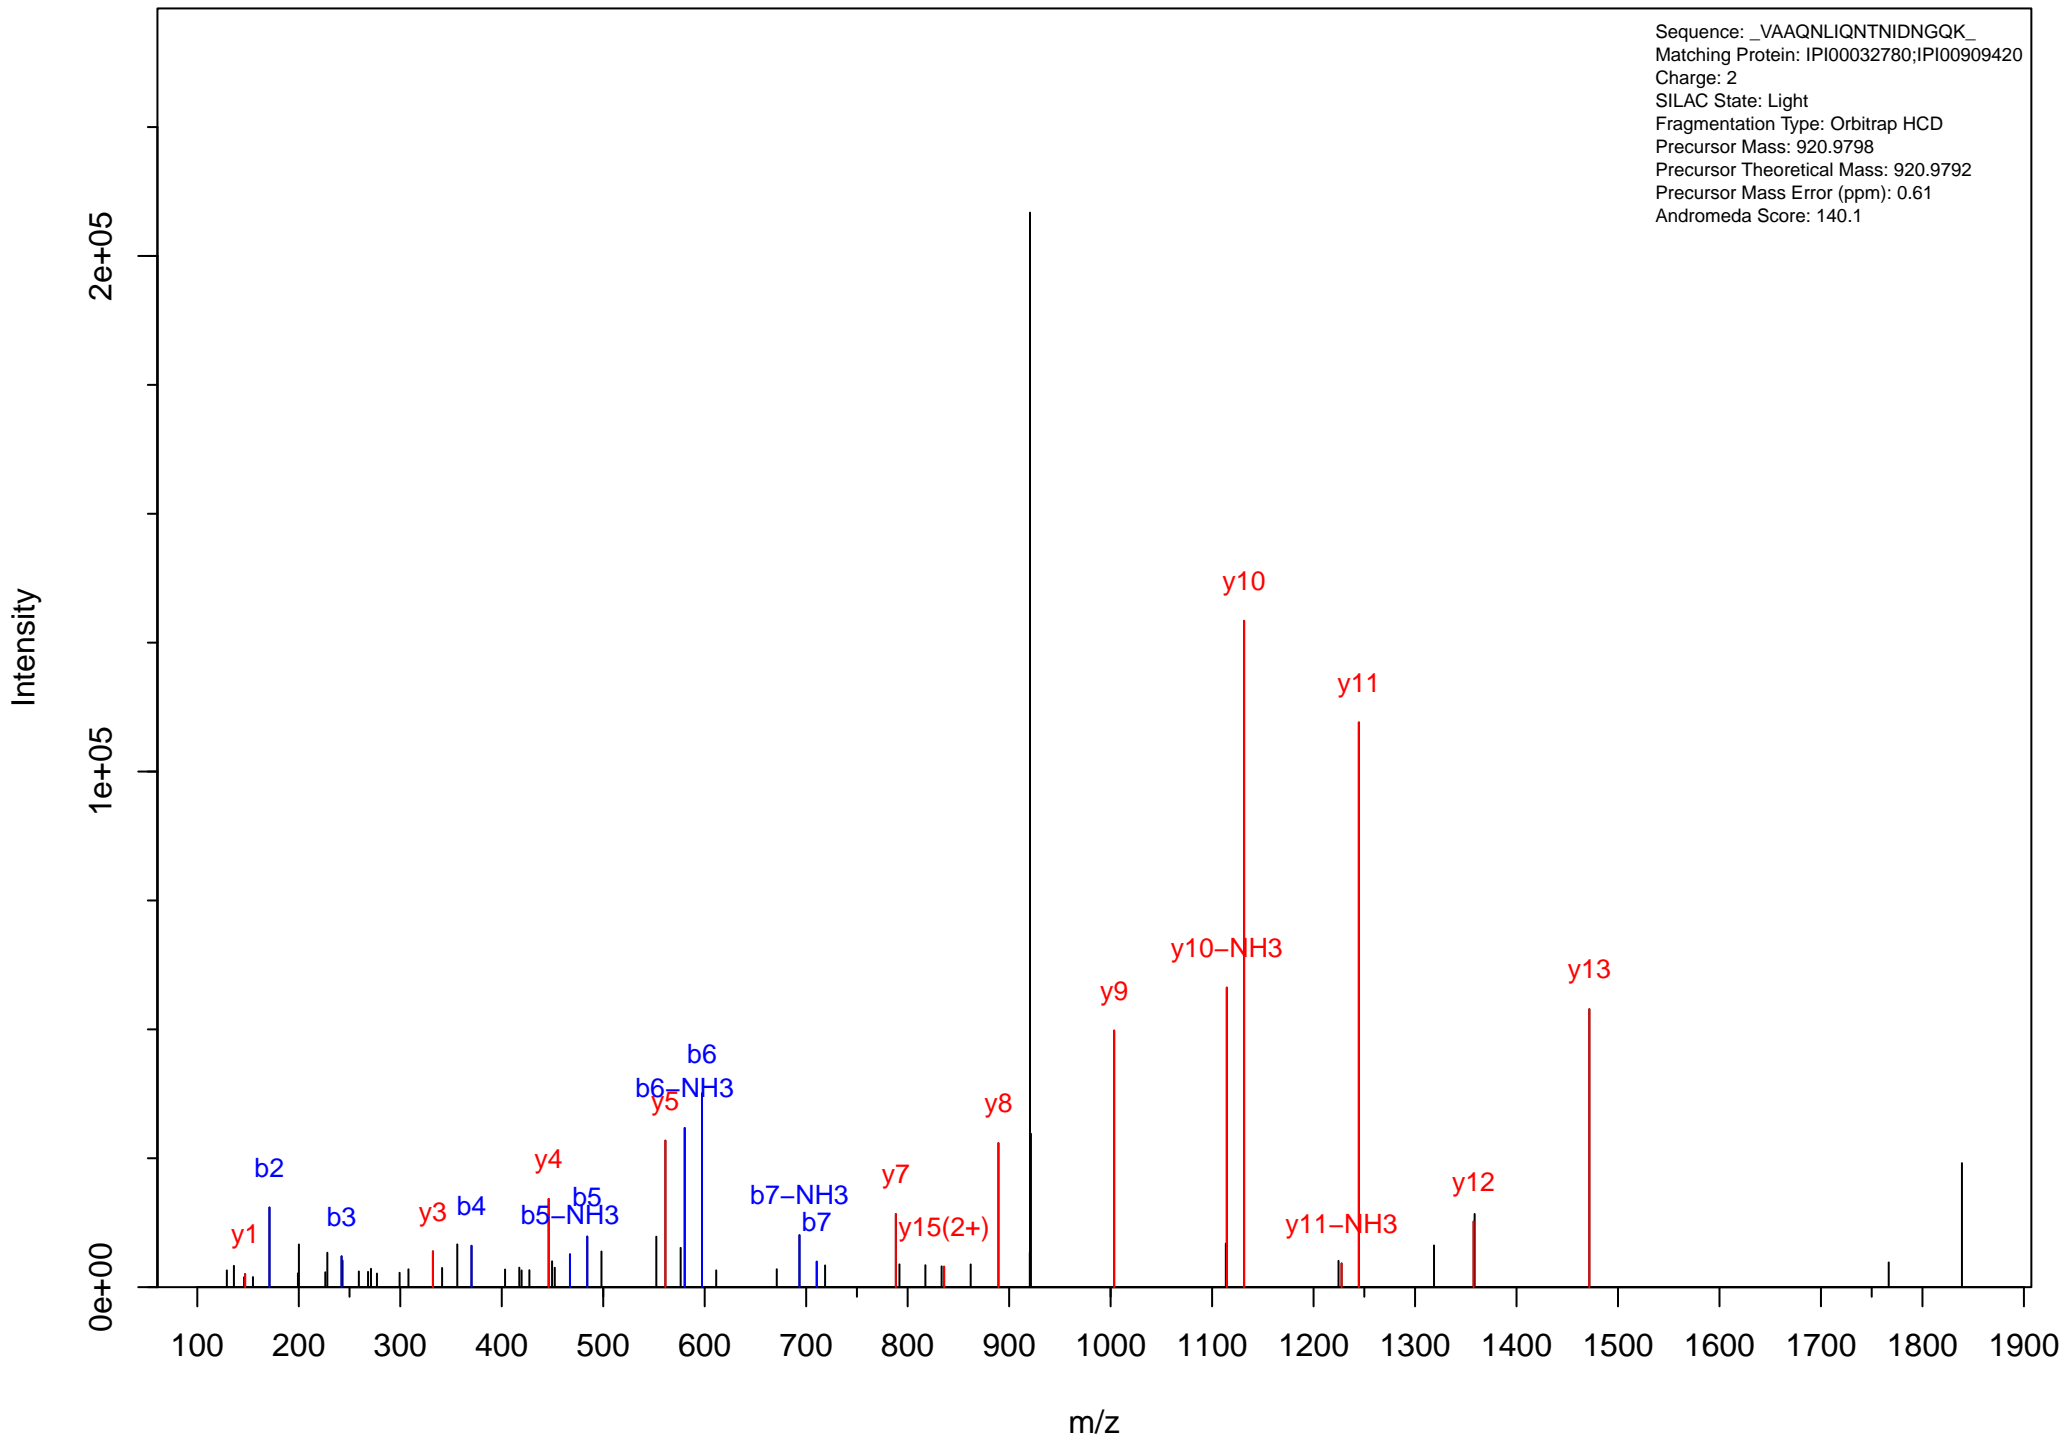

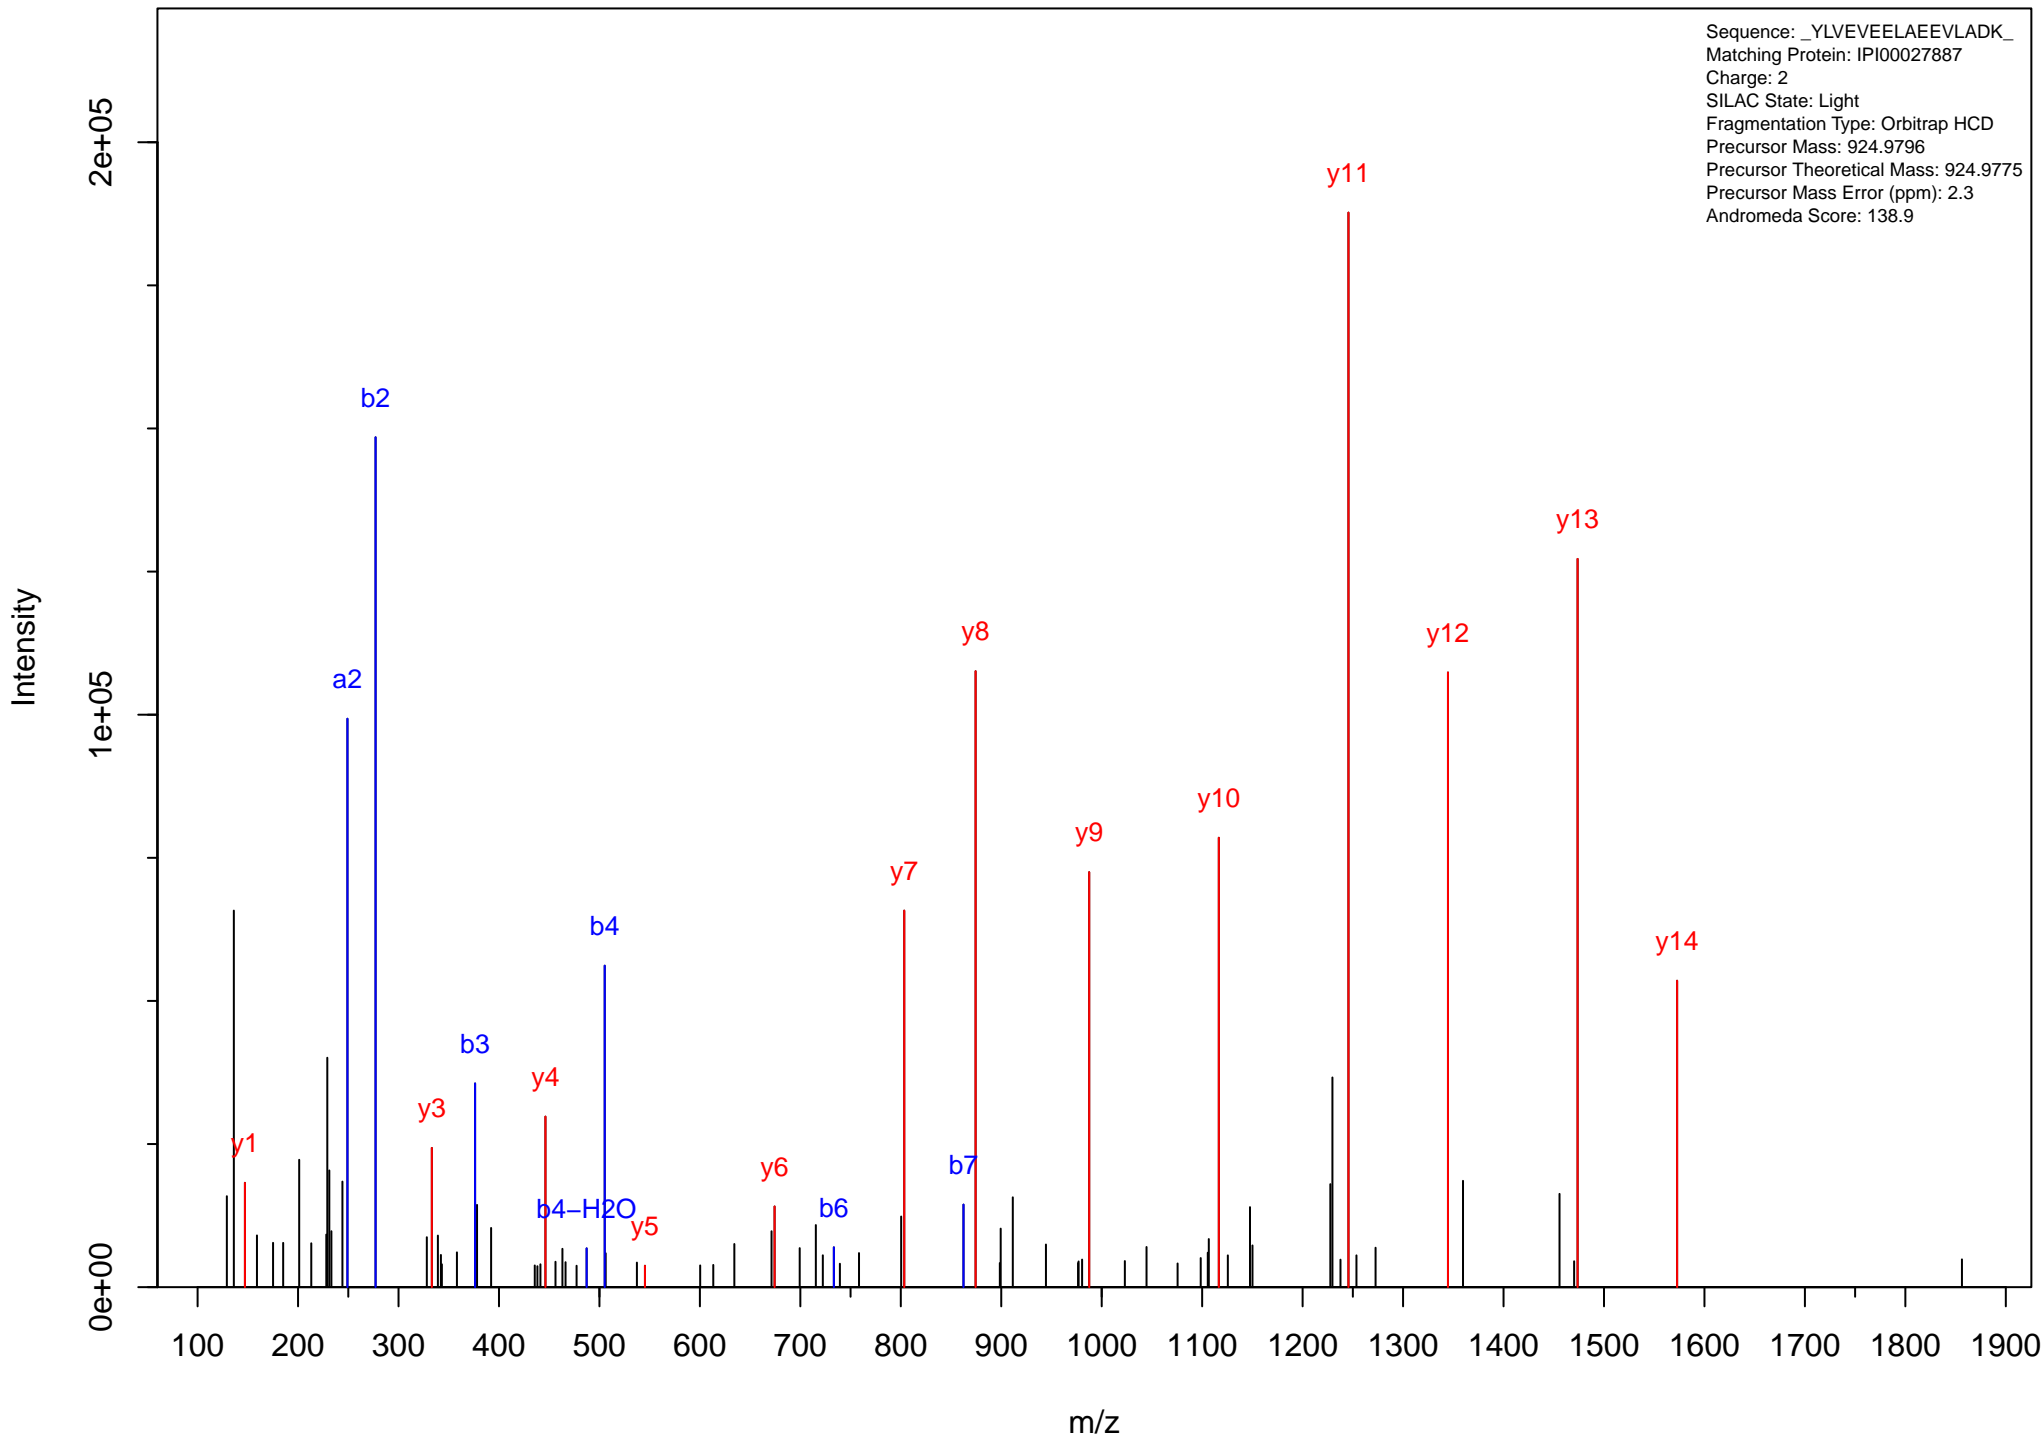

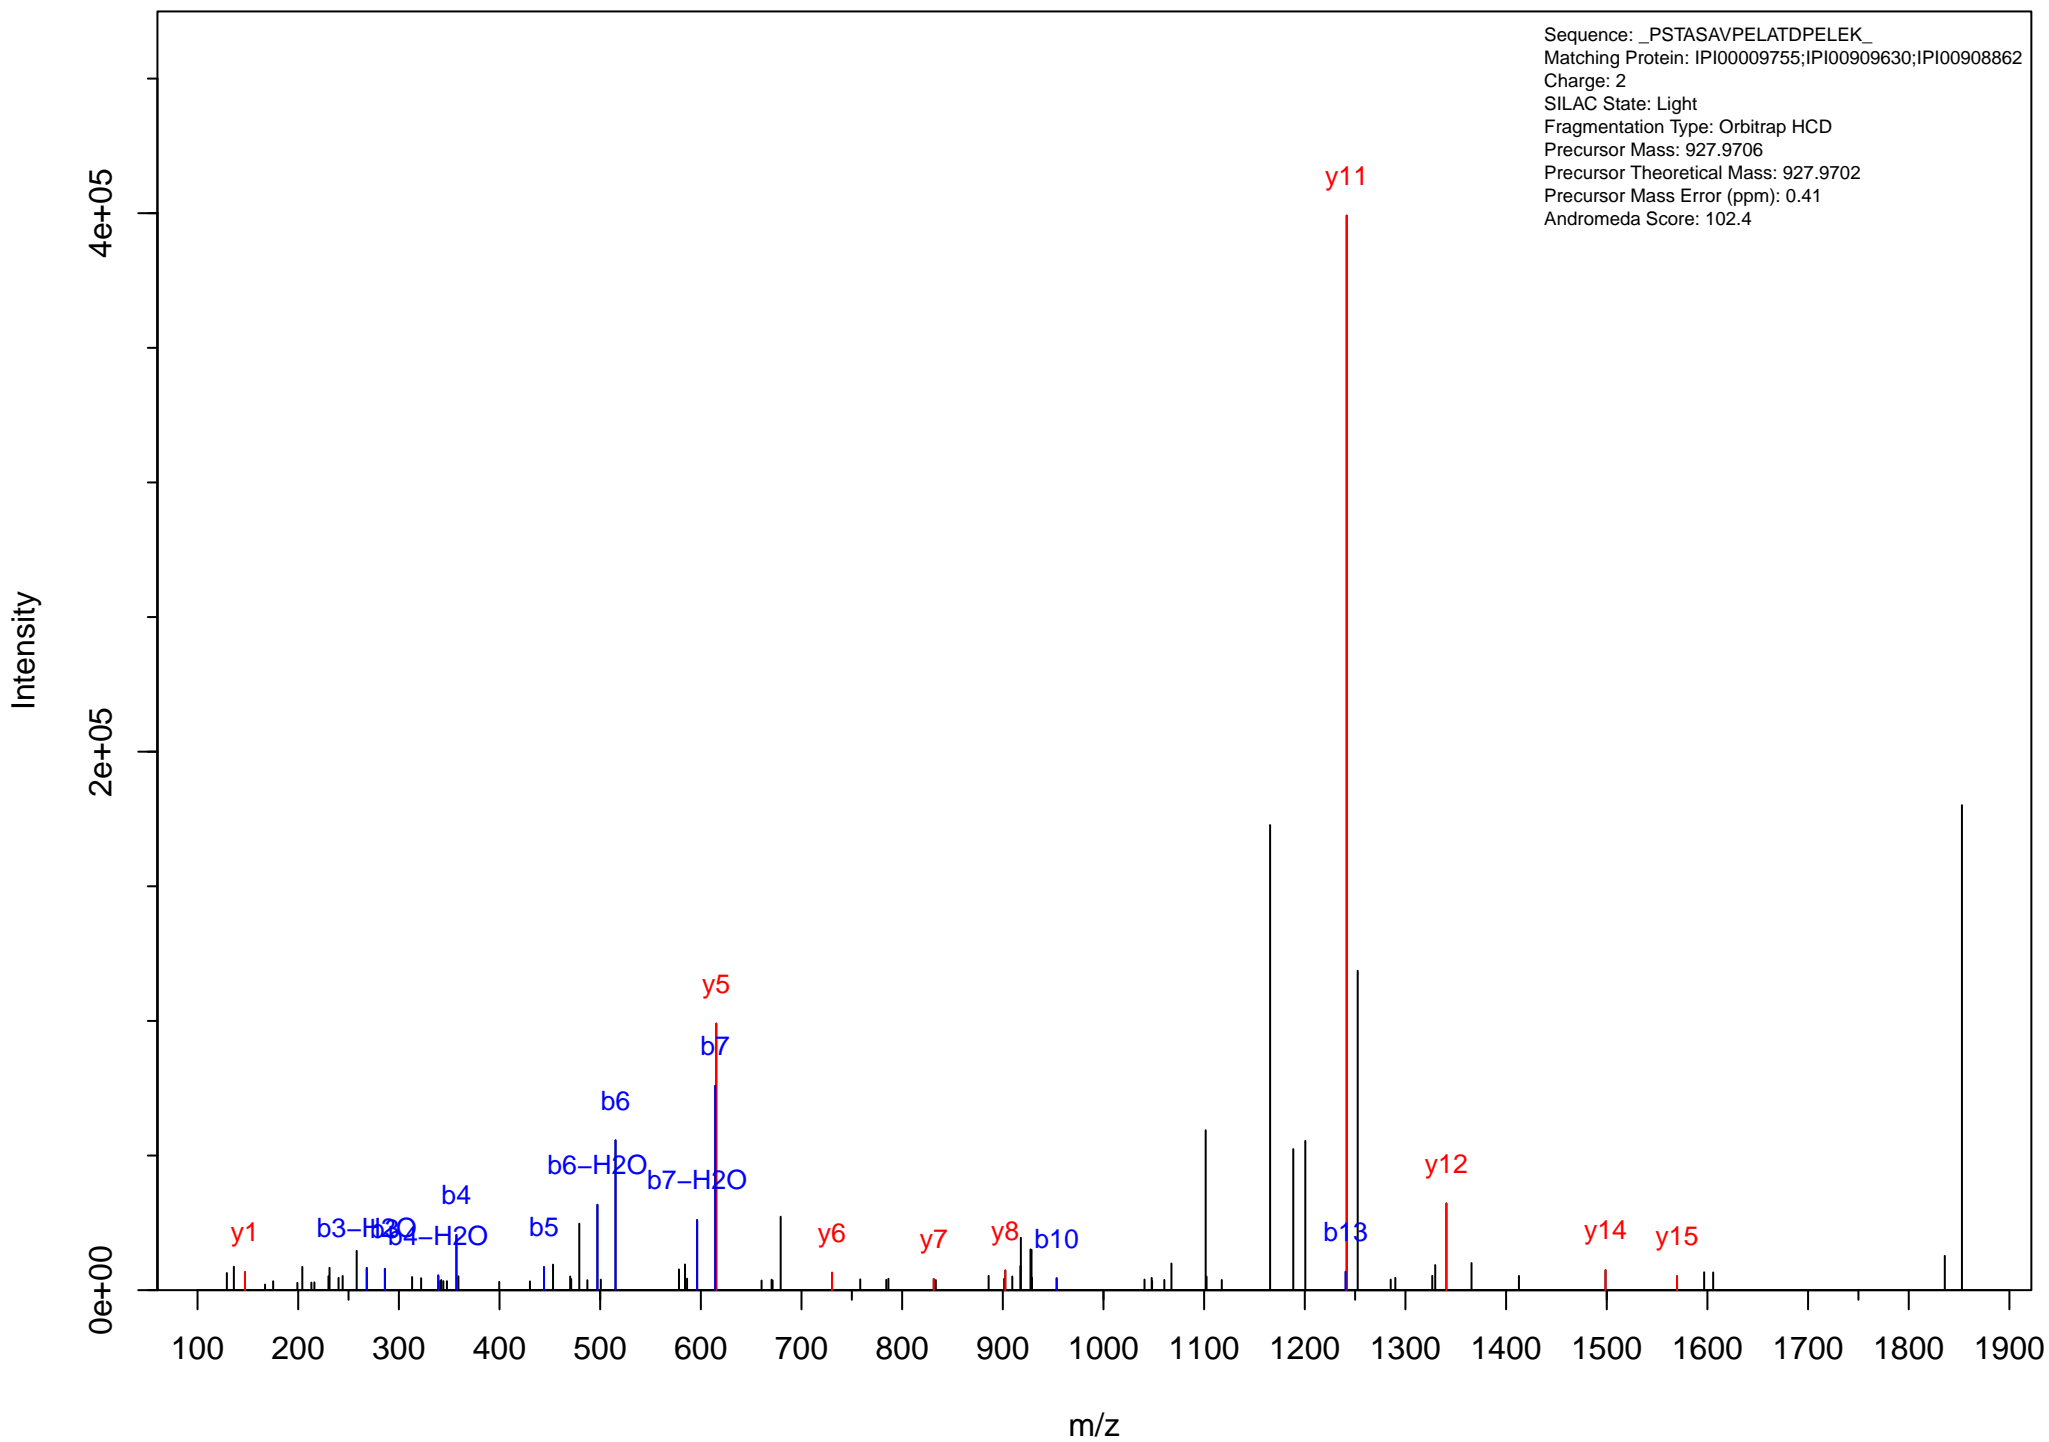

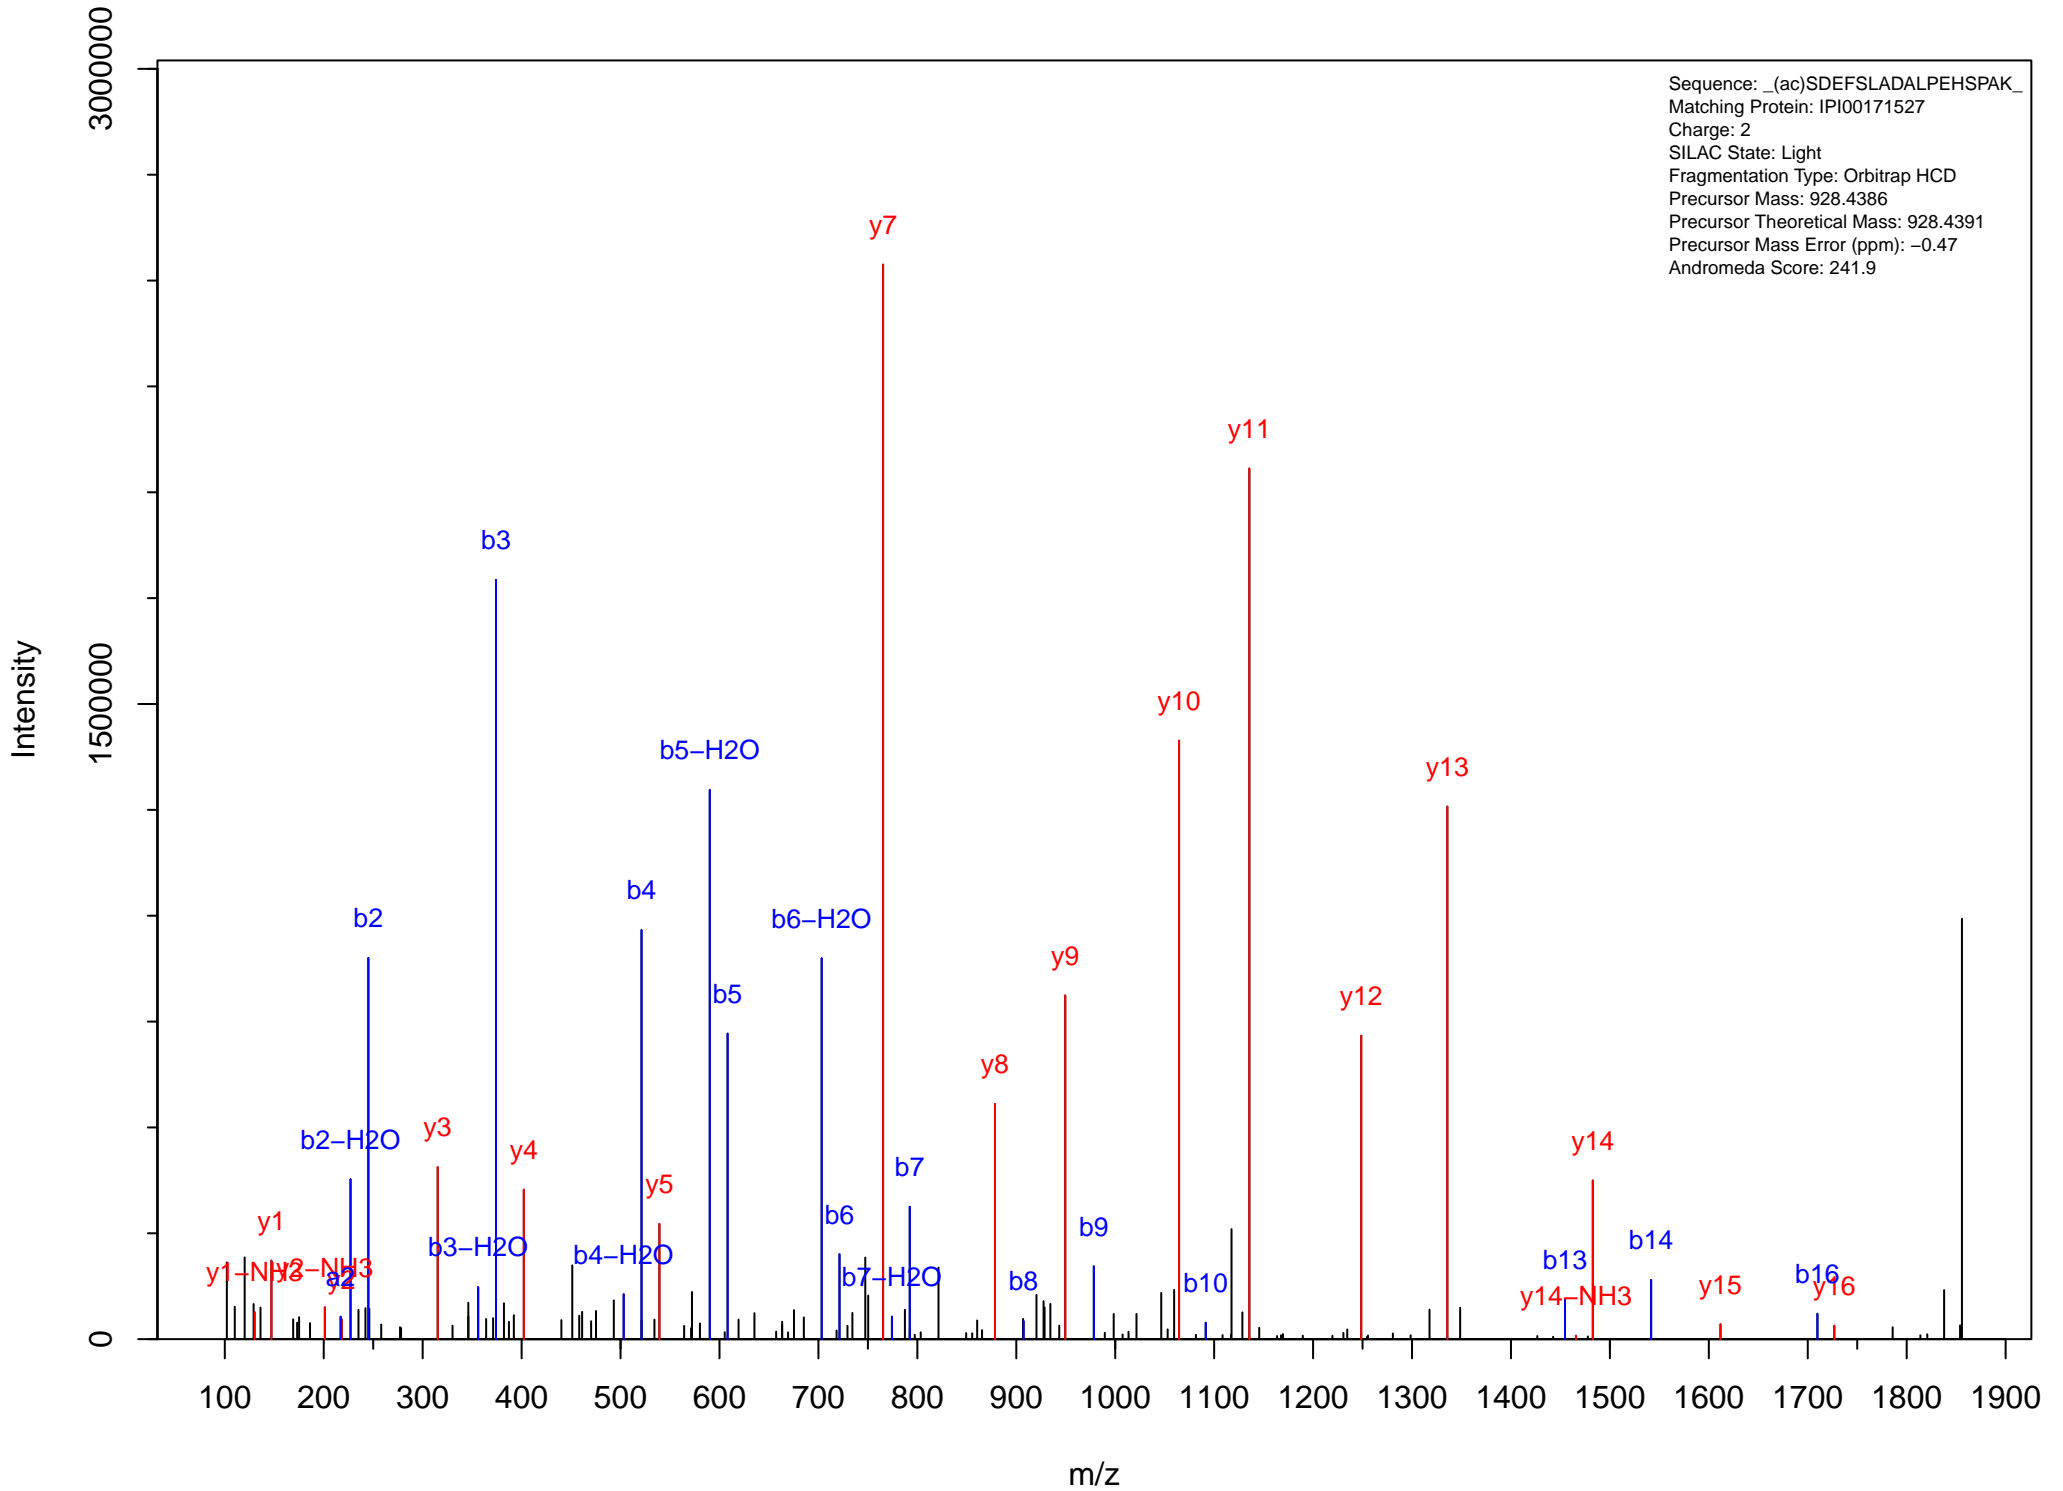

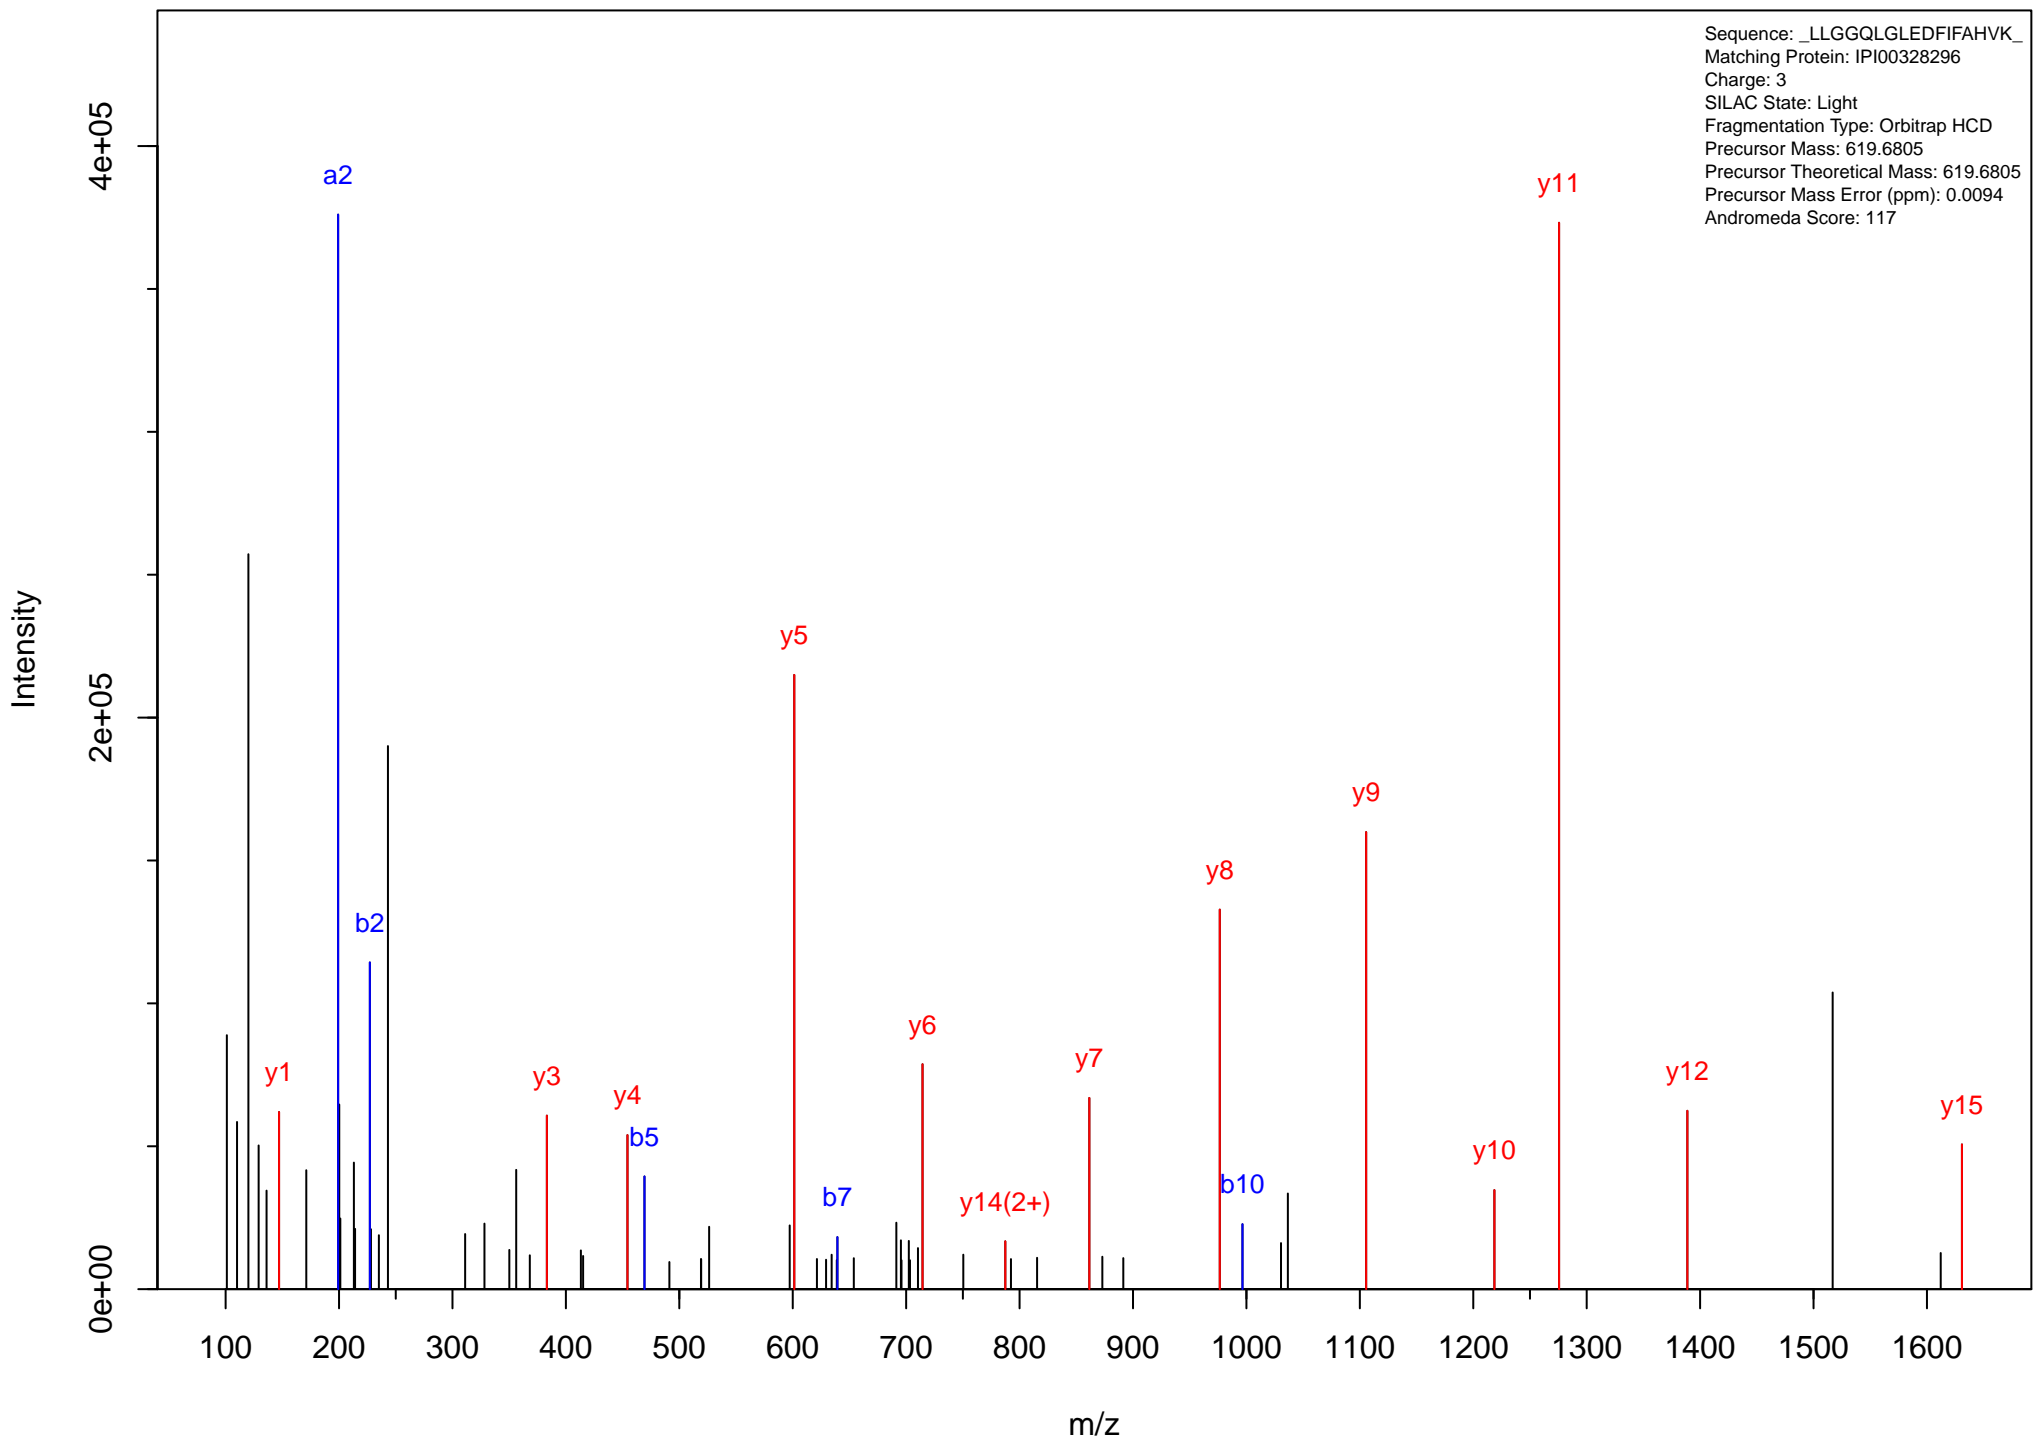

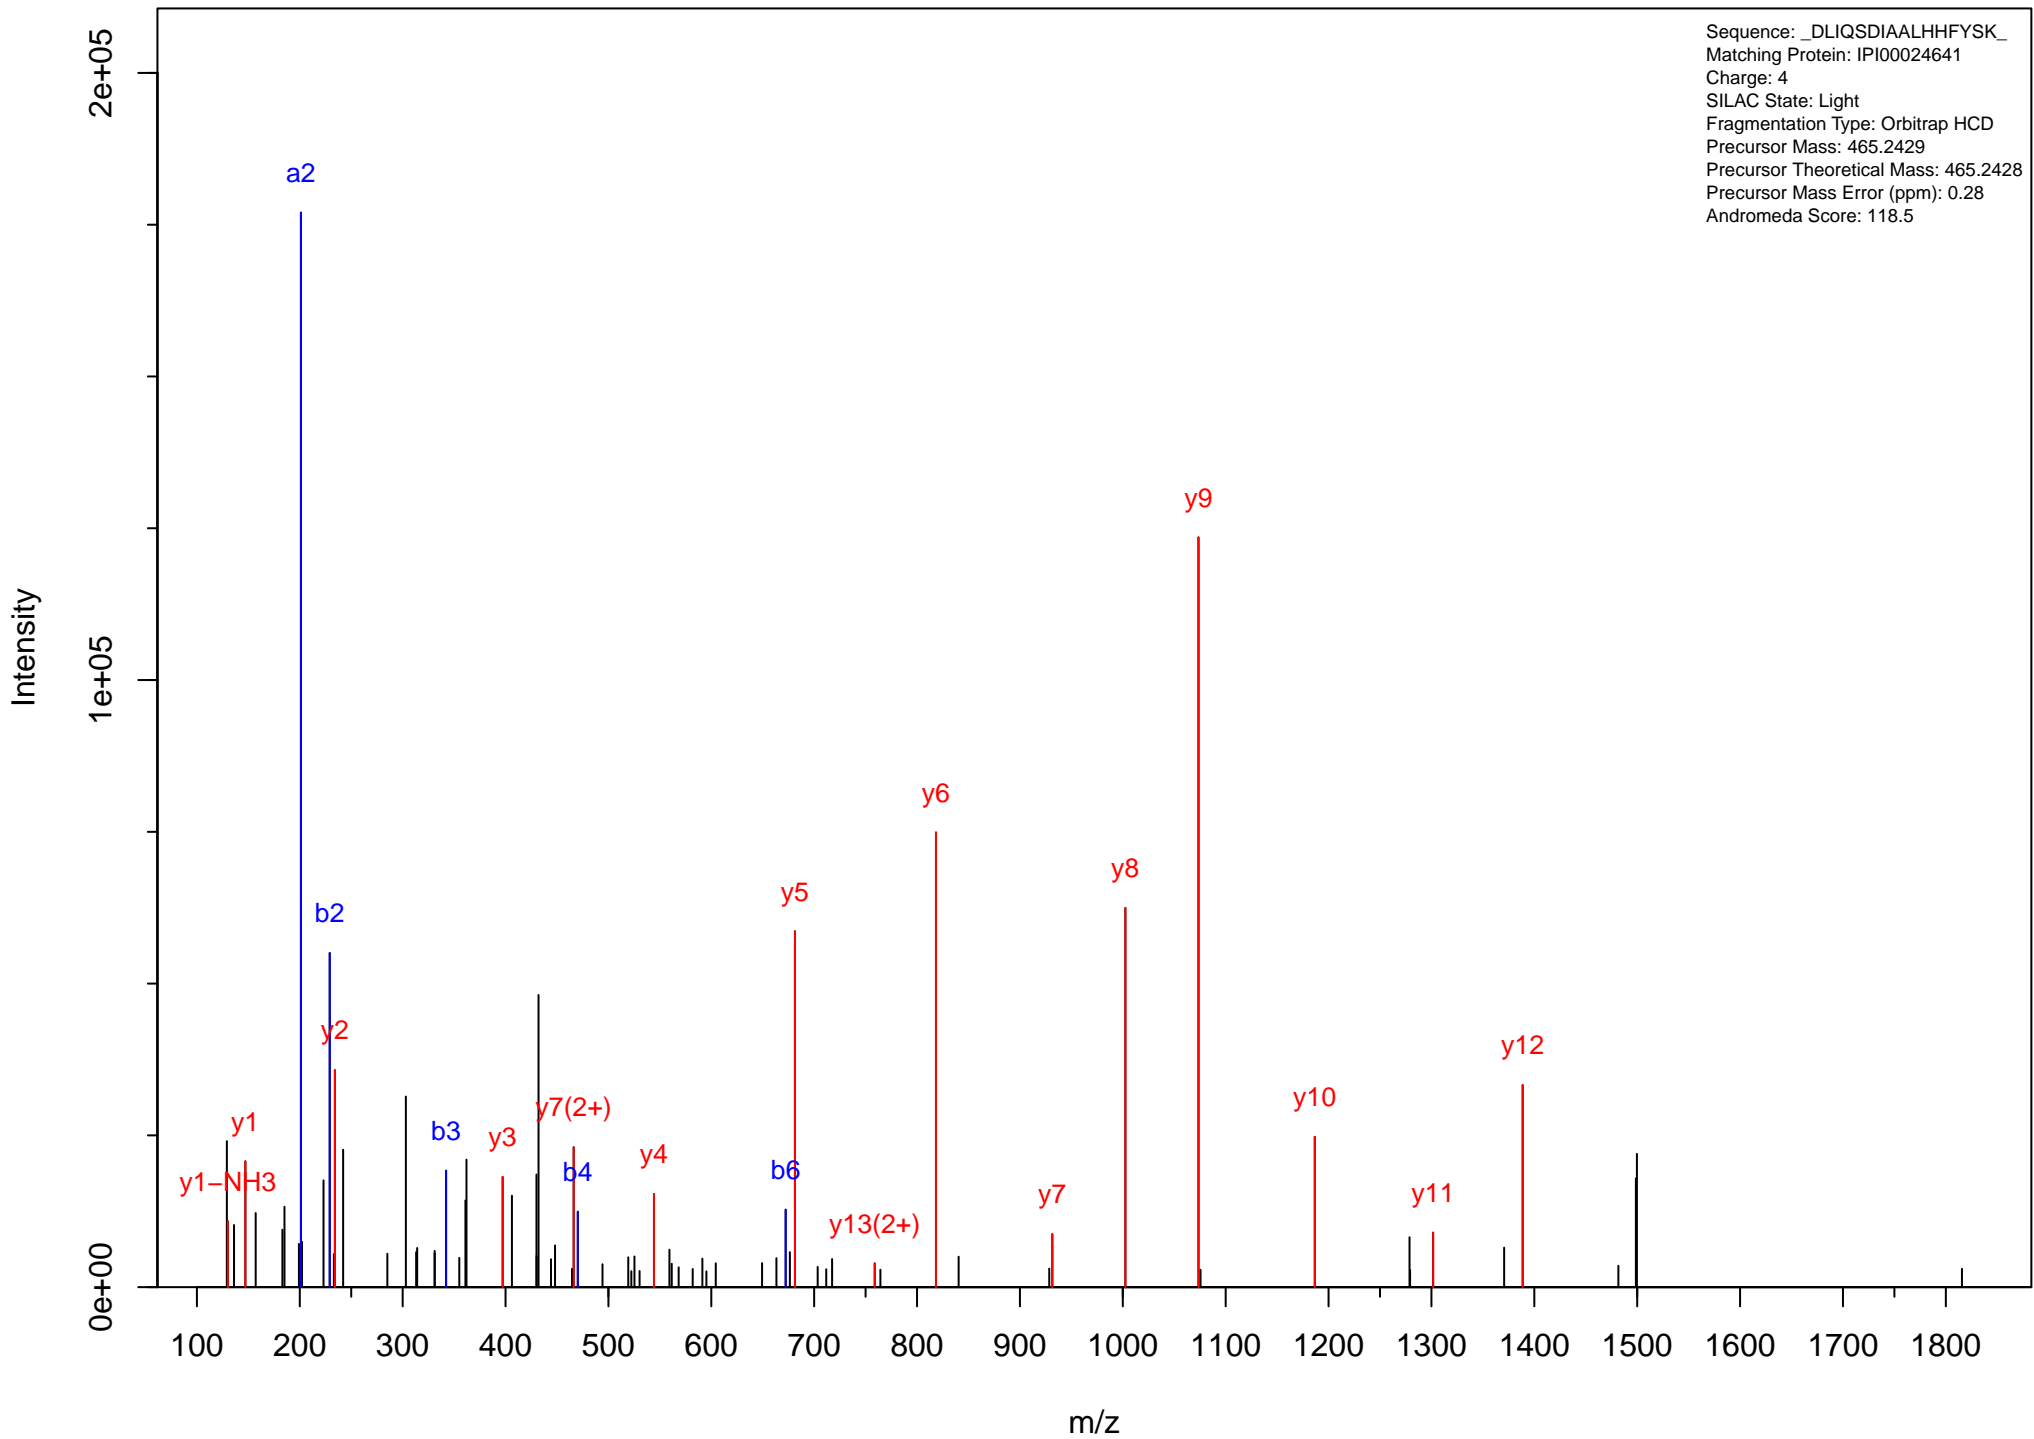

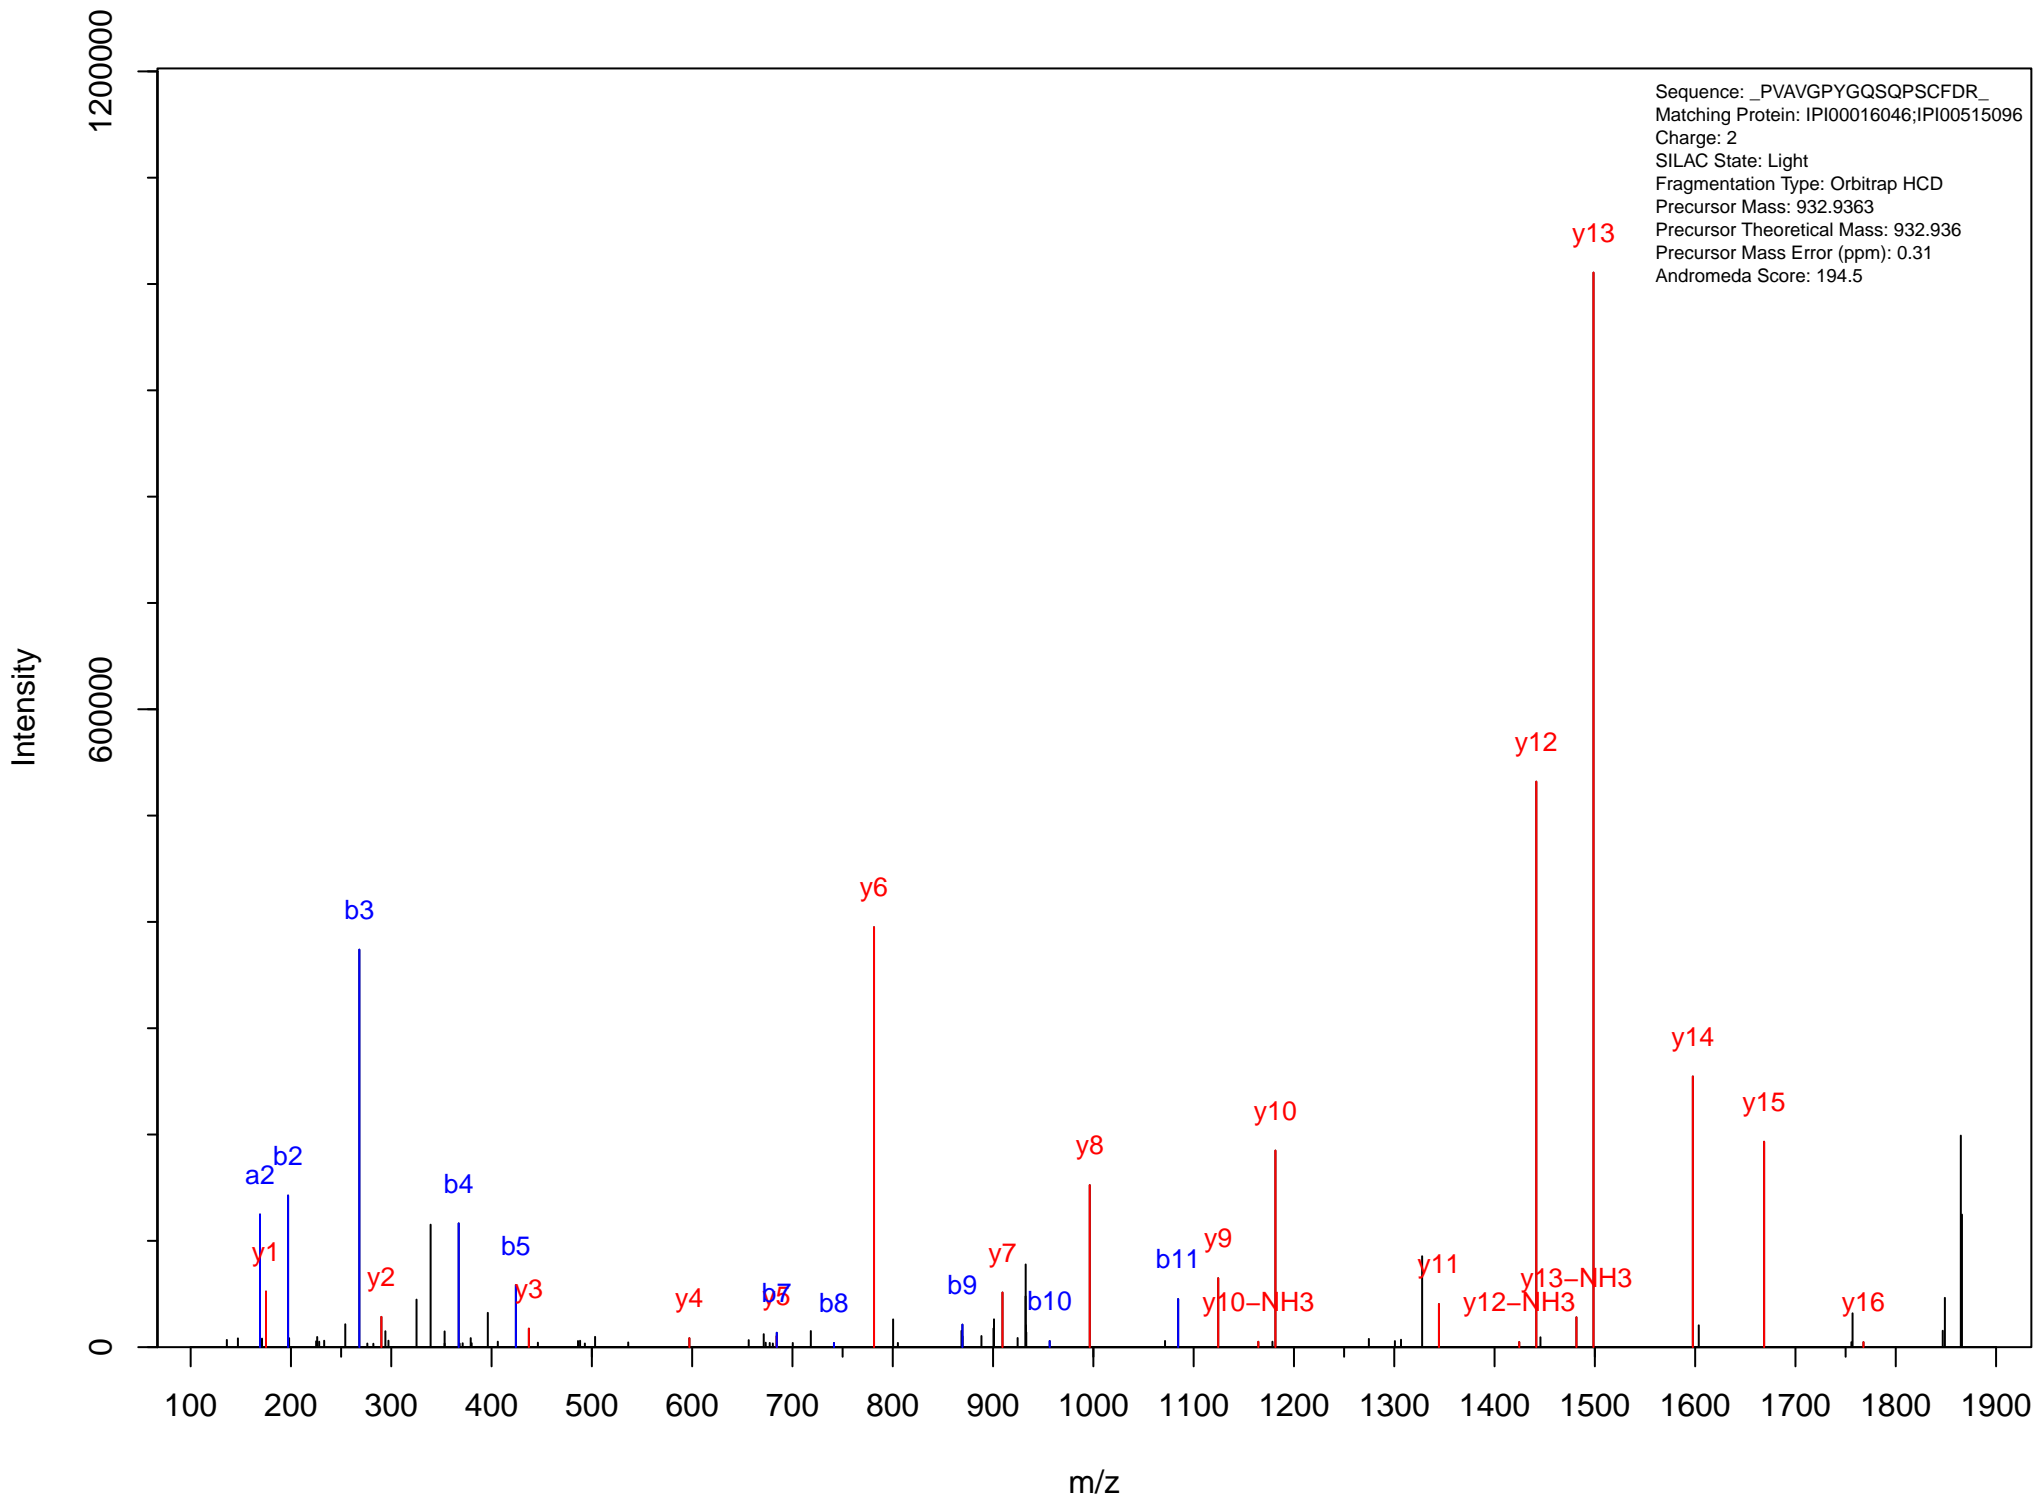

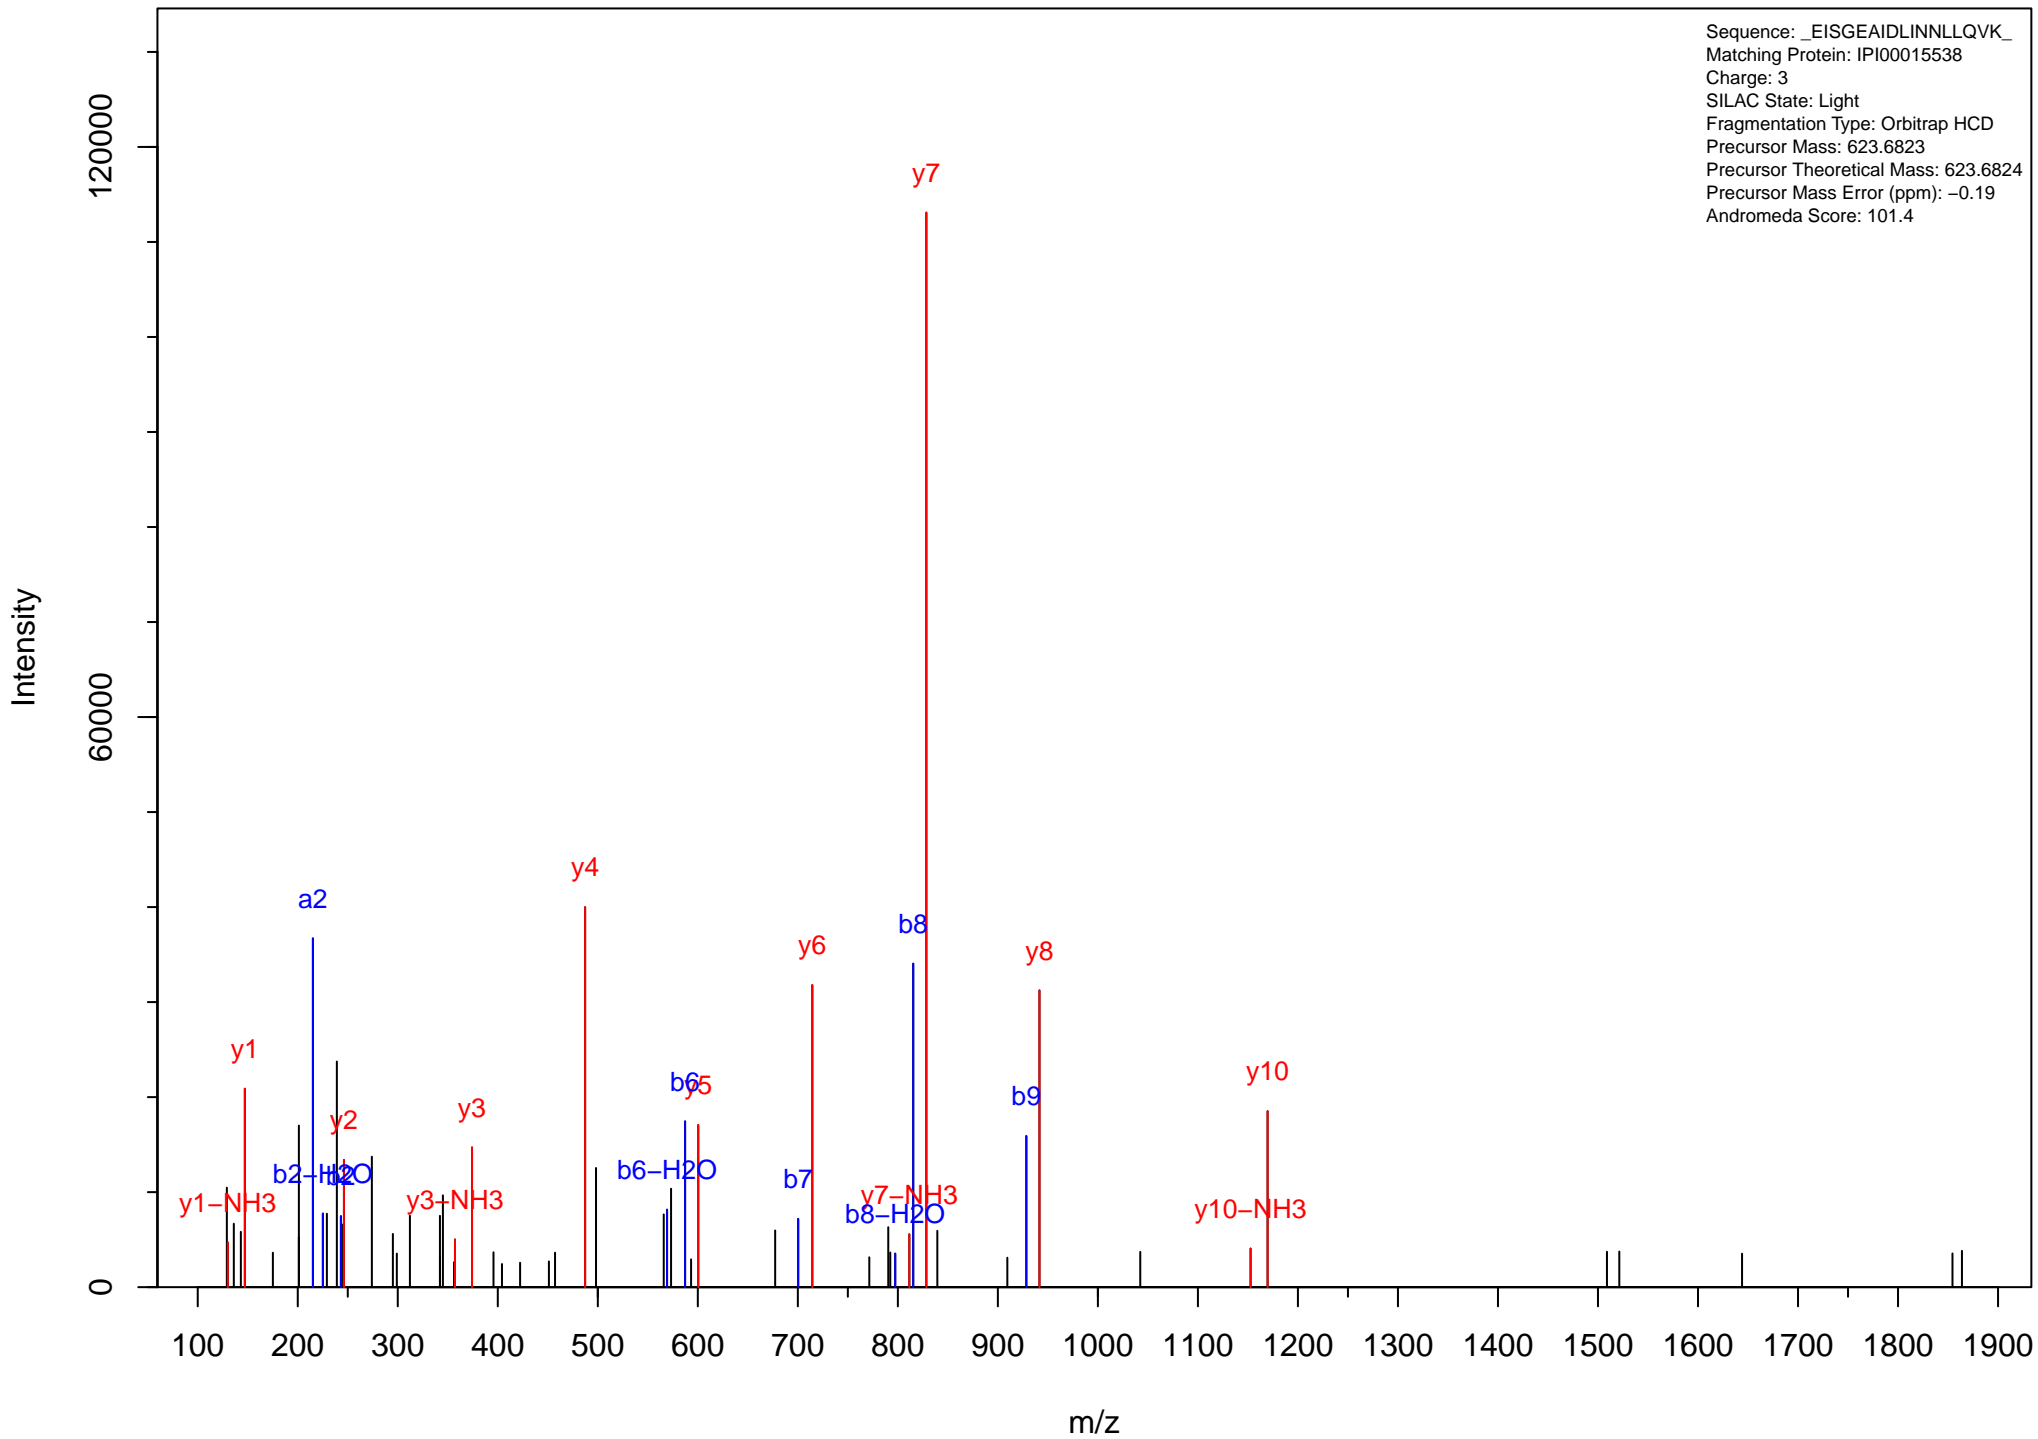

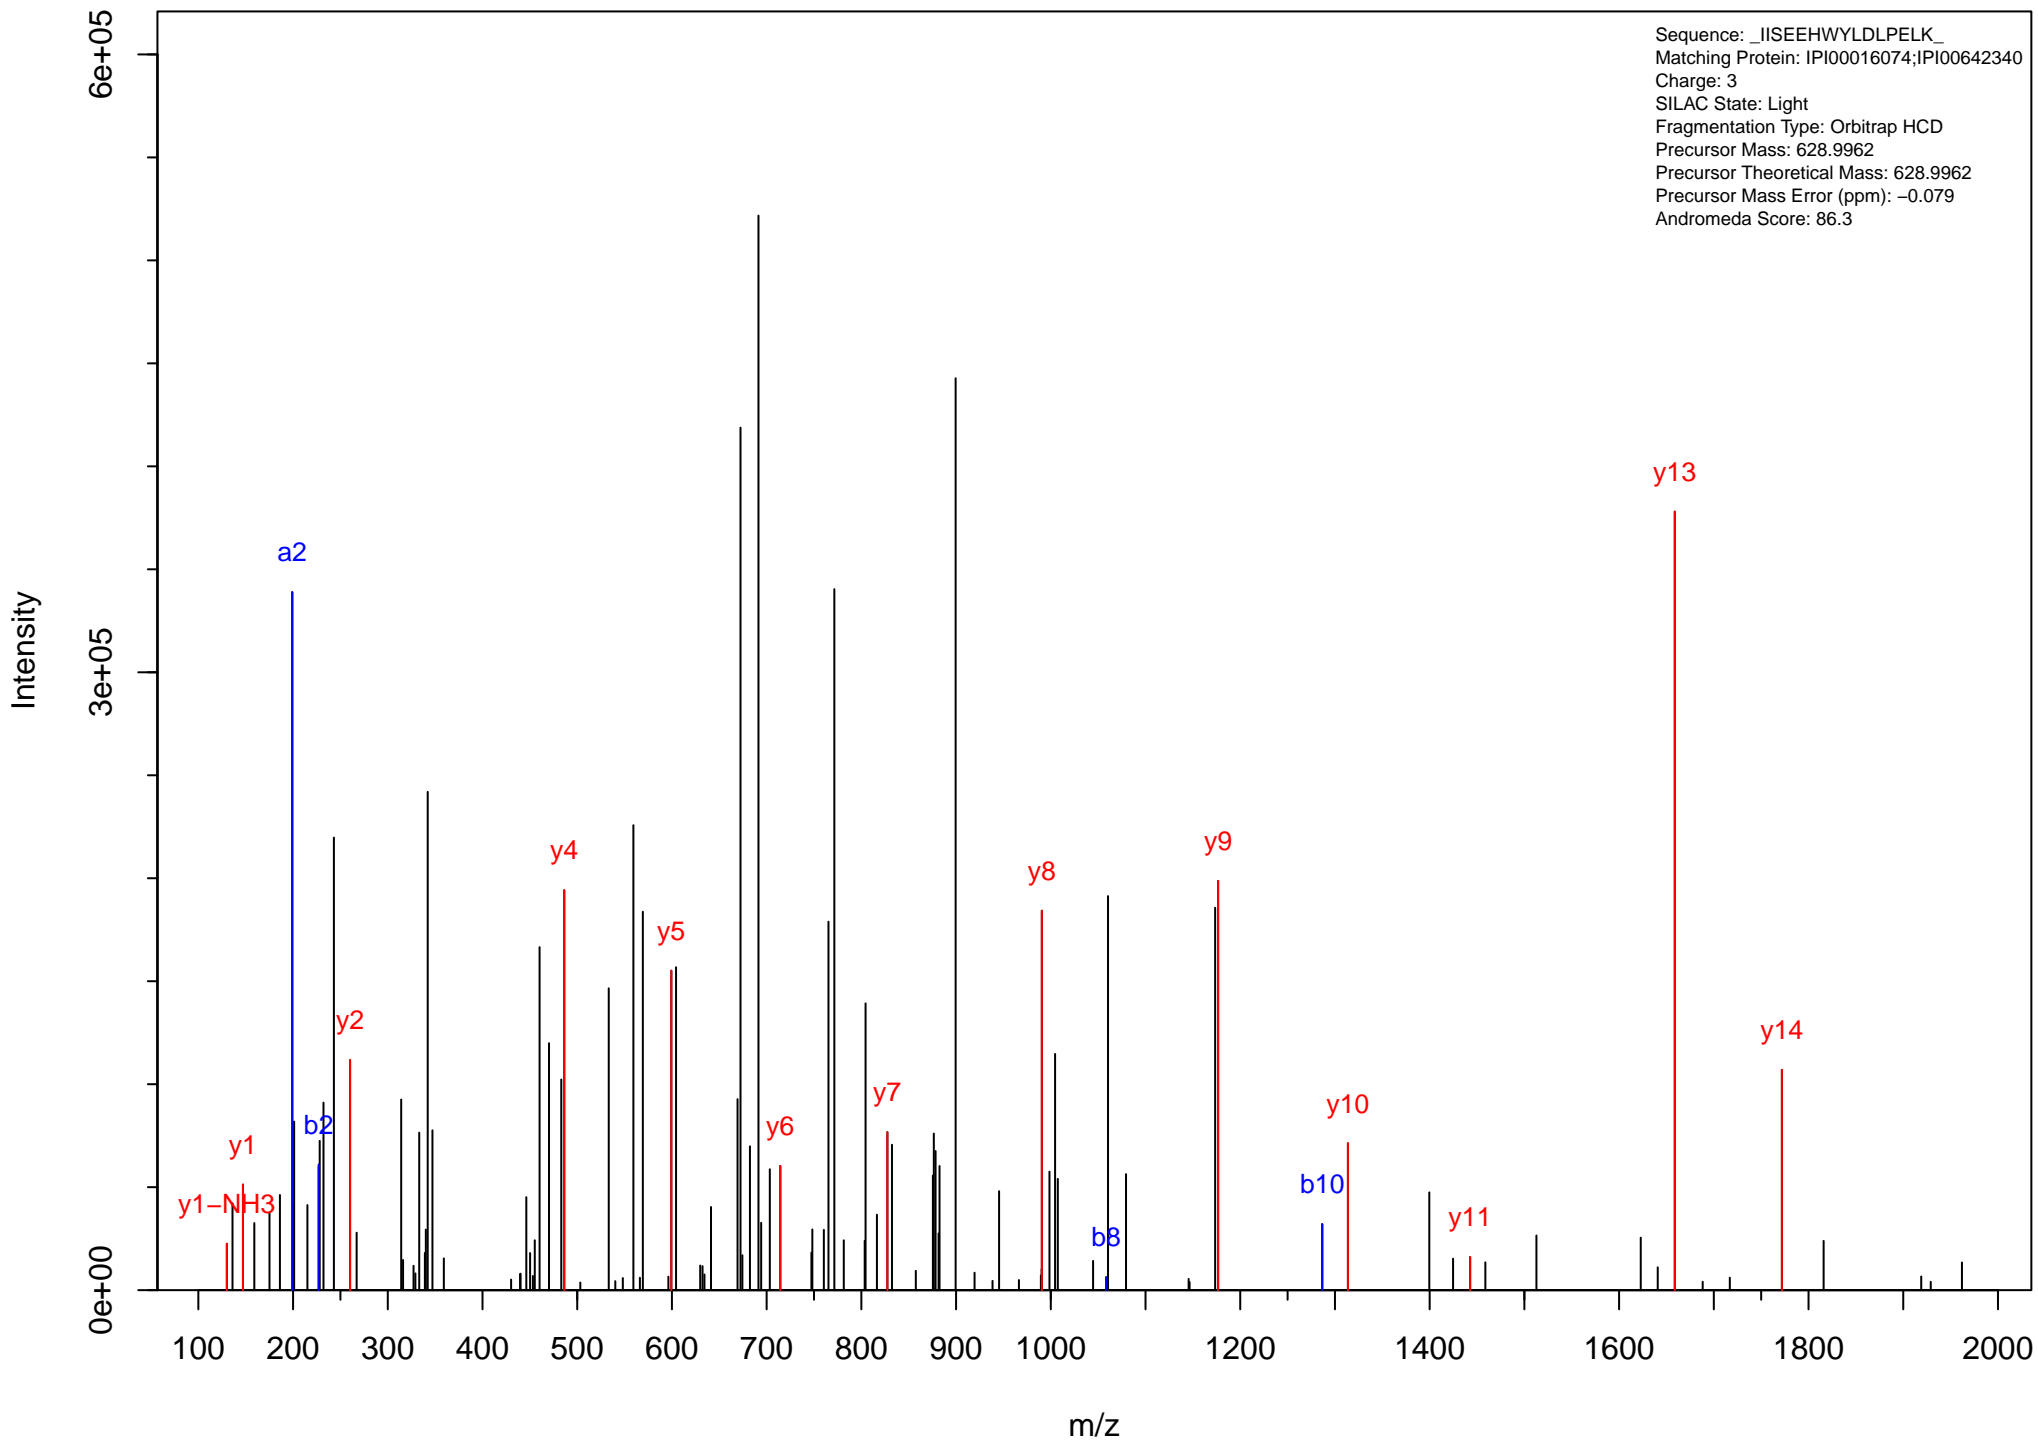

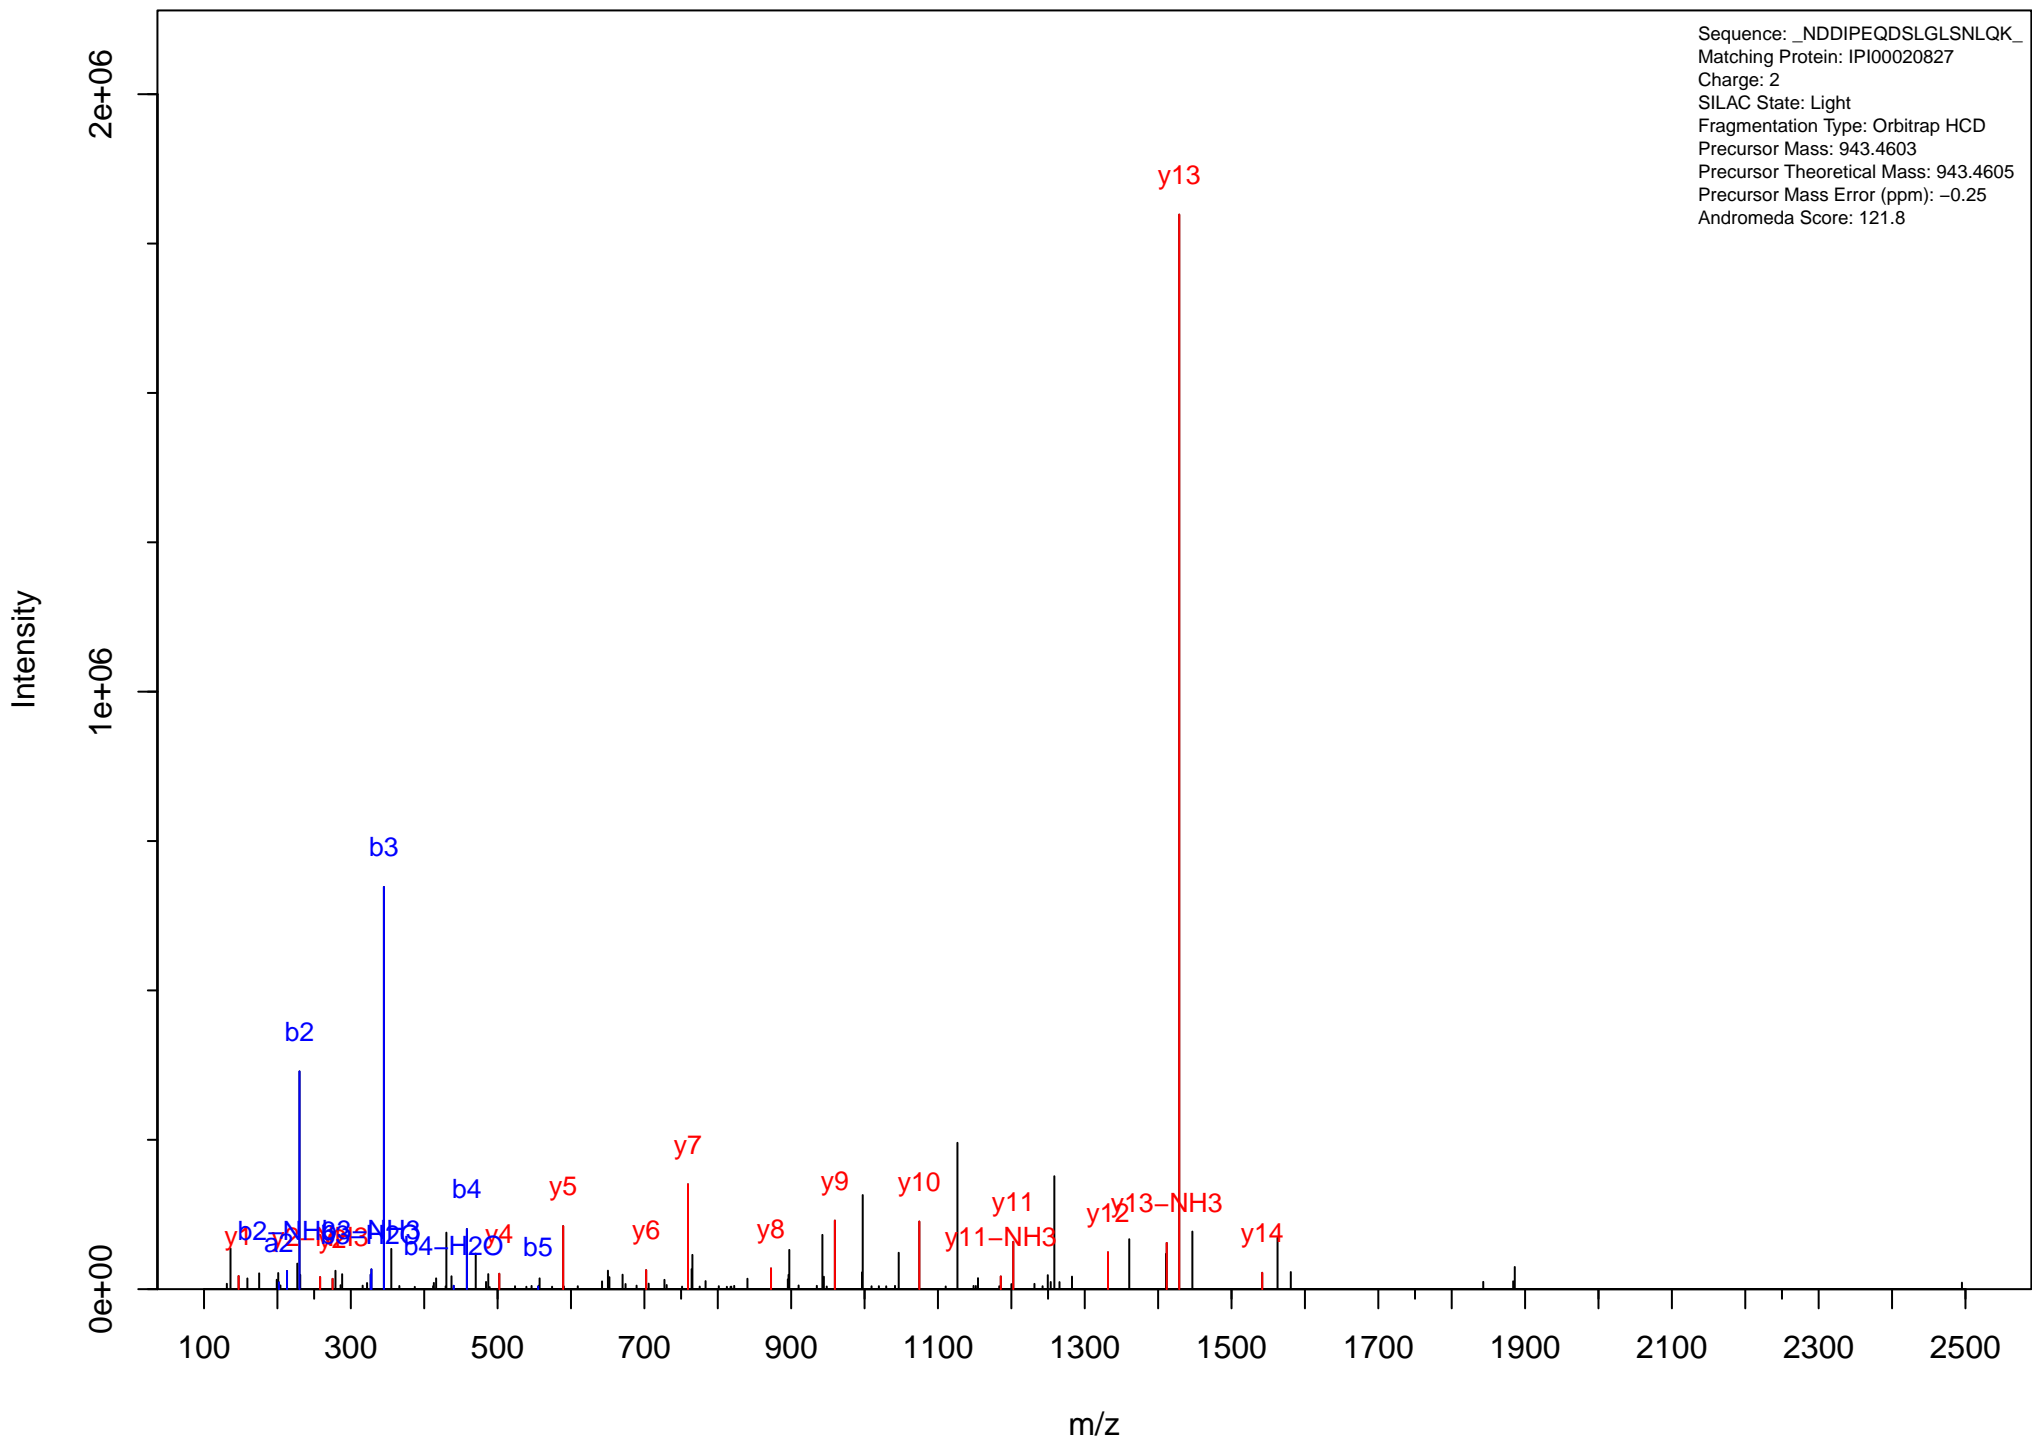

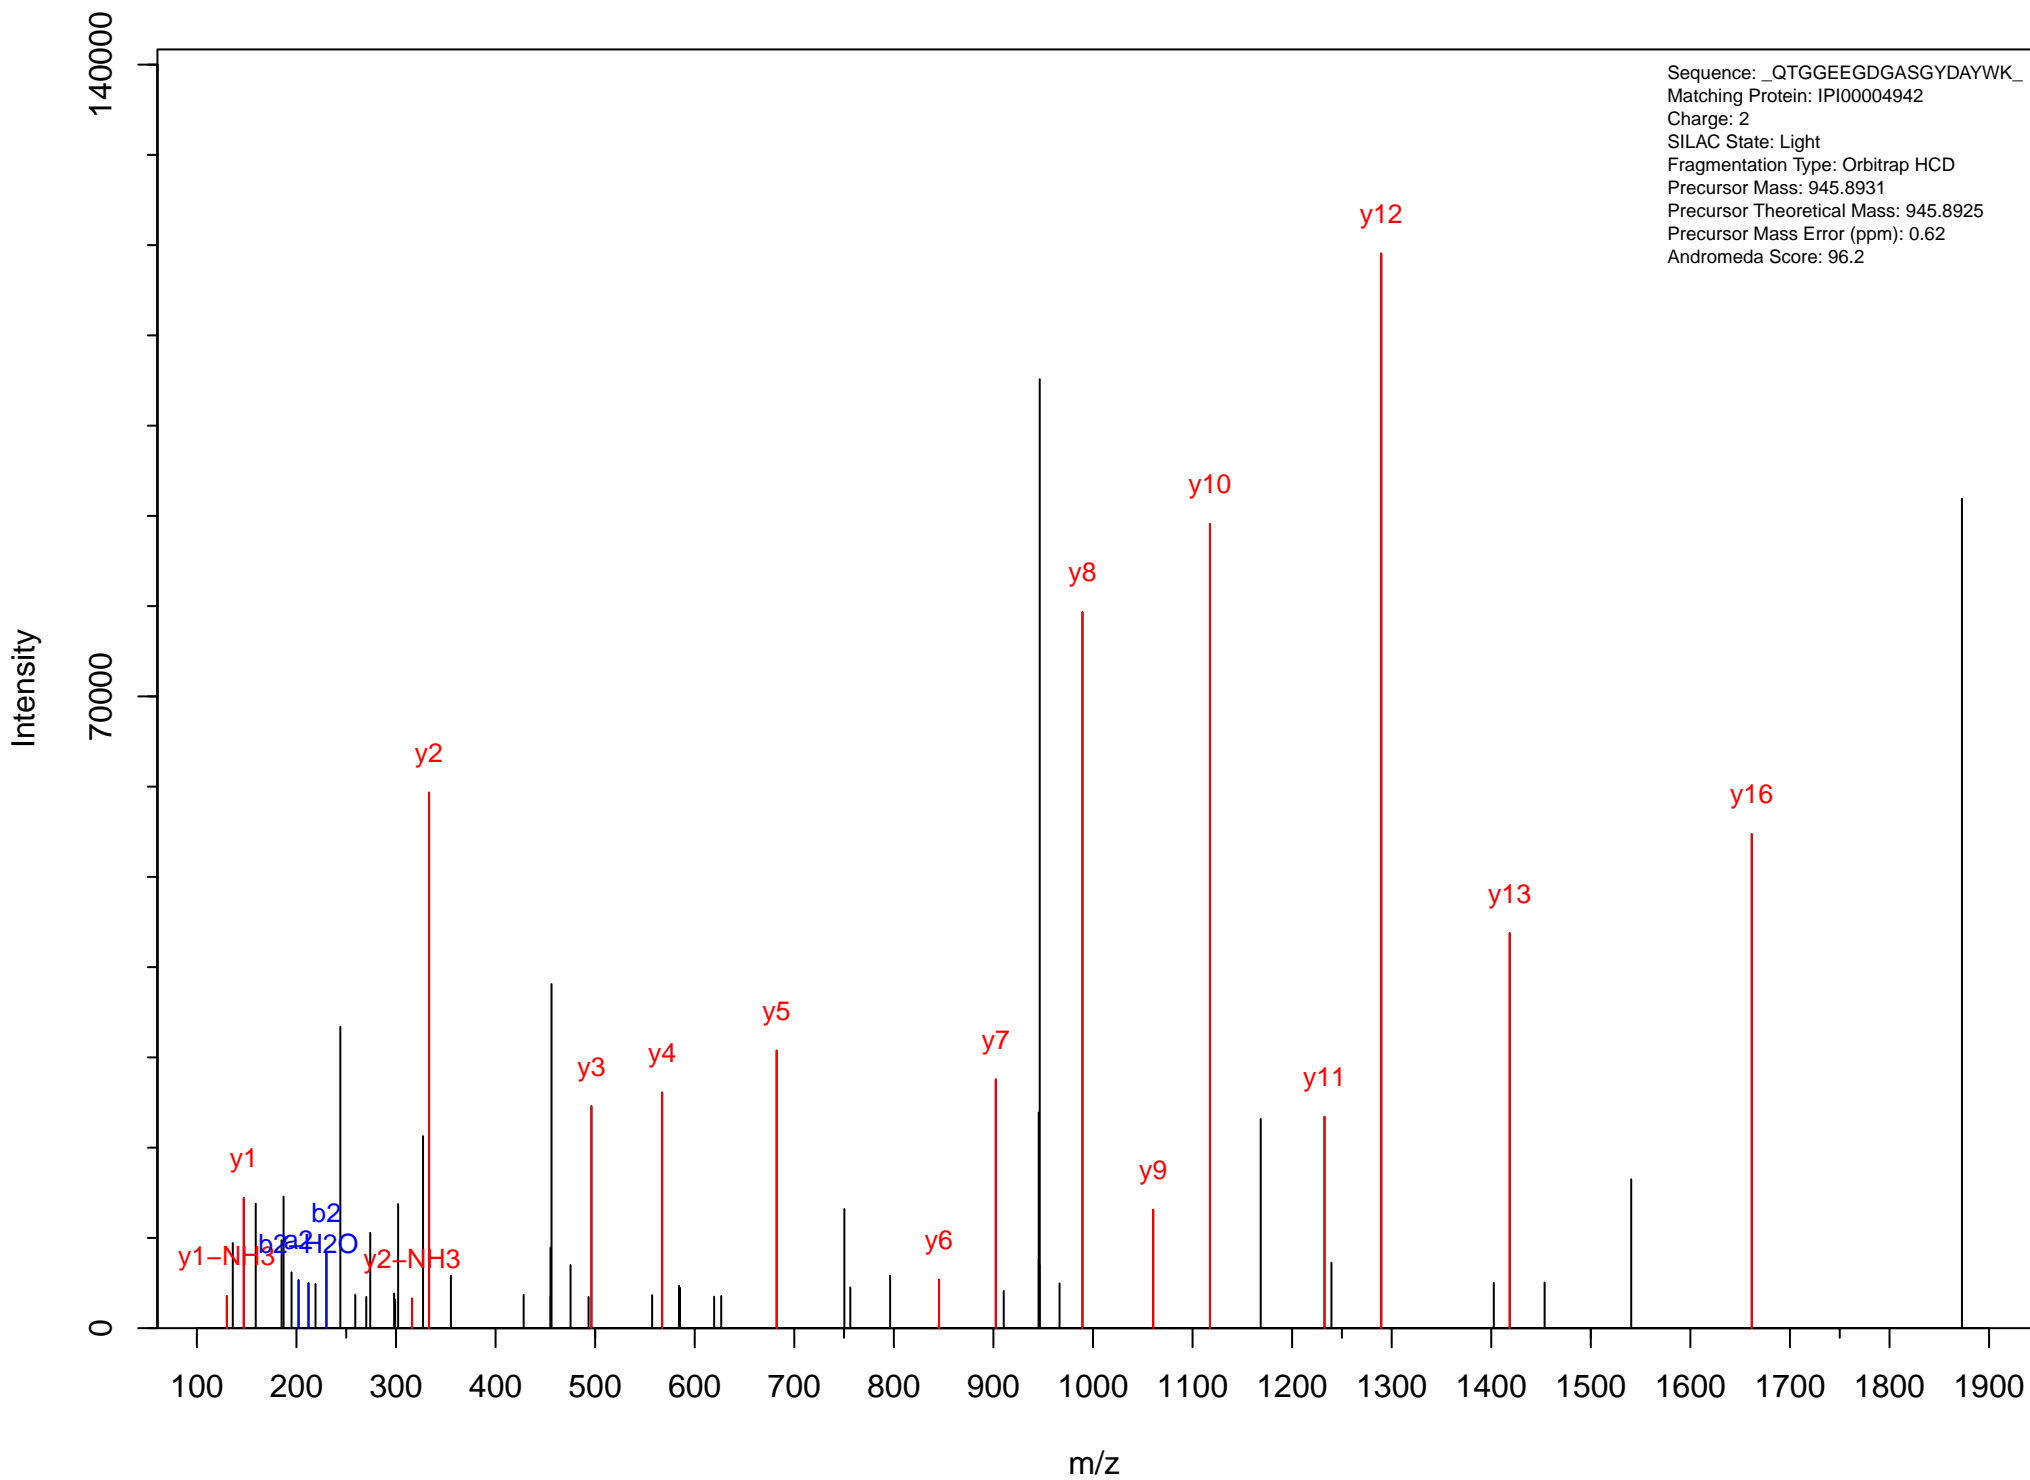

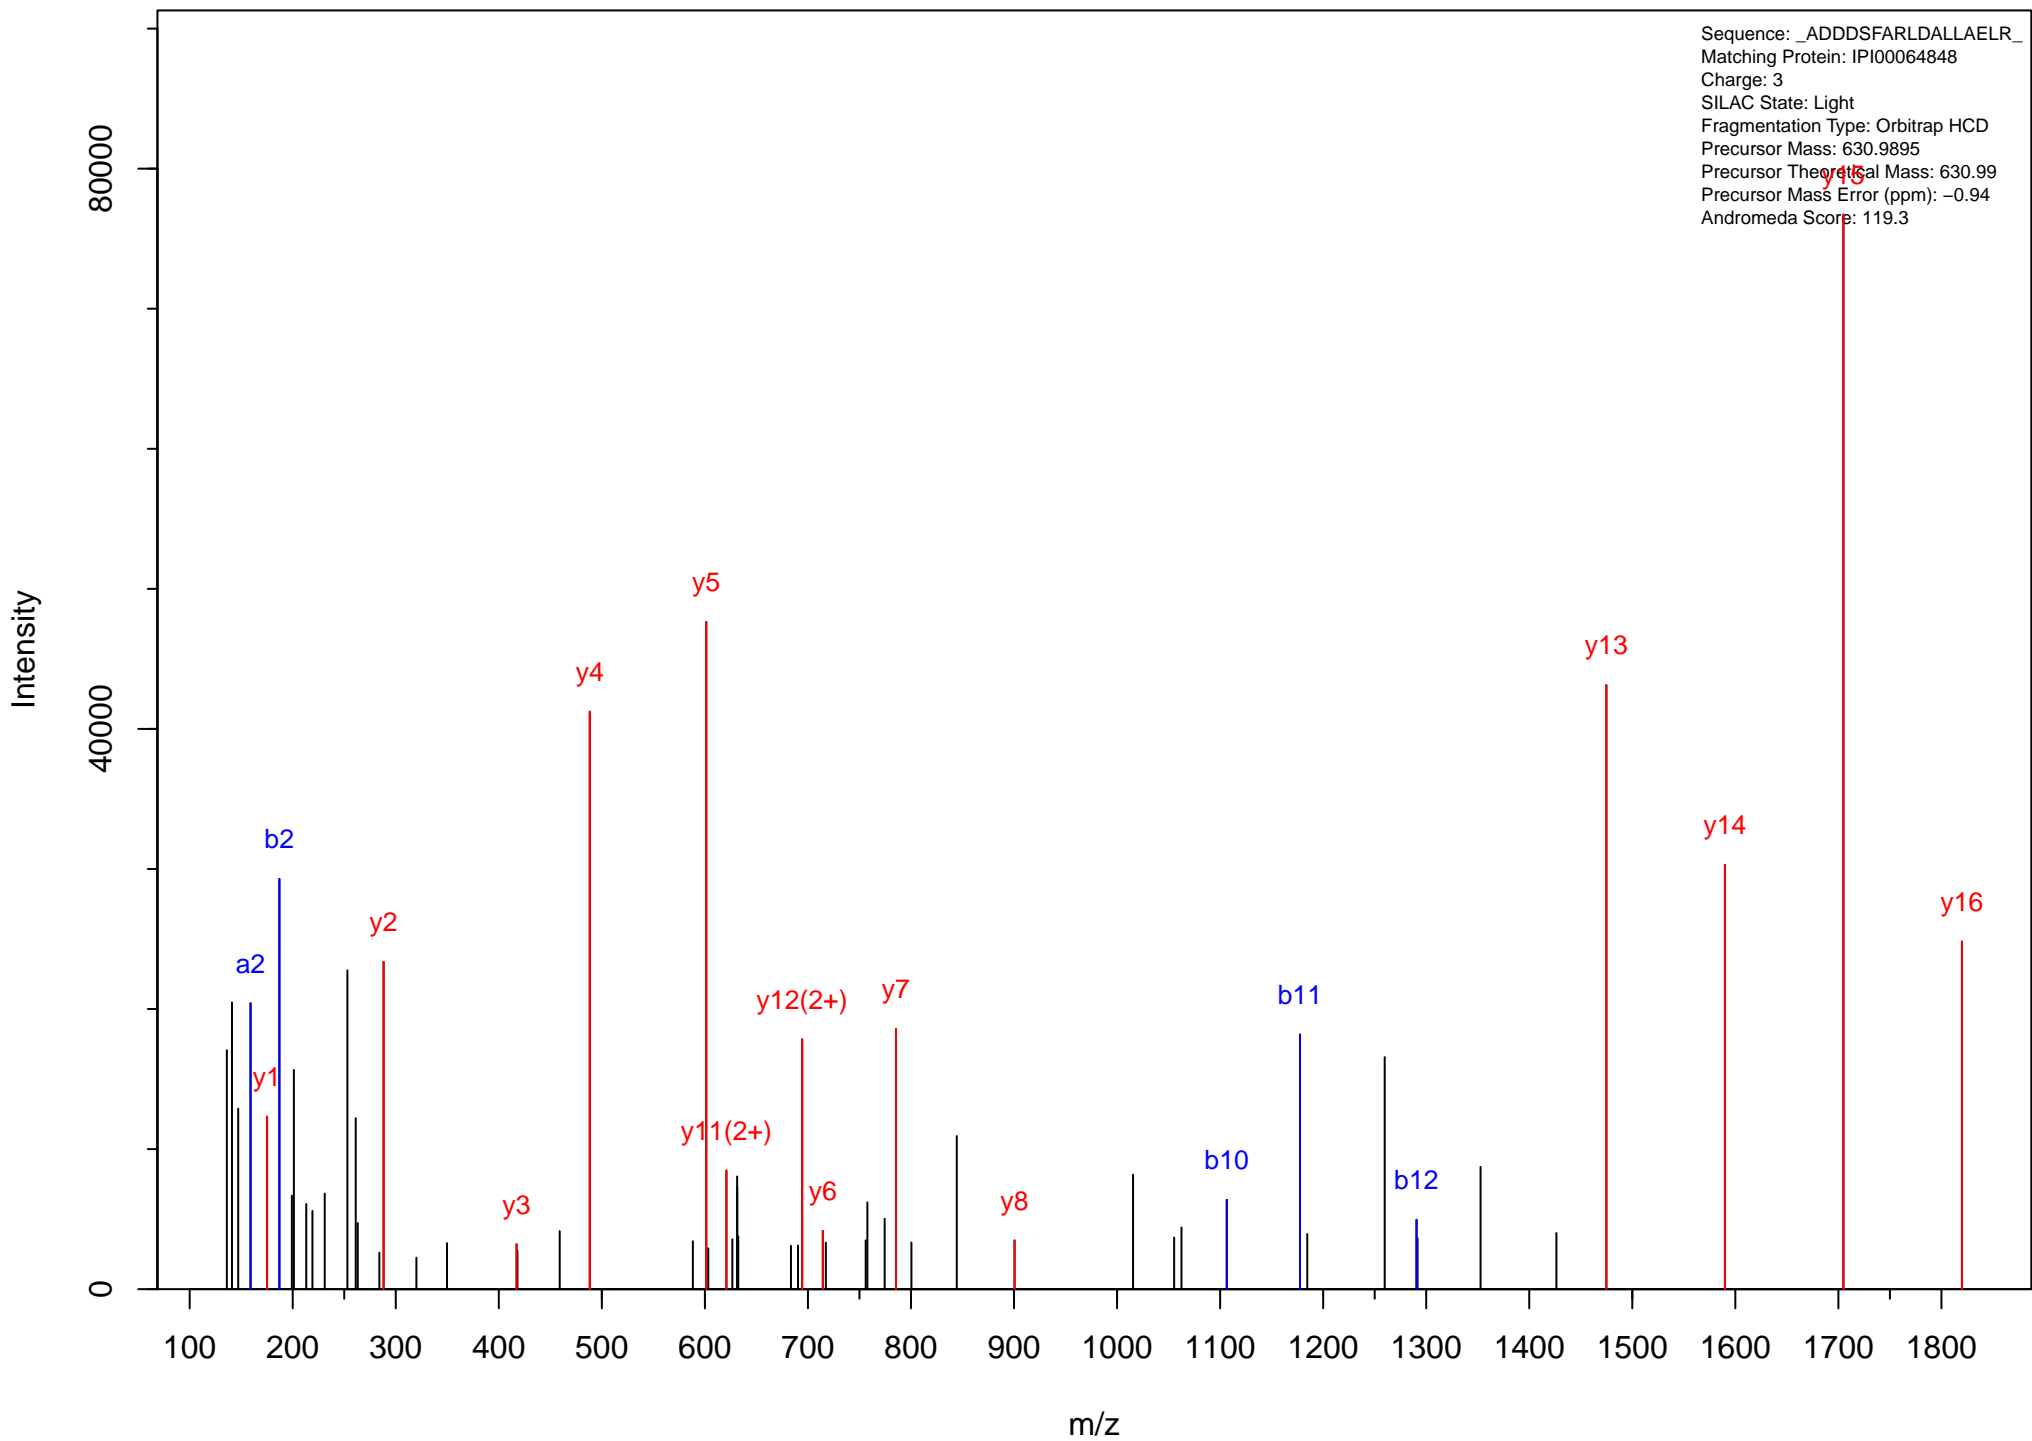

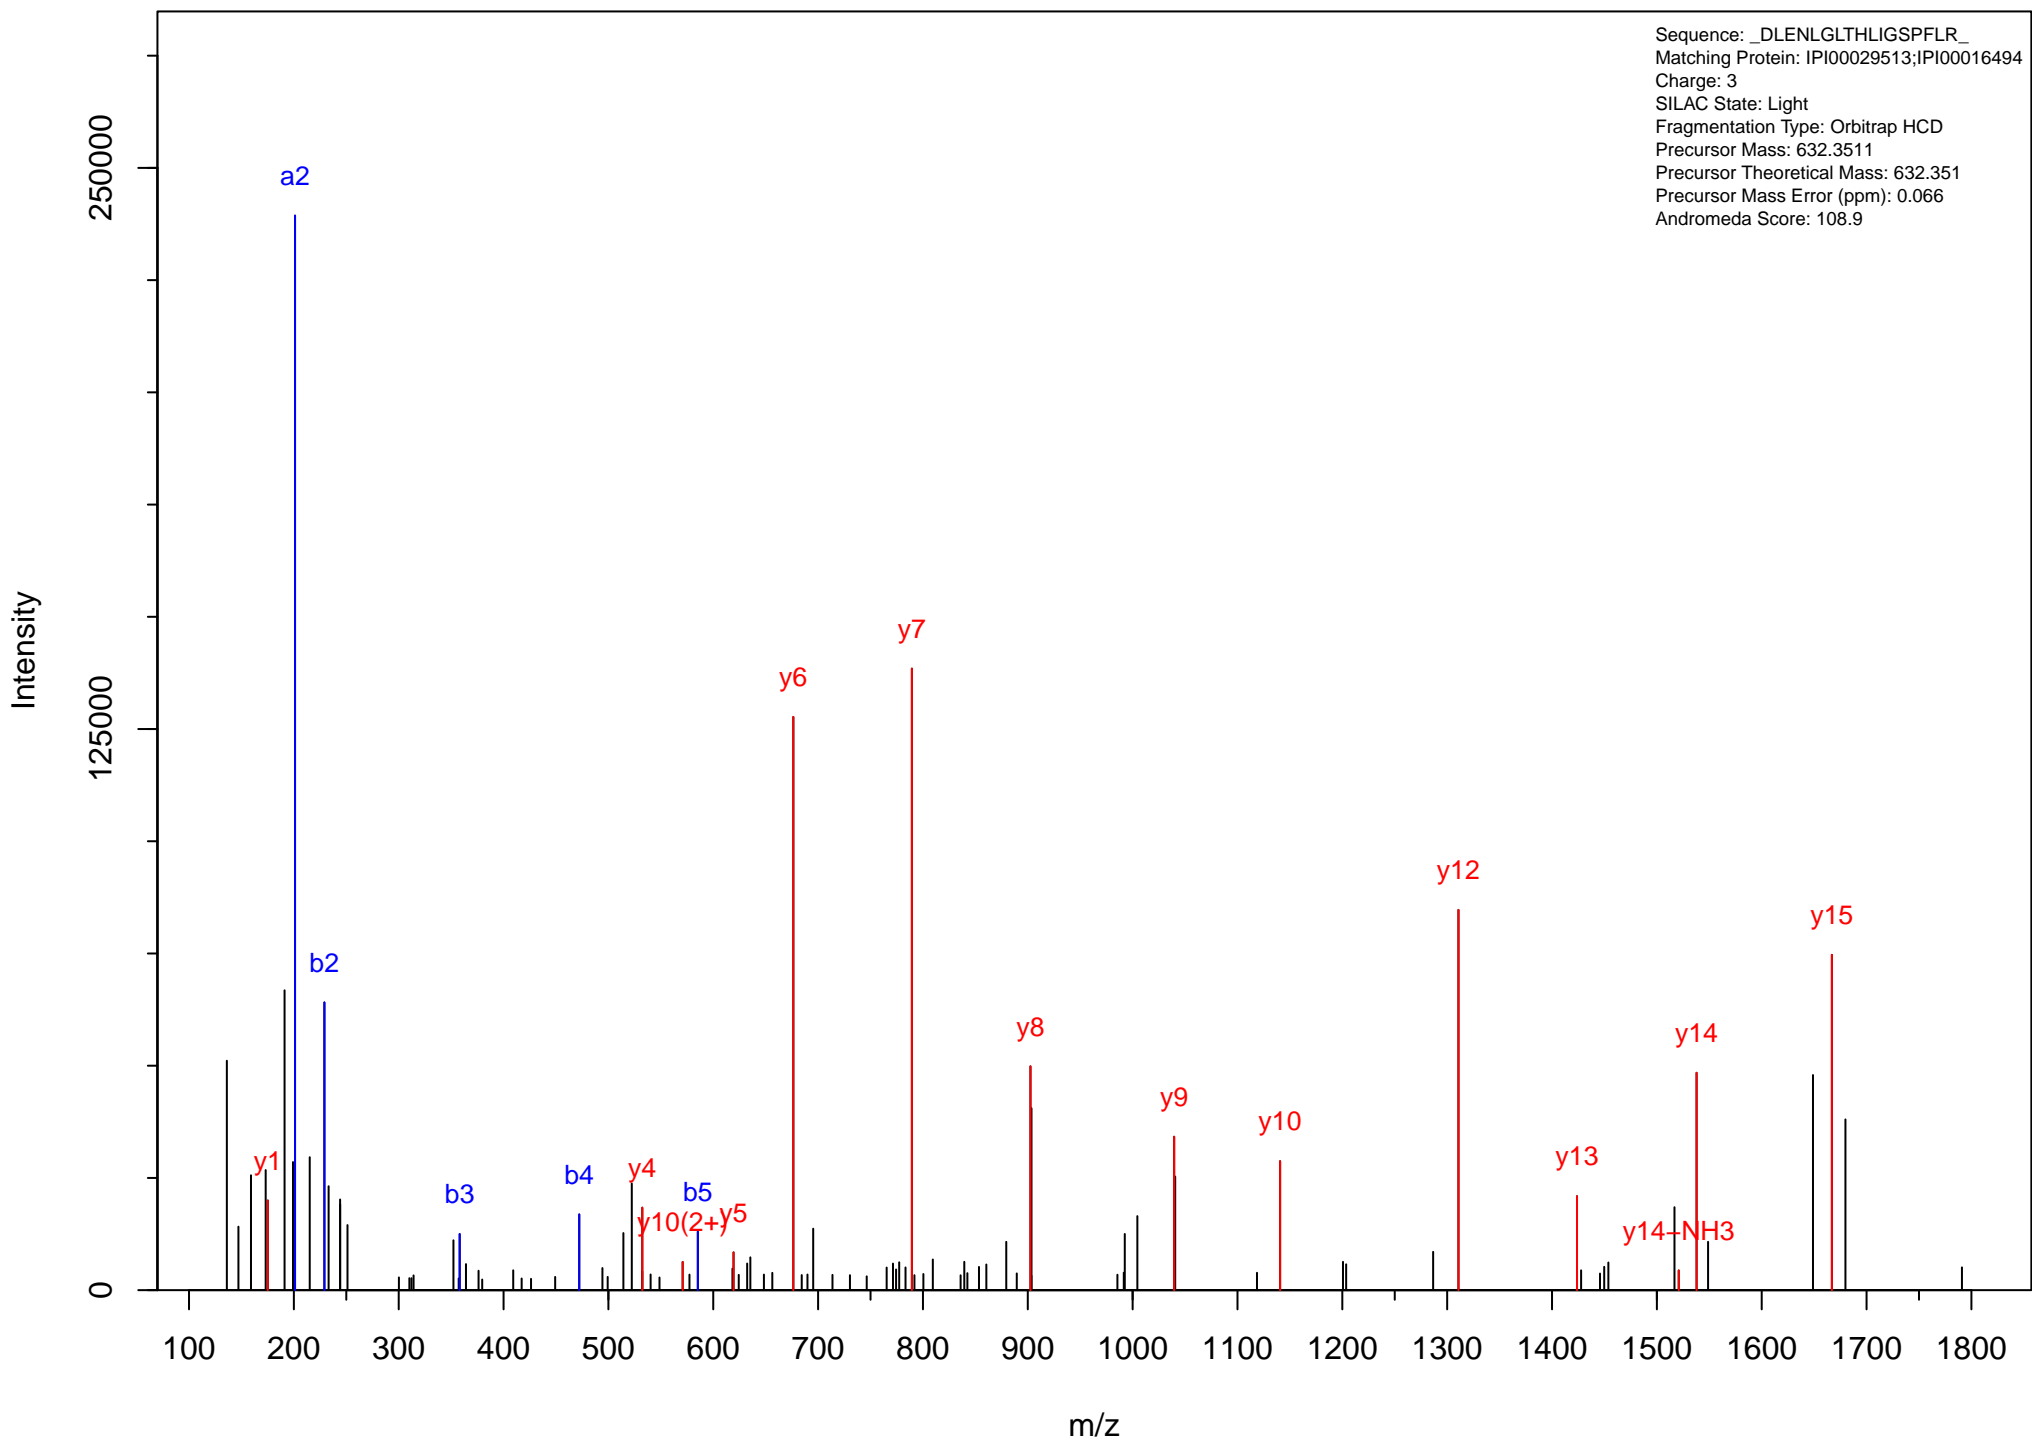

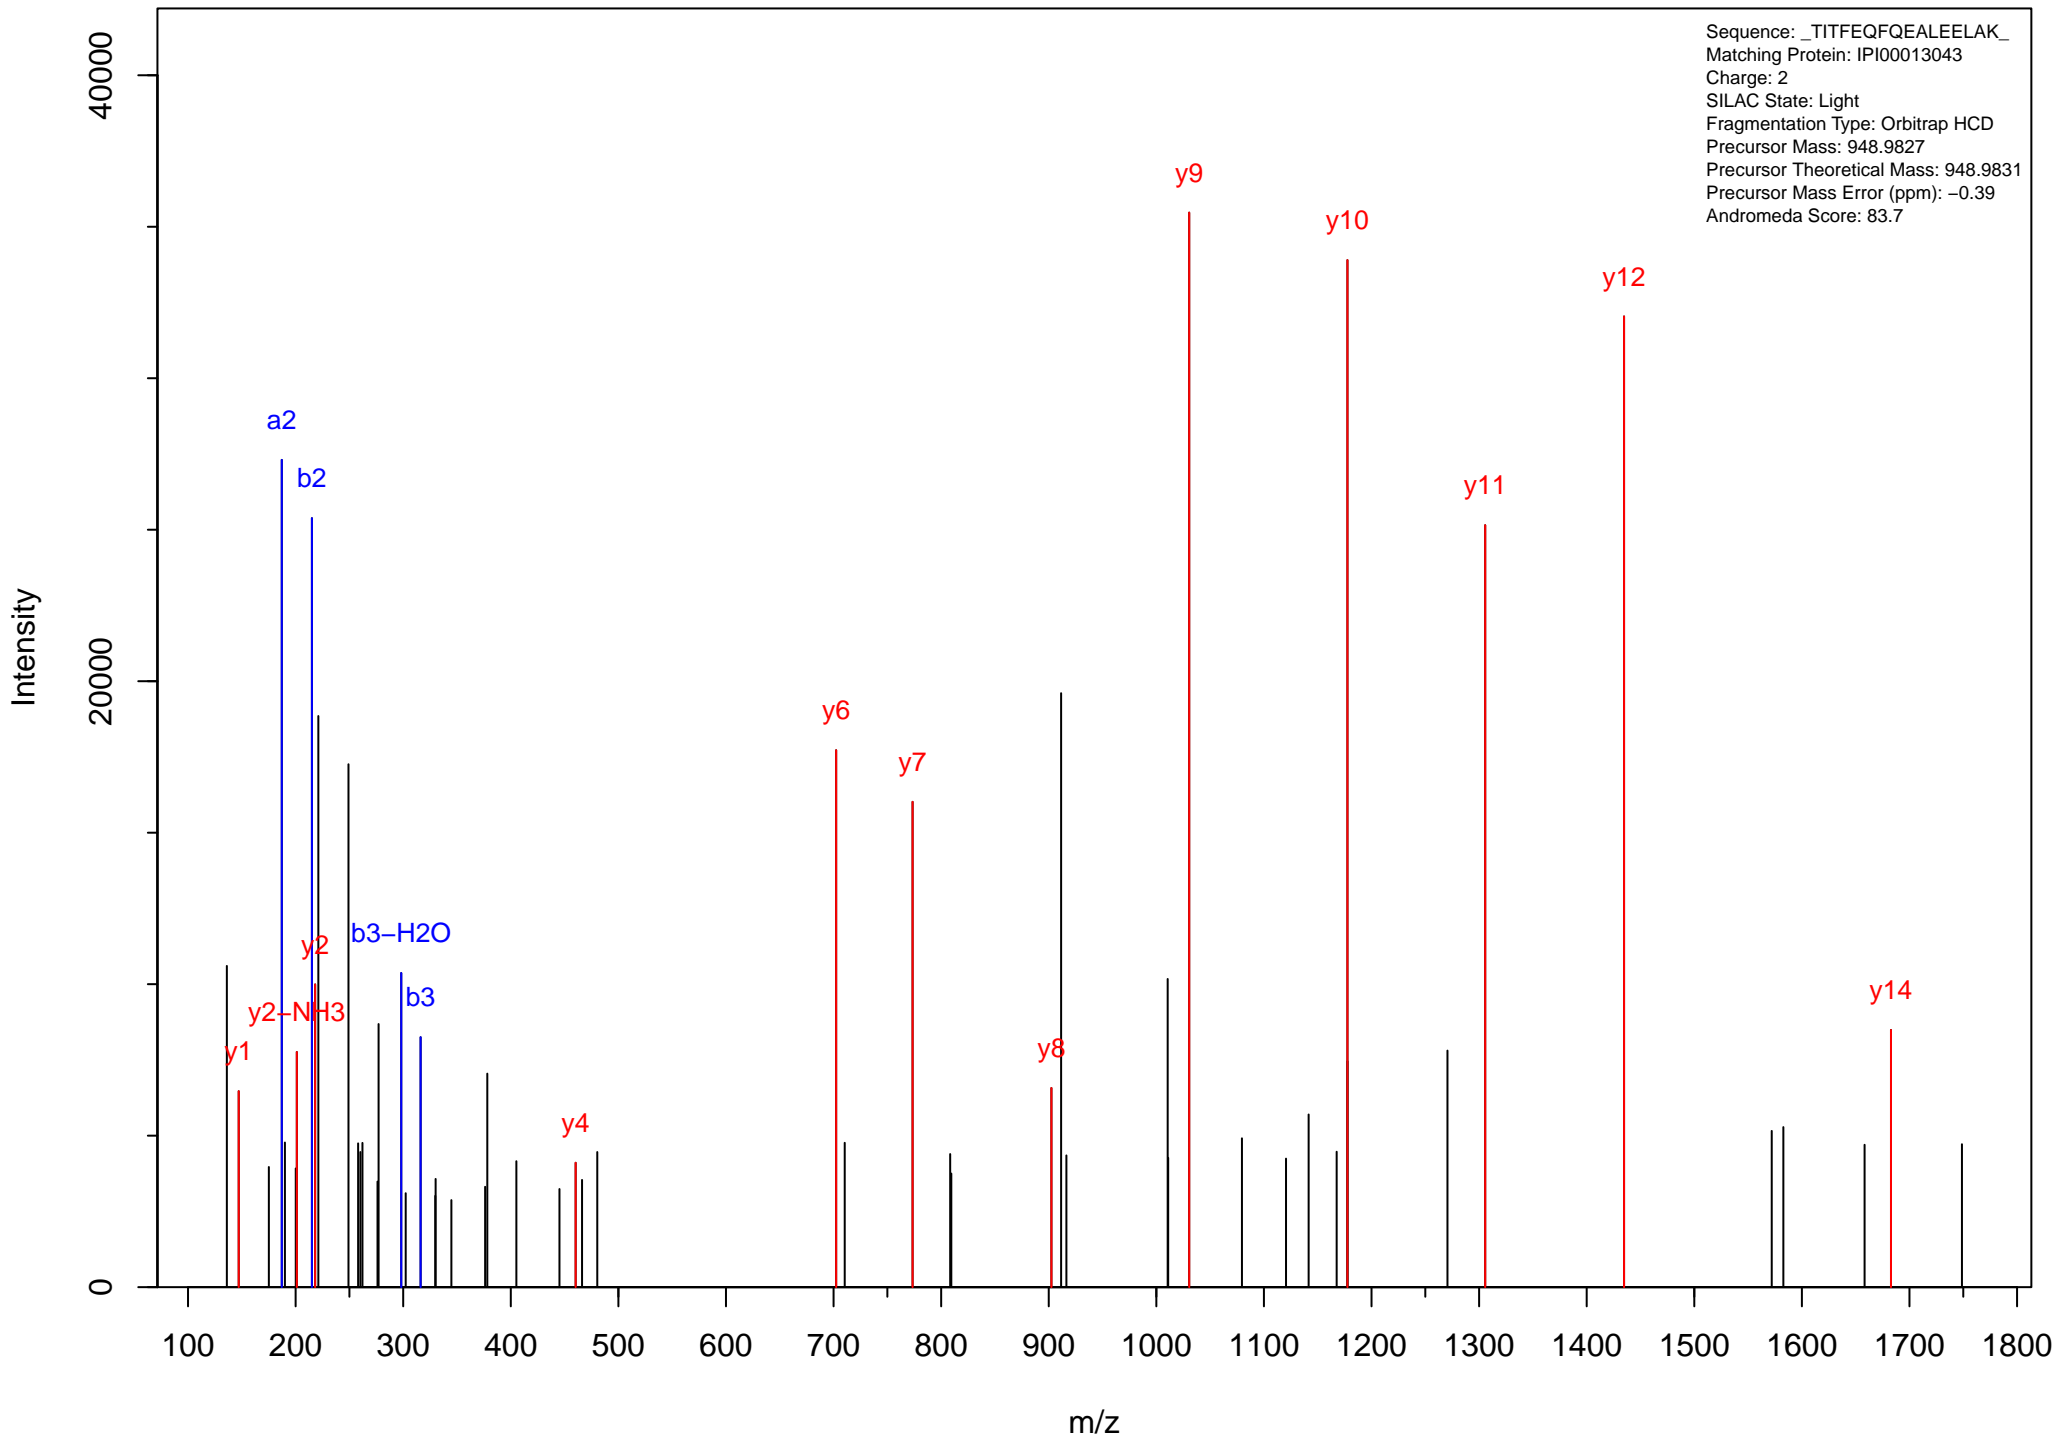

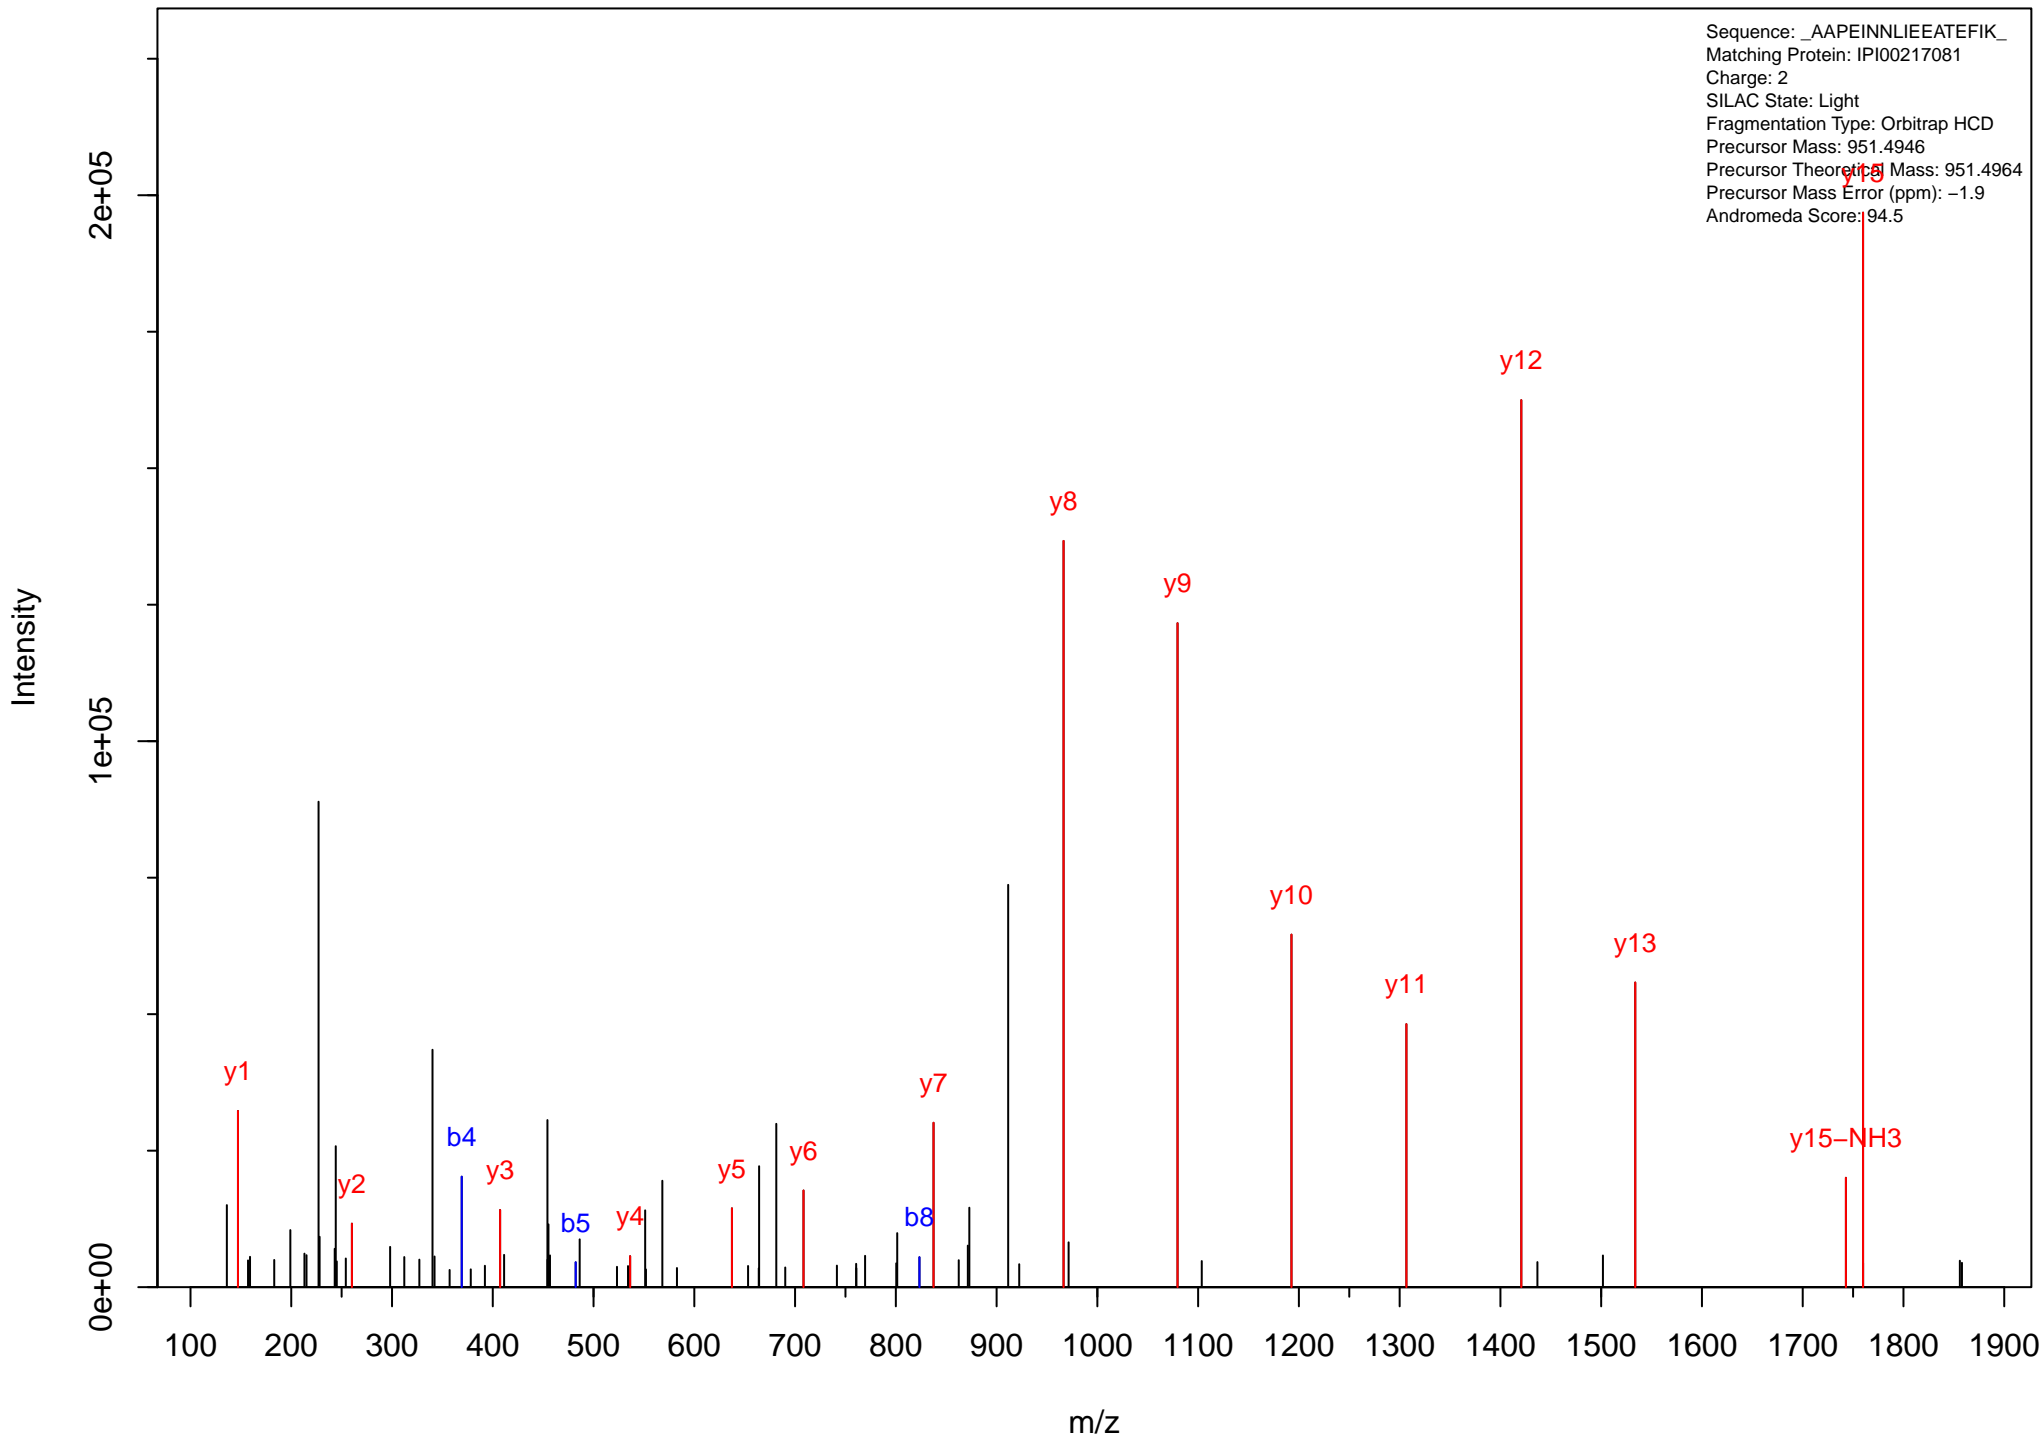

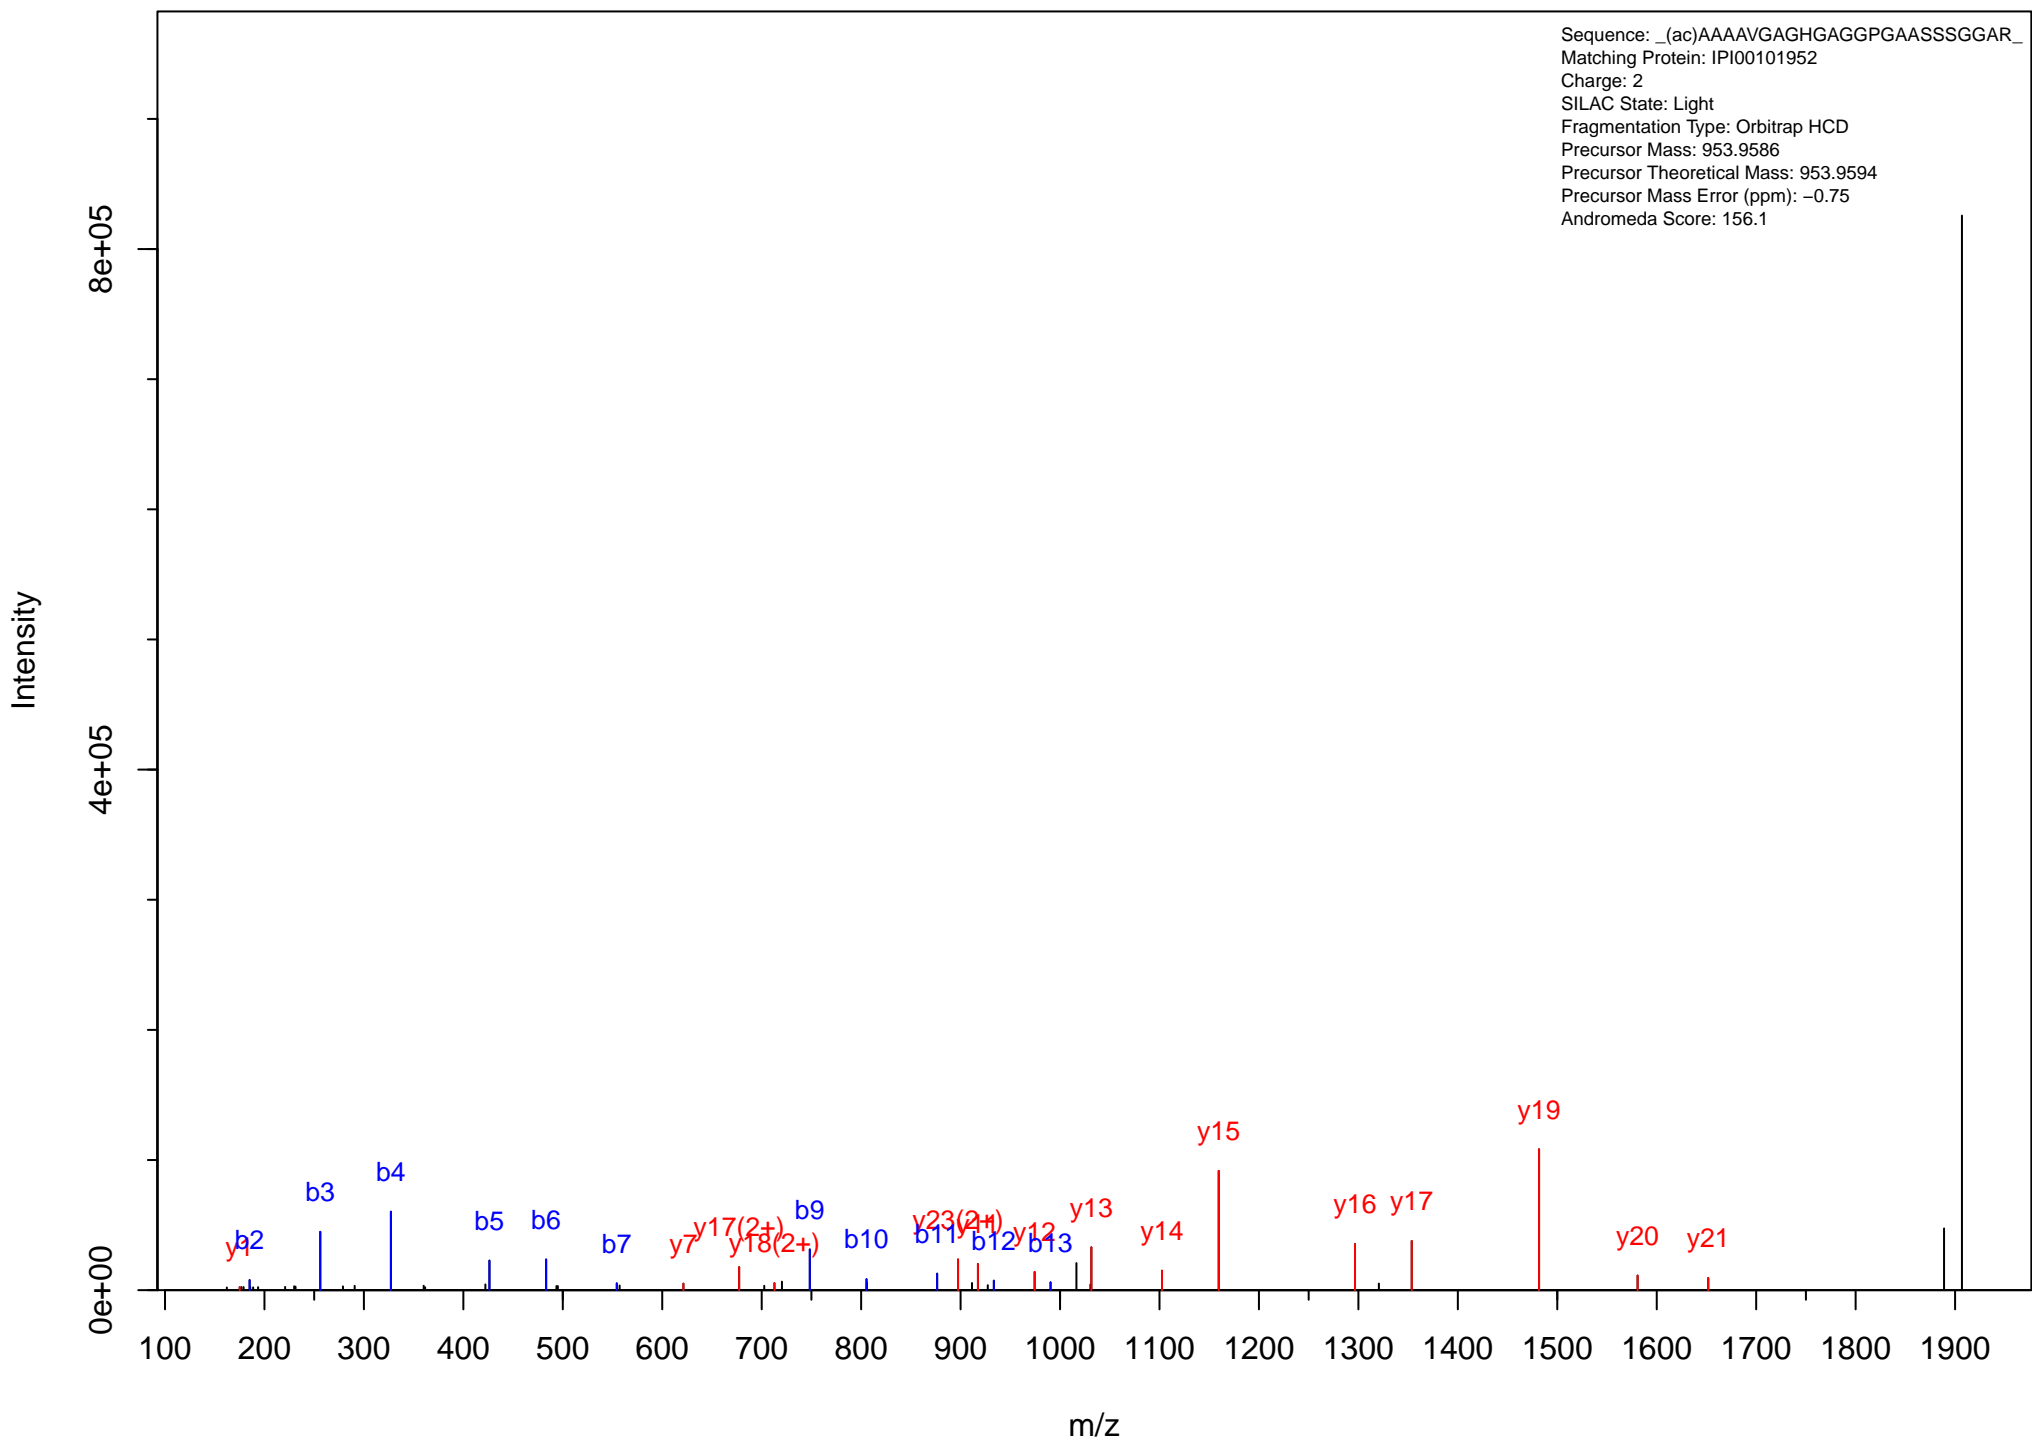

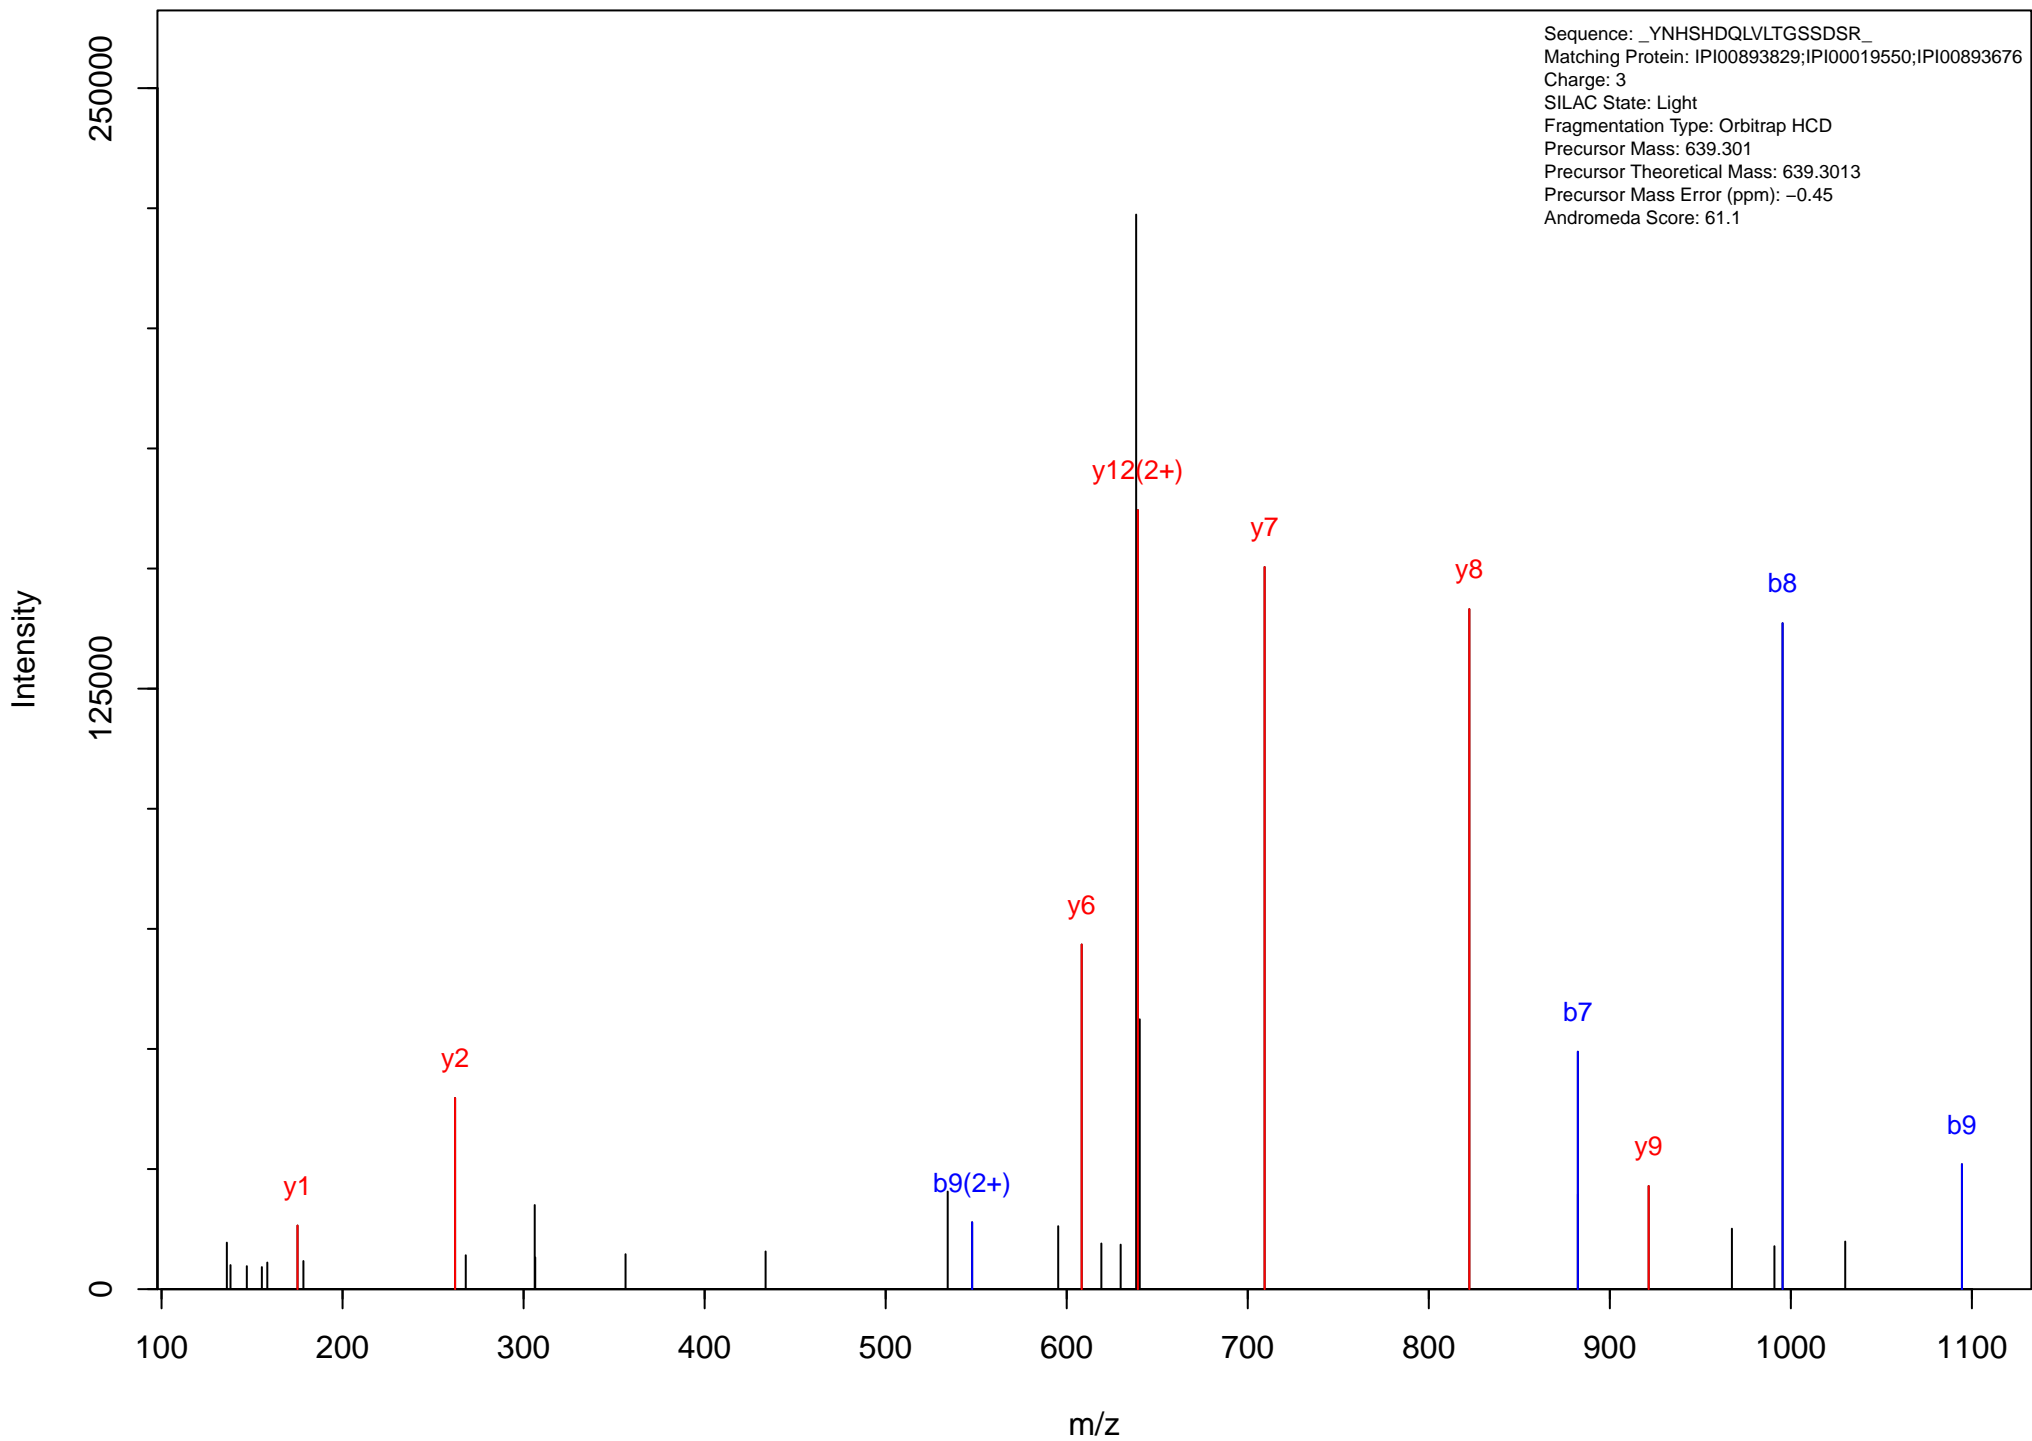

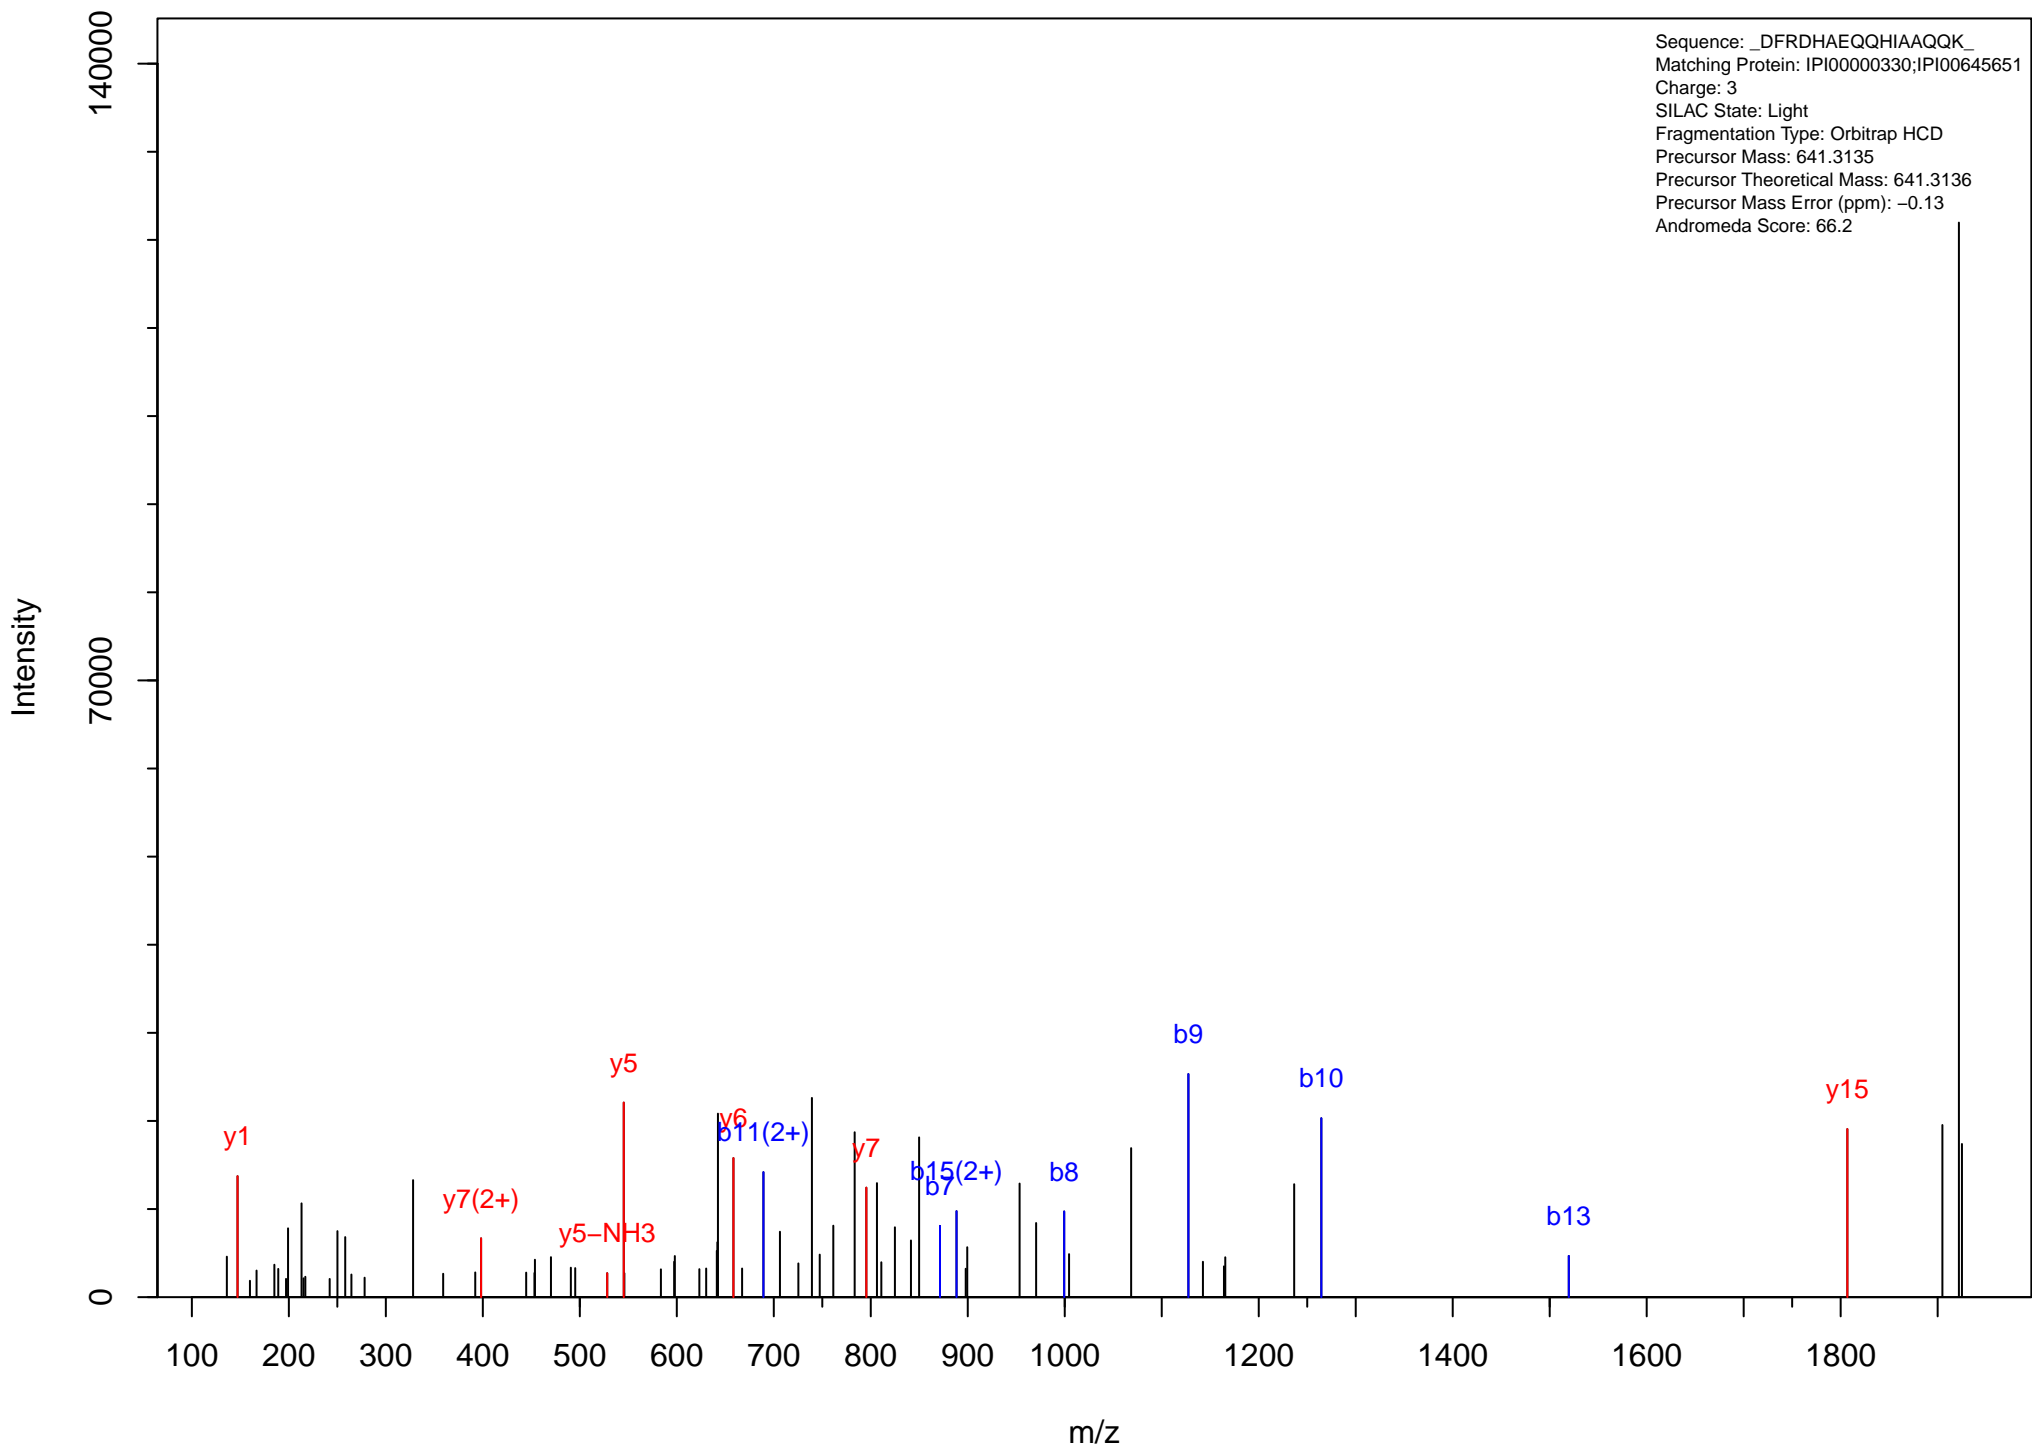

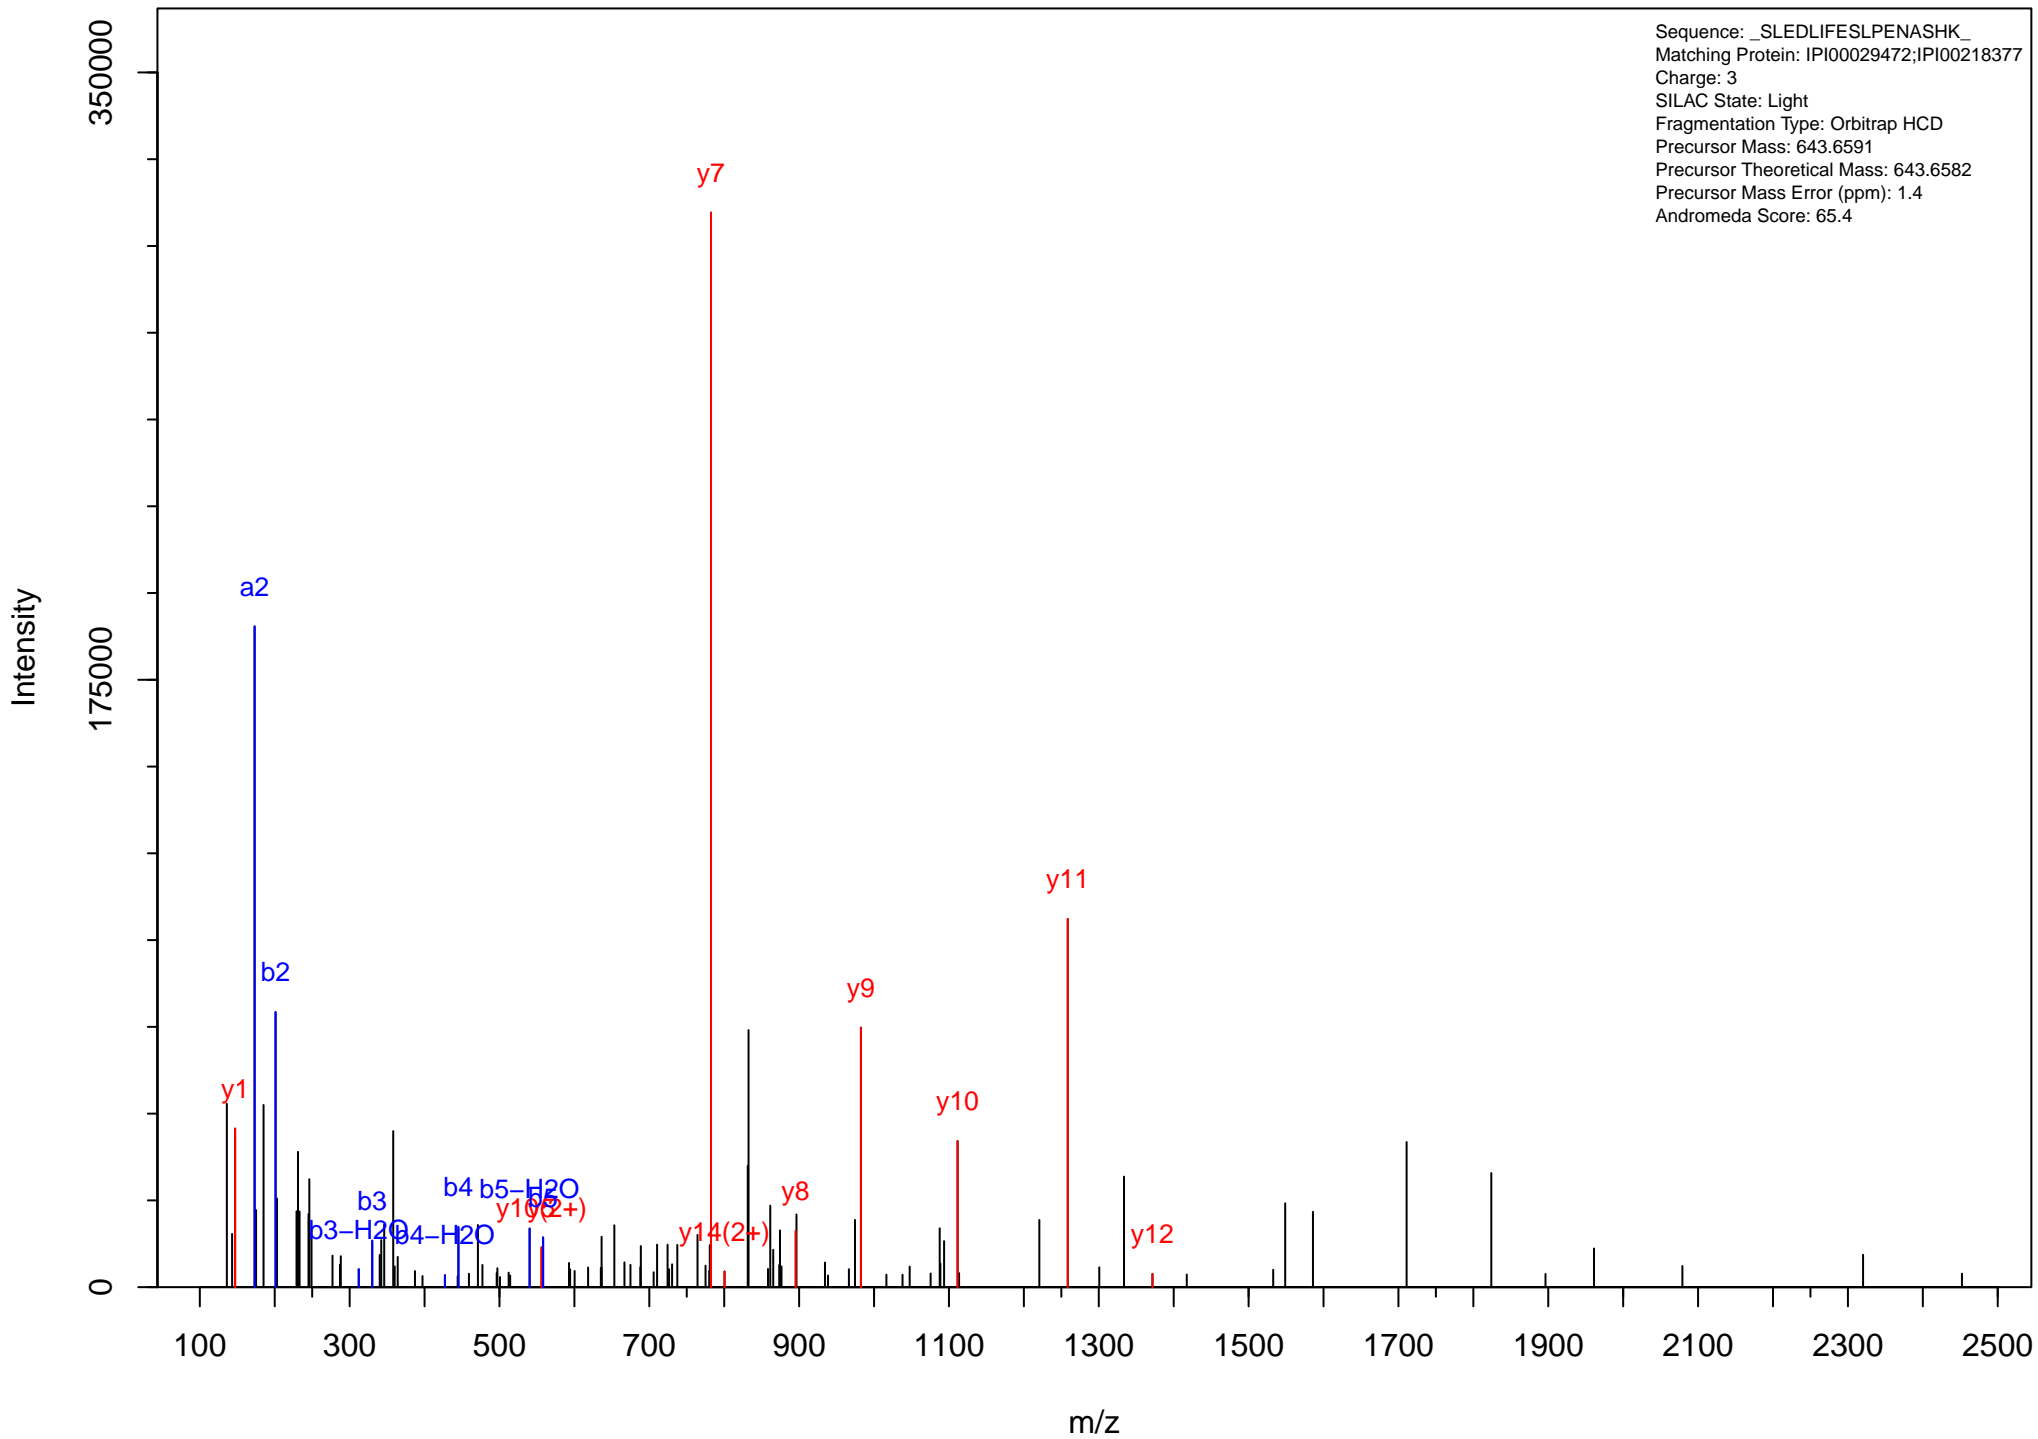

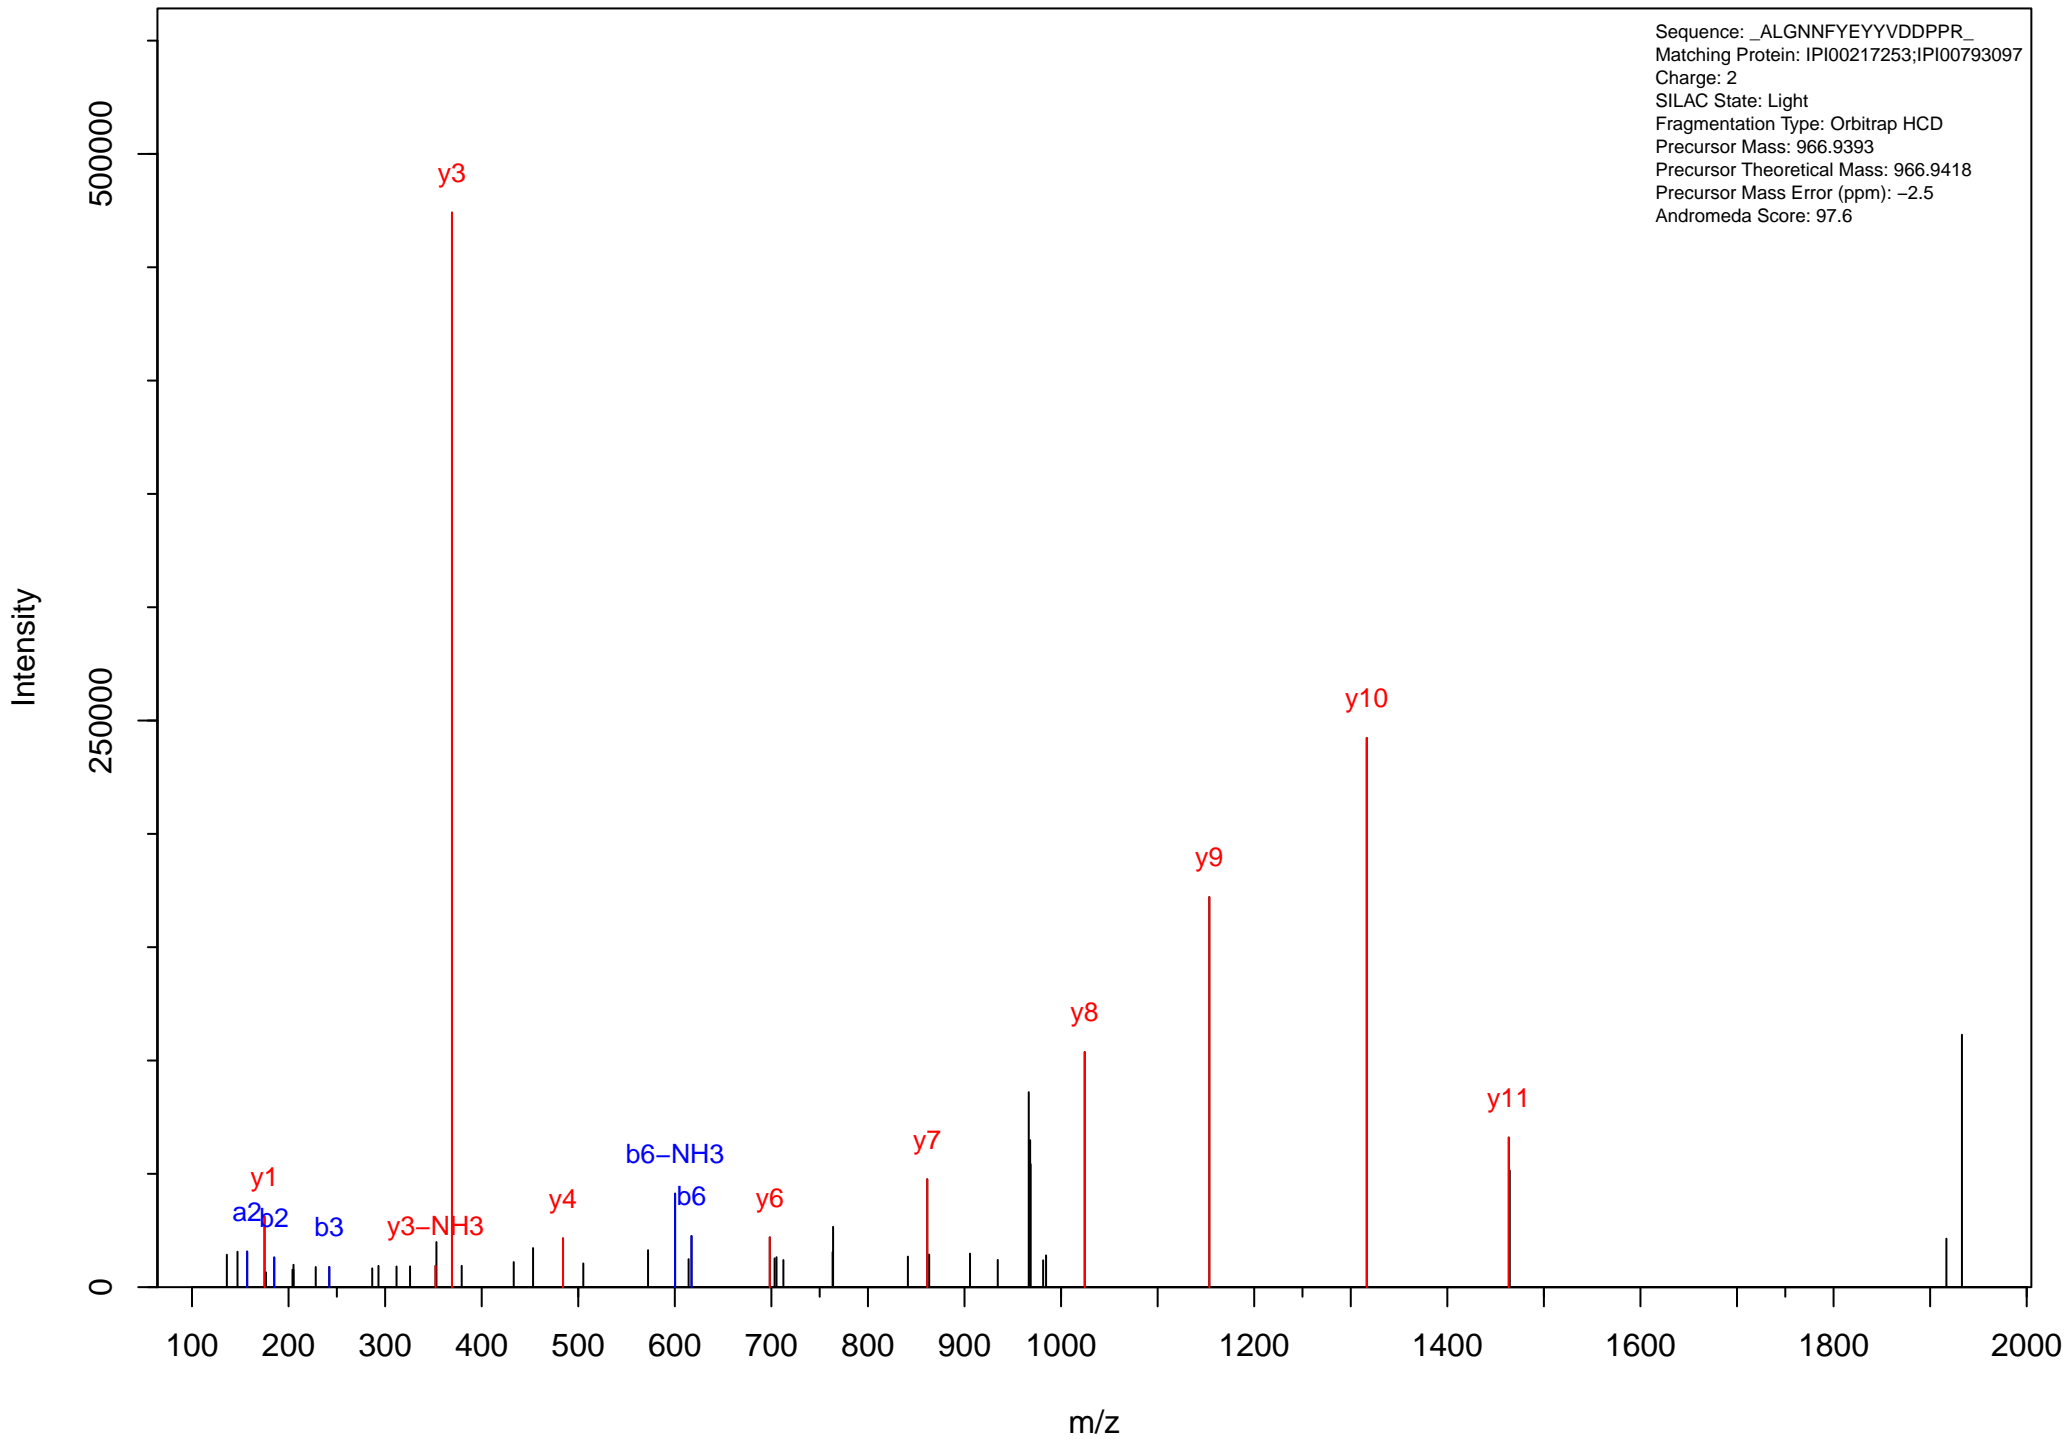

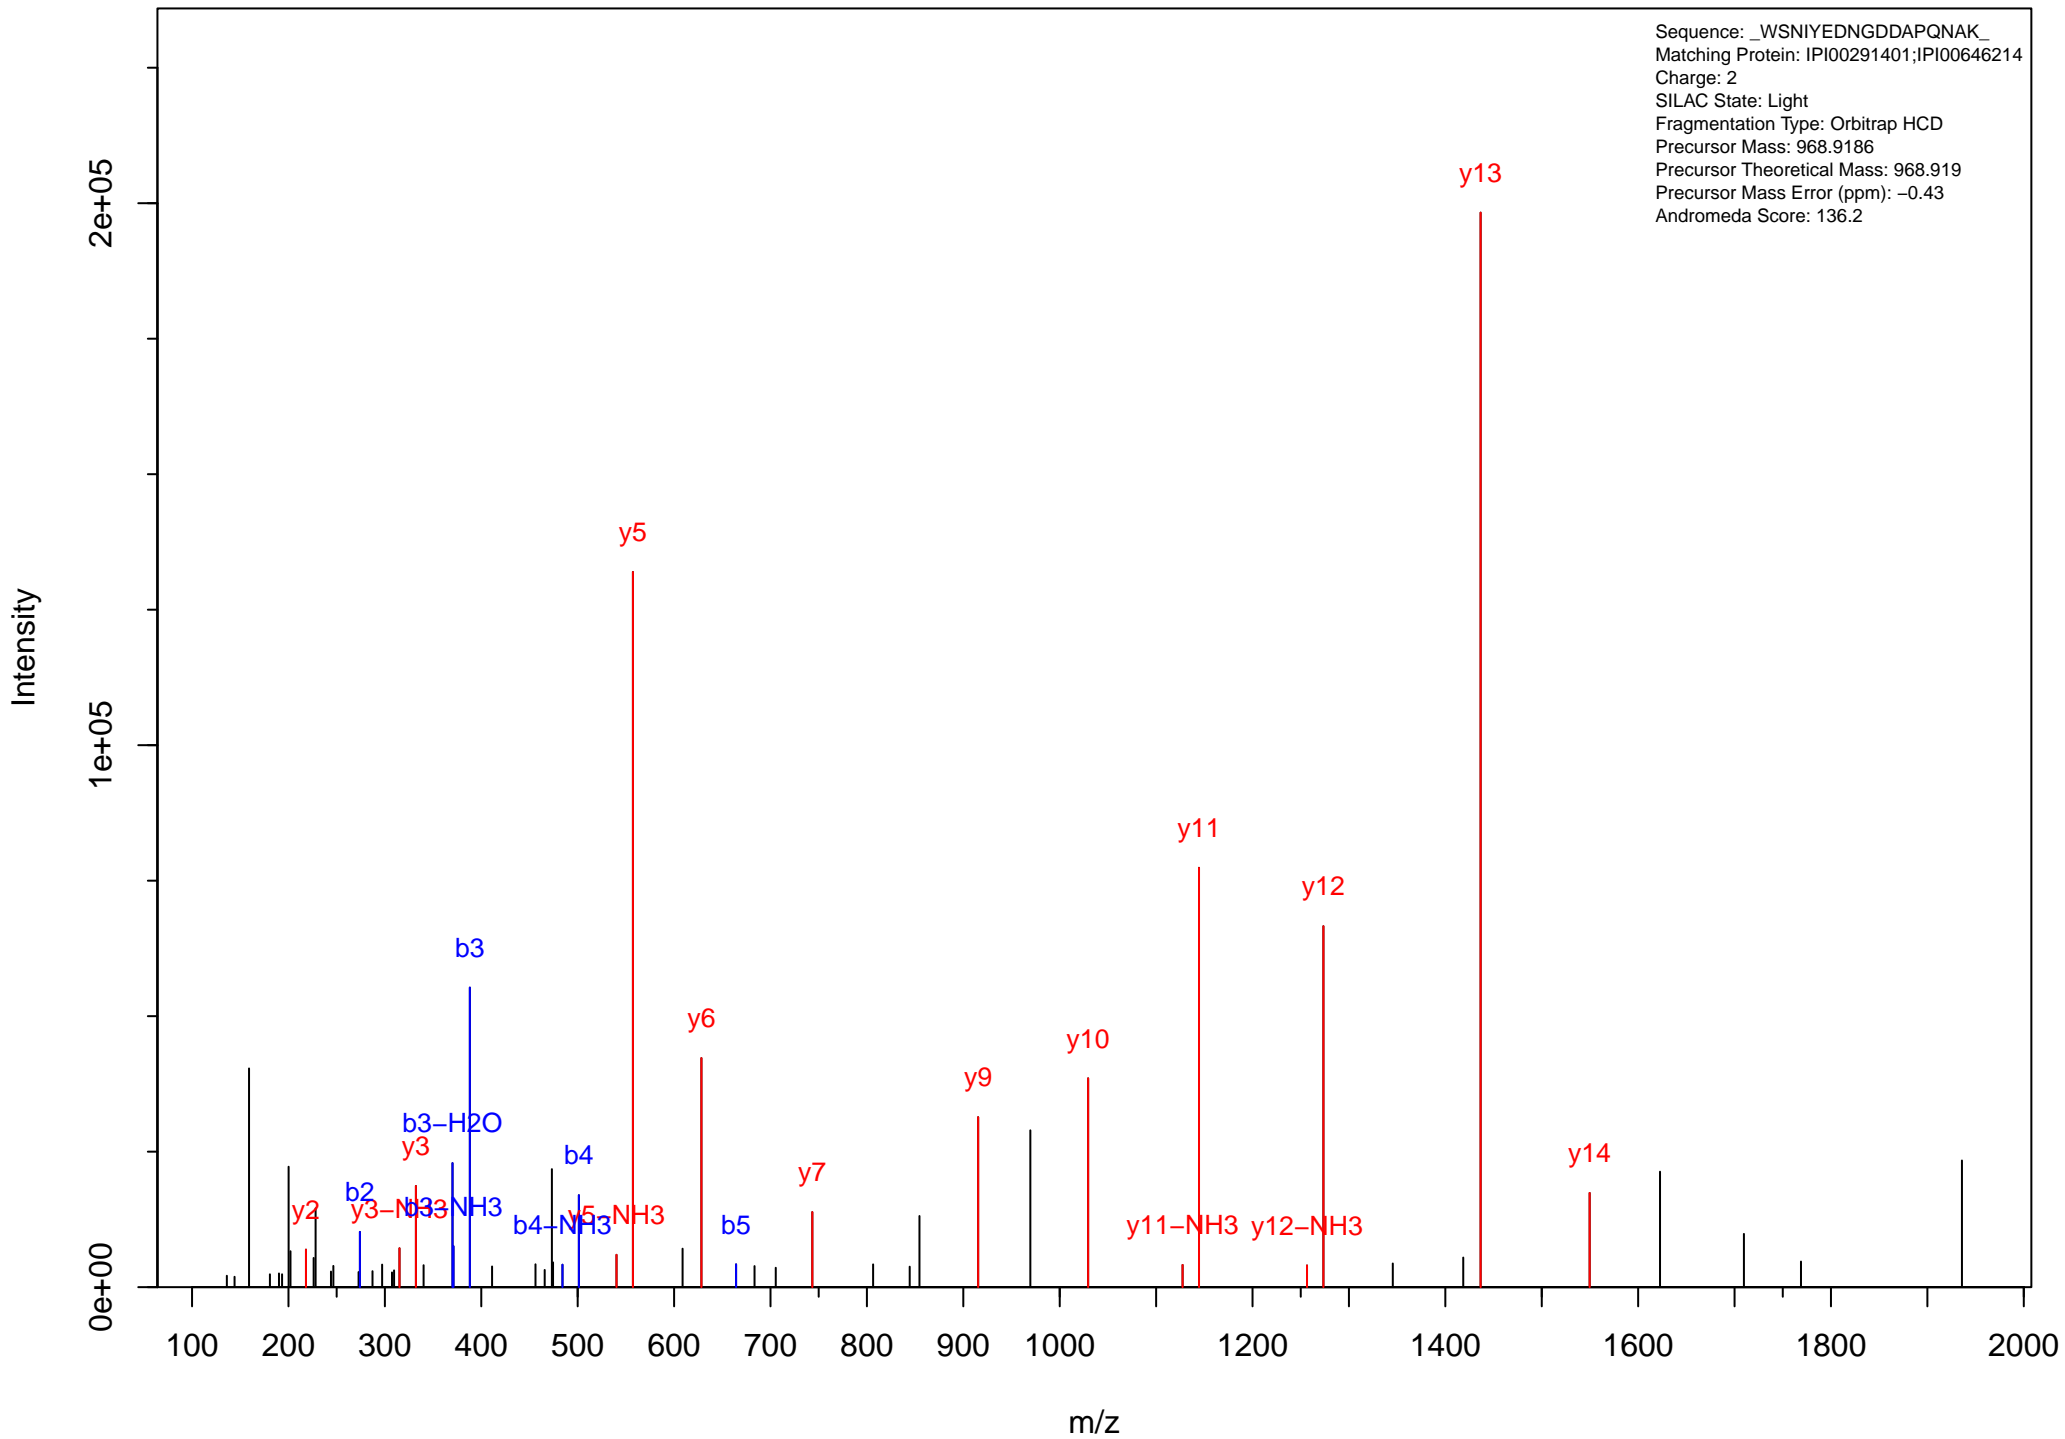

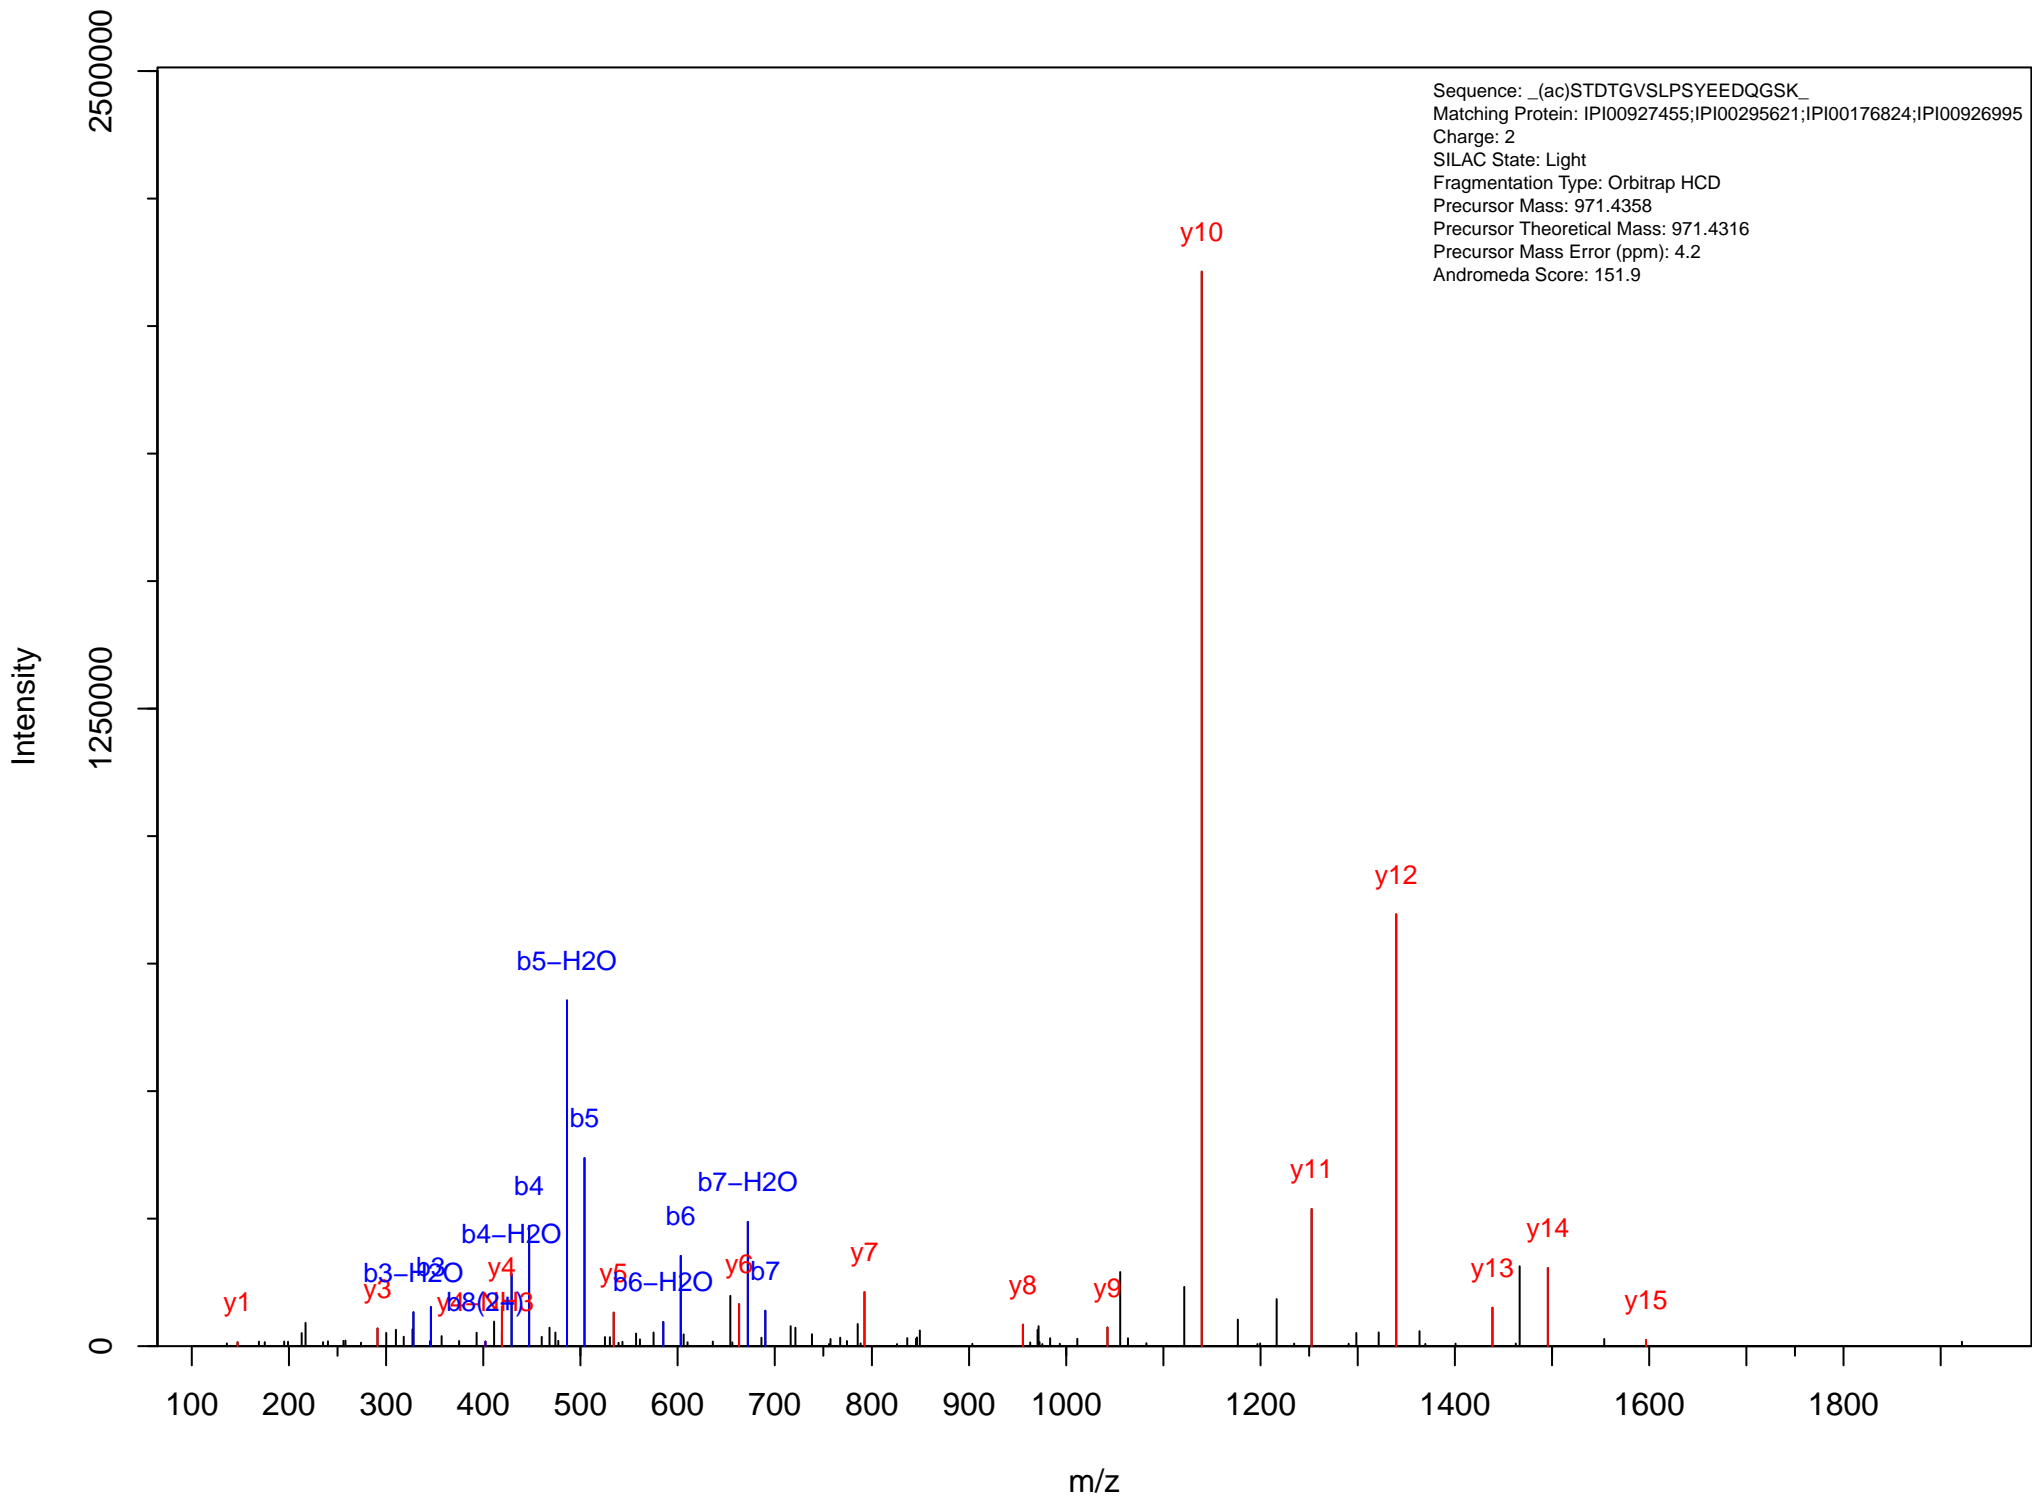

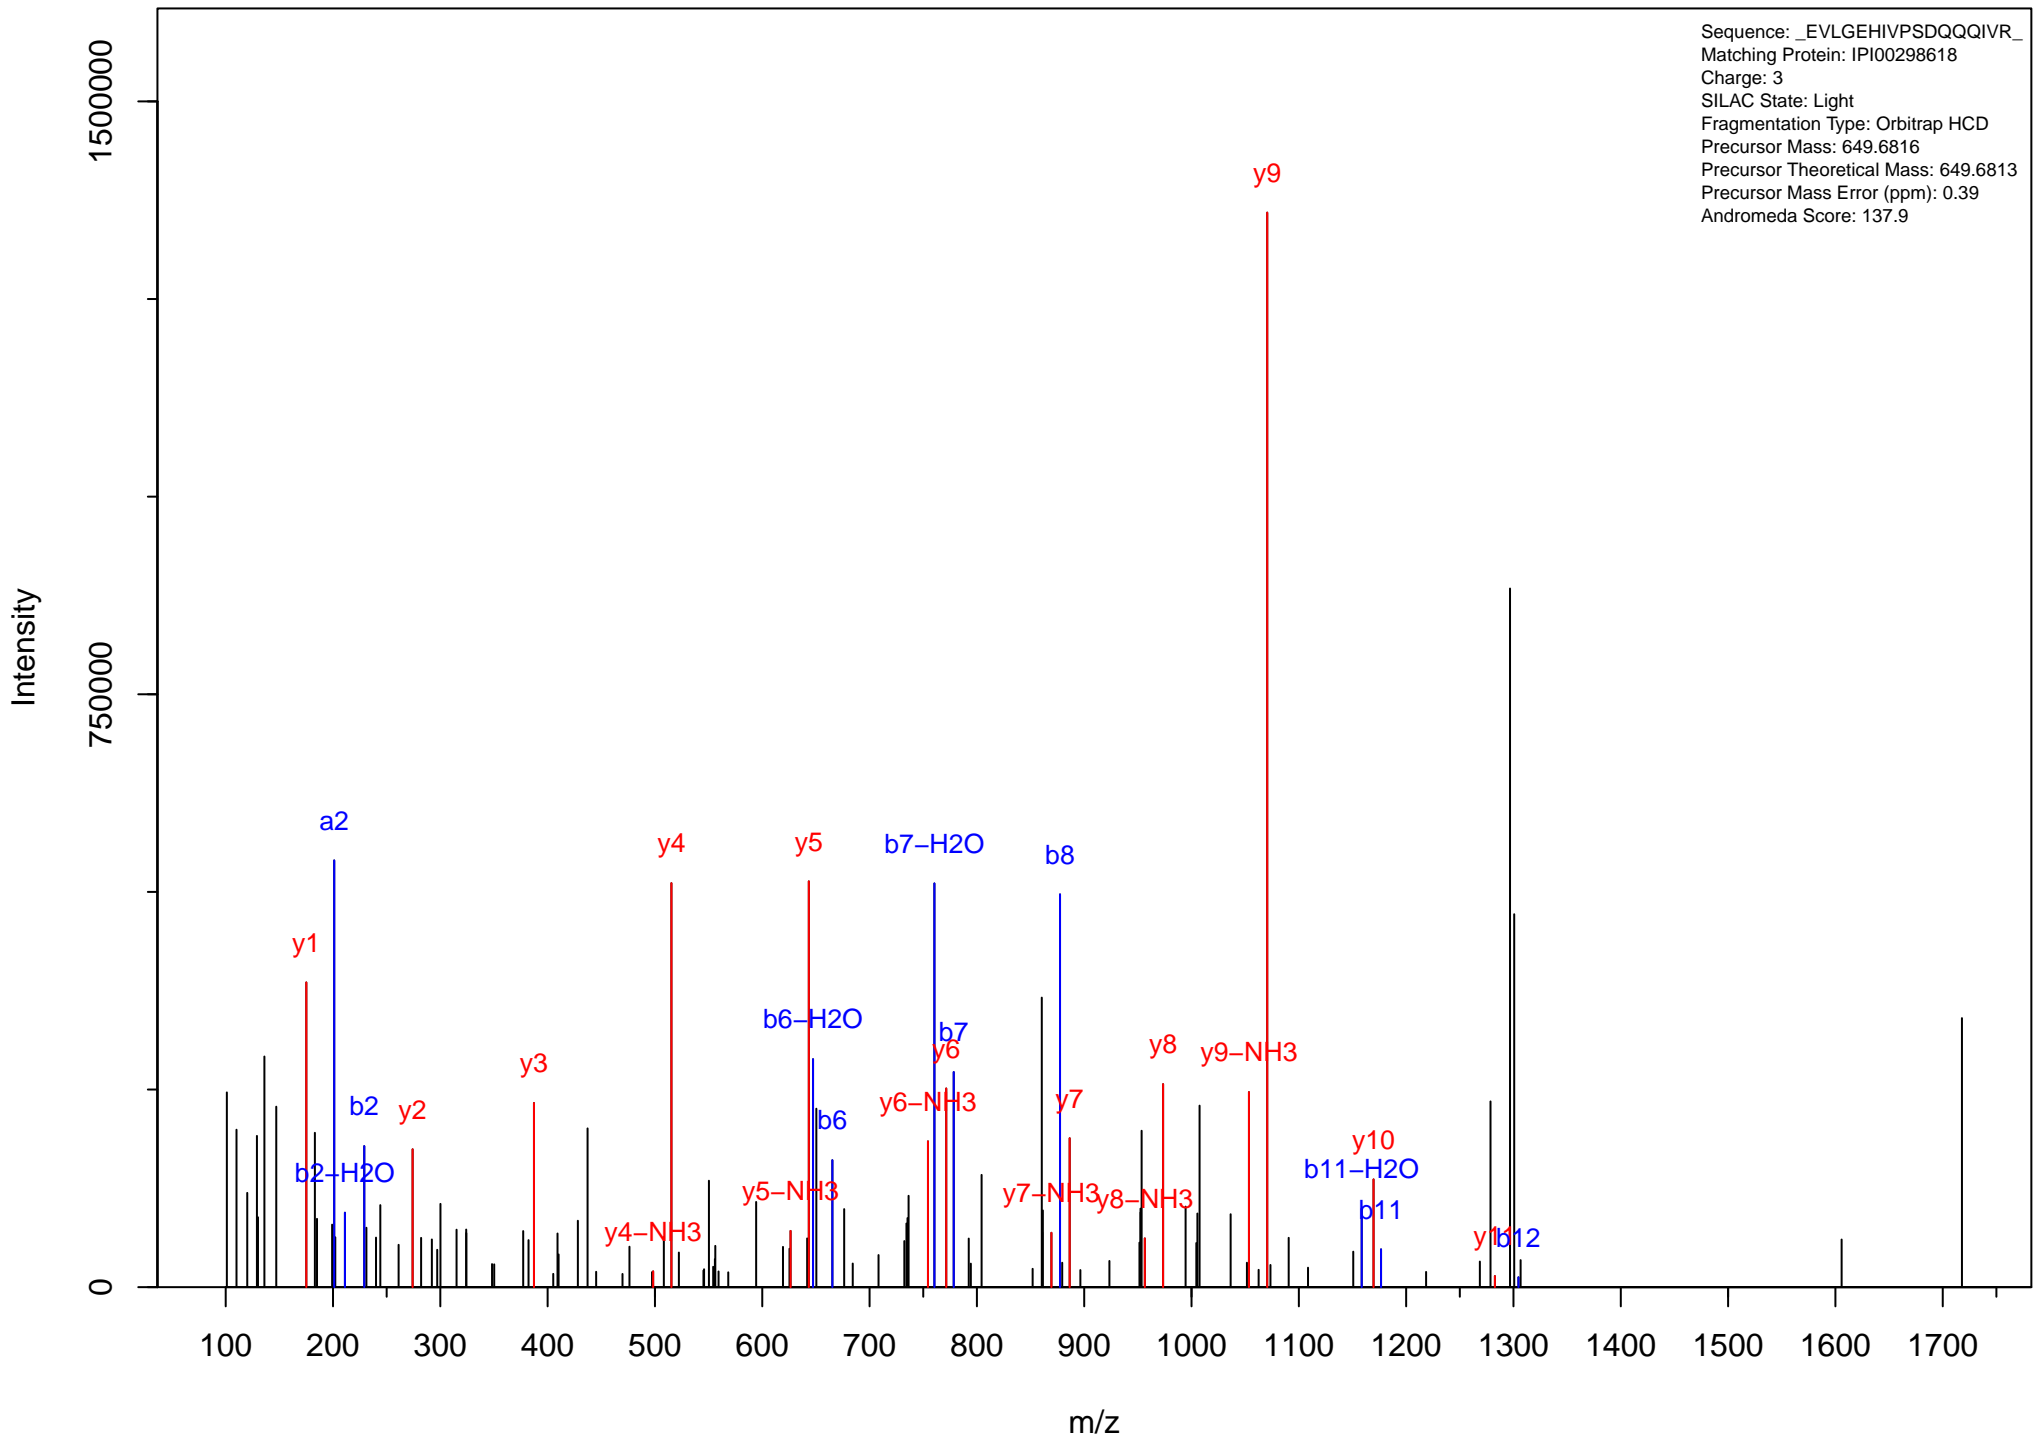

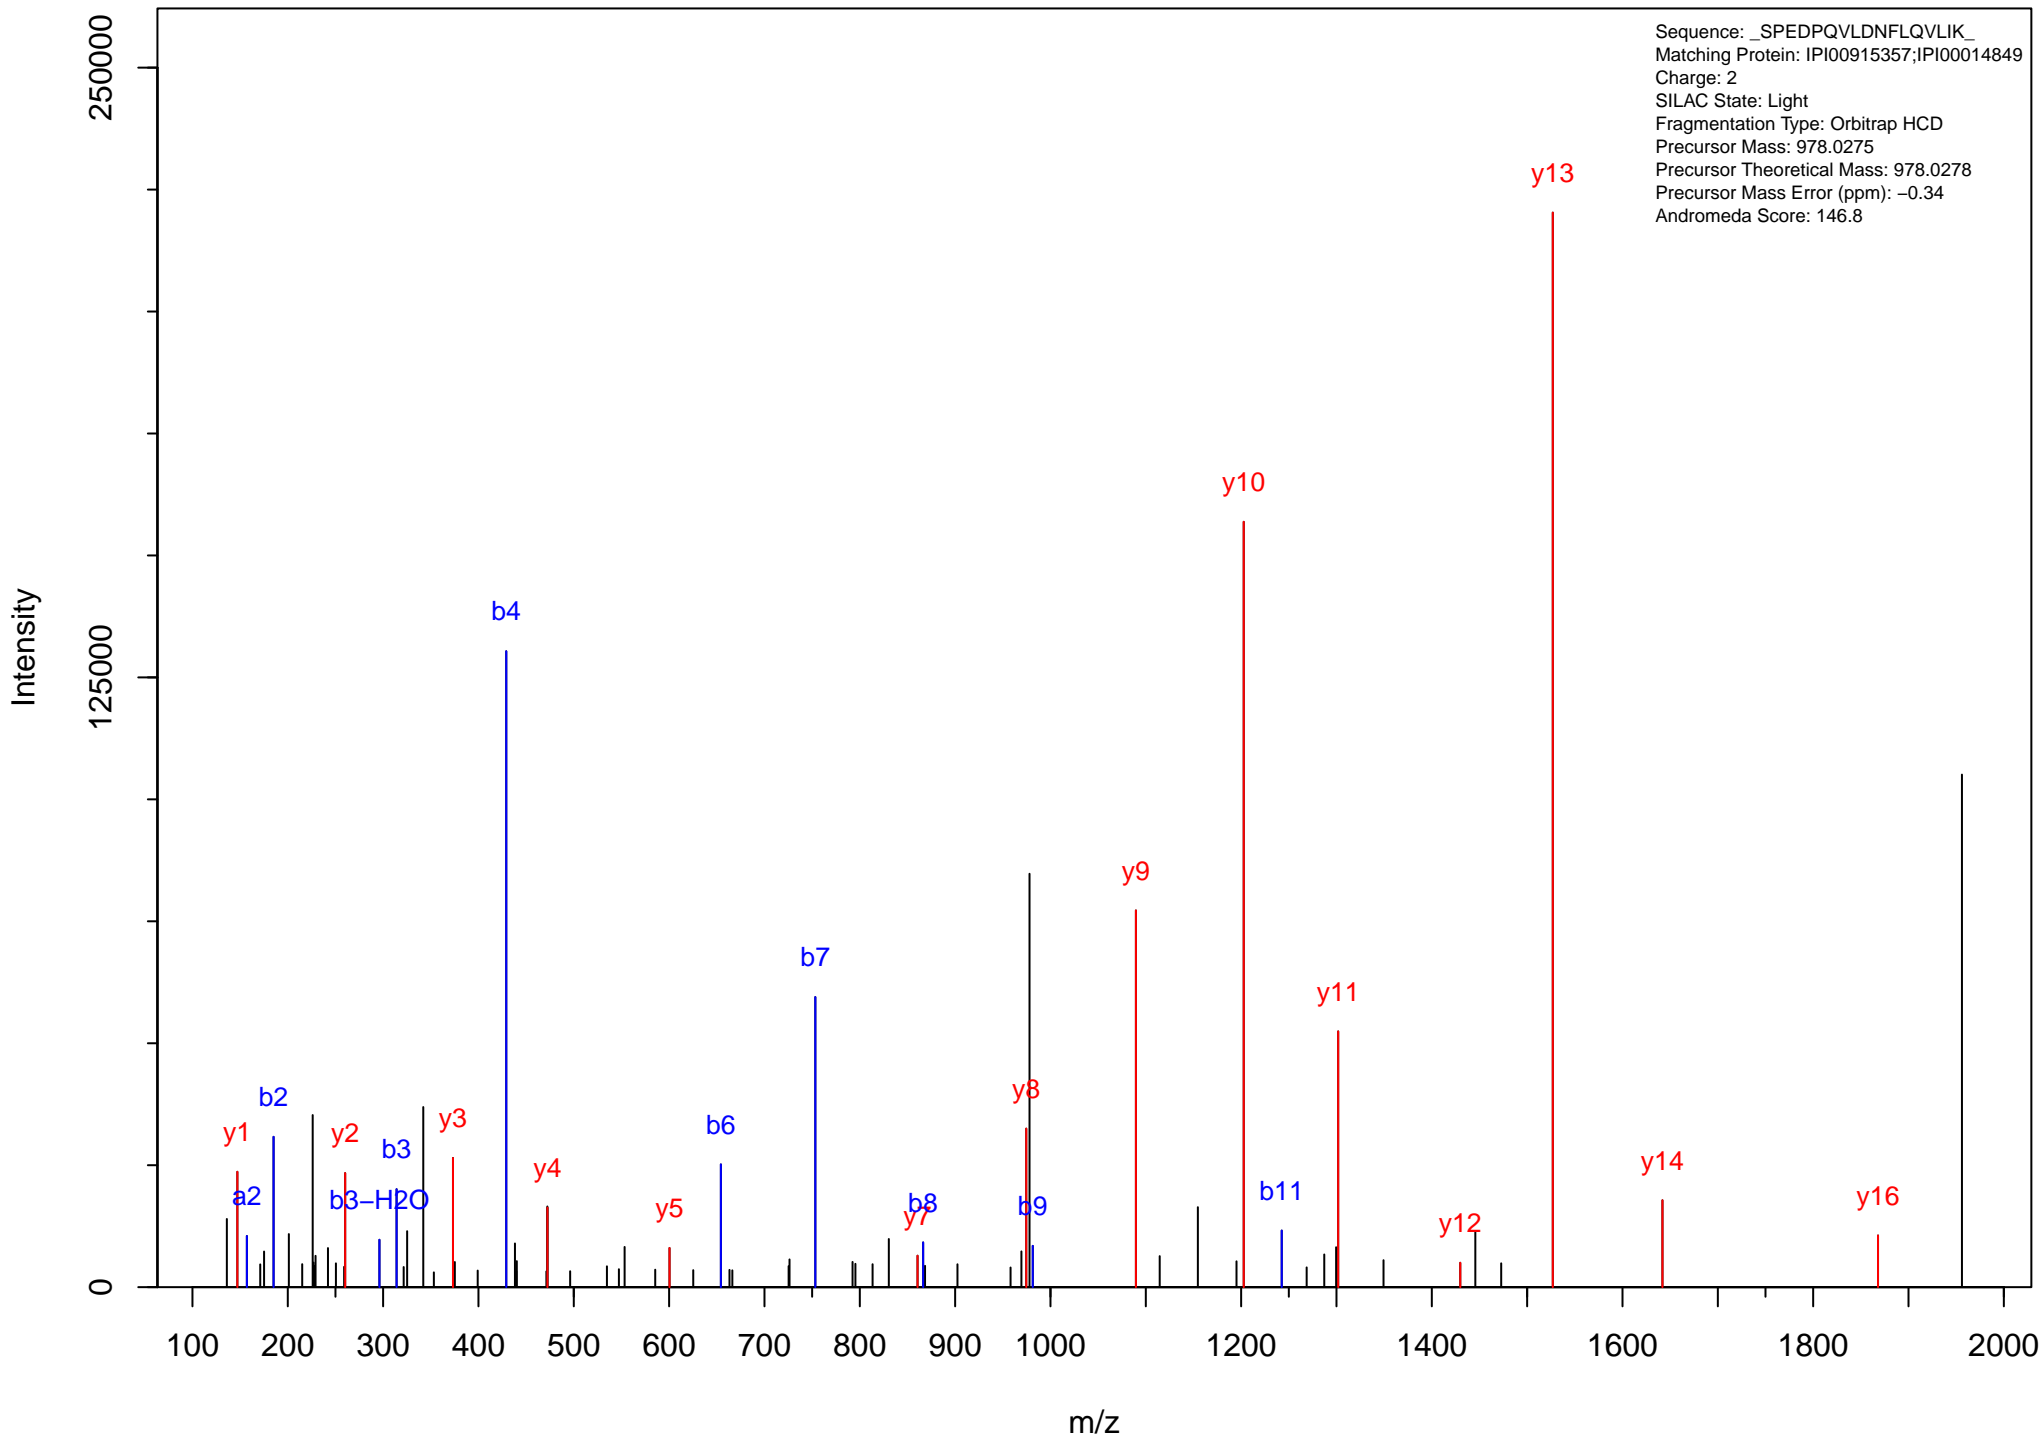

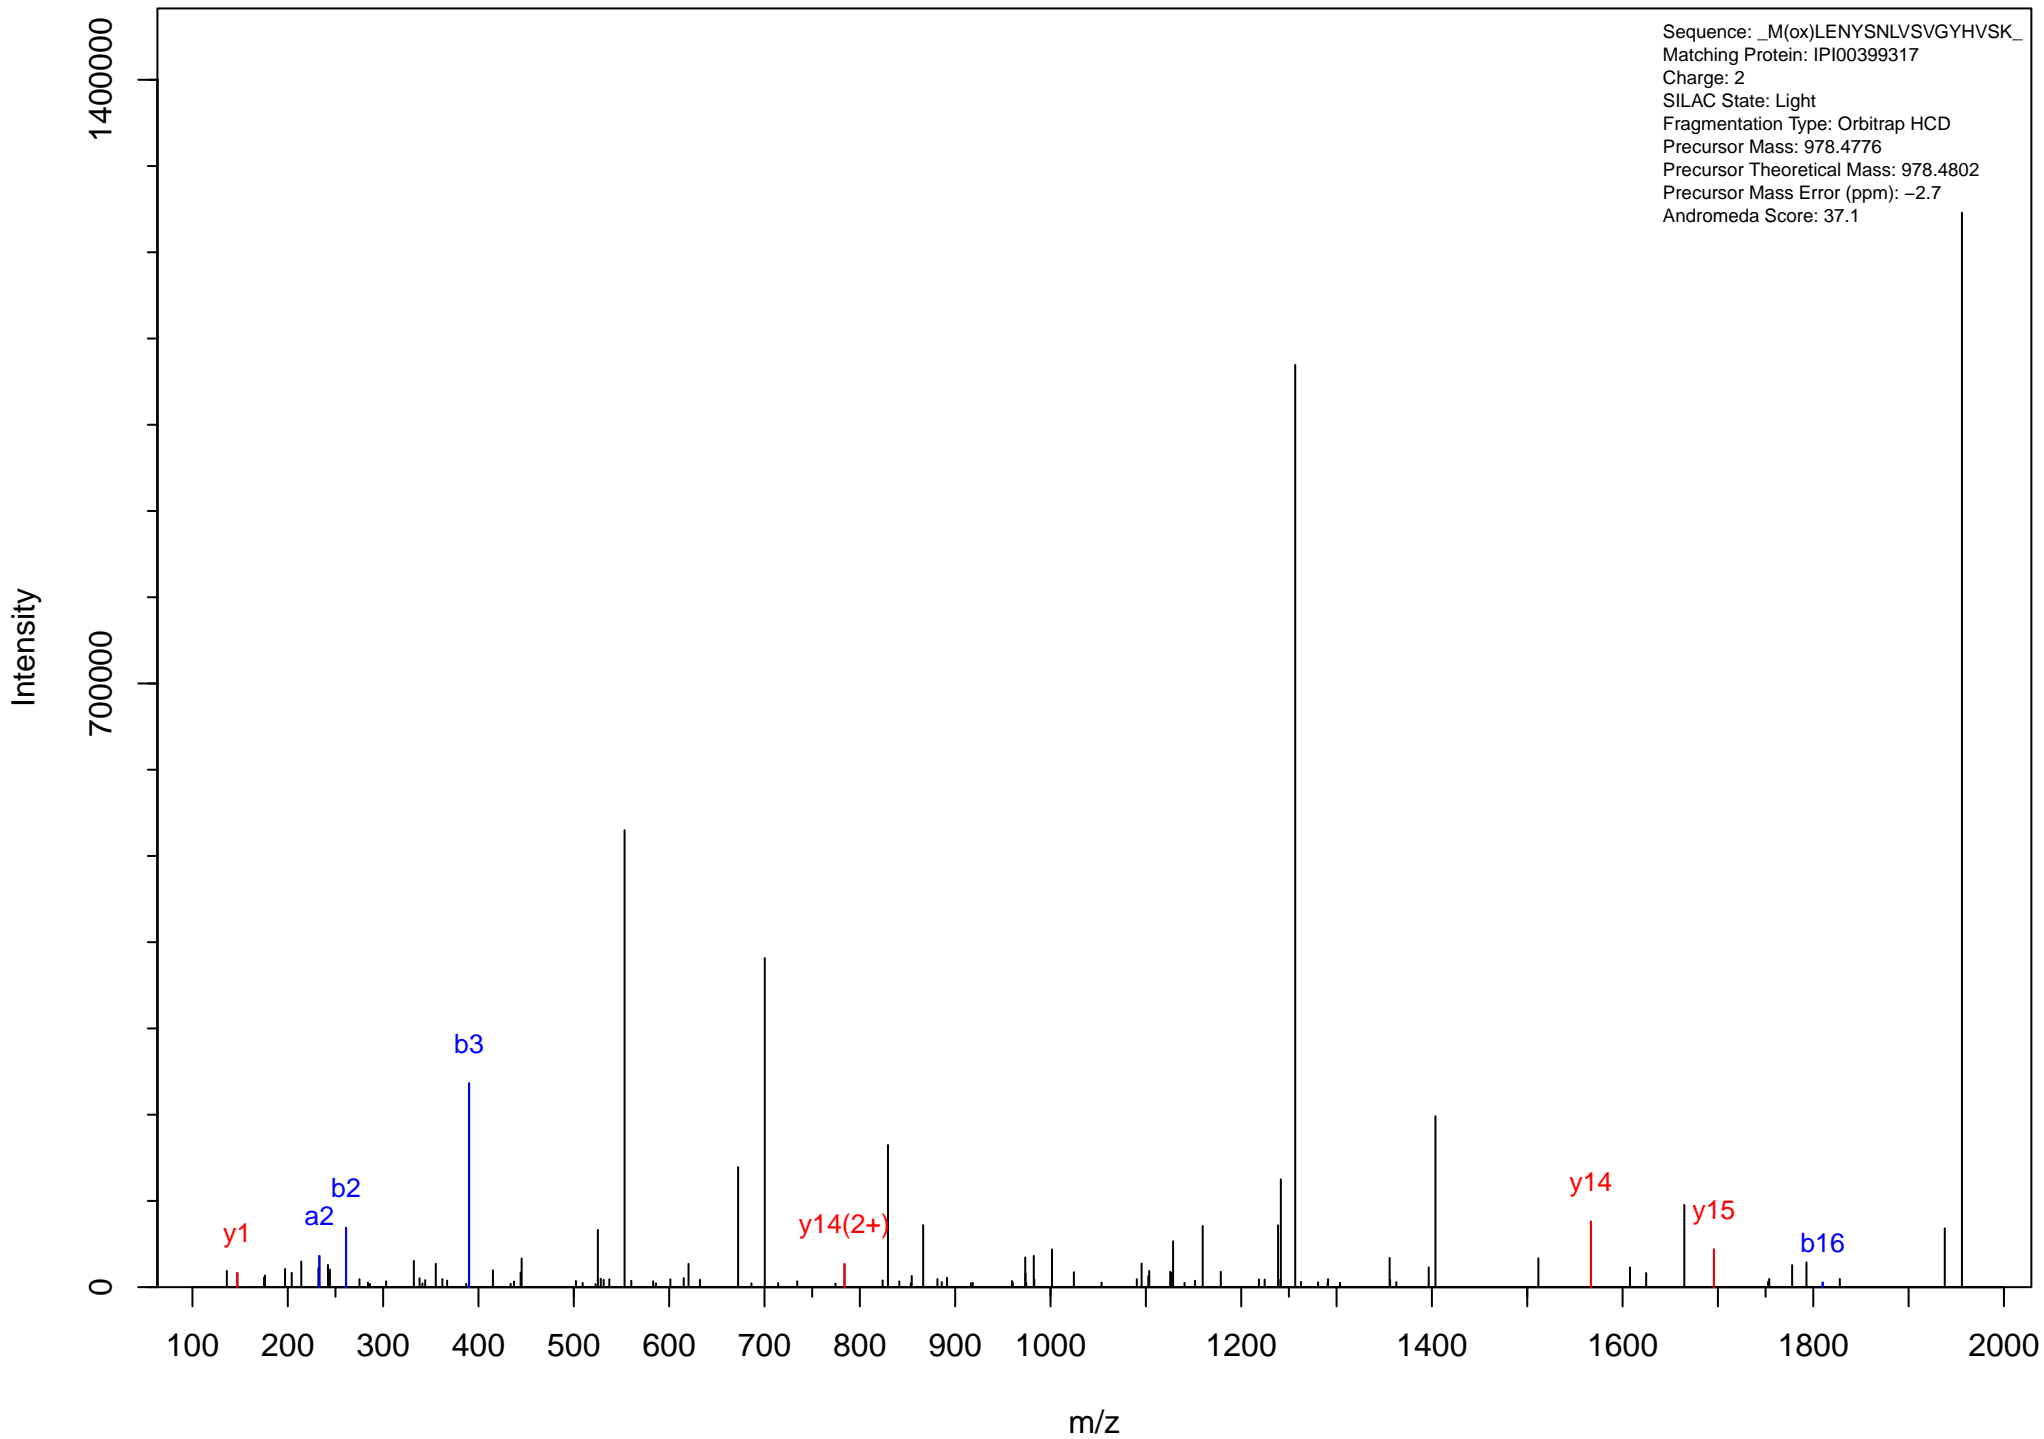

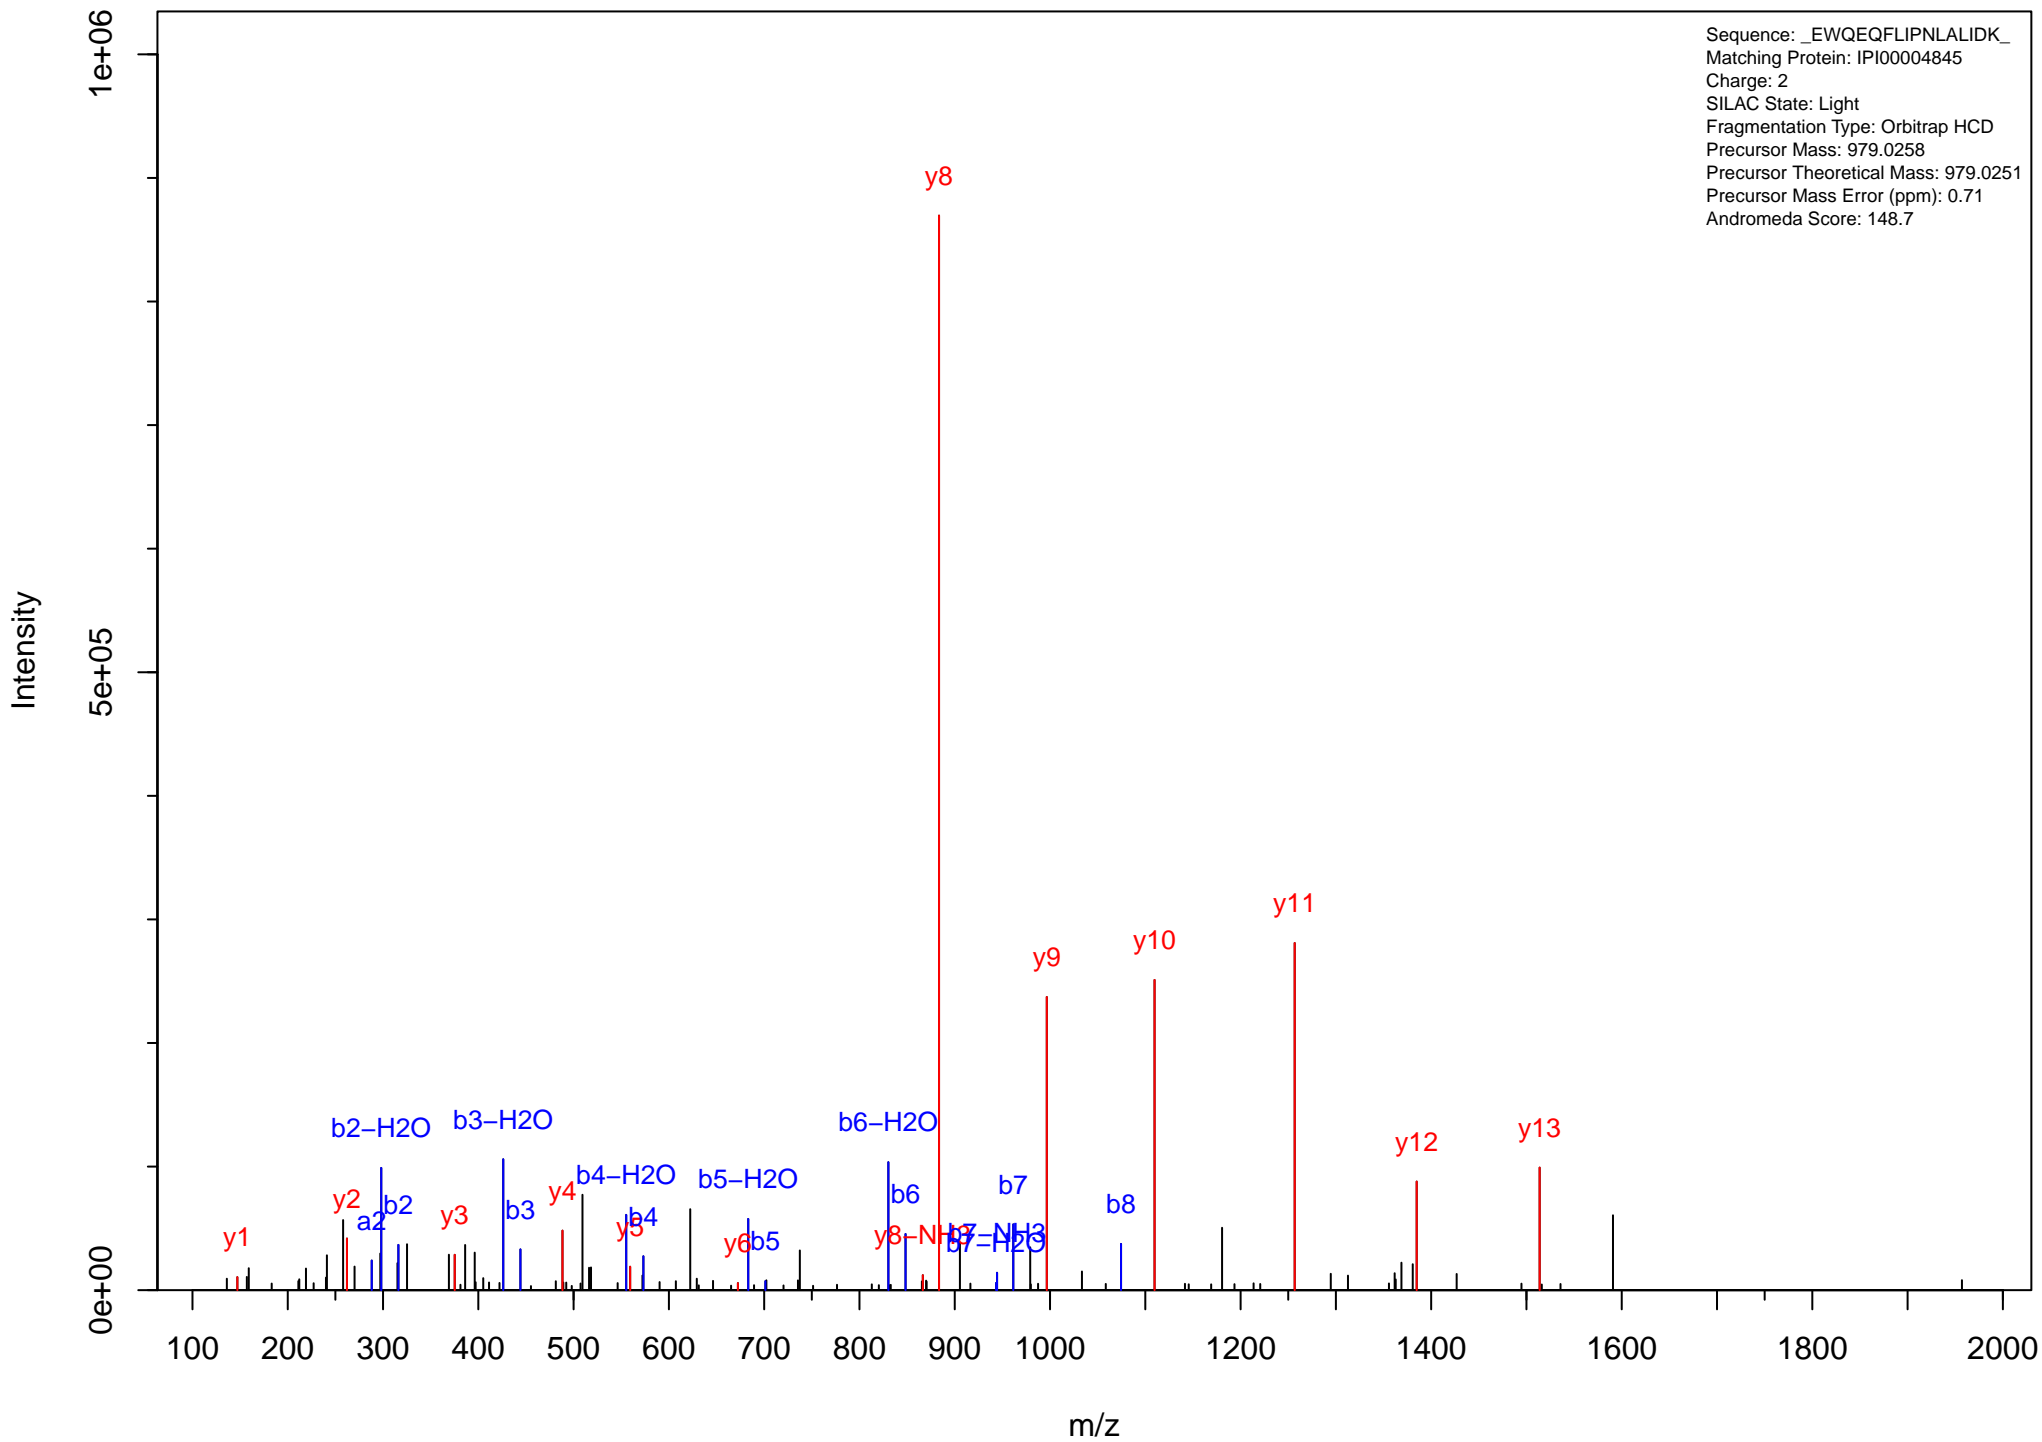

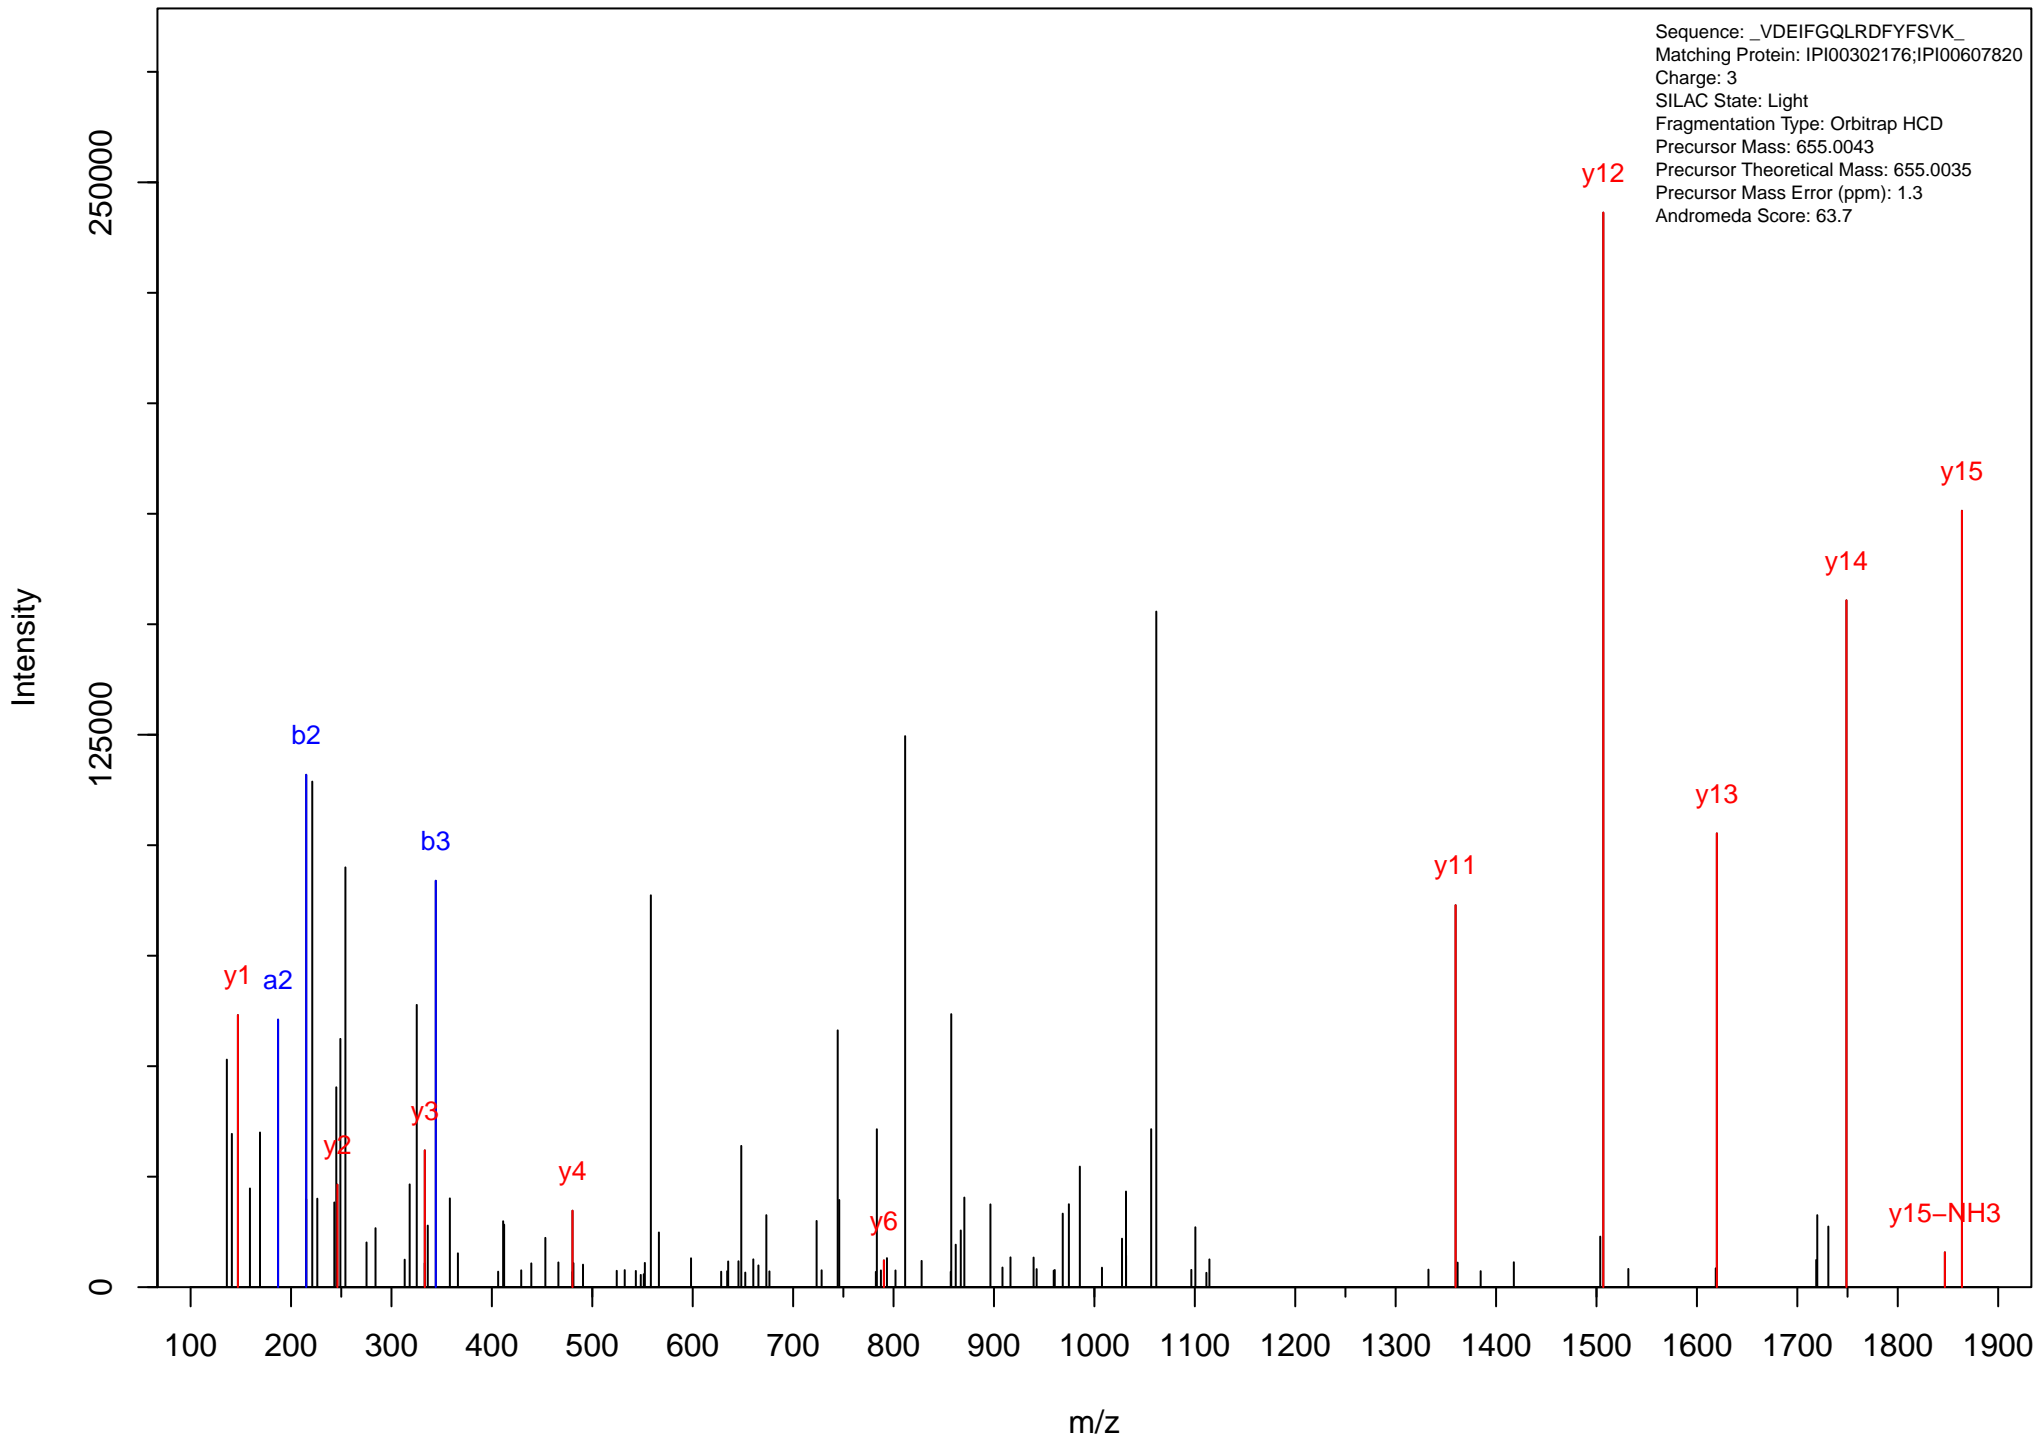

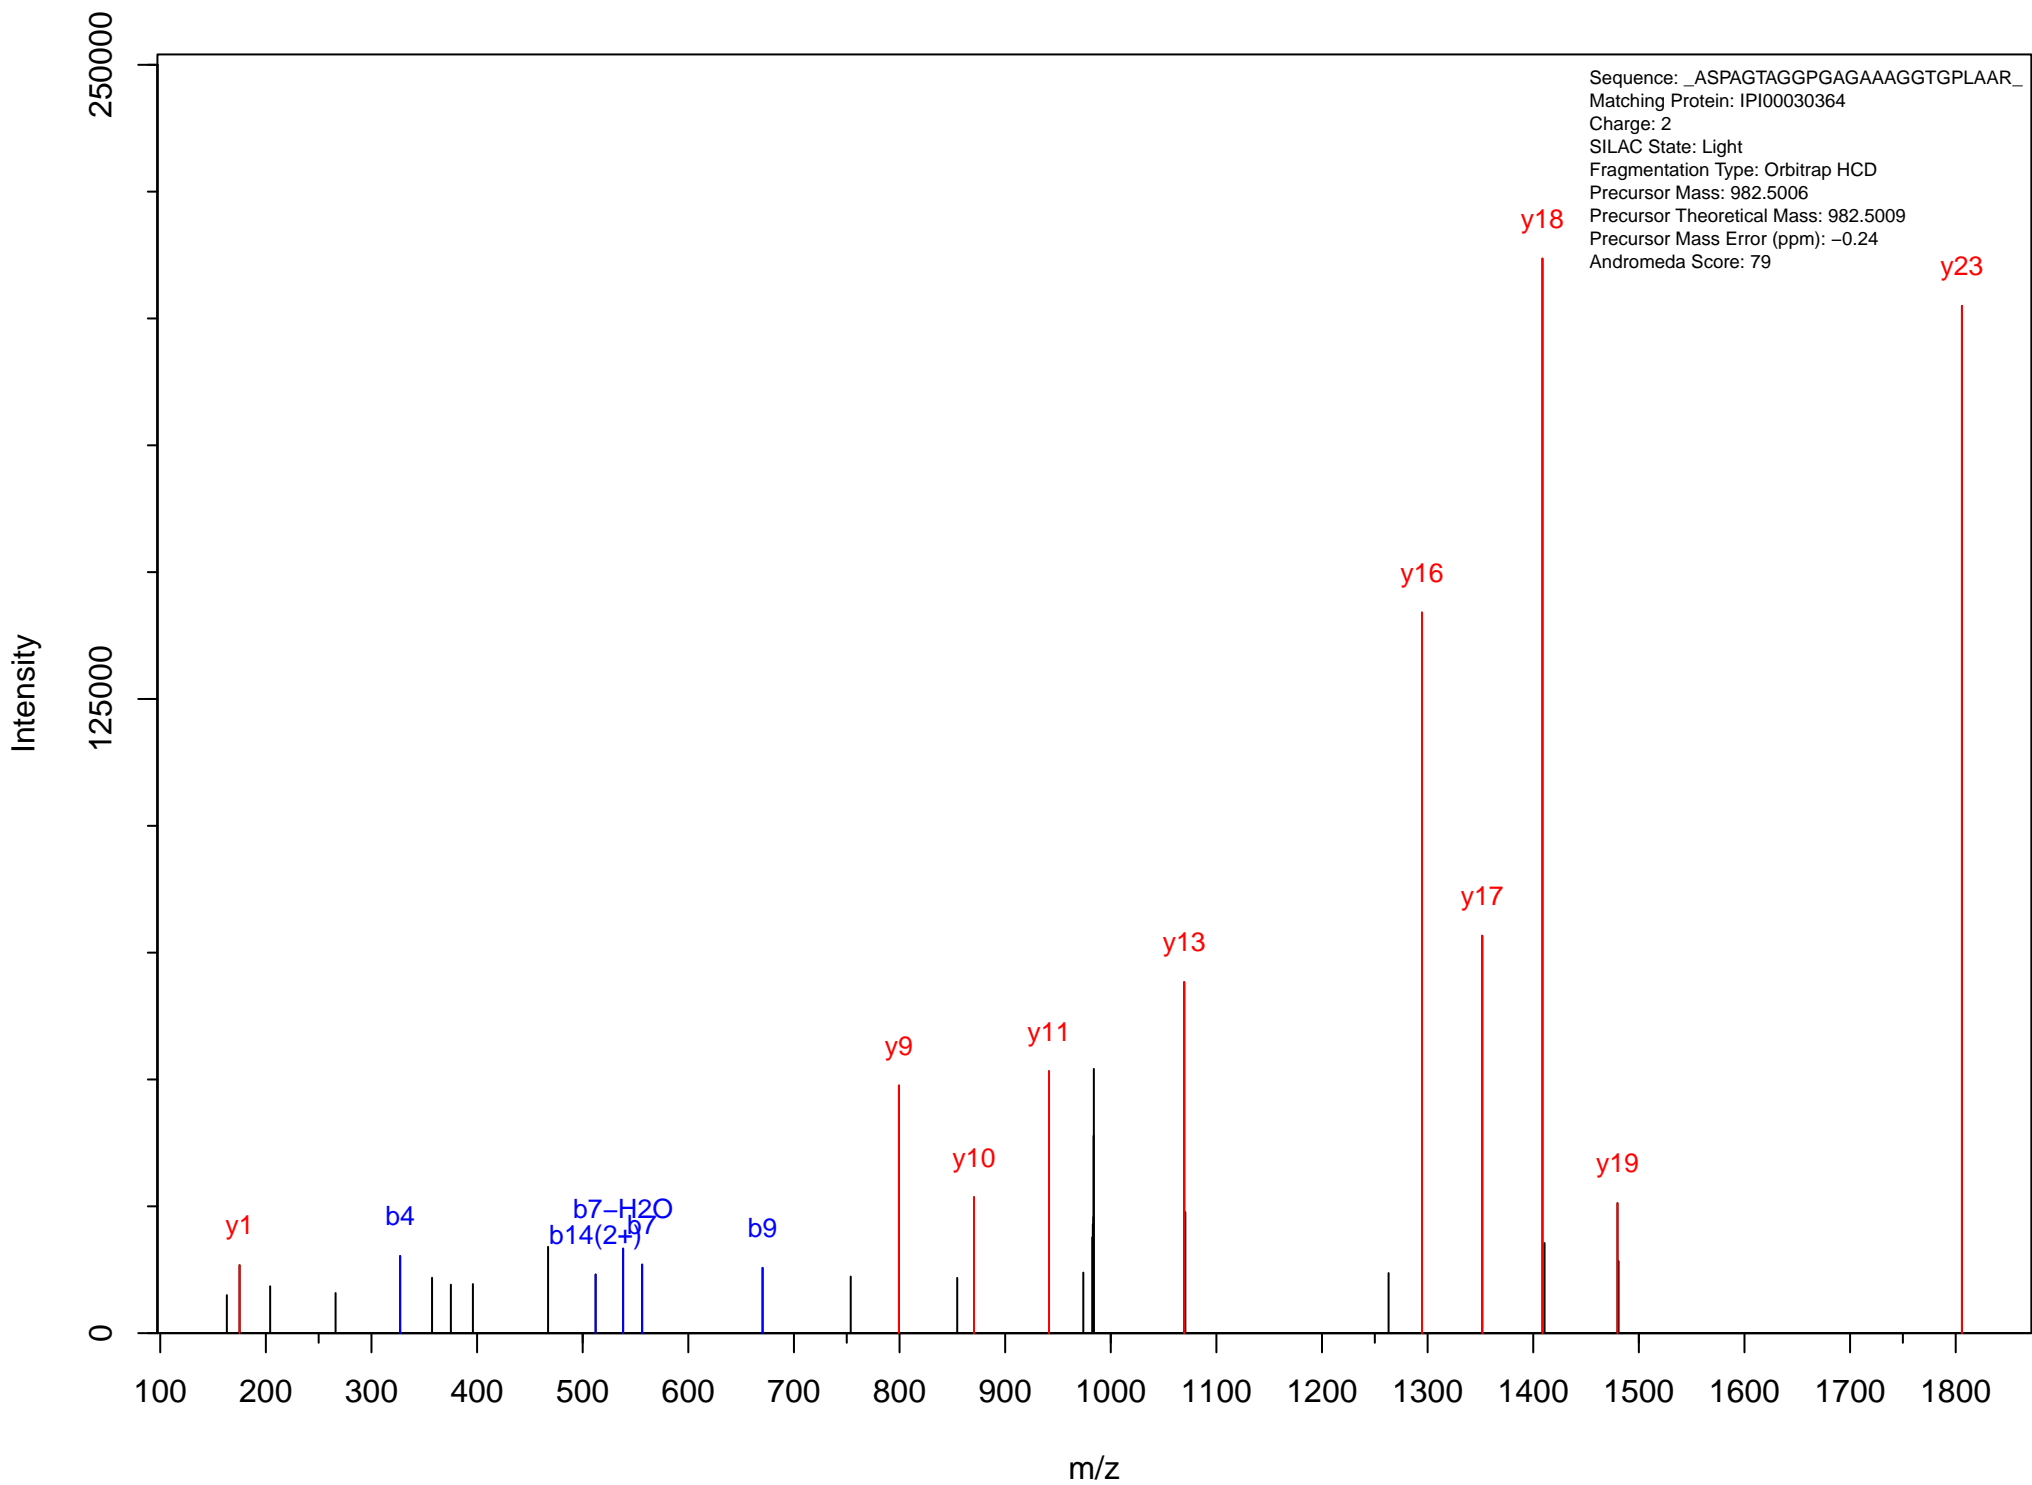

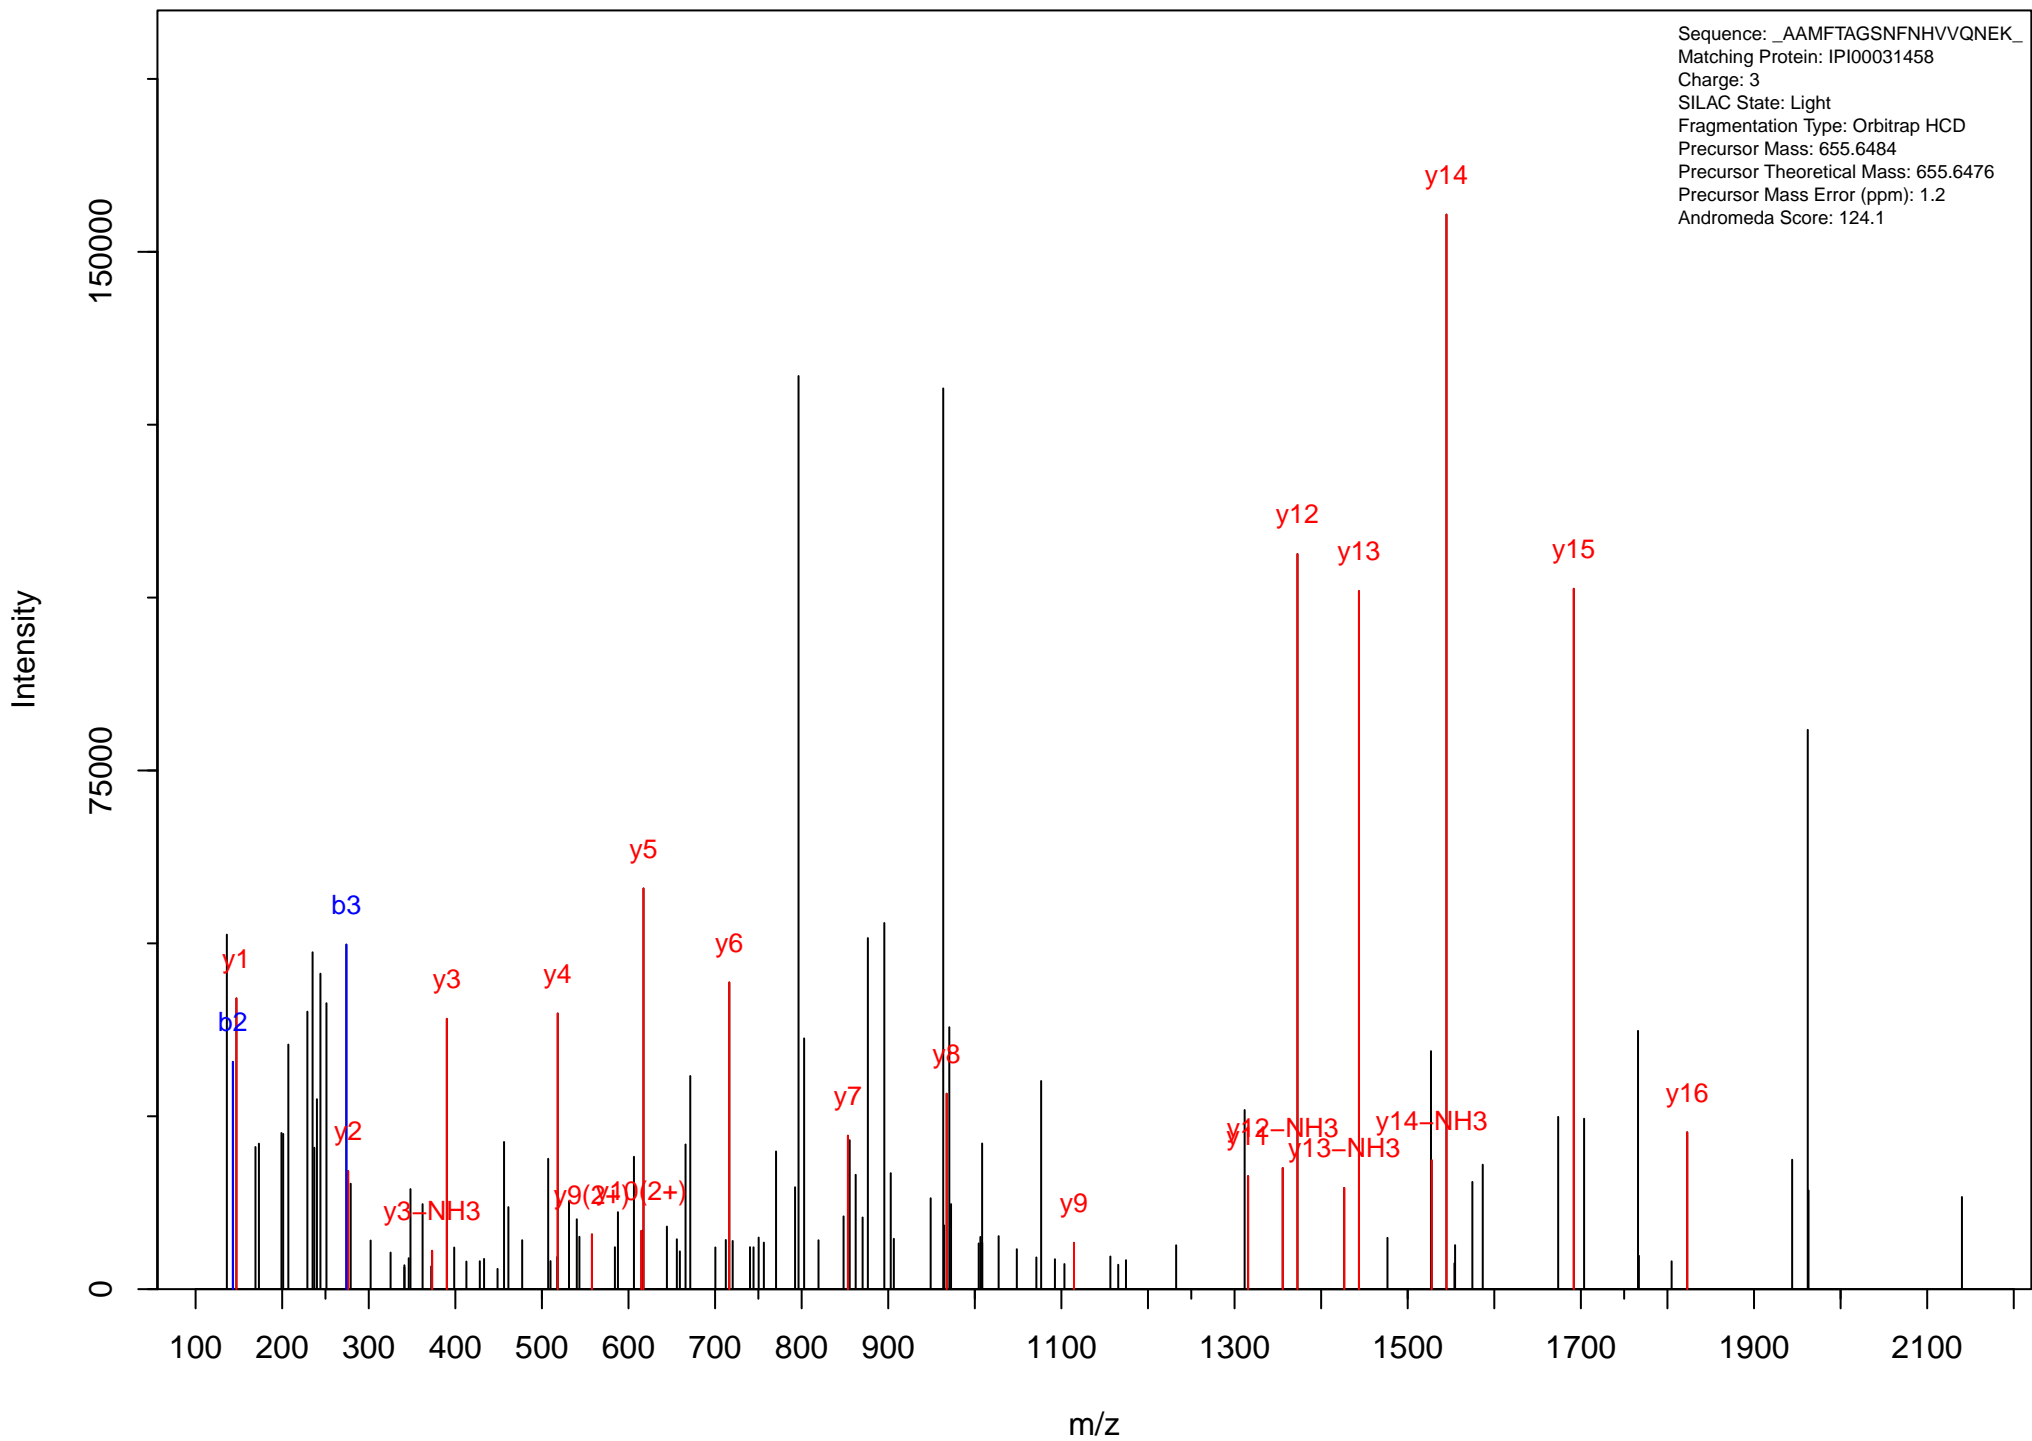

Intensity

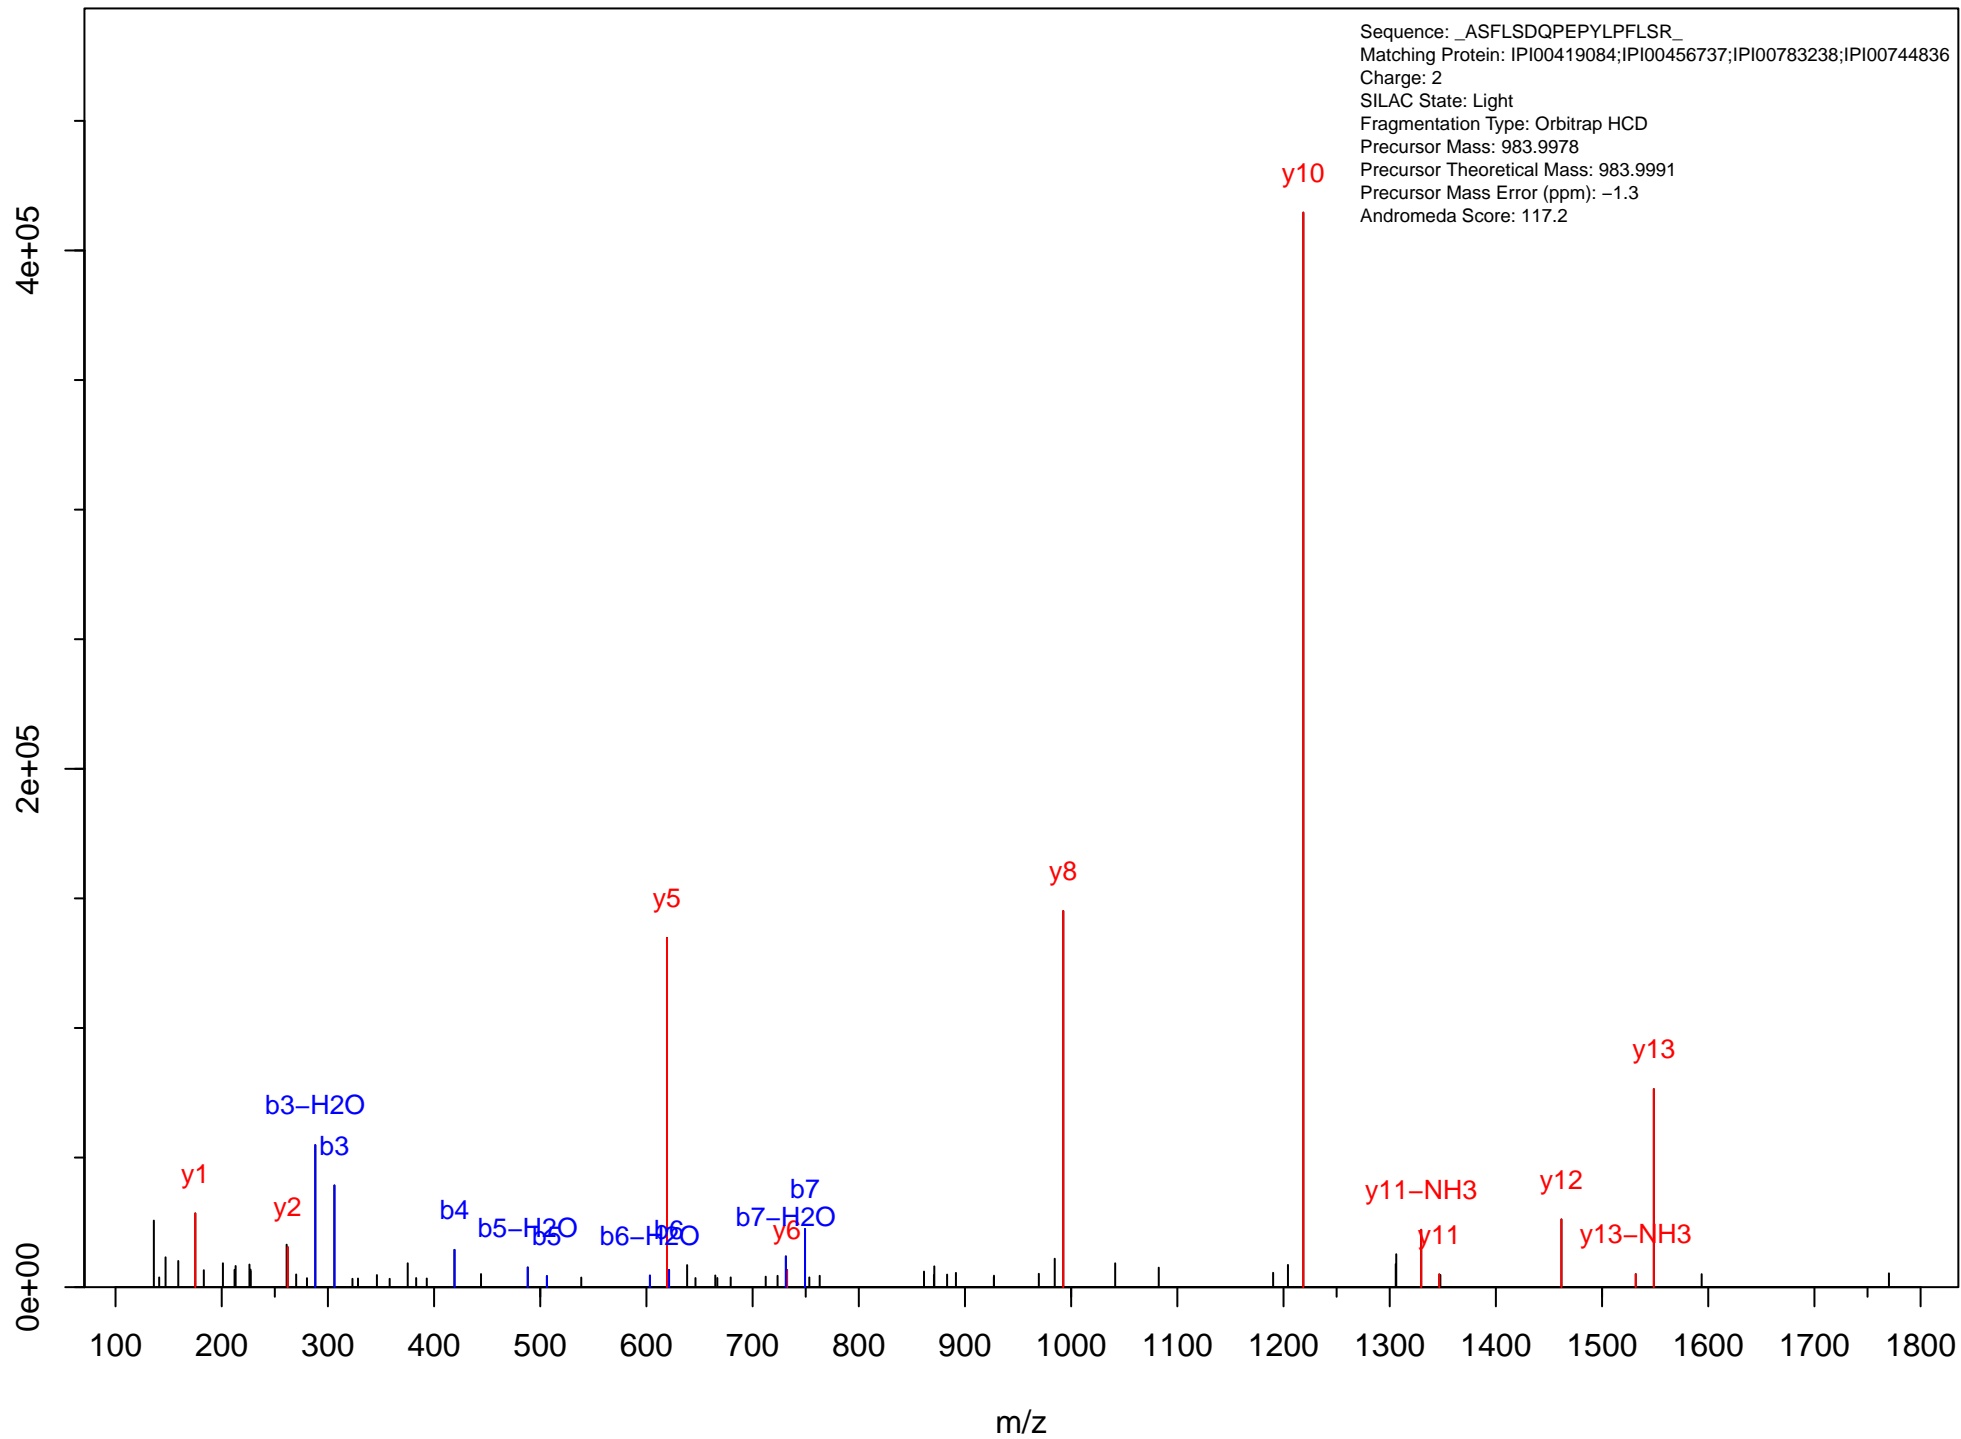

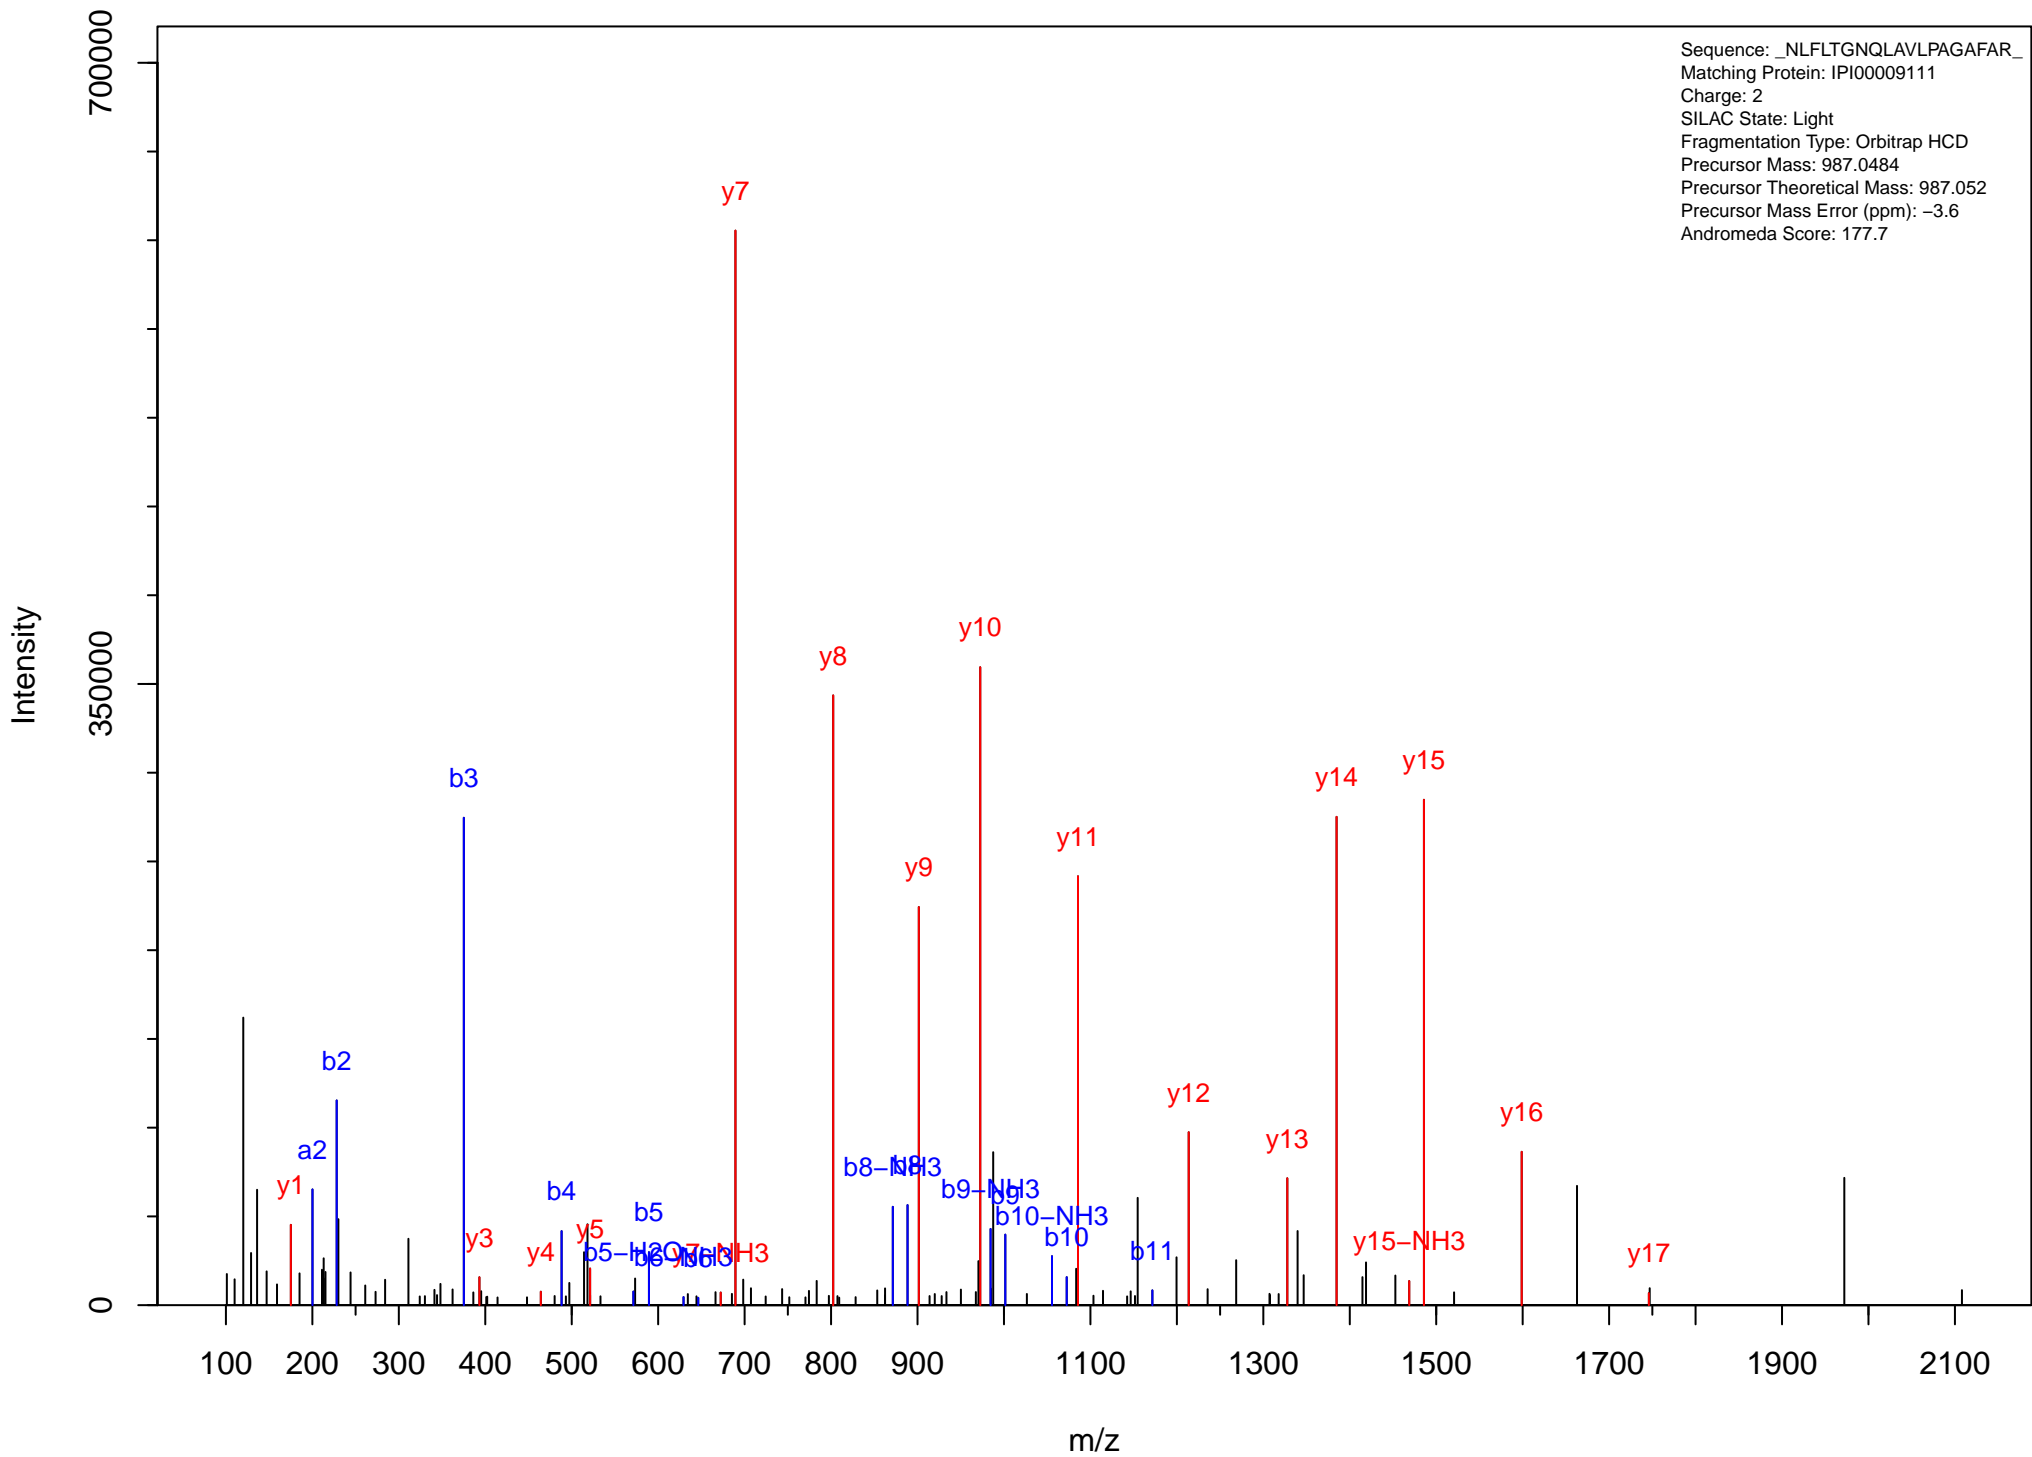

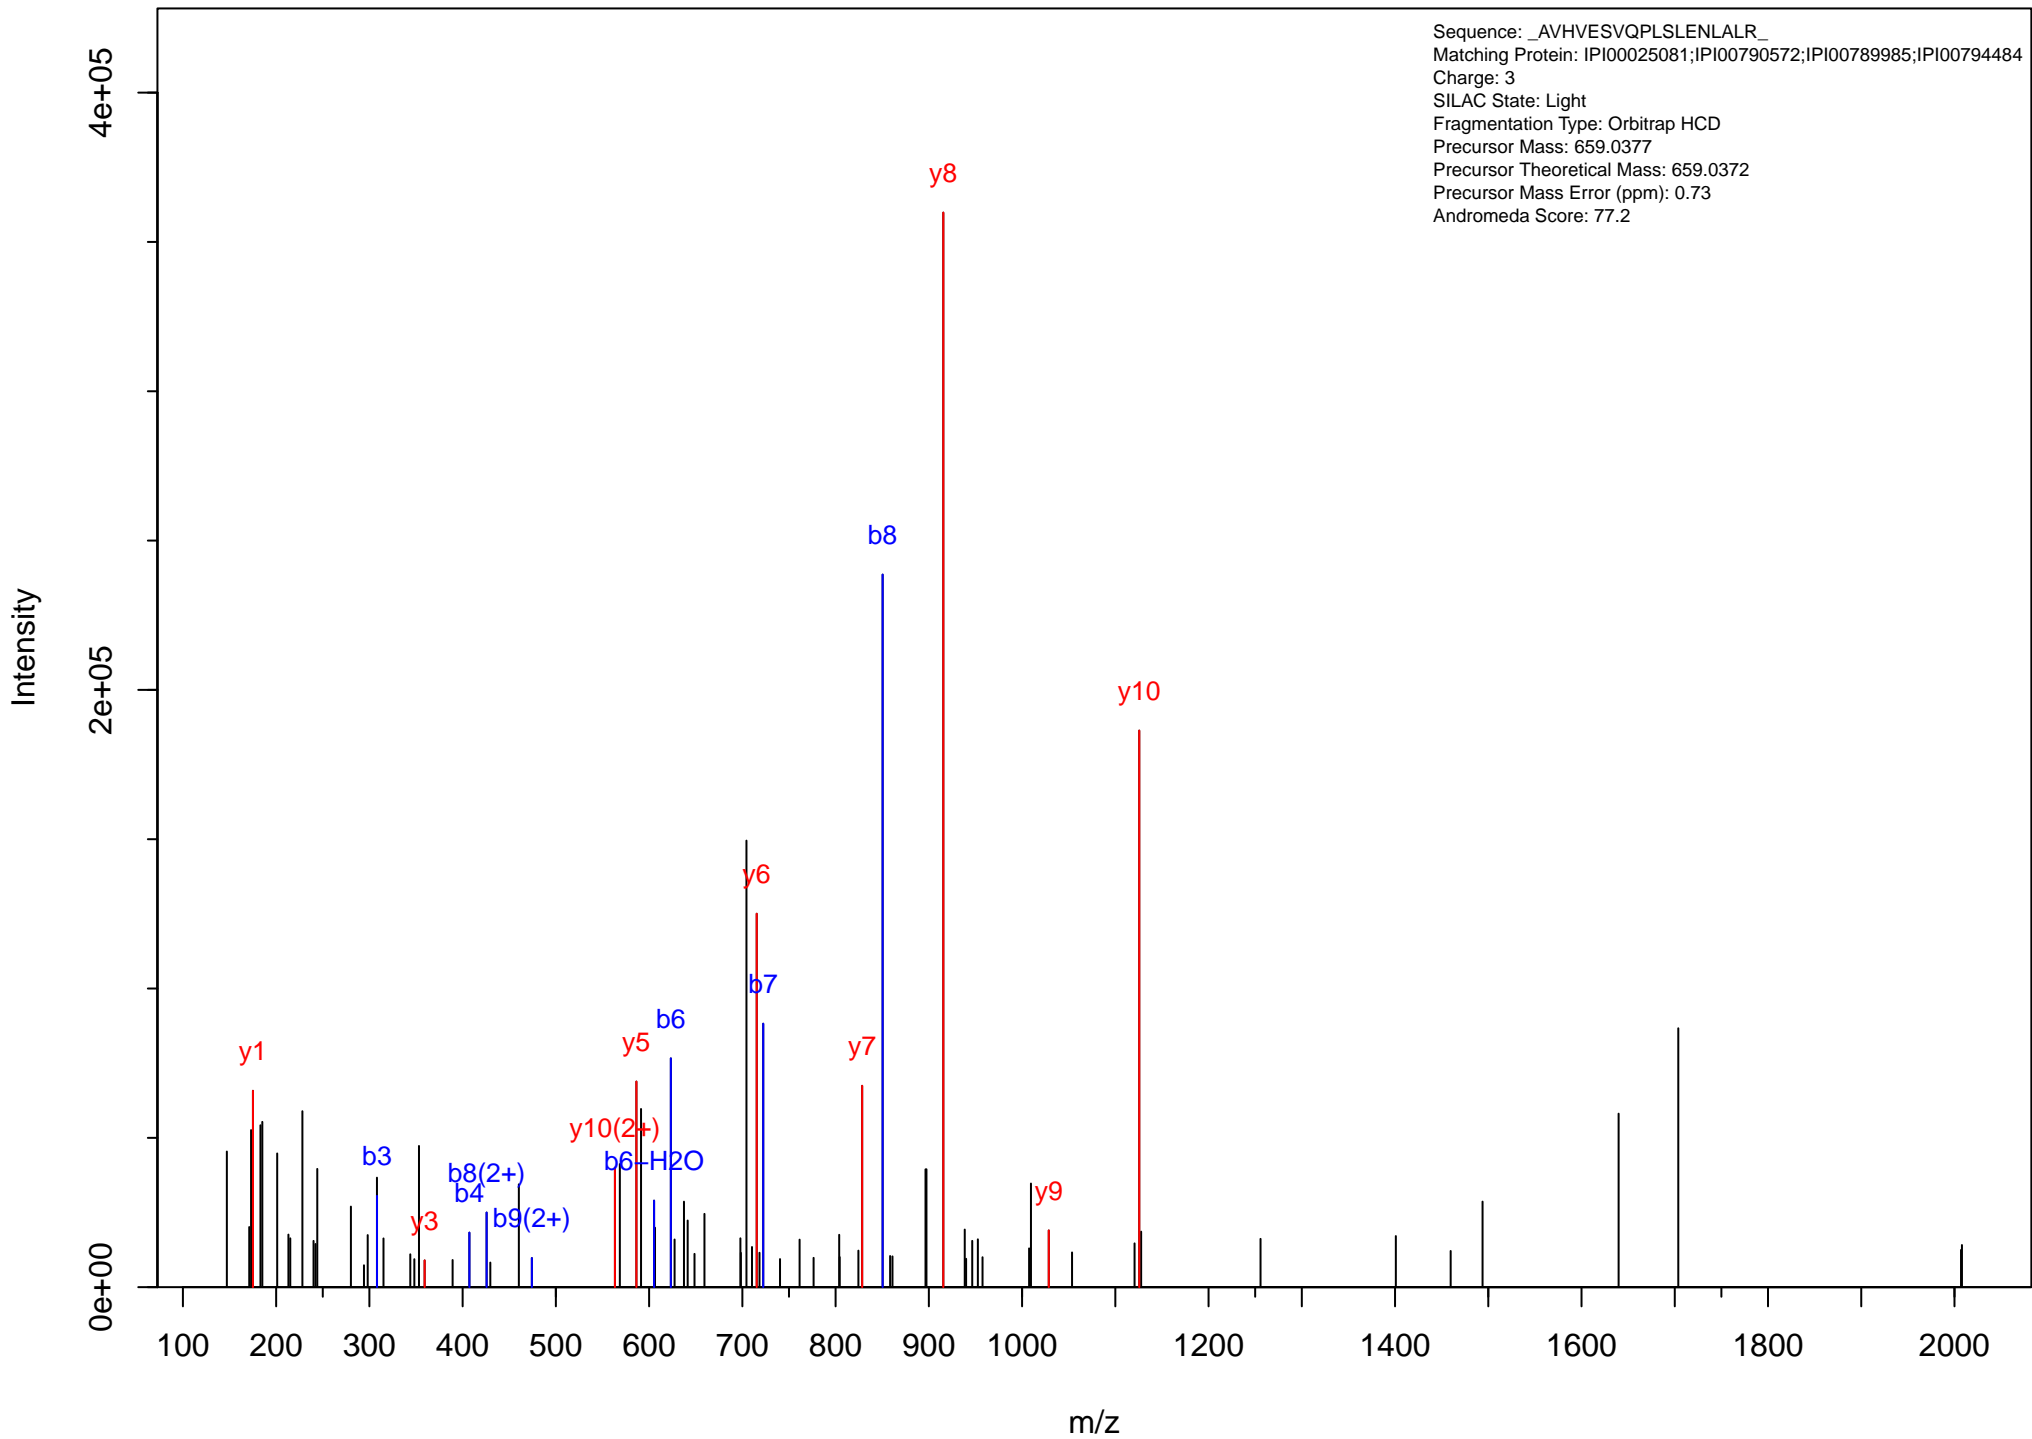

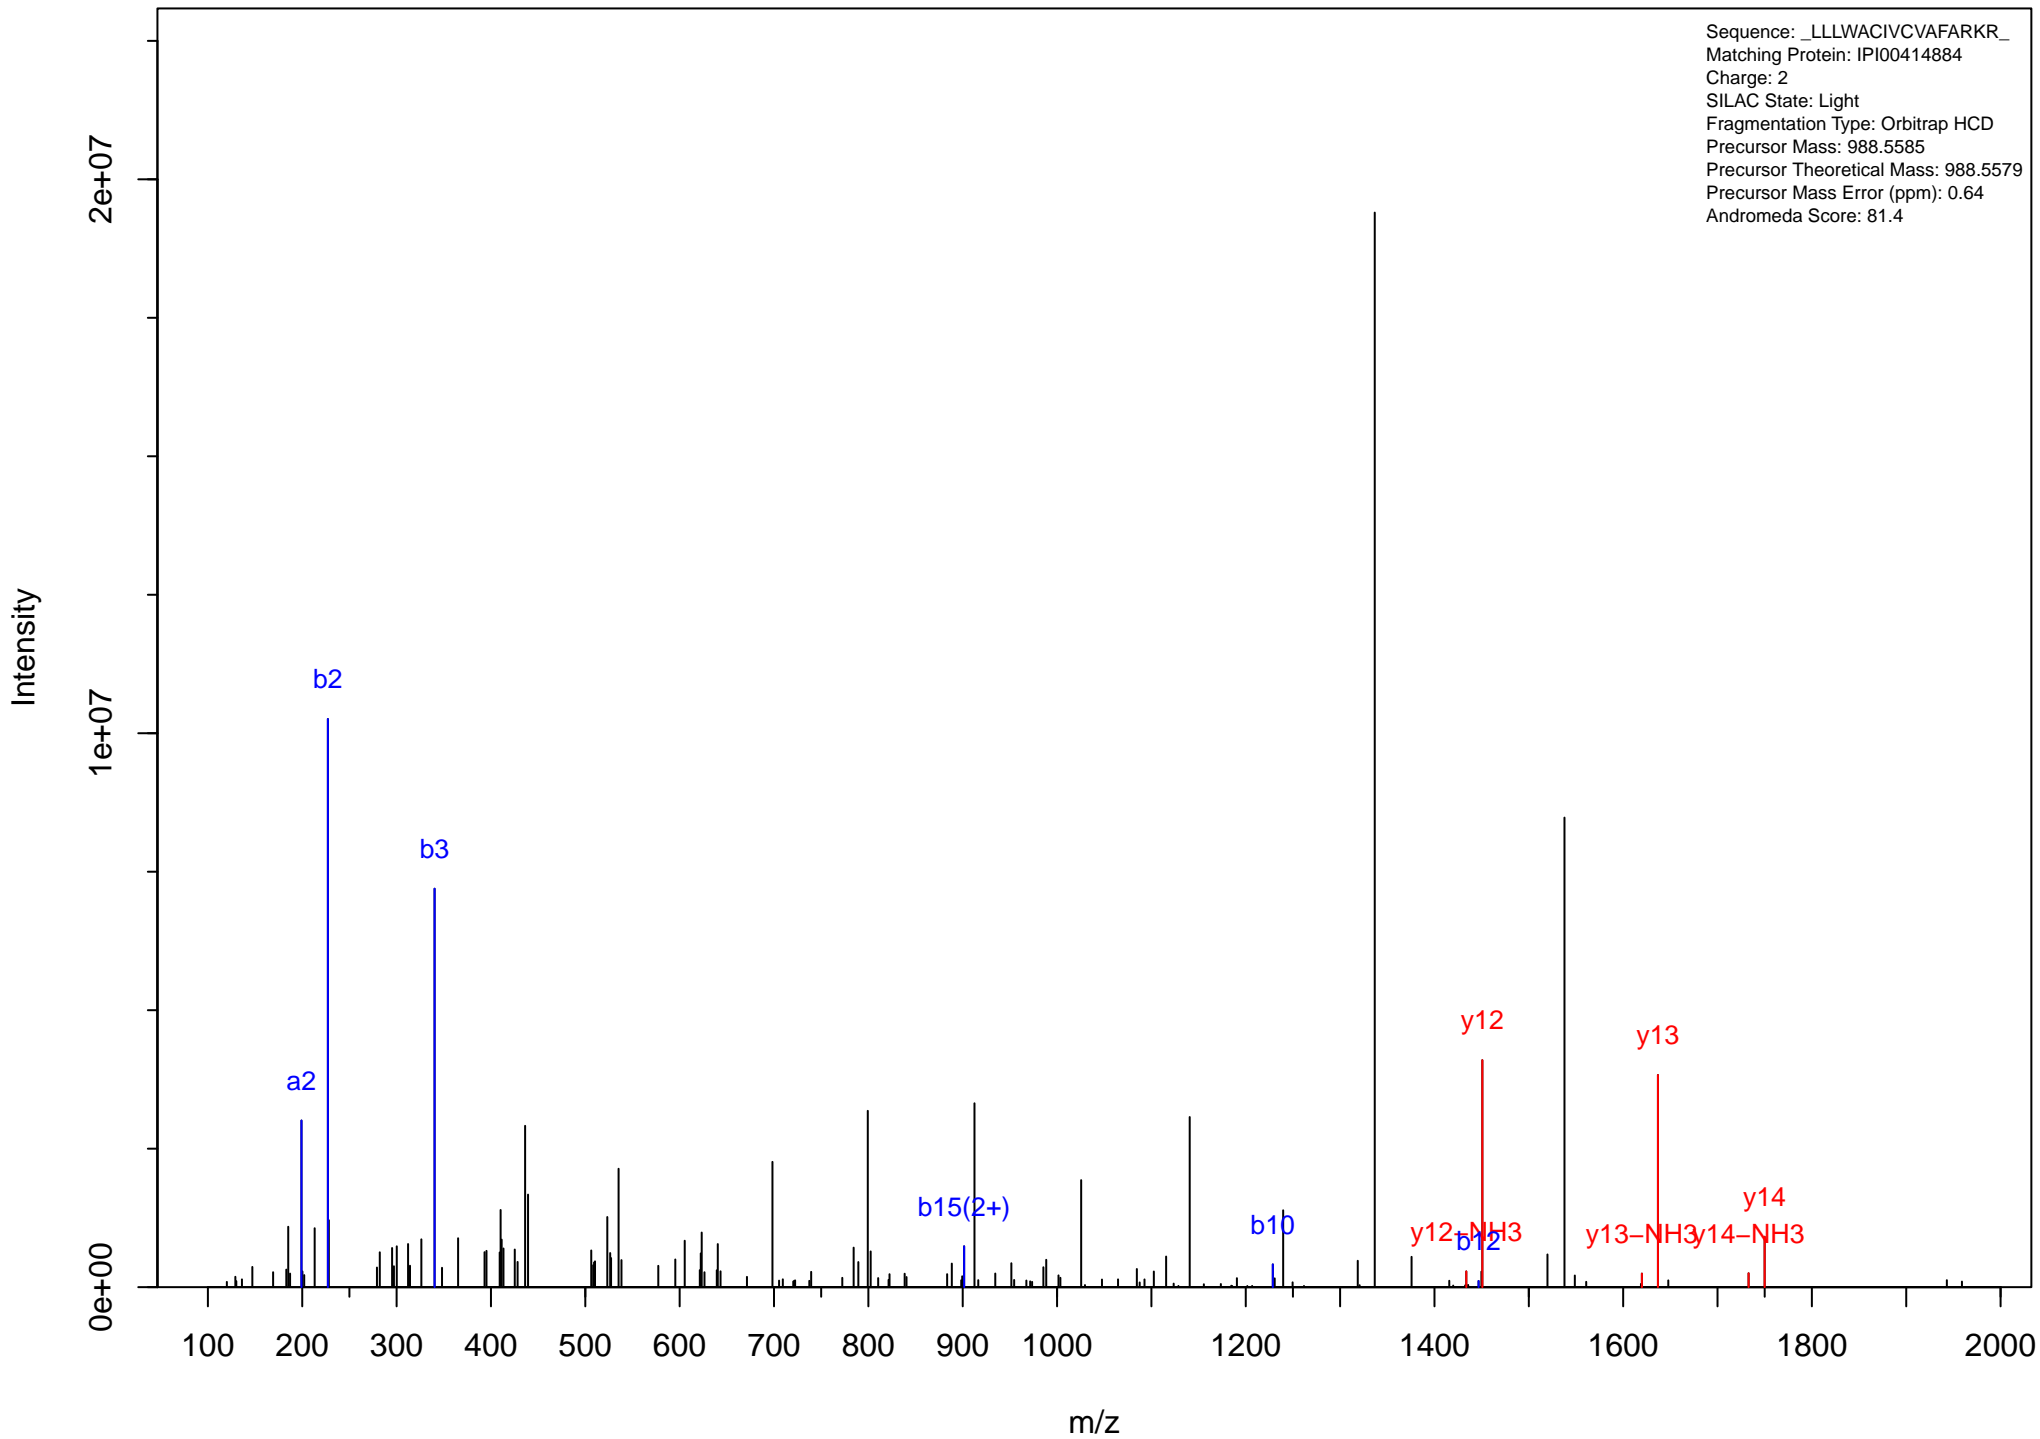

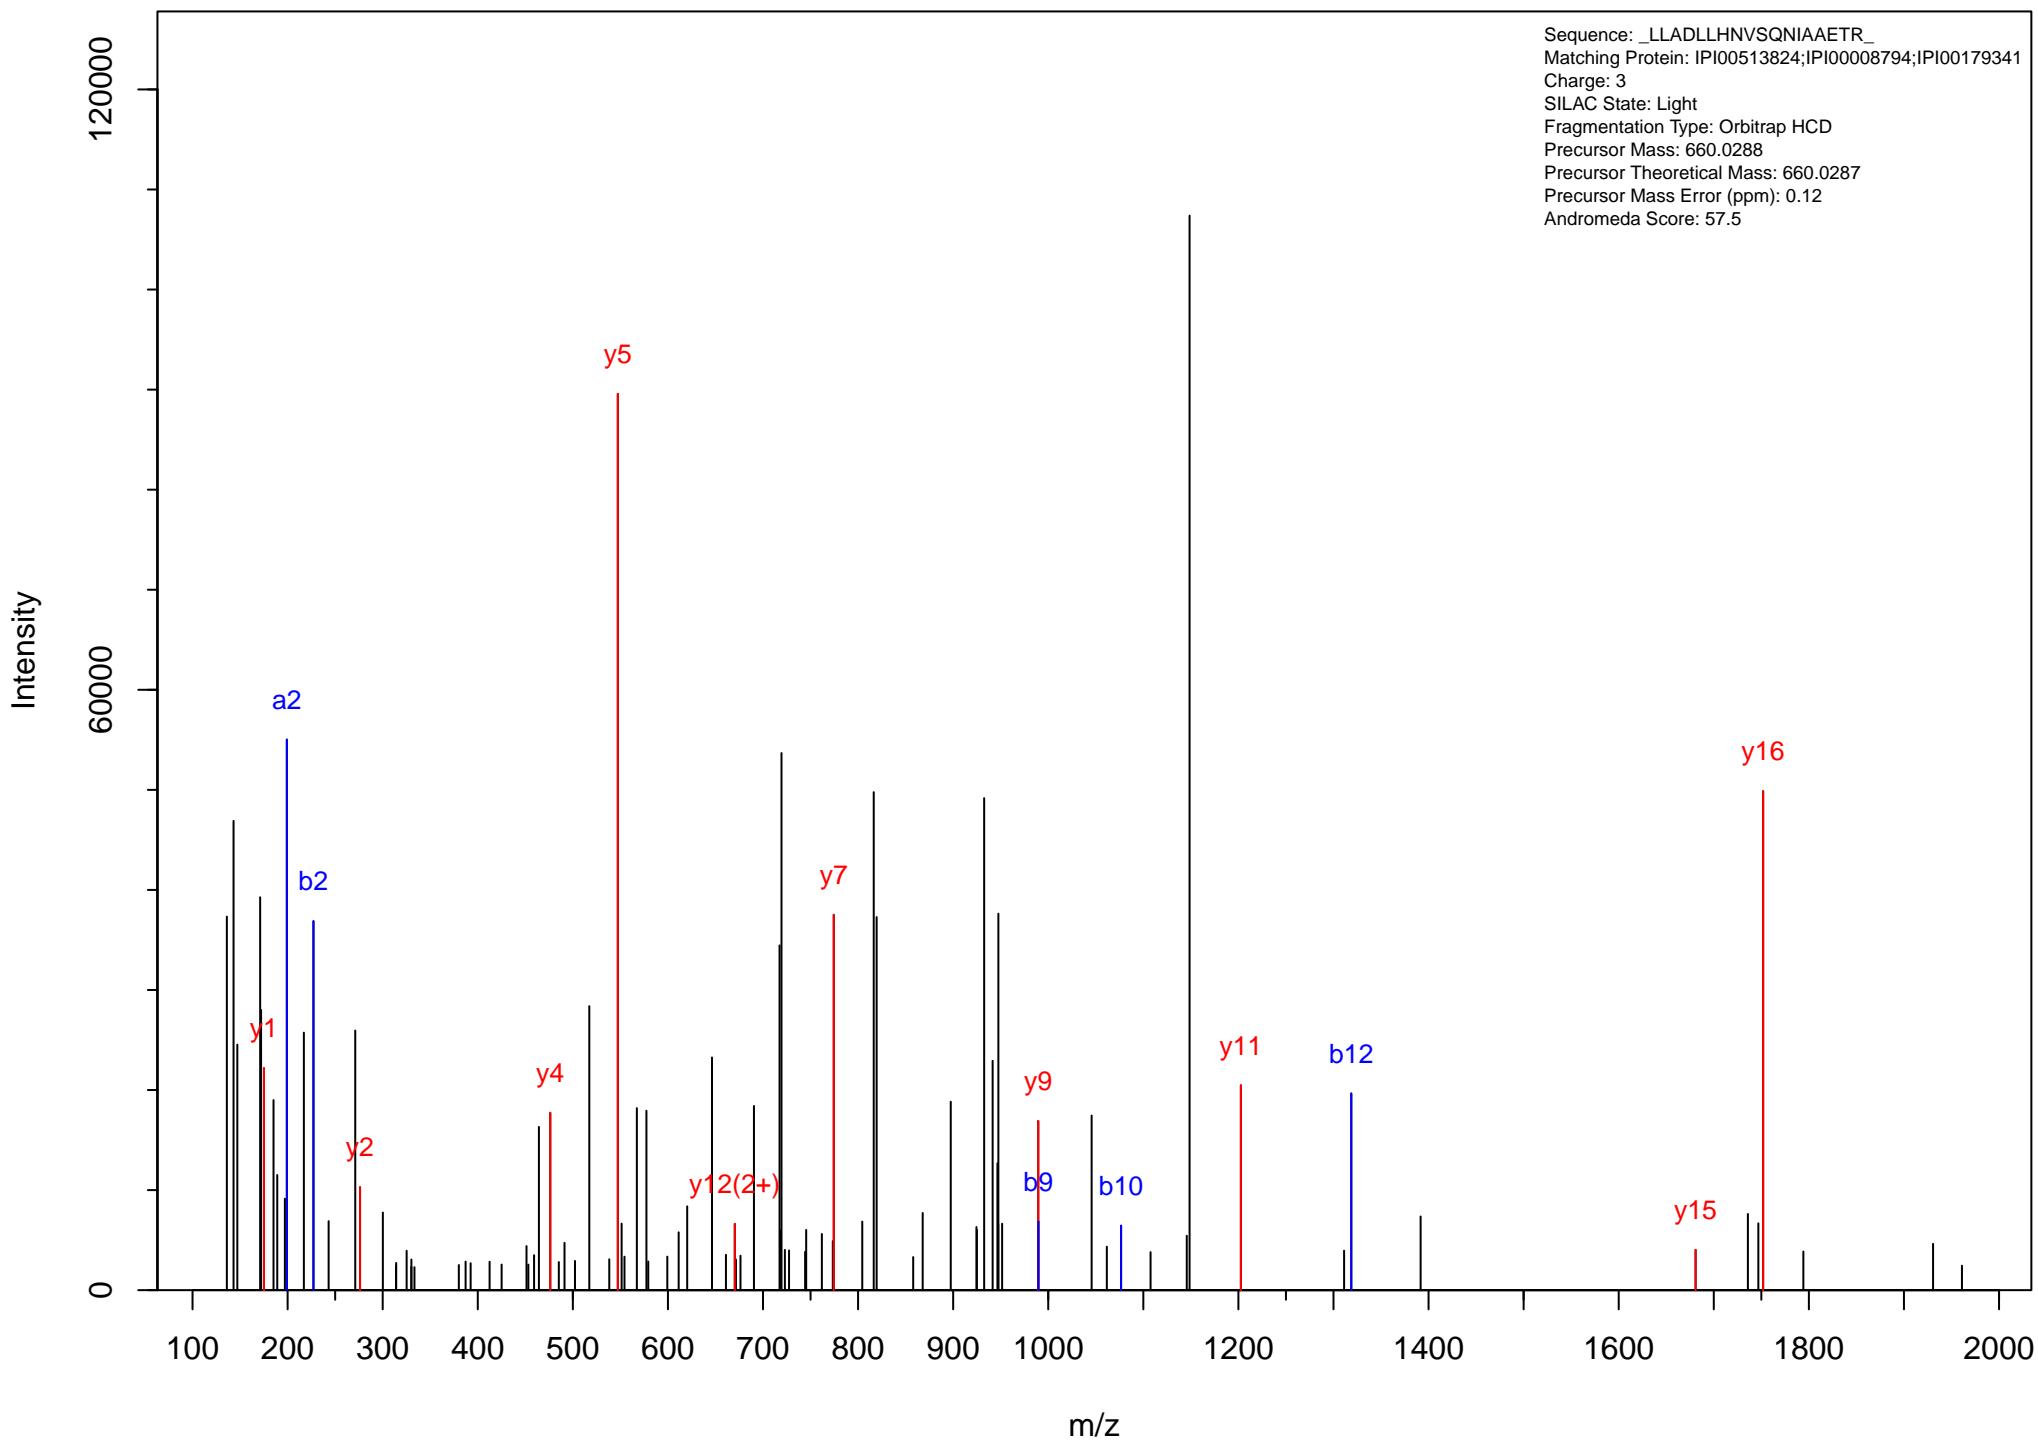

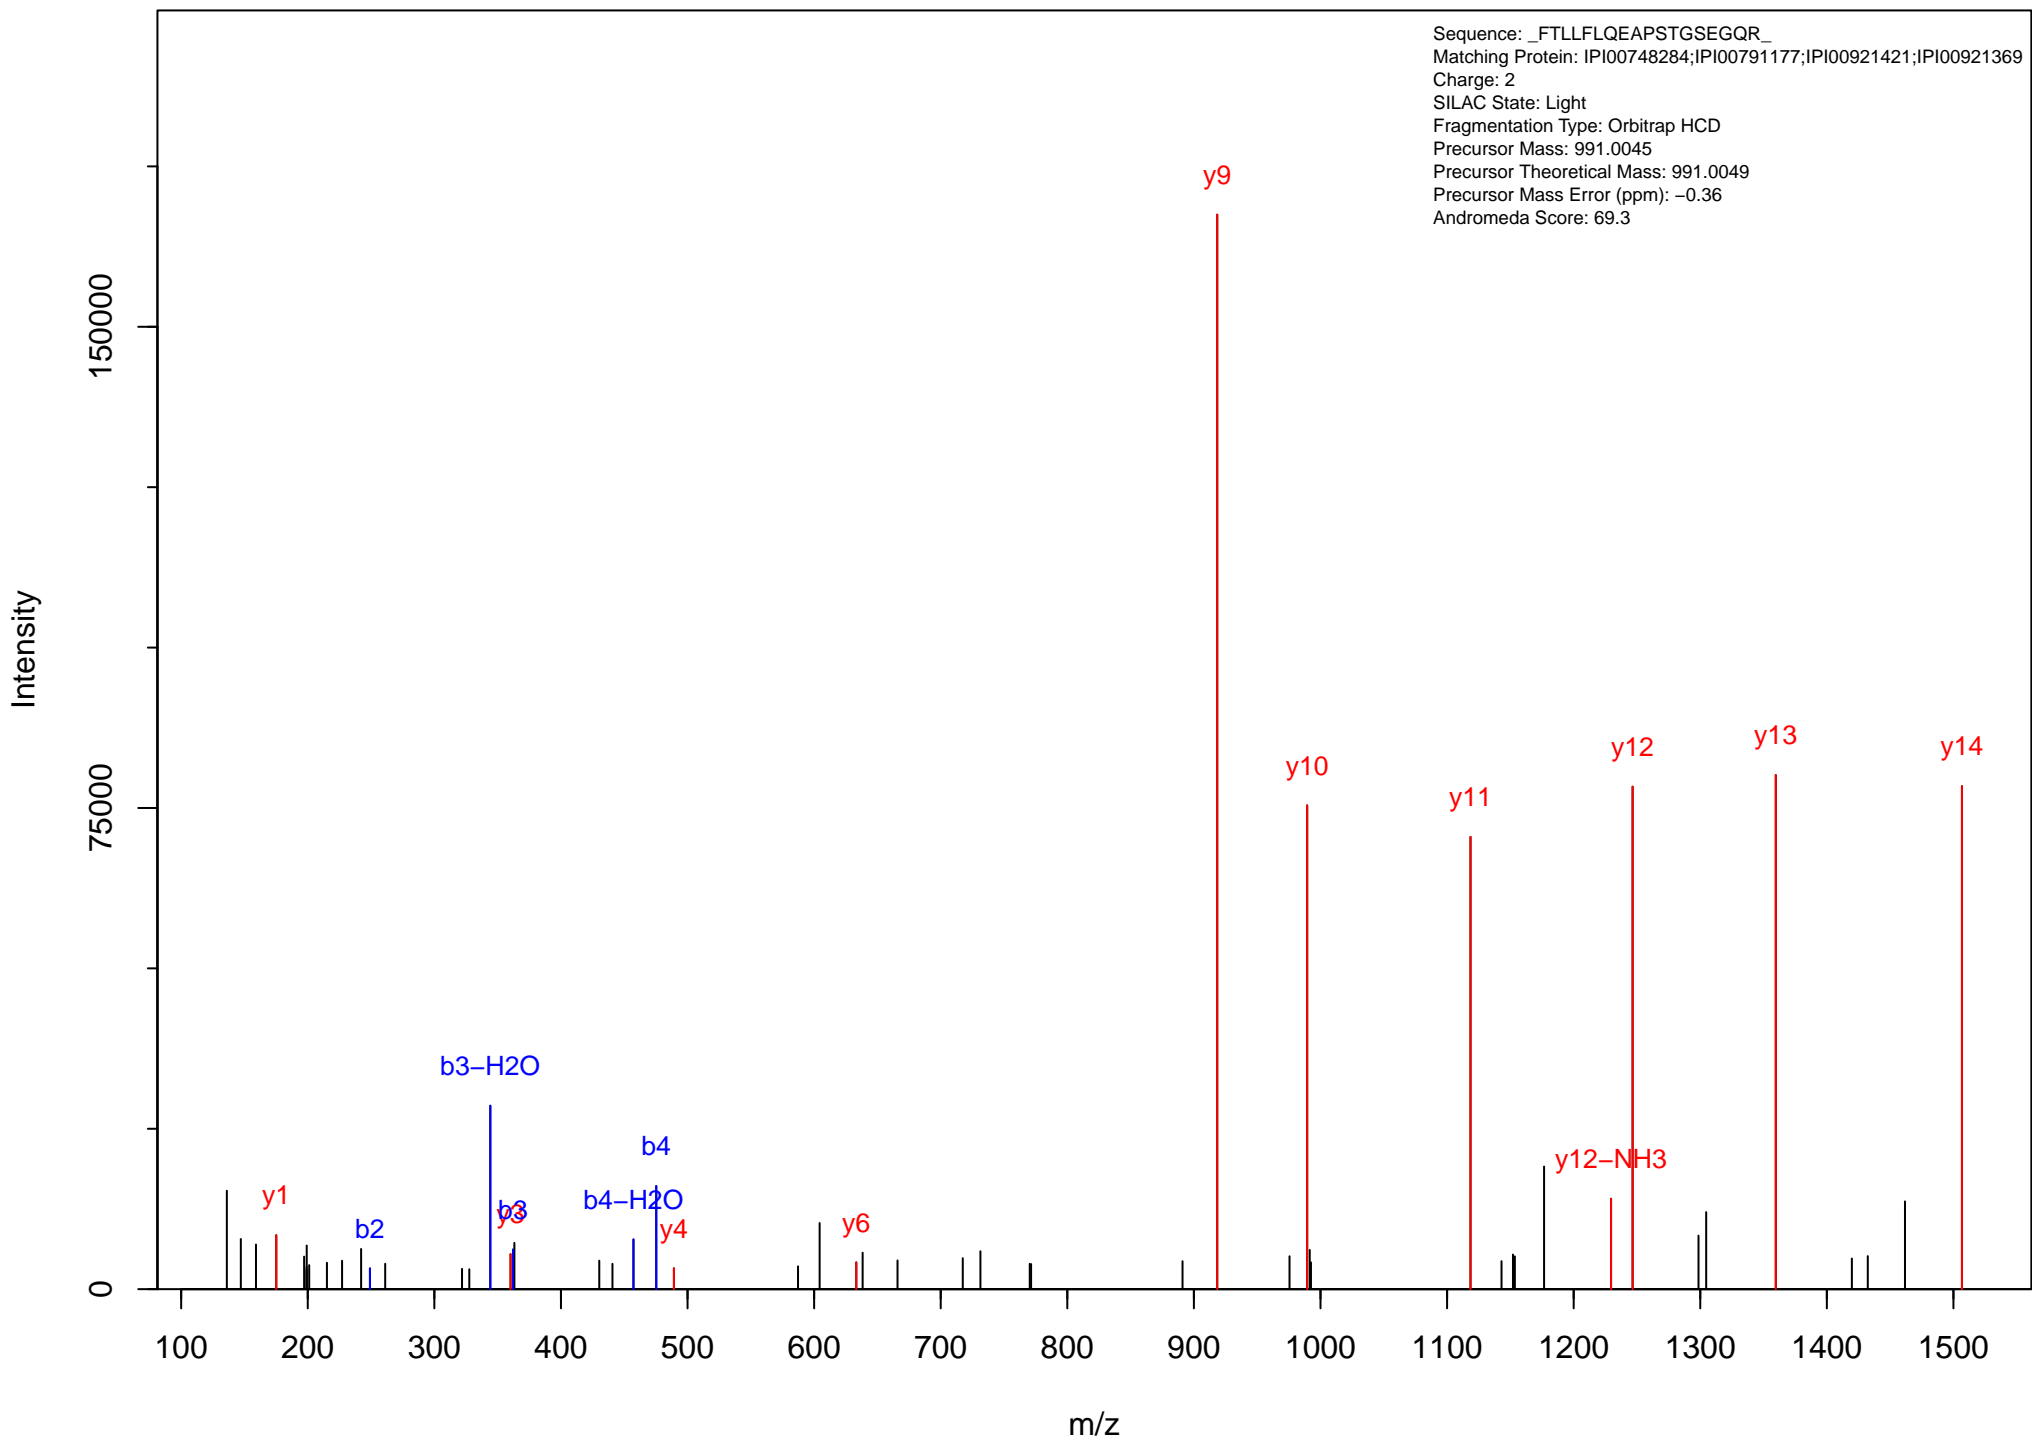

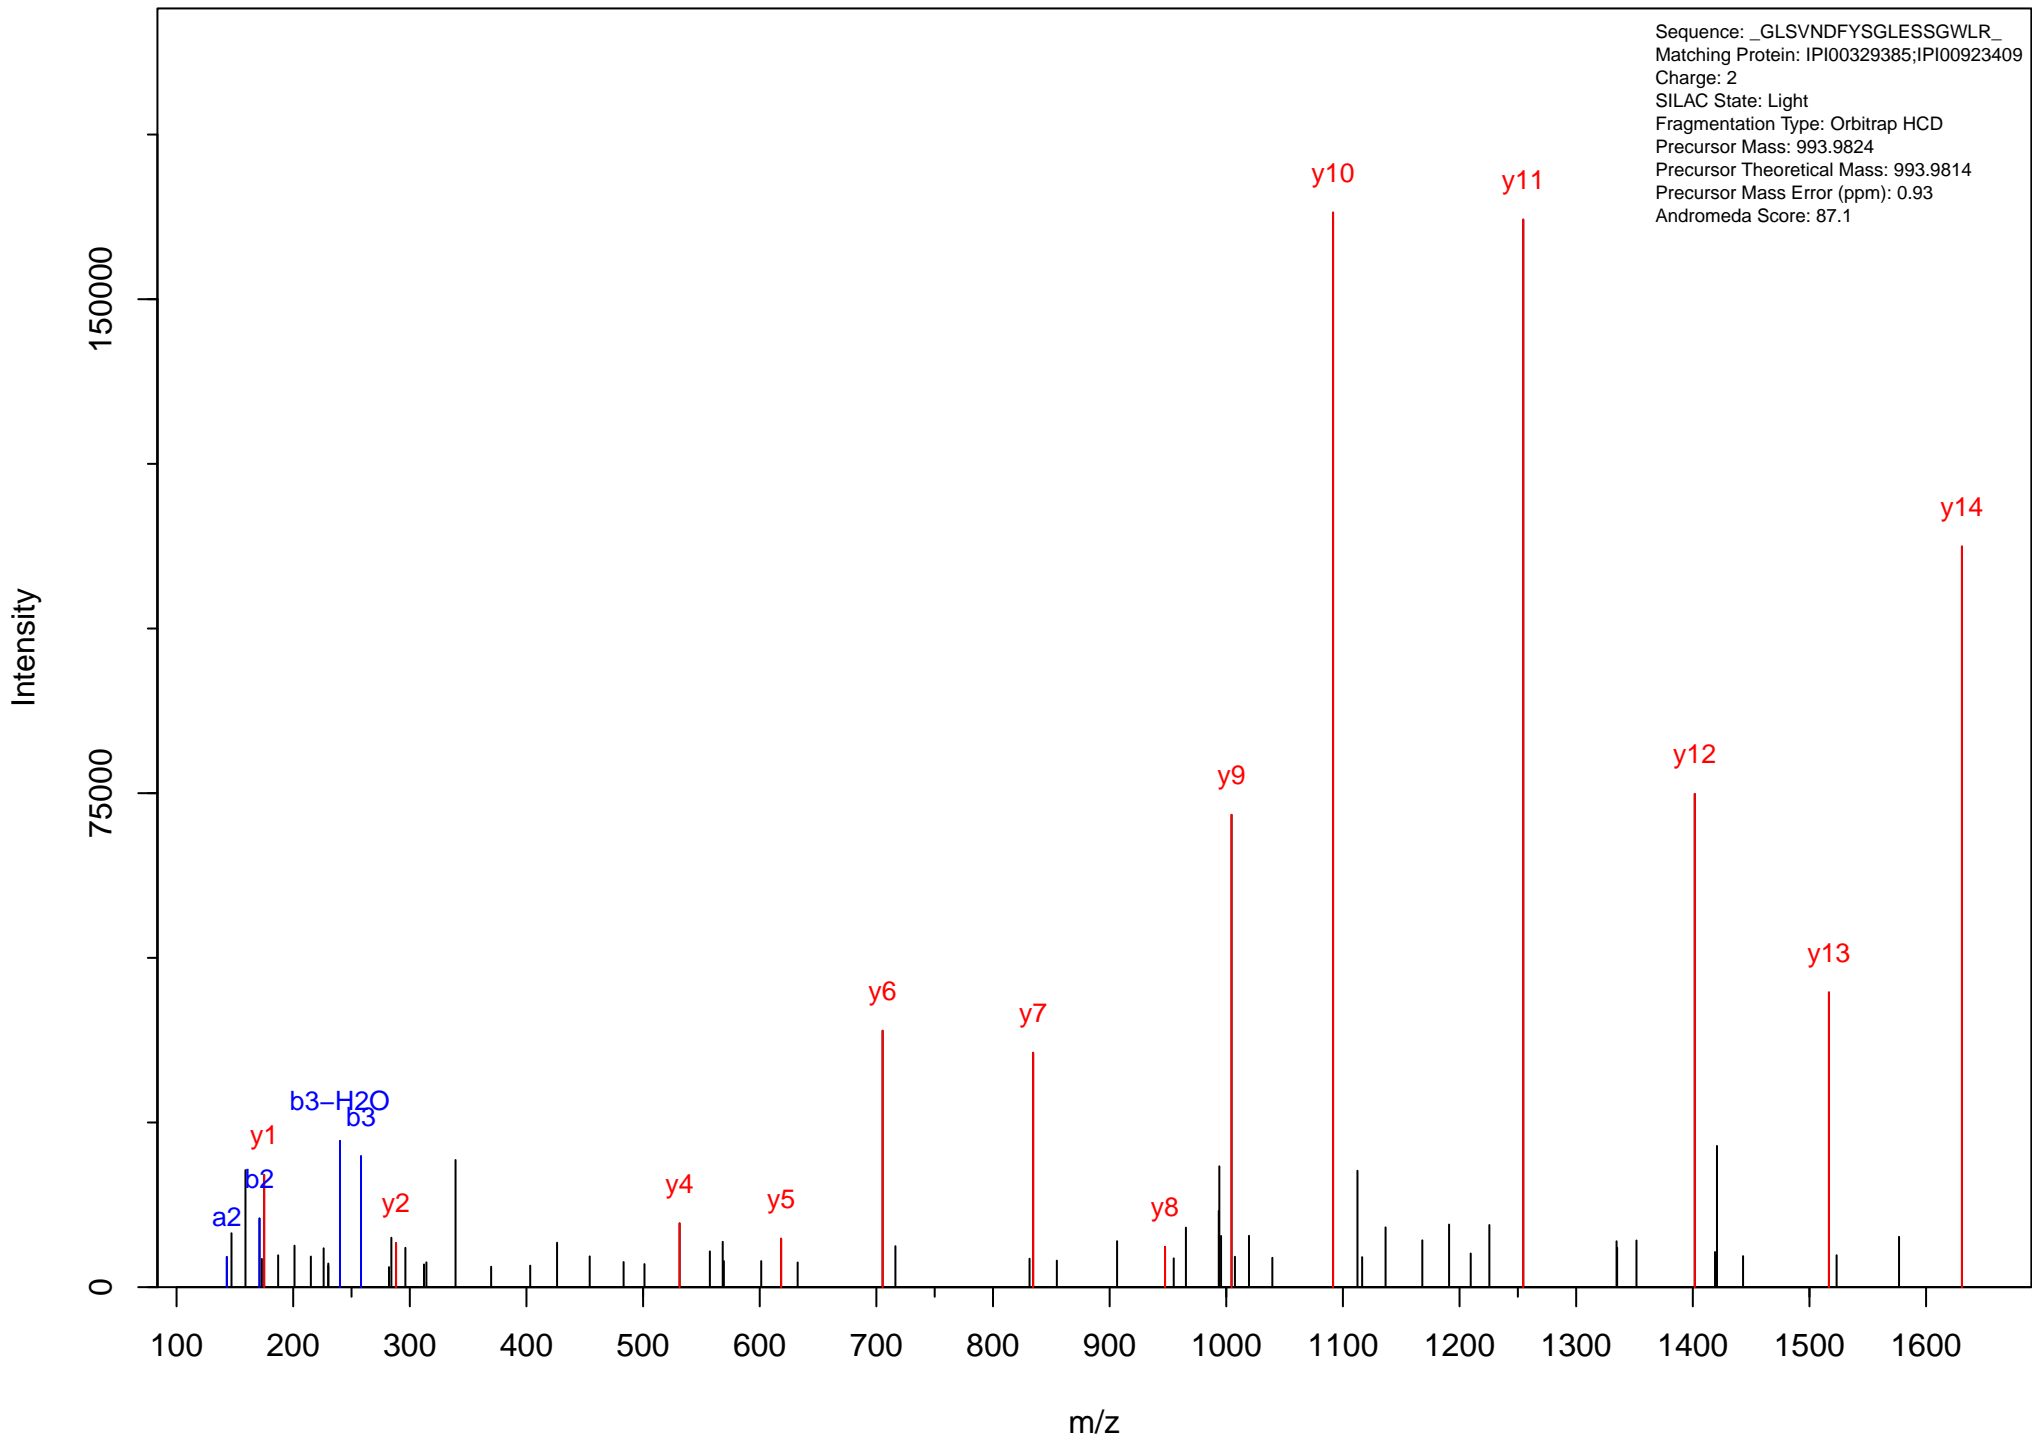

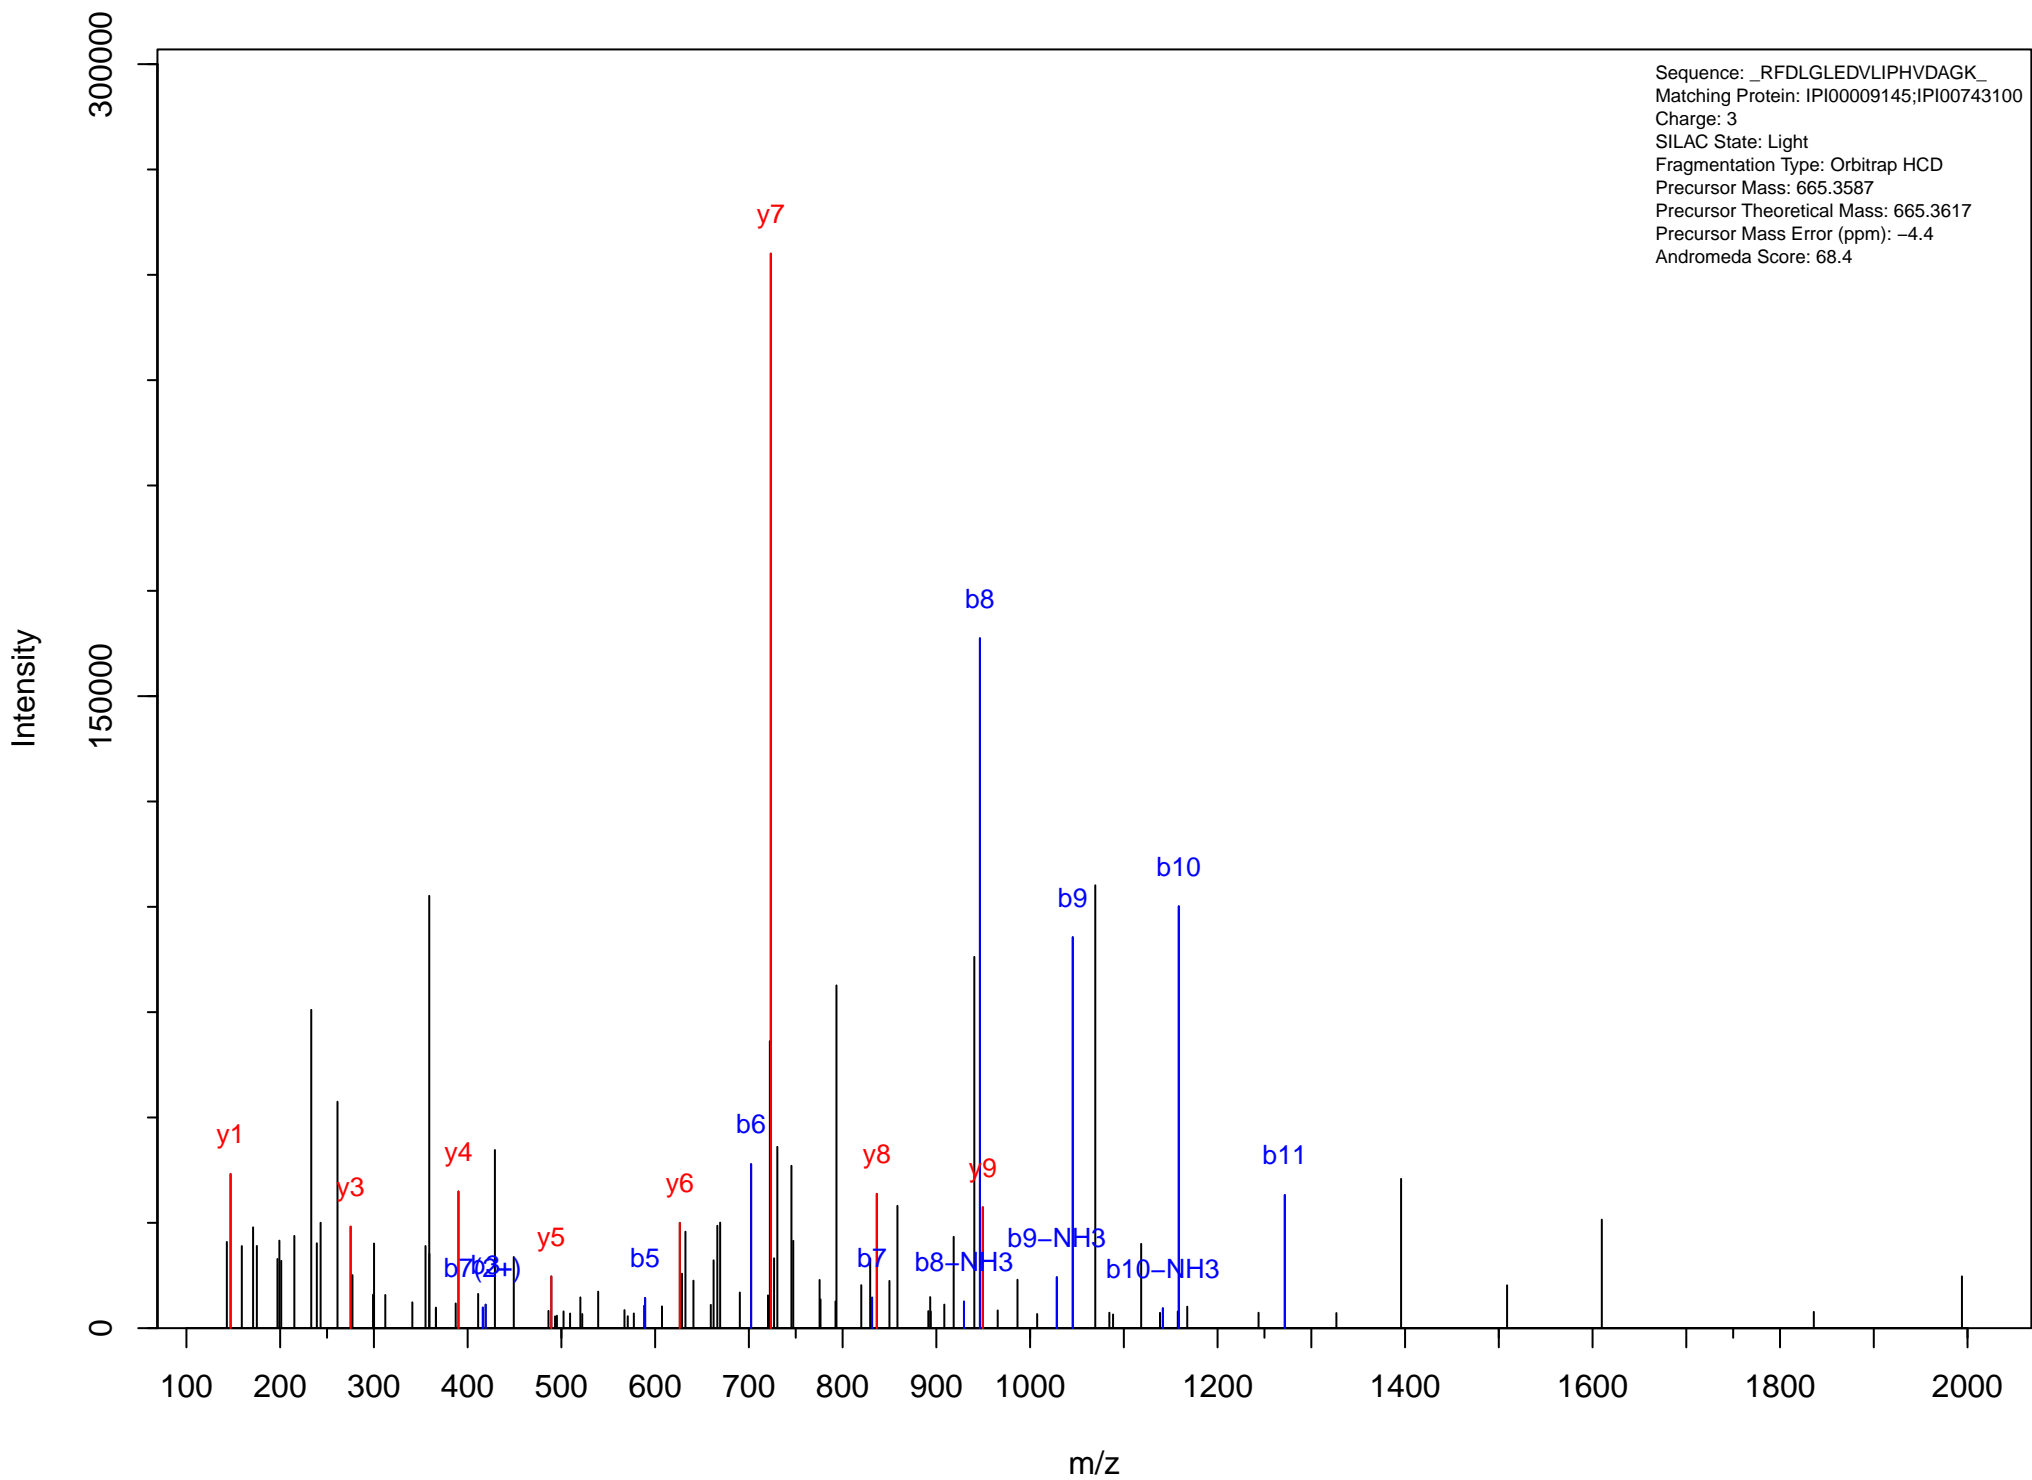

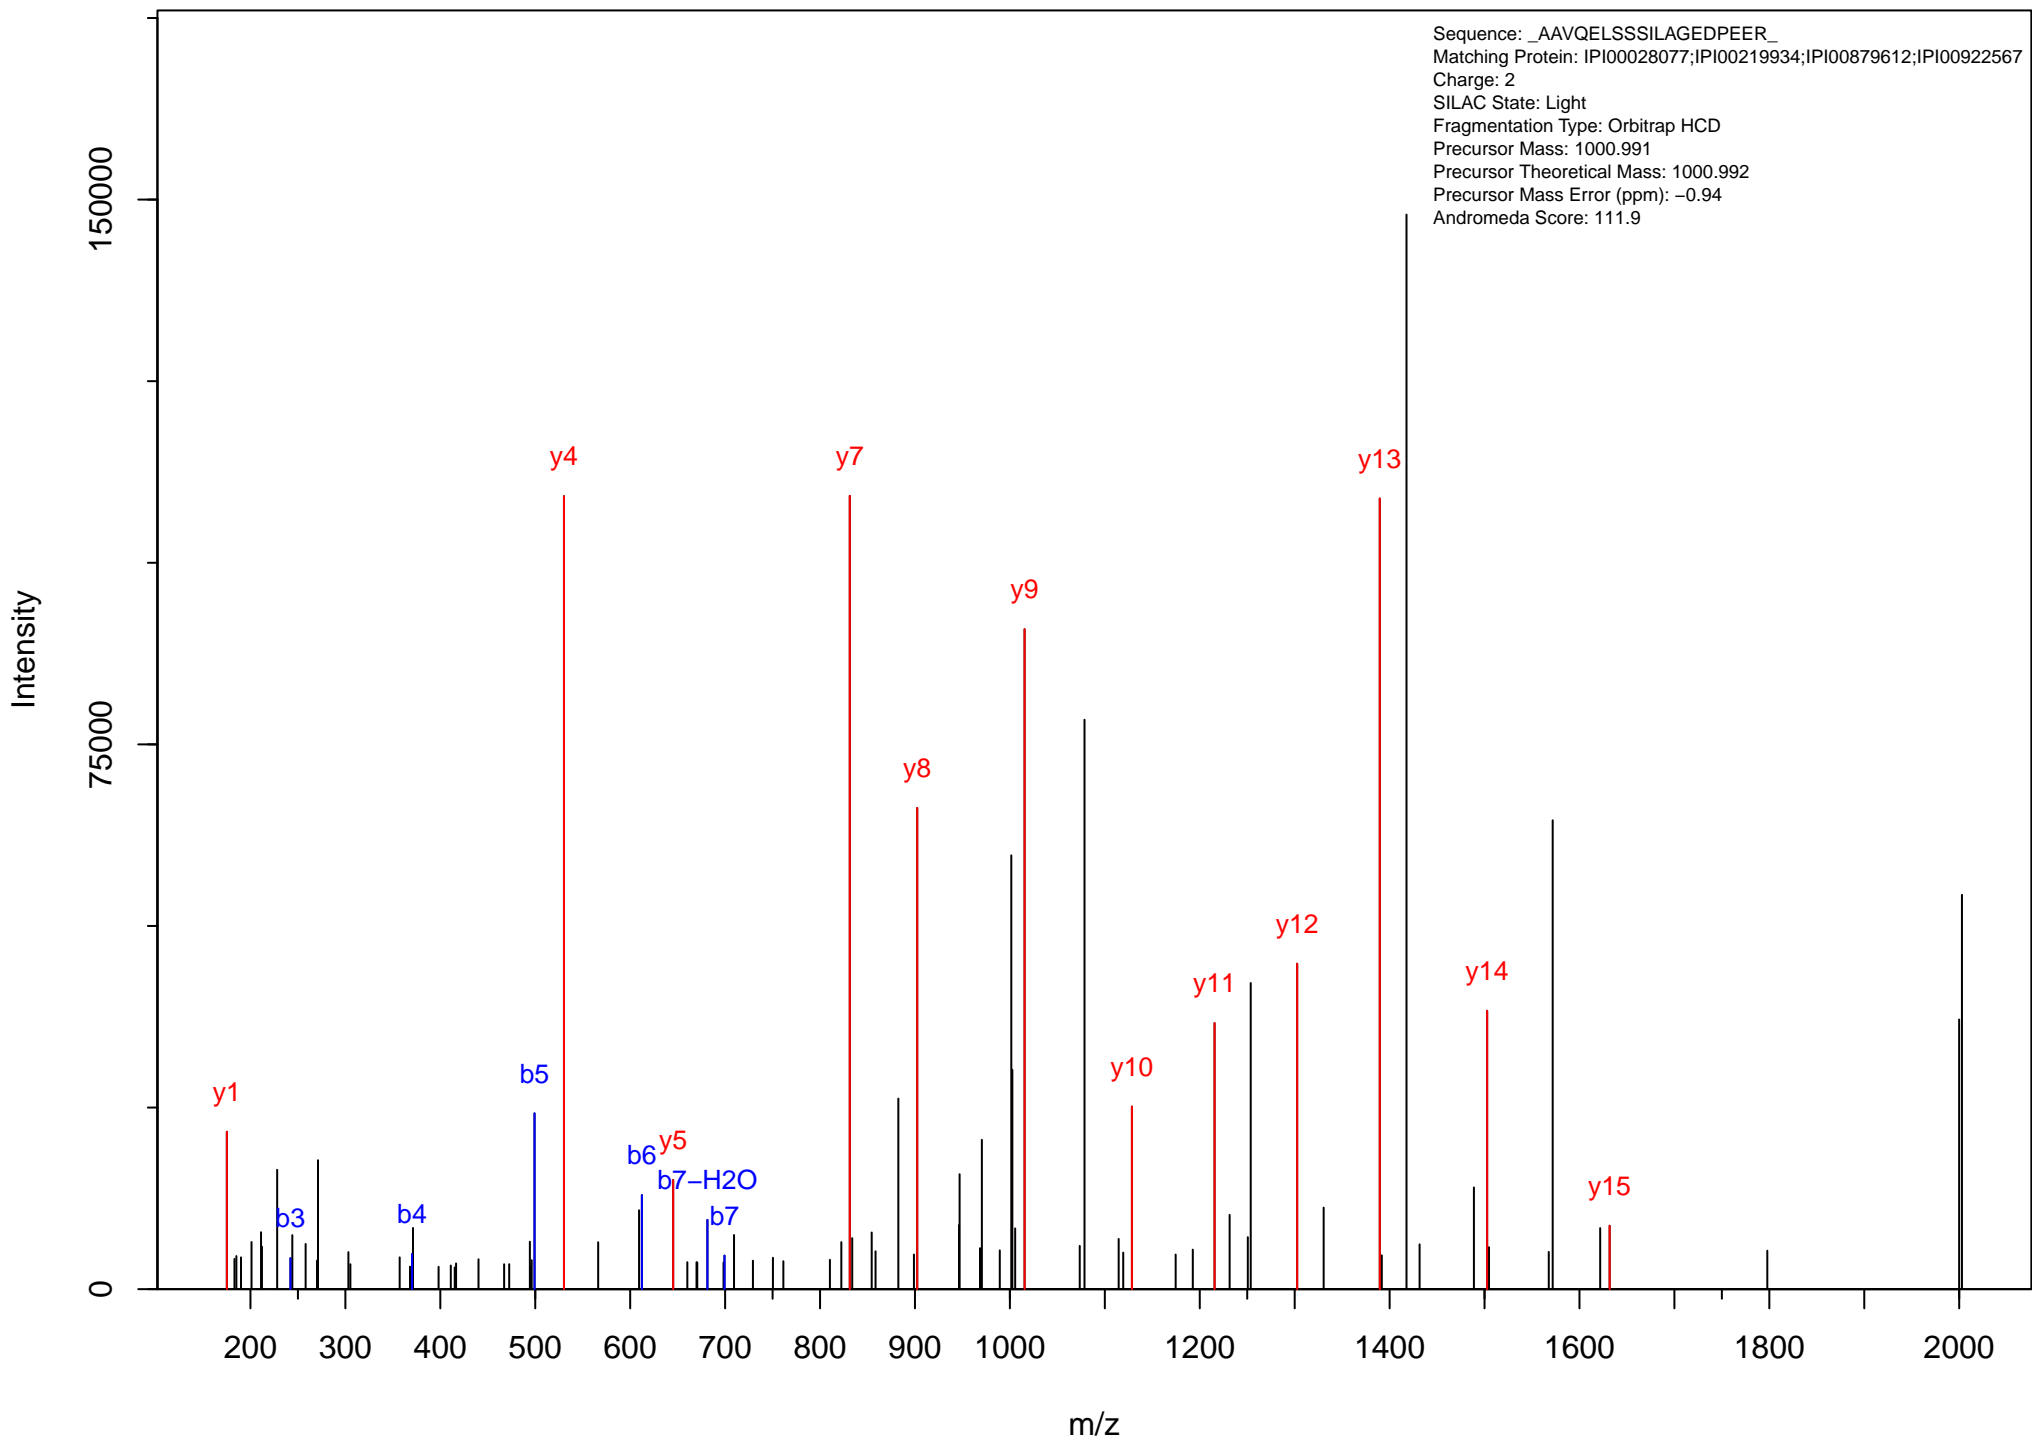

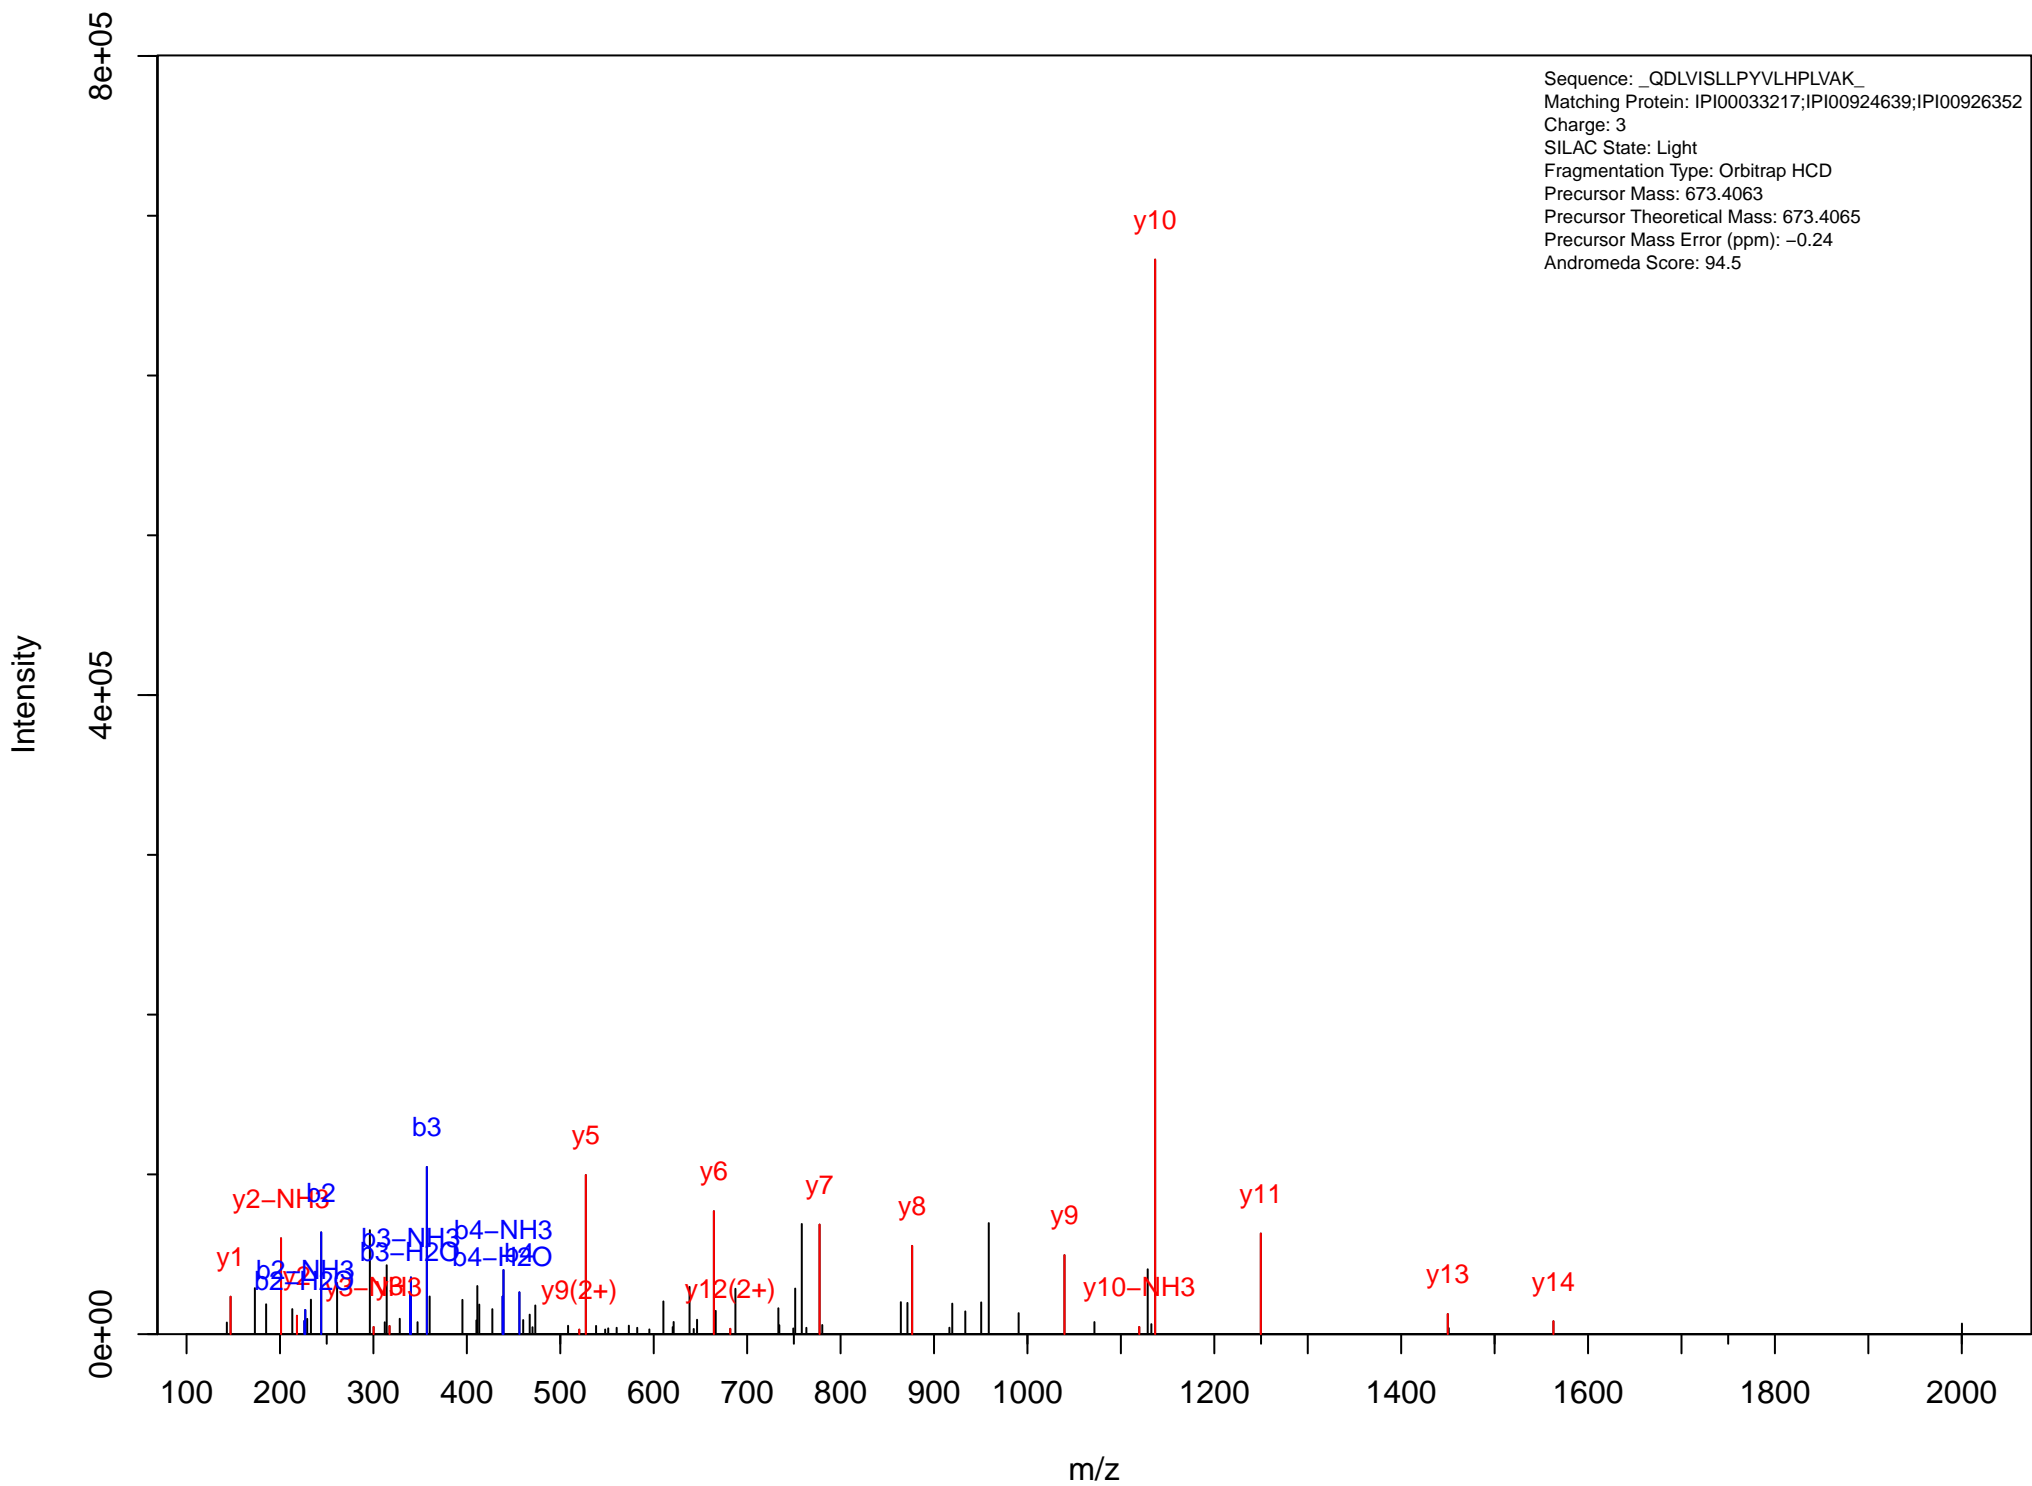

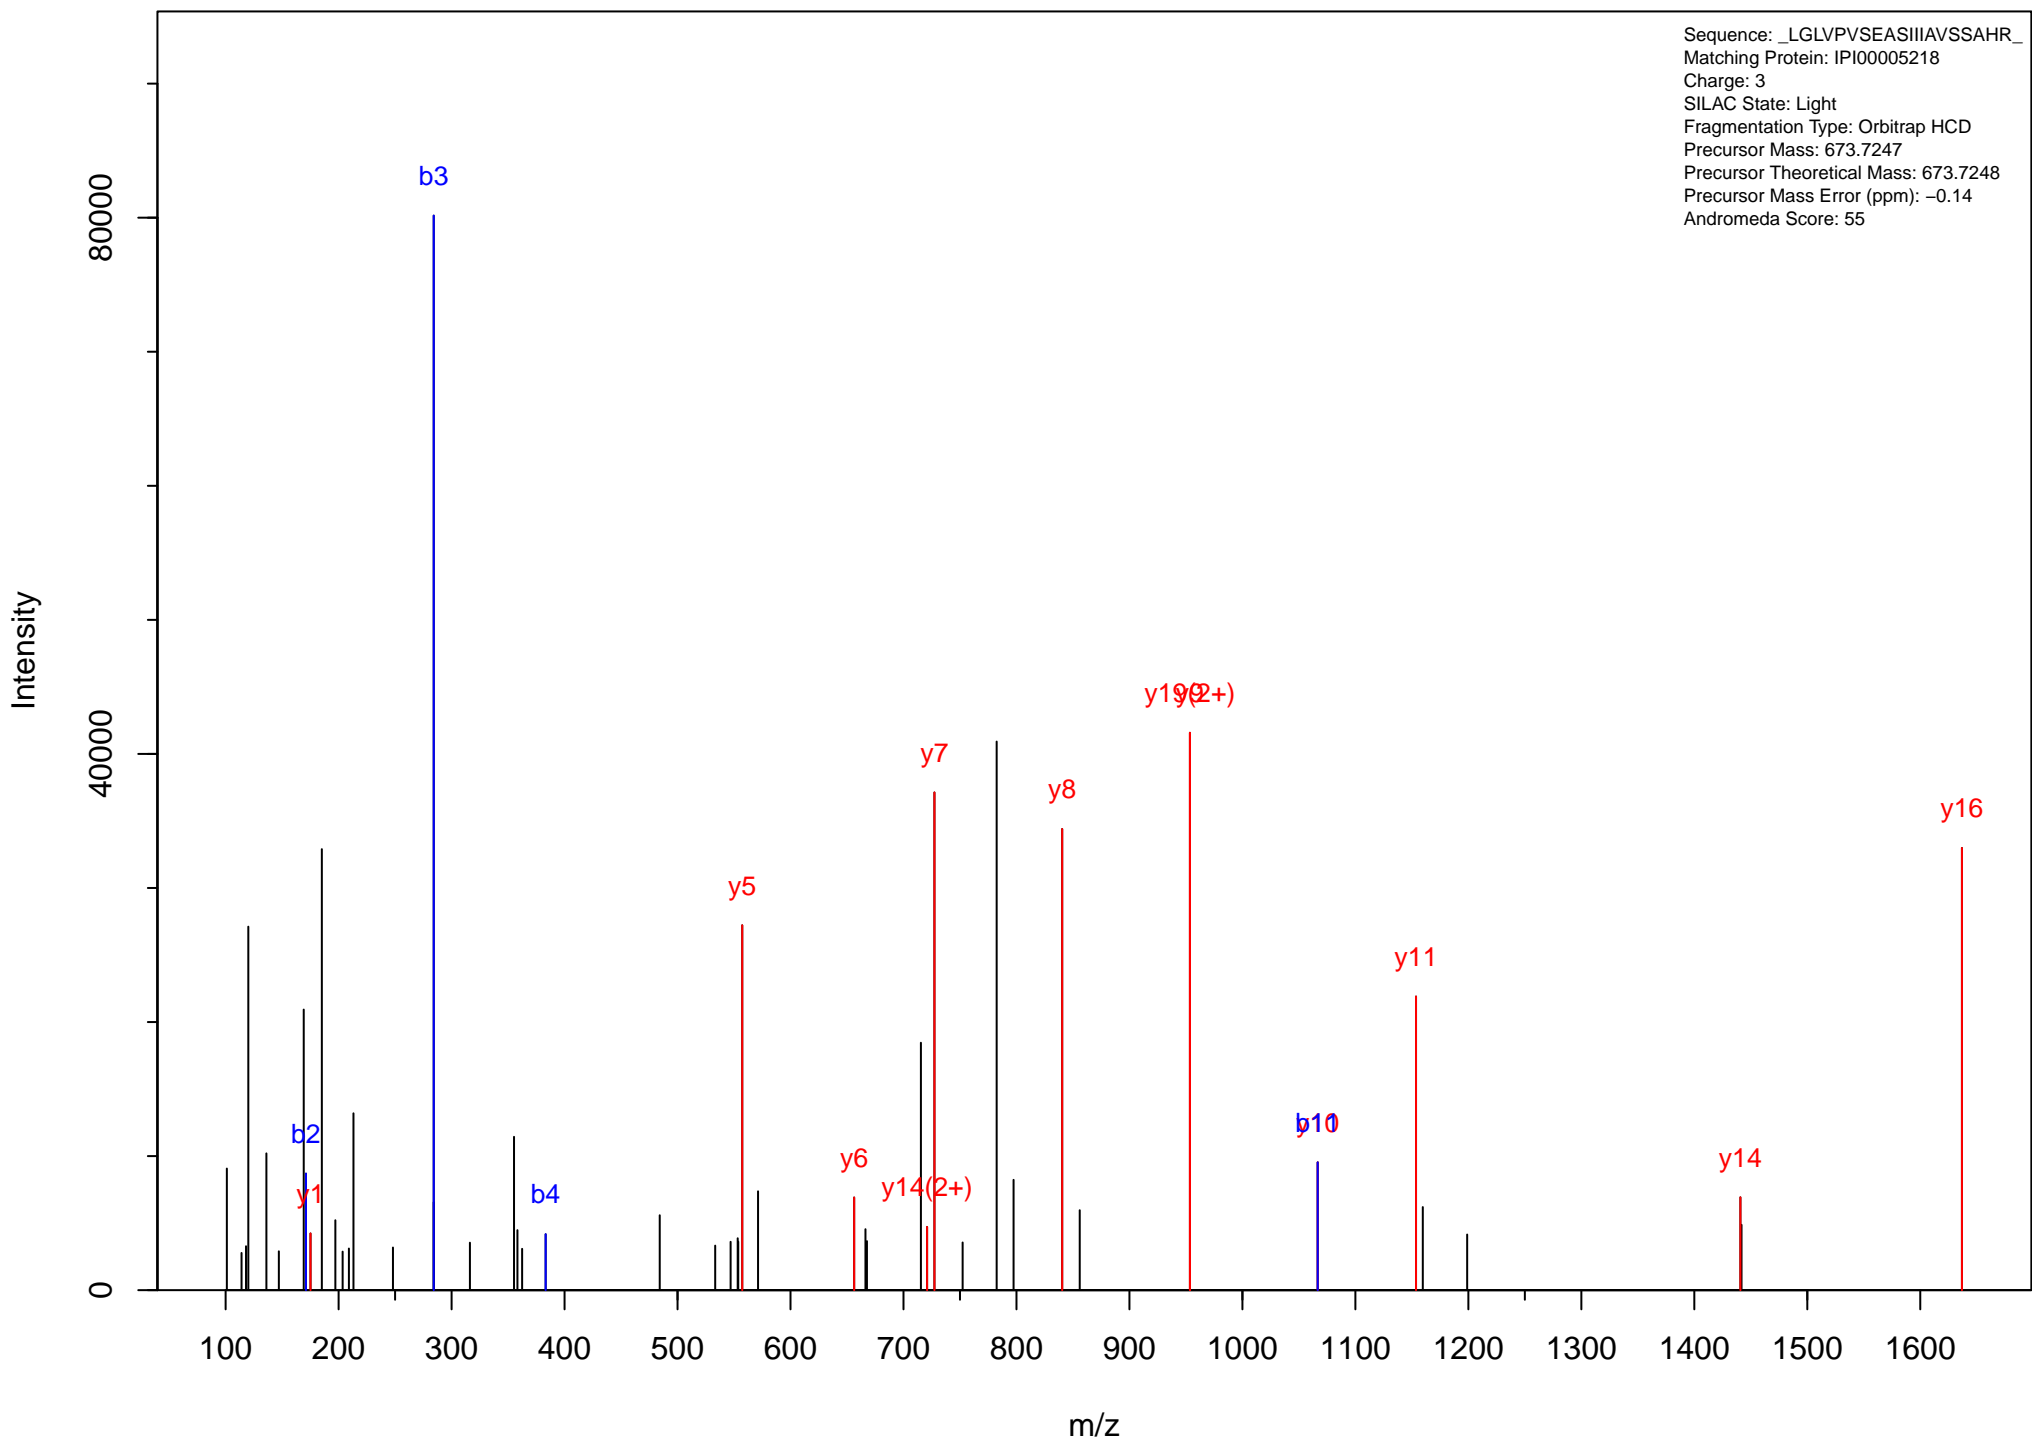

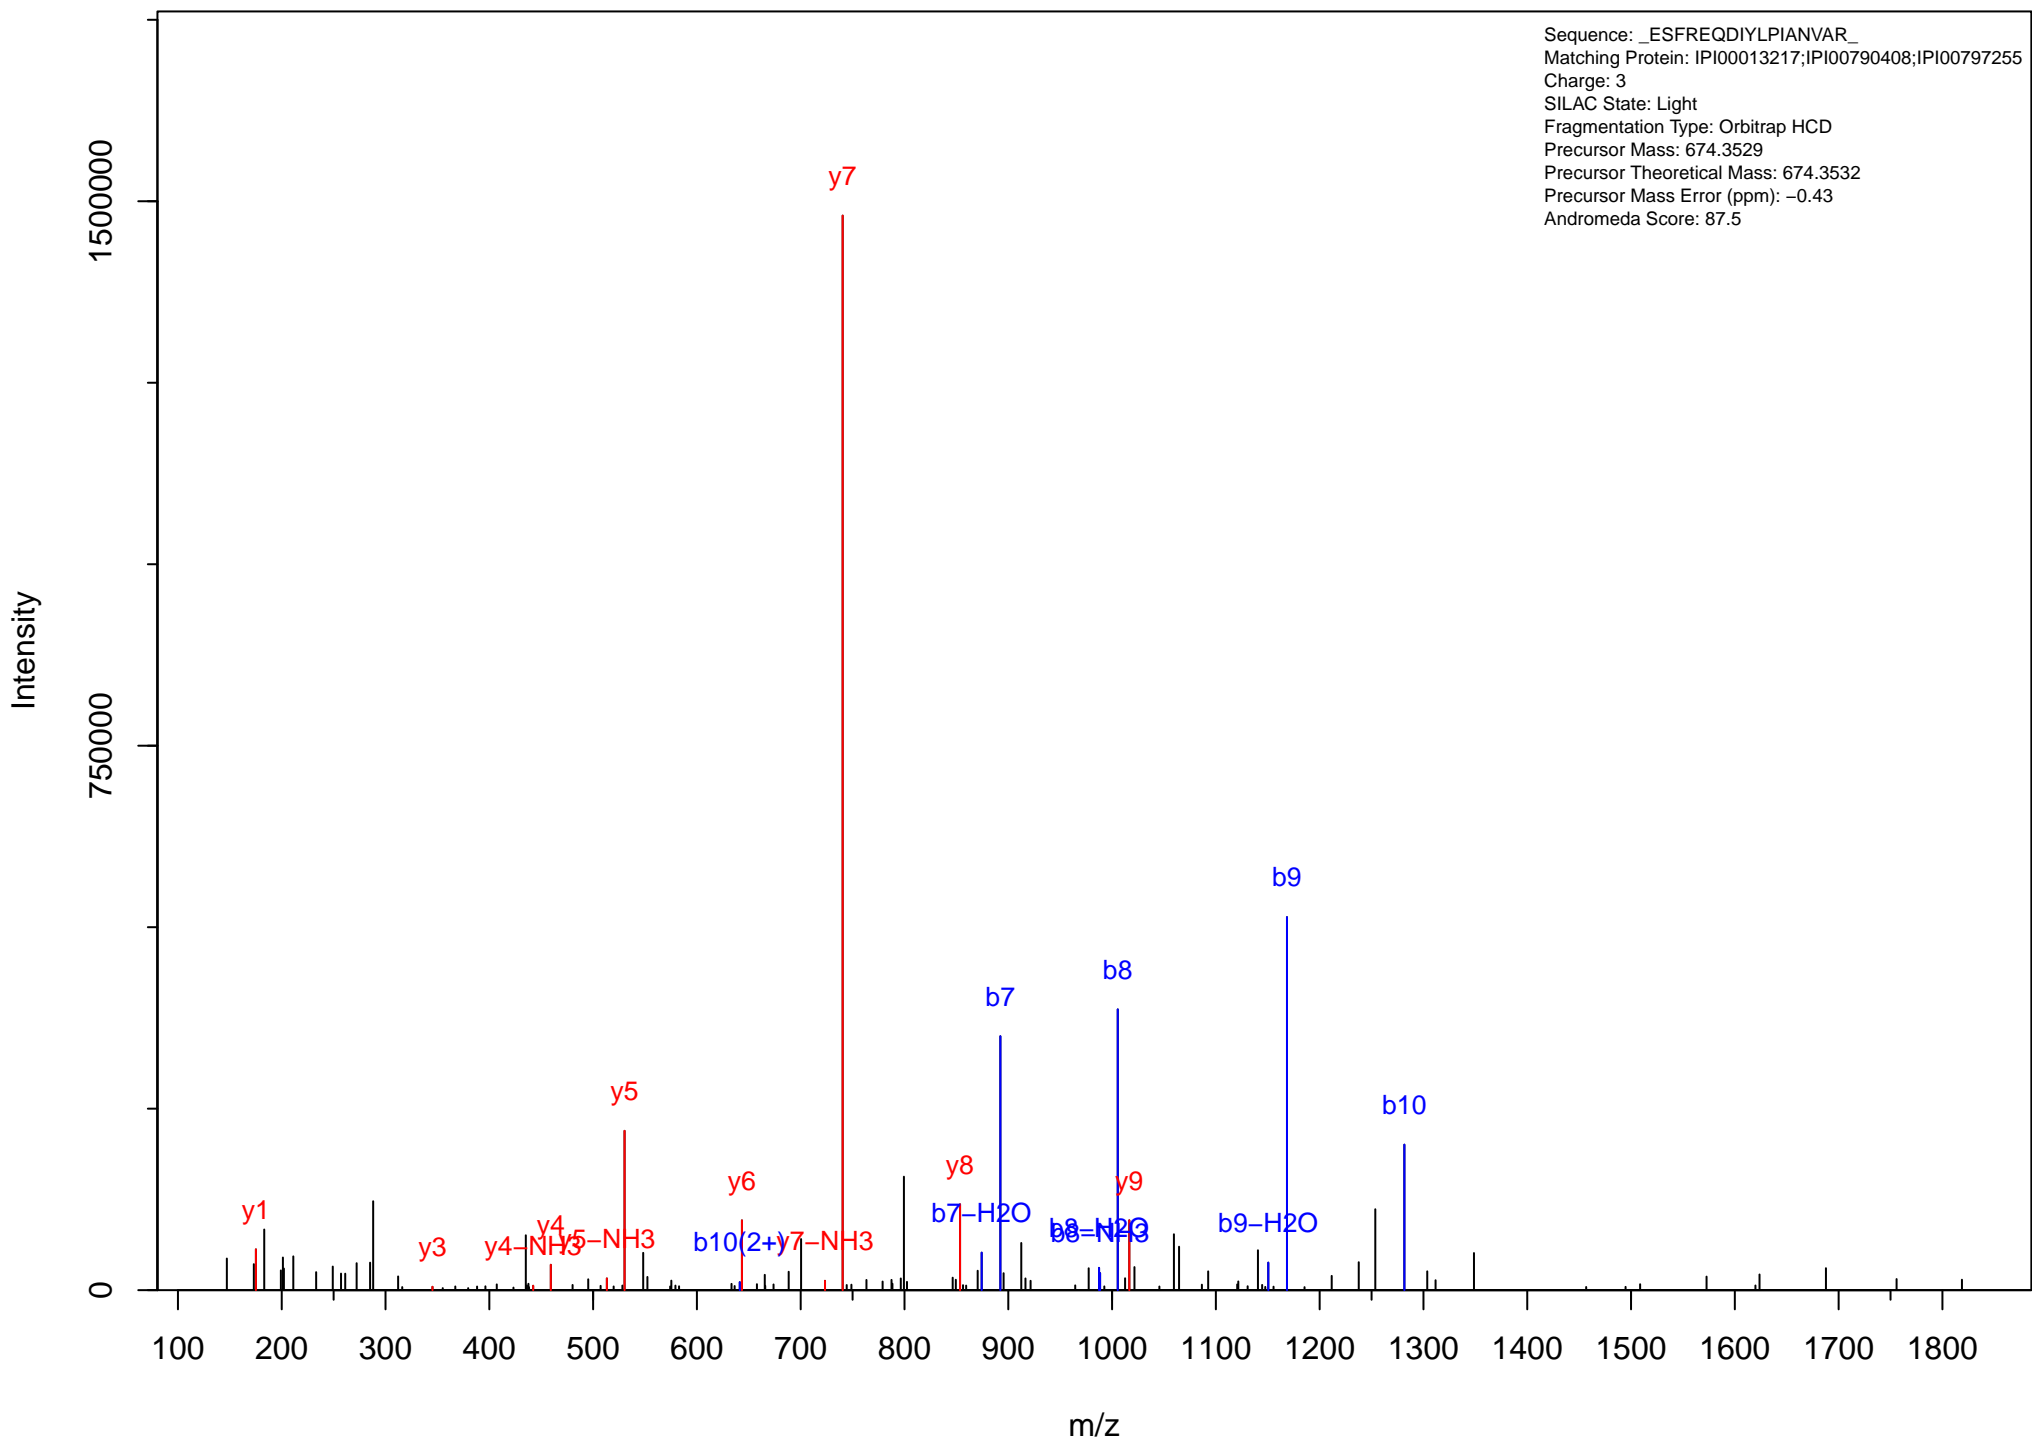

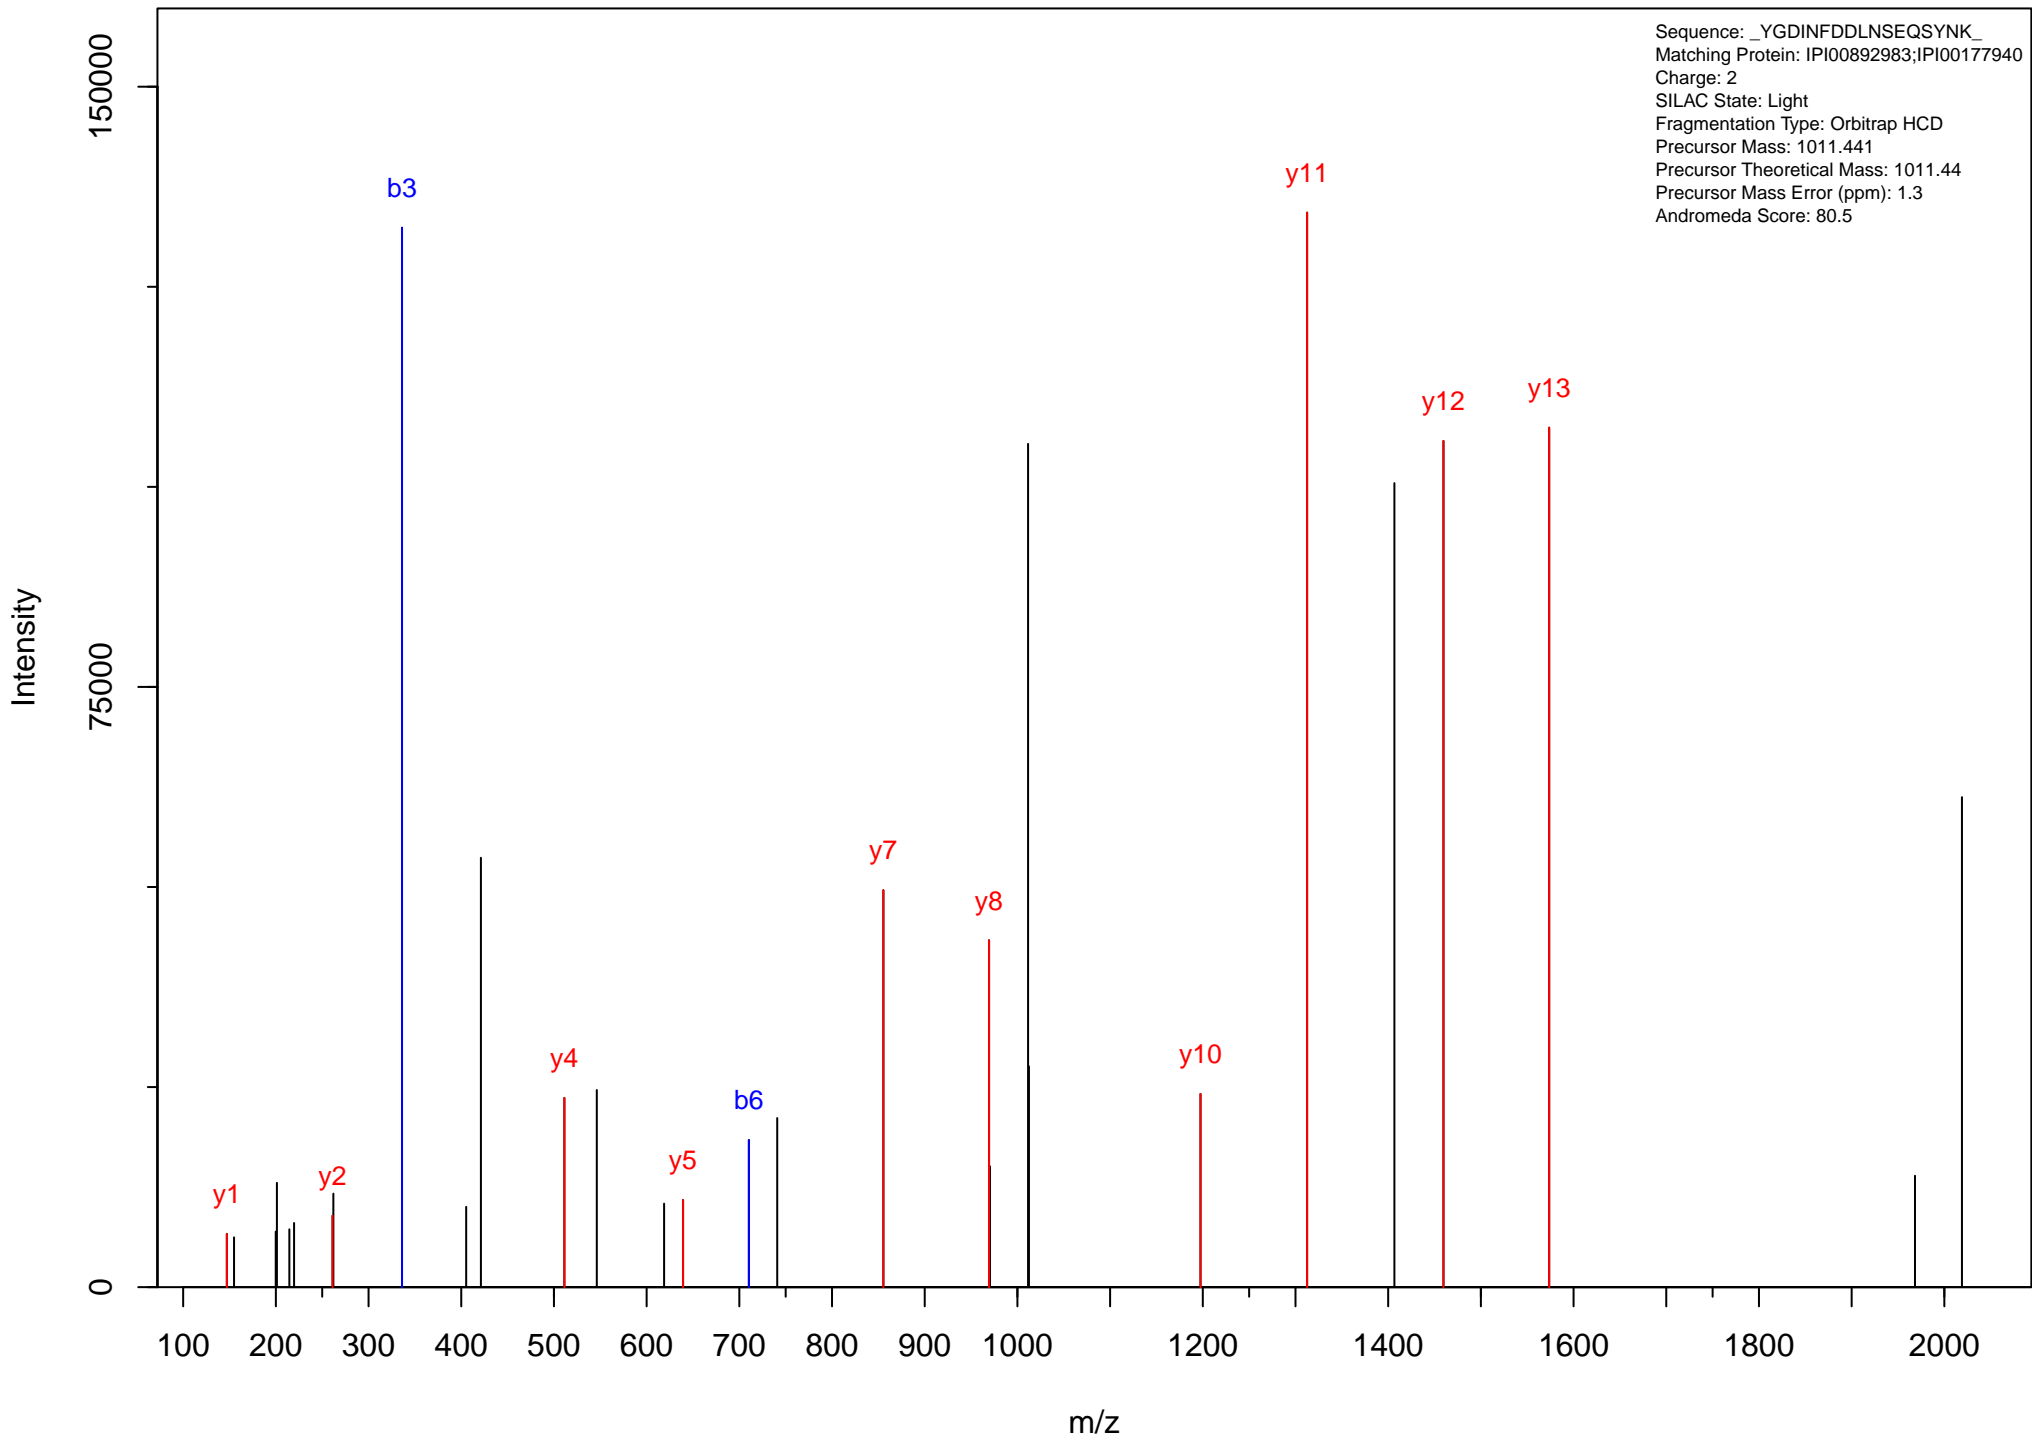

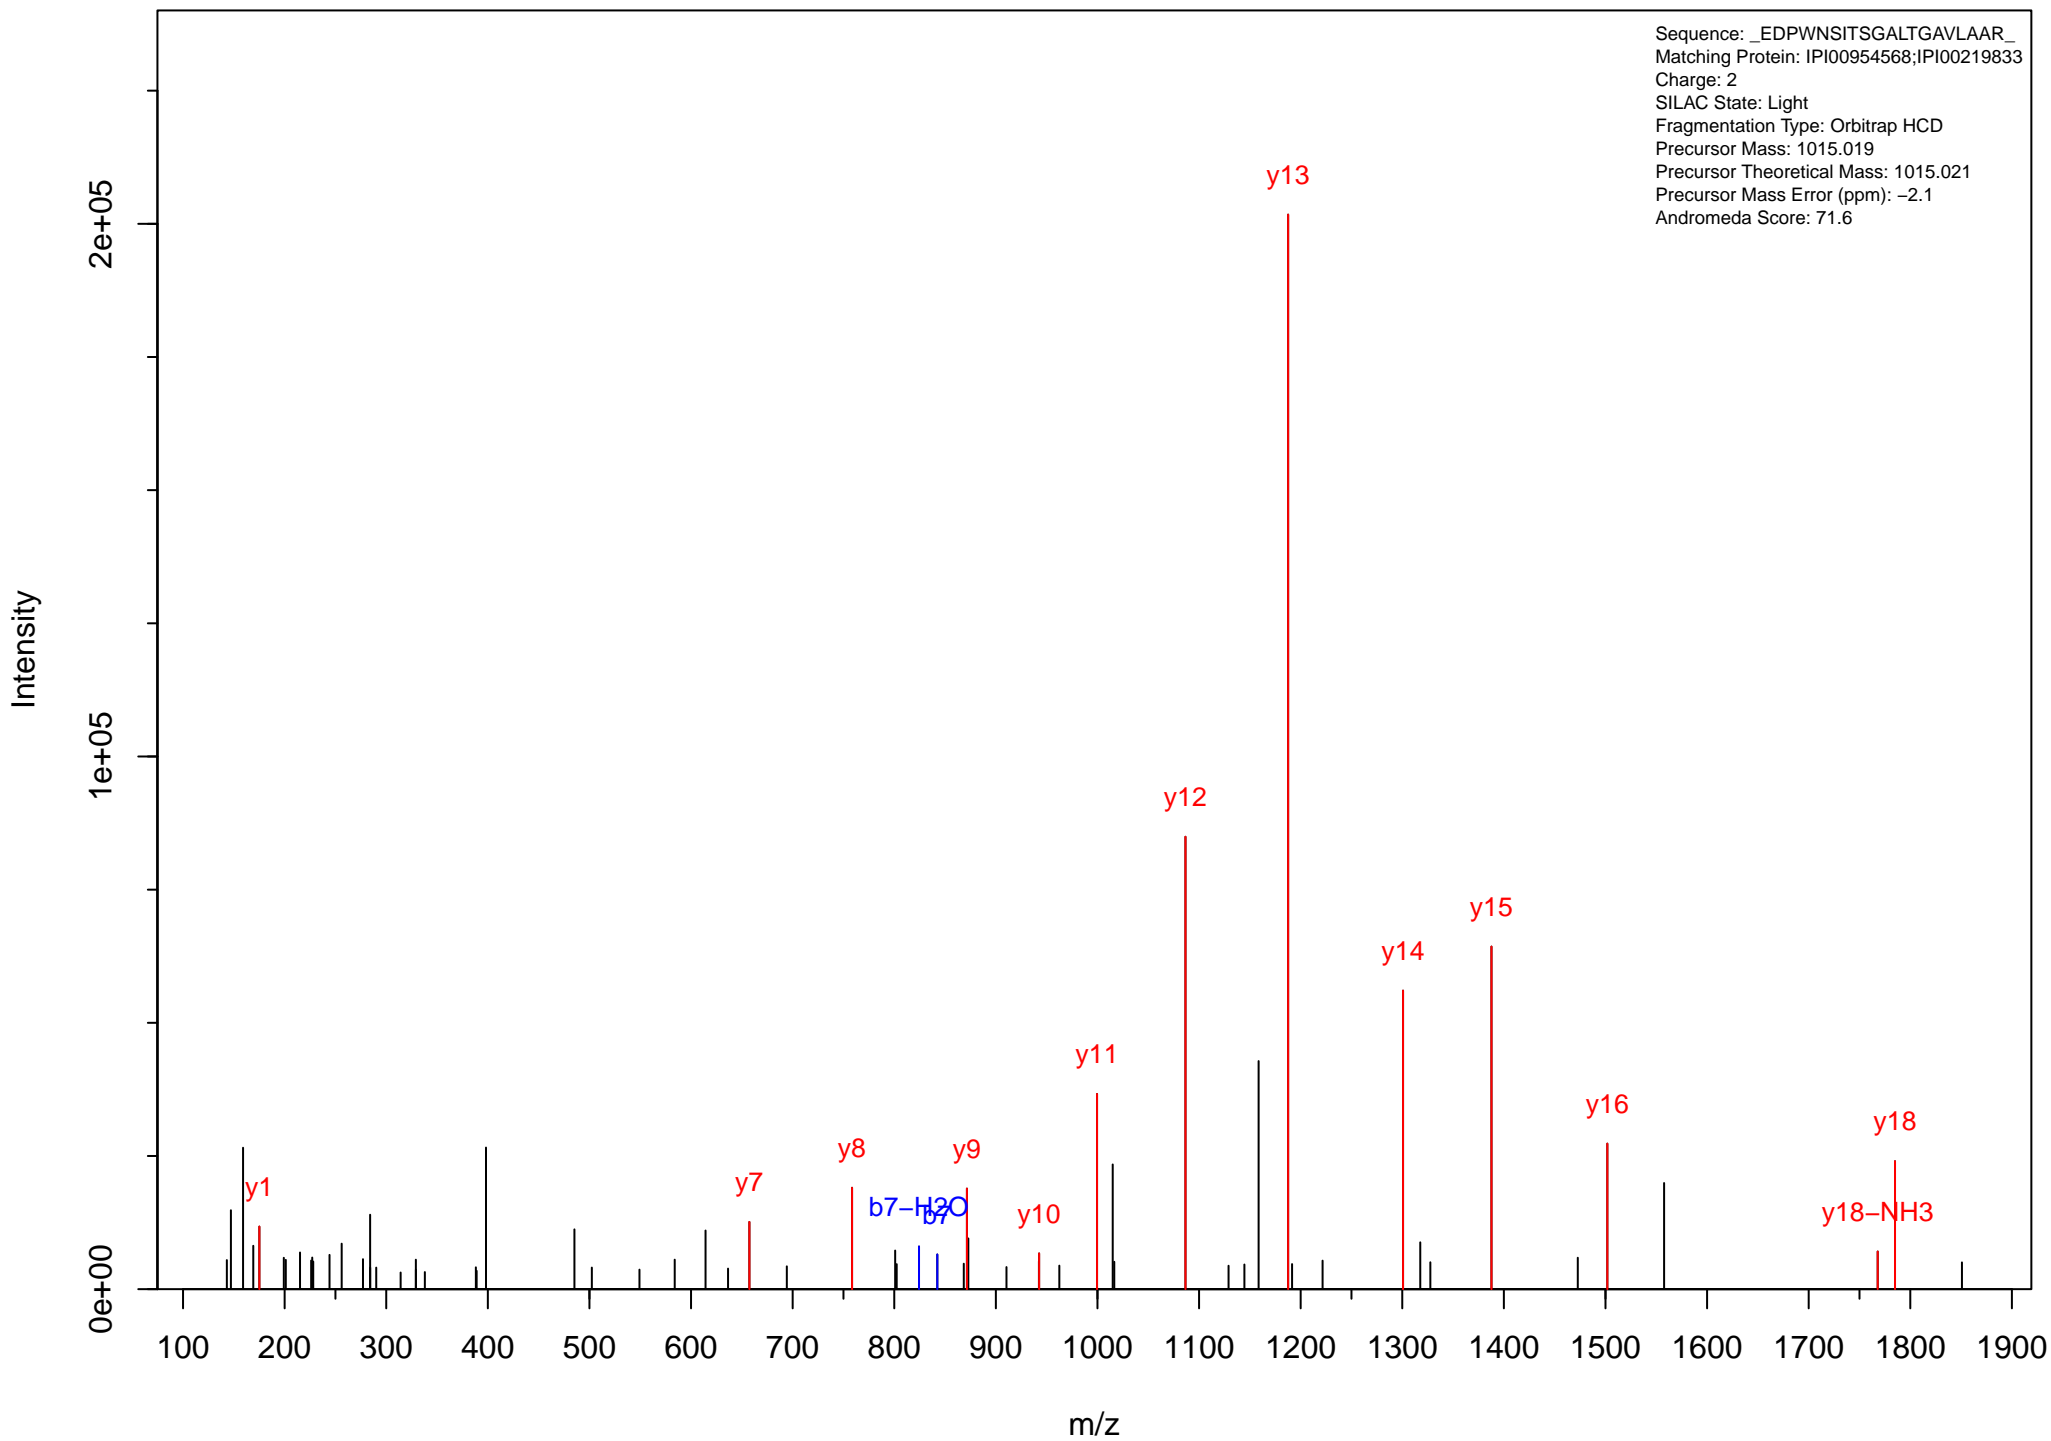

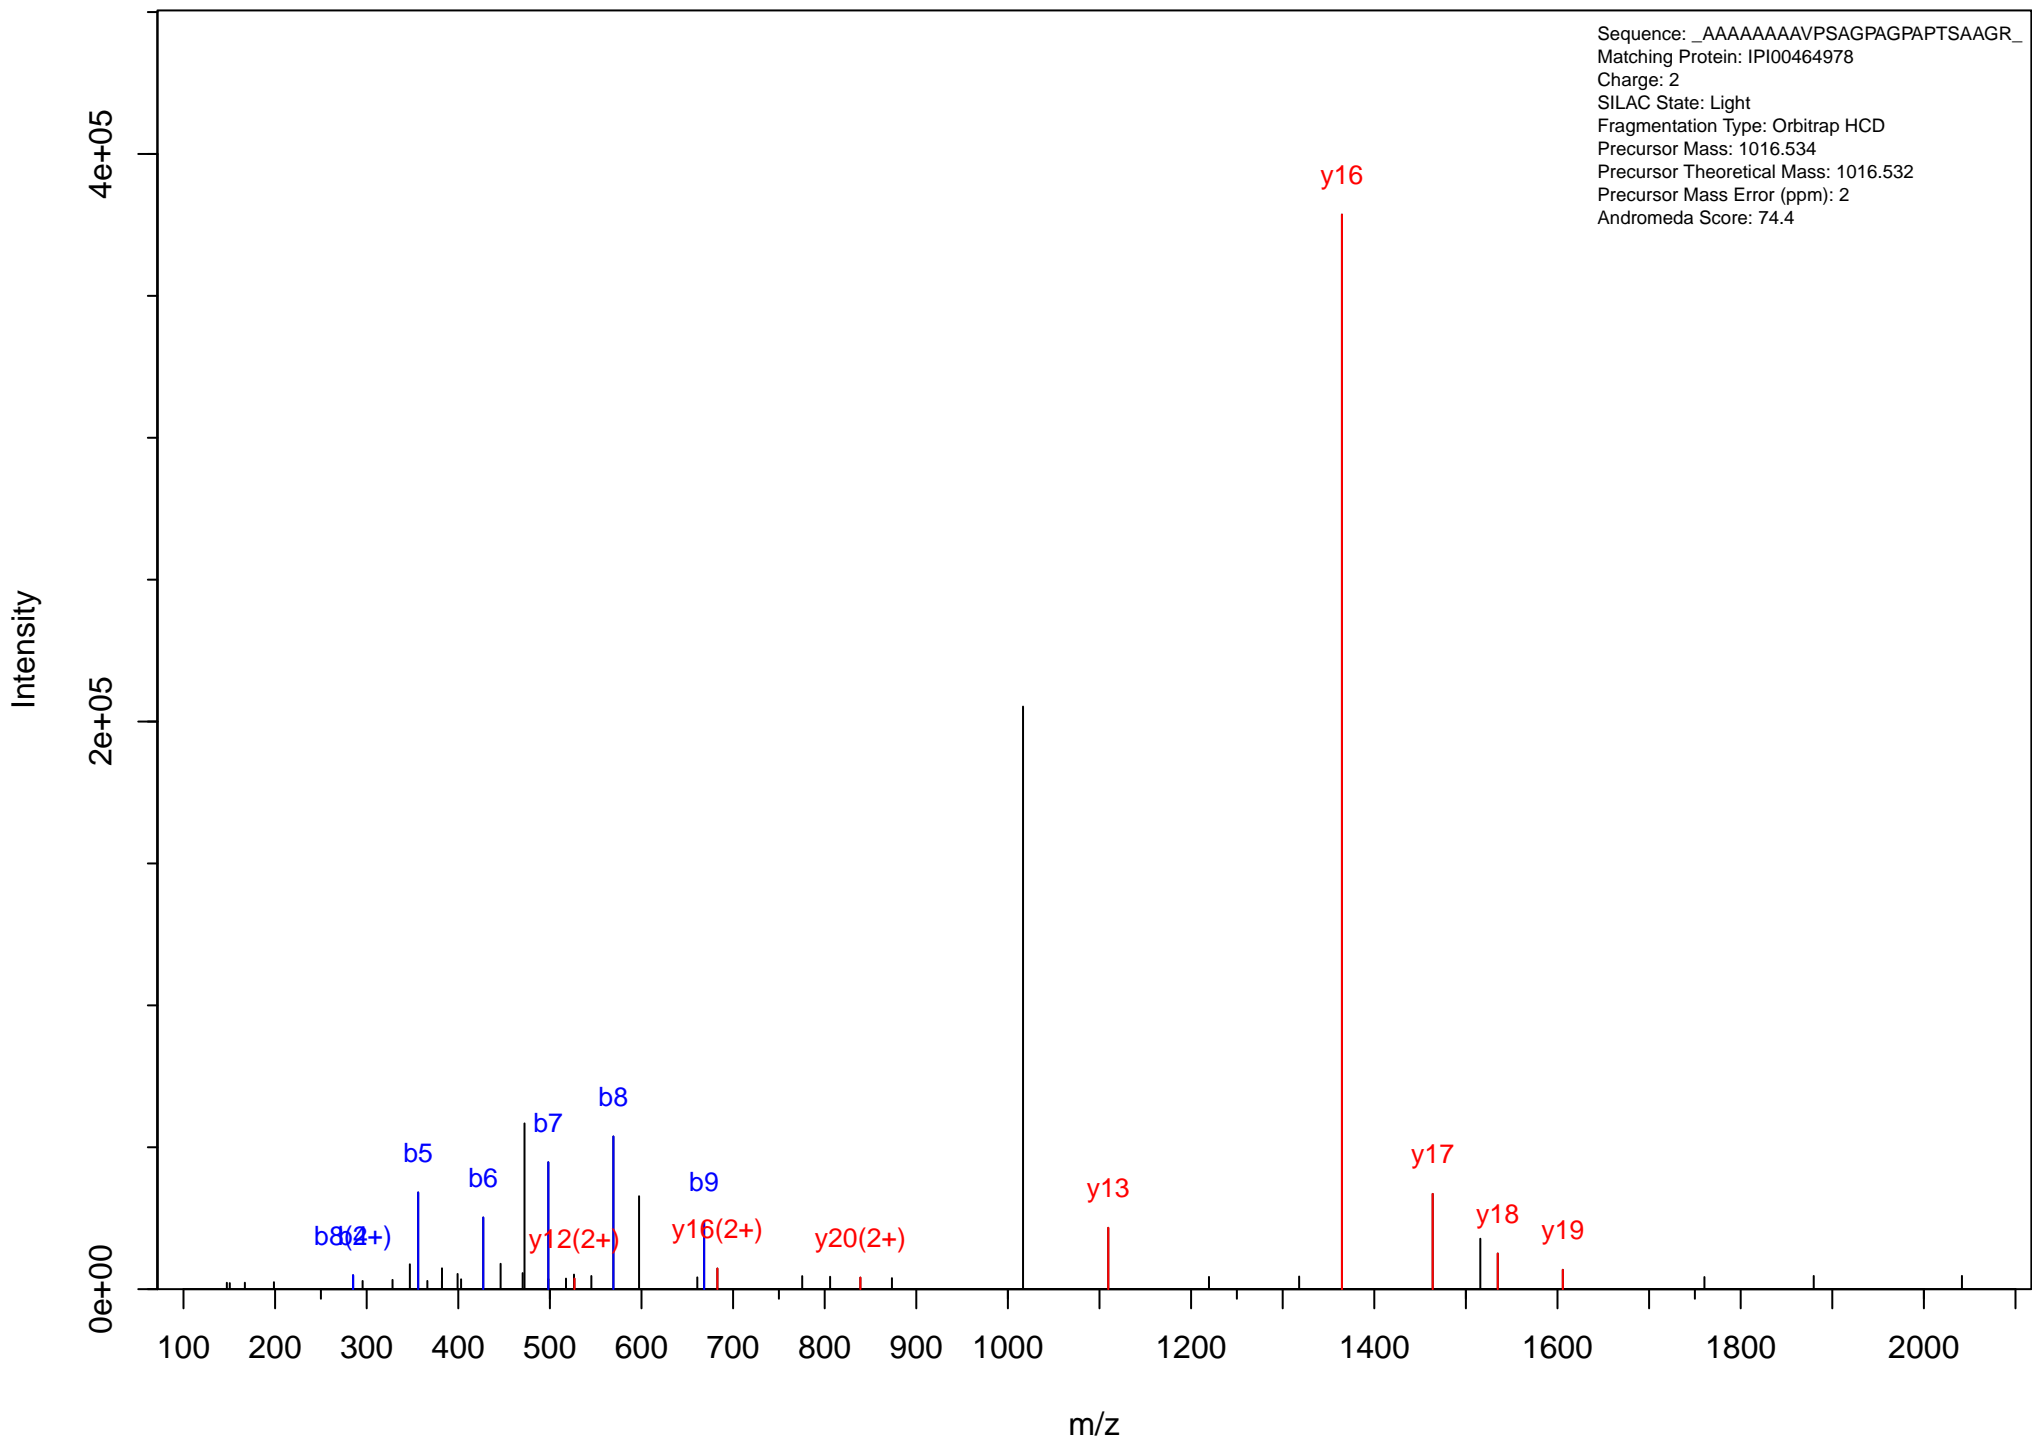

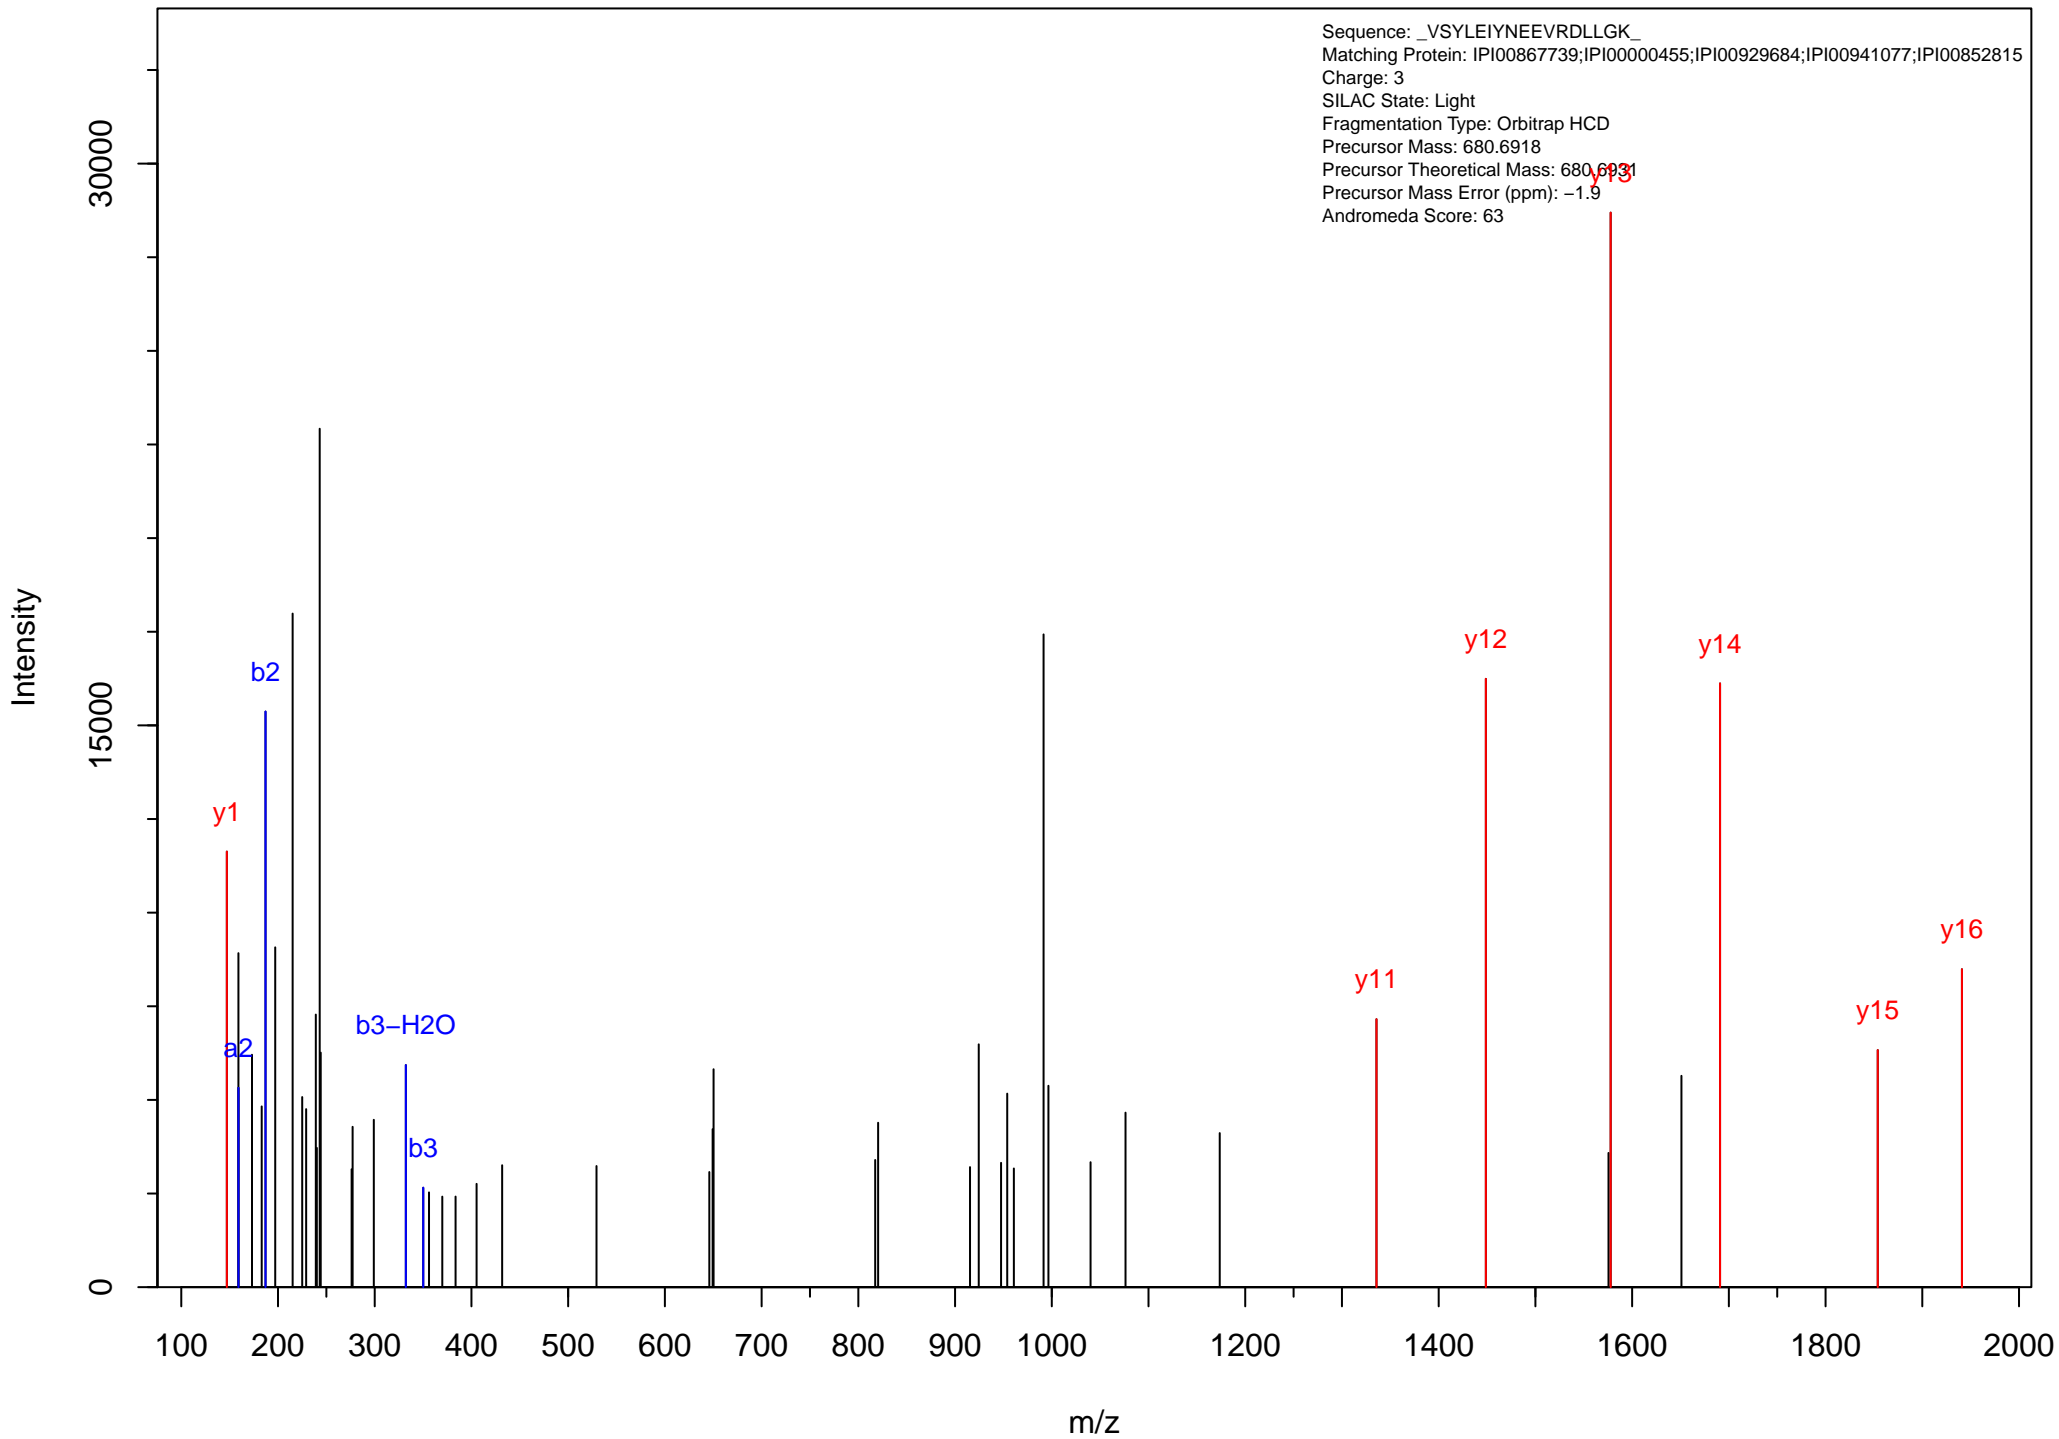

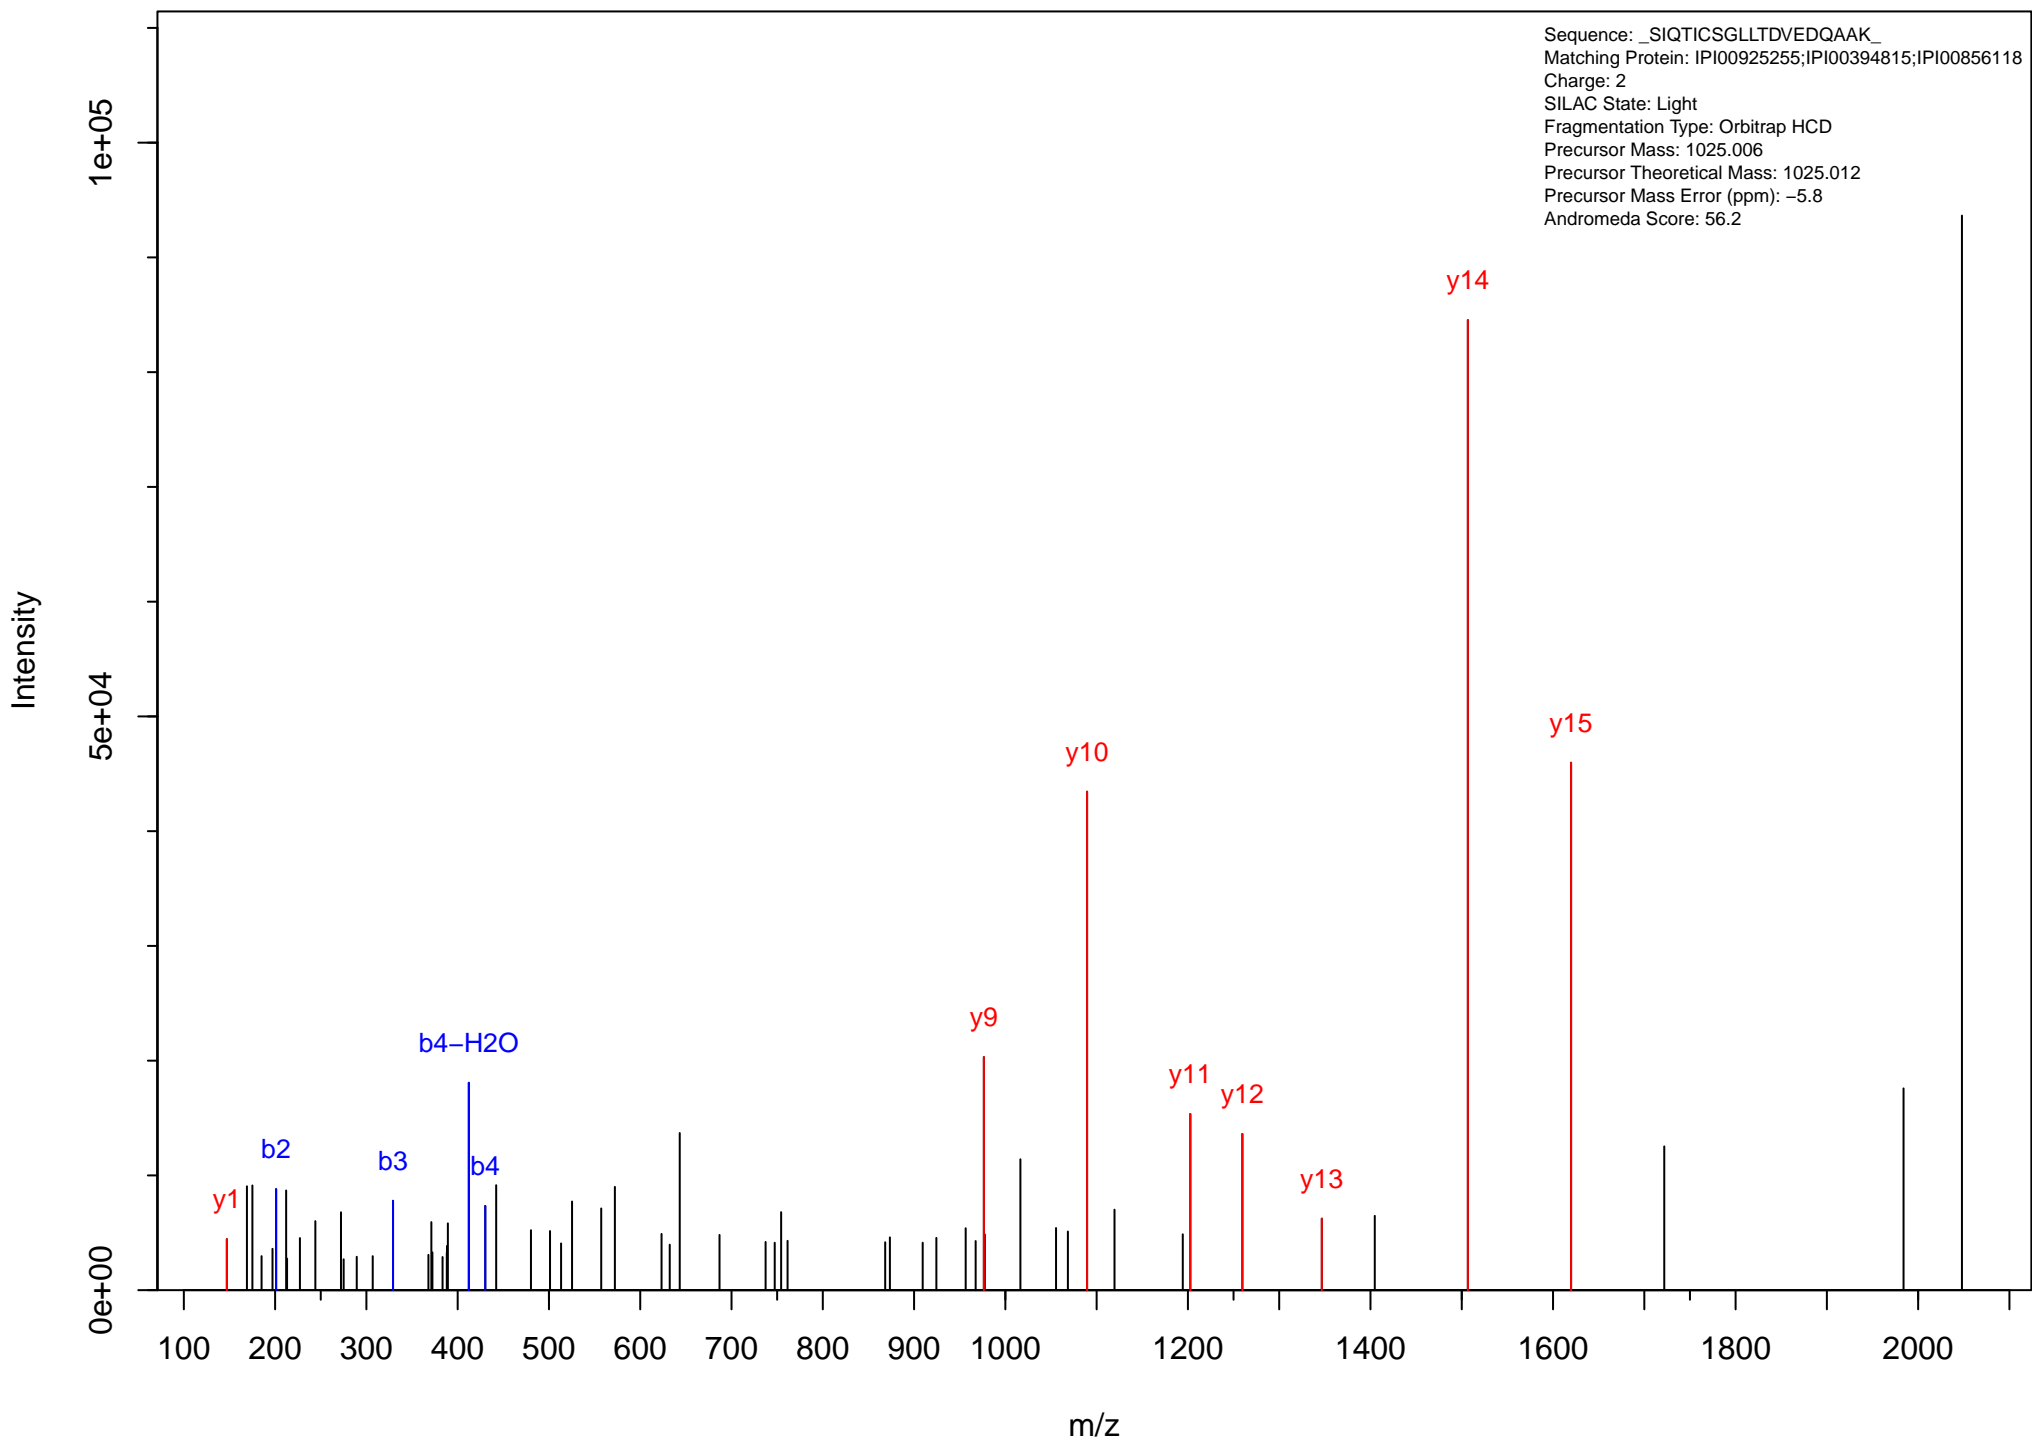

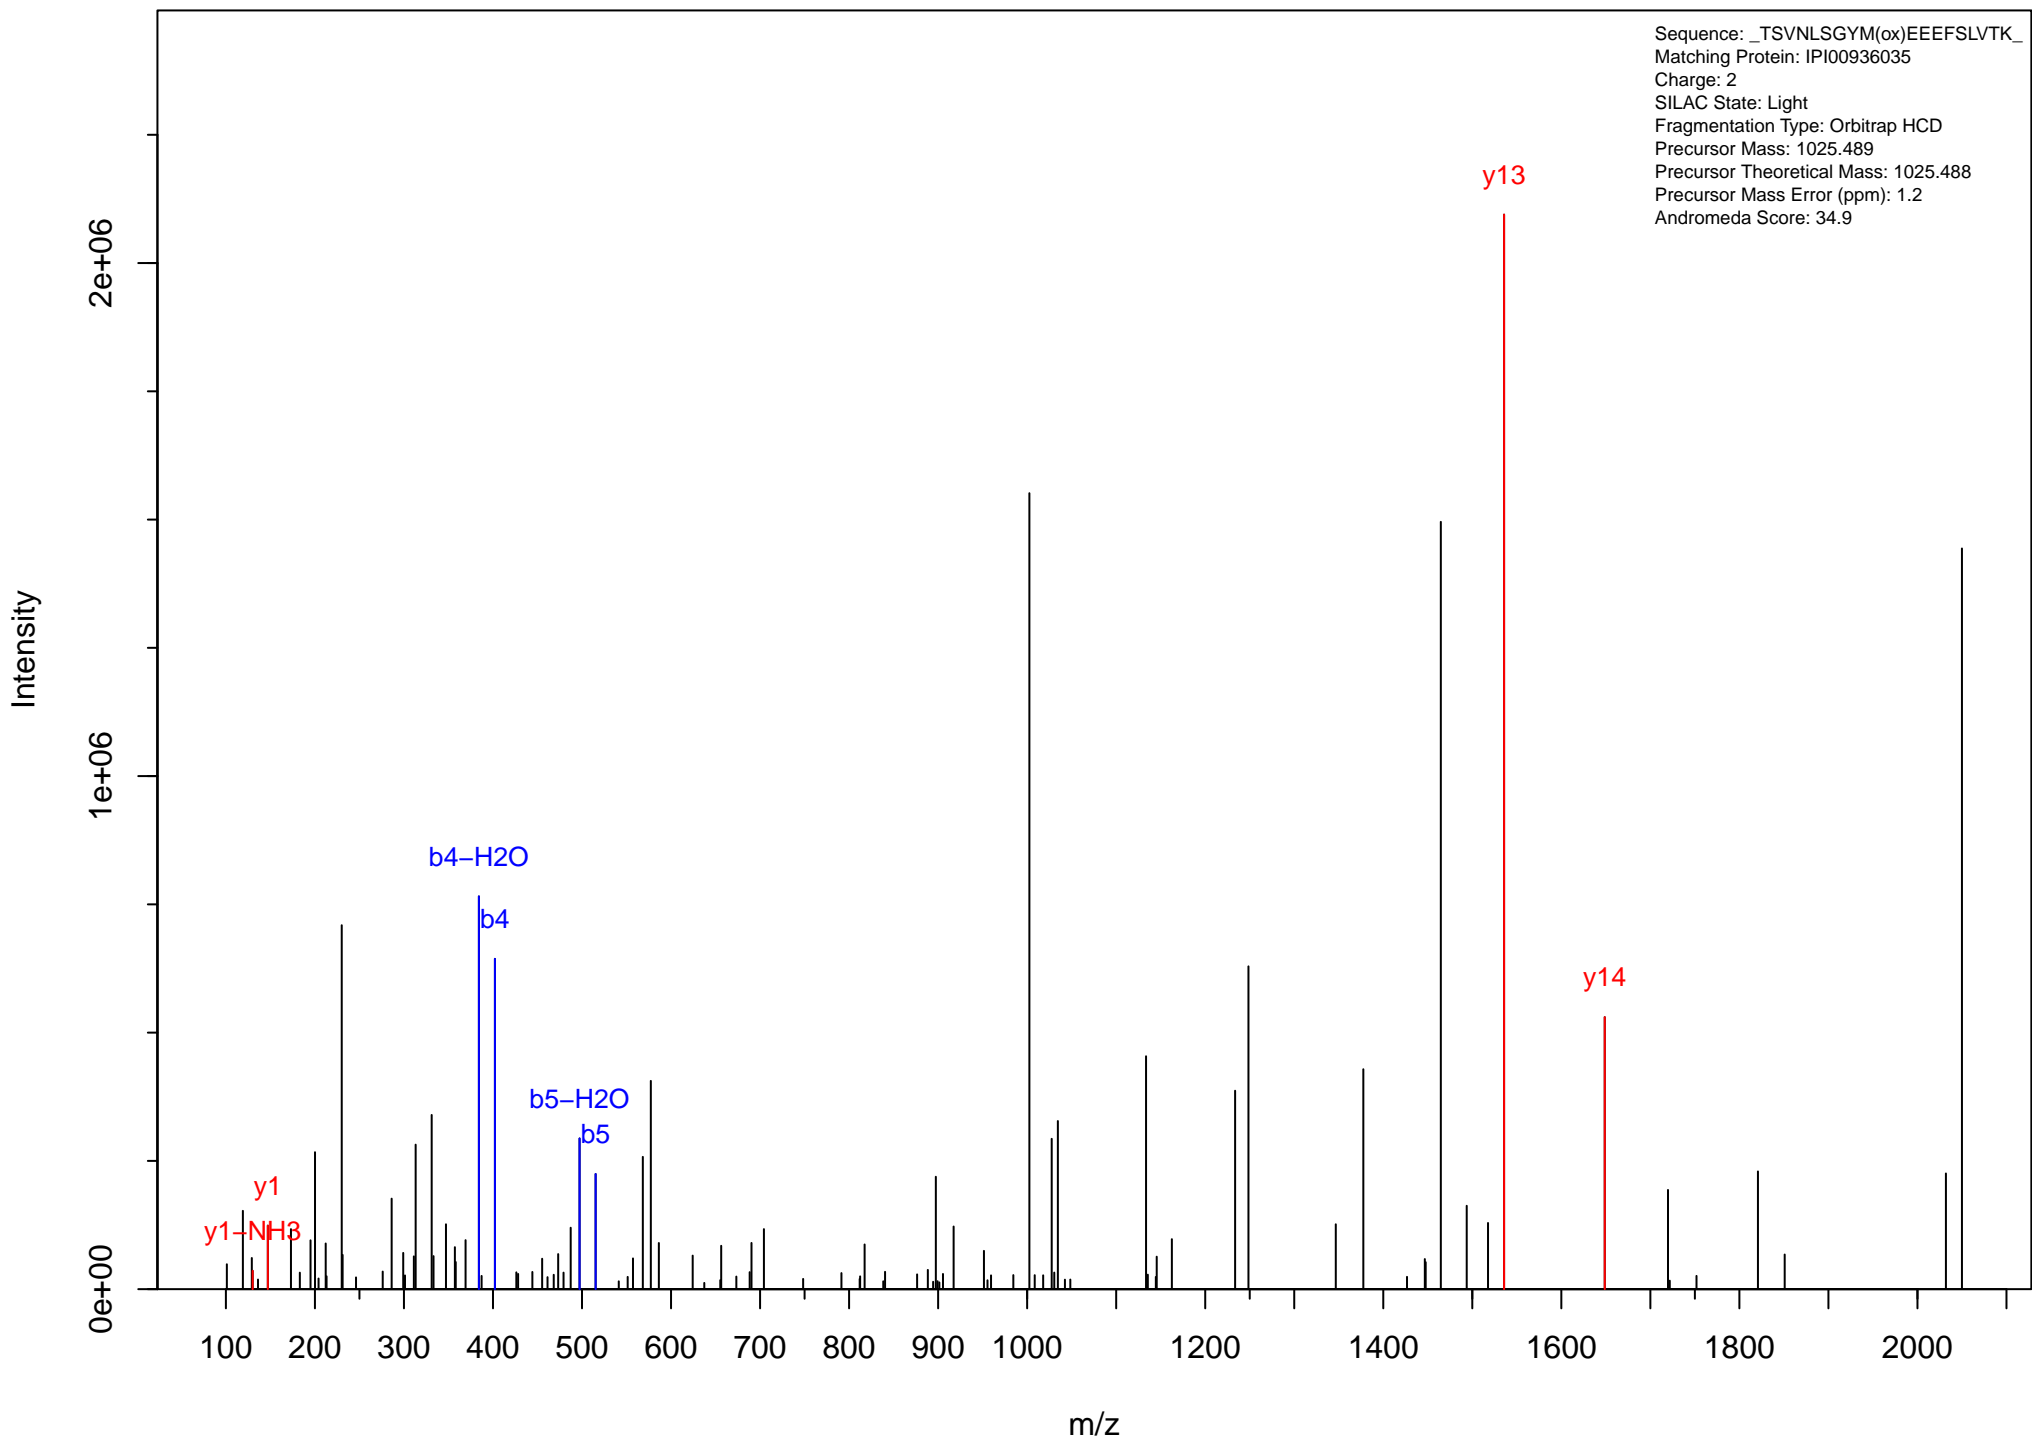

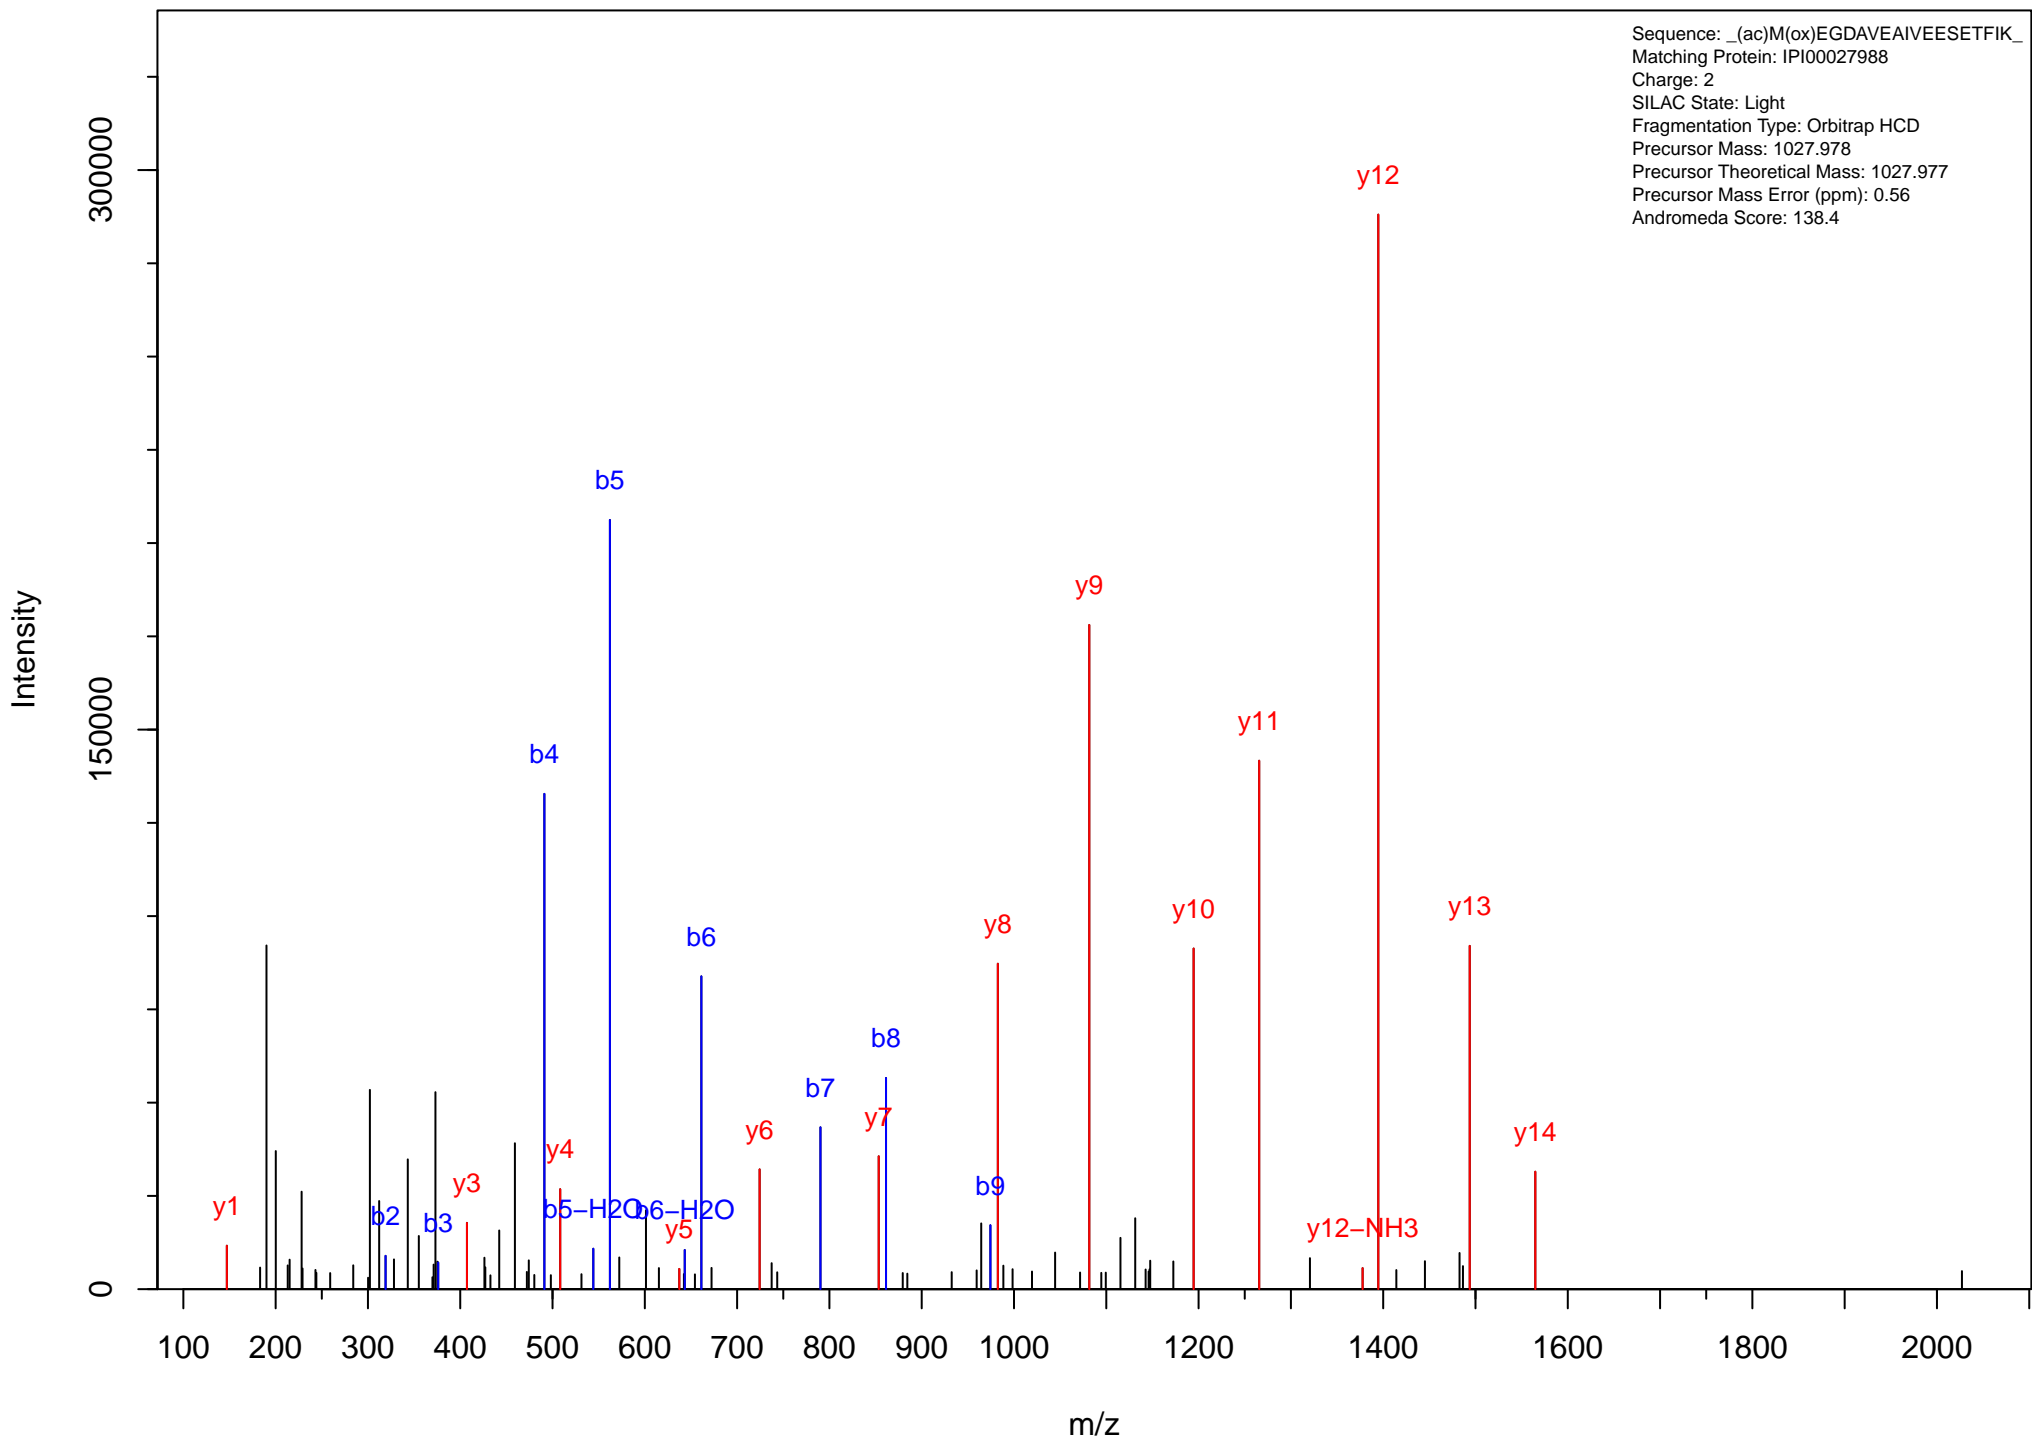

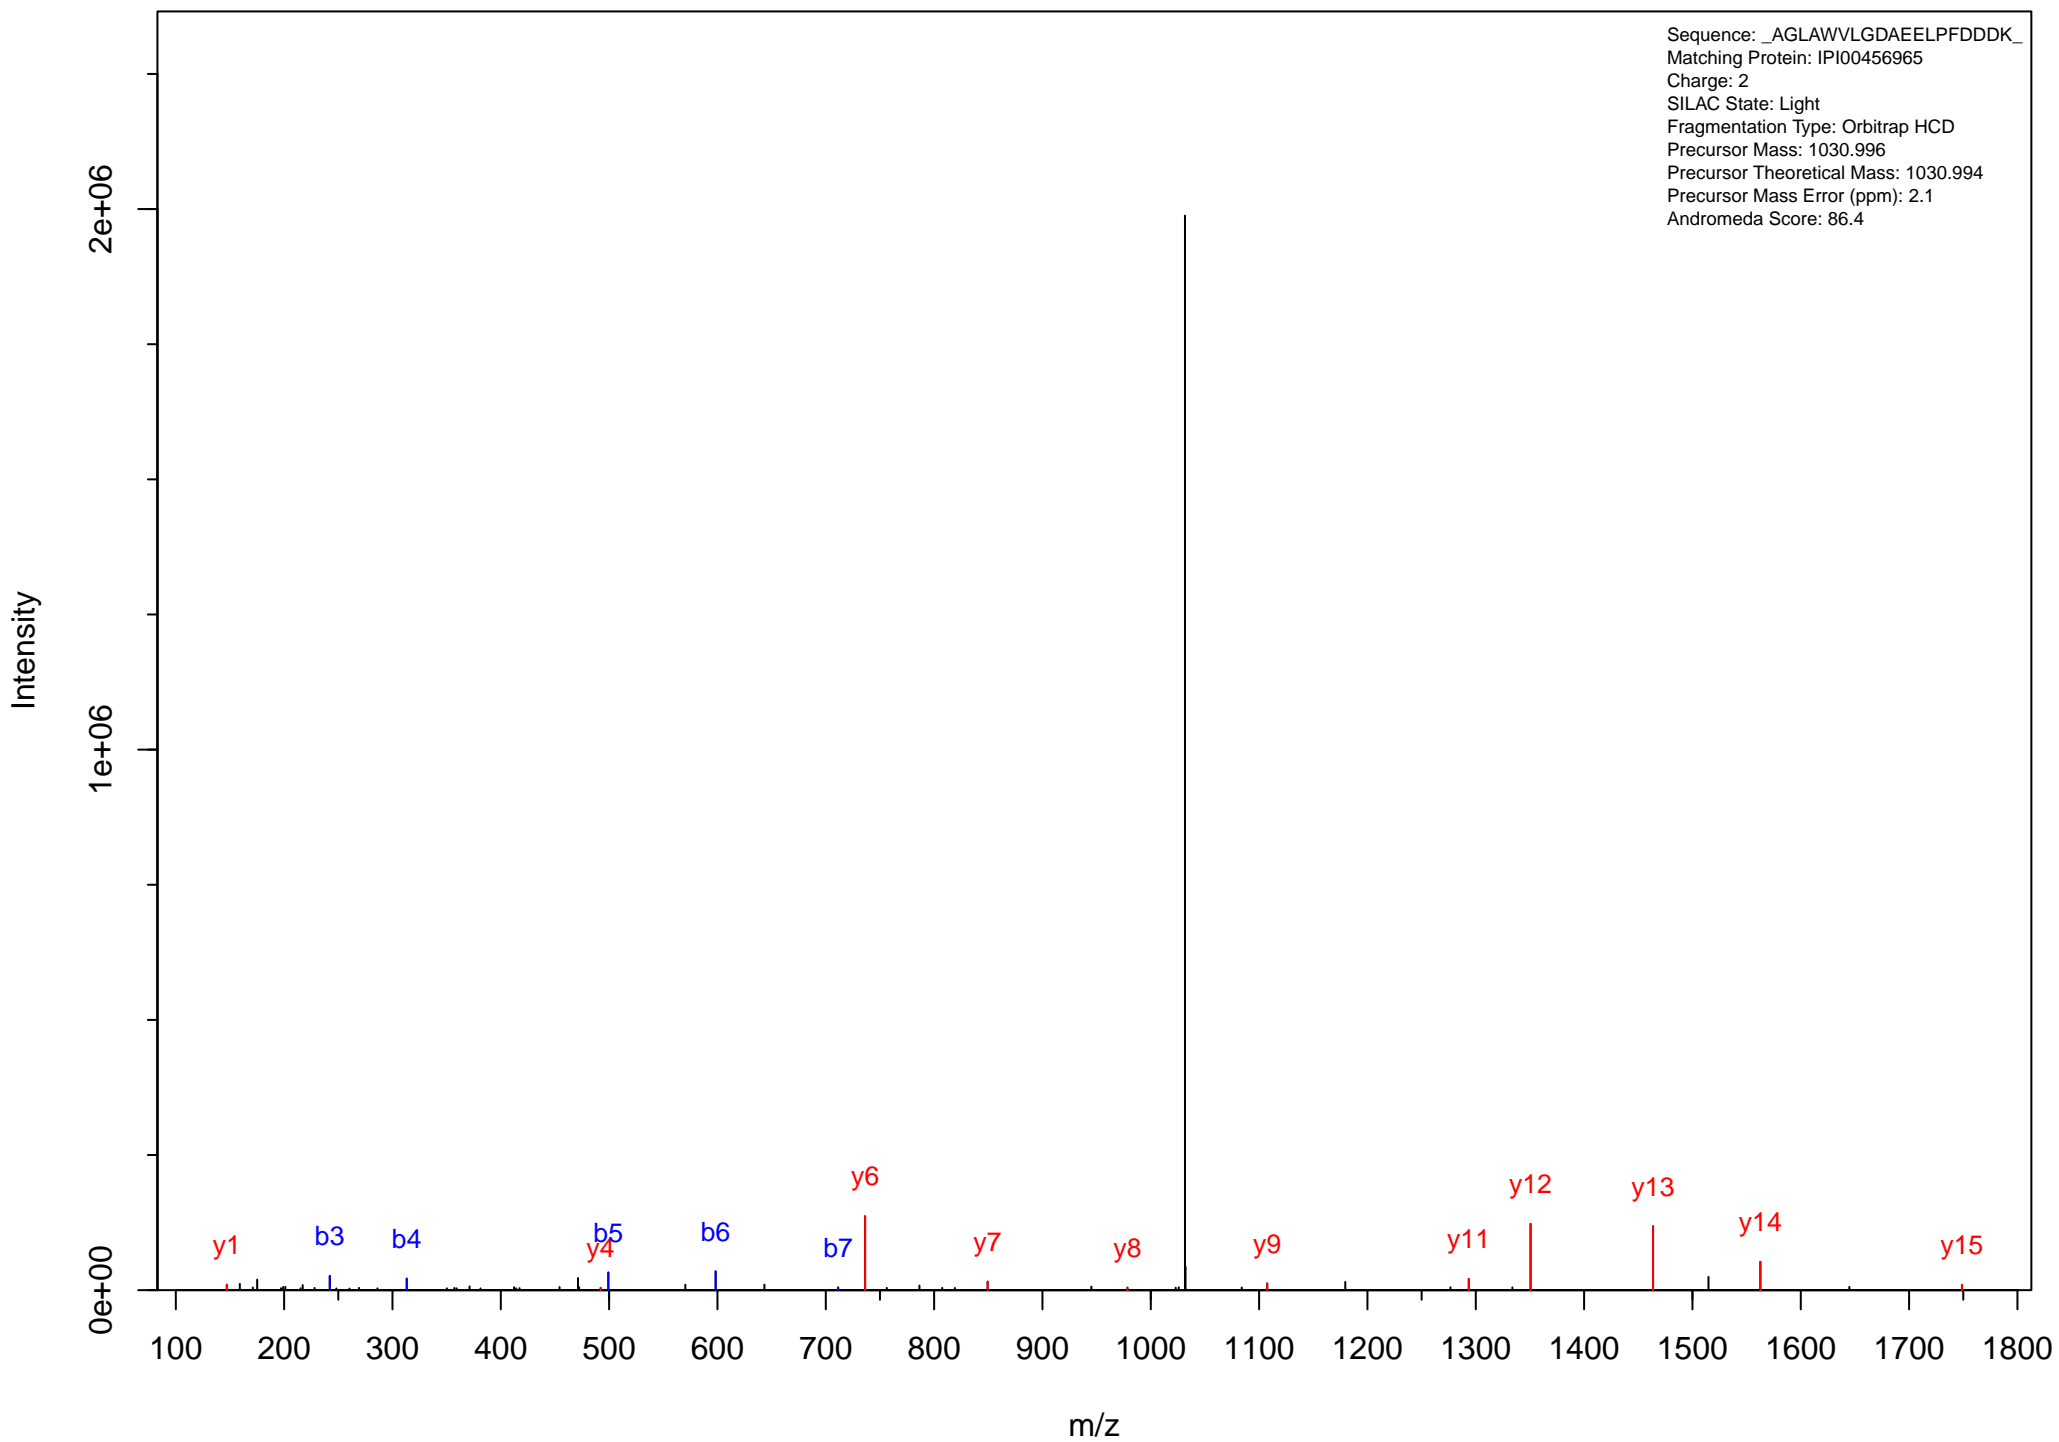

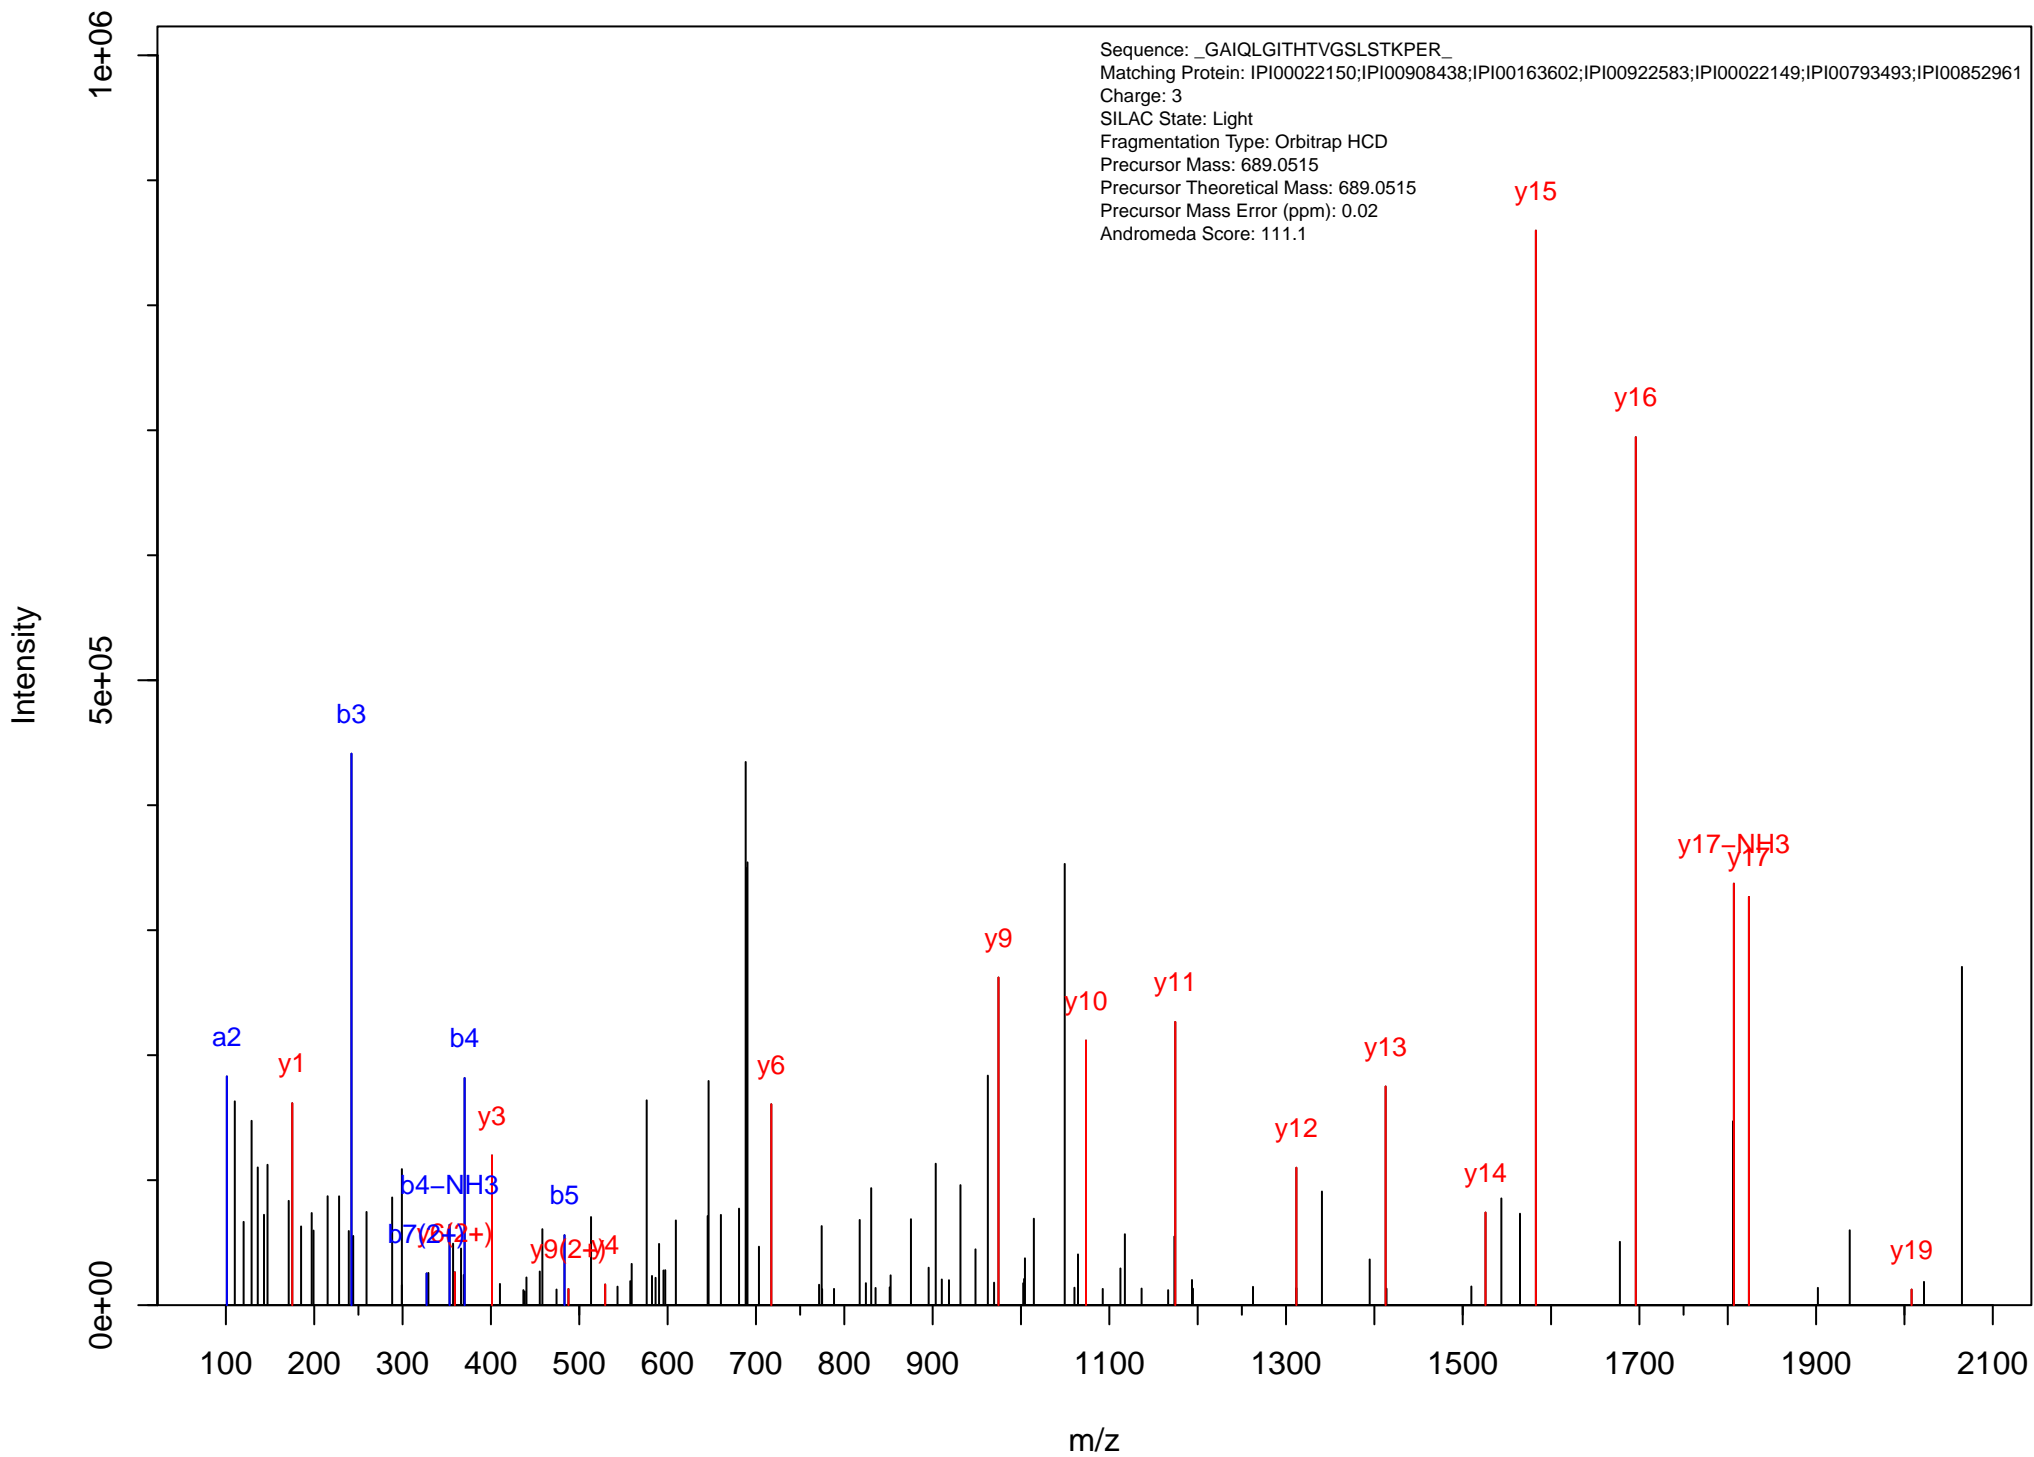

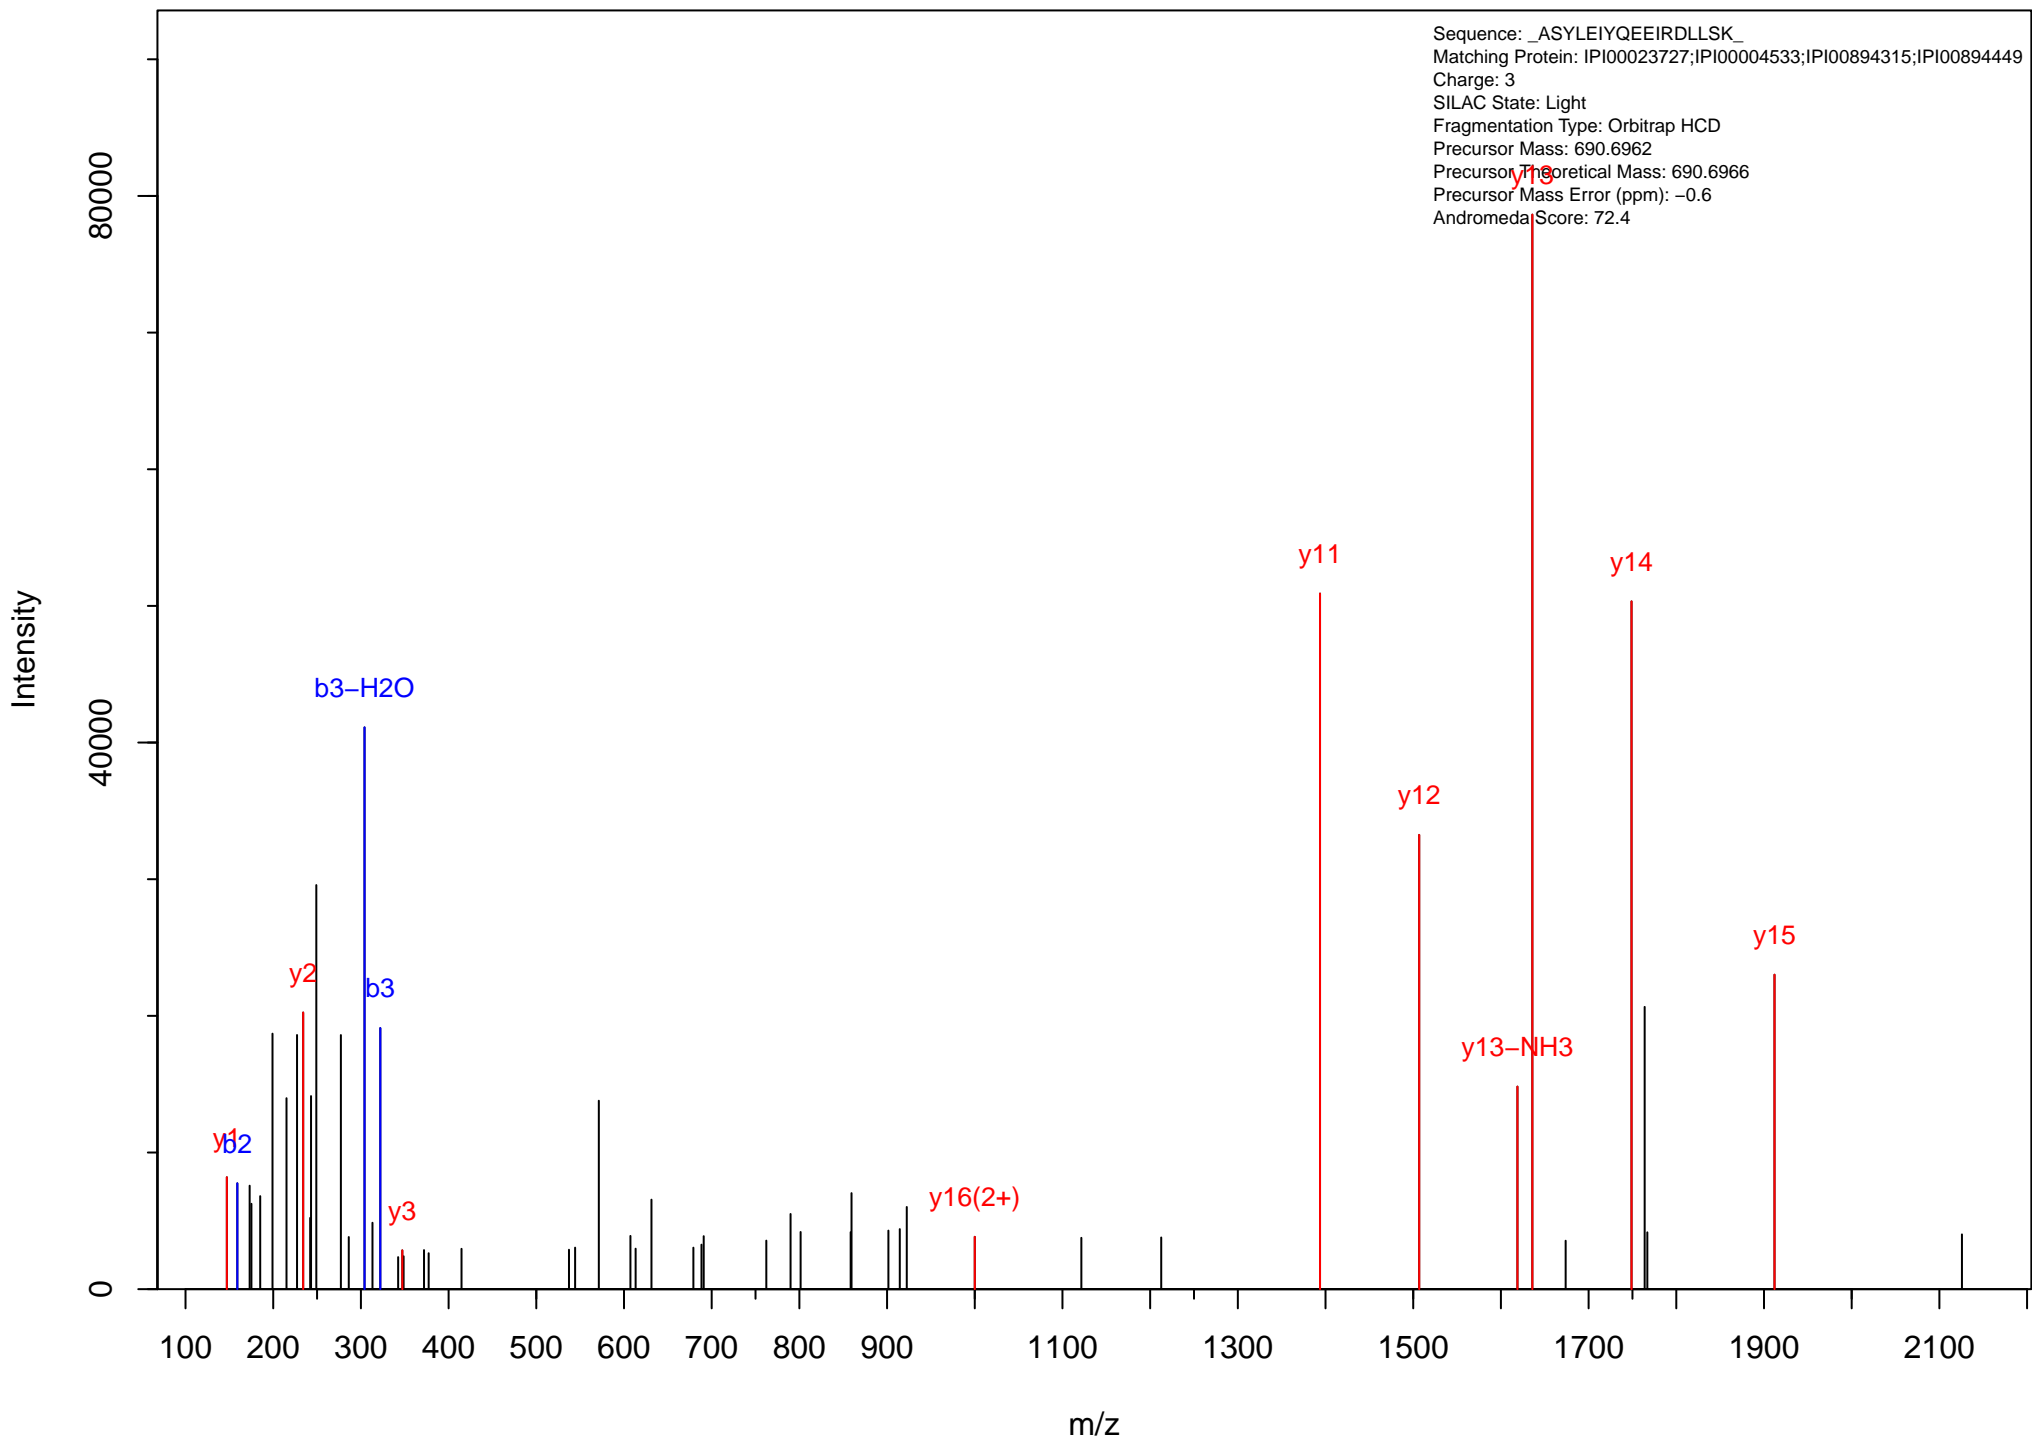

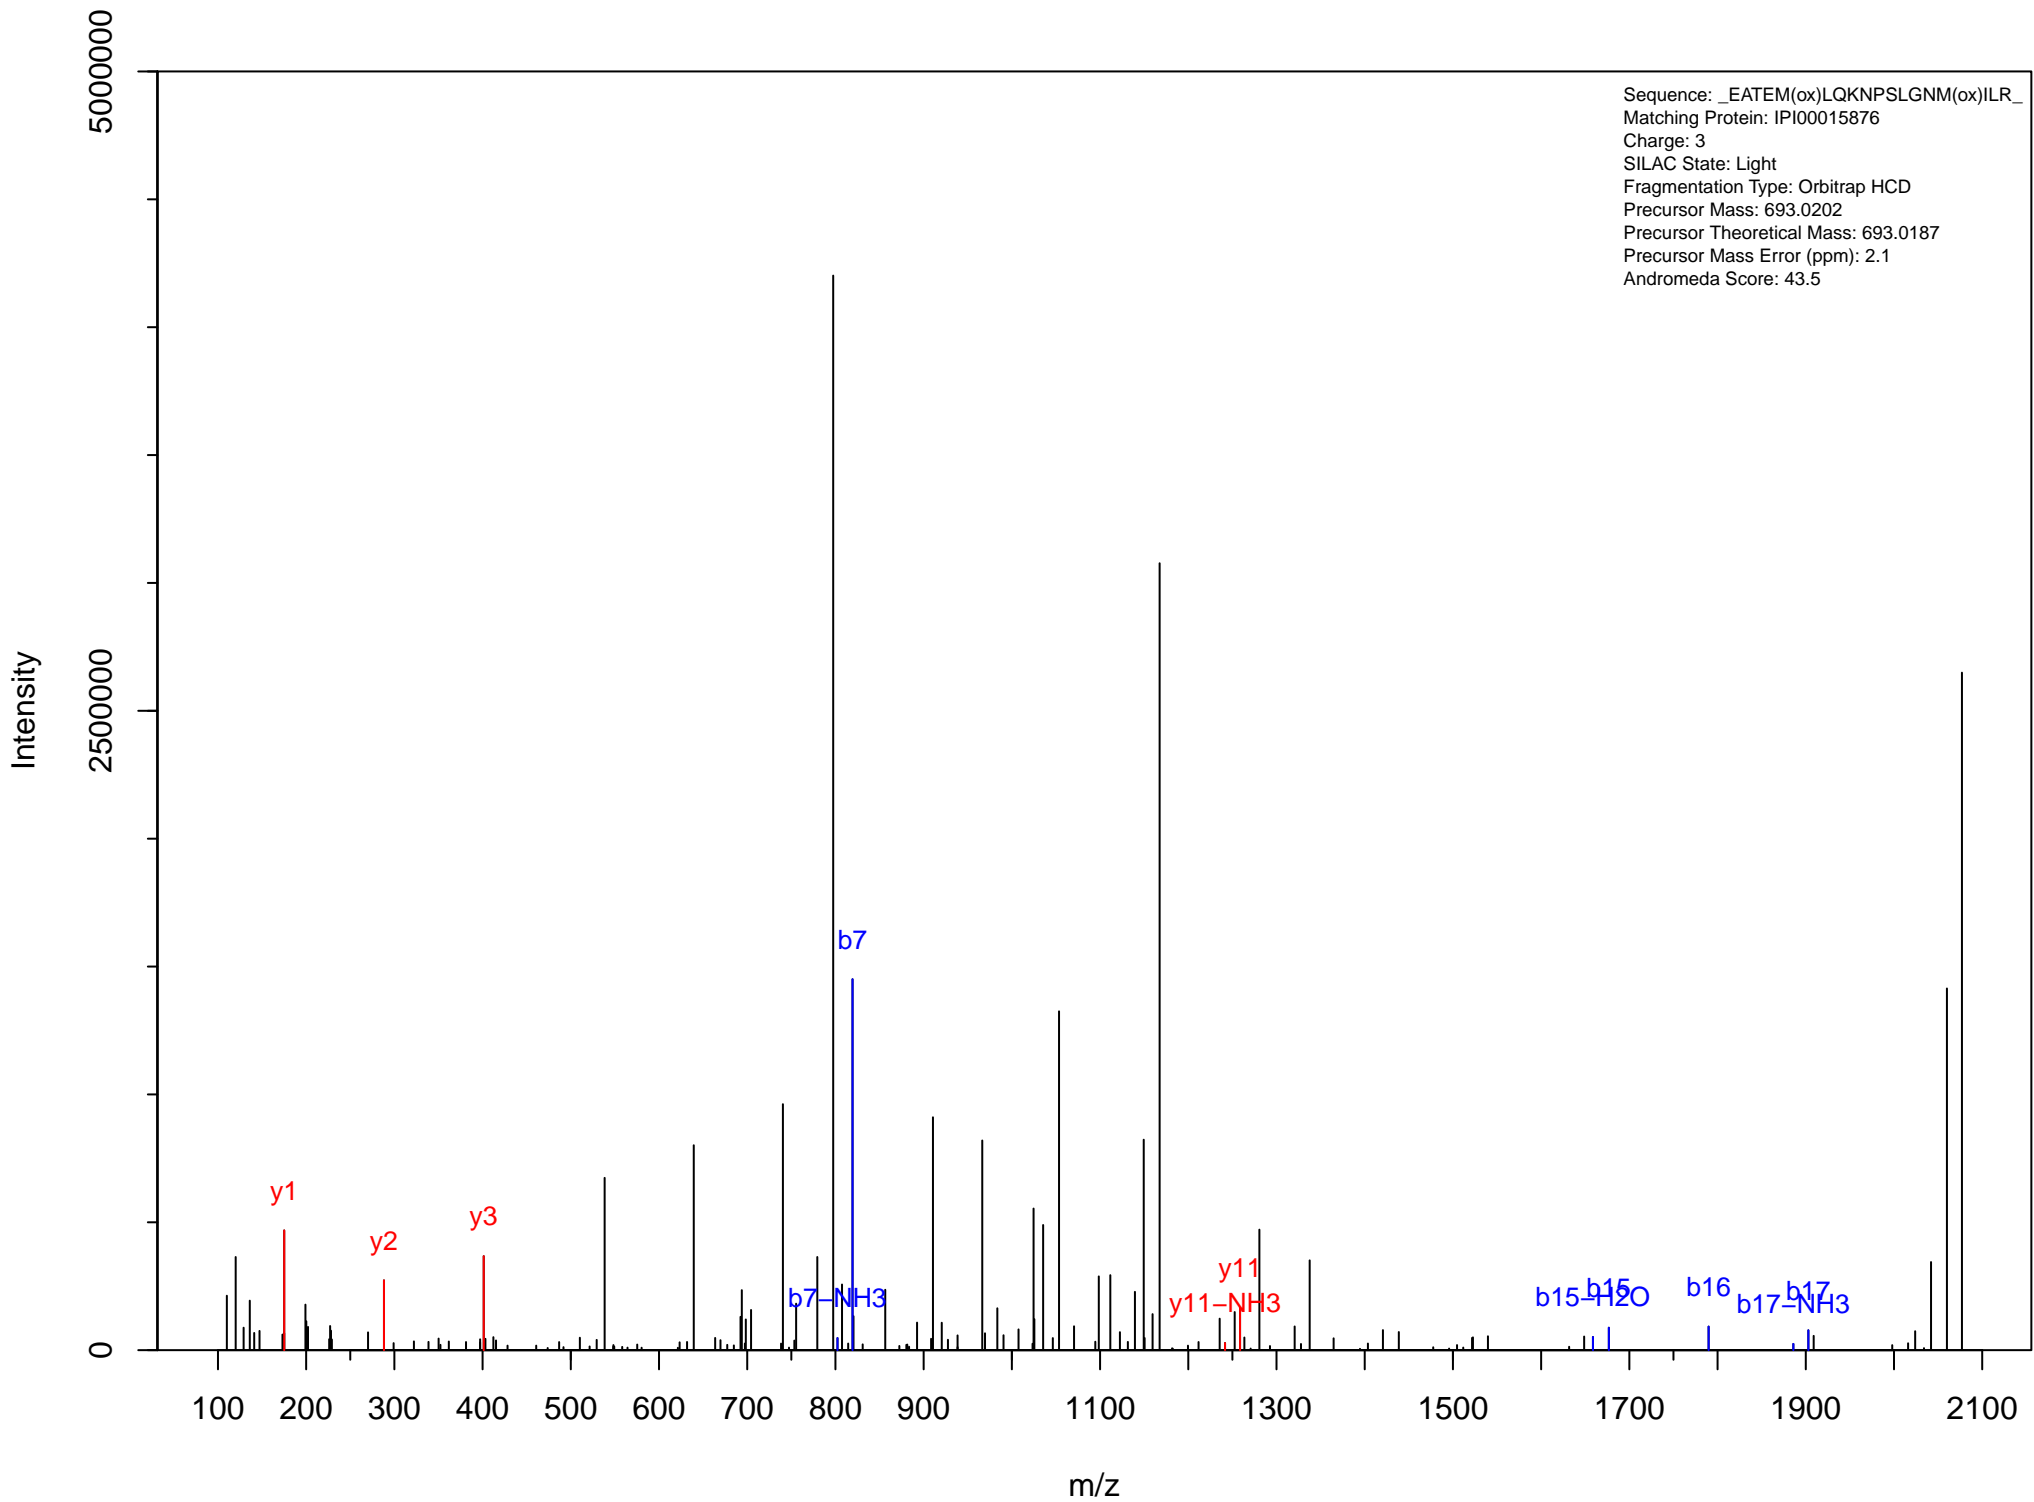

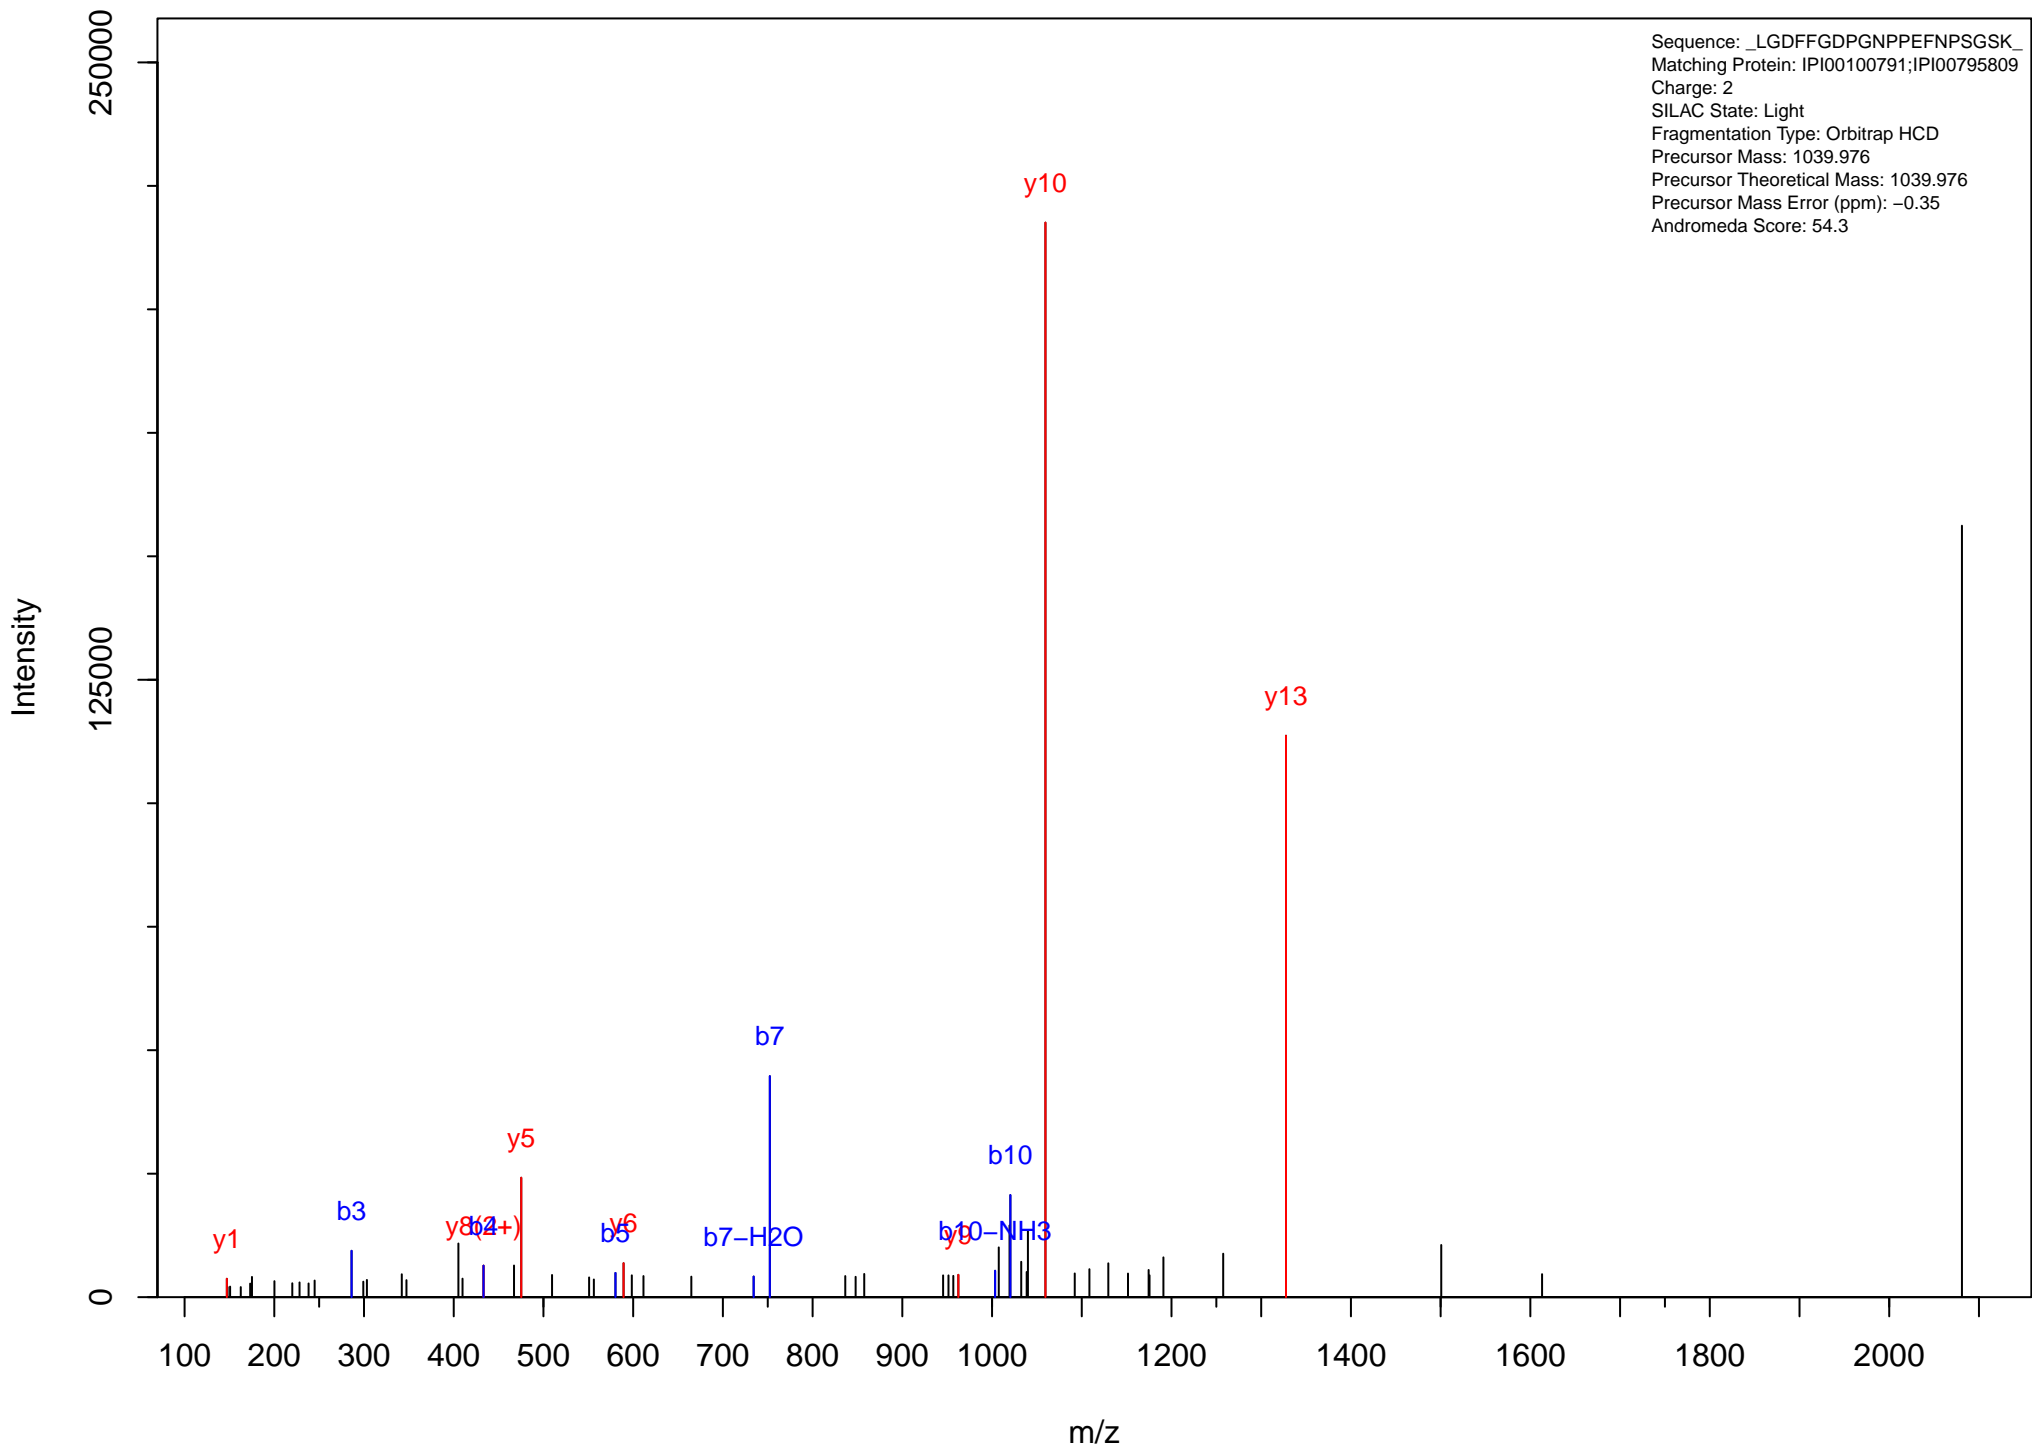

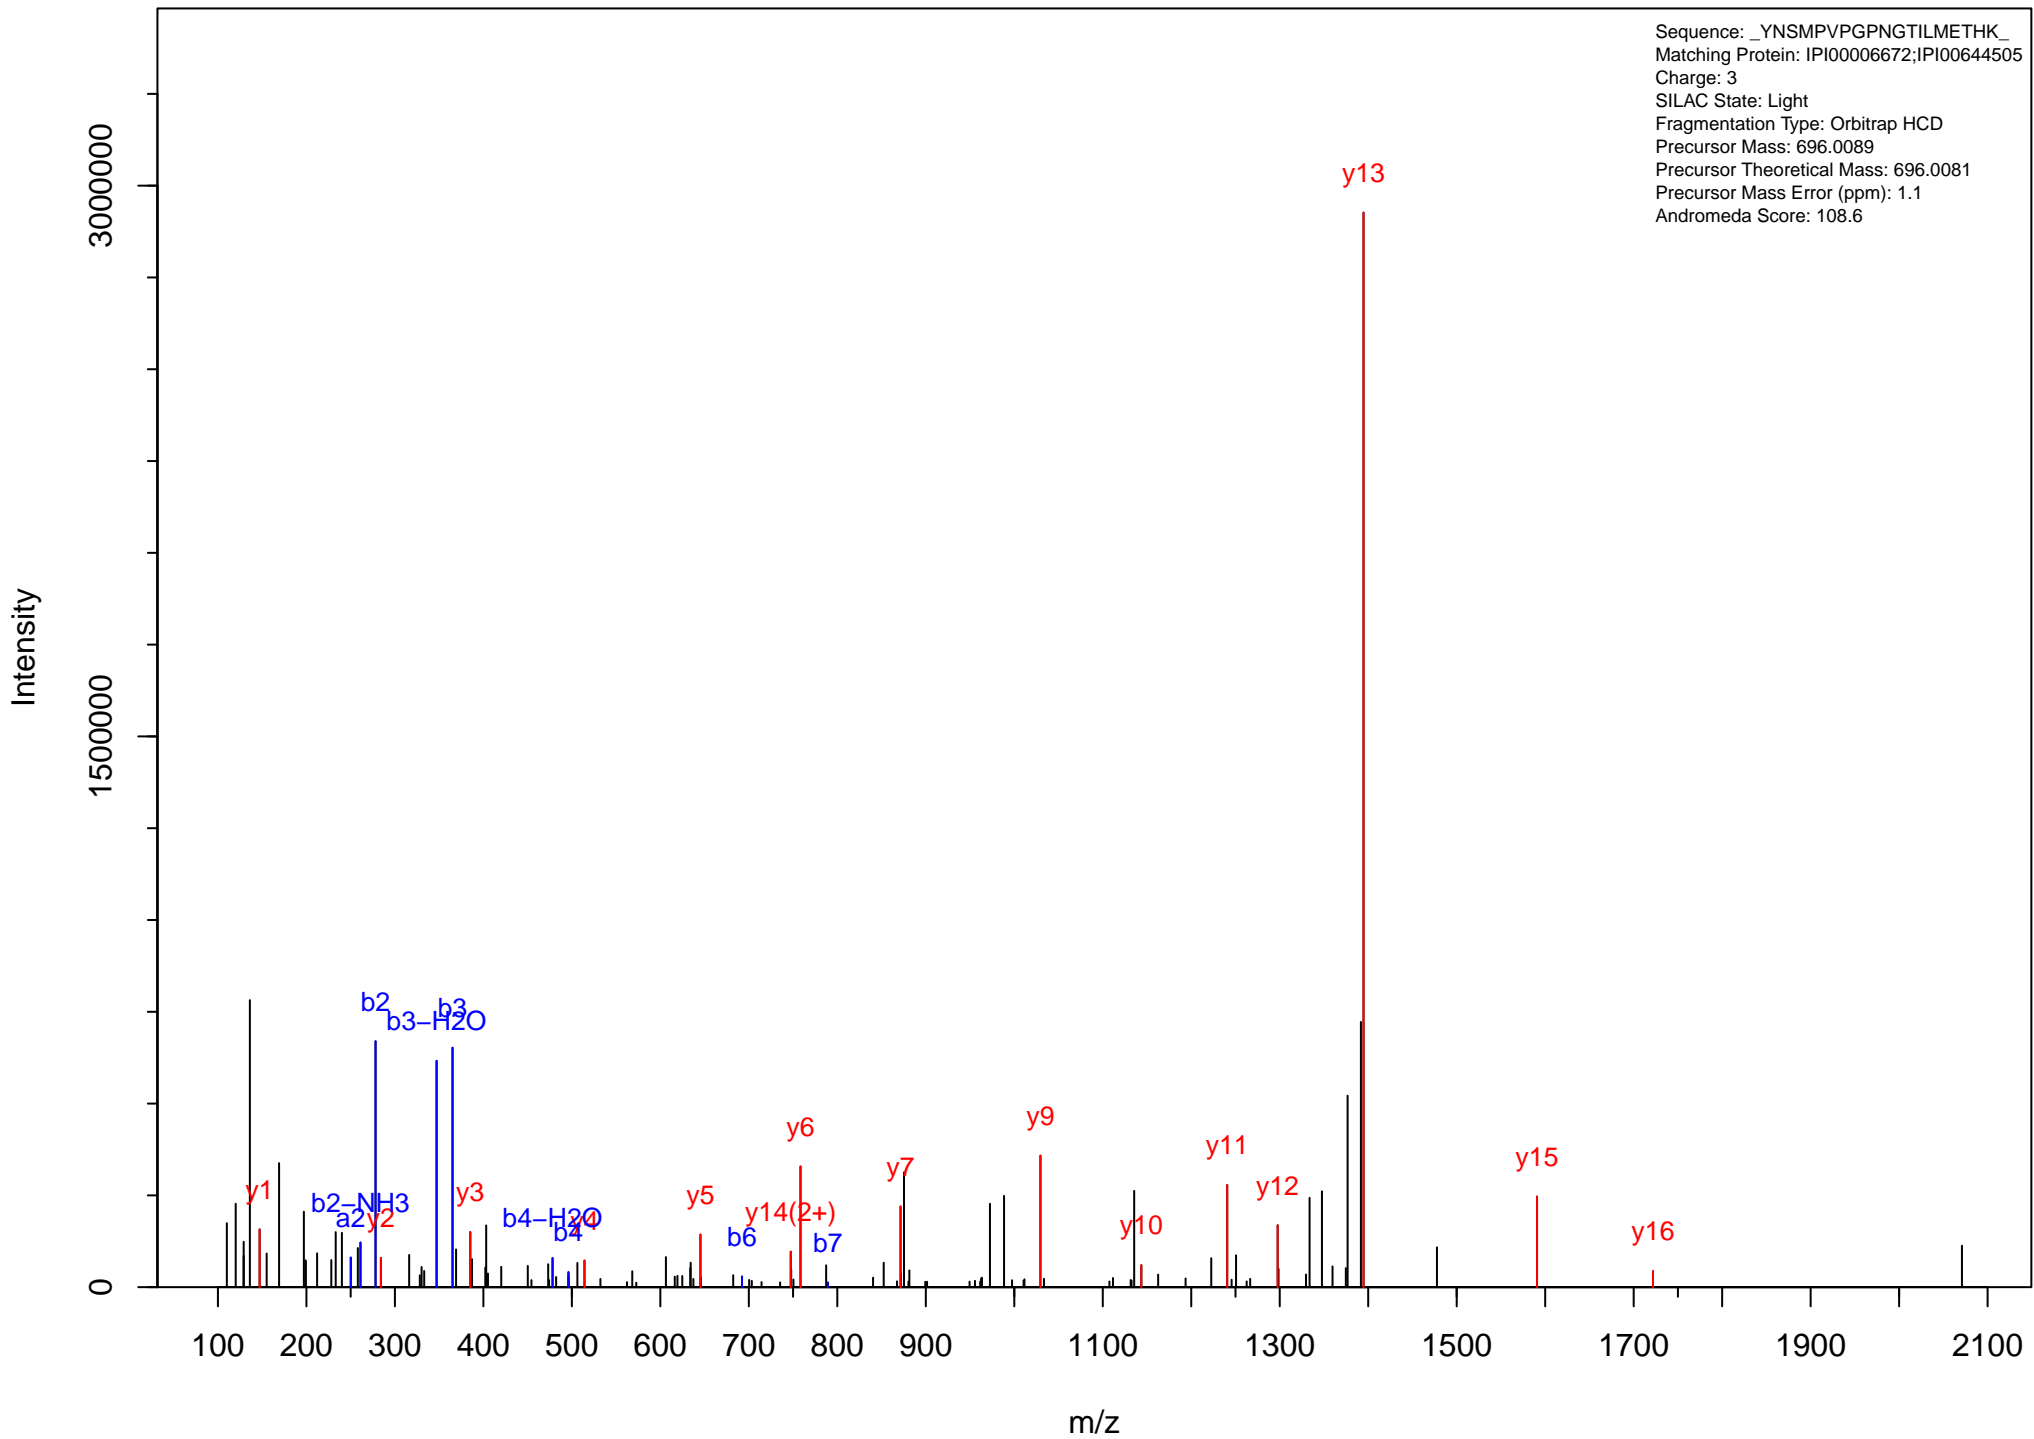

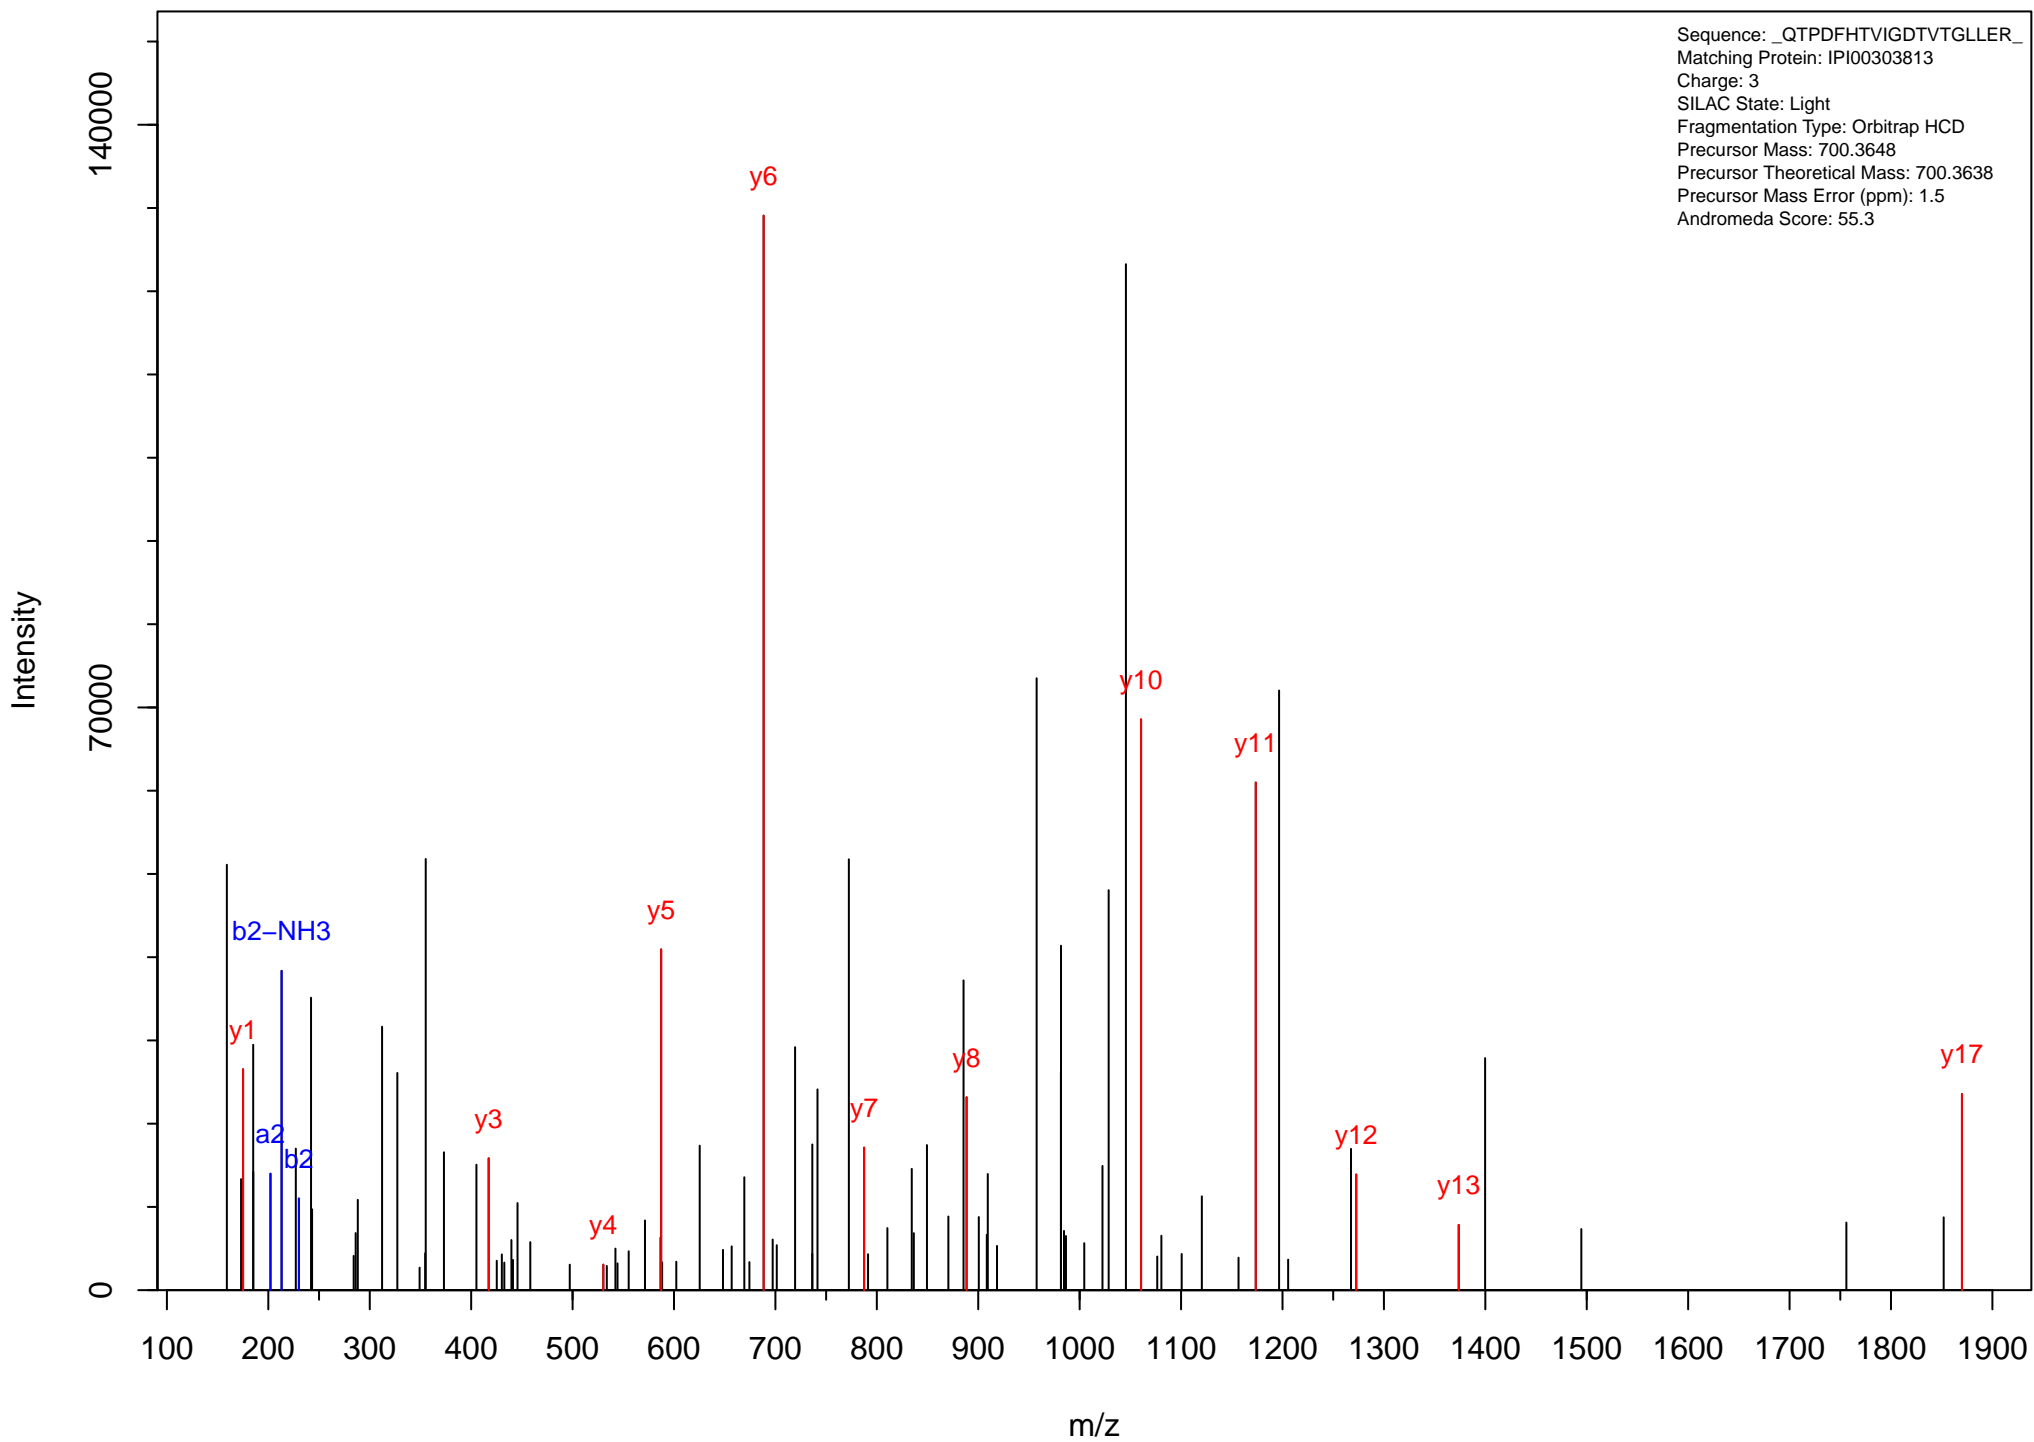

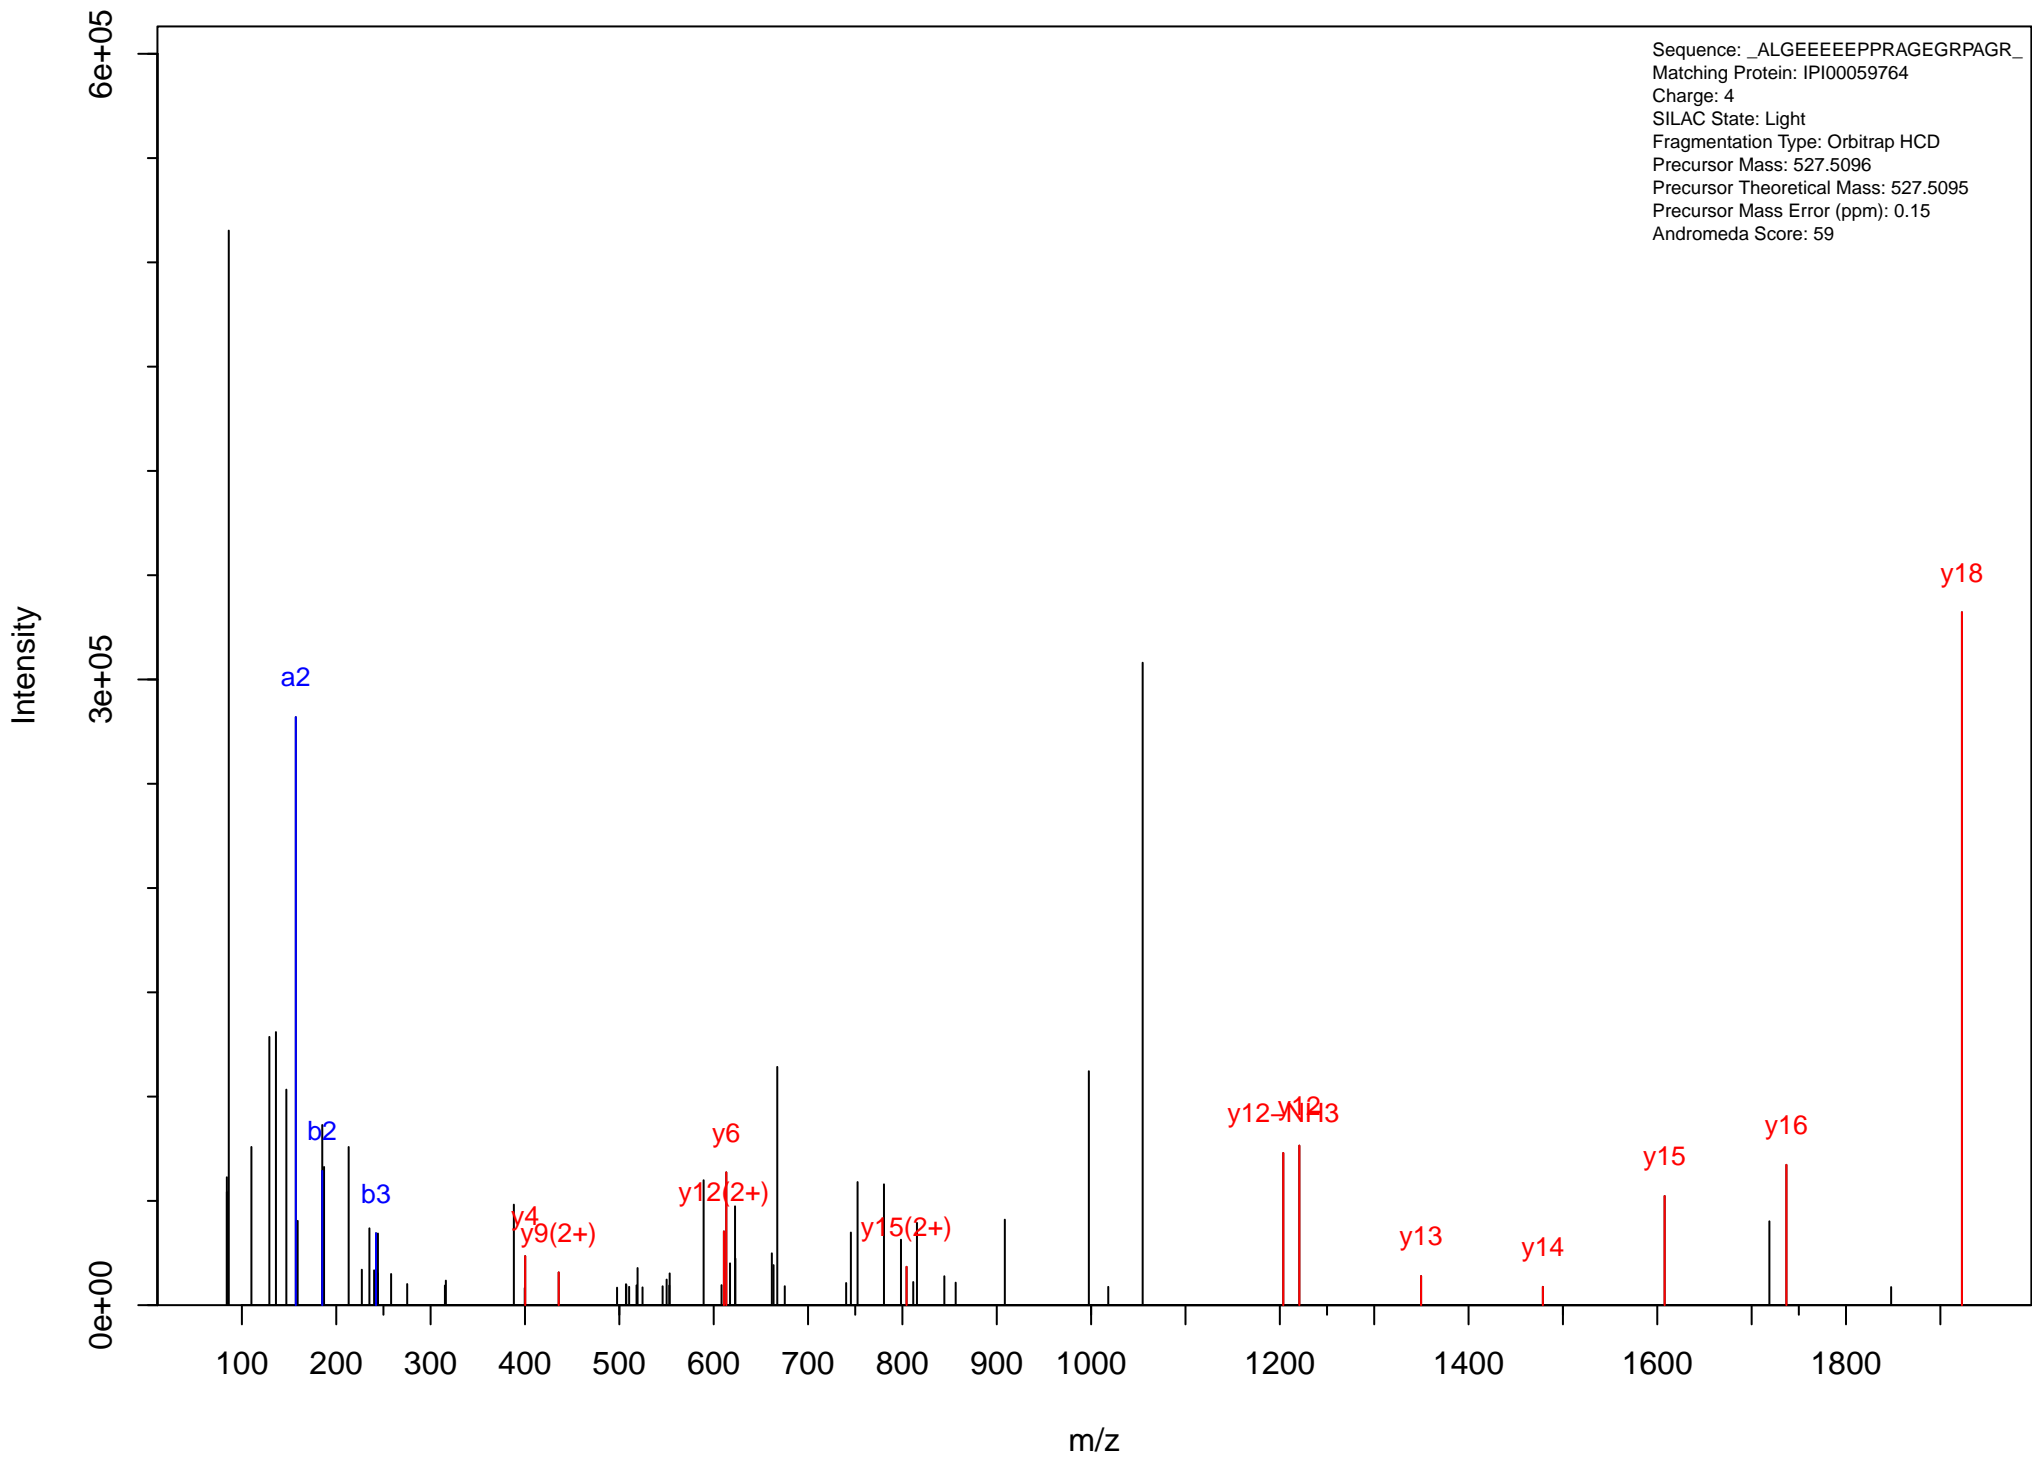

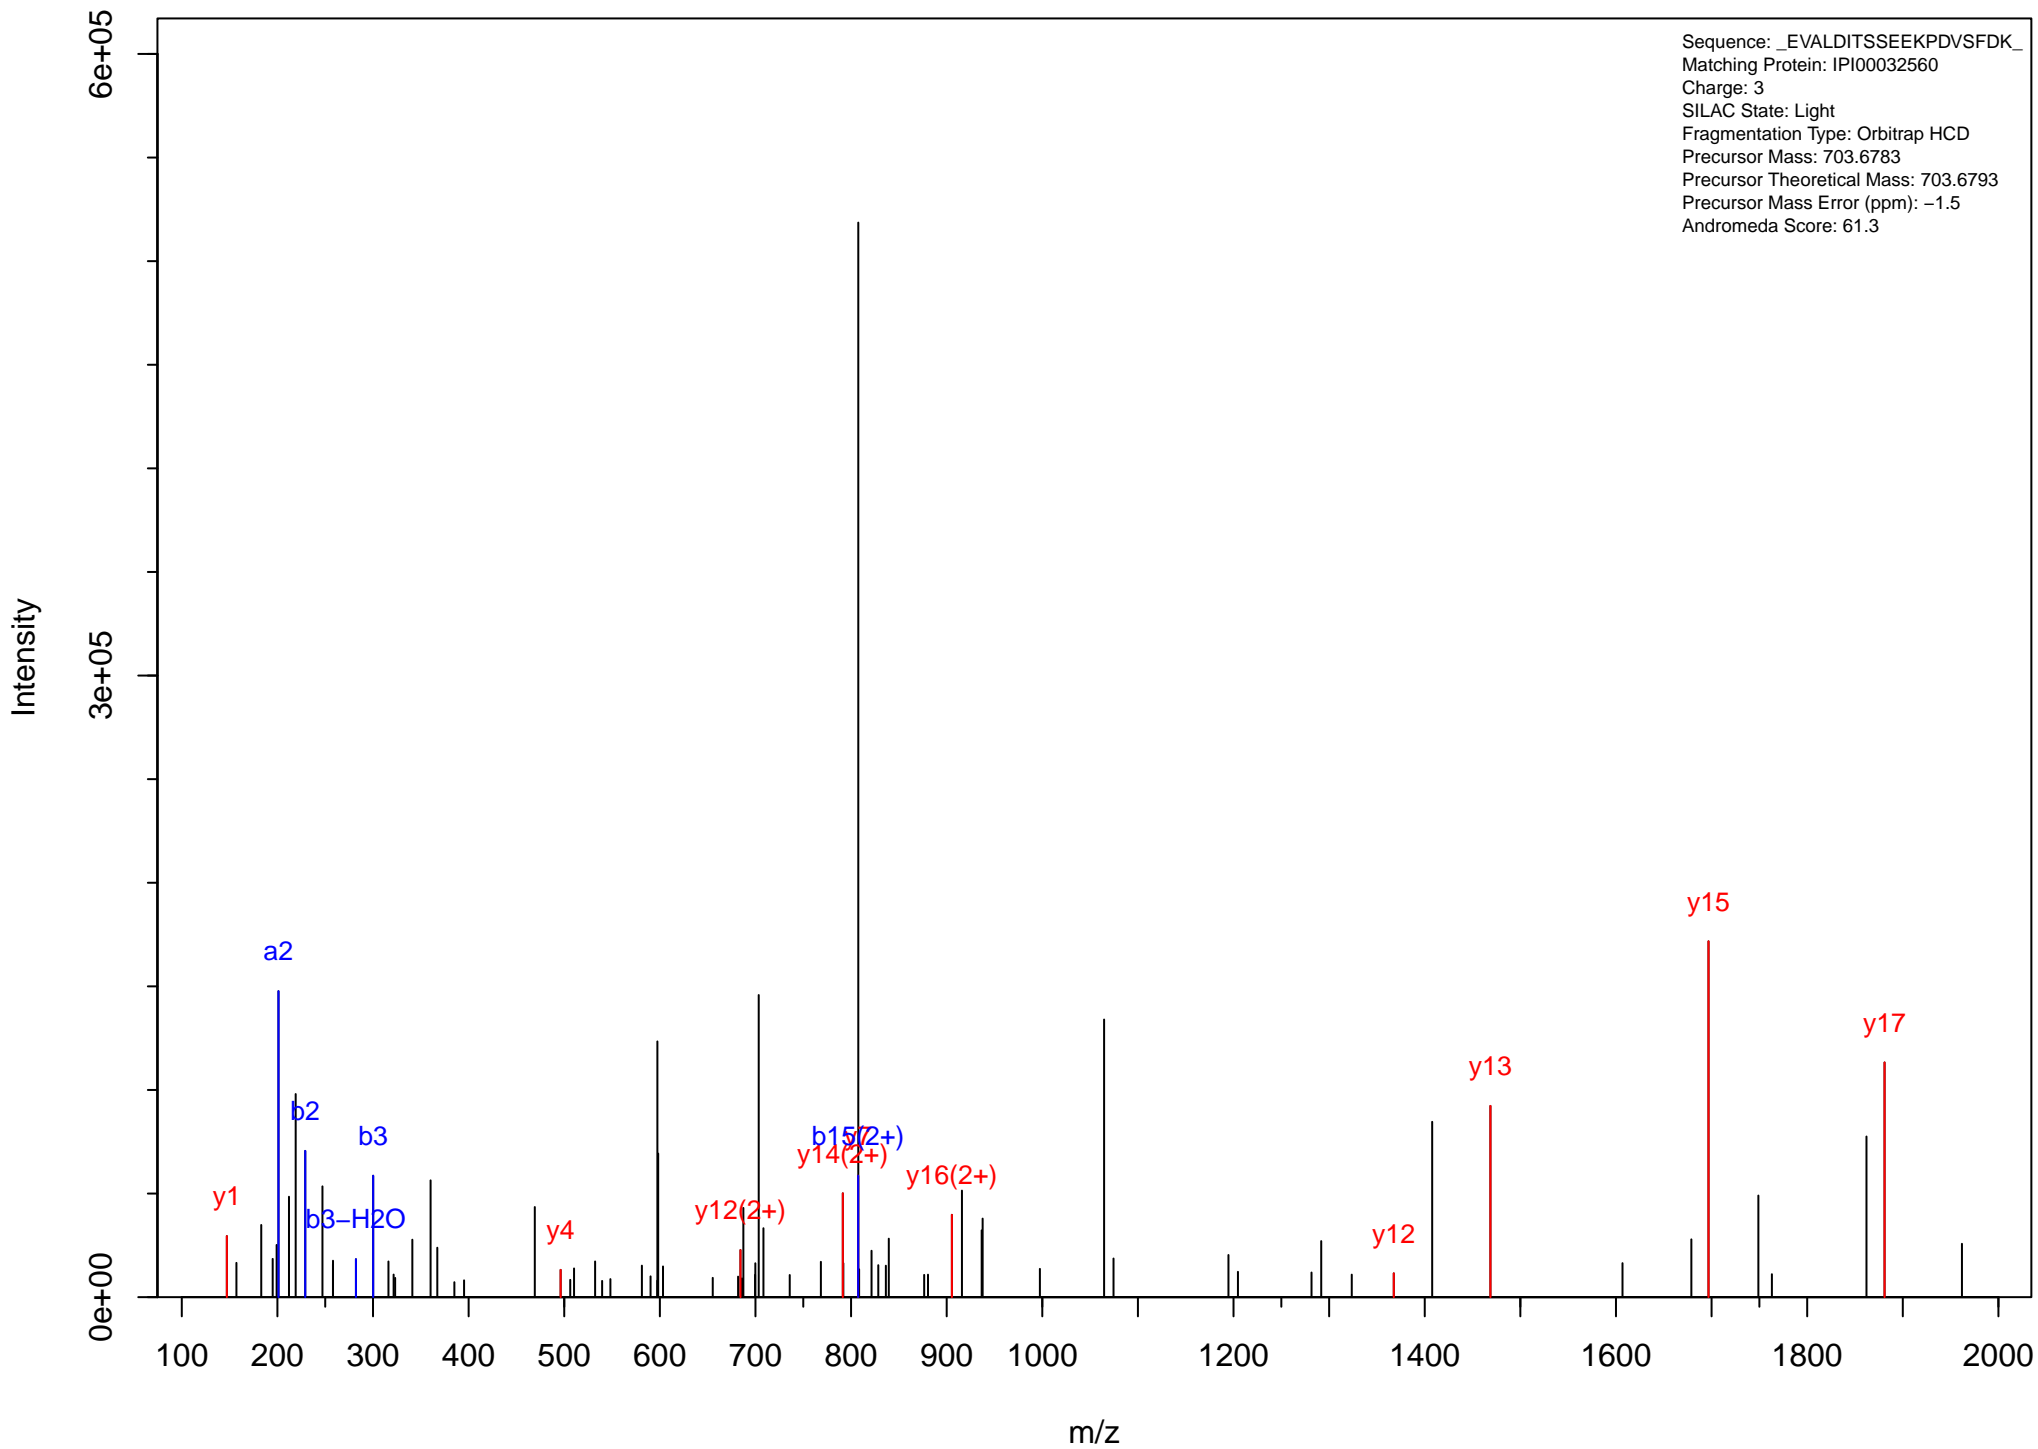

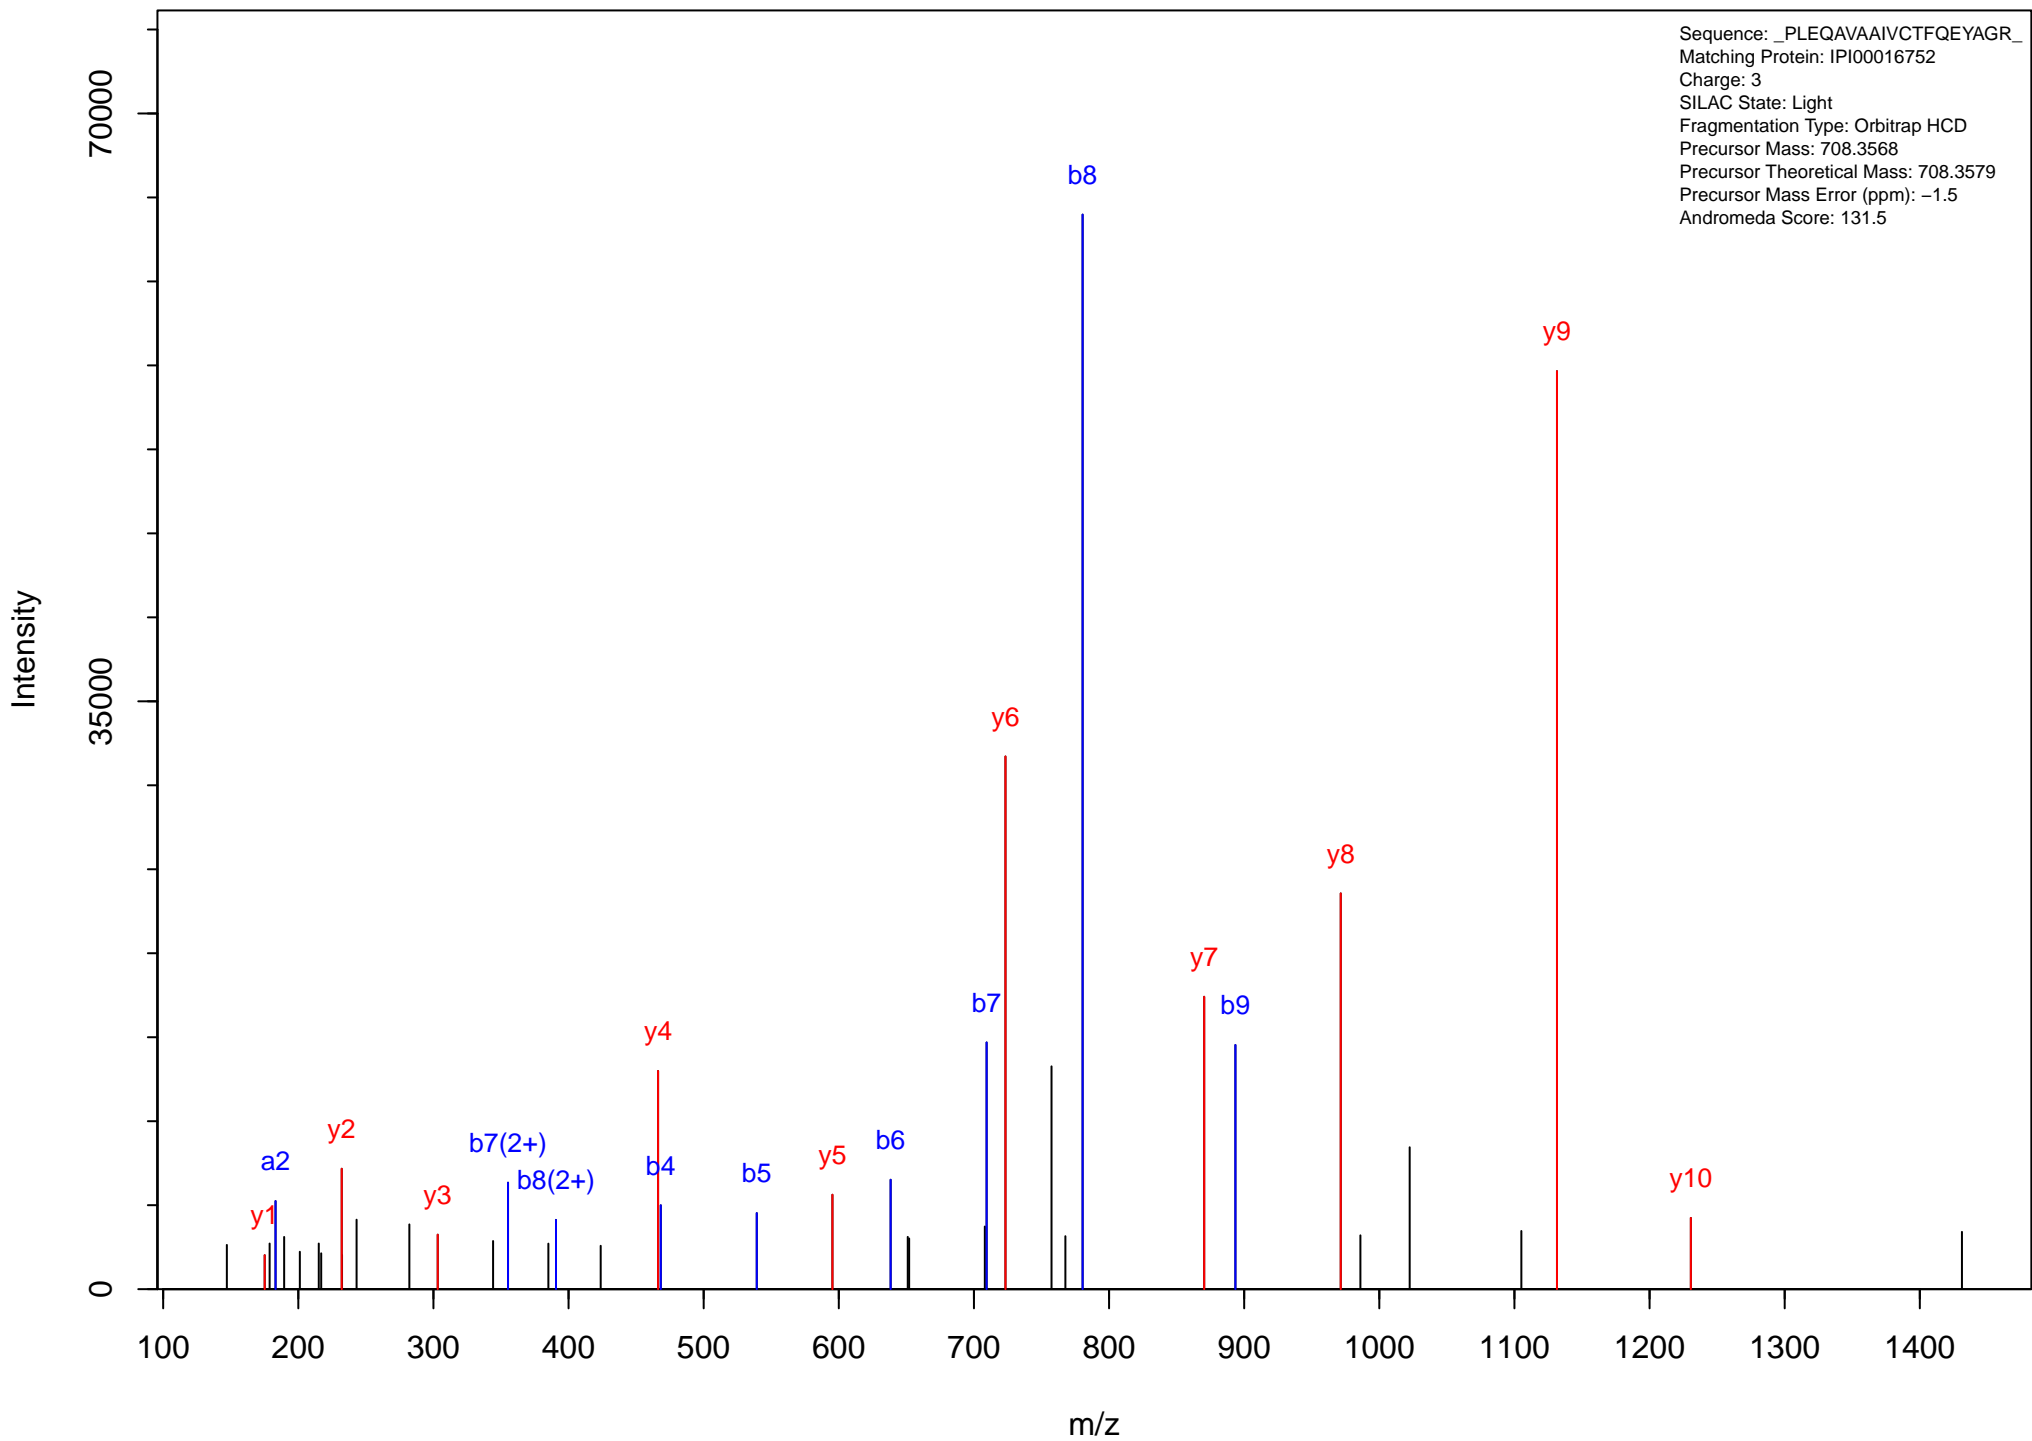

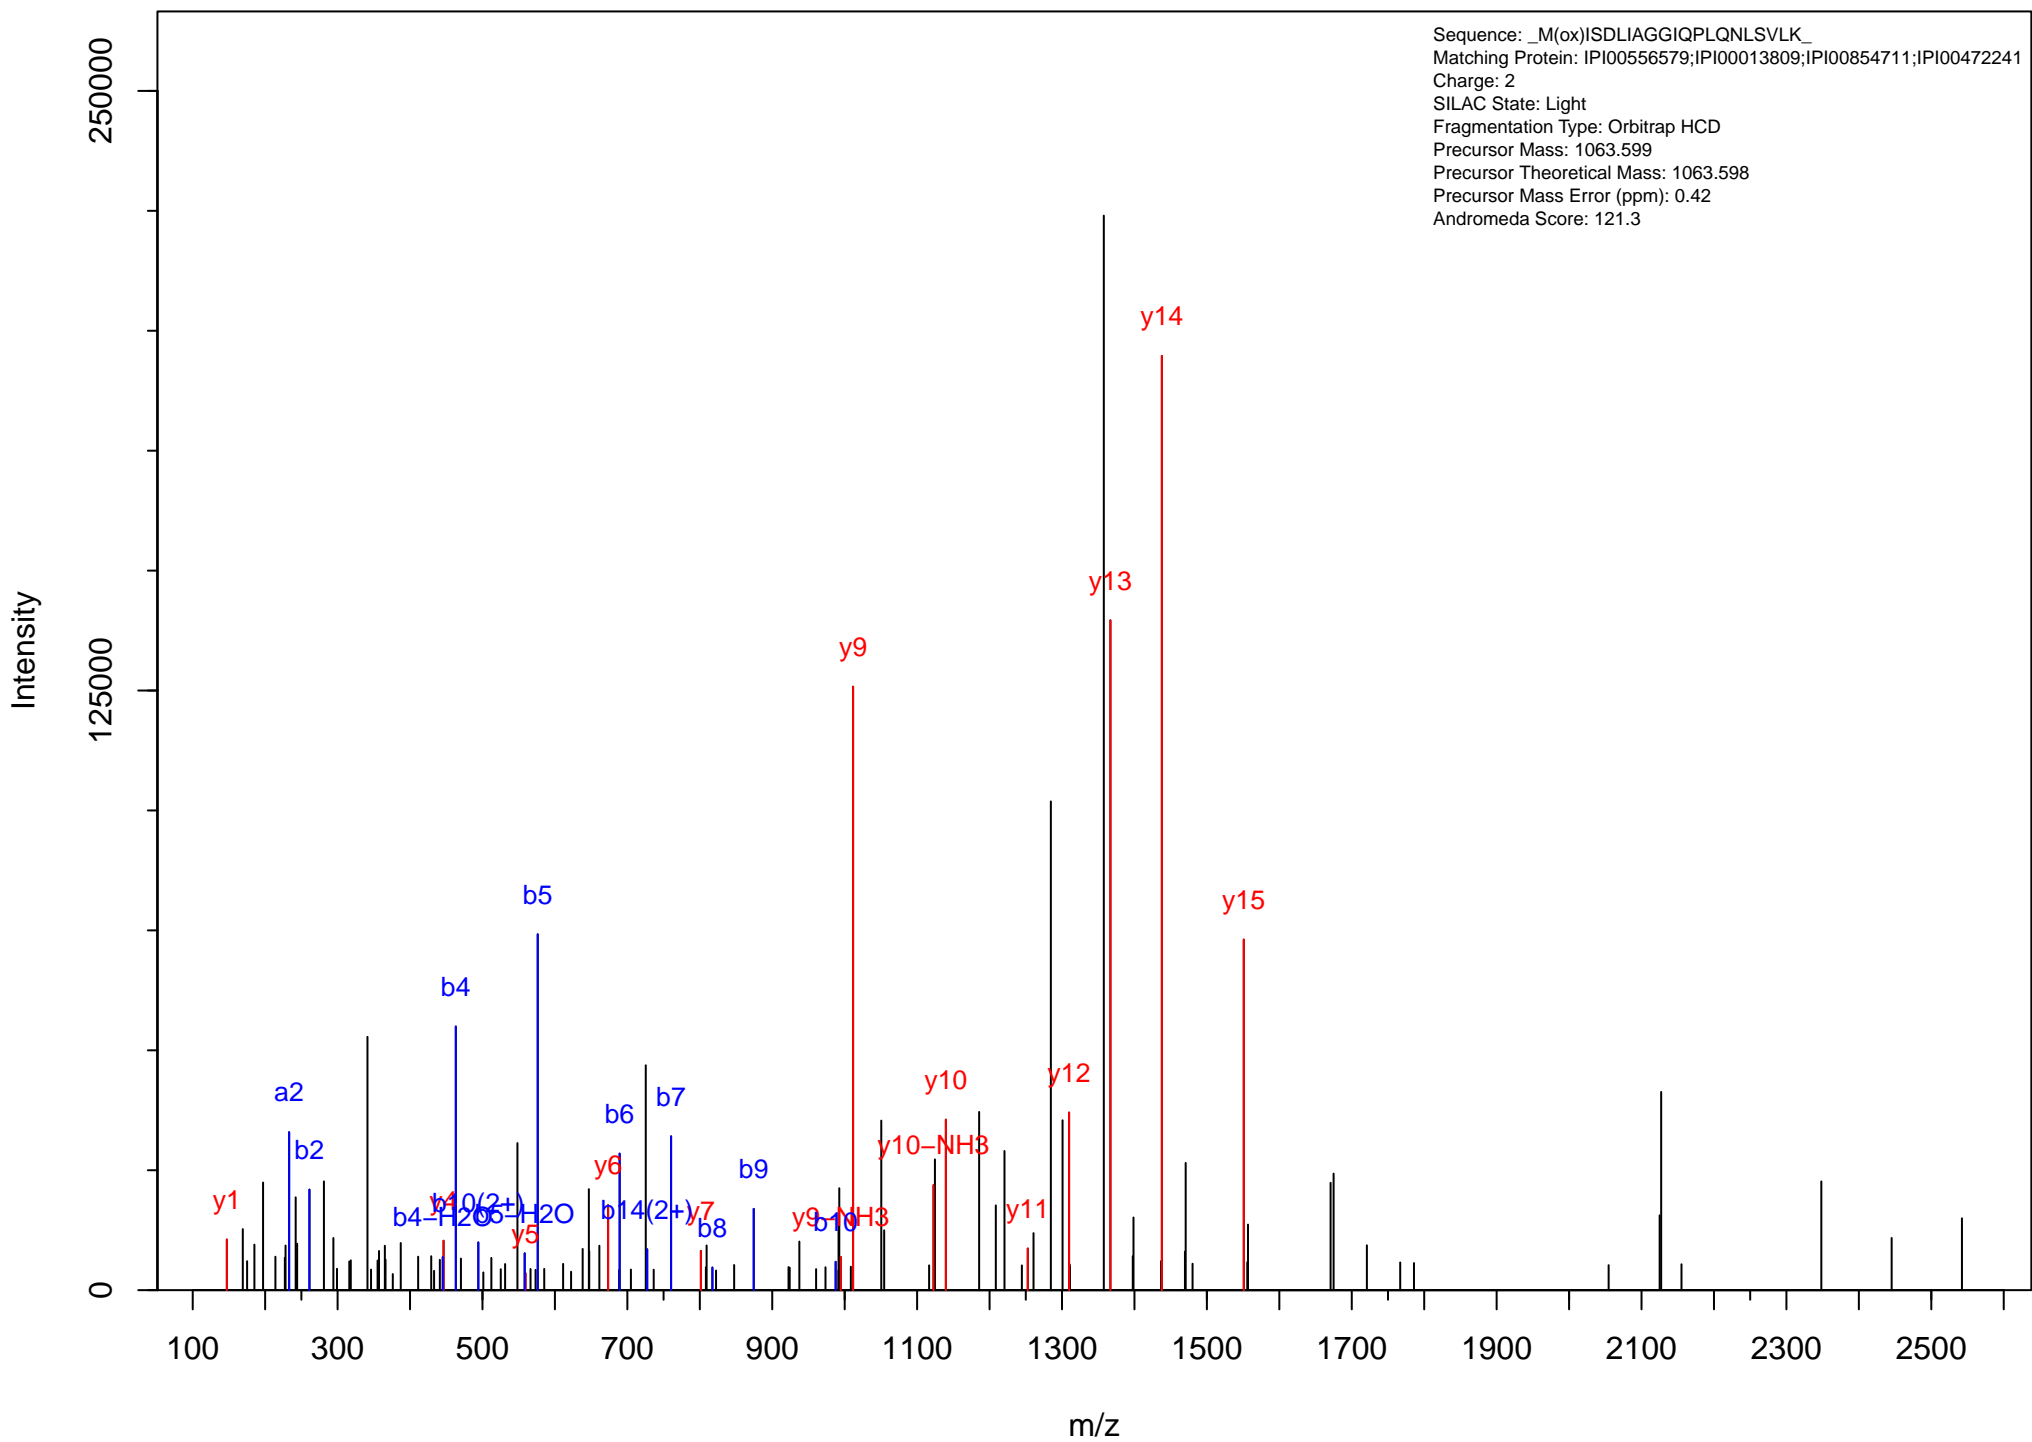

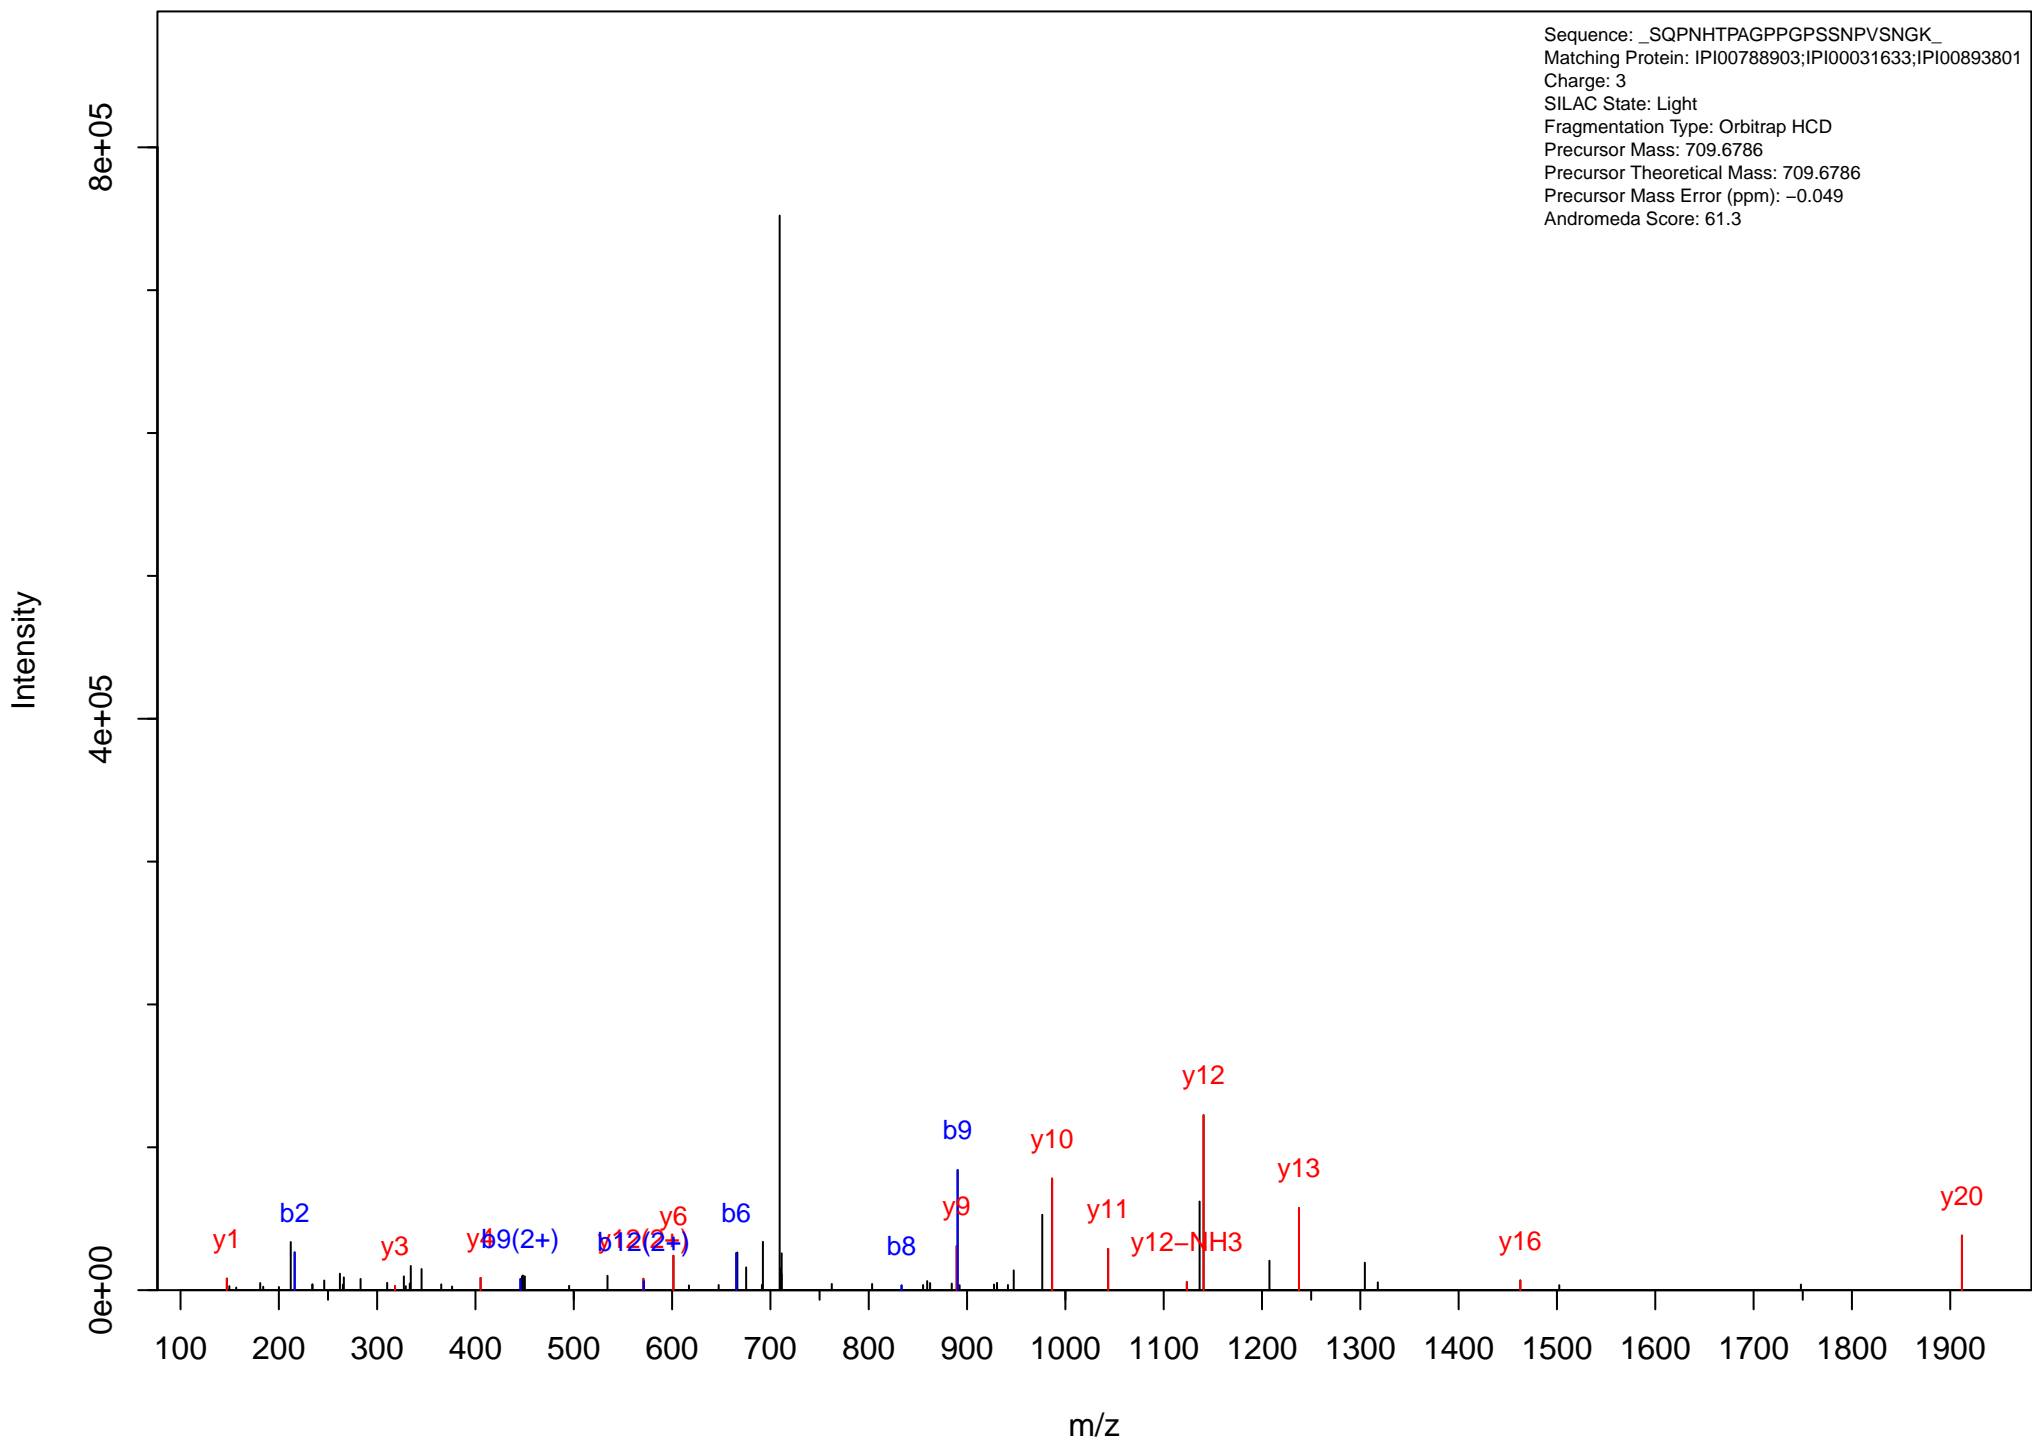

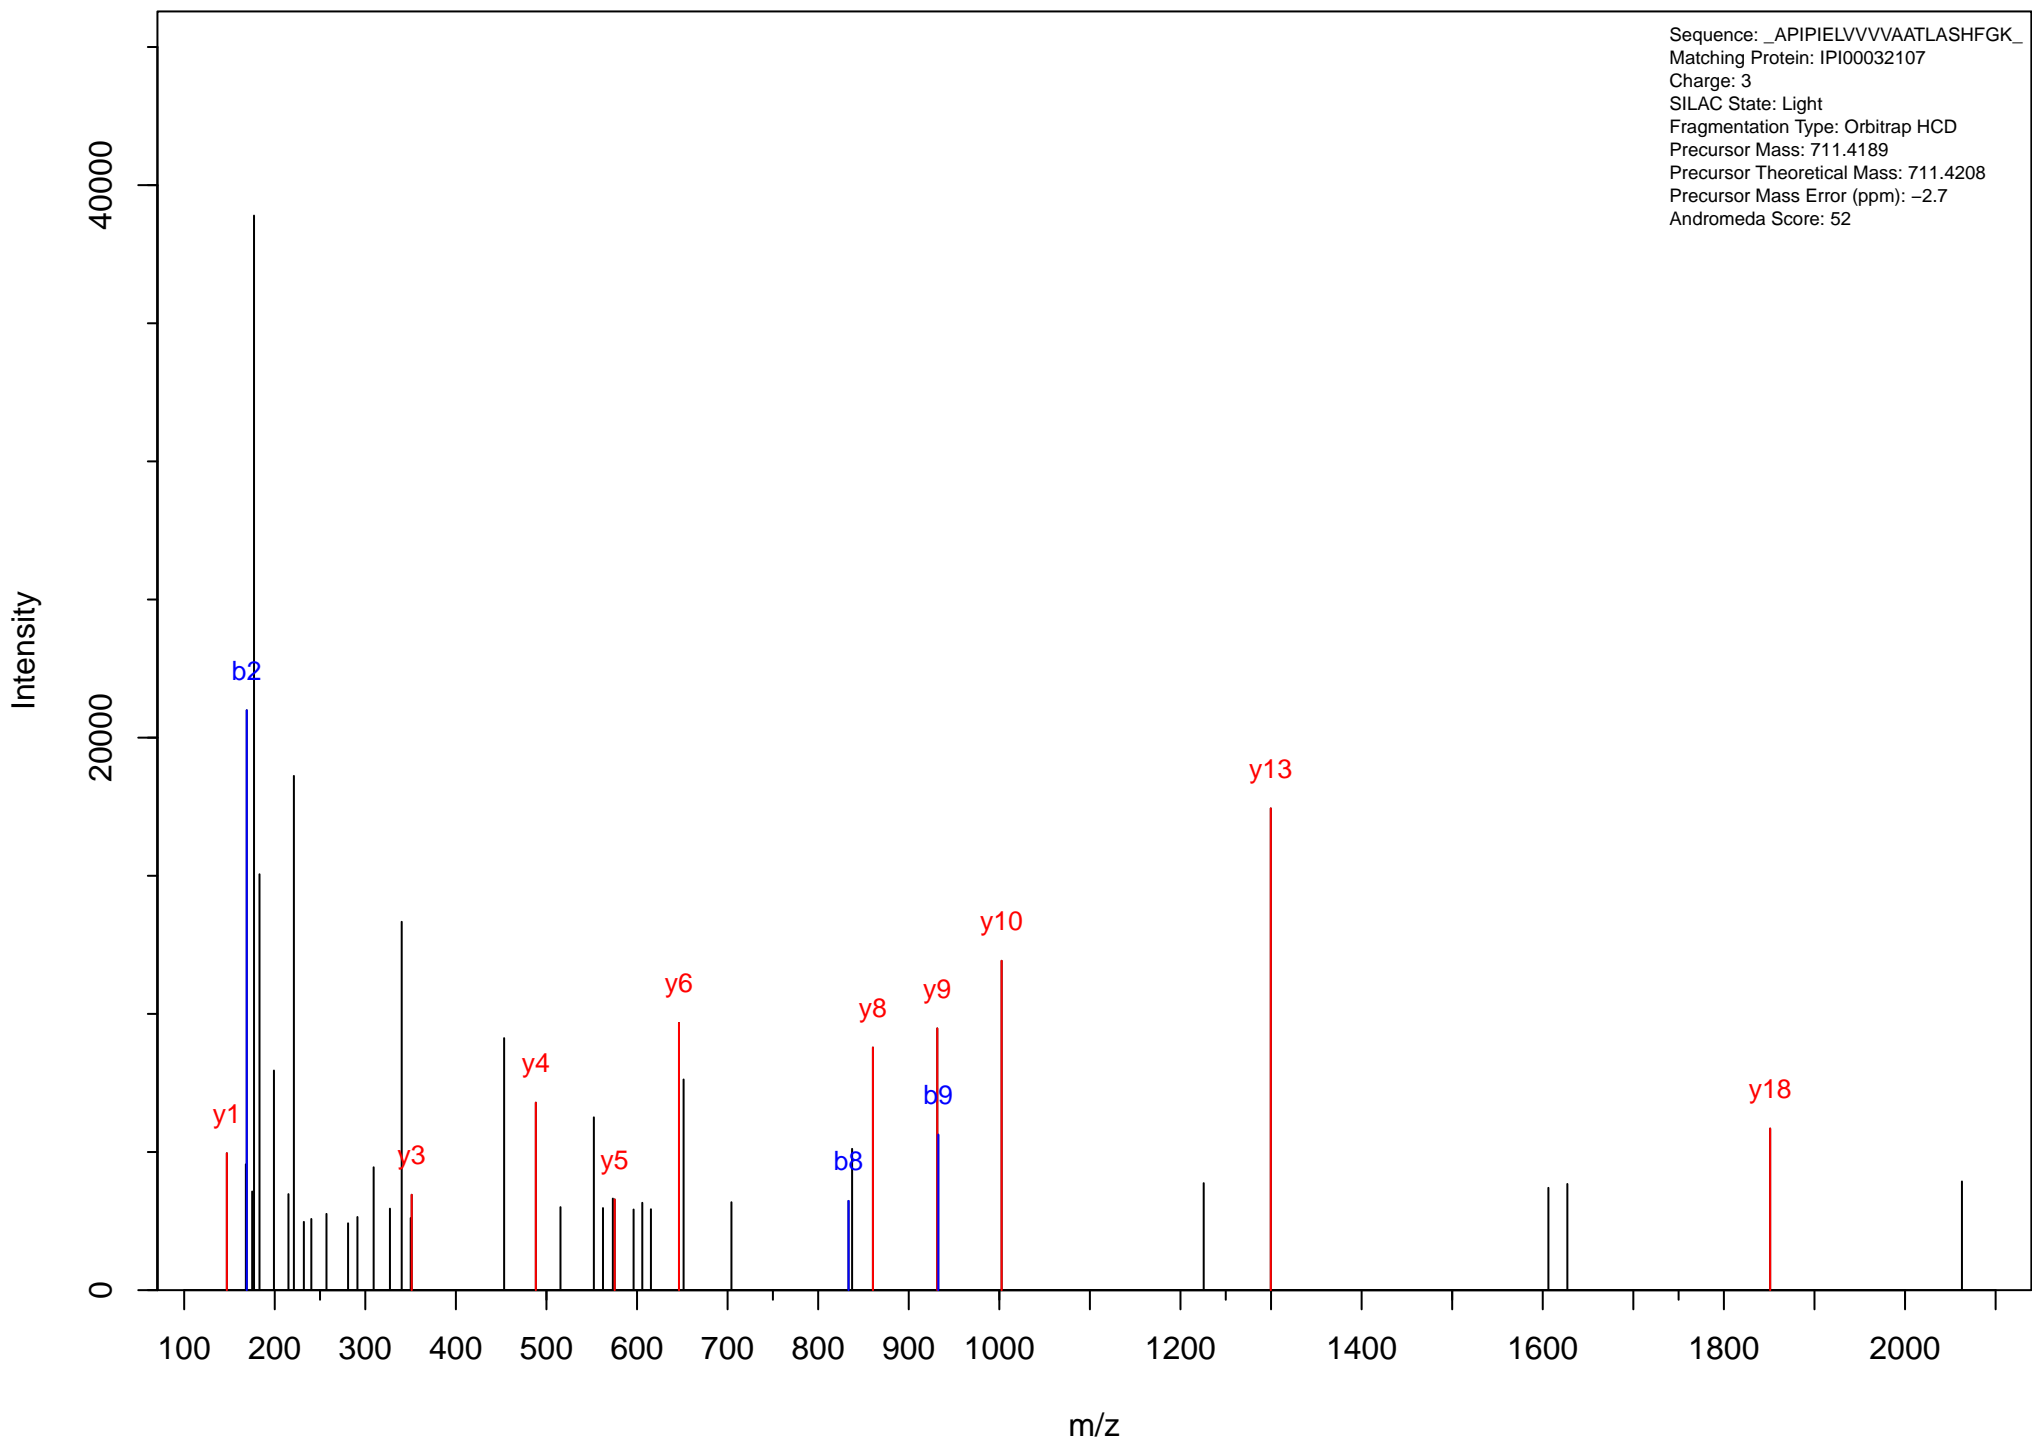

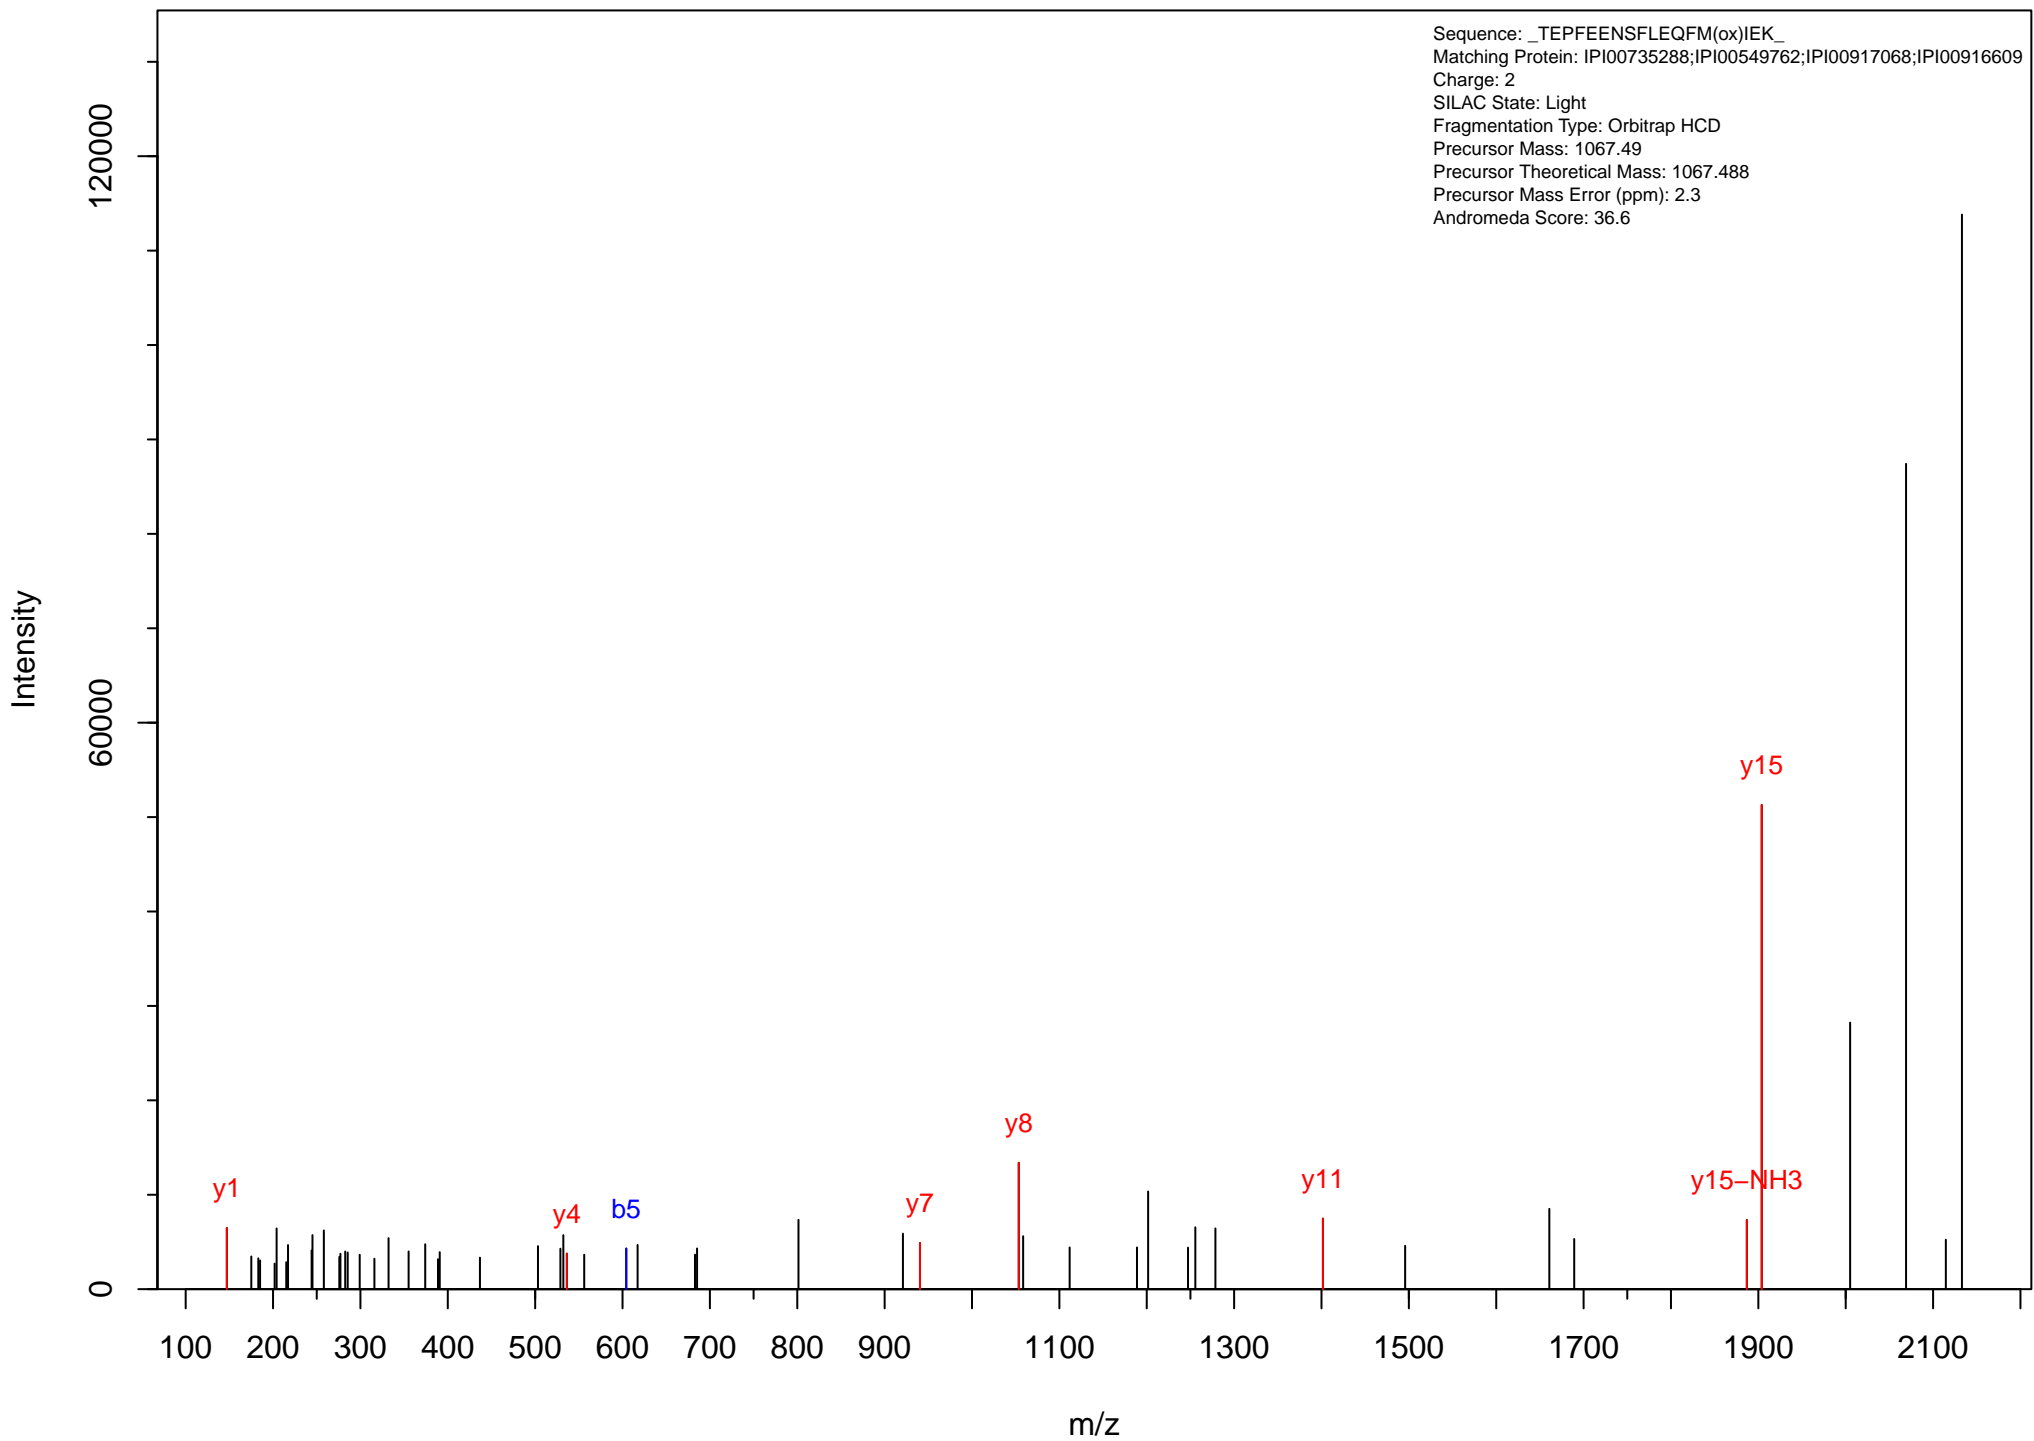

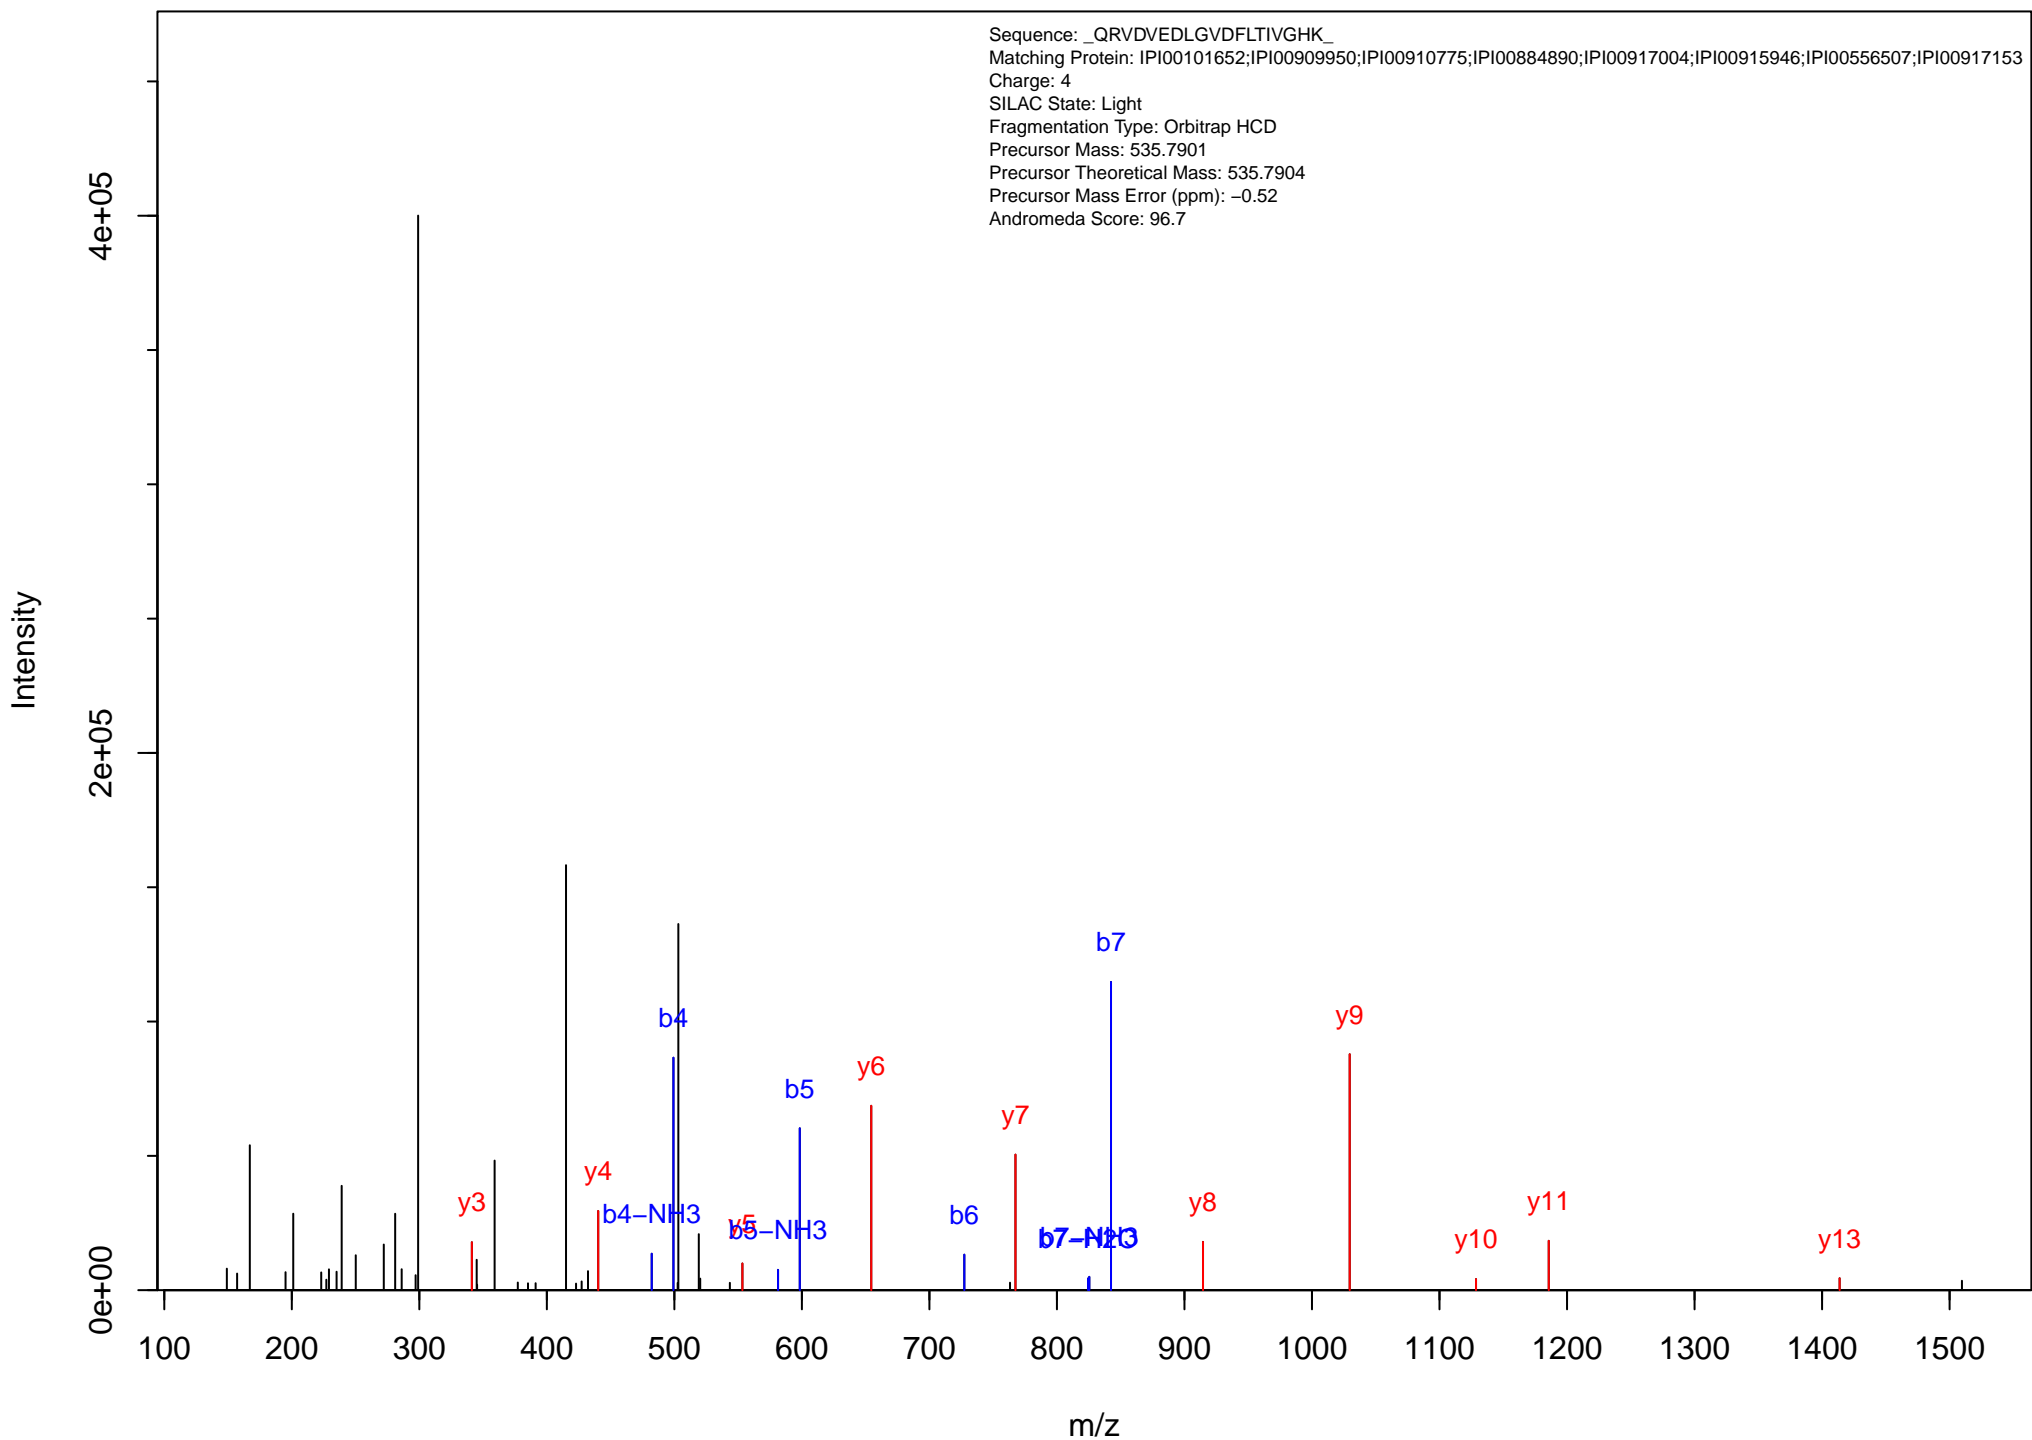

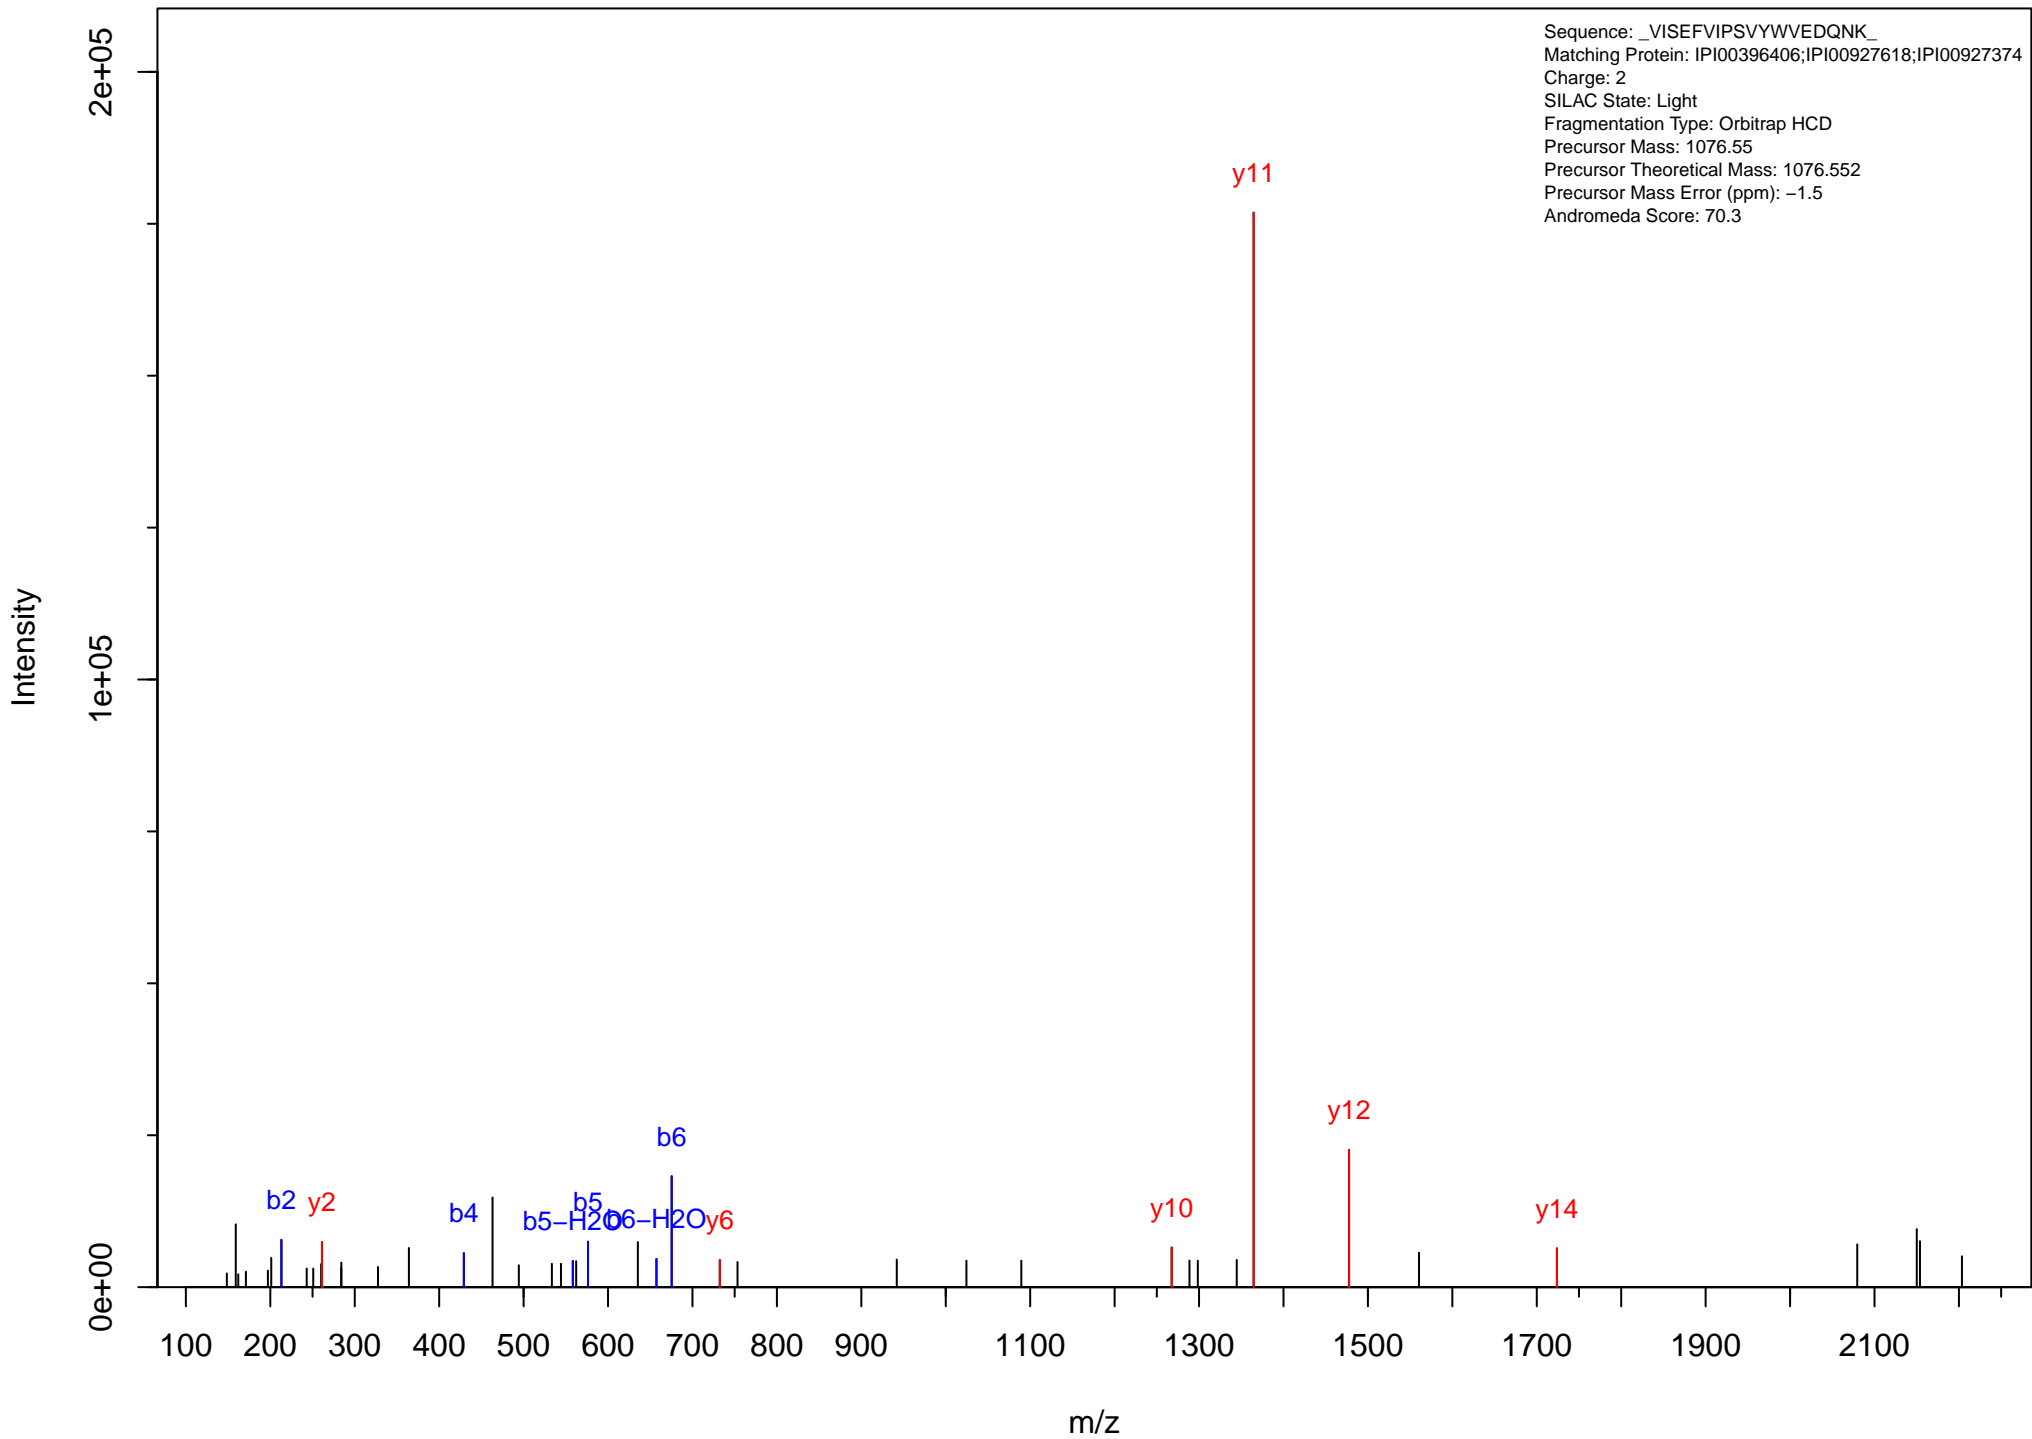

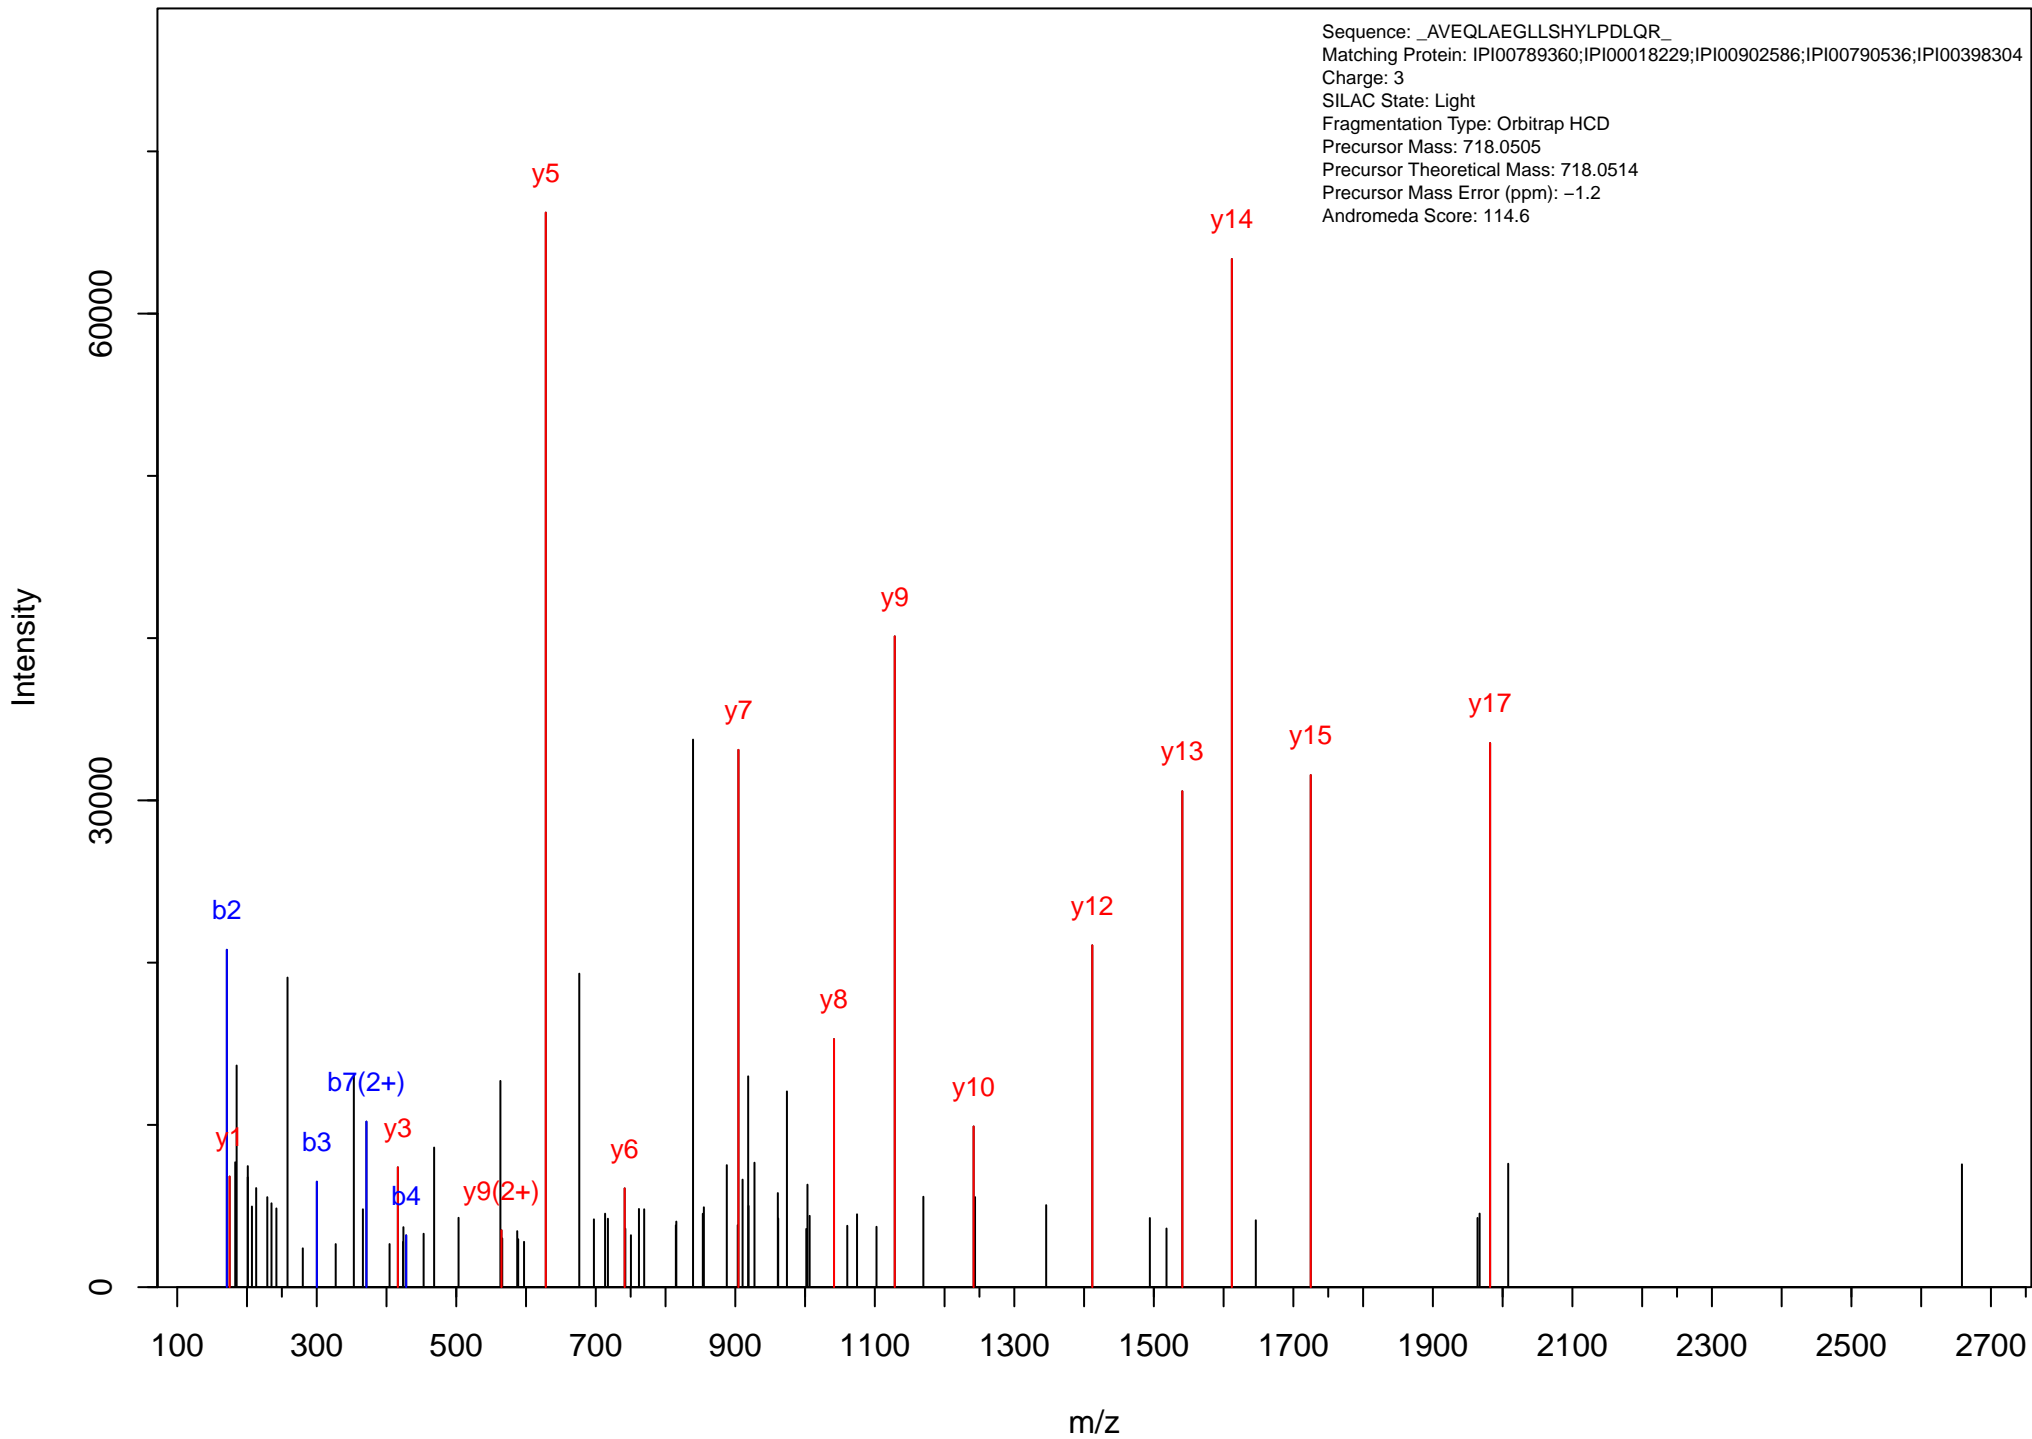

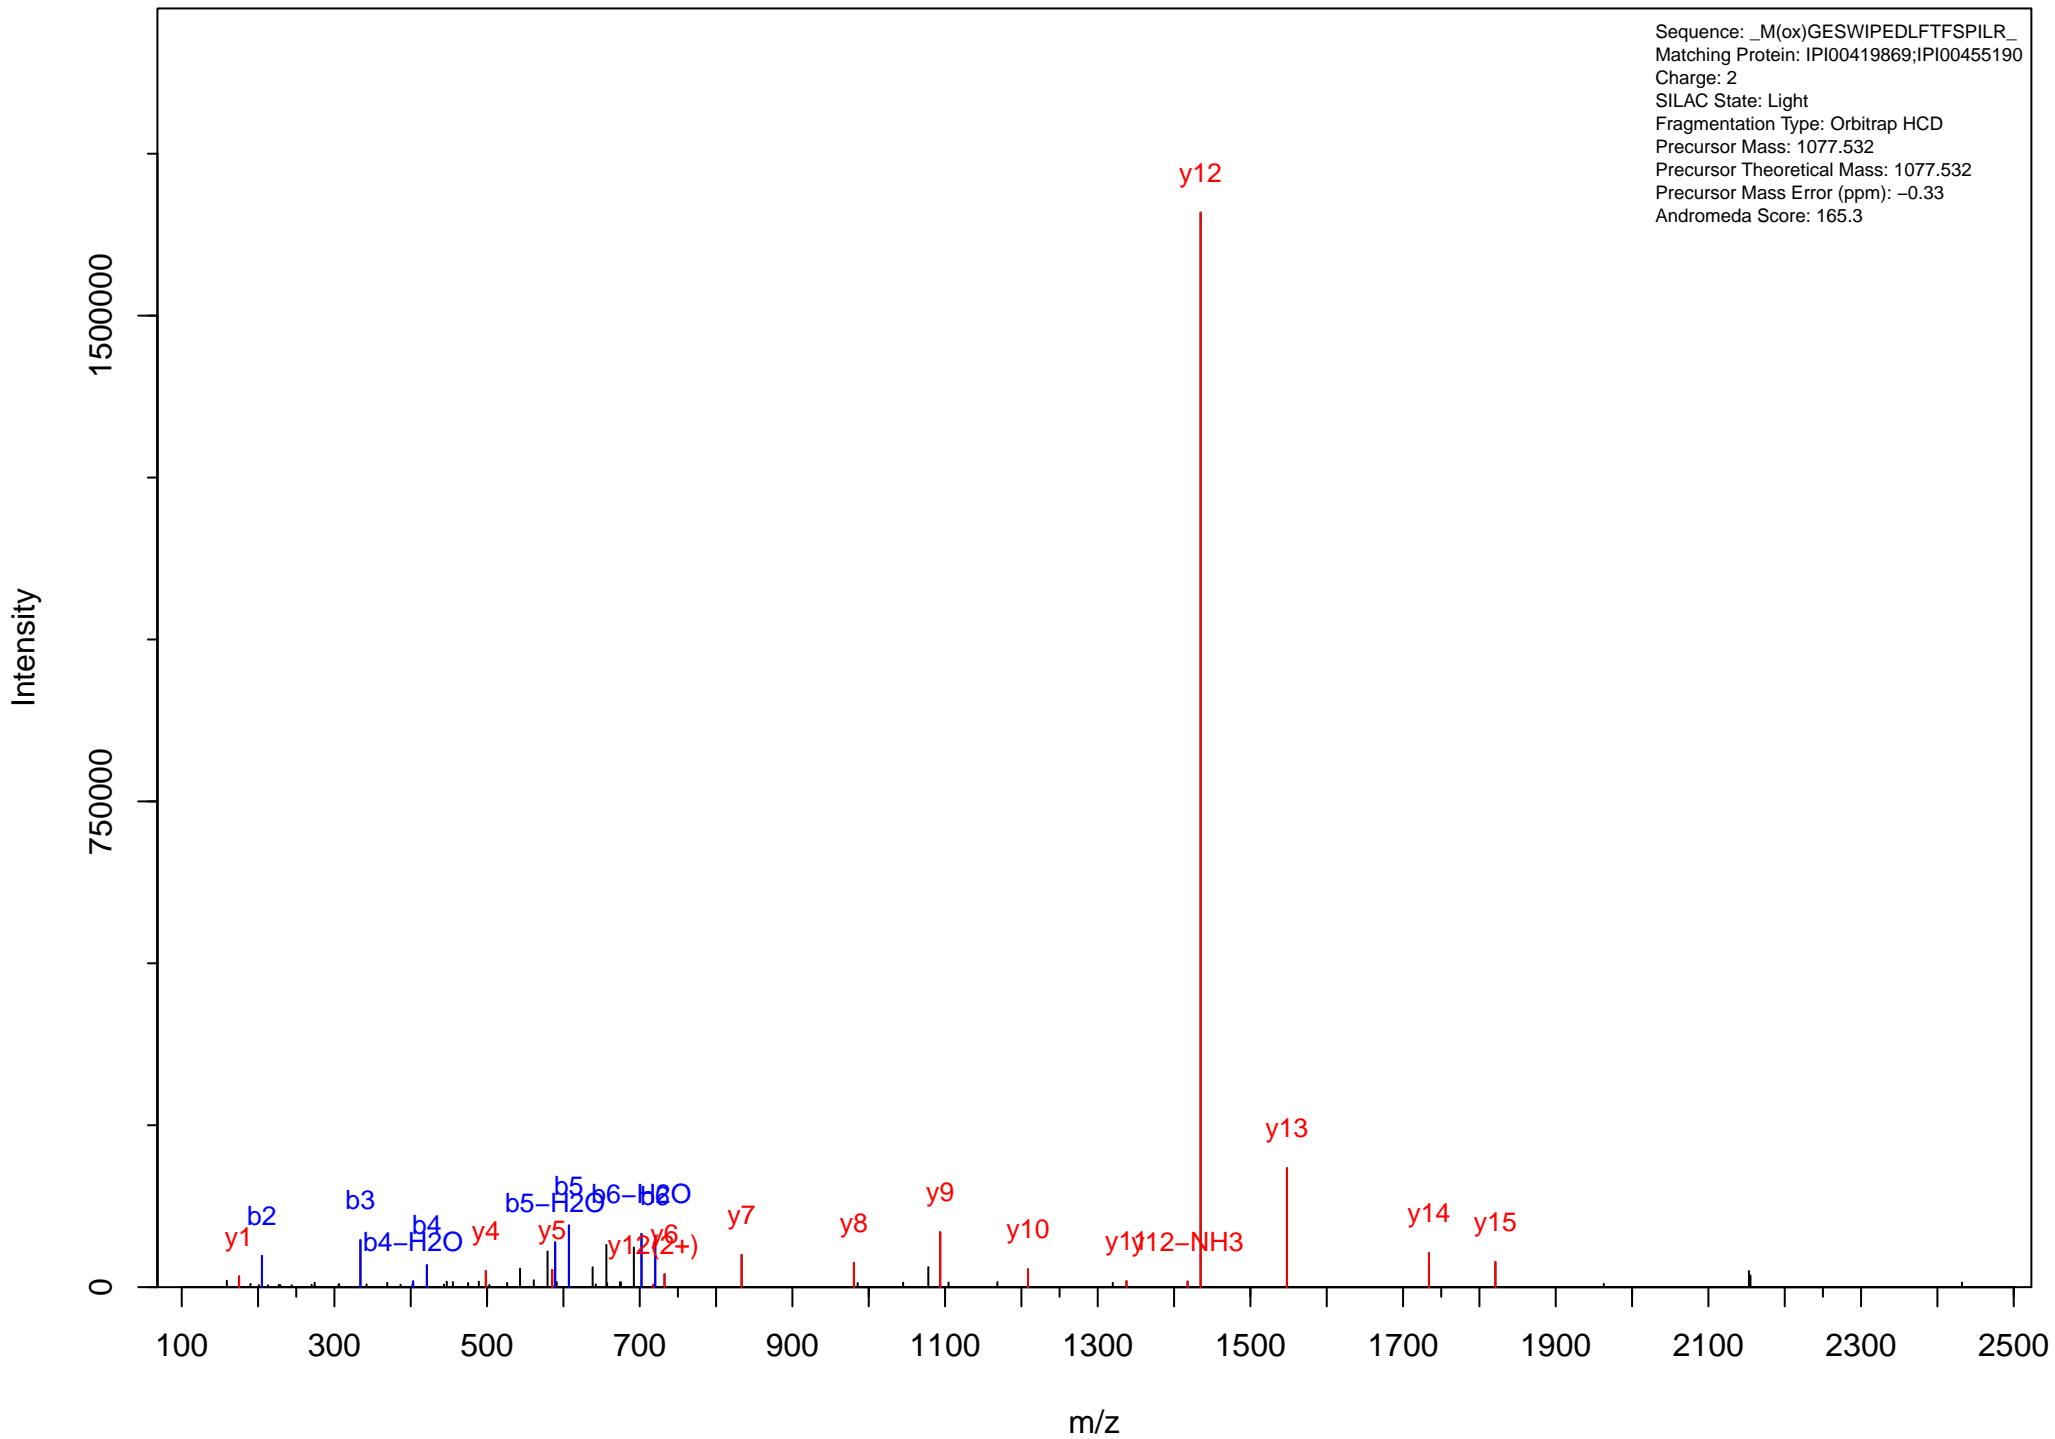

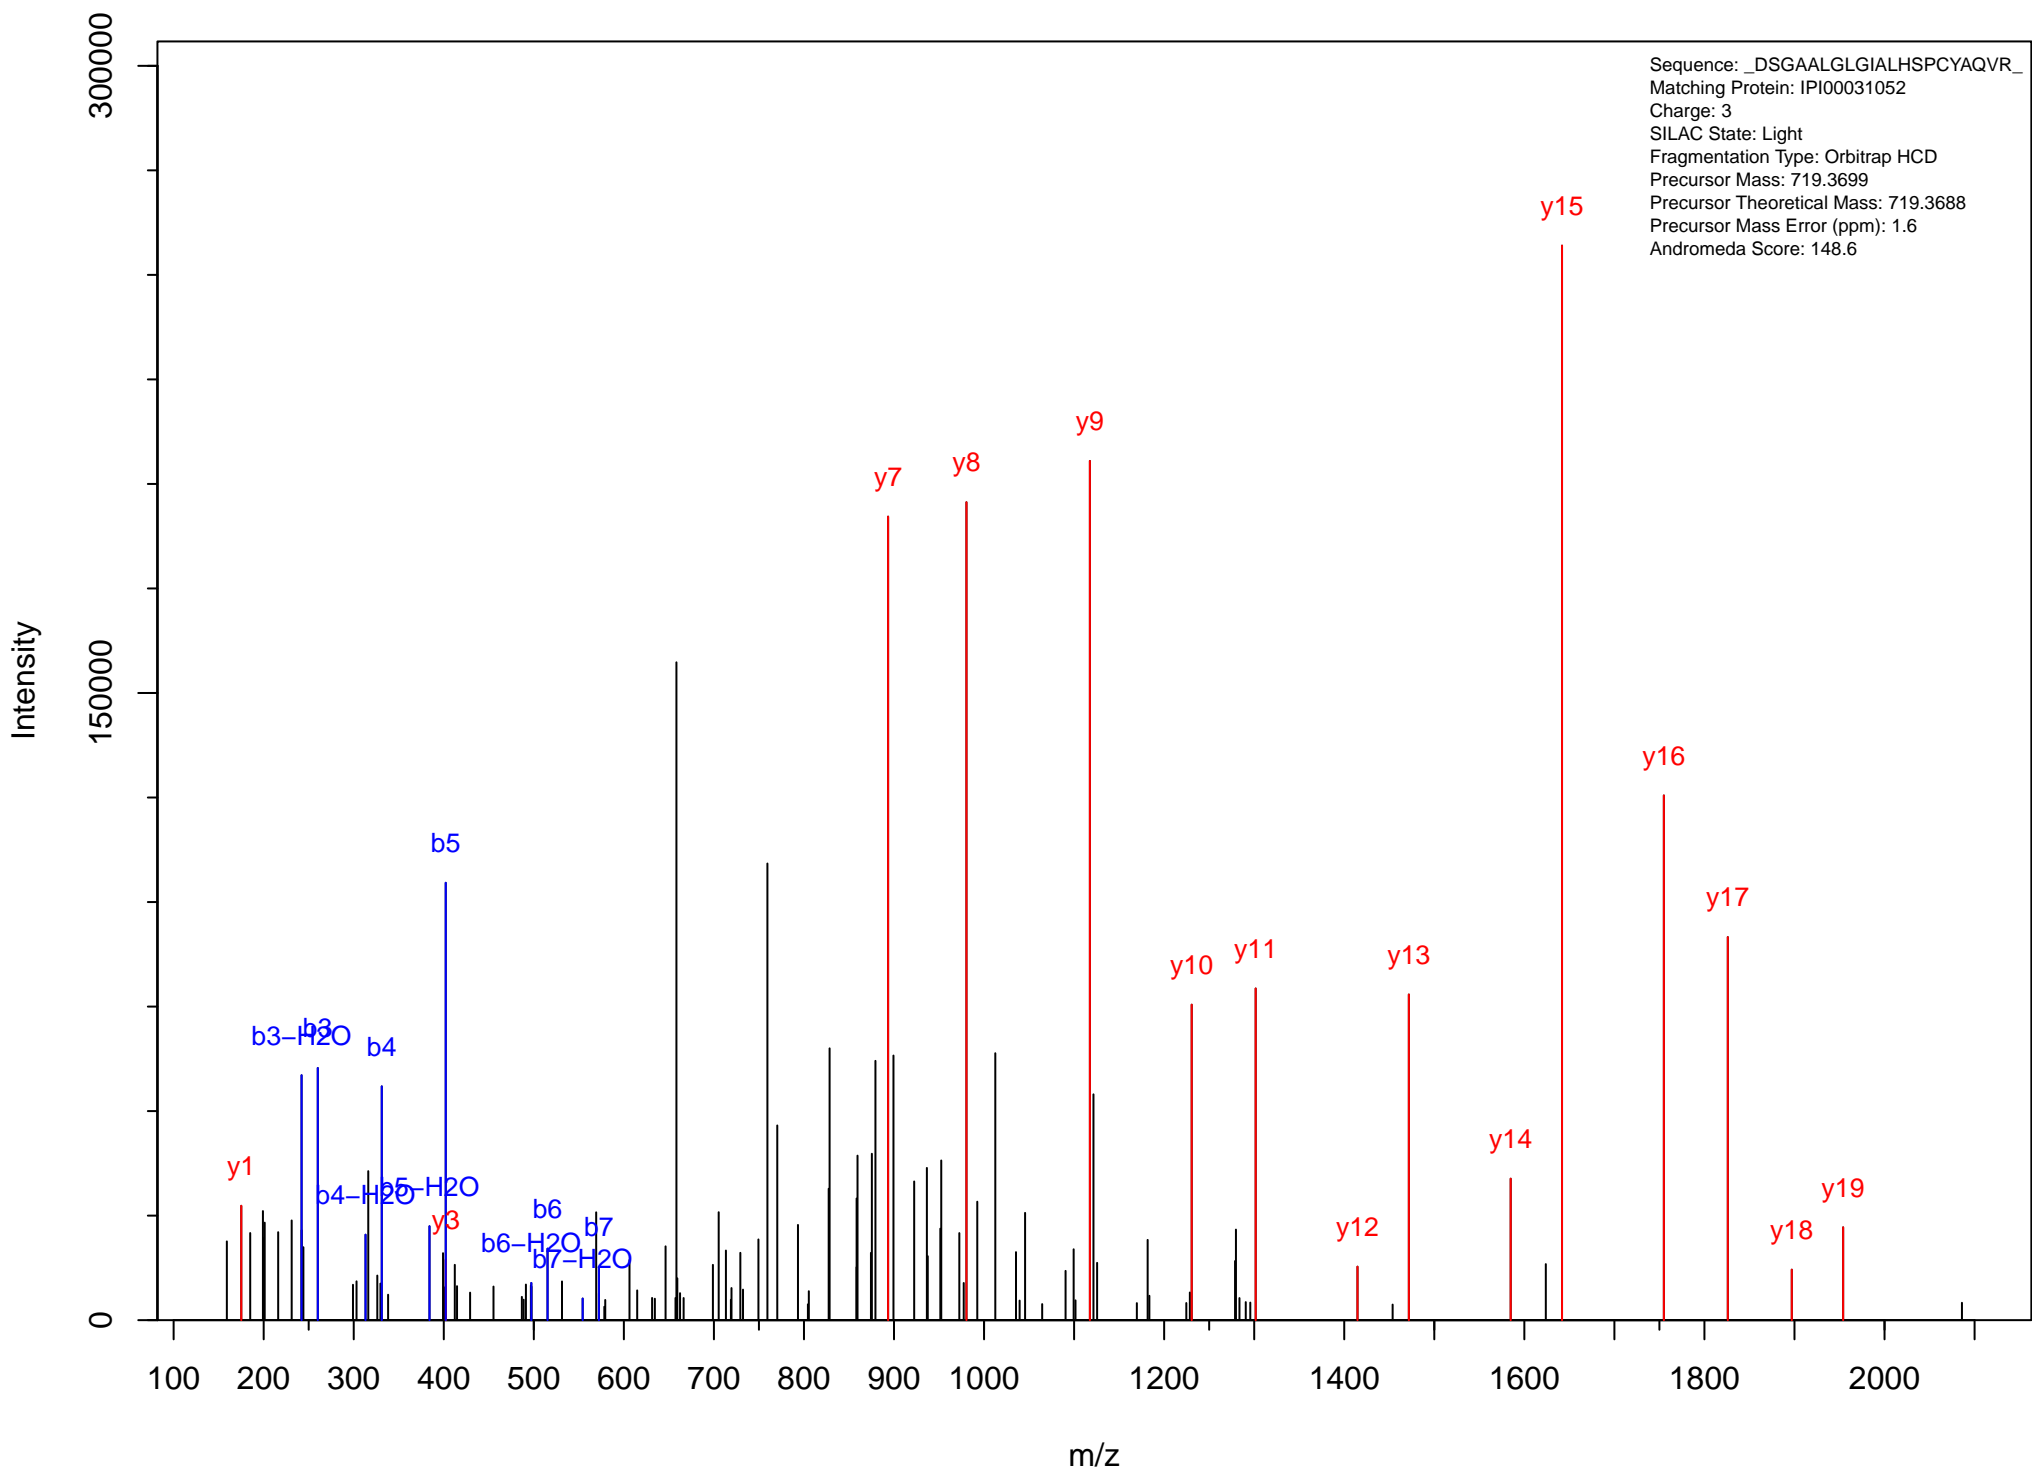

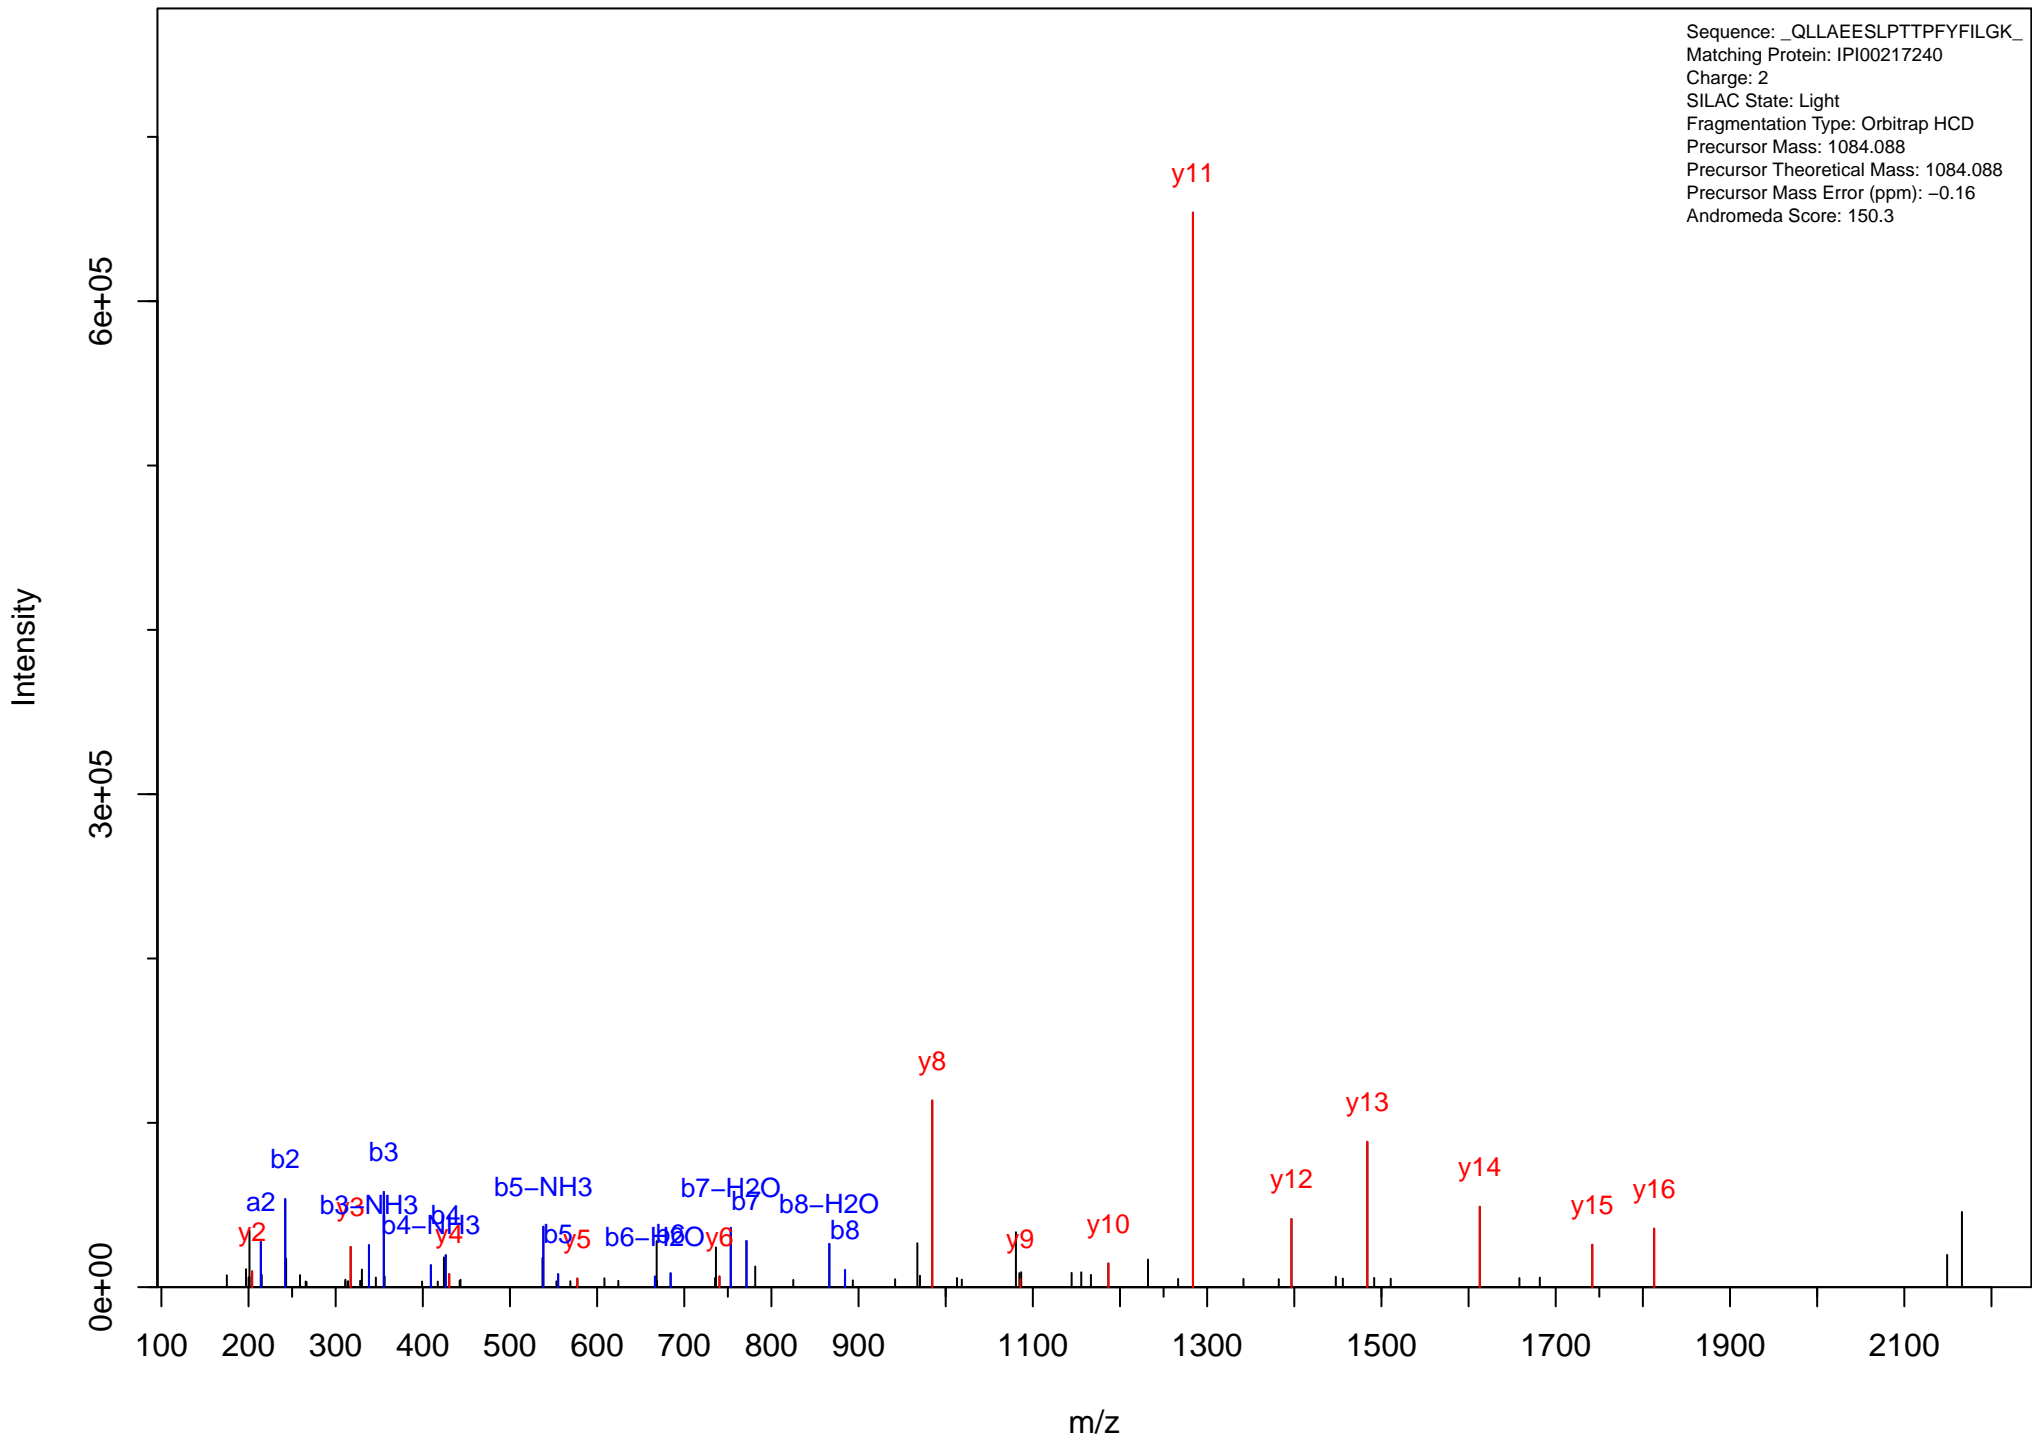

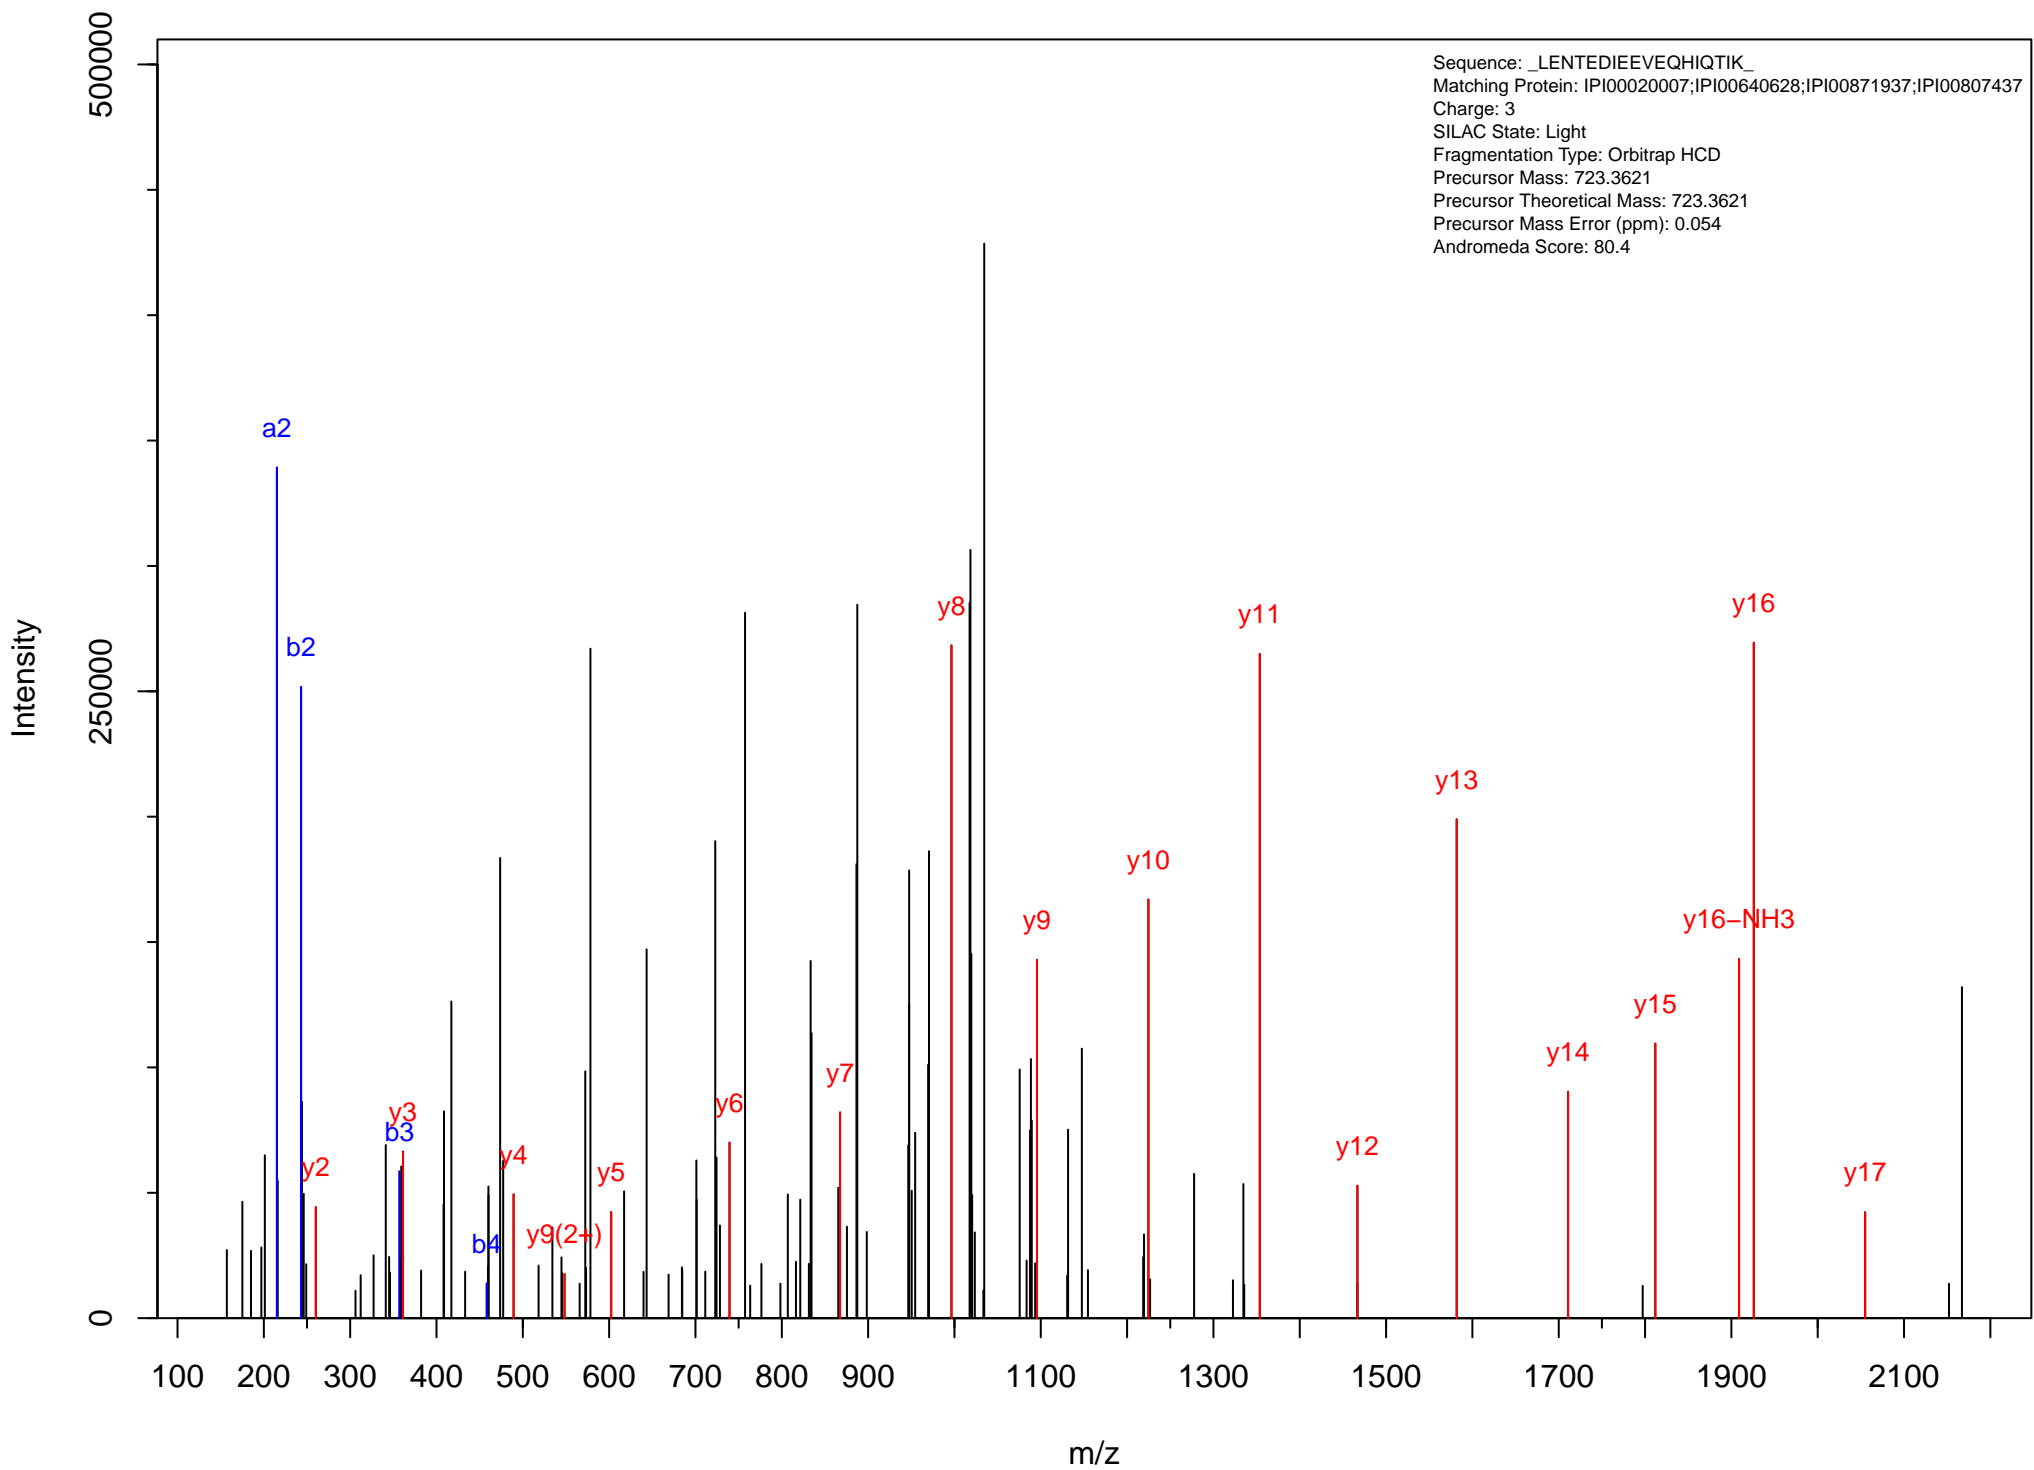

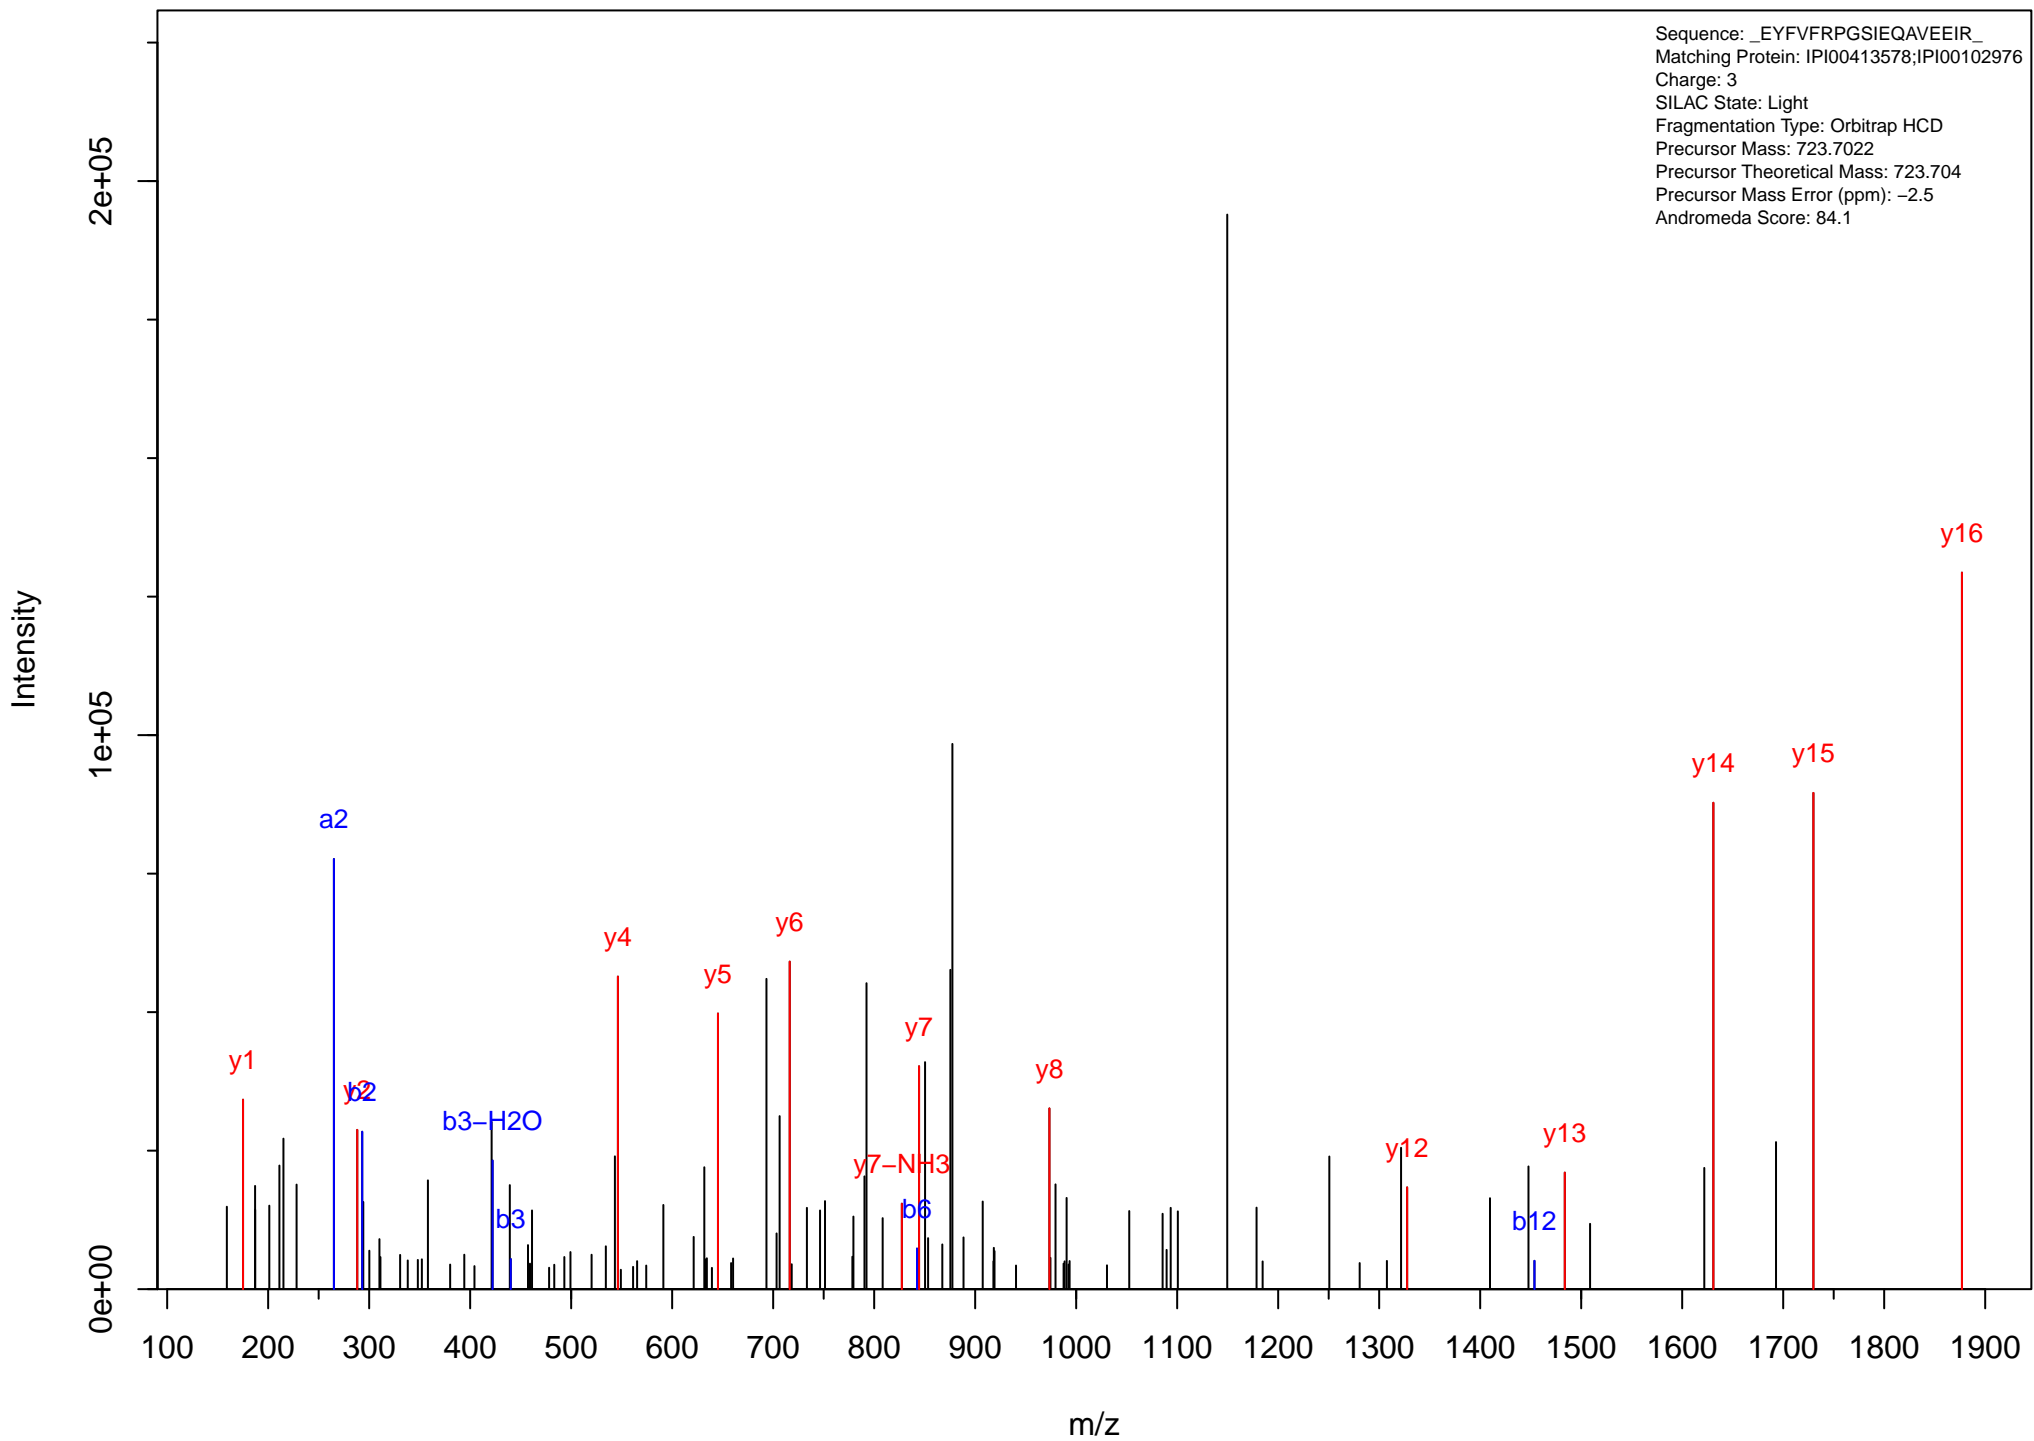

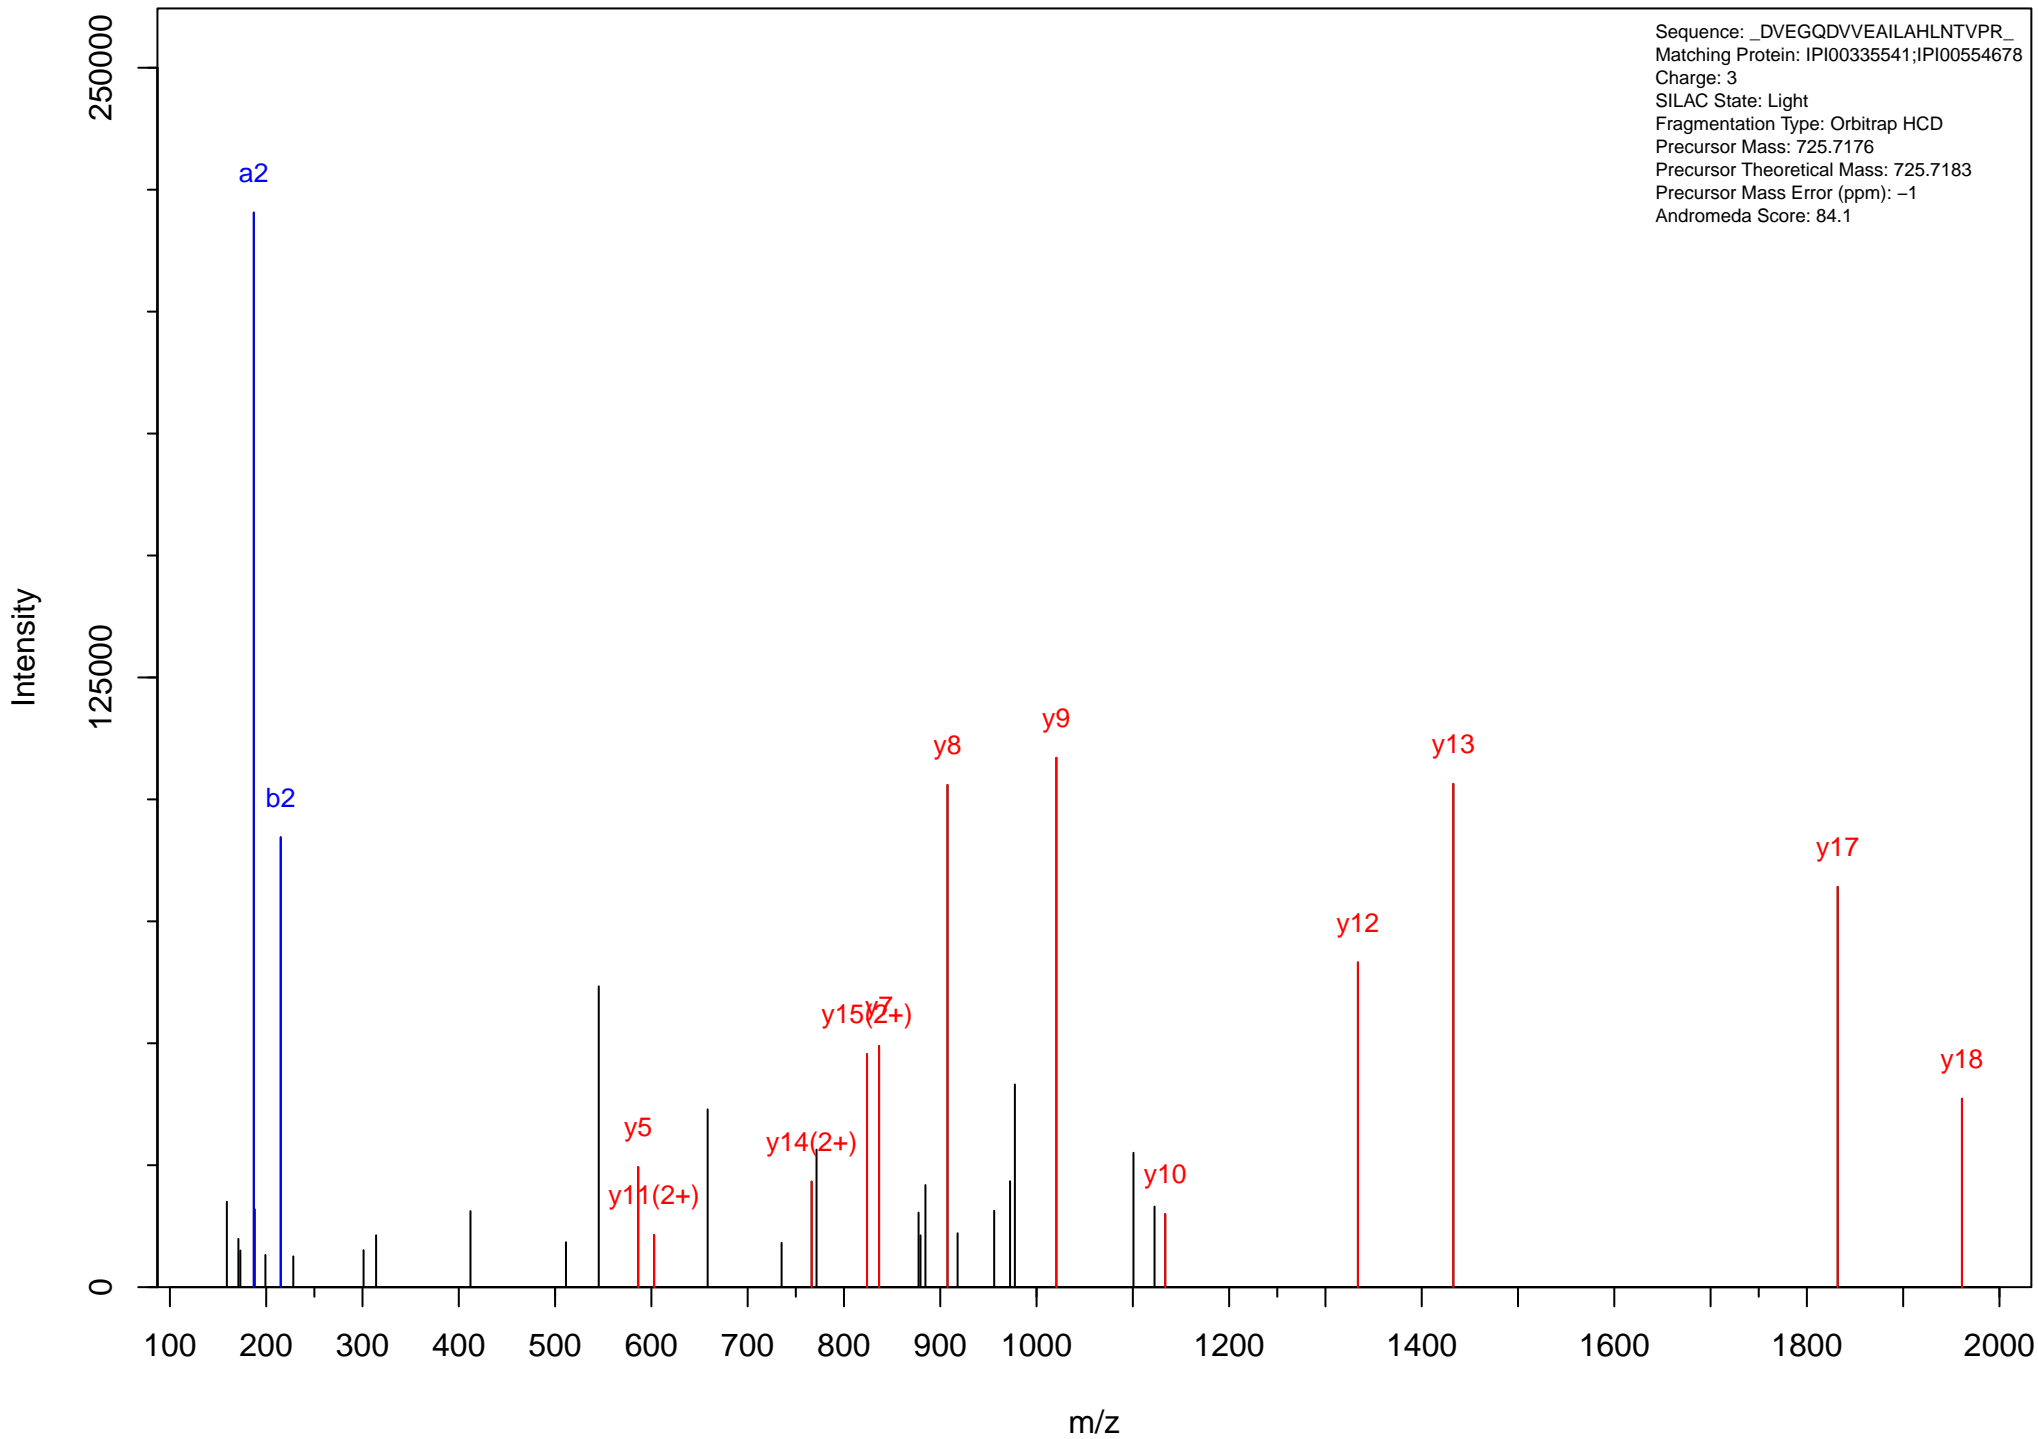

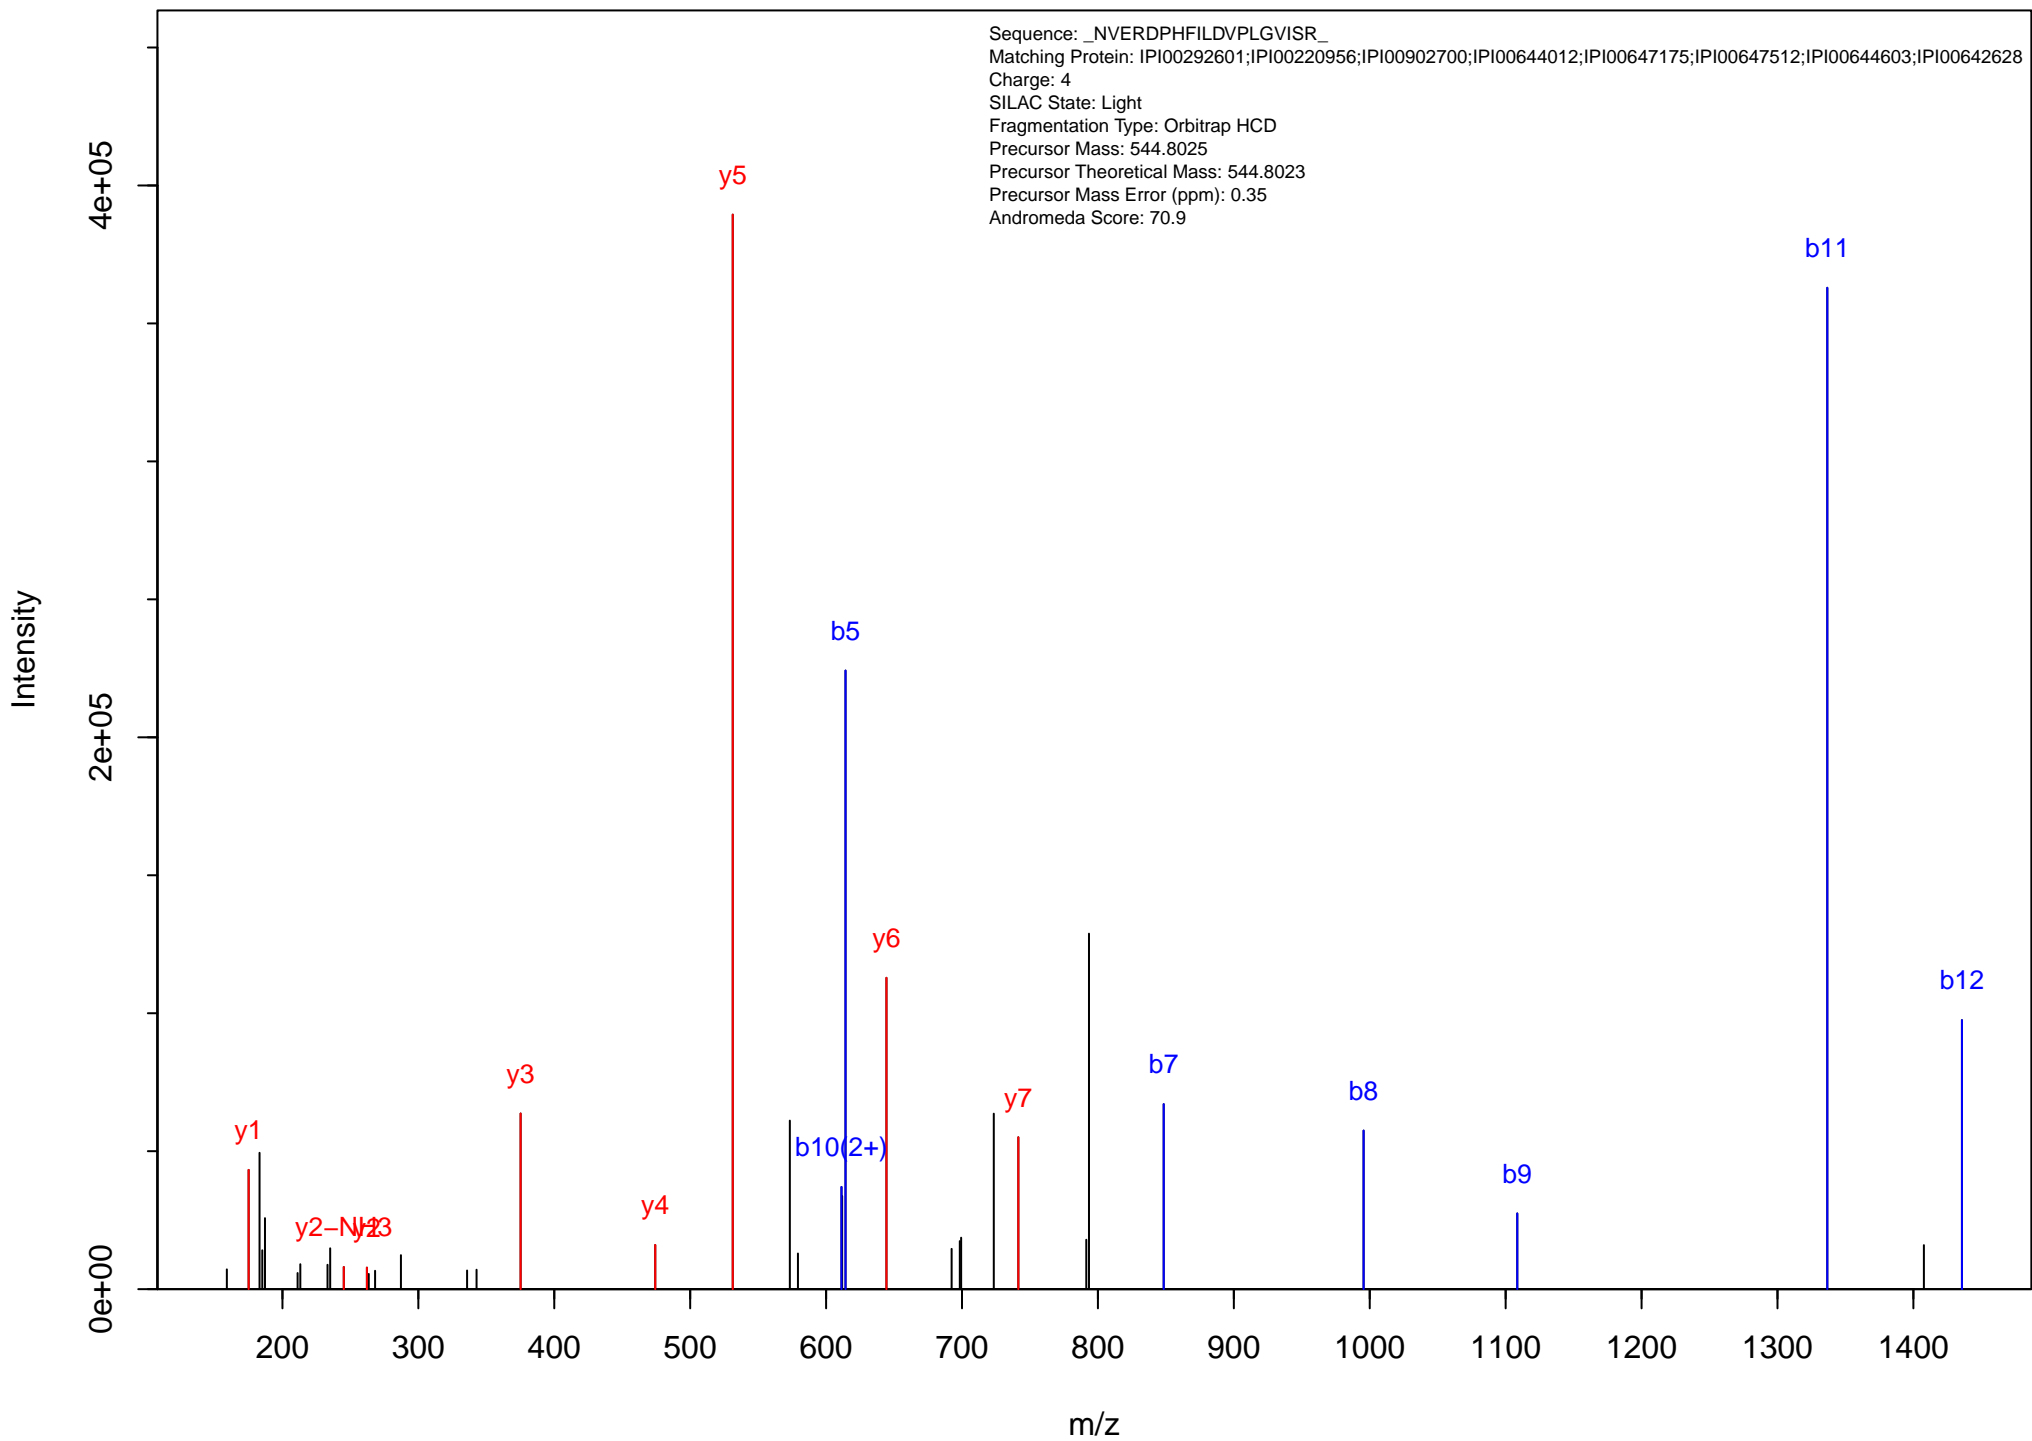

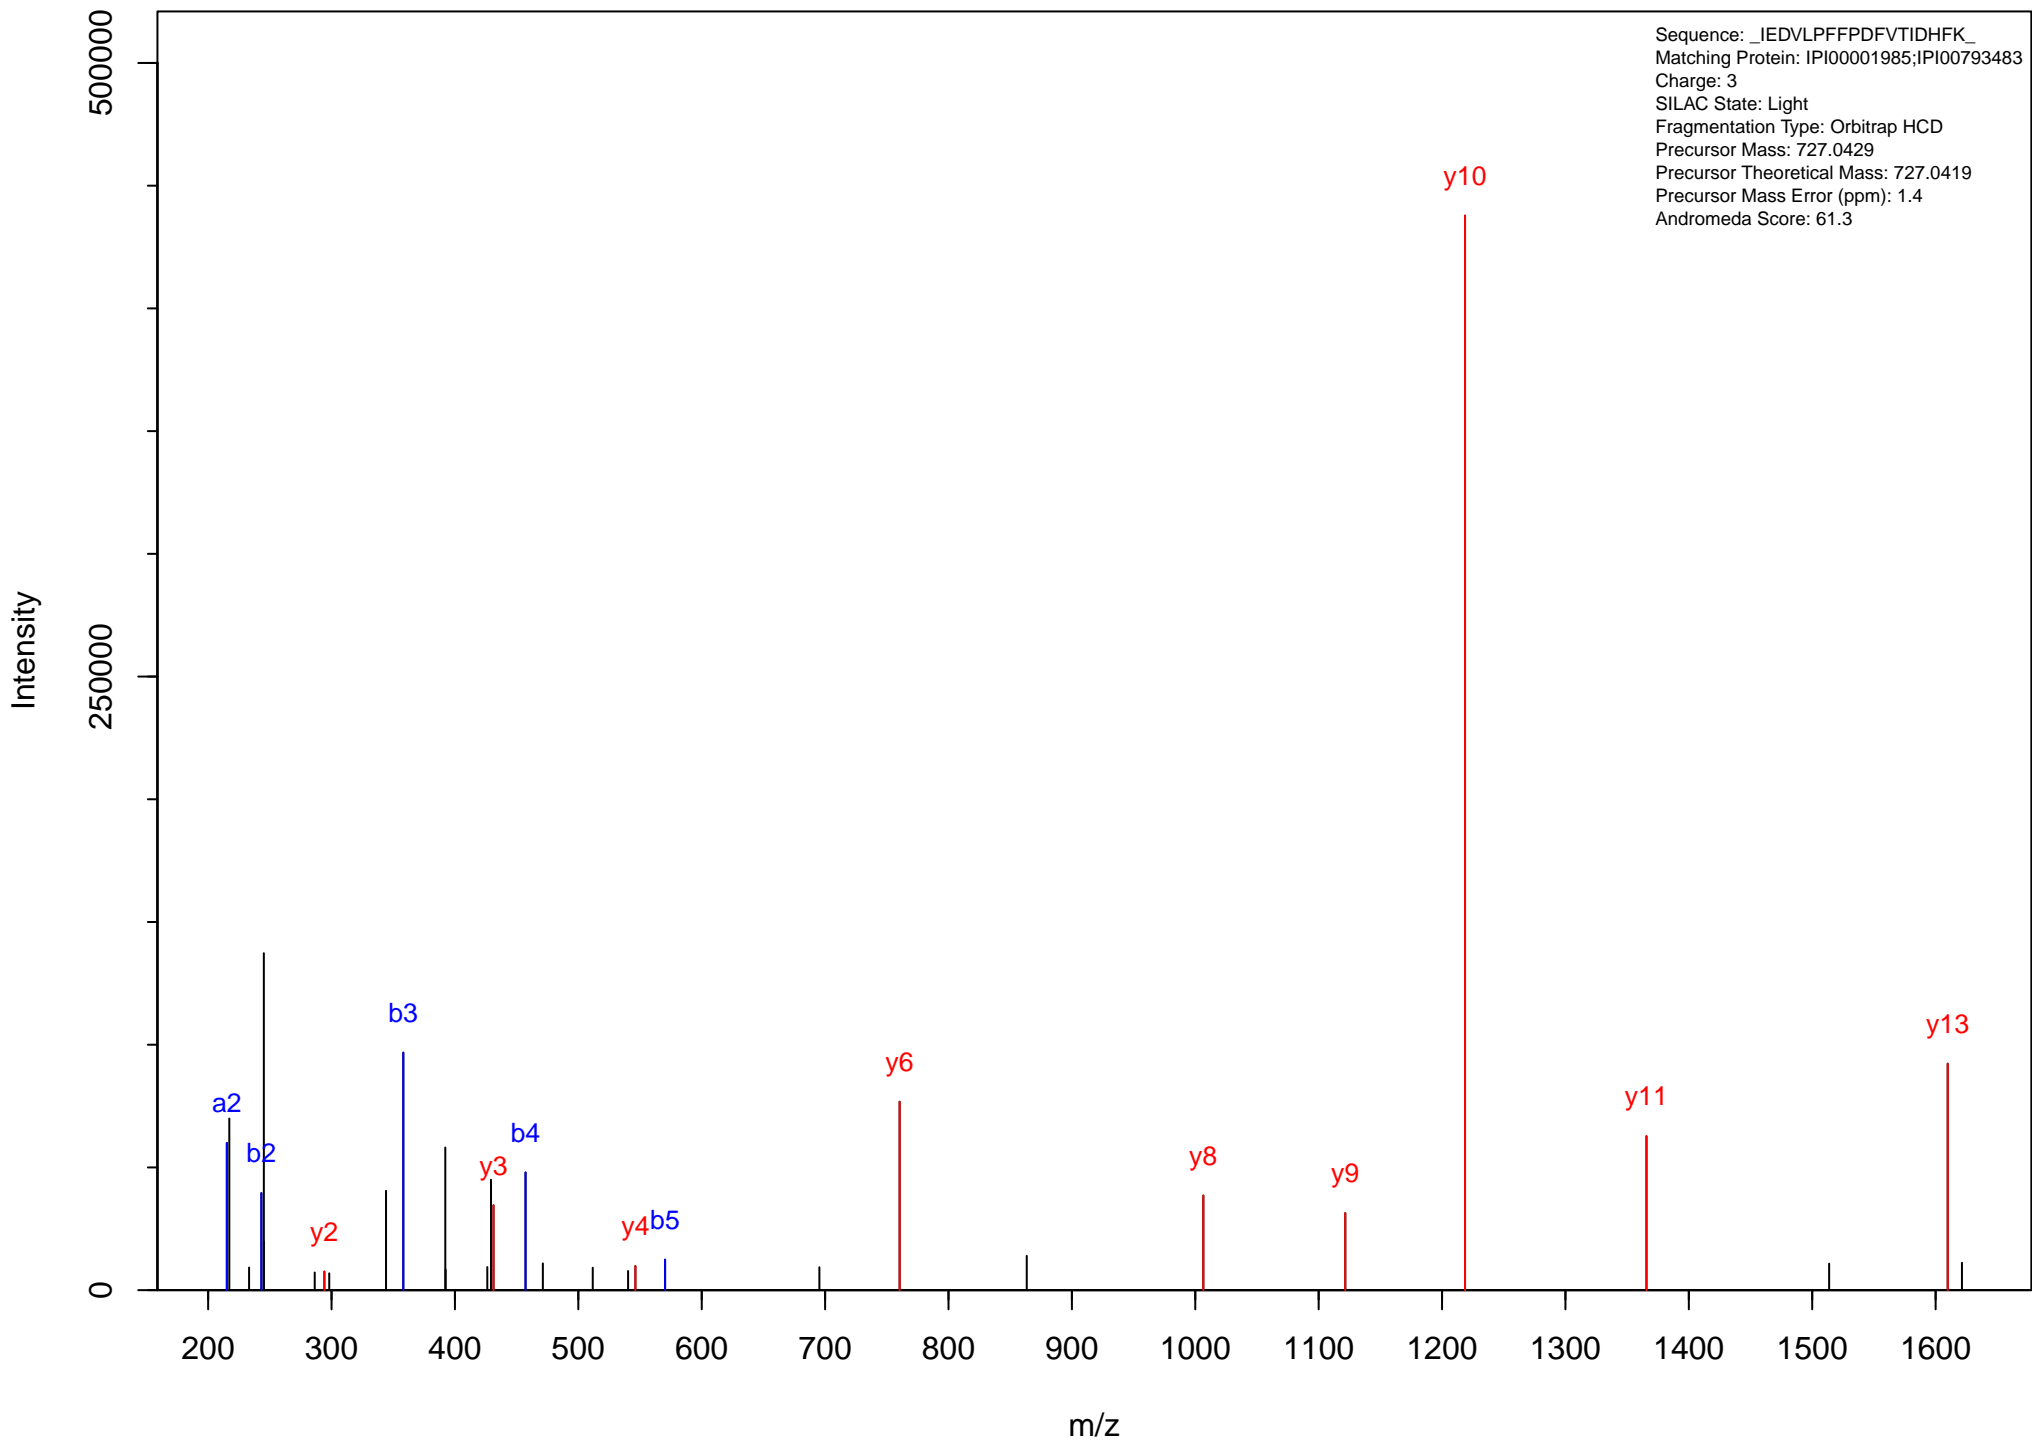

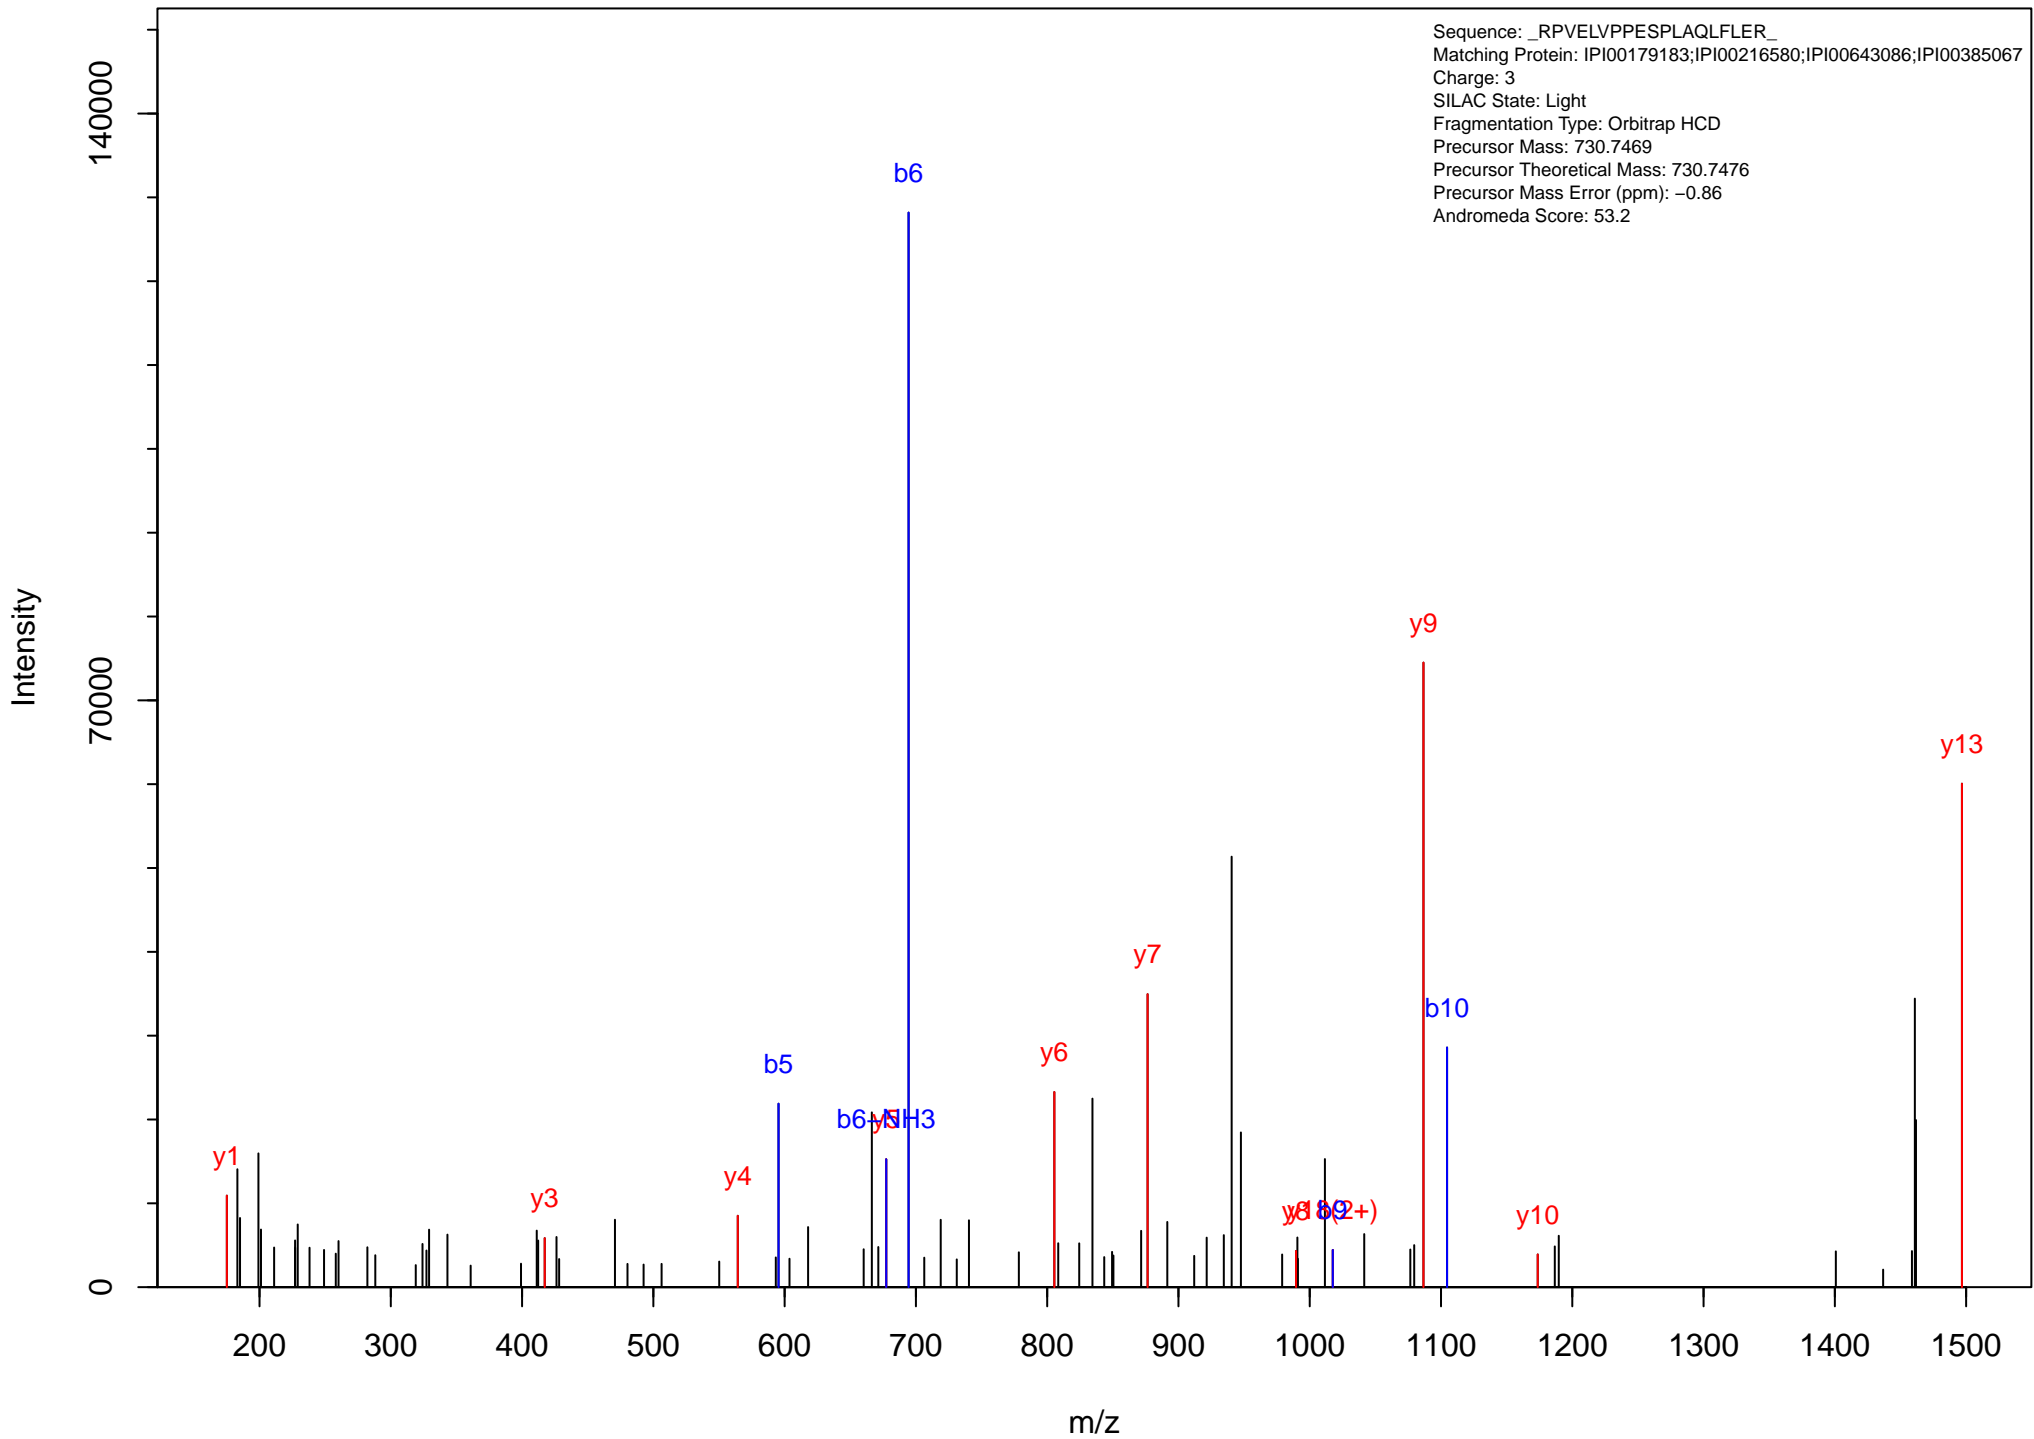

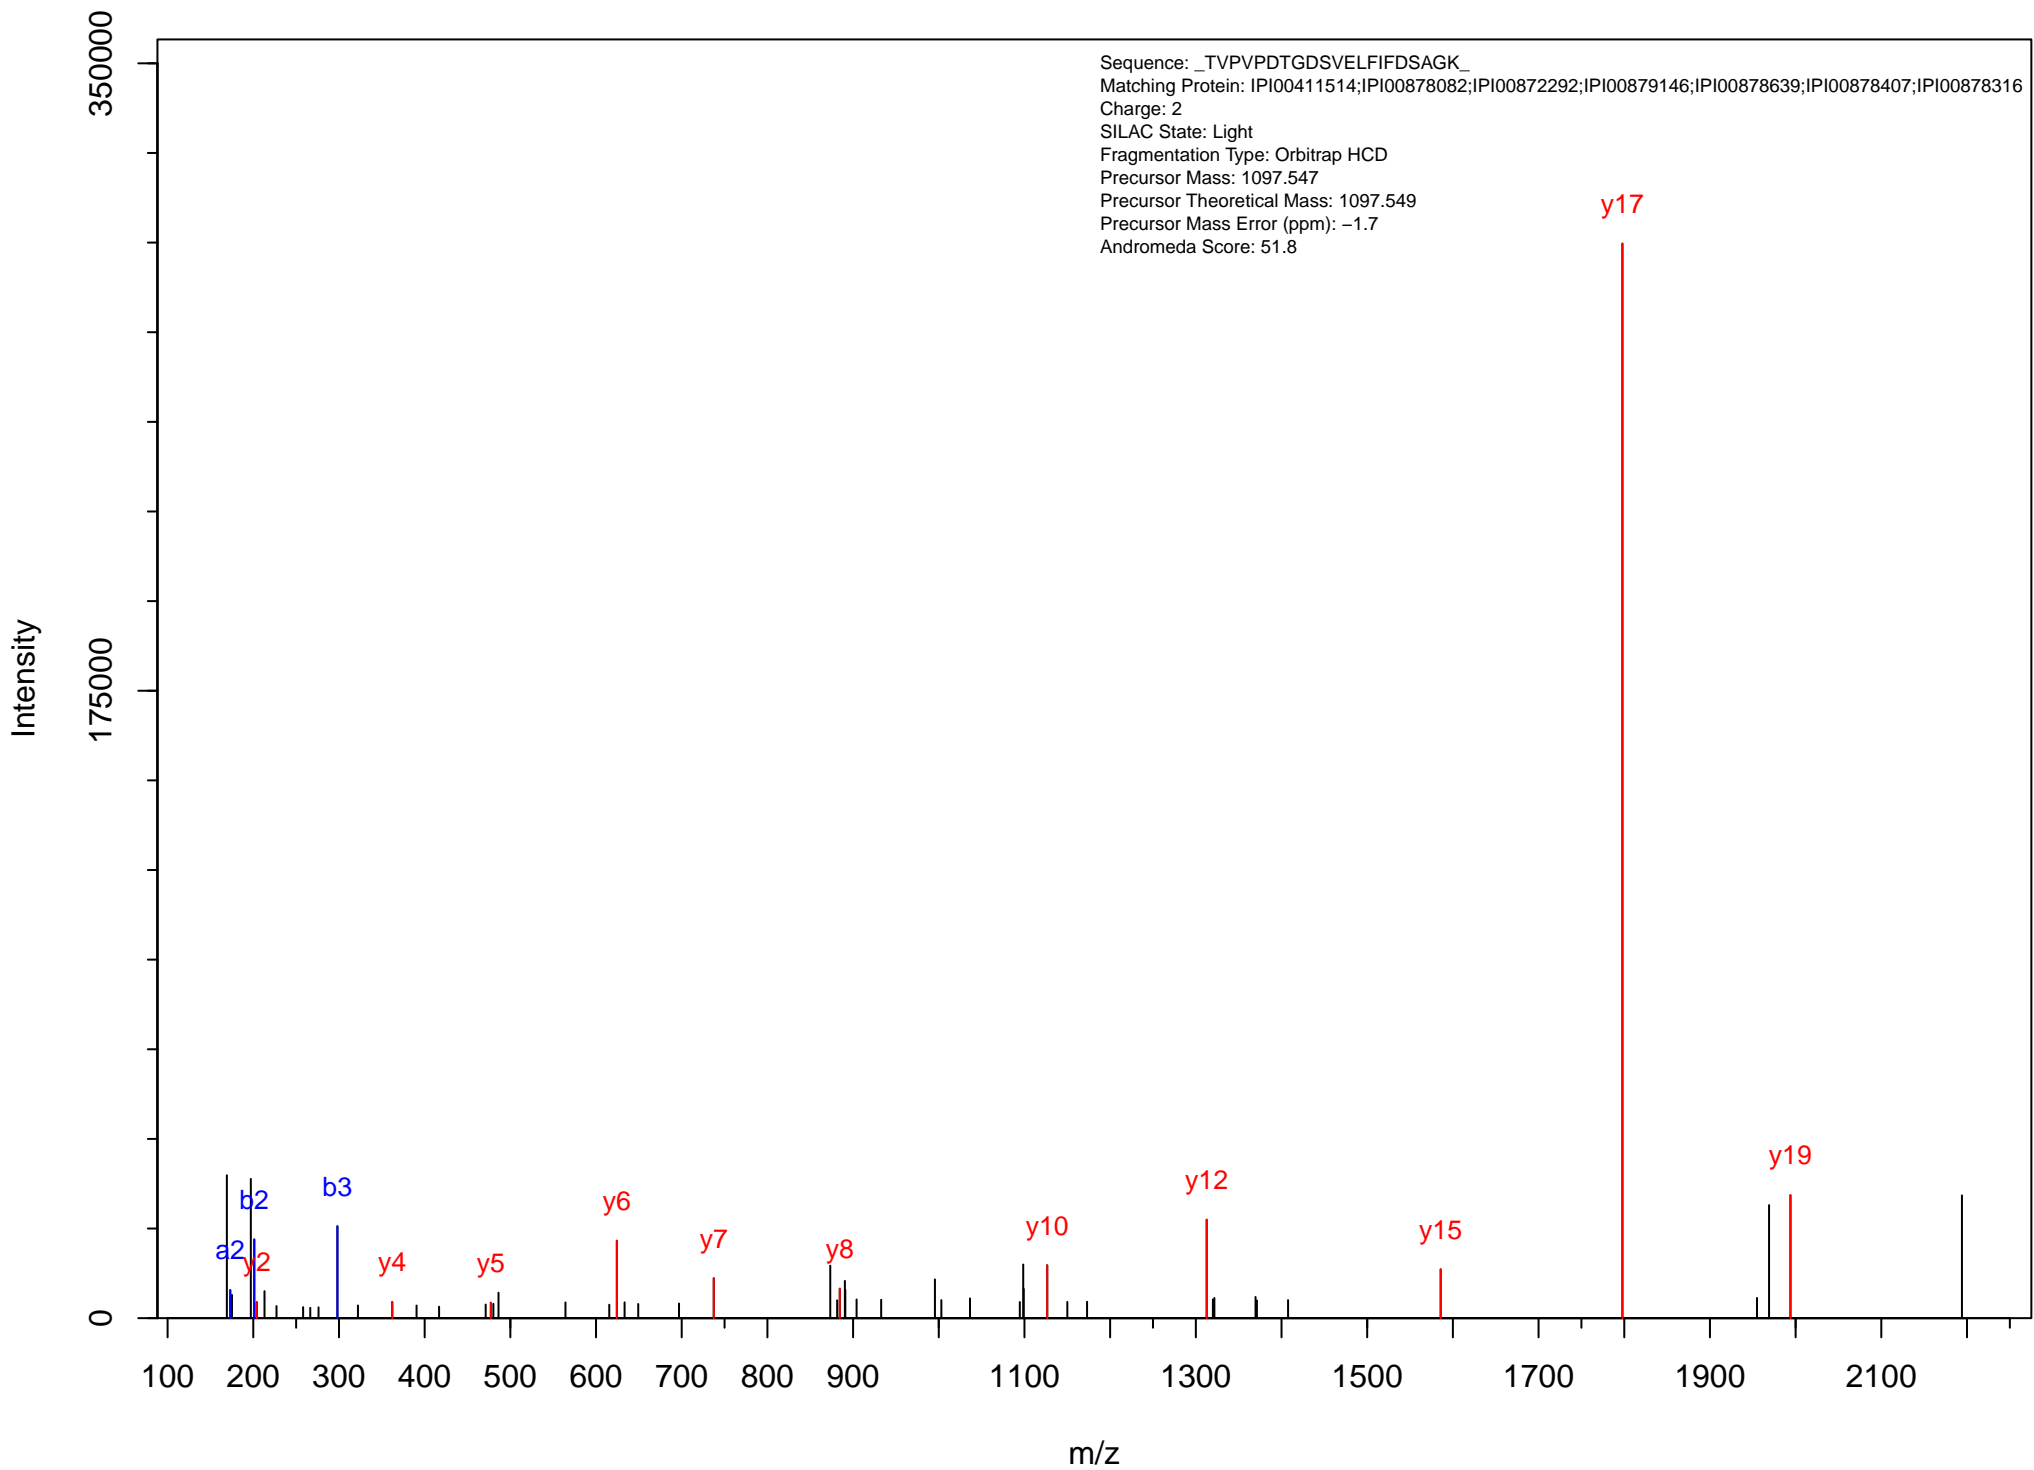

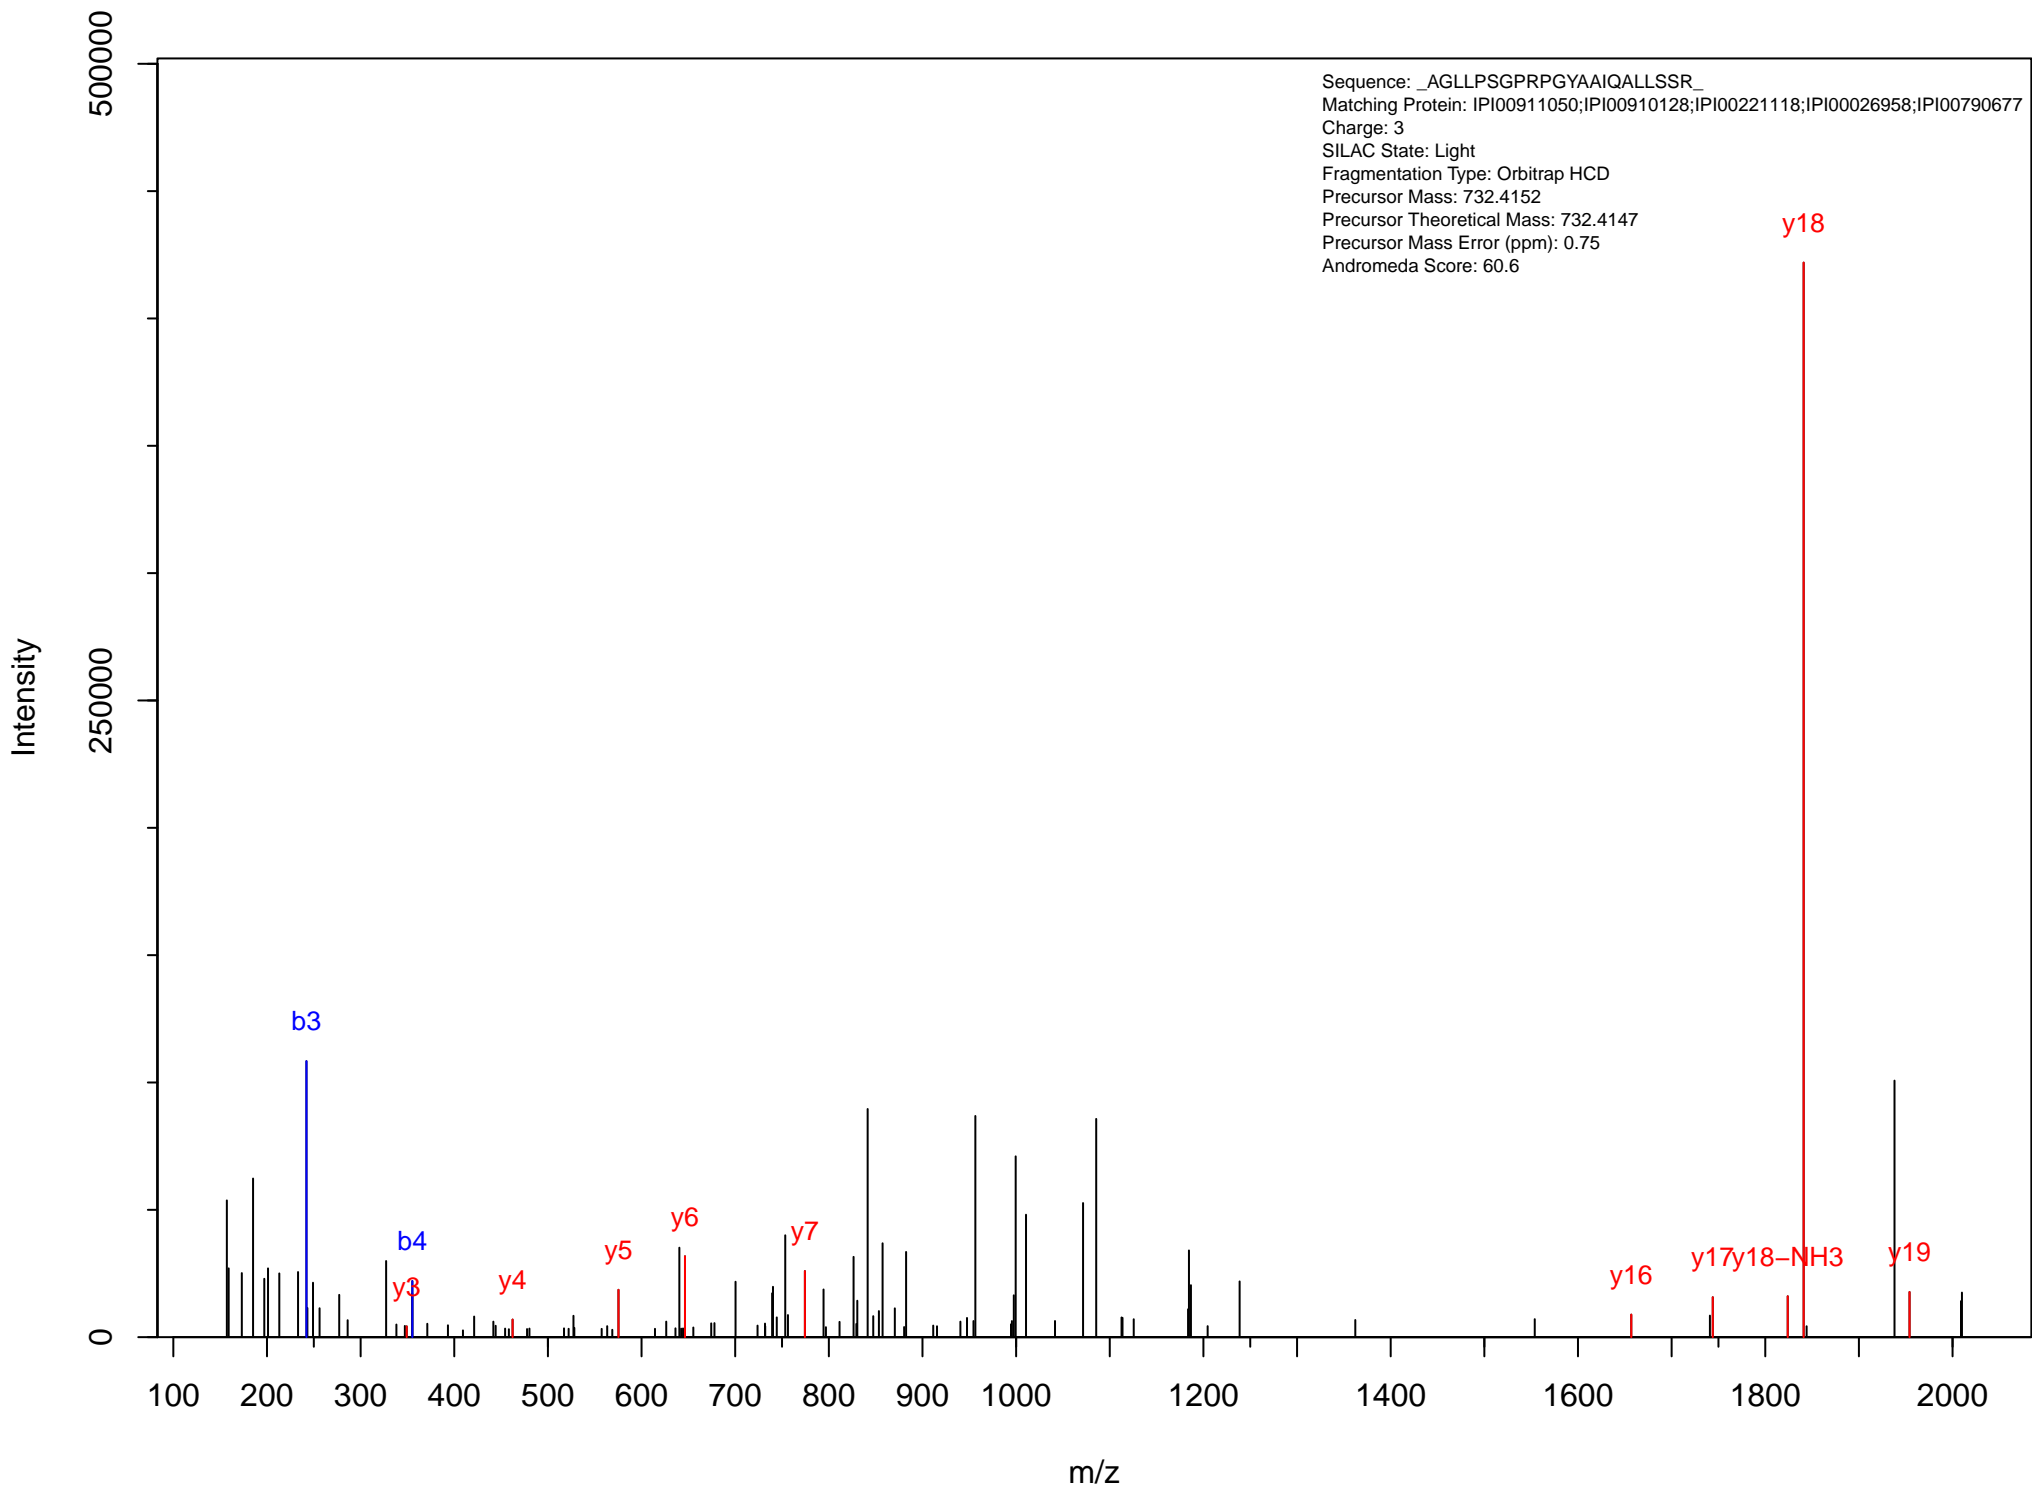

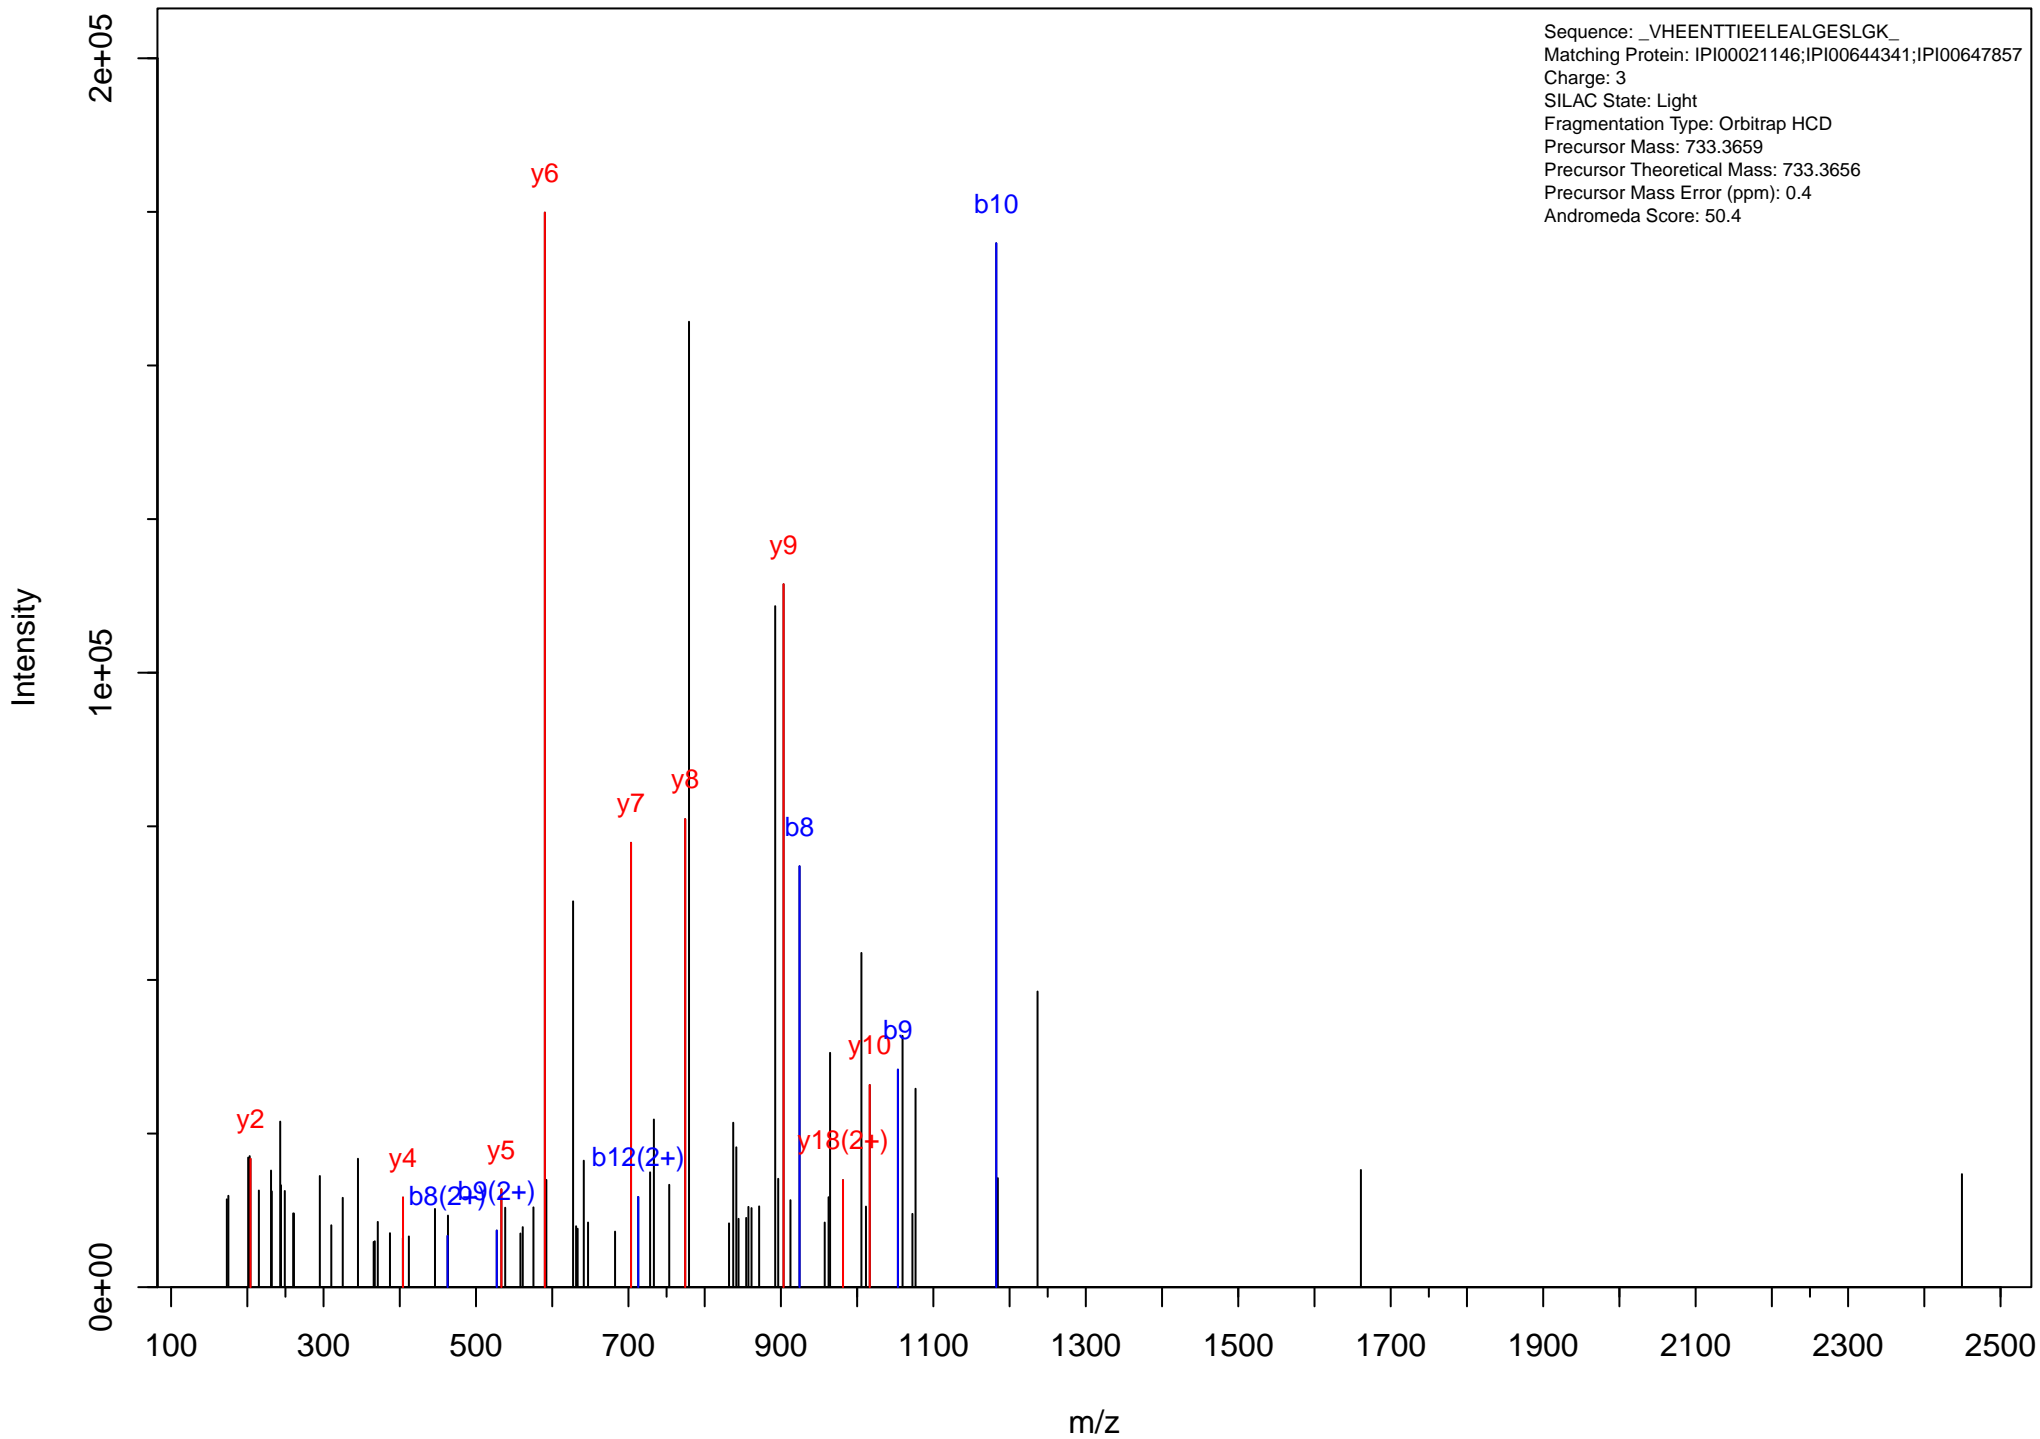

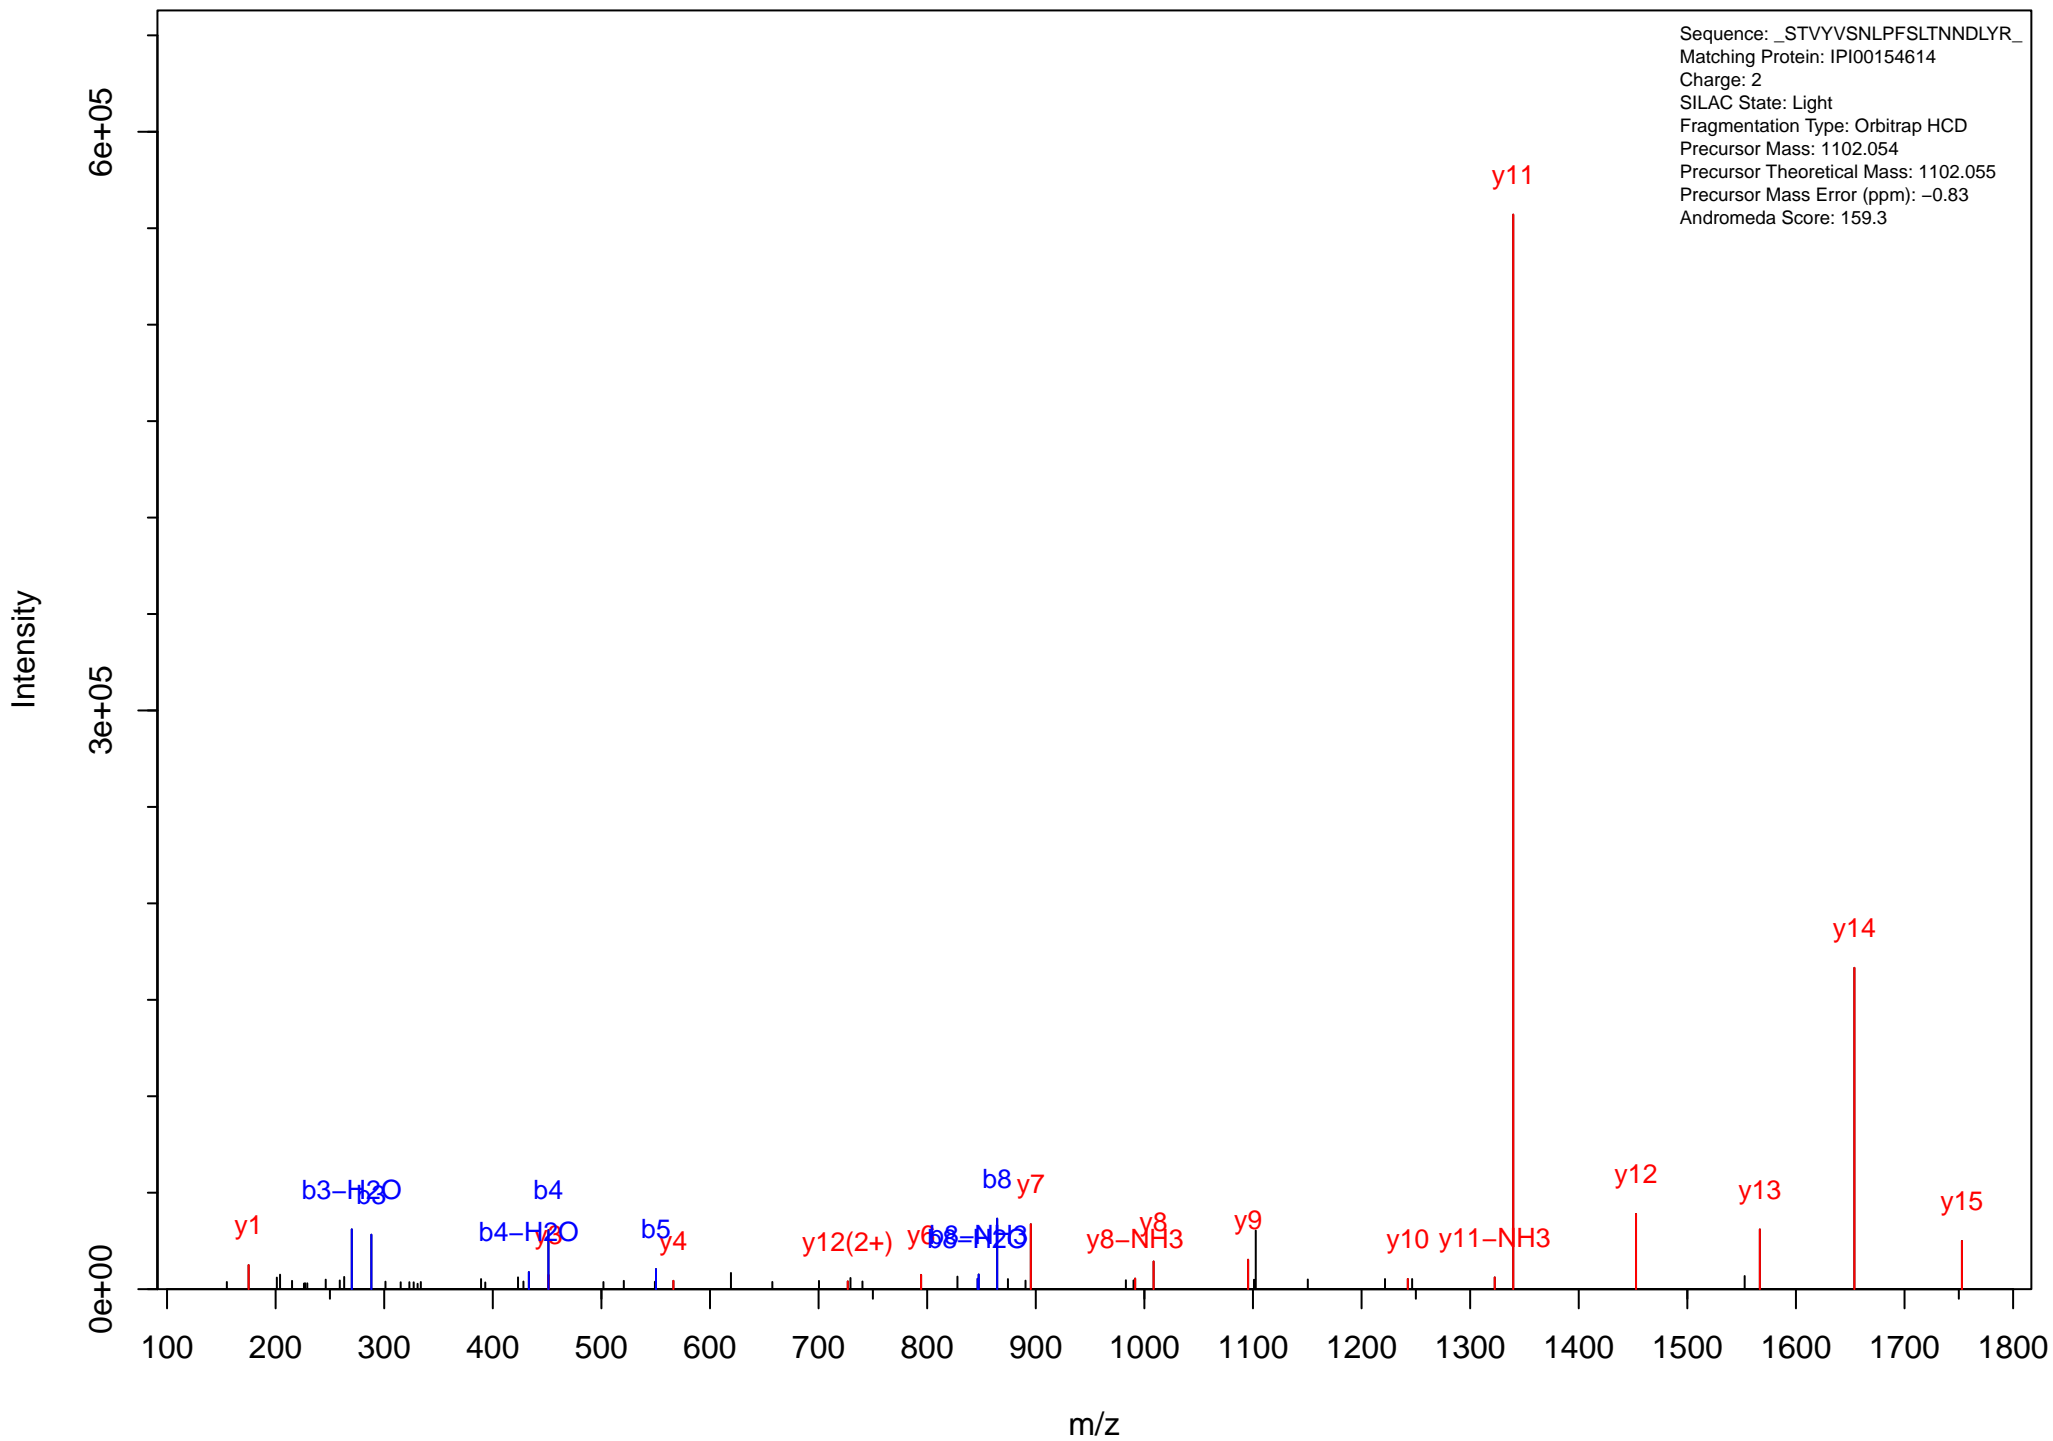

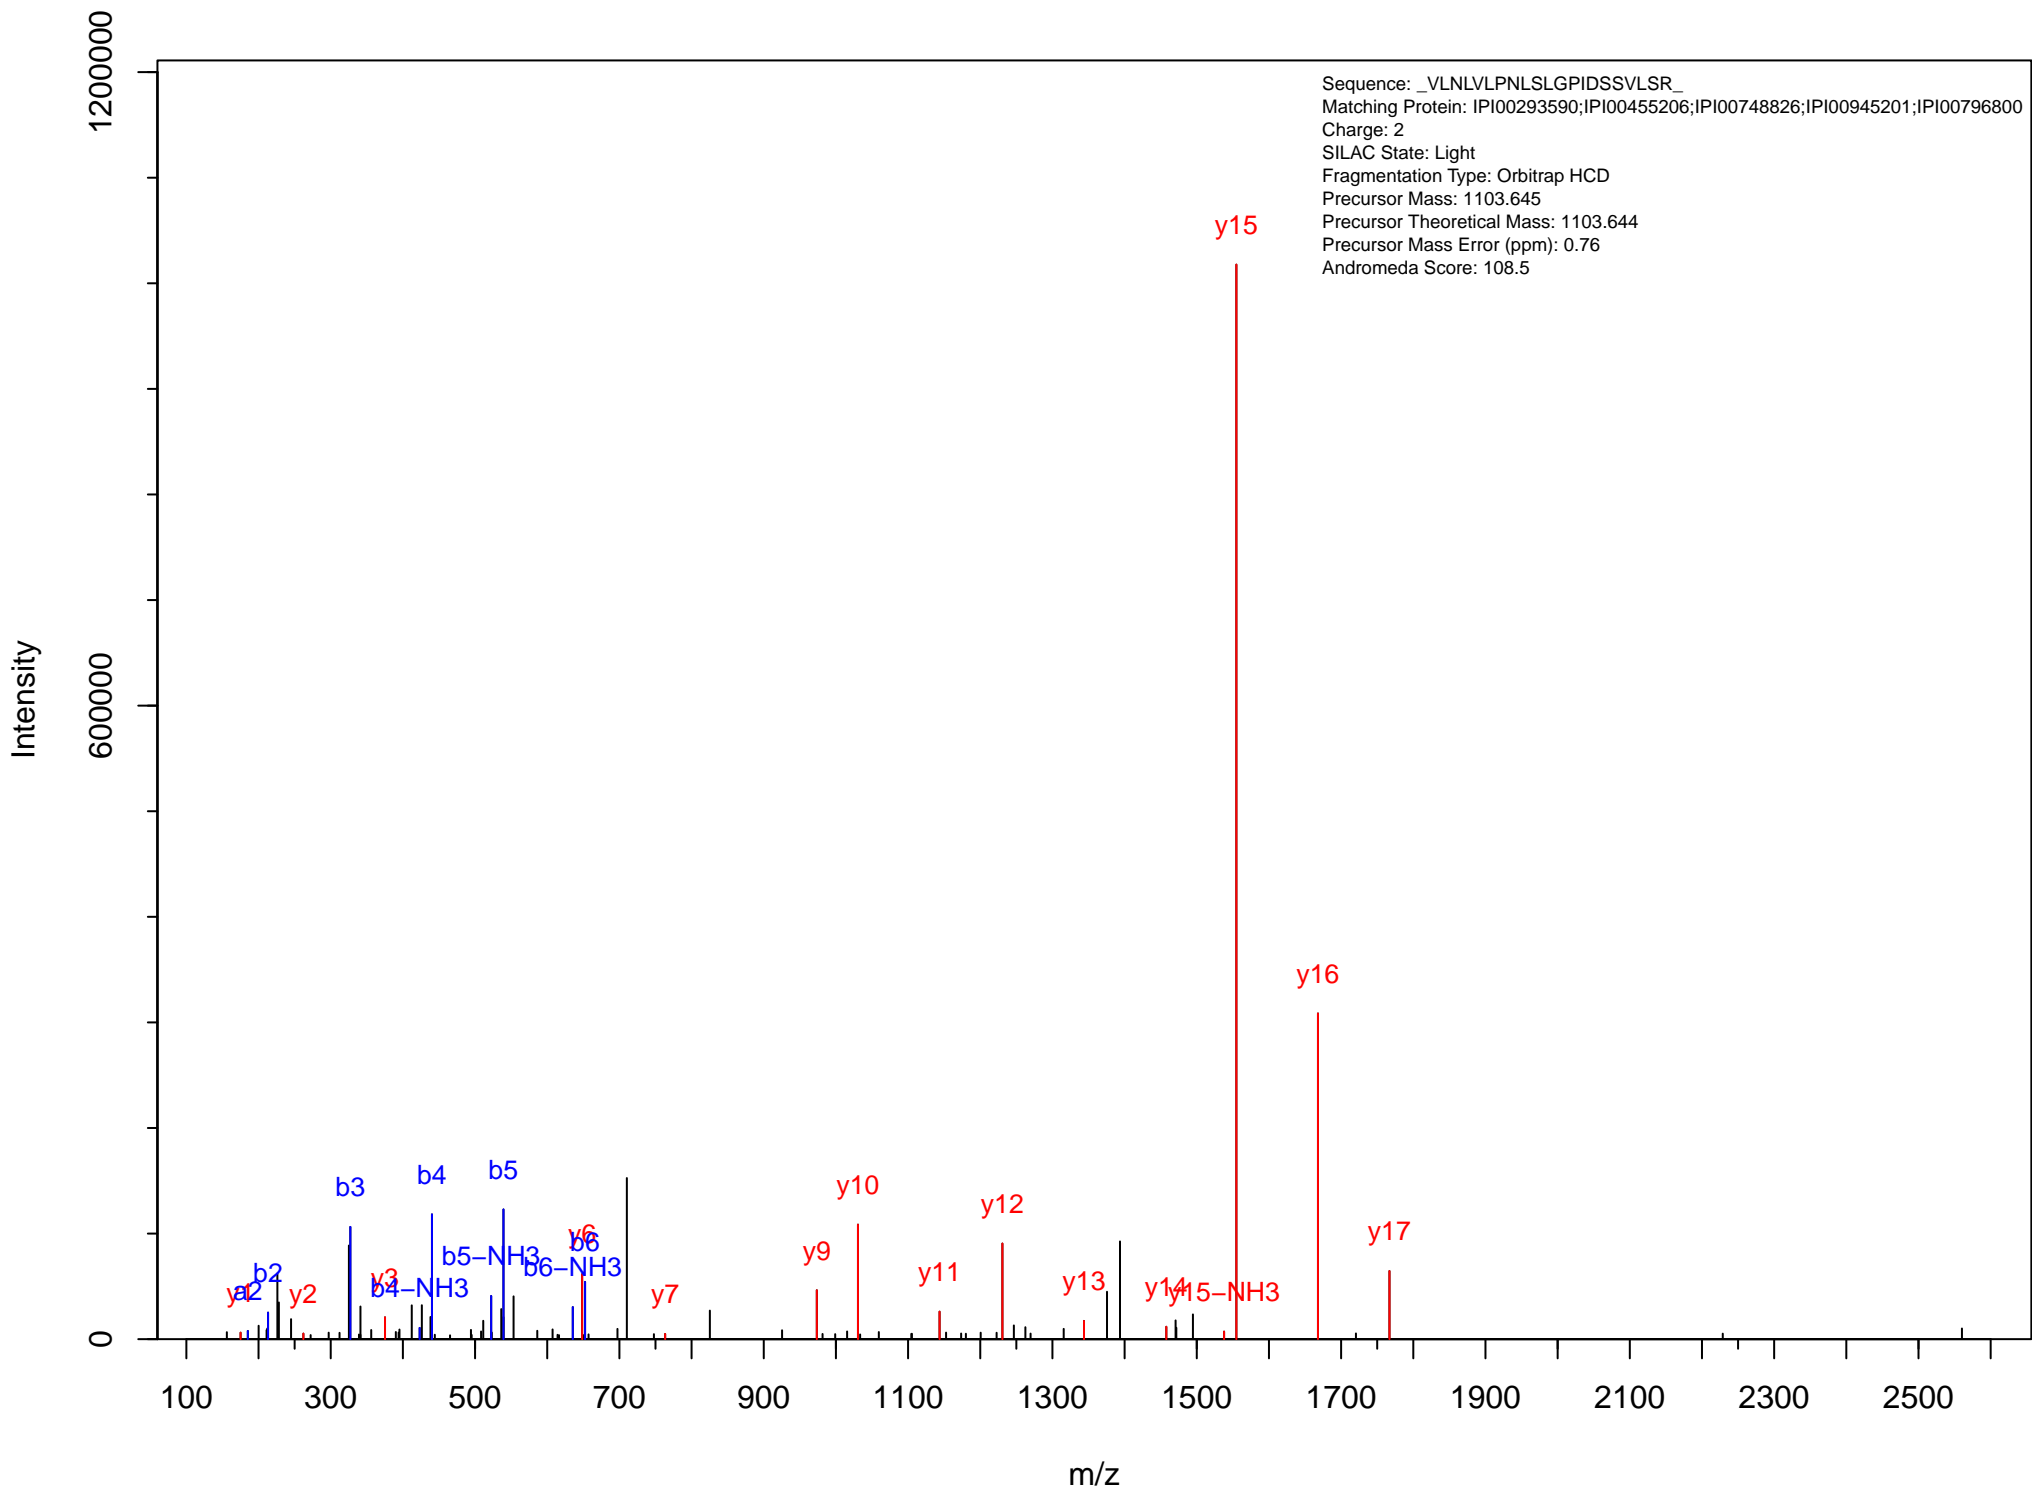

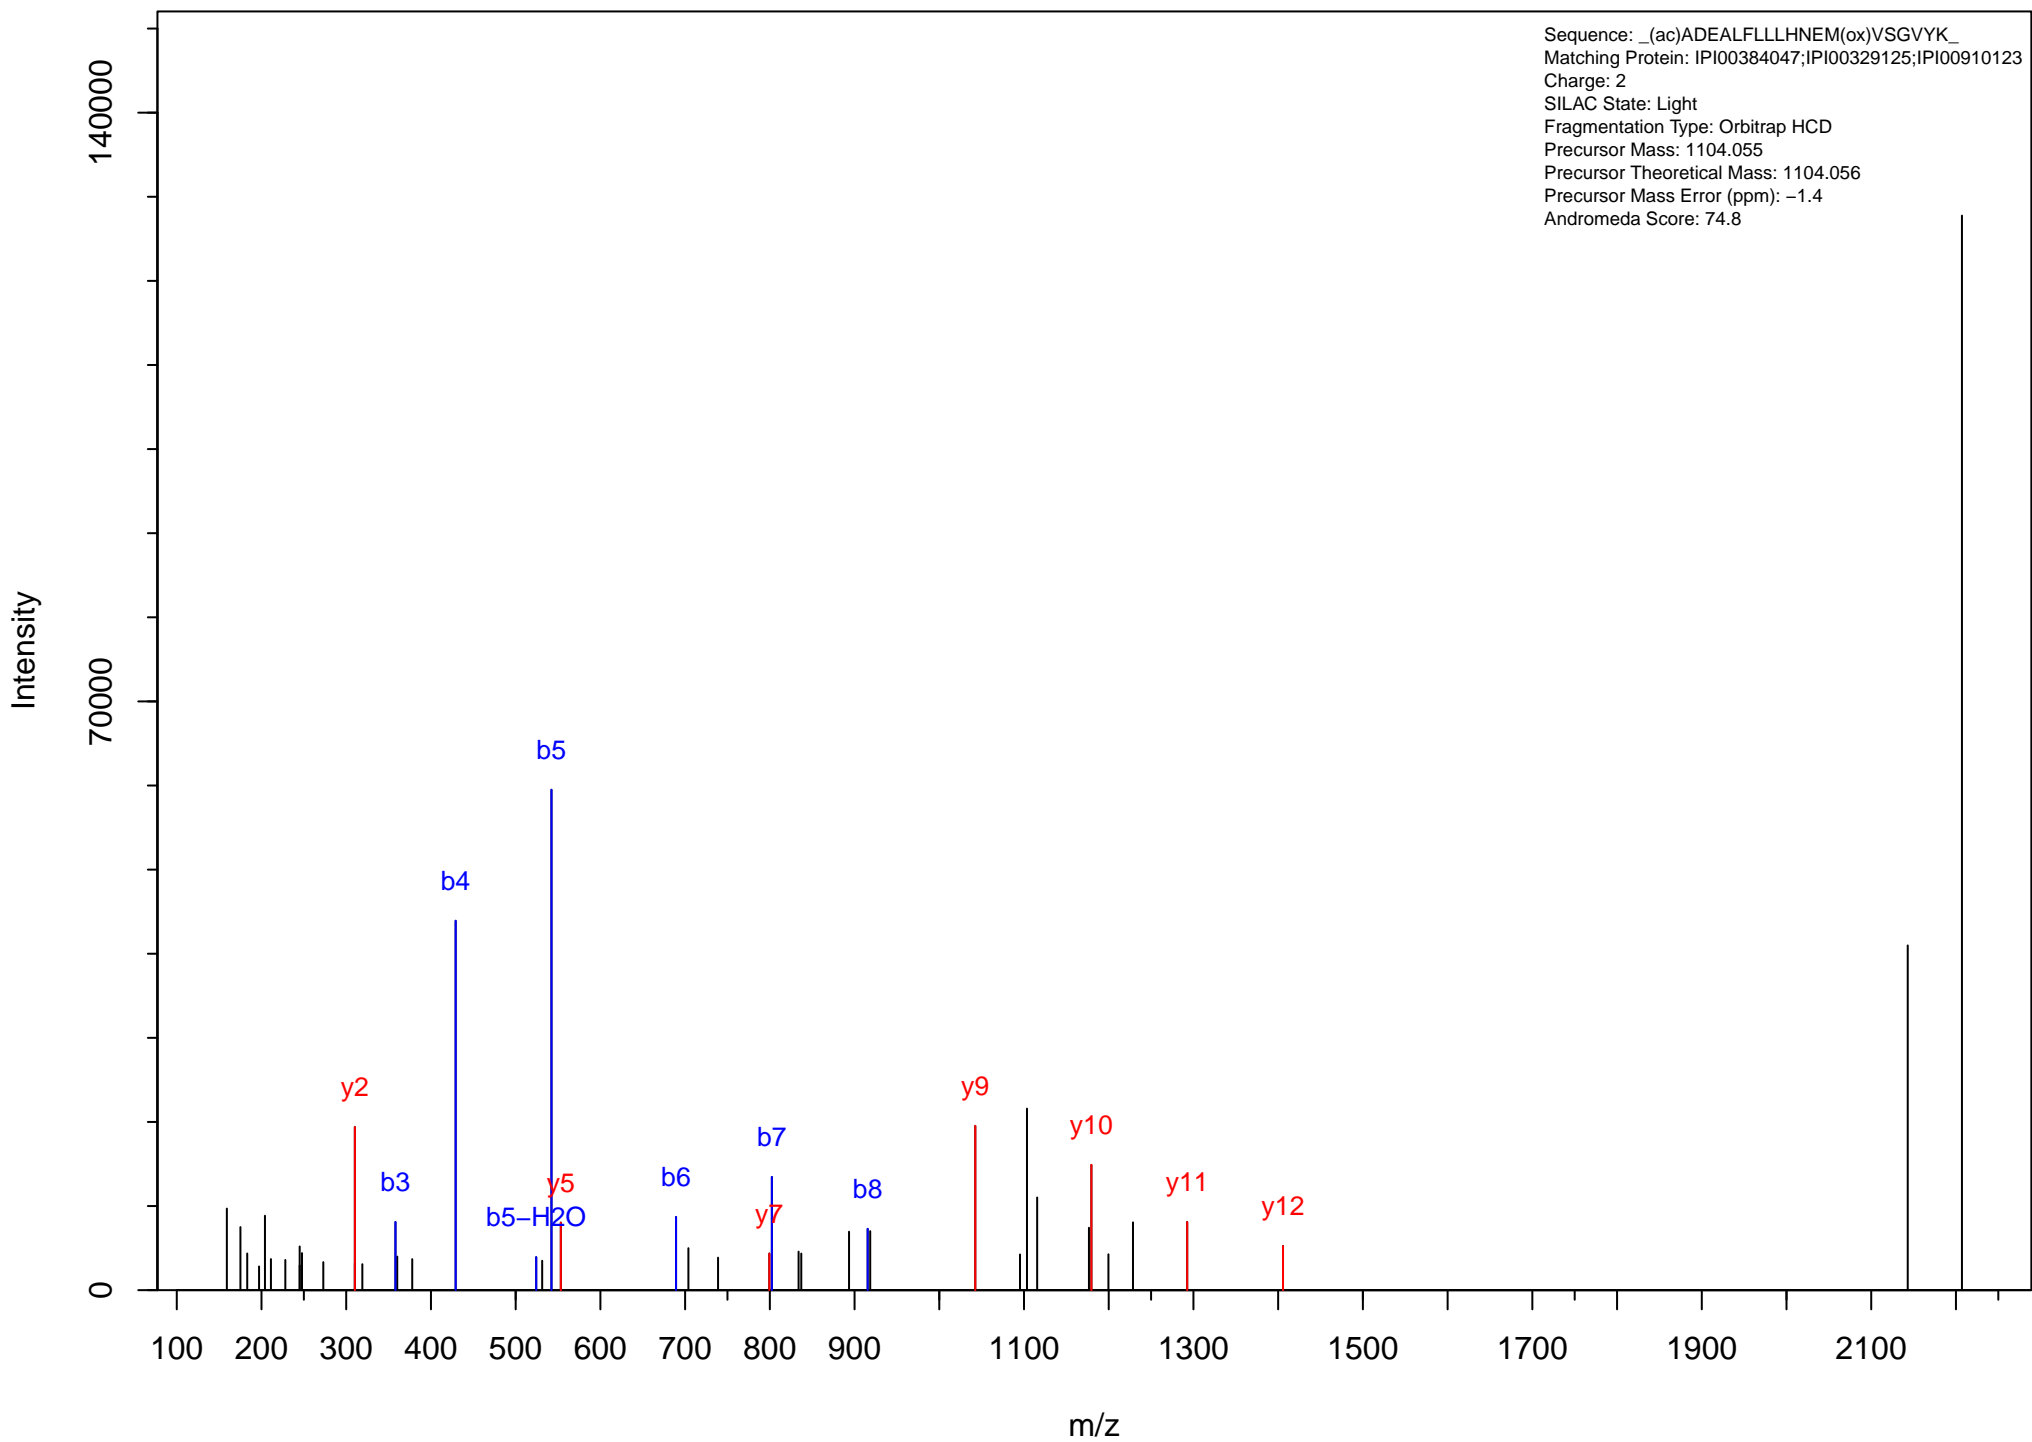

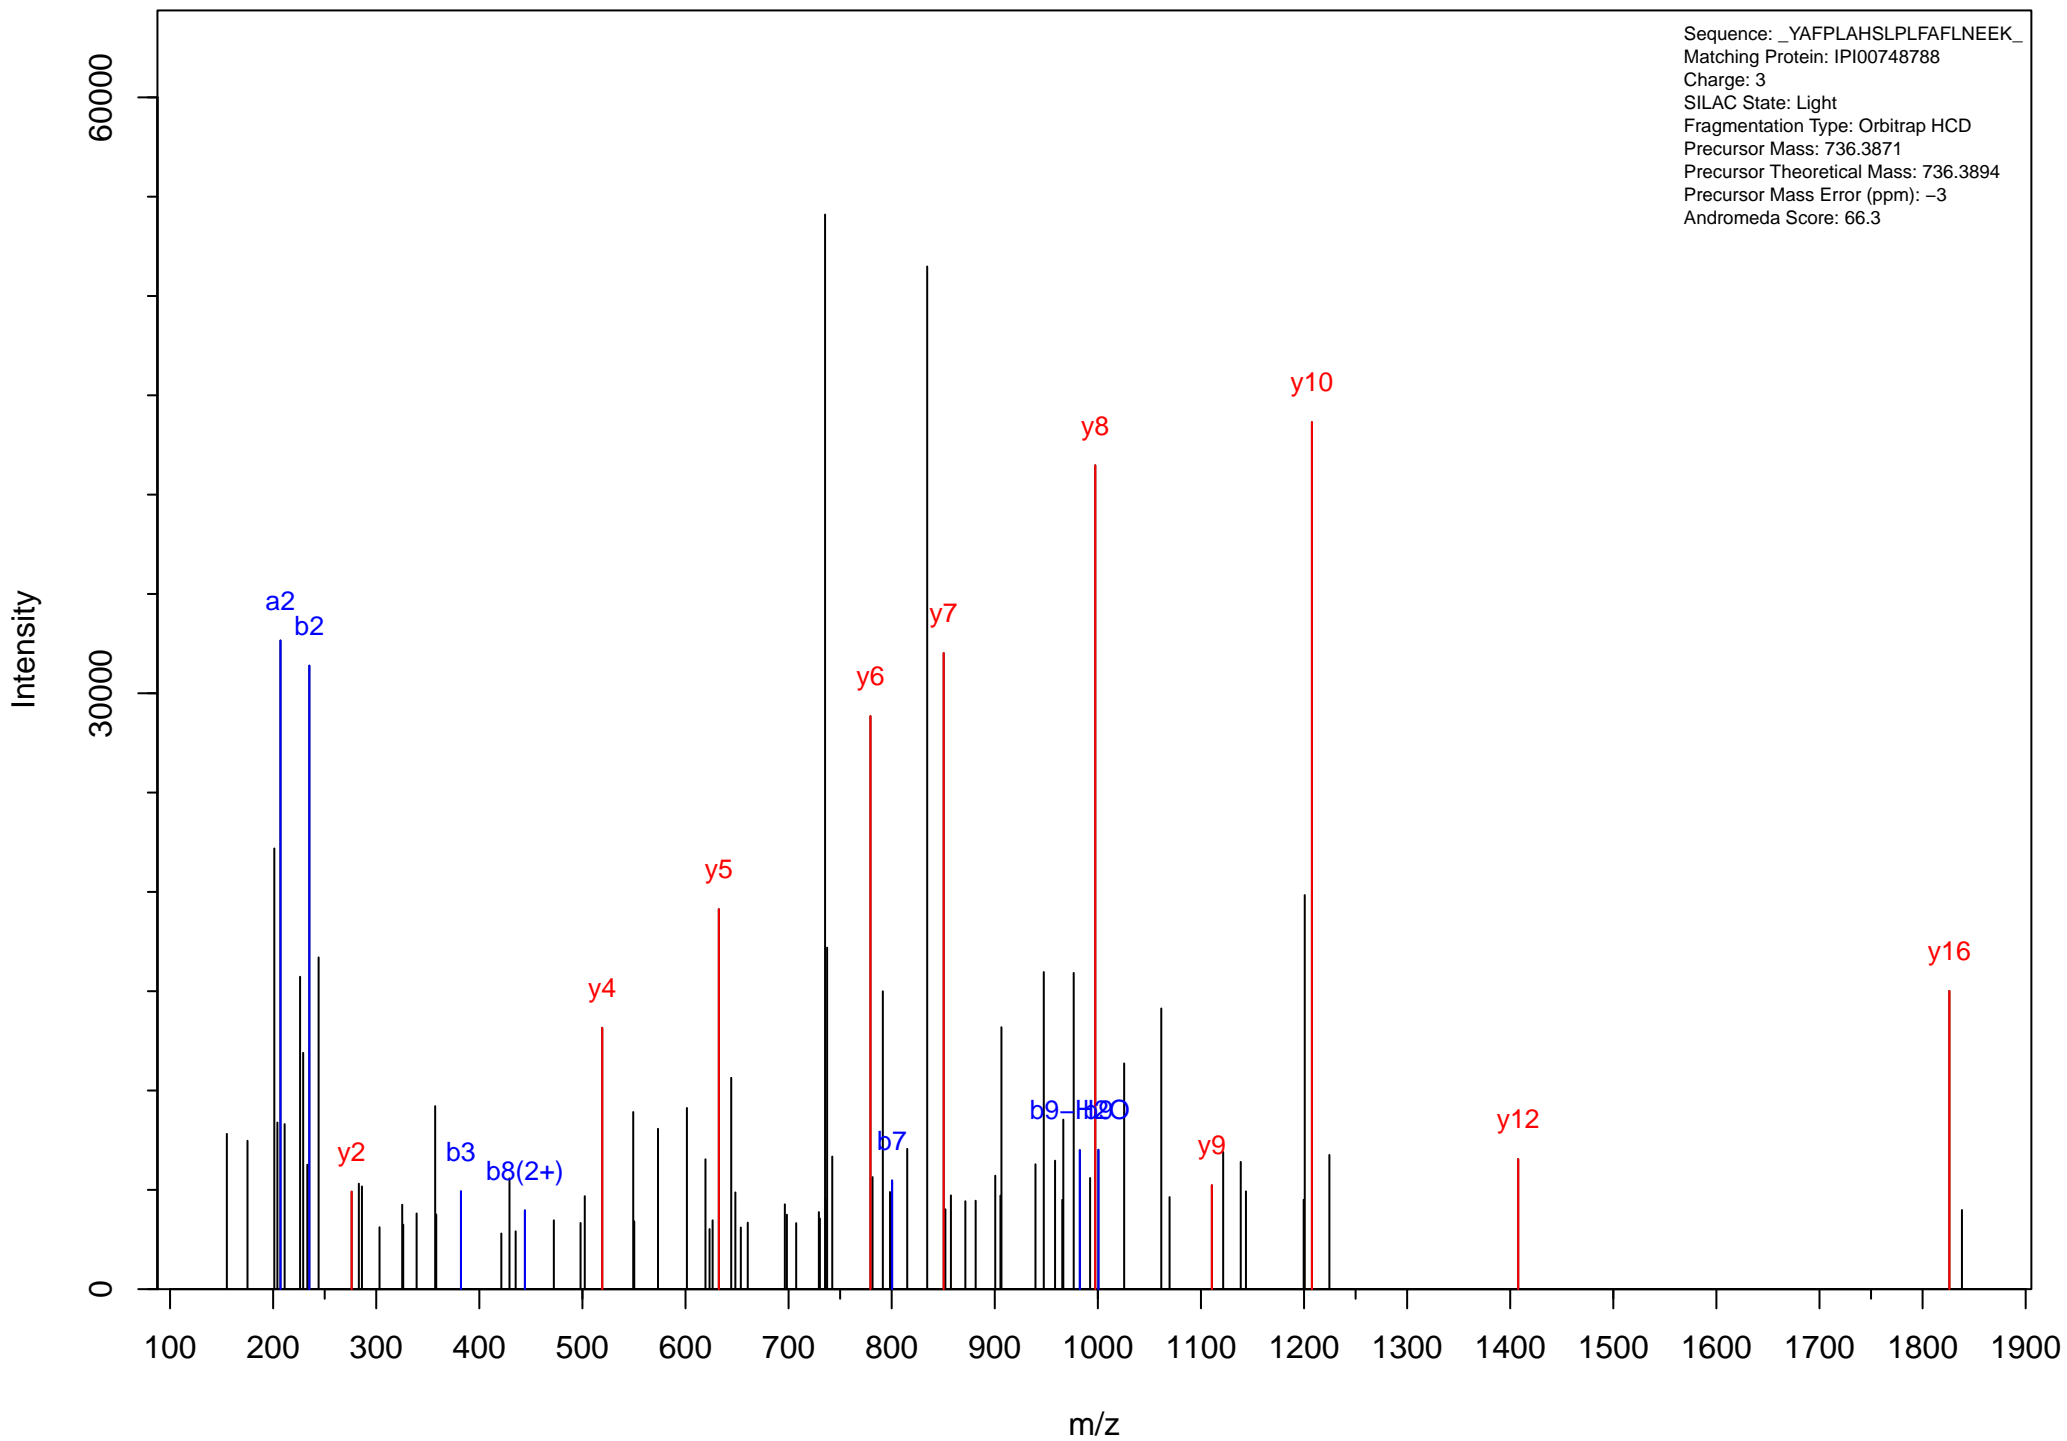

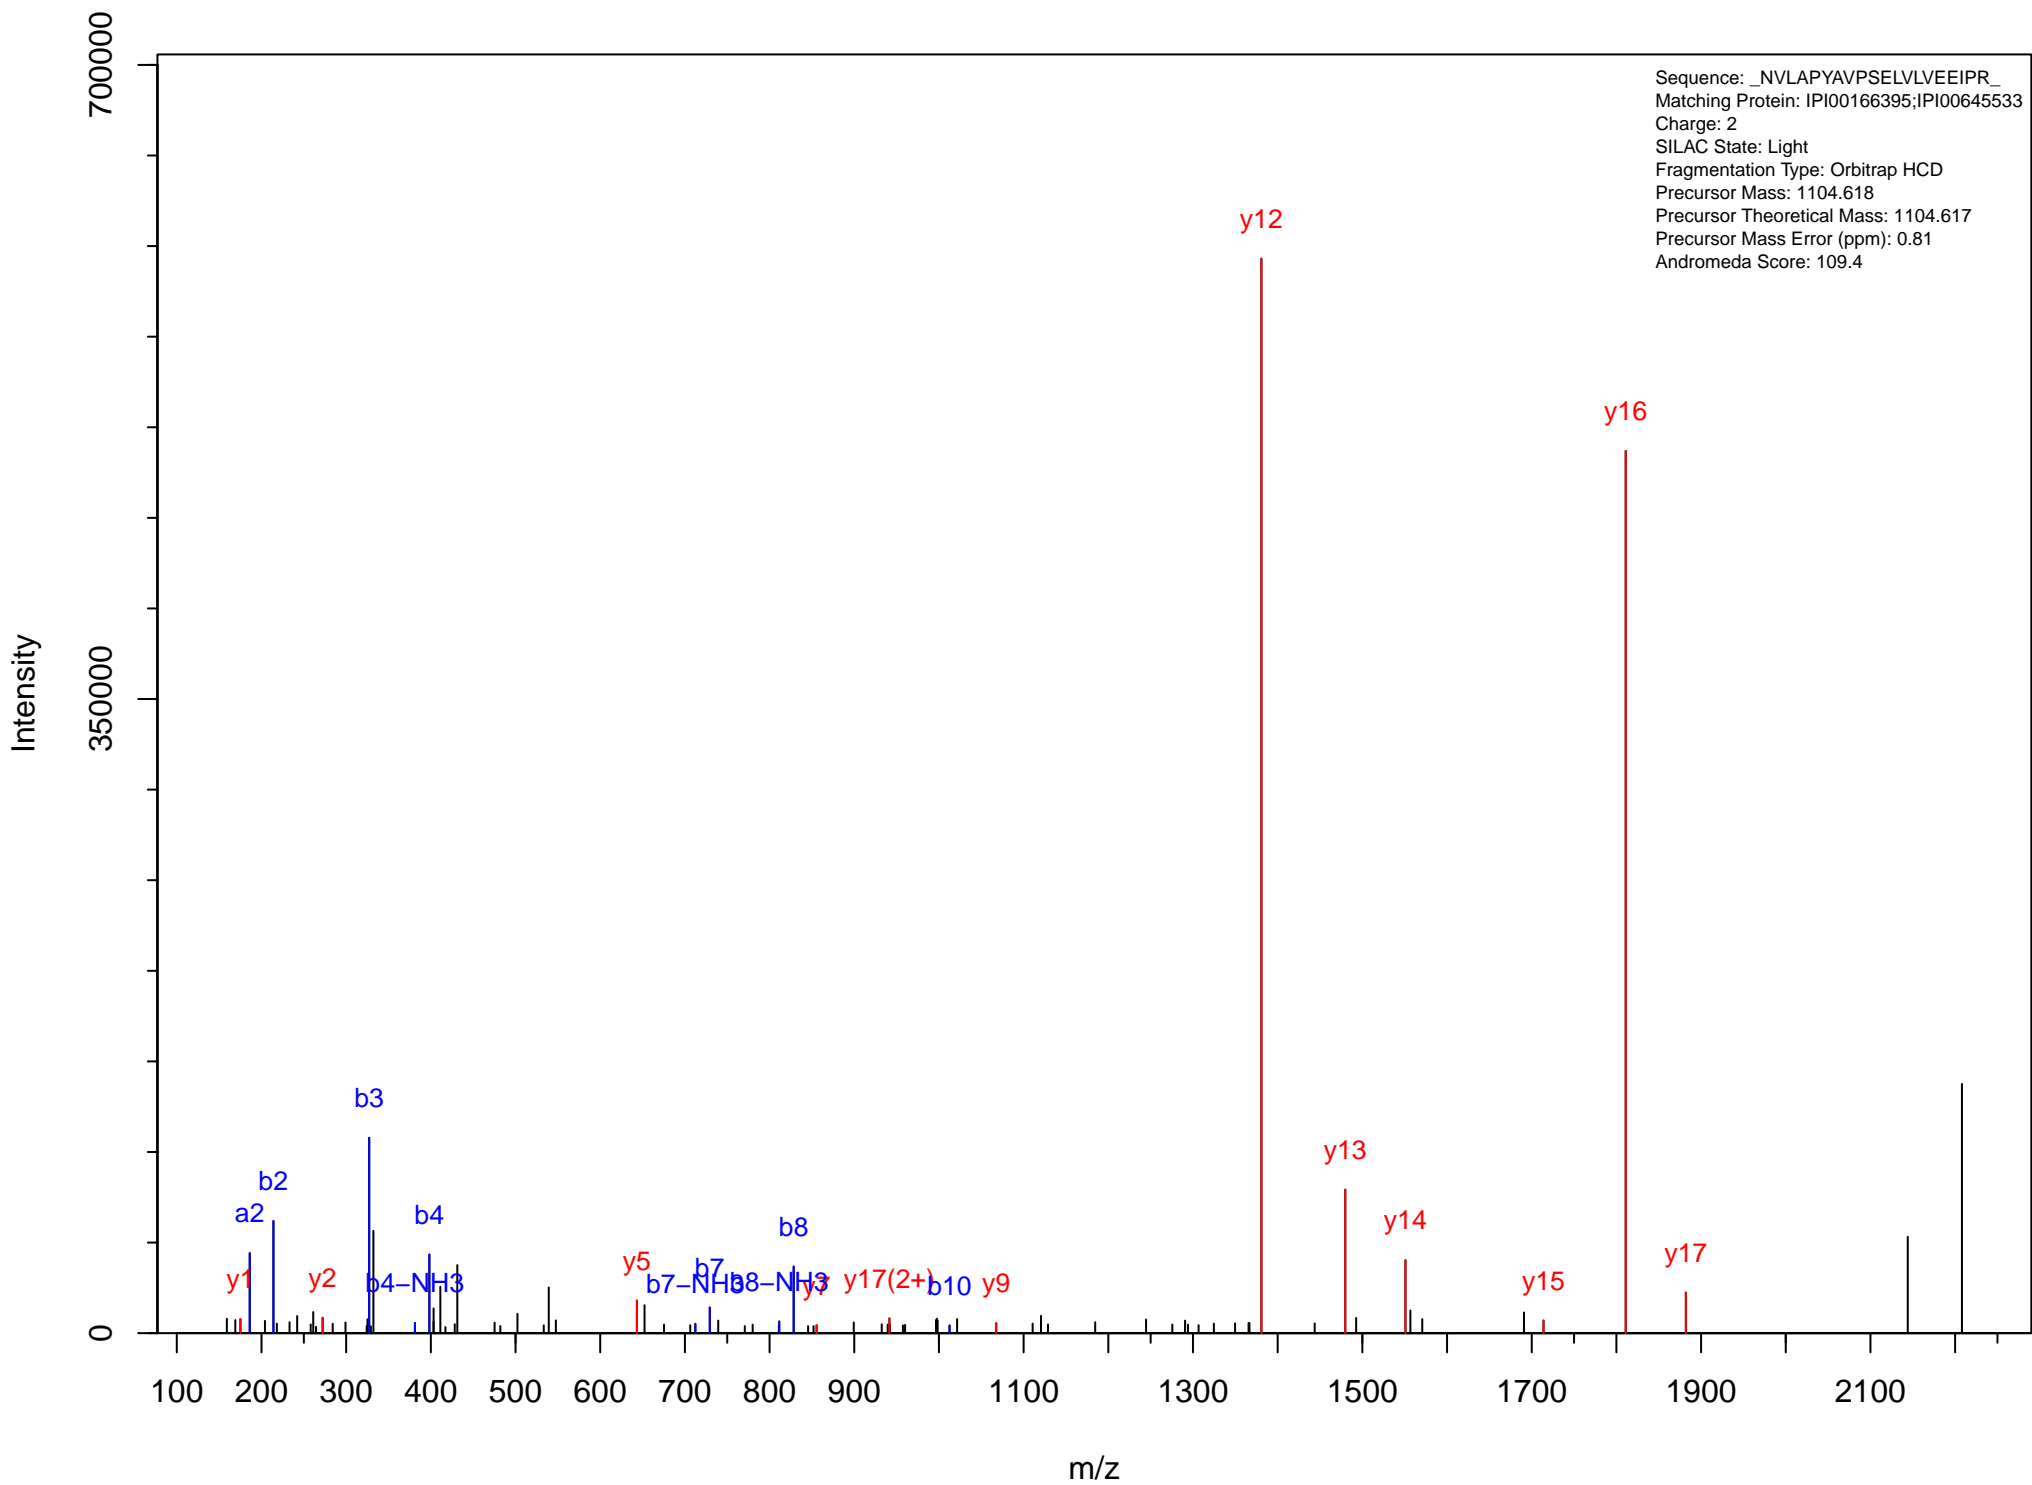

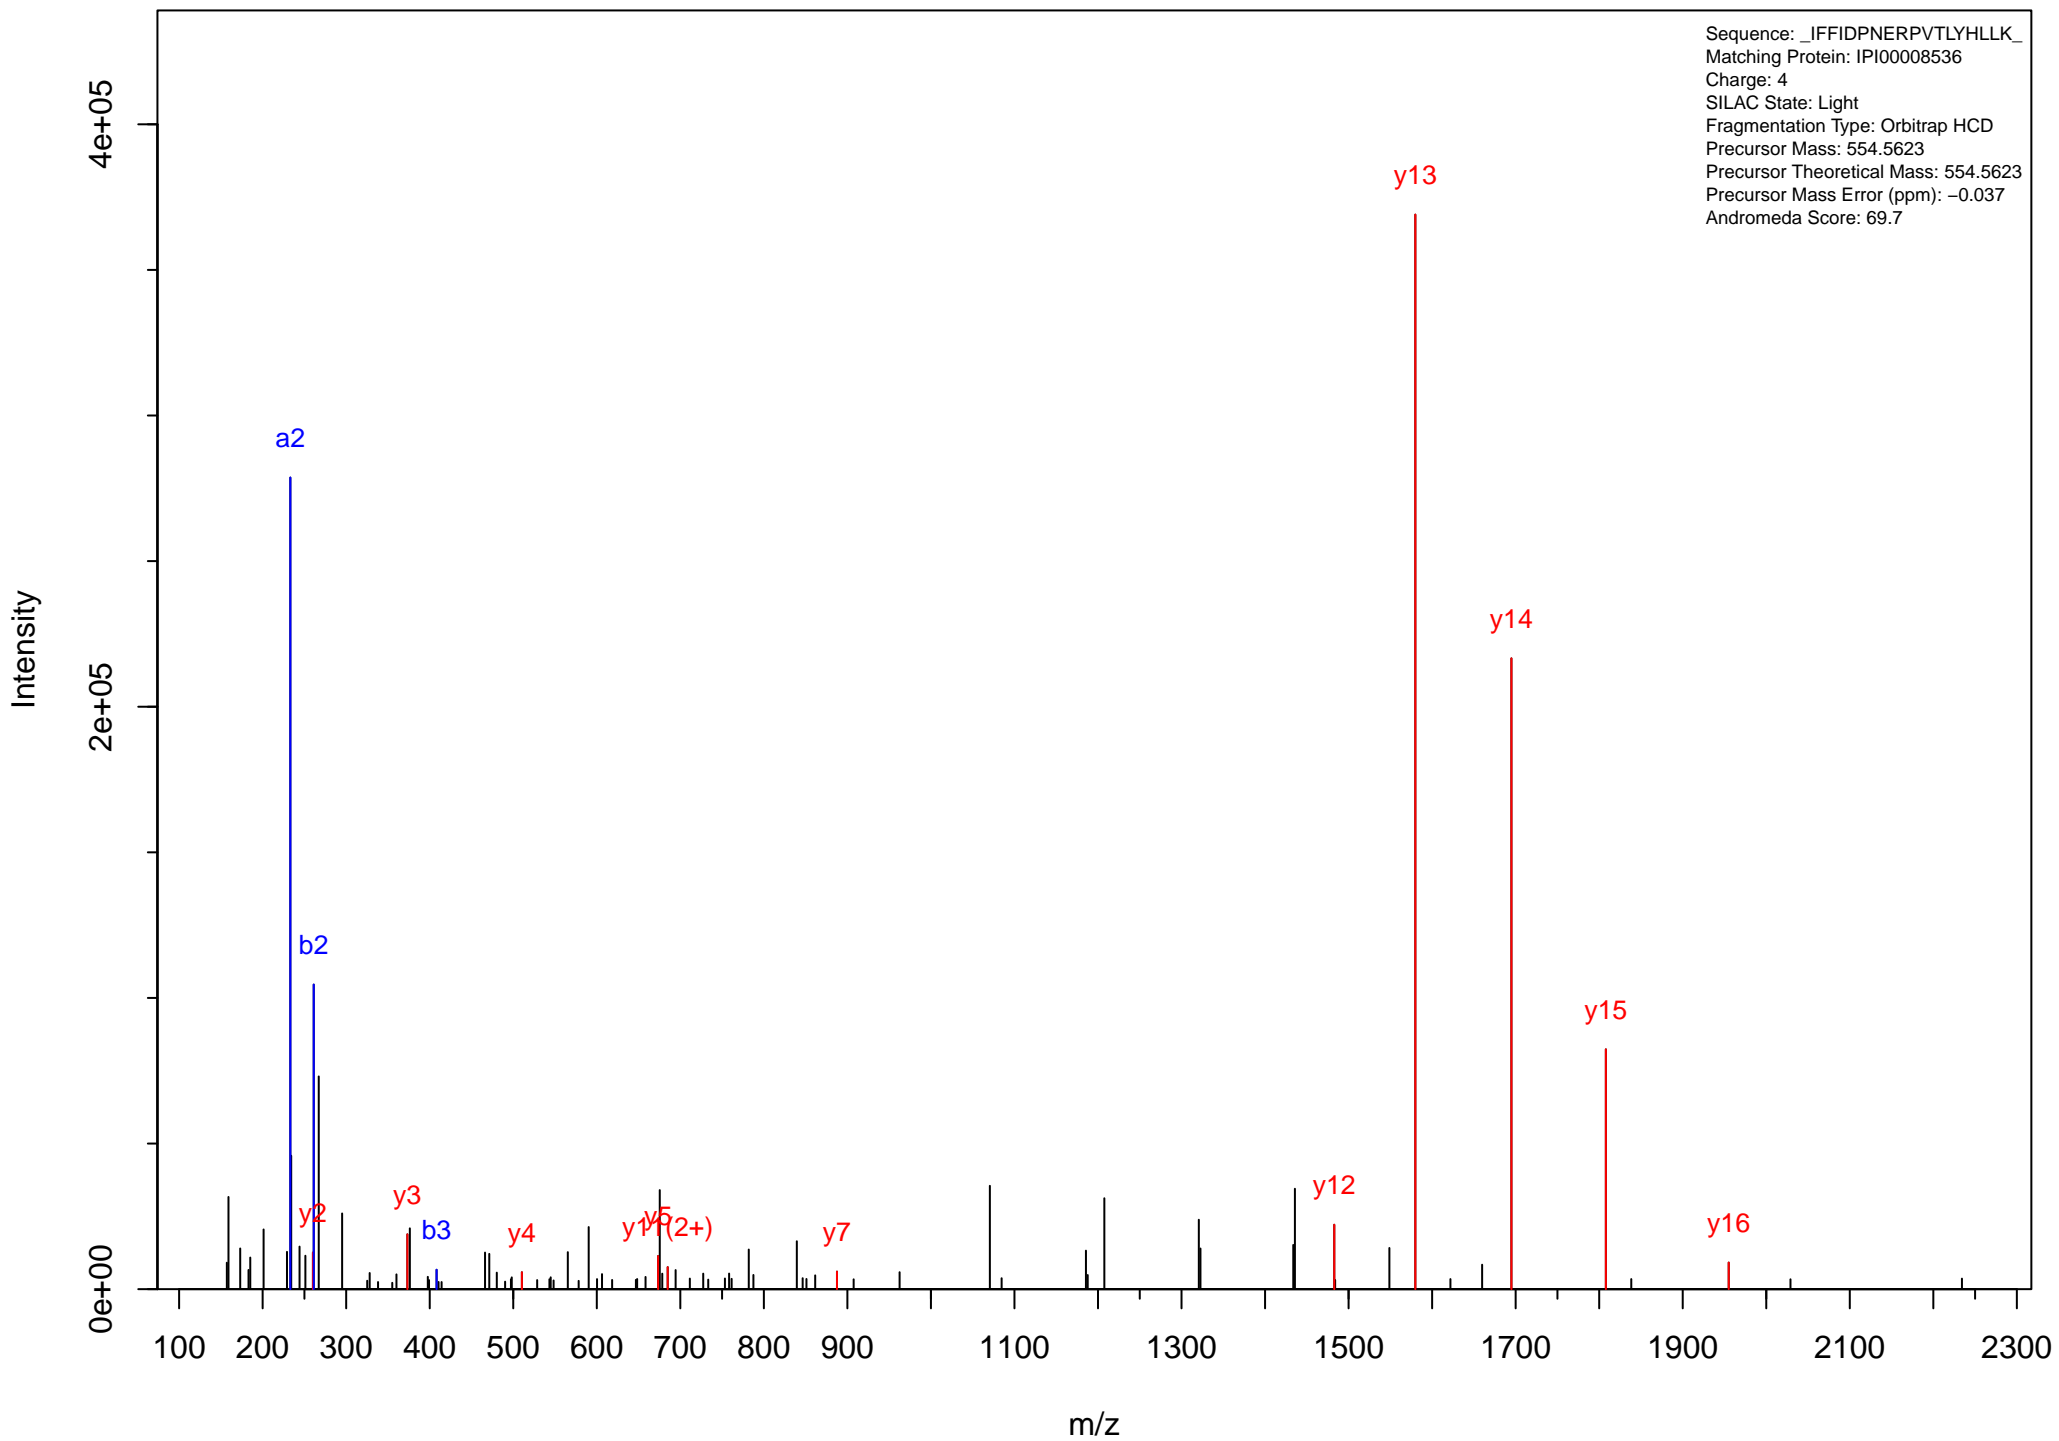

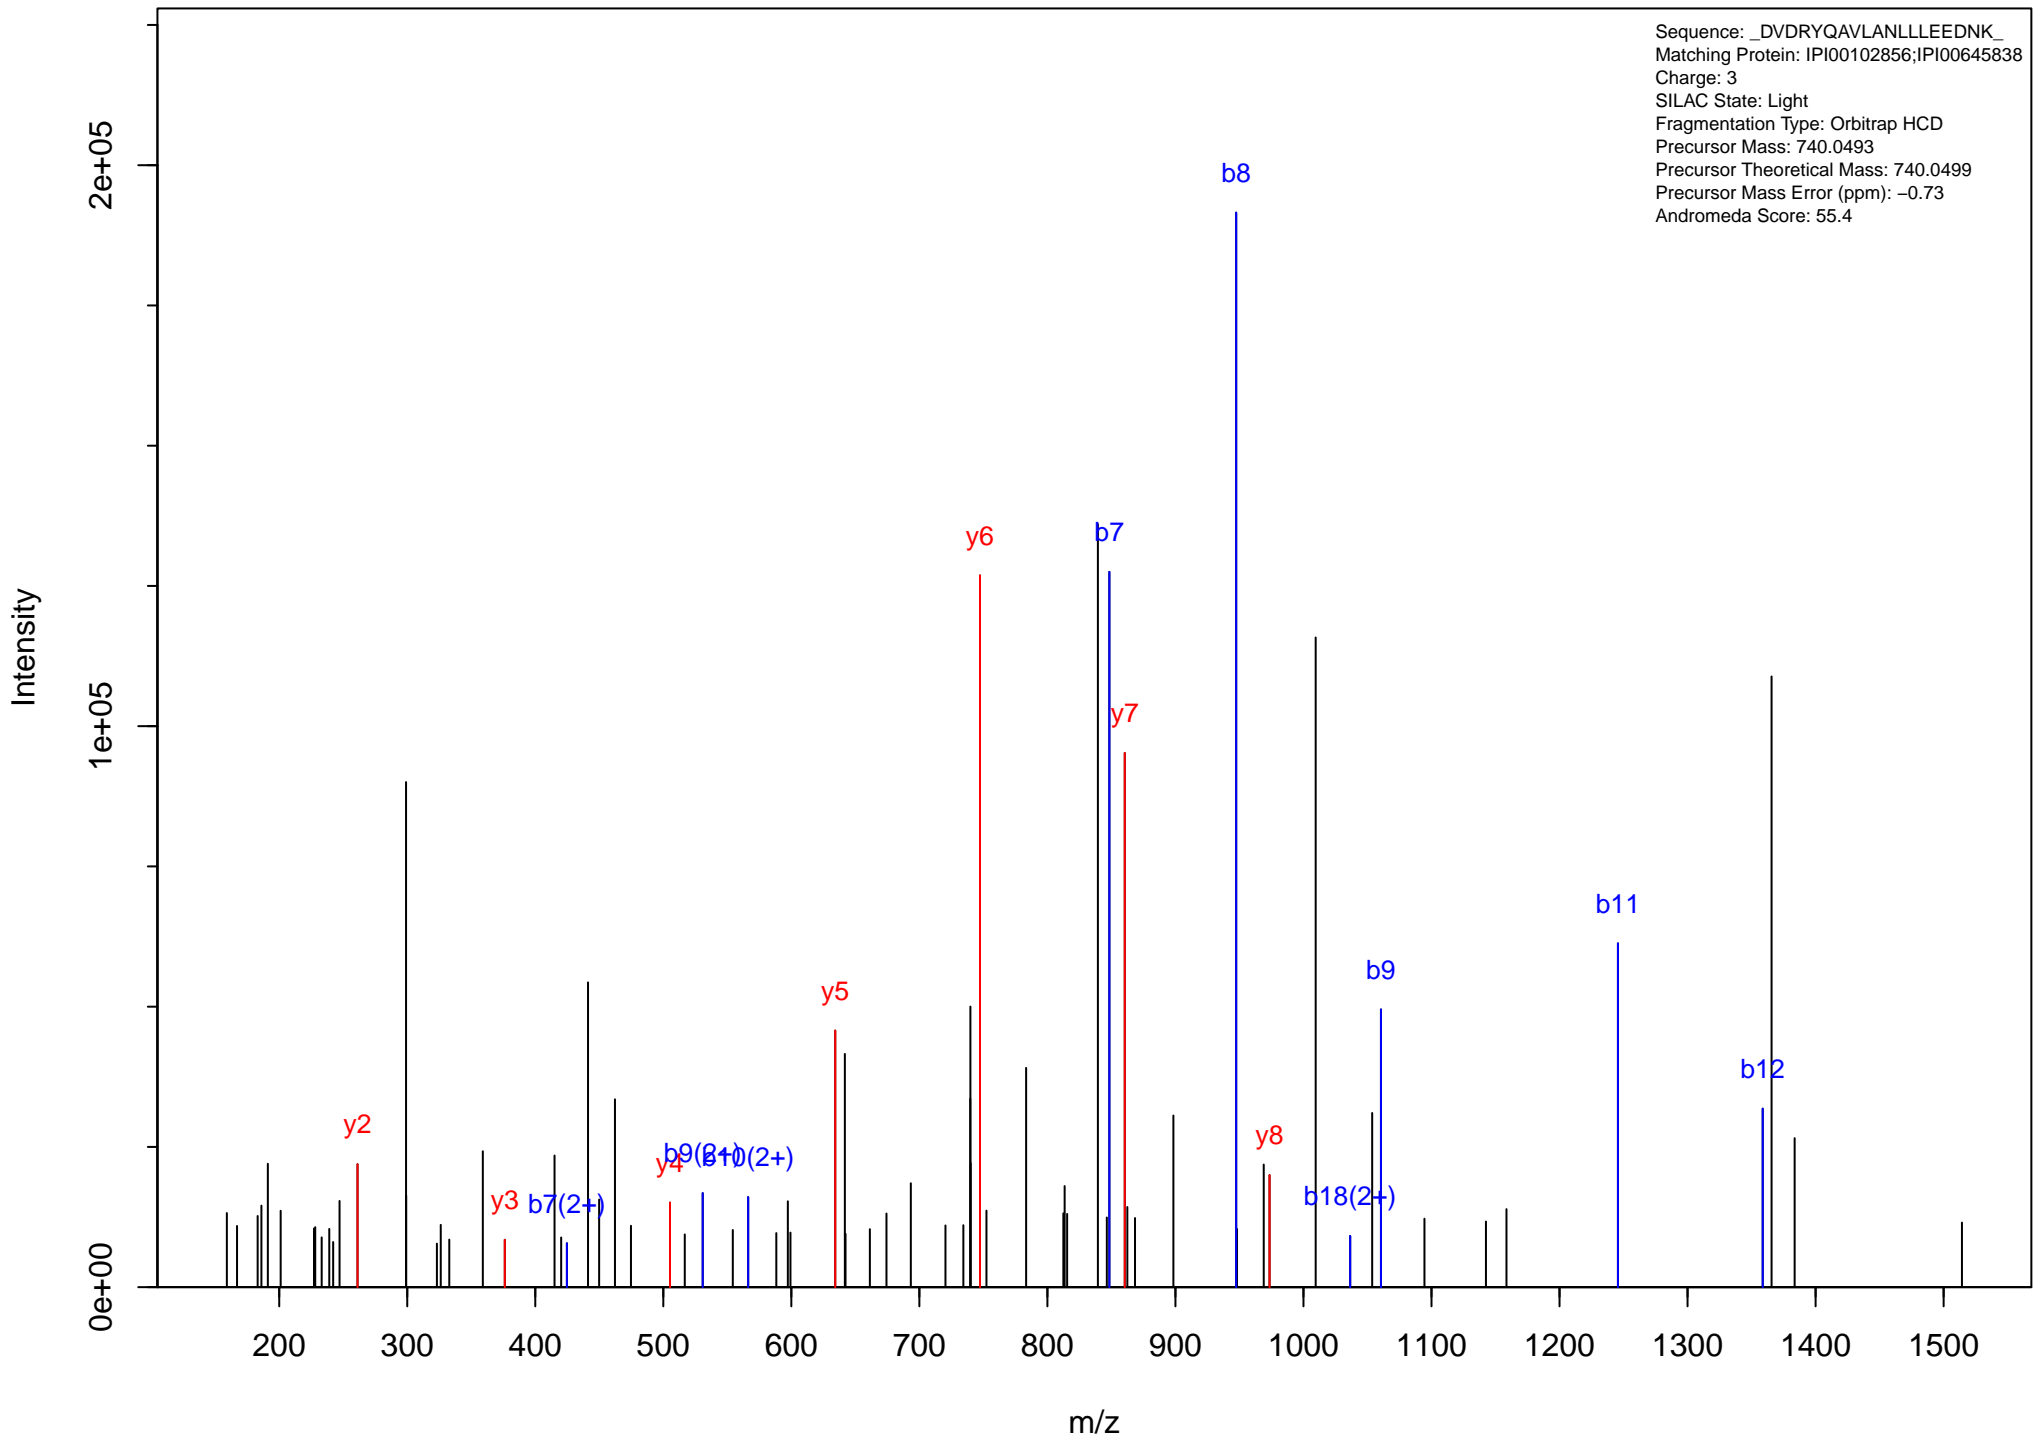

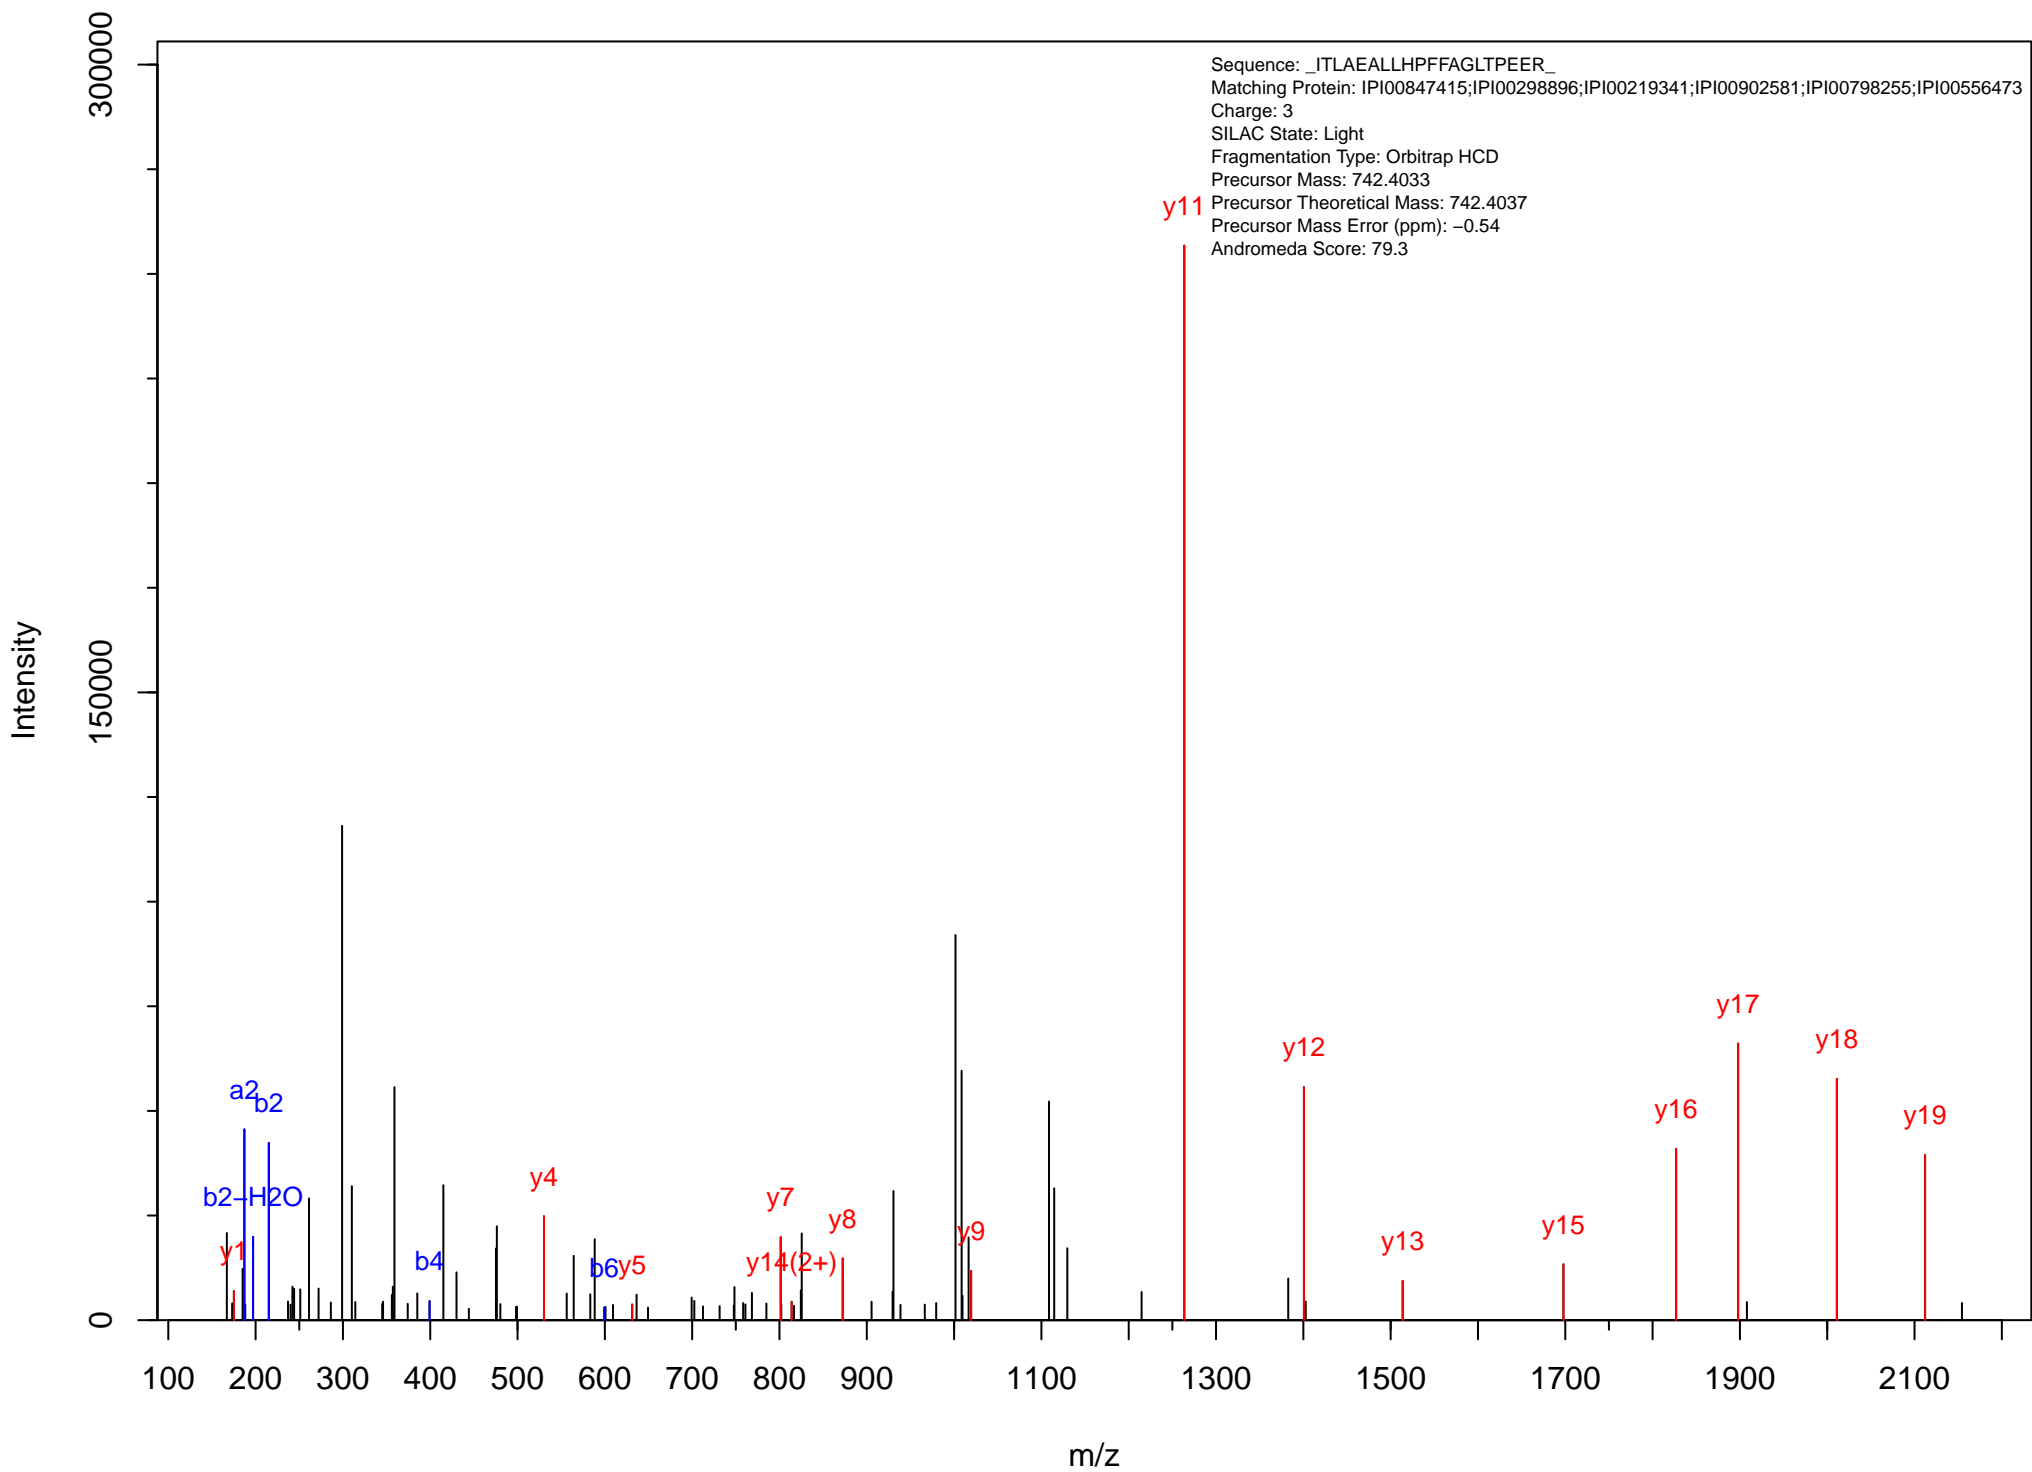

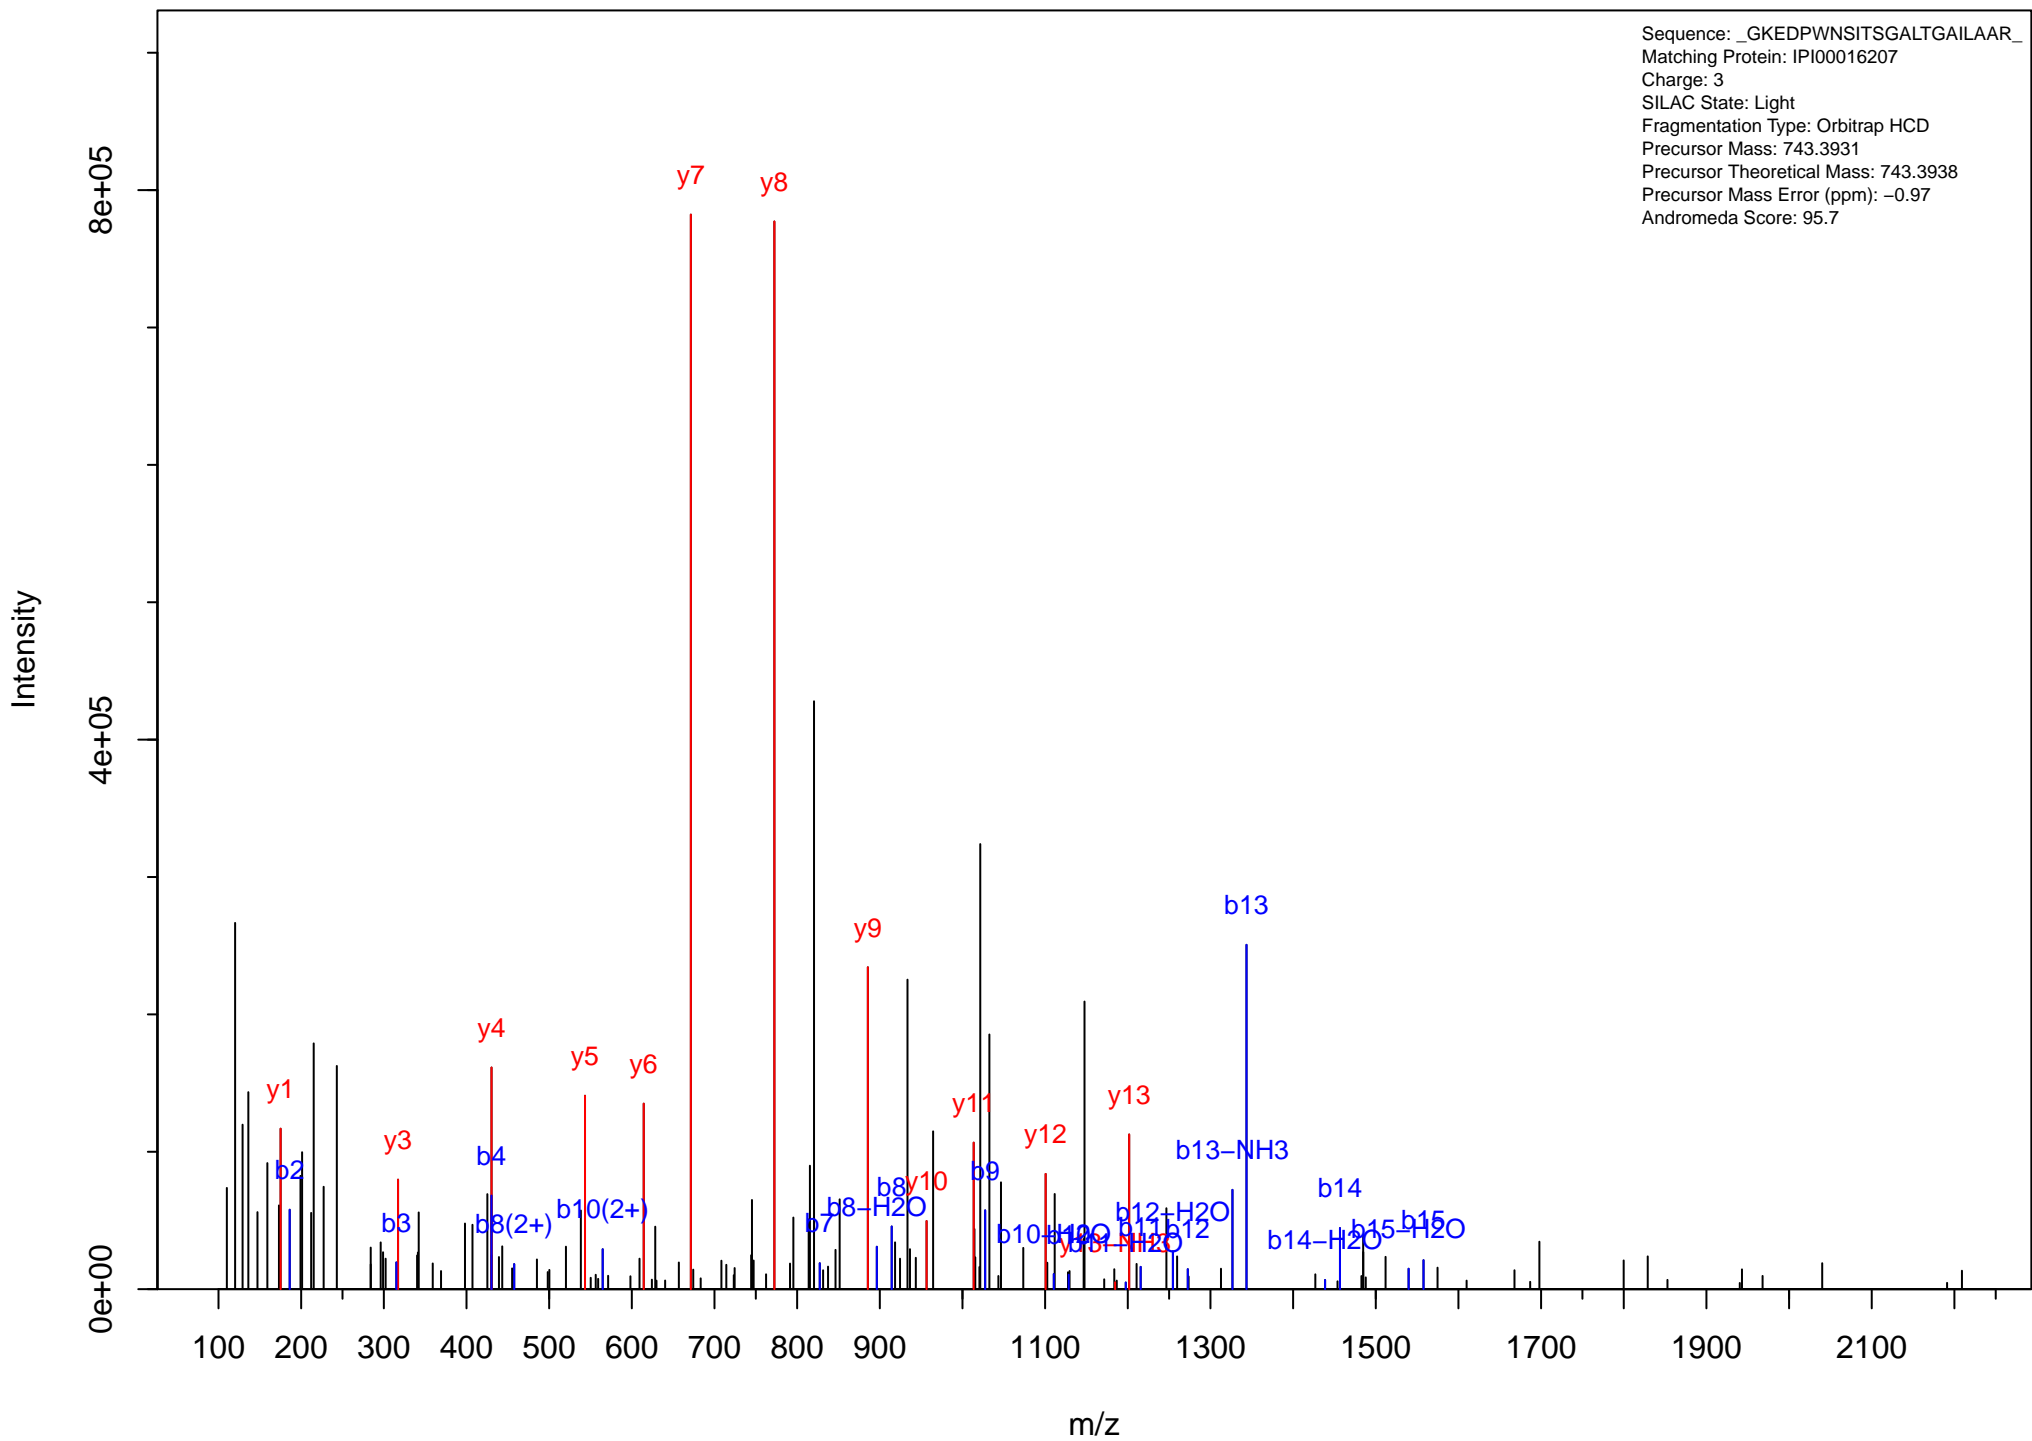

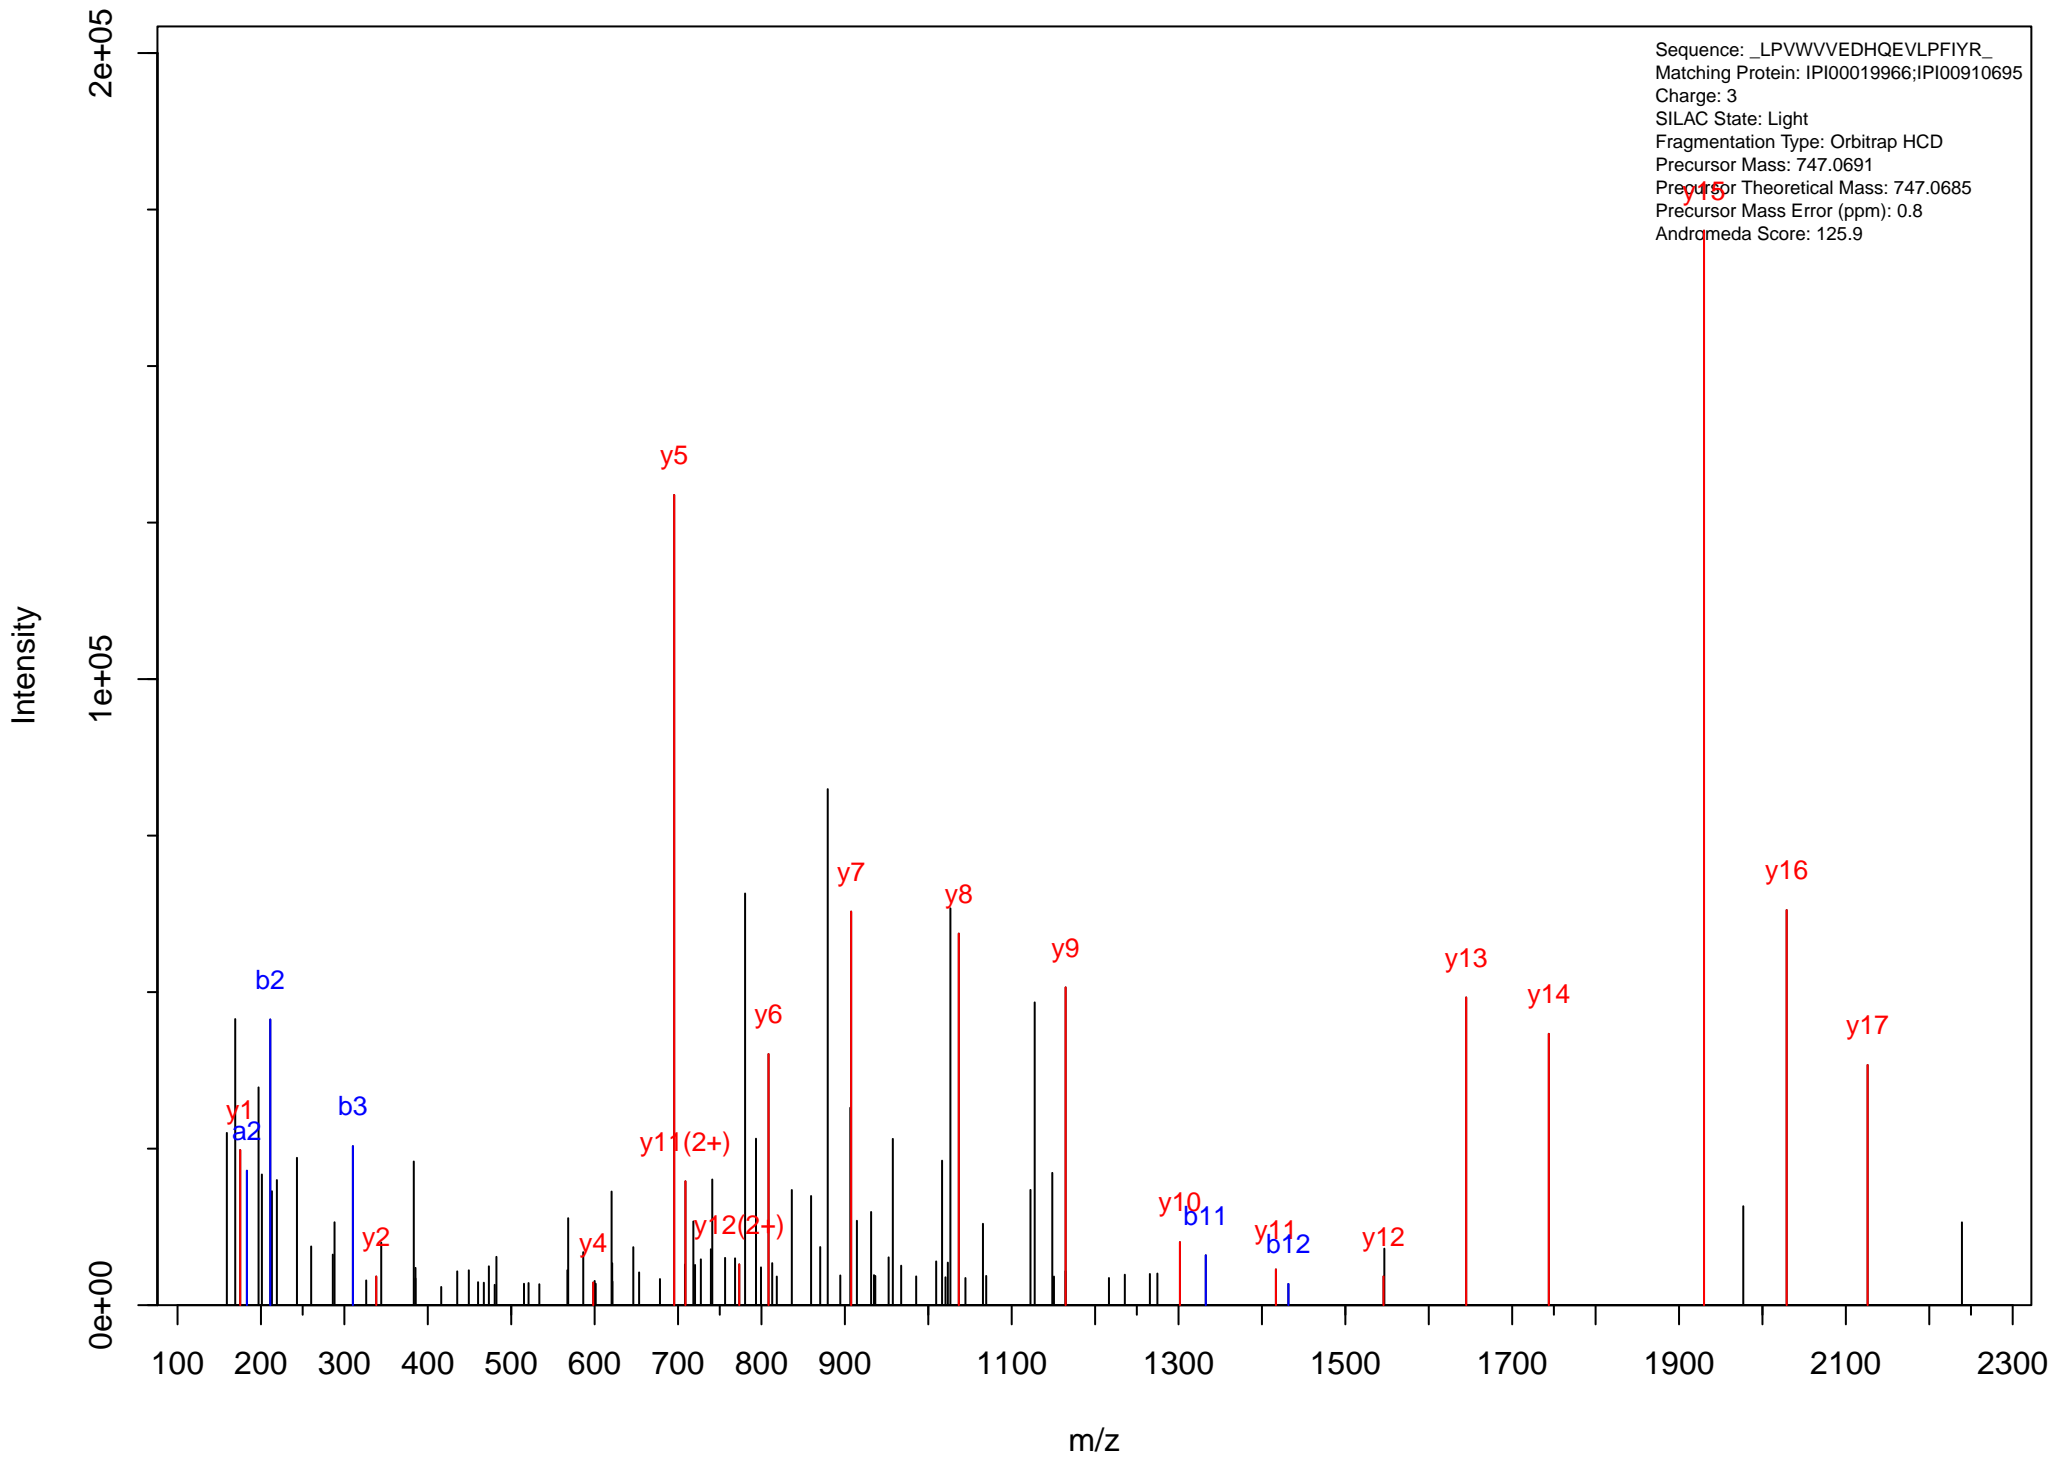

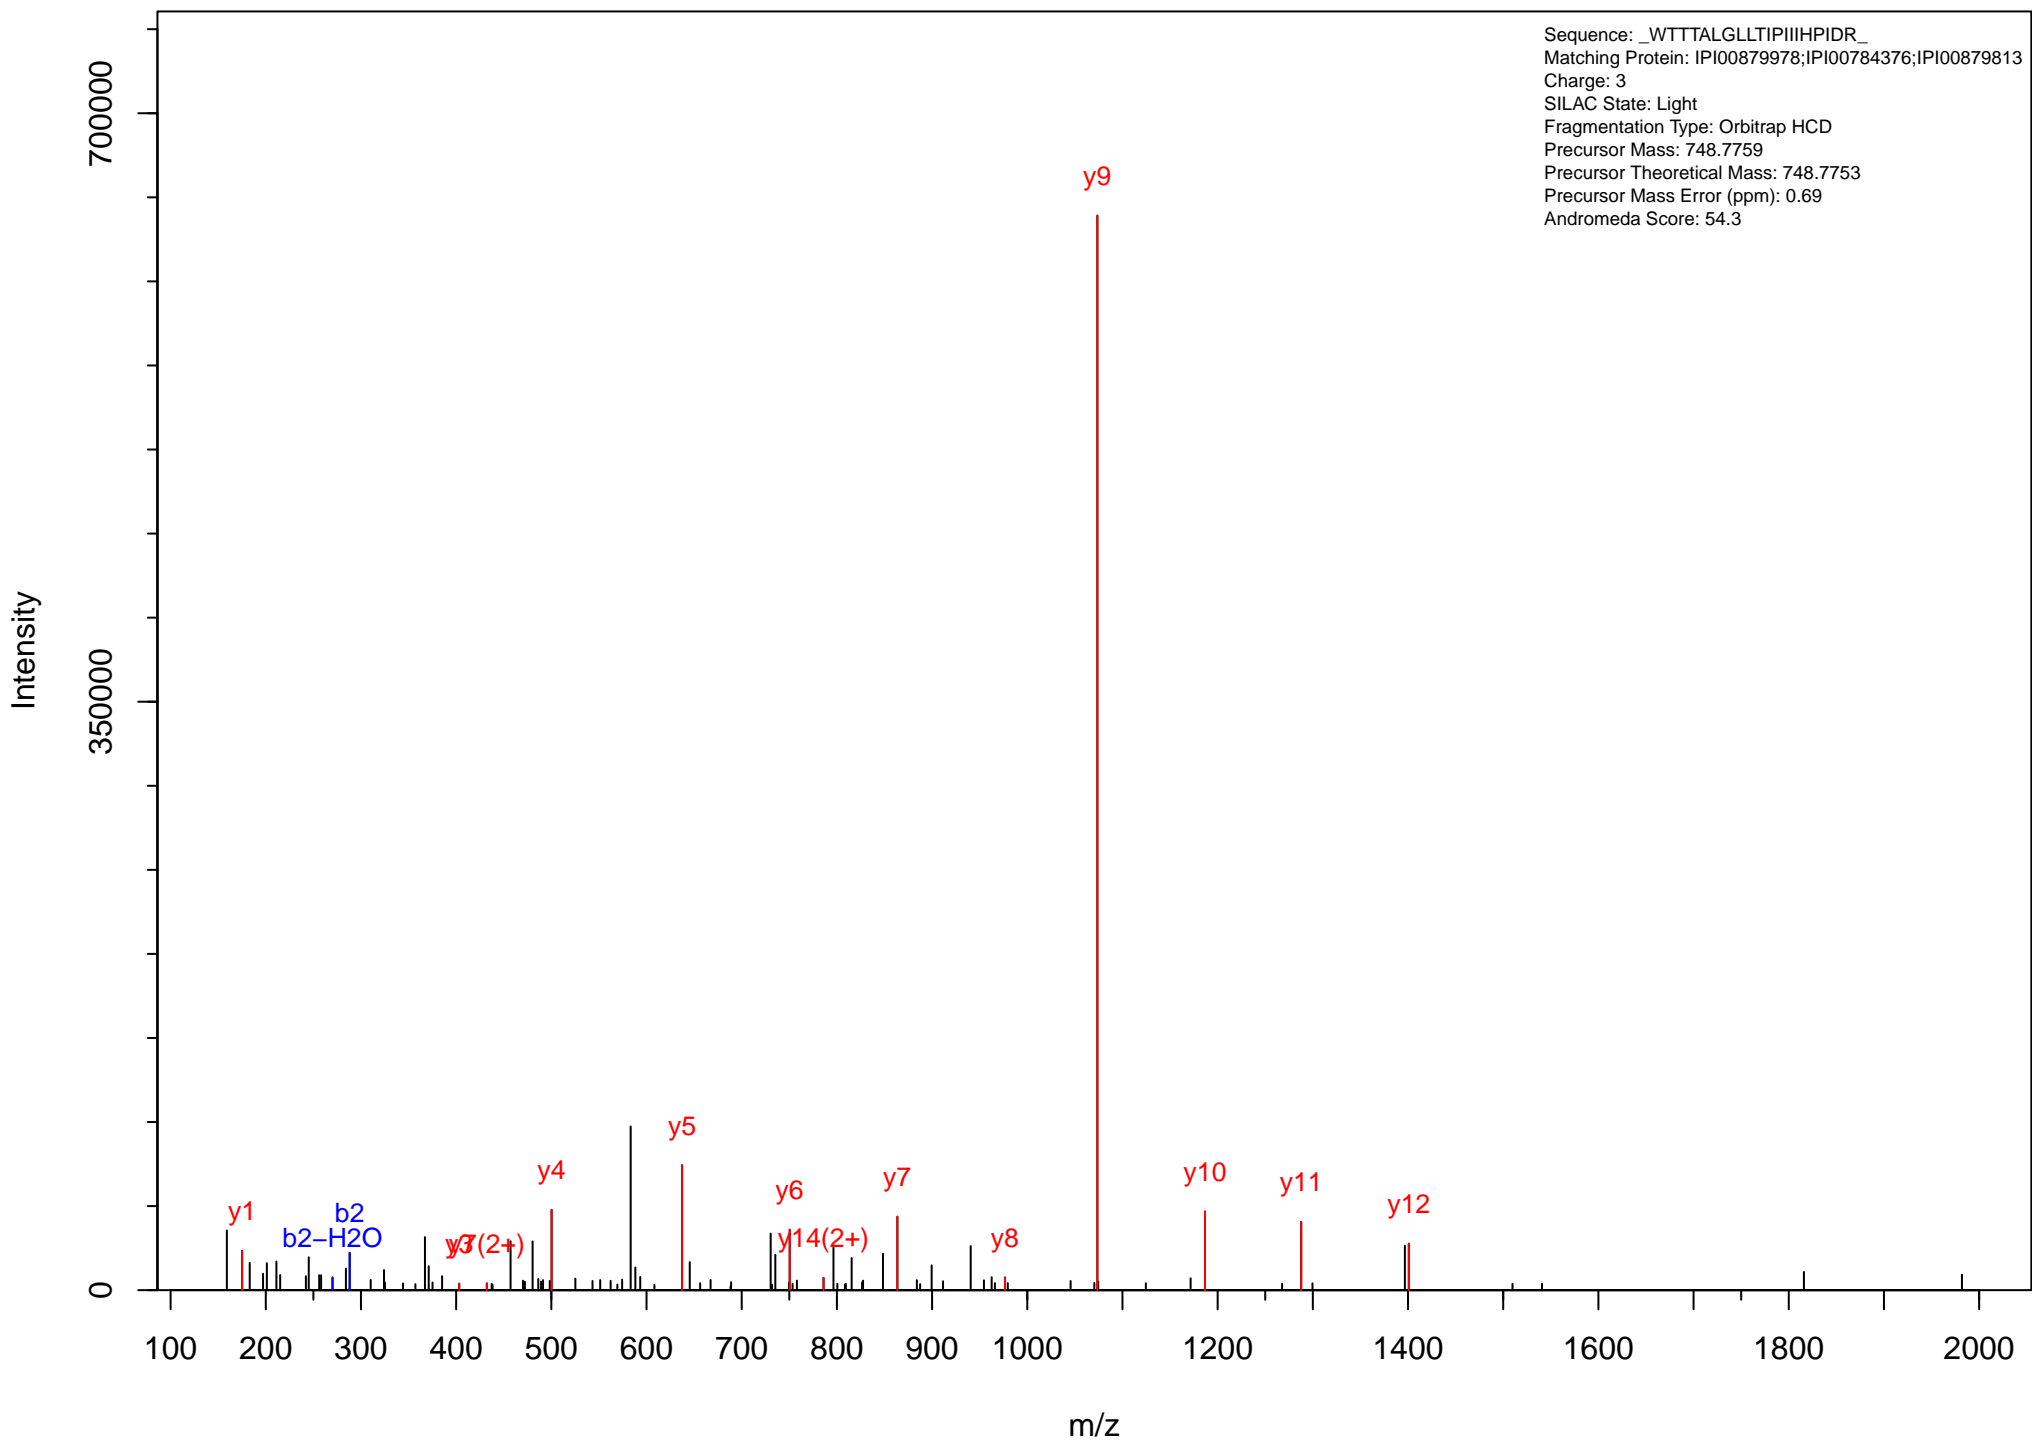

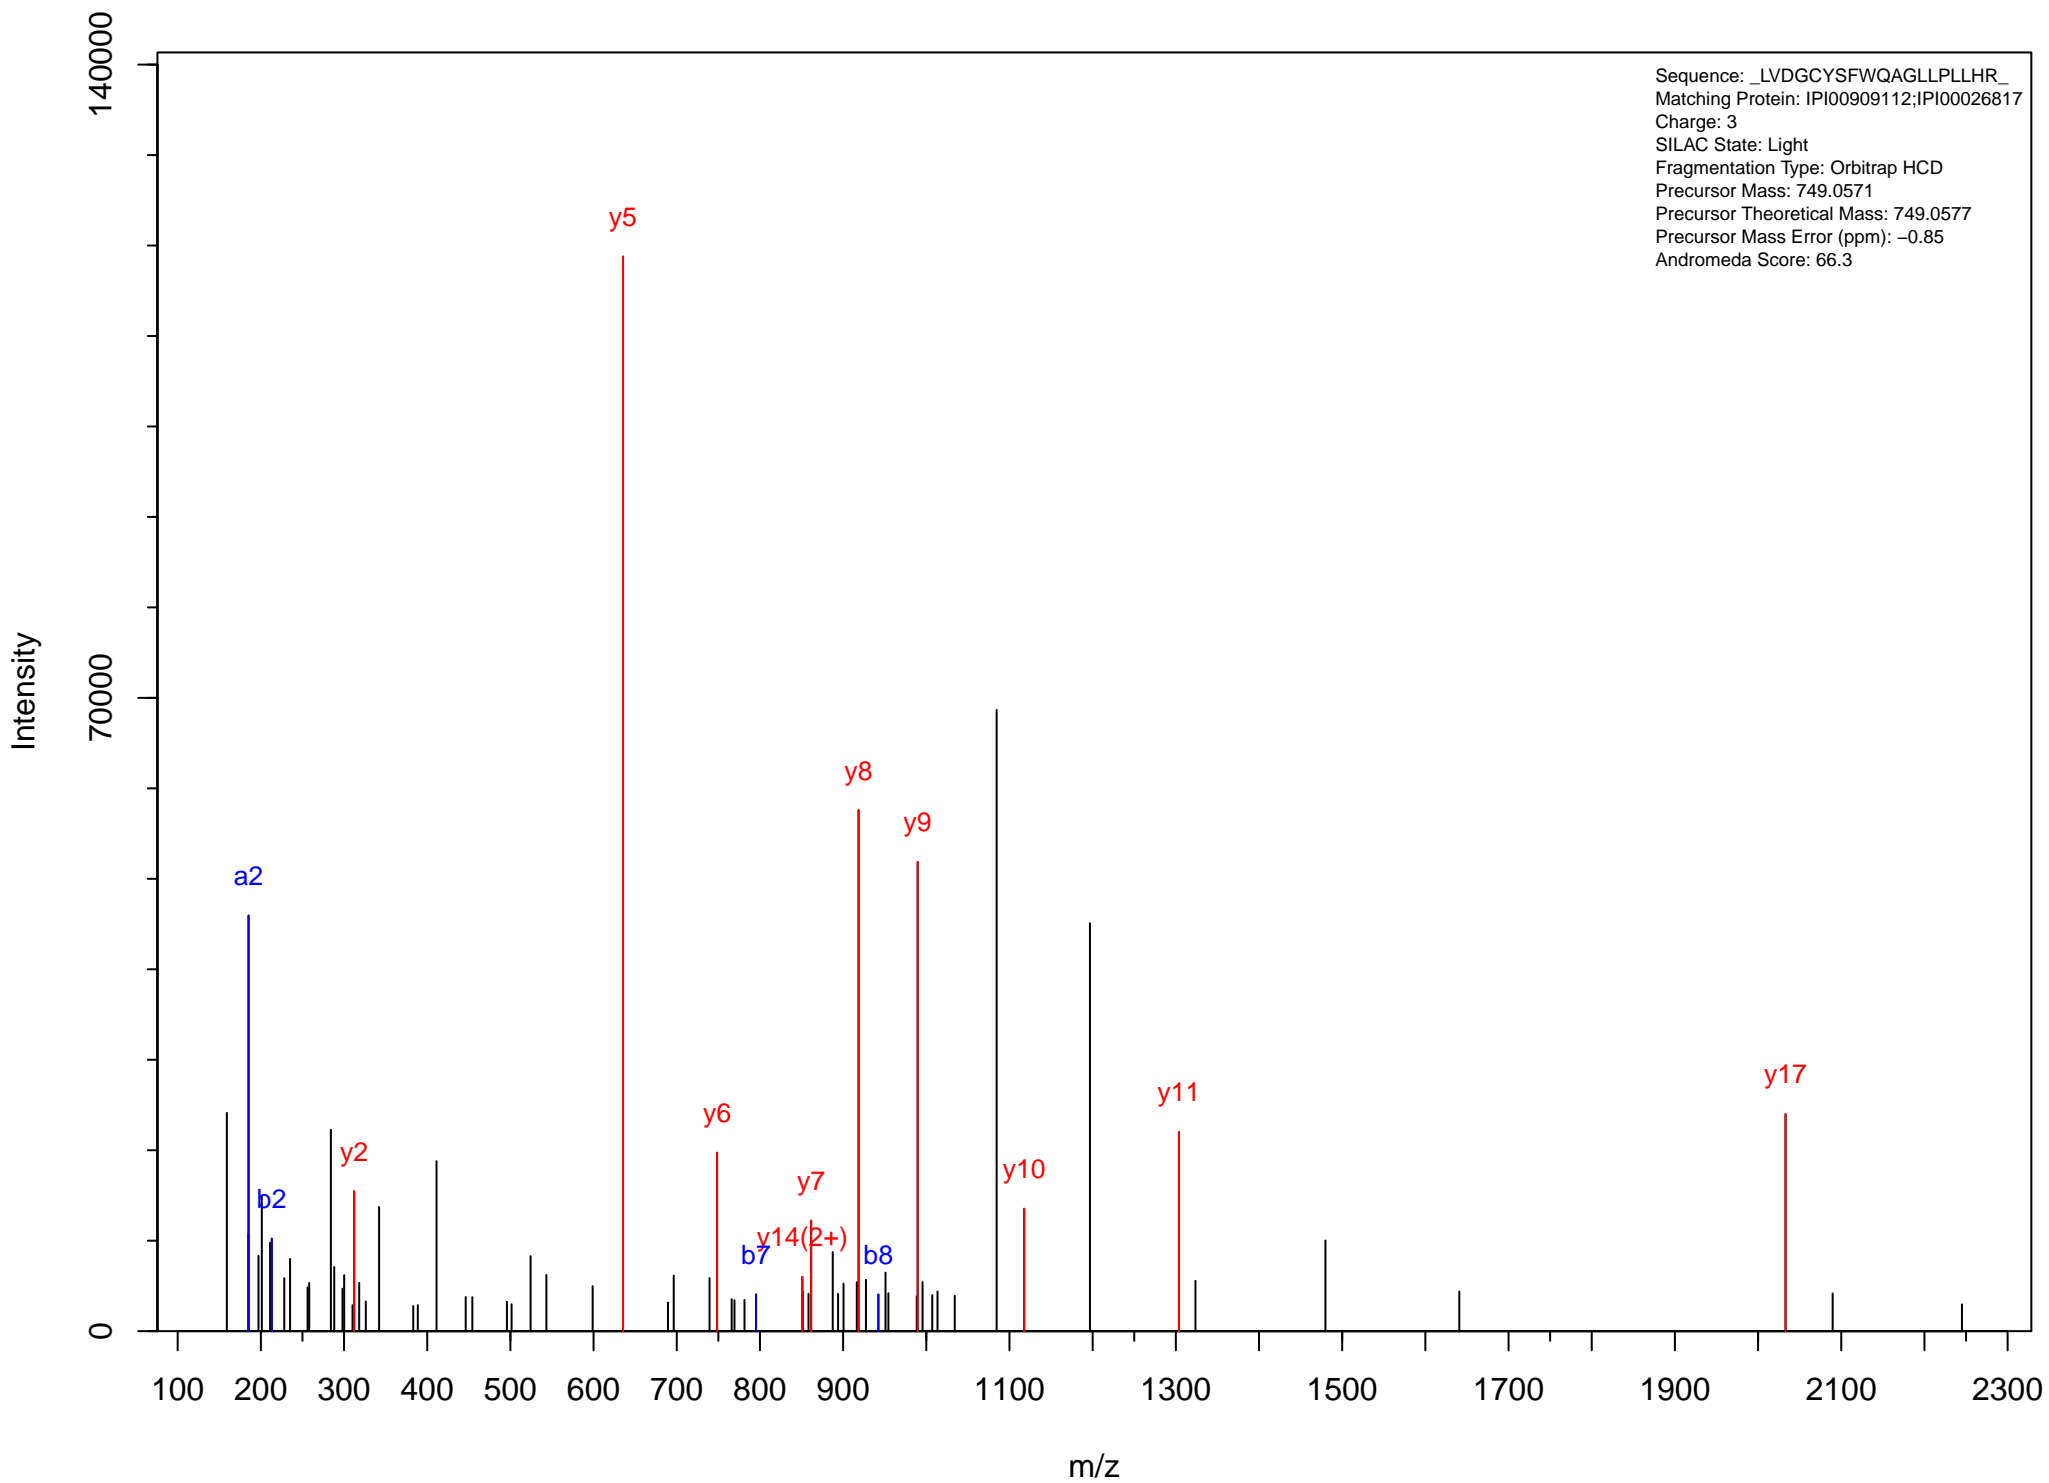

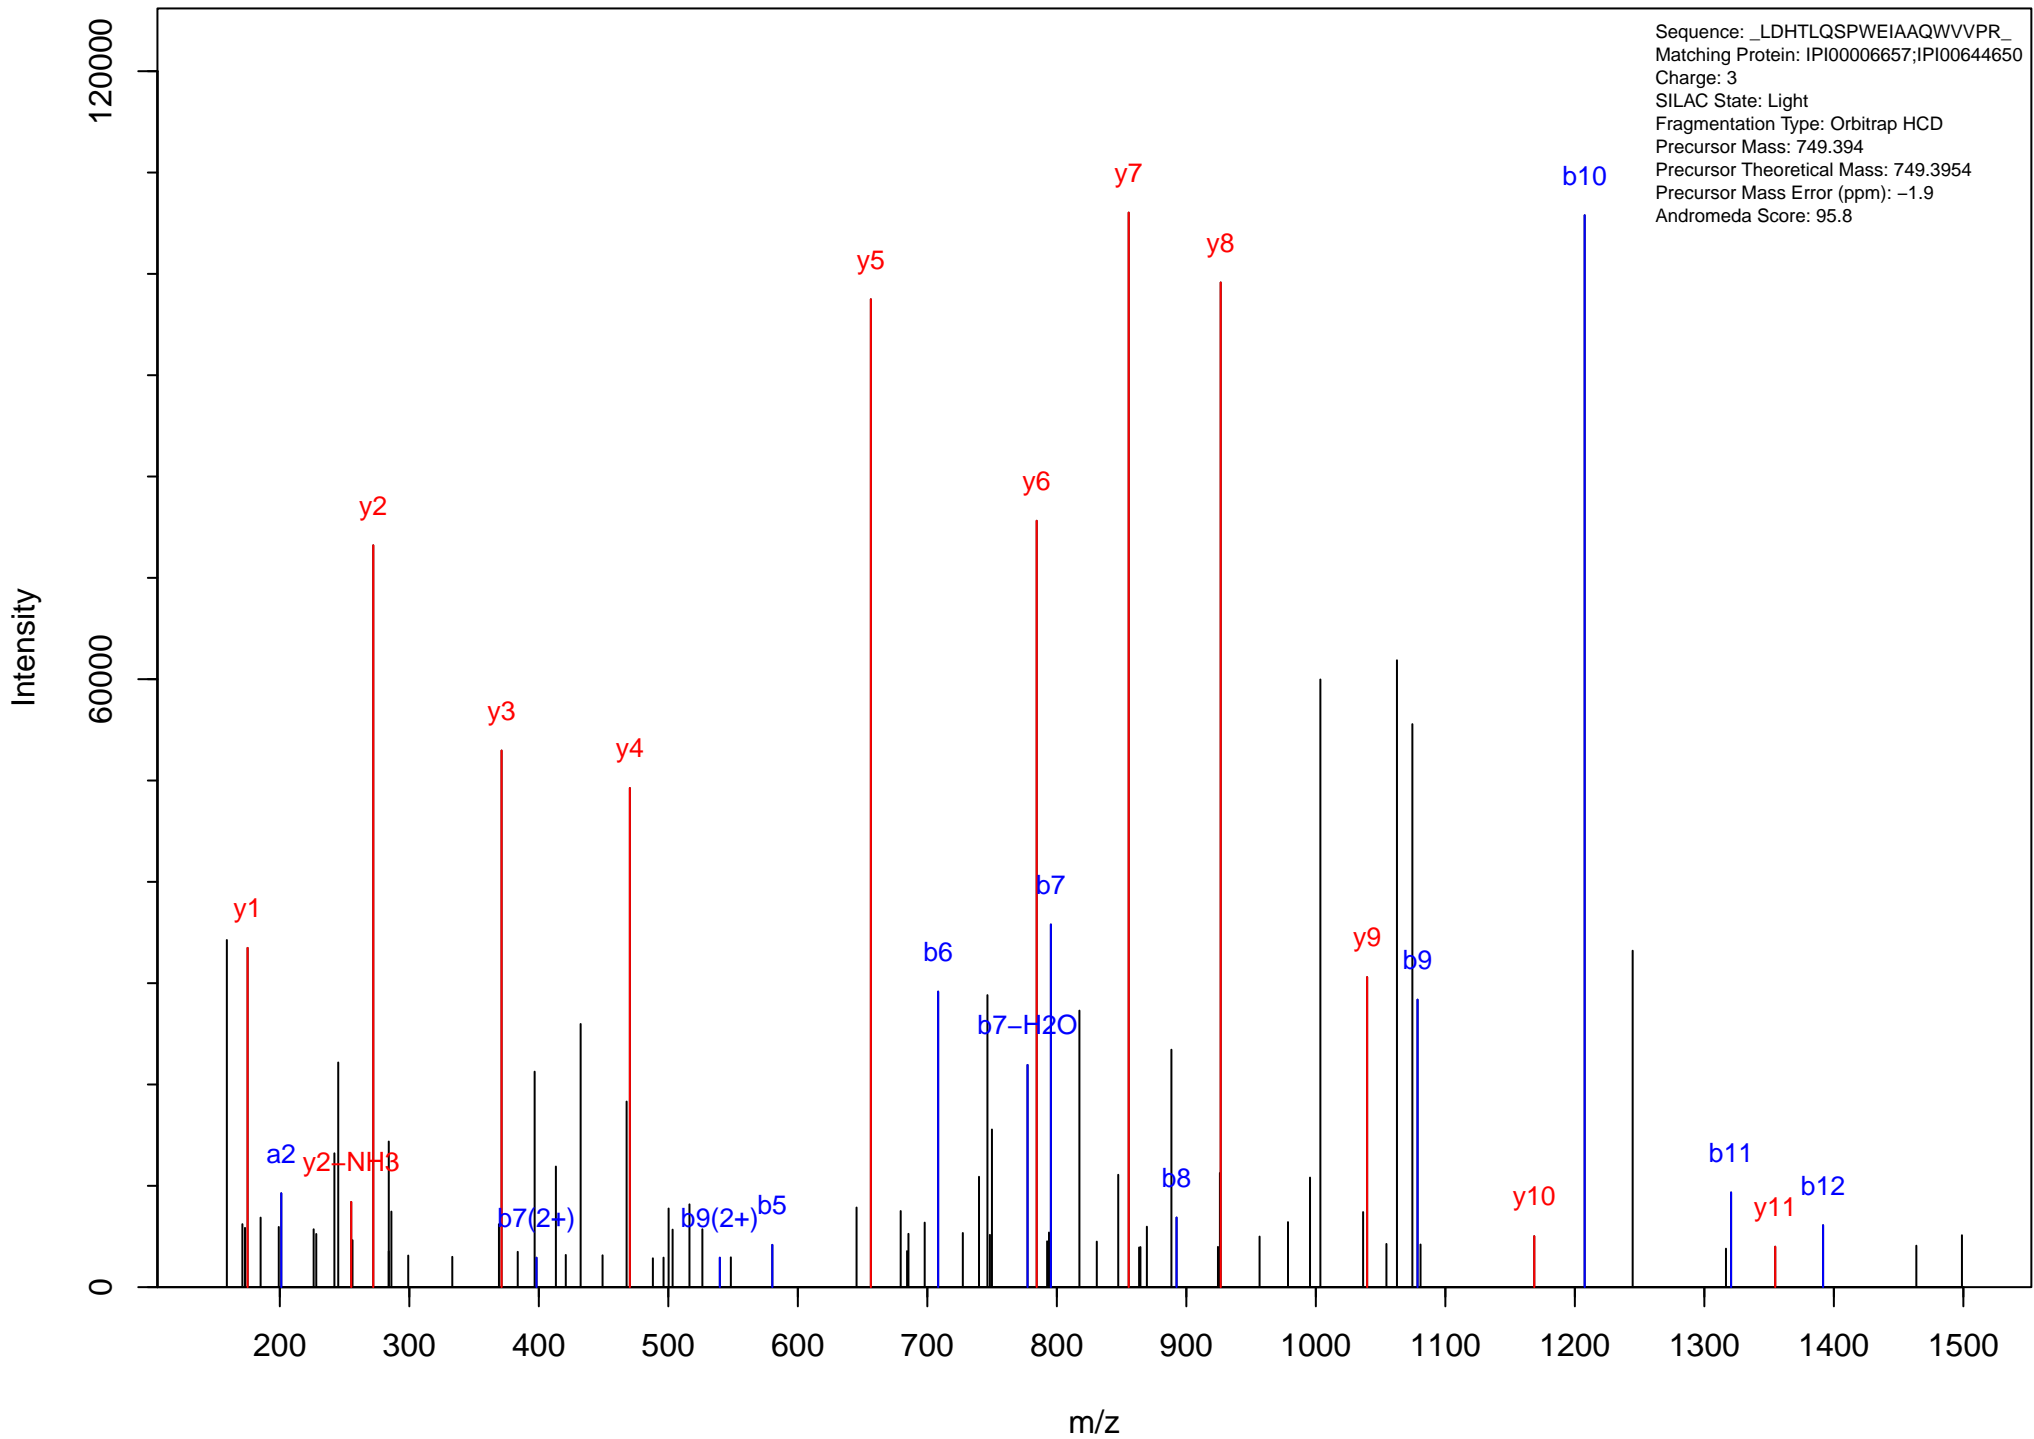

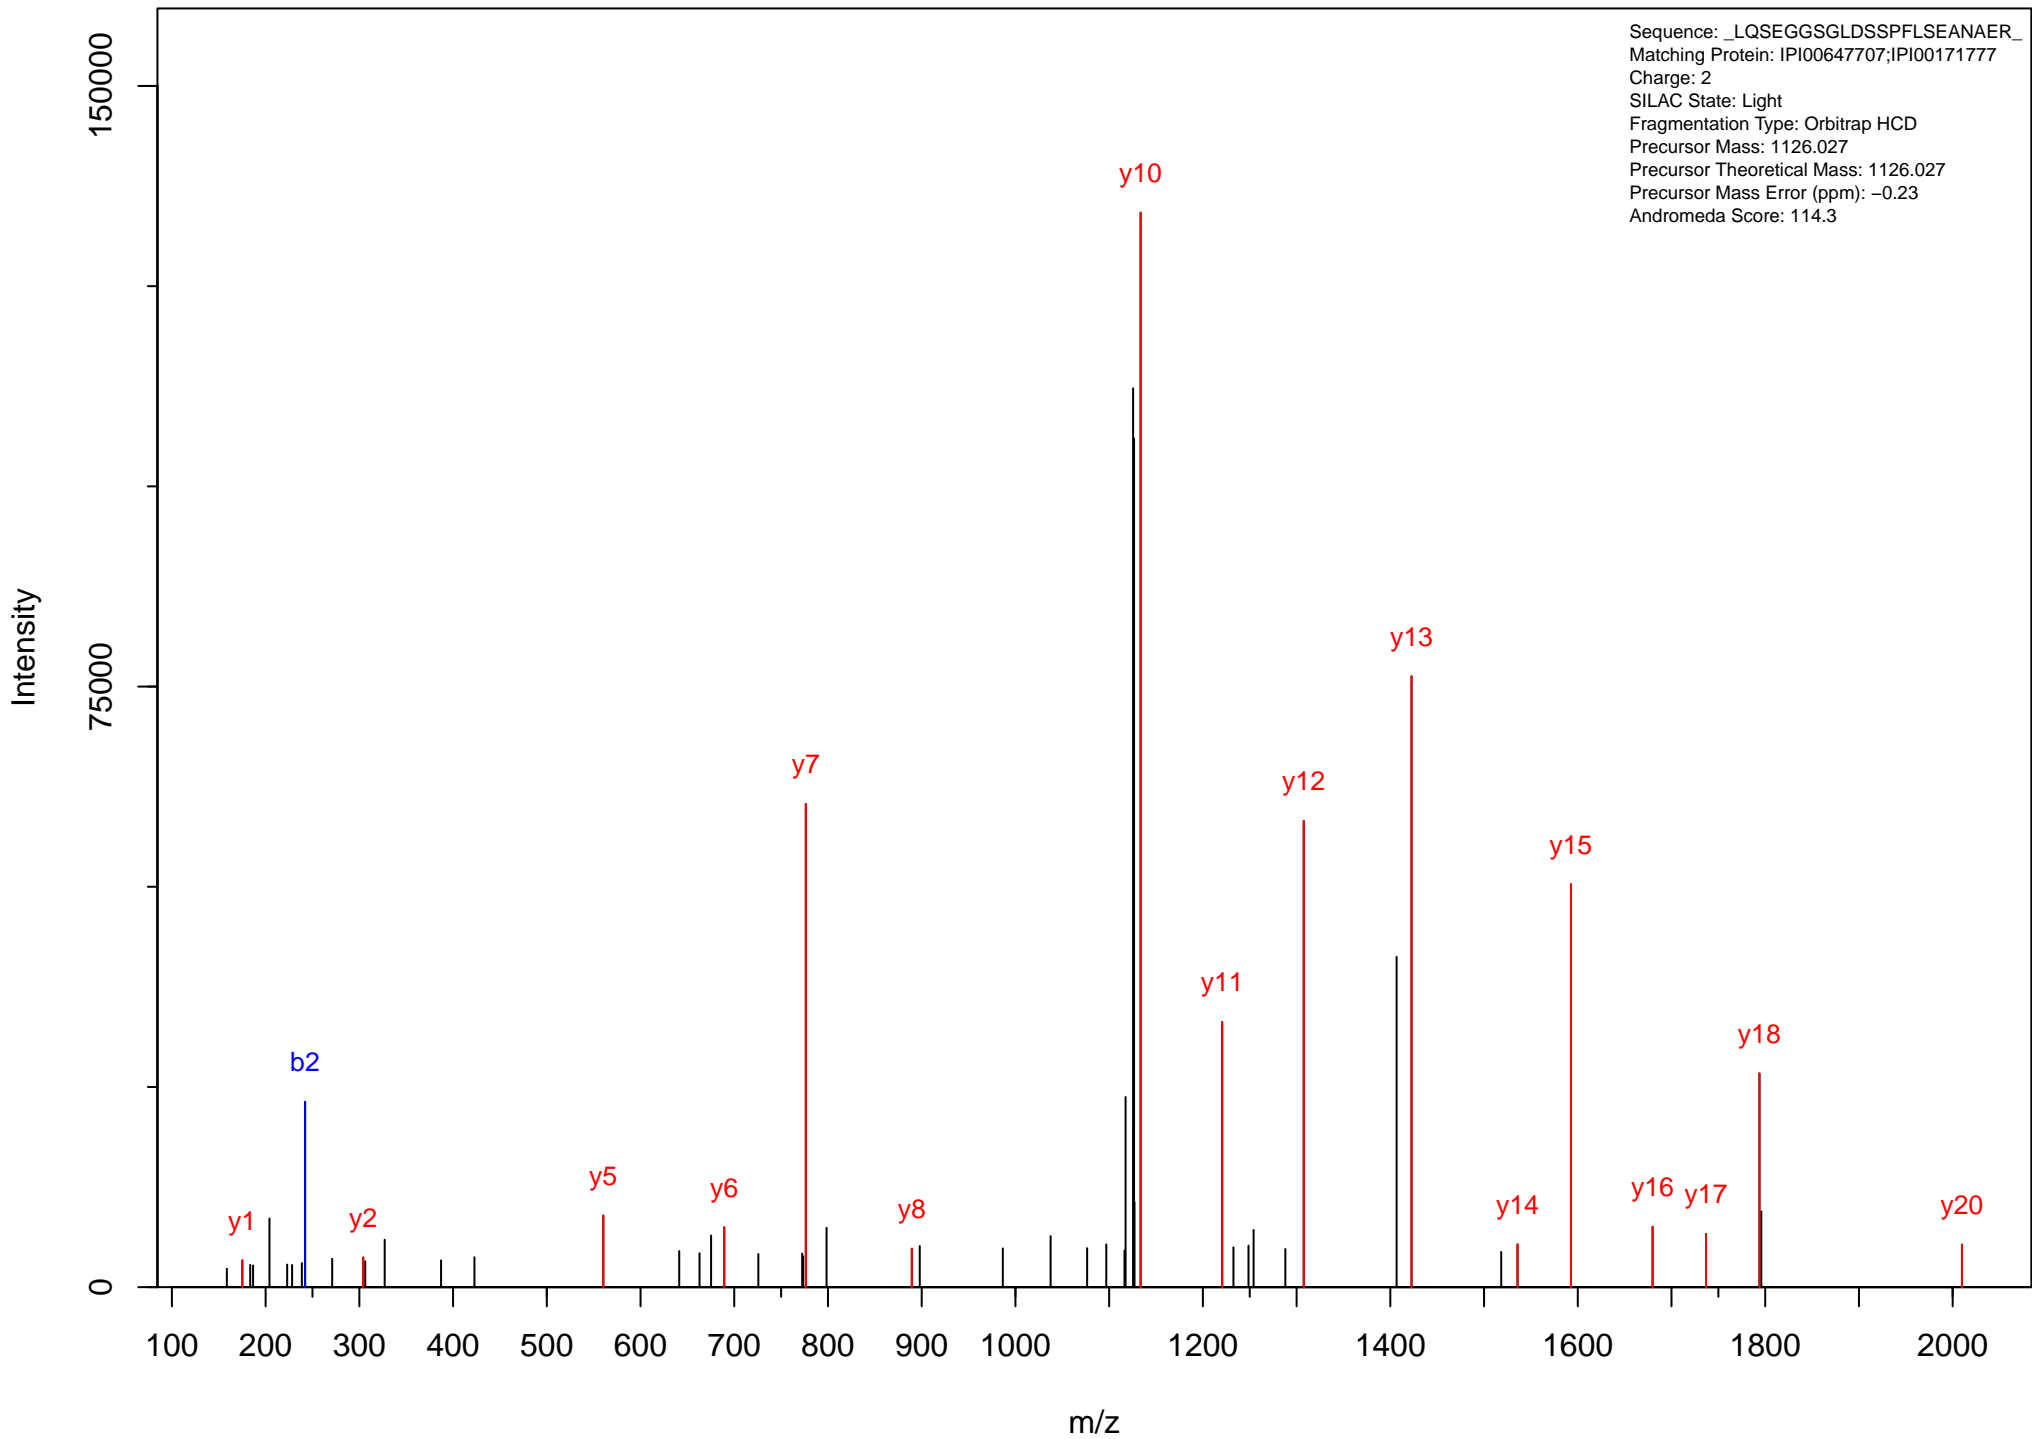

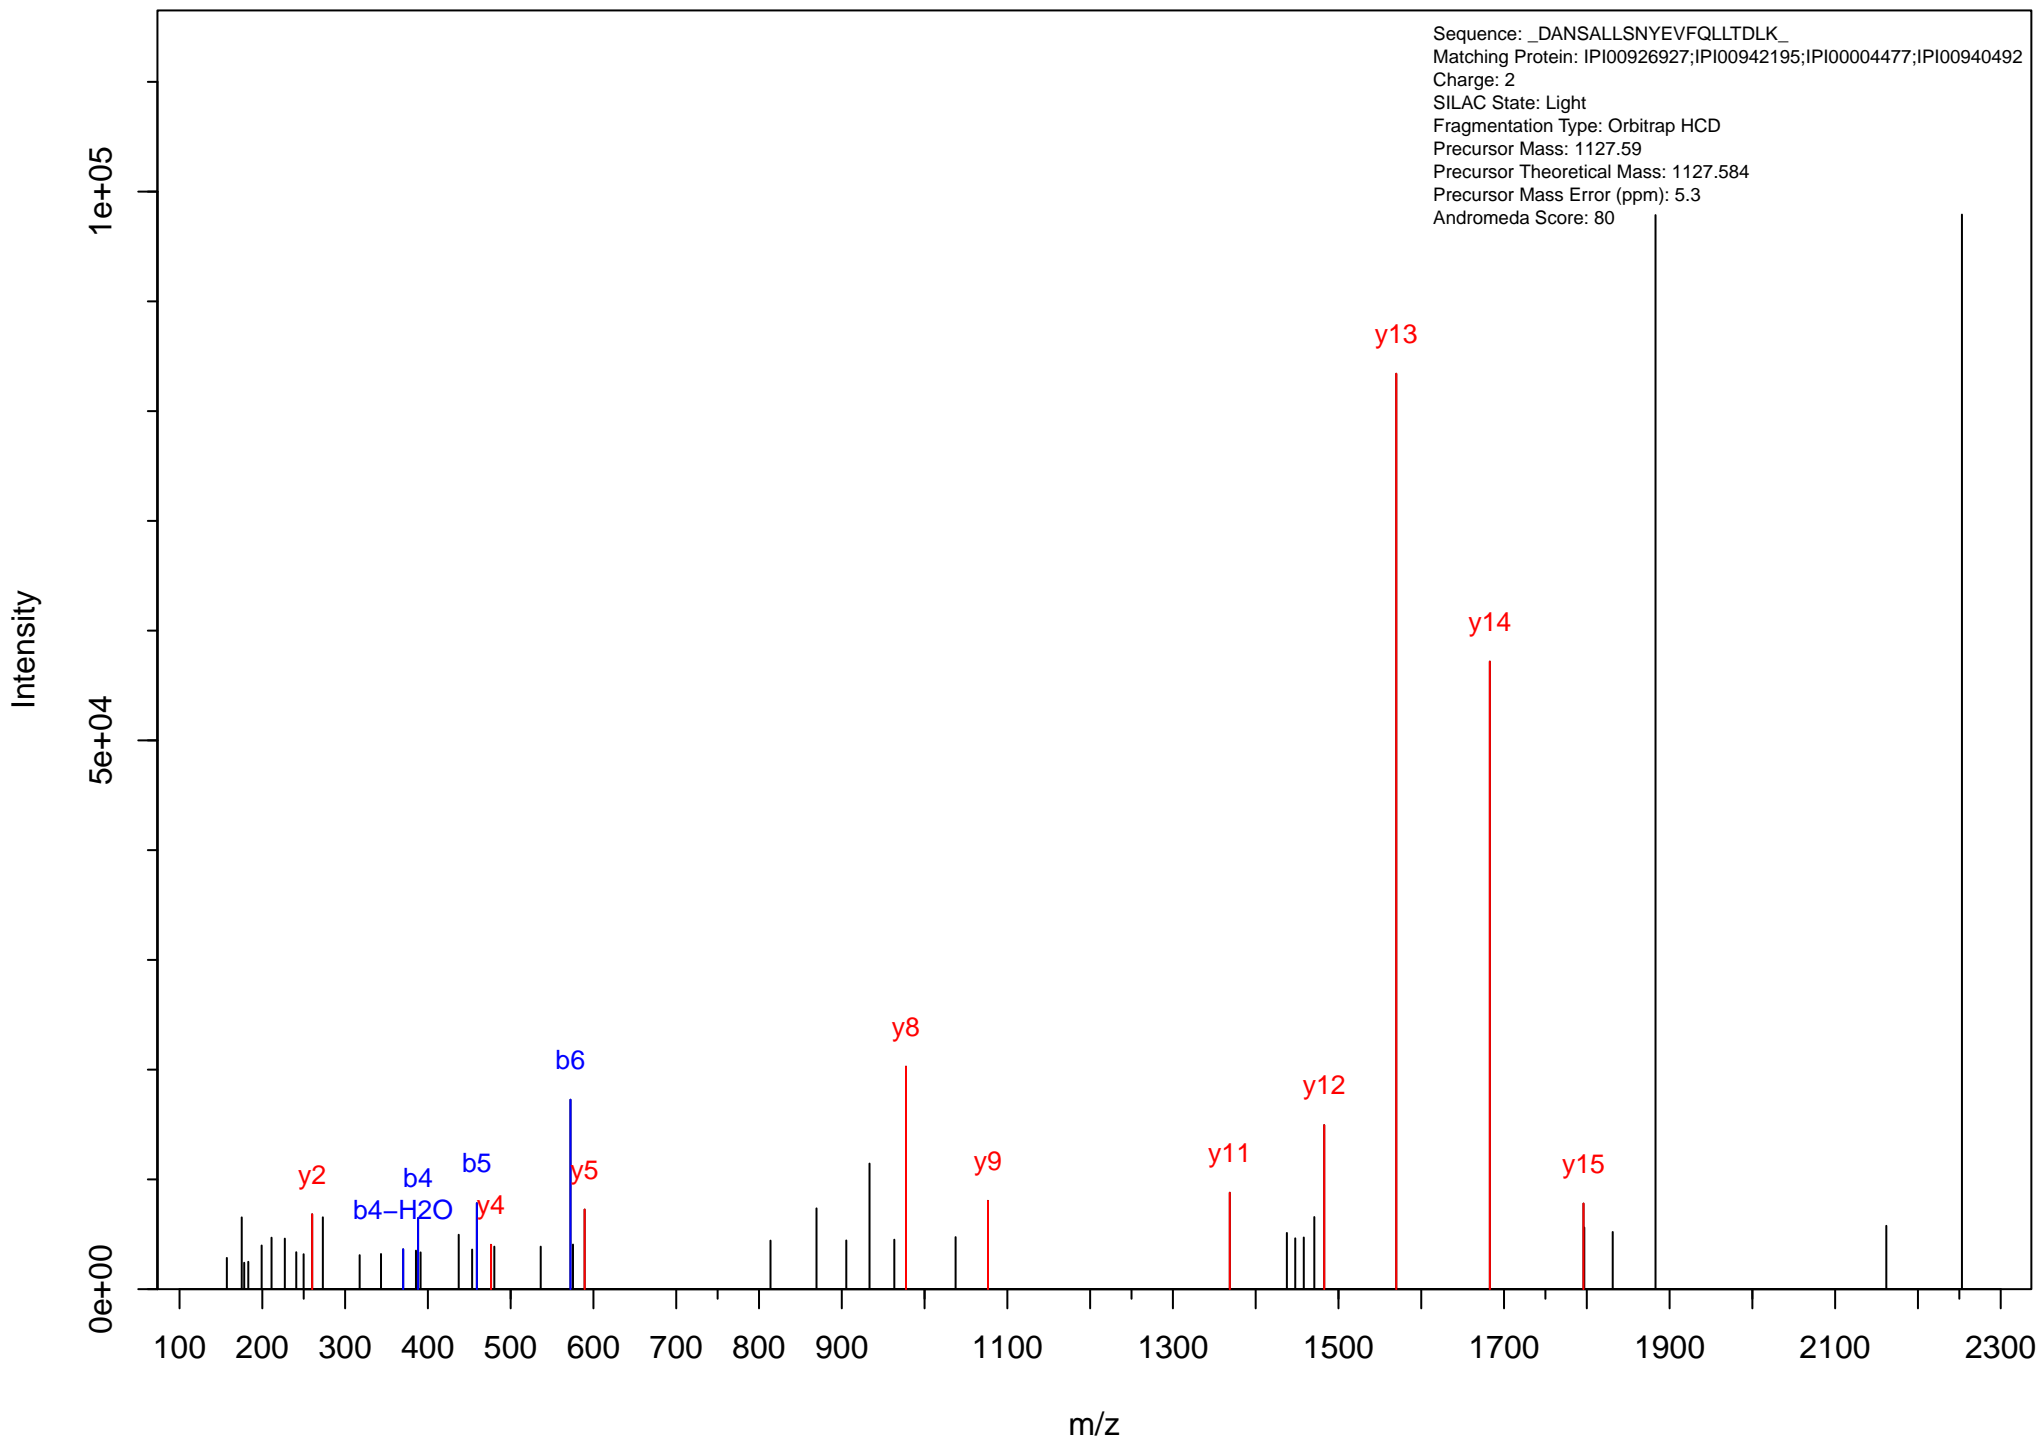

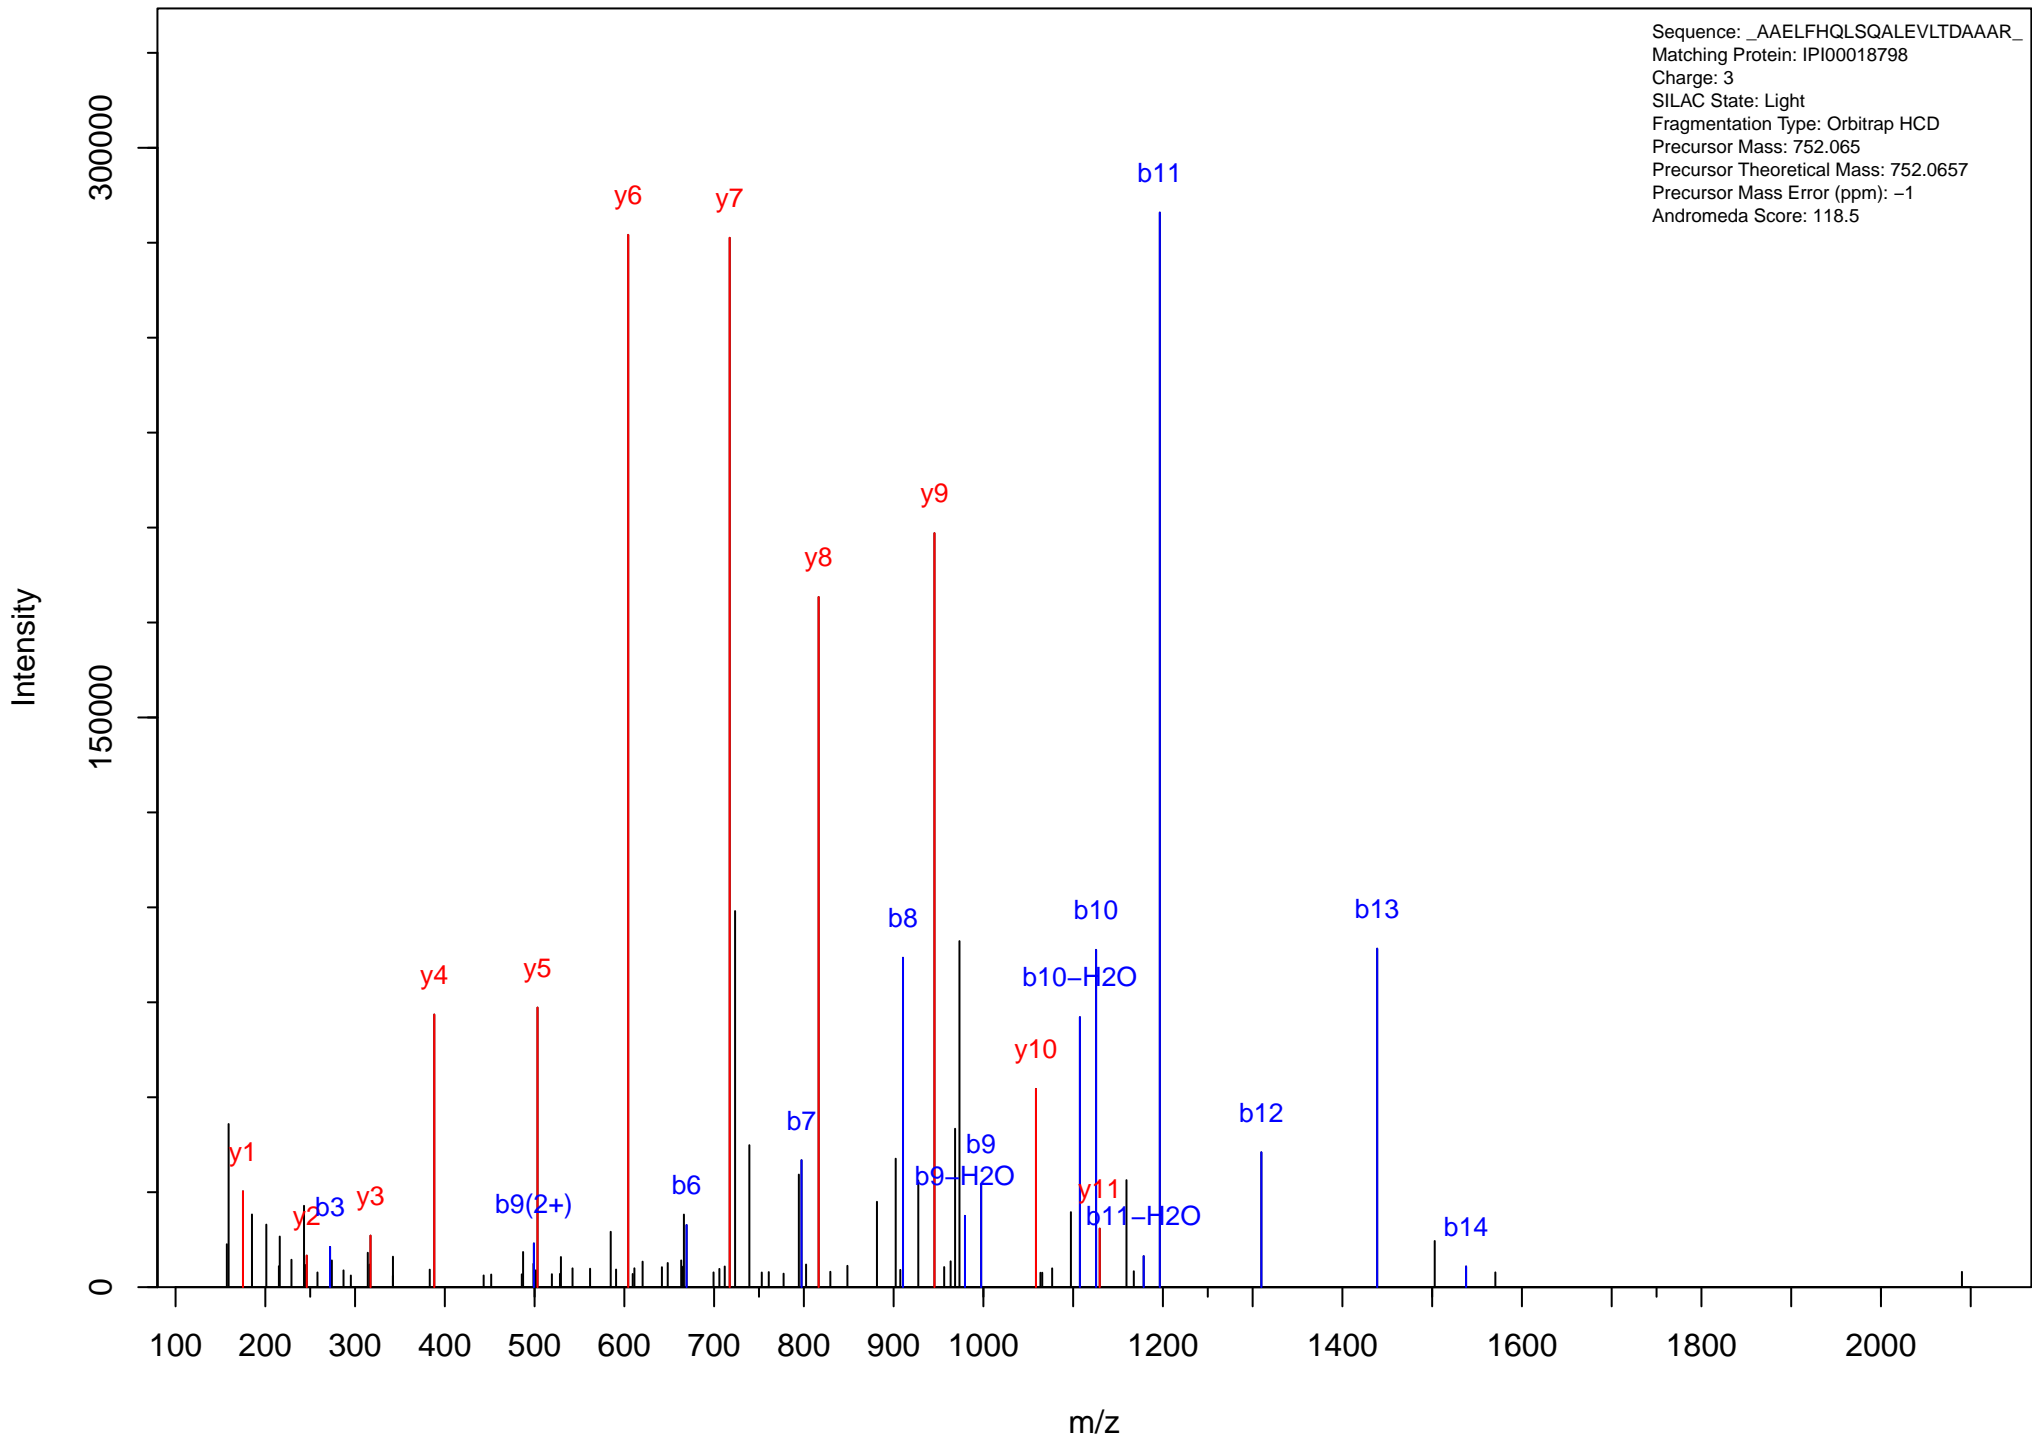

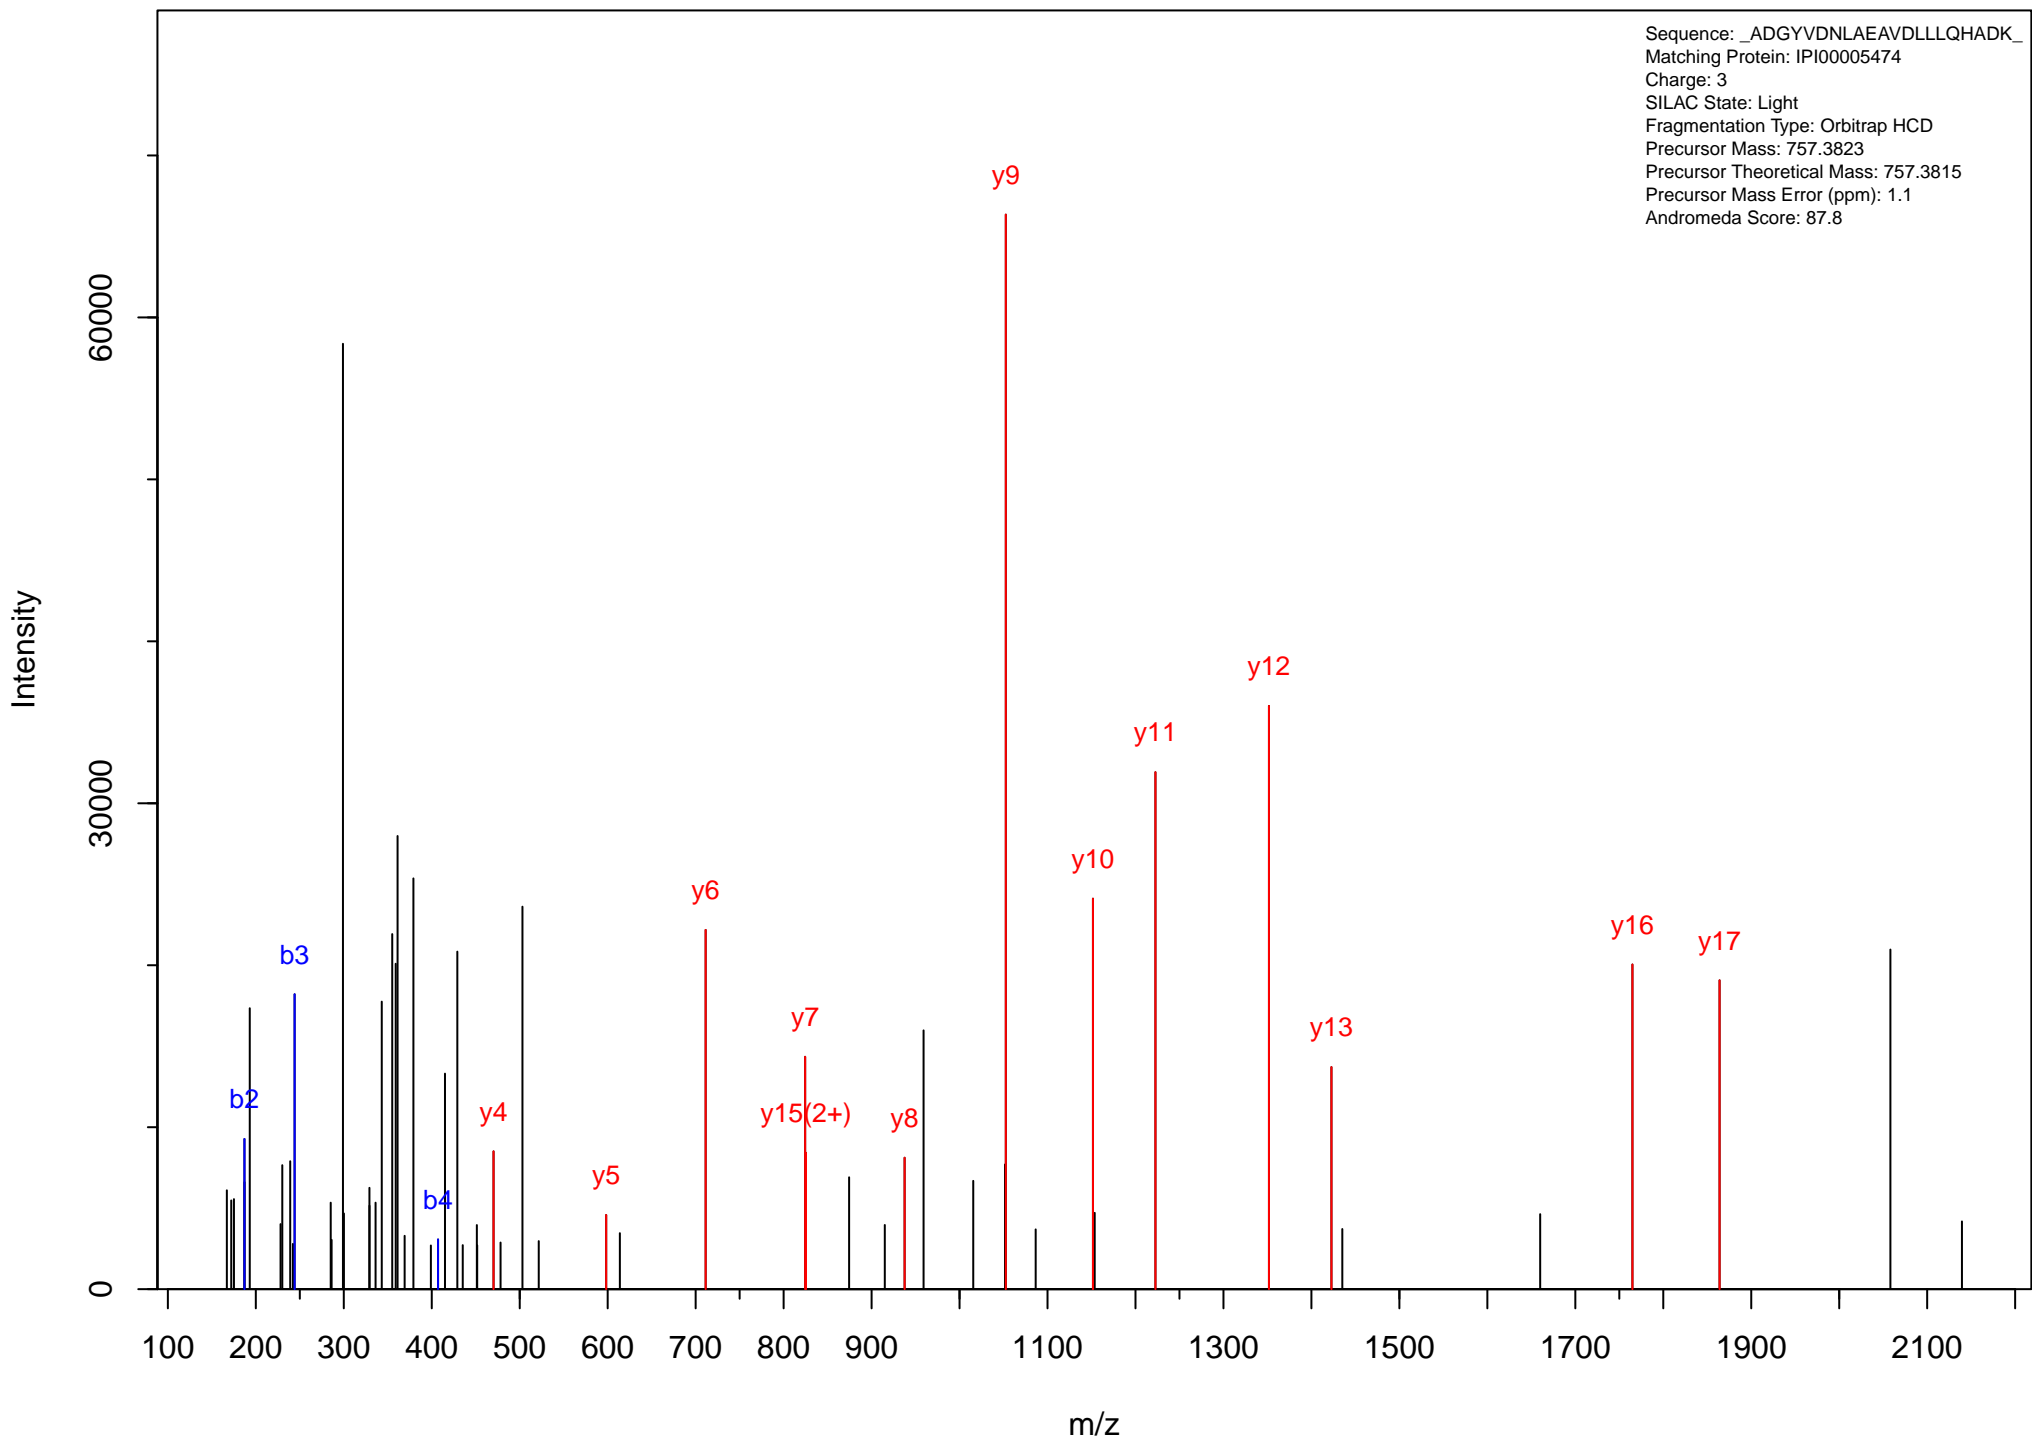

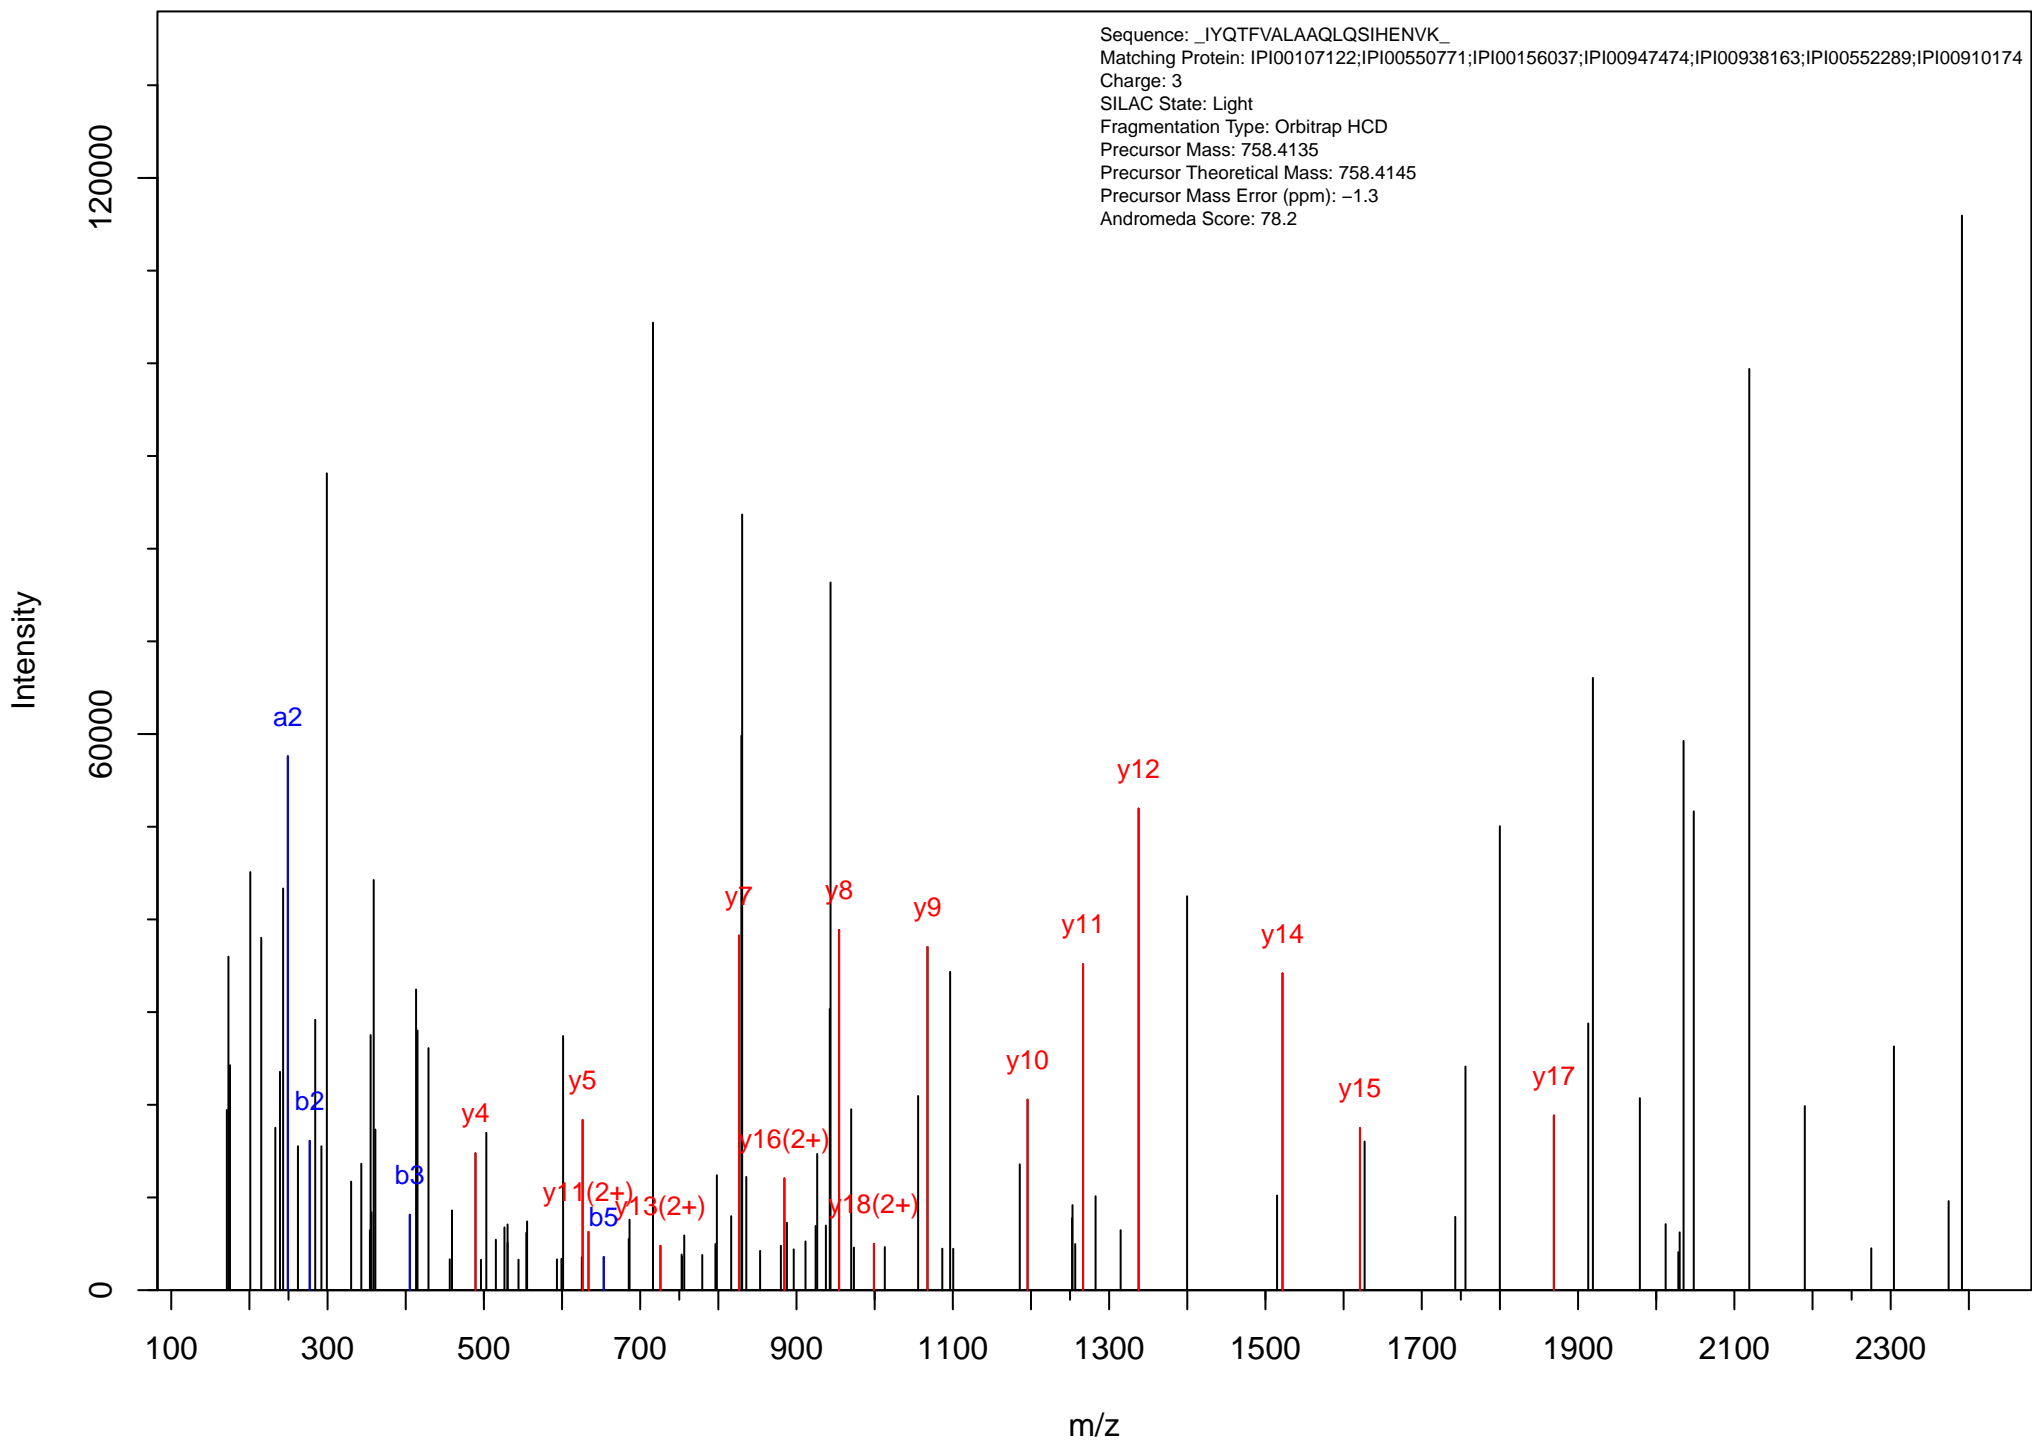

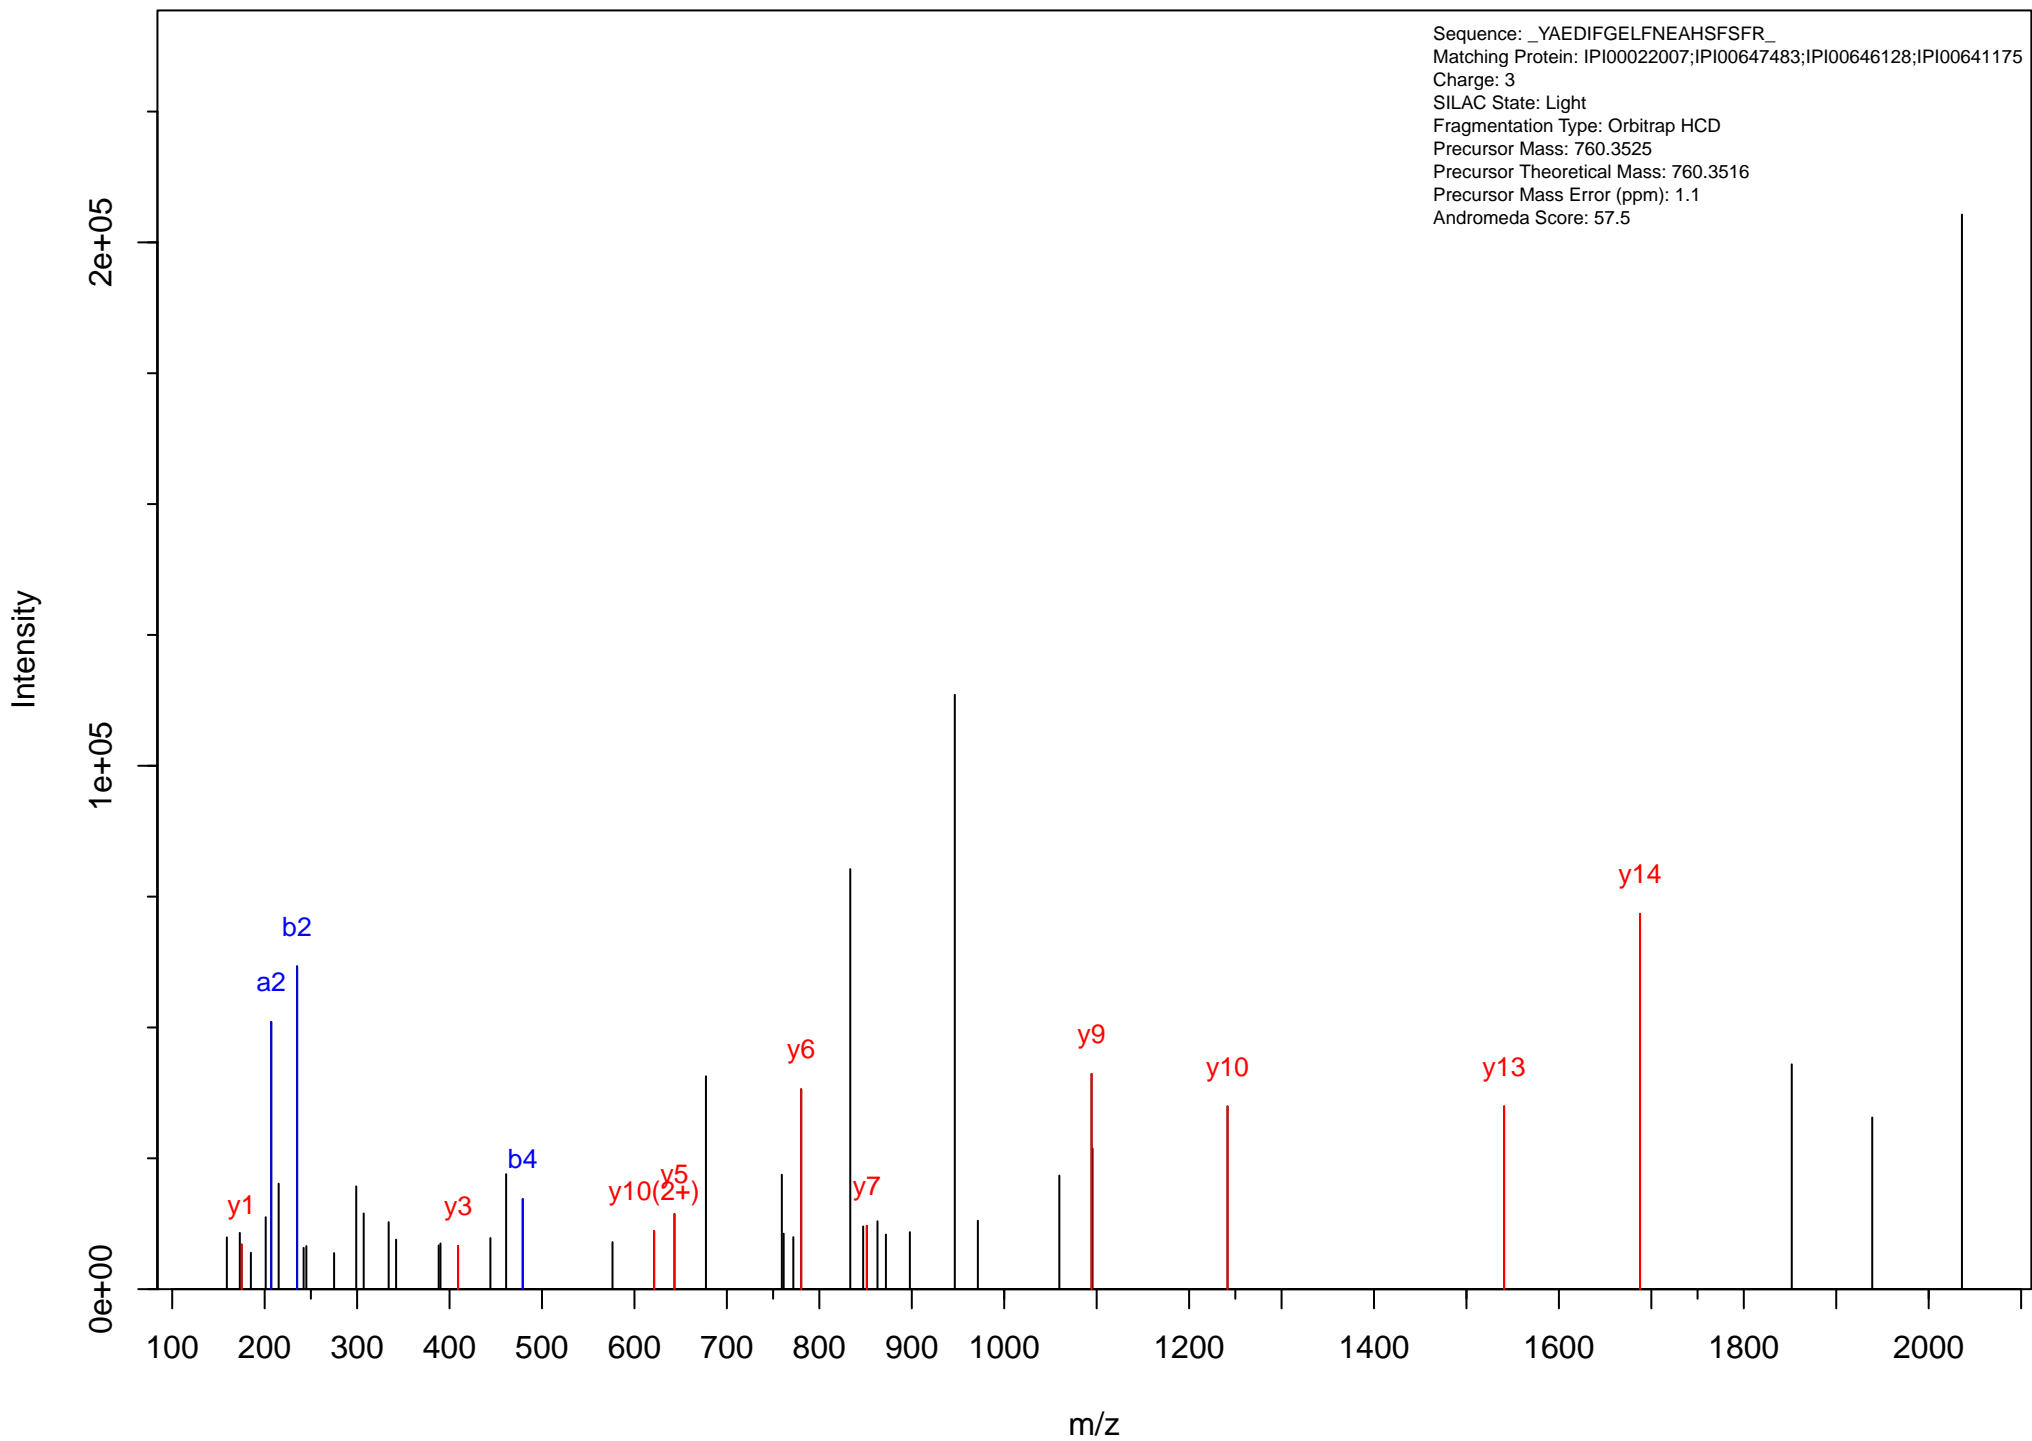

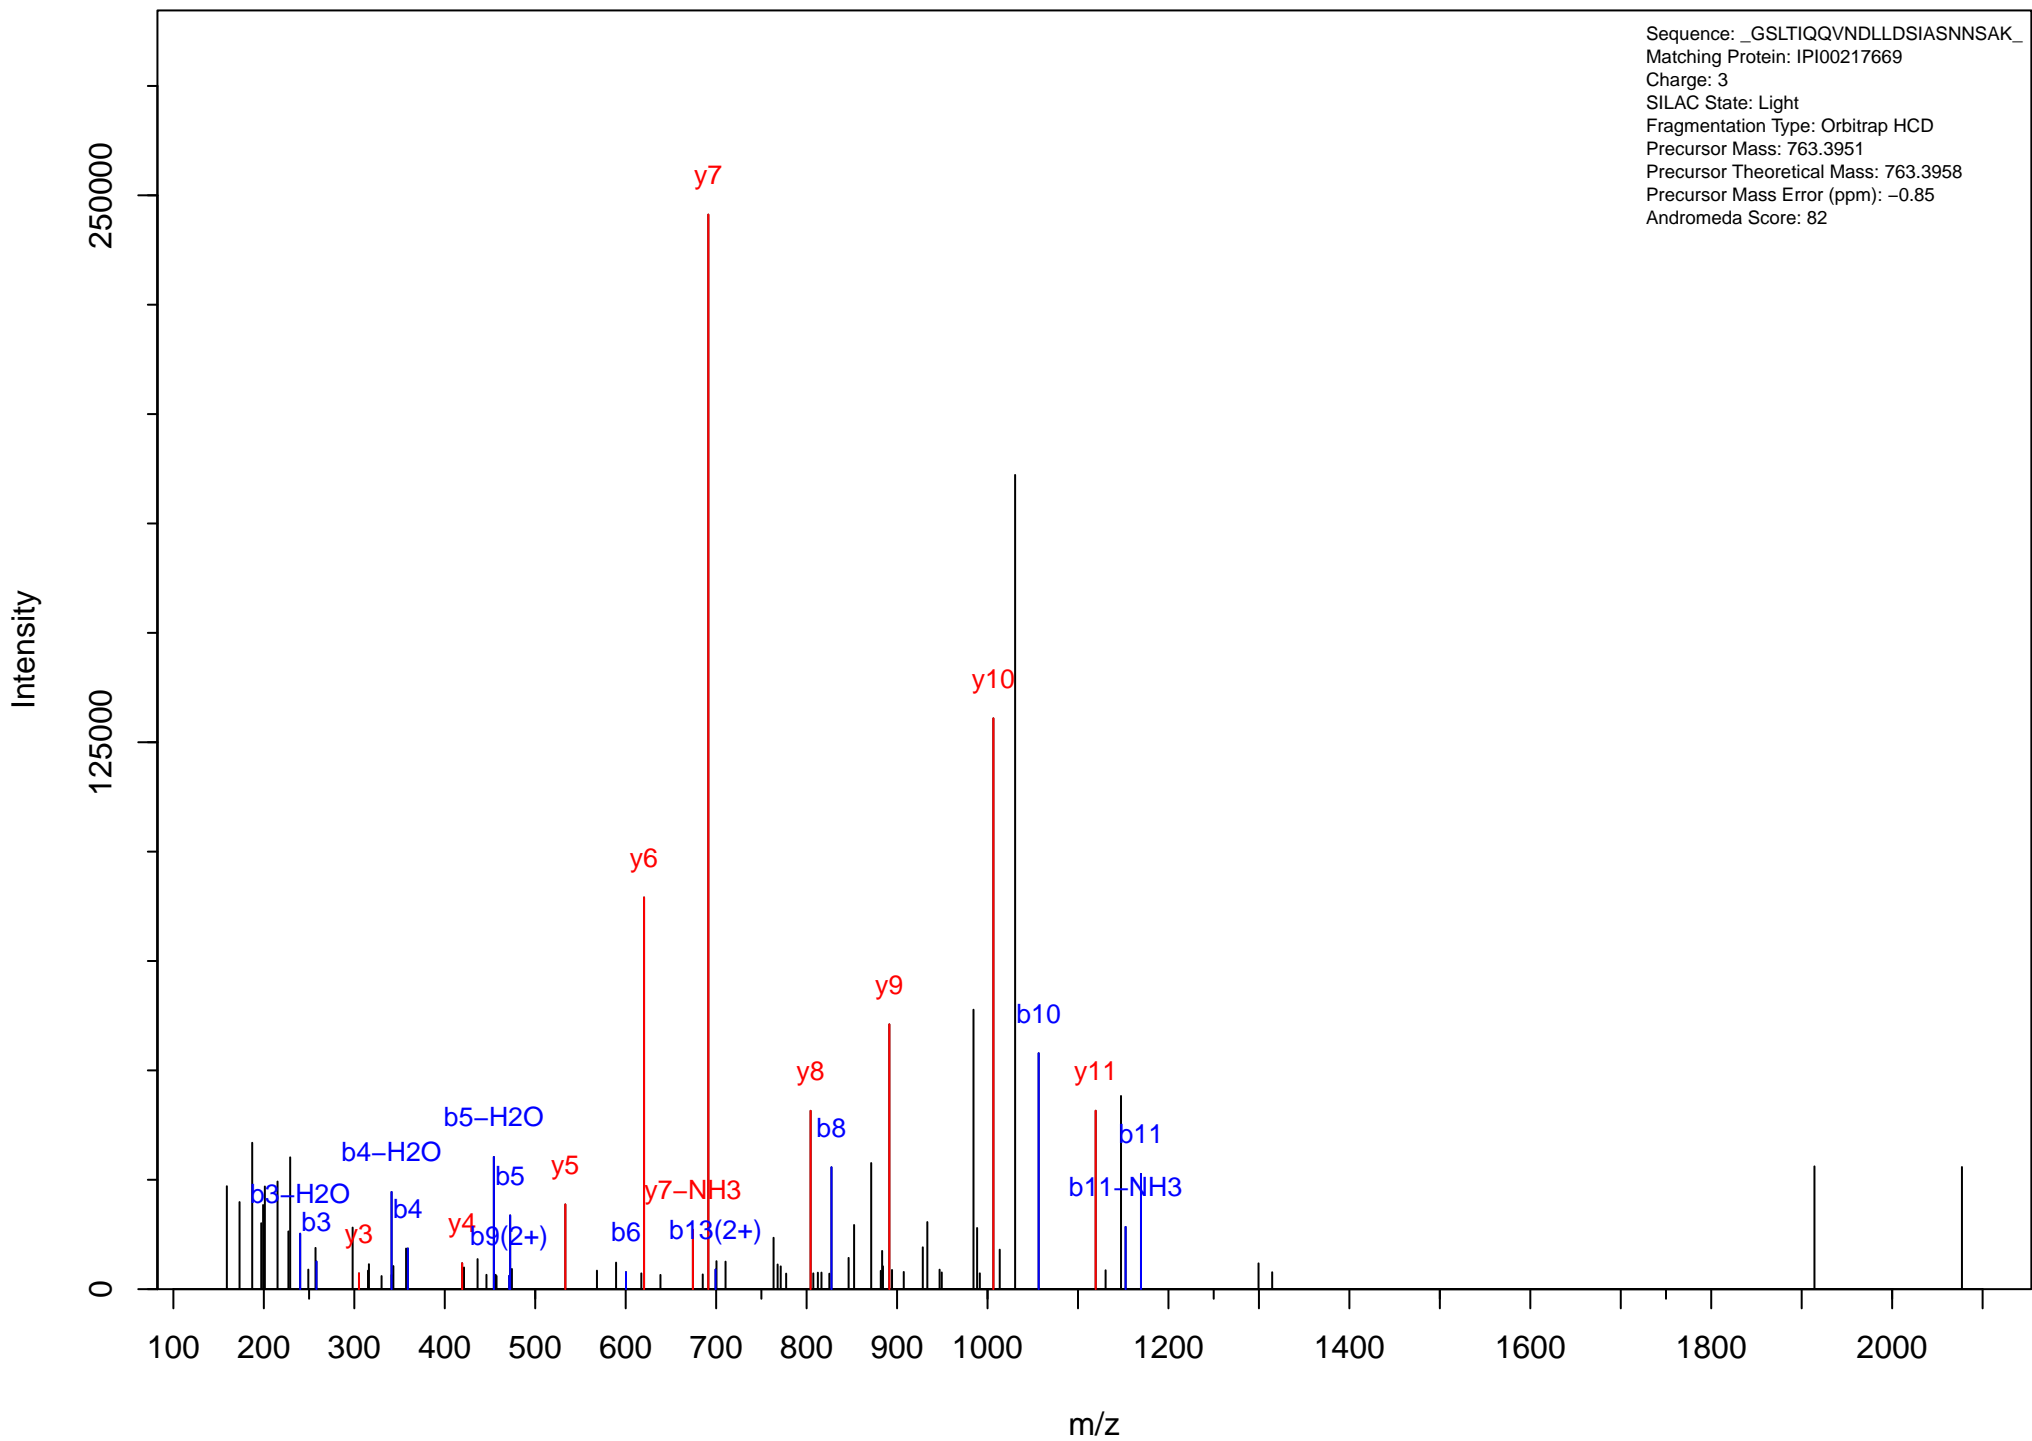

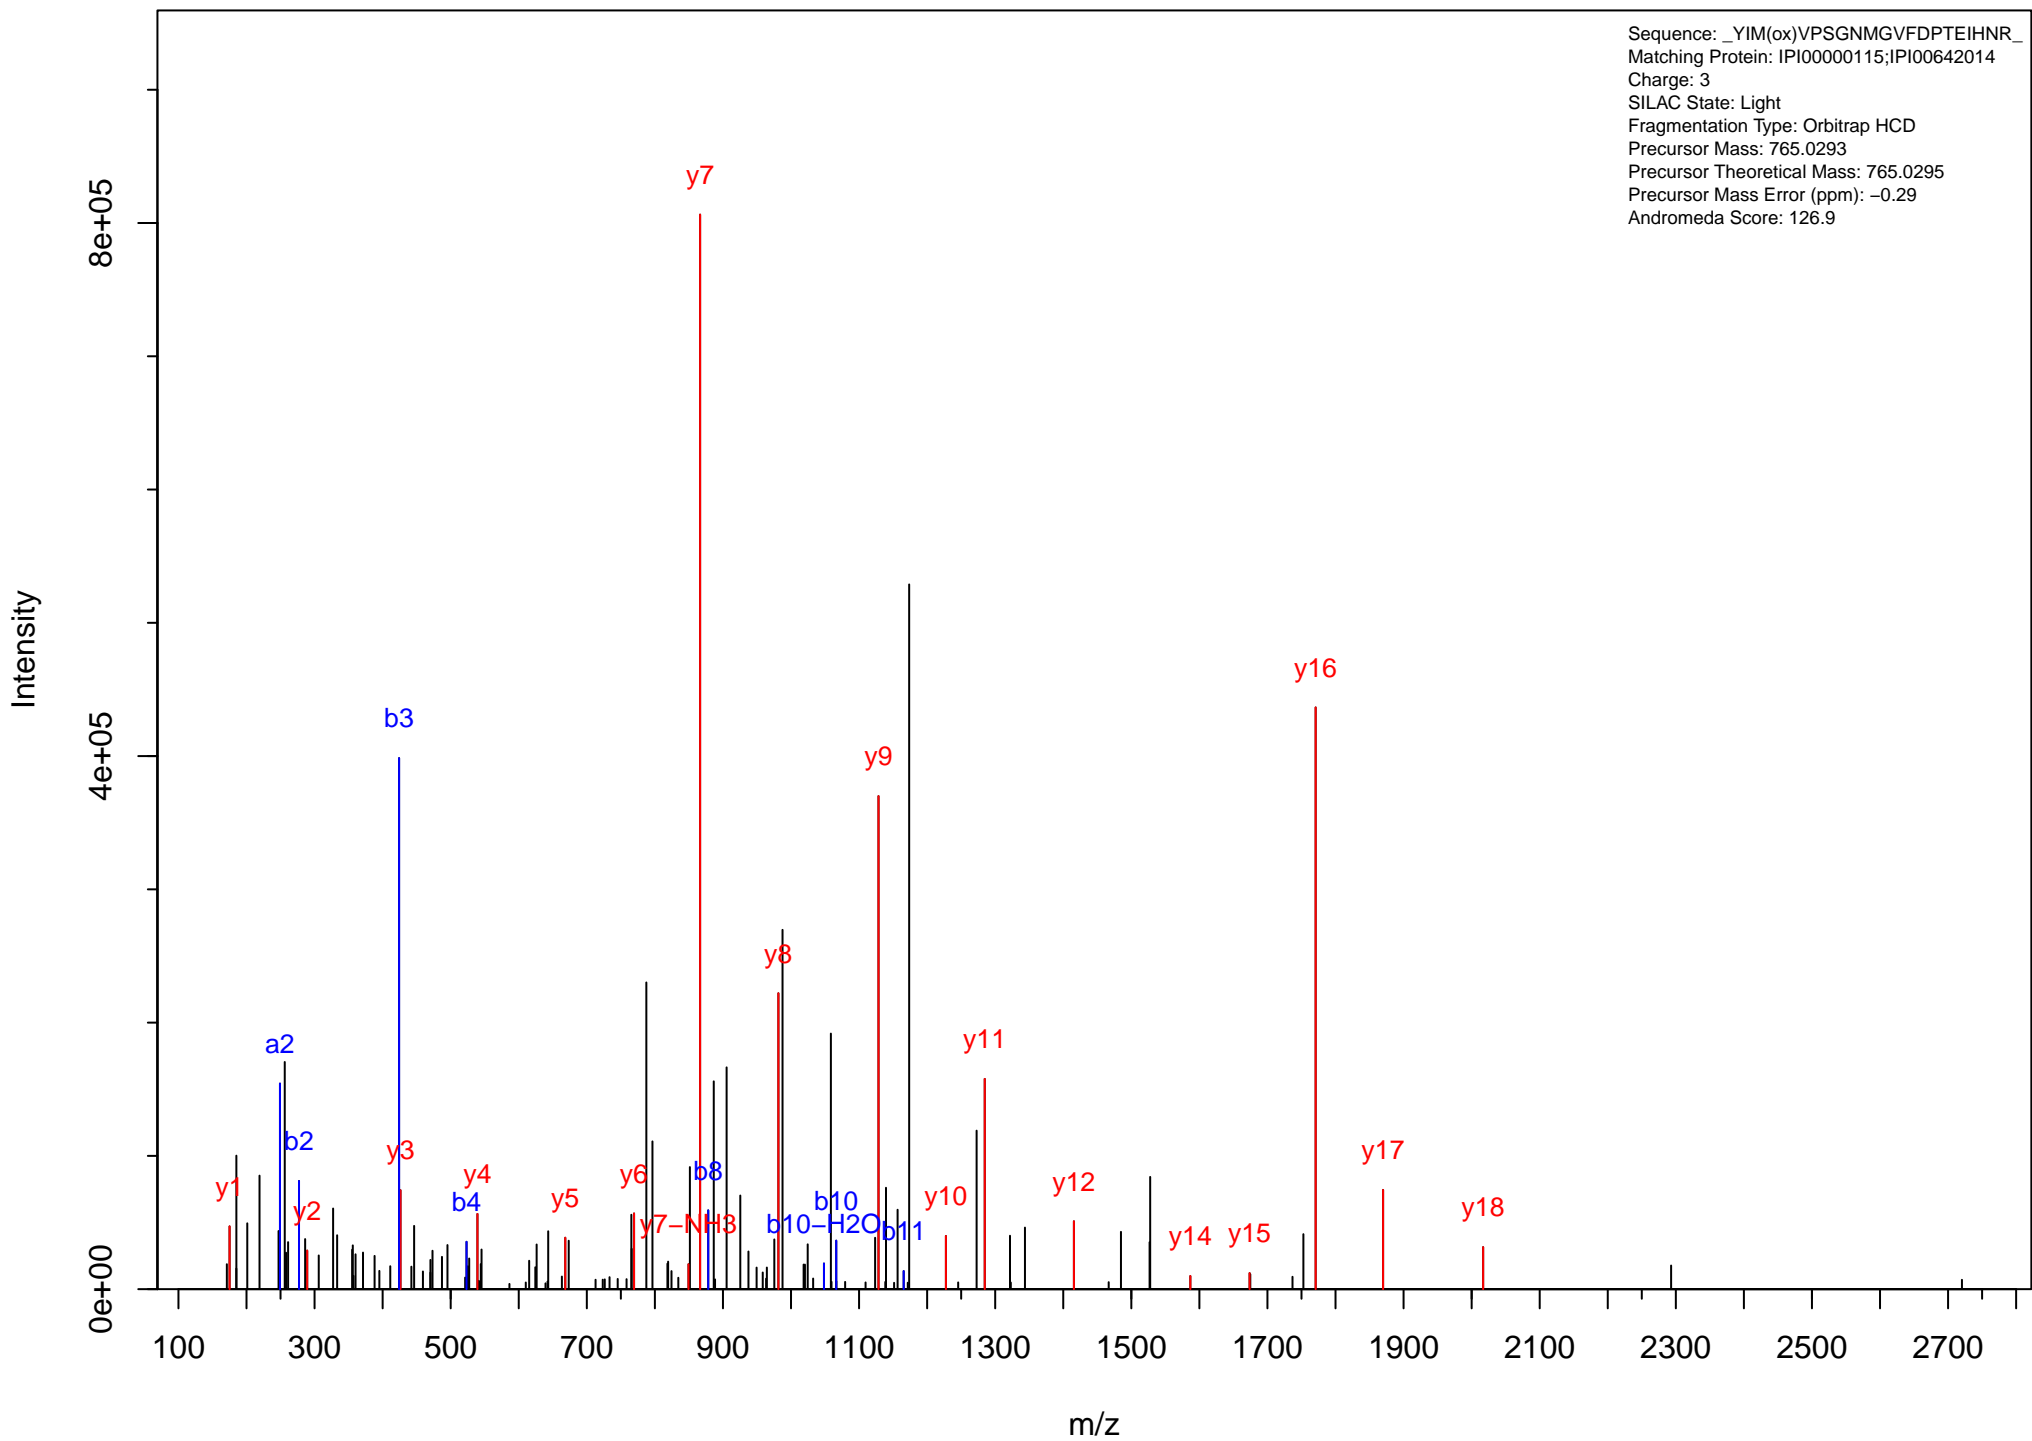

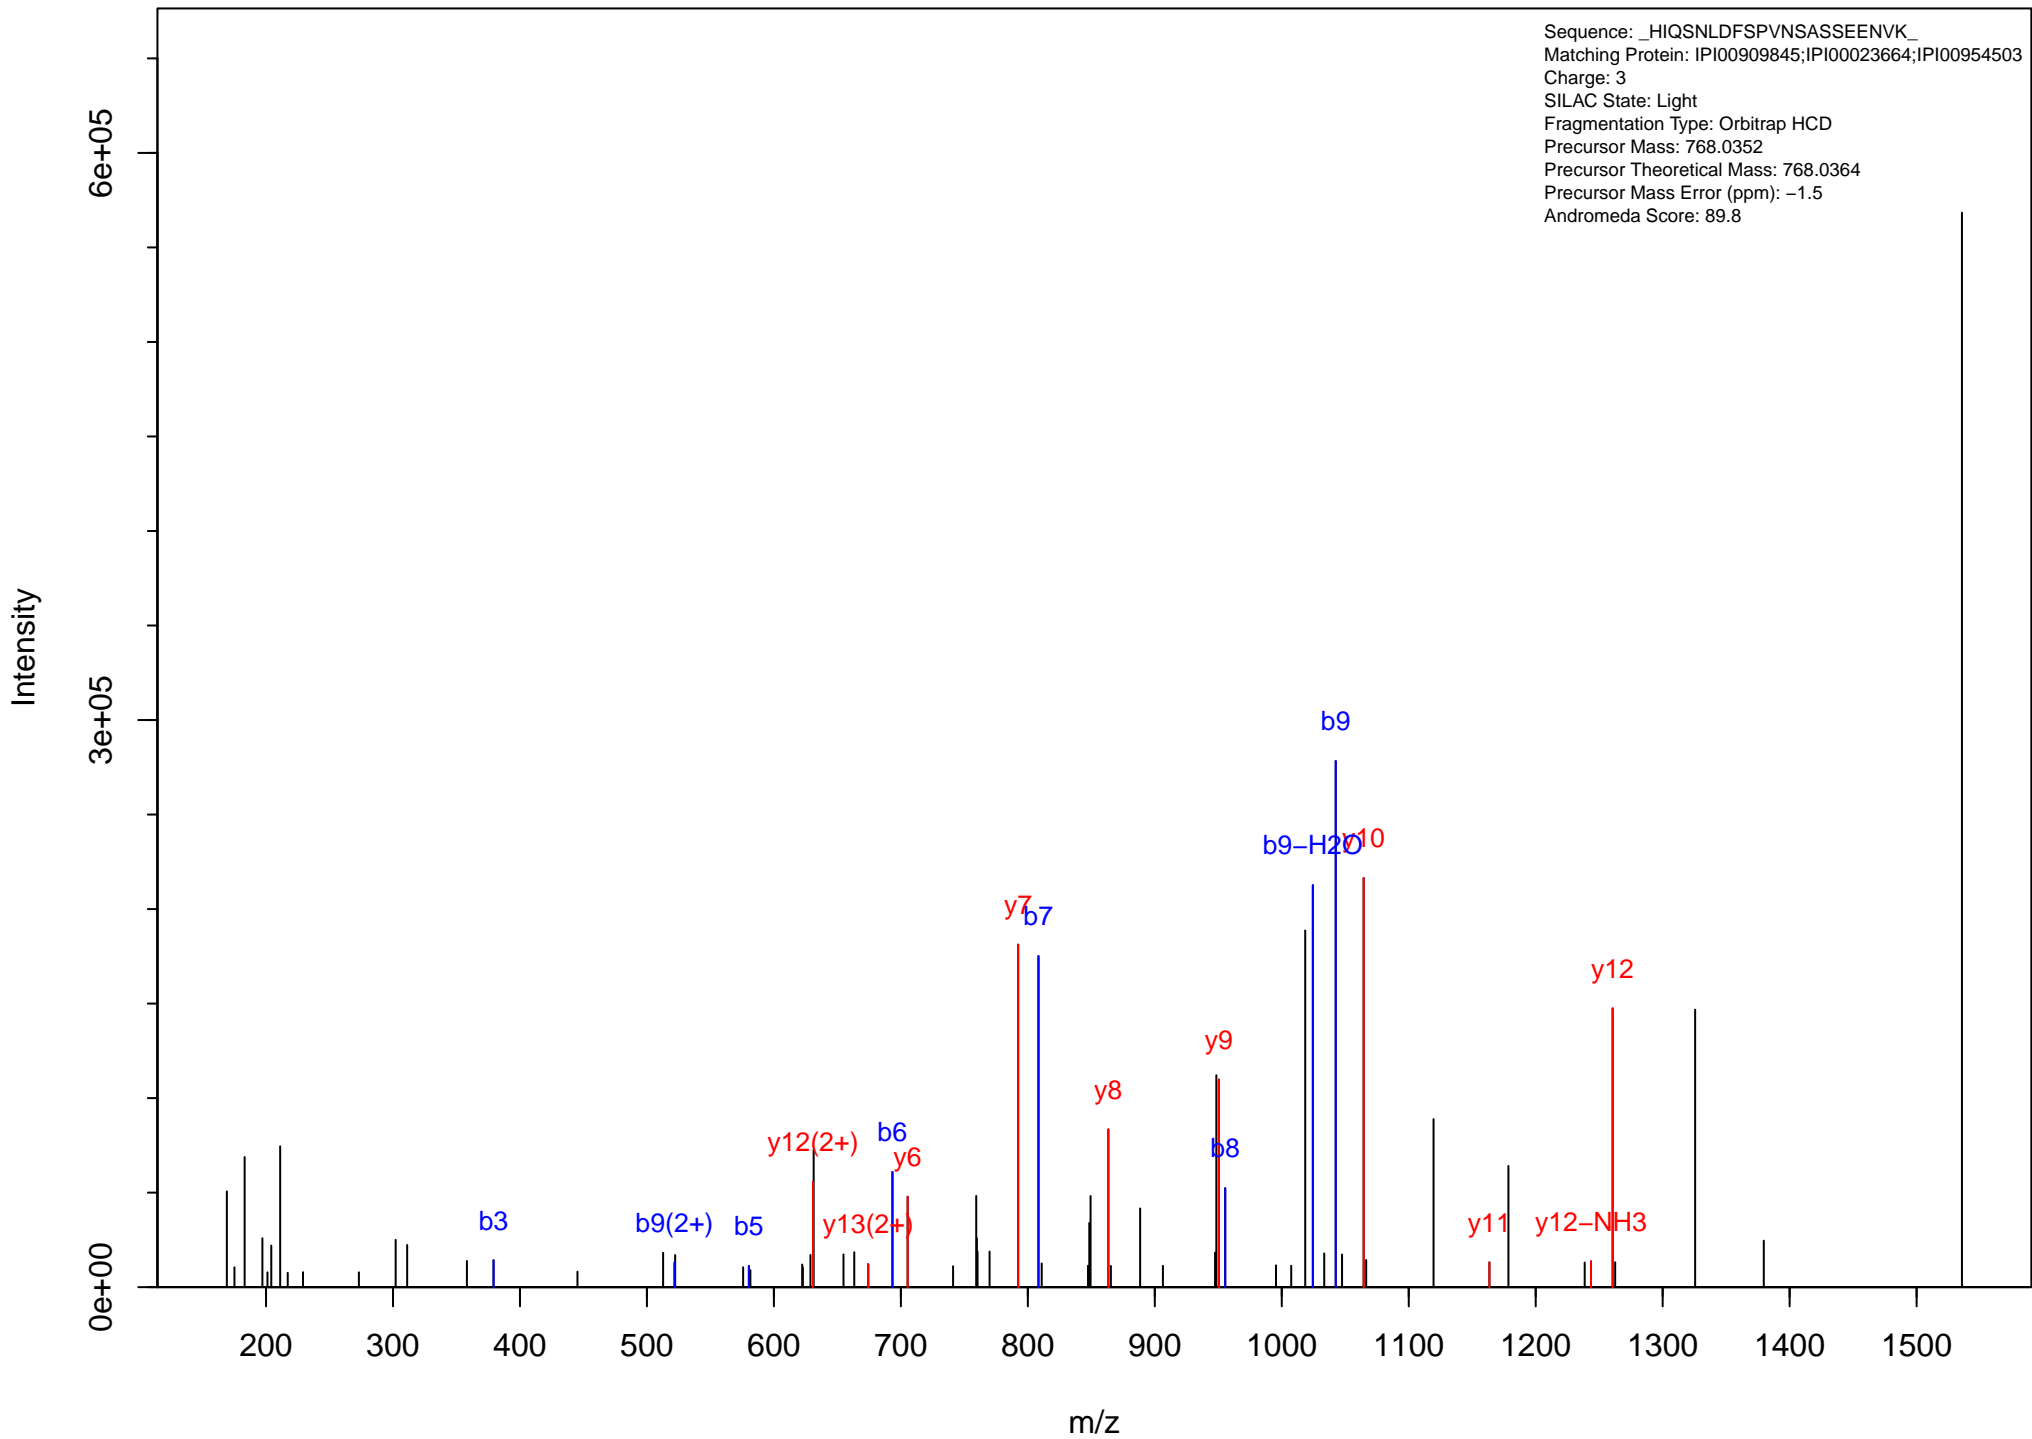

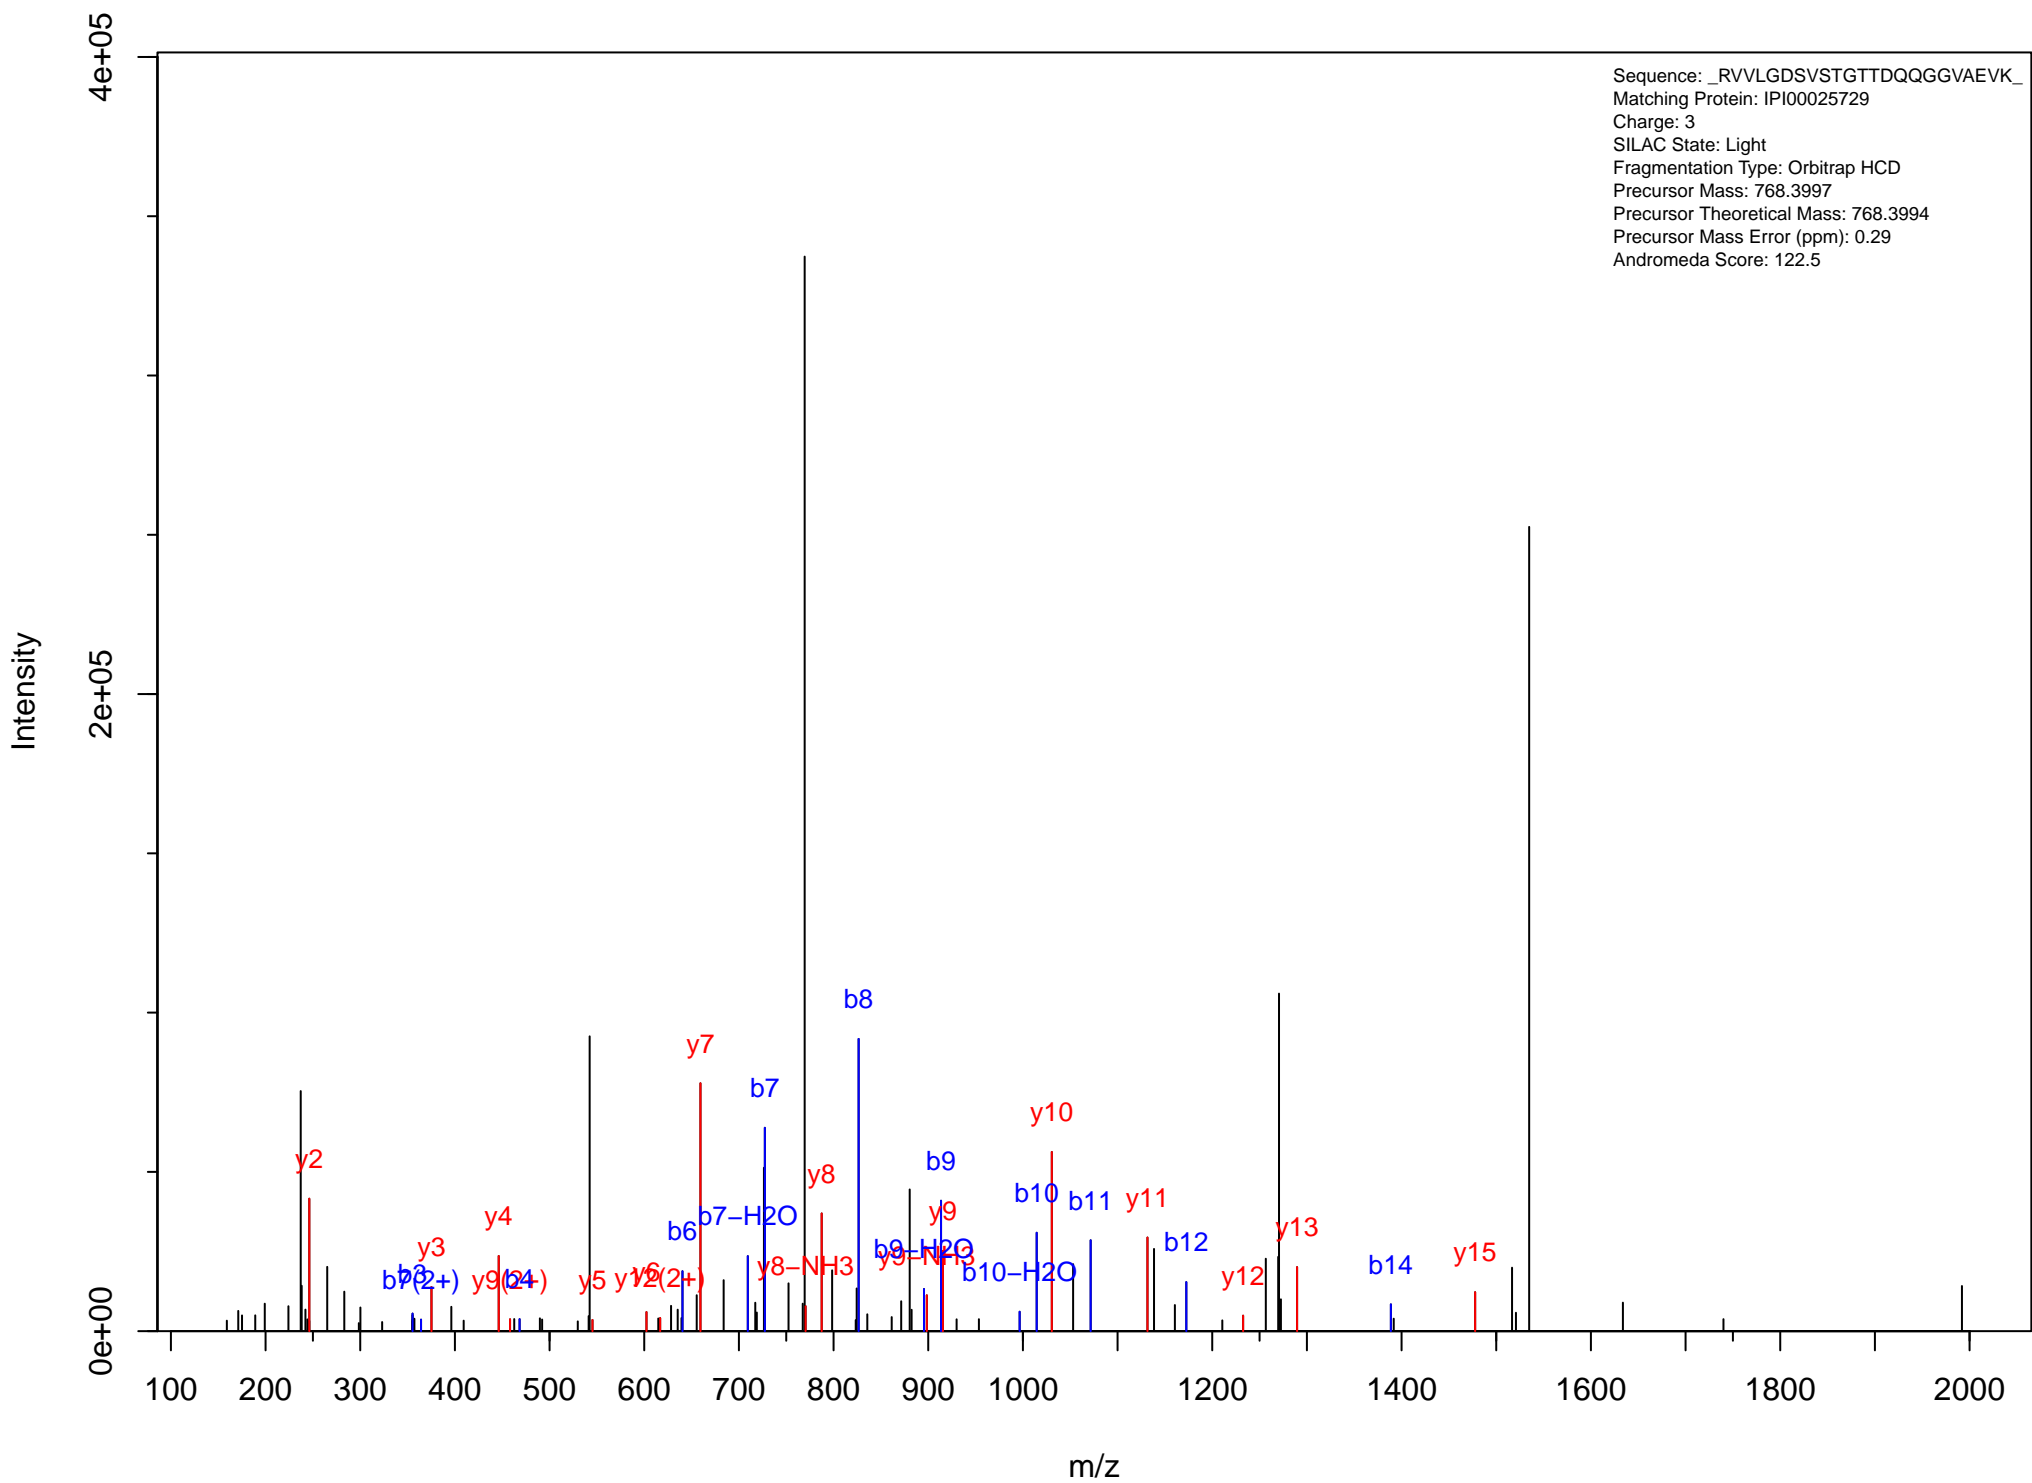

Intensity

4e+05

2e+05

0e+00

Sequence: \_LHHQNQQIQQQQQLQR\_  
Matching Protein: IPI00107693;IPI00220307;IPI00878147;IPI00554734;IPI00879996  
Charge: 4  
SILAC State: Light  
Fragmentation Type: Orbitrap HCD  
Precursor Mass: 578.5496  
Precursor Theoretical Mass: 578.5495  
Precursor Mass Error (ppm): 0.12  
Andromeda Score: 80.6

100 200 300 400 500 600 700 800 900 1000 1100 1200 1300 1400 1500 1600 1700

m/z

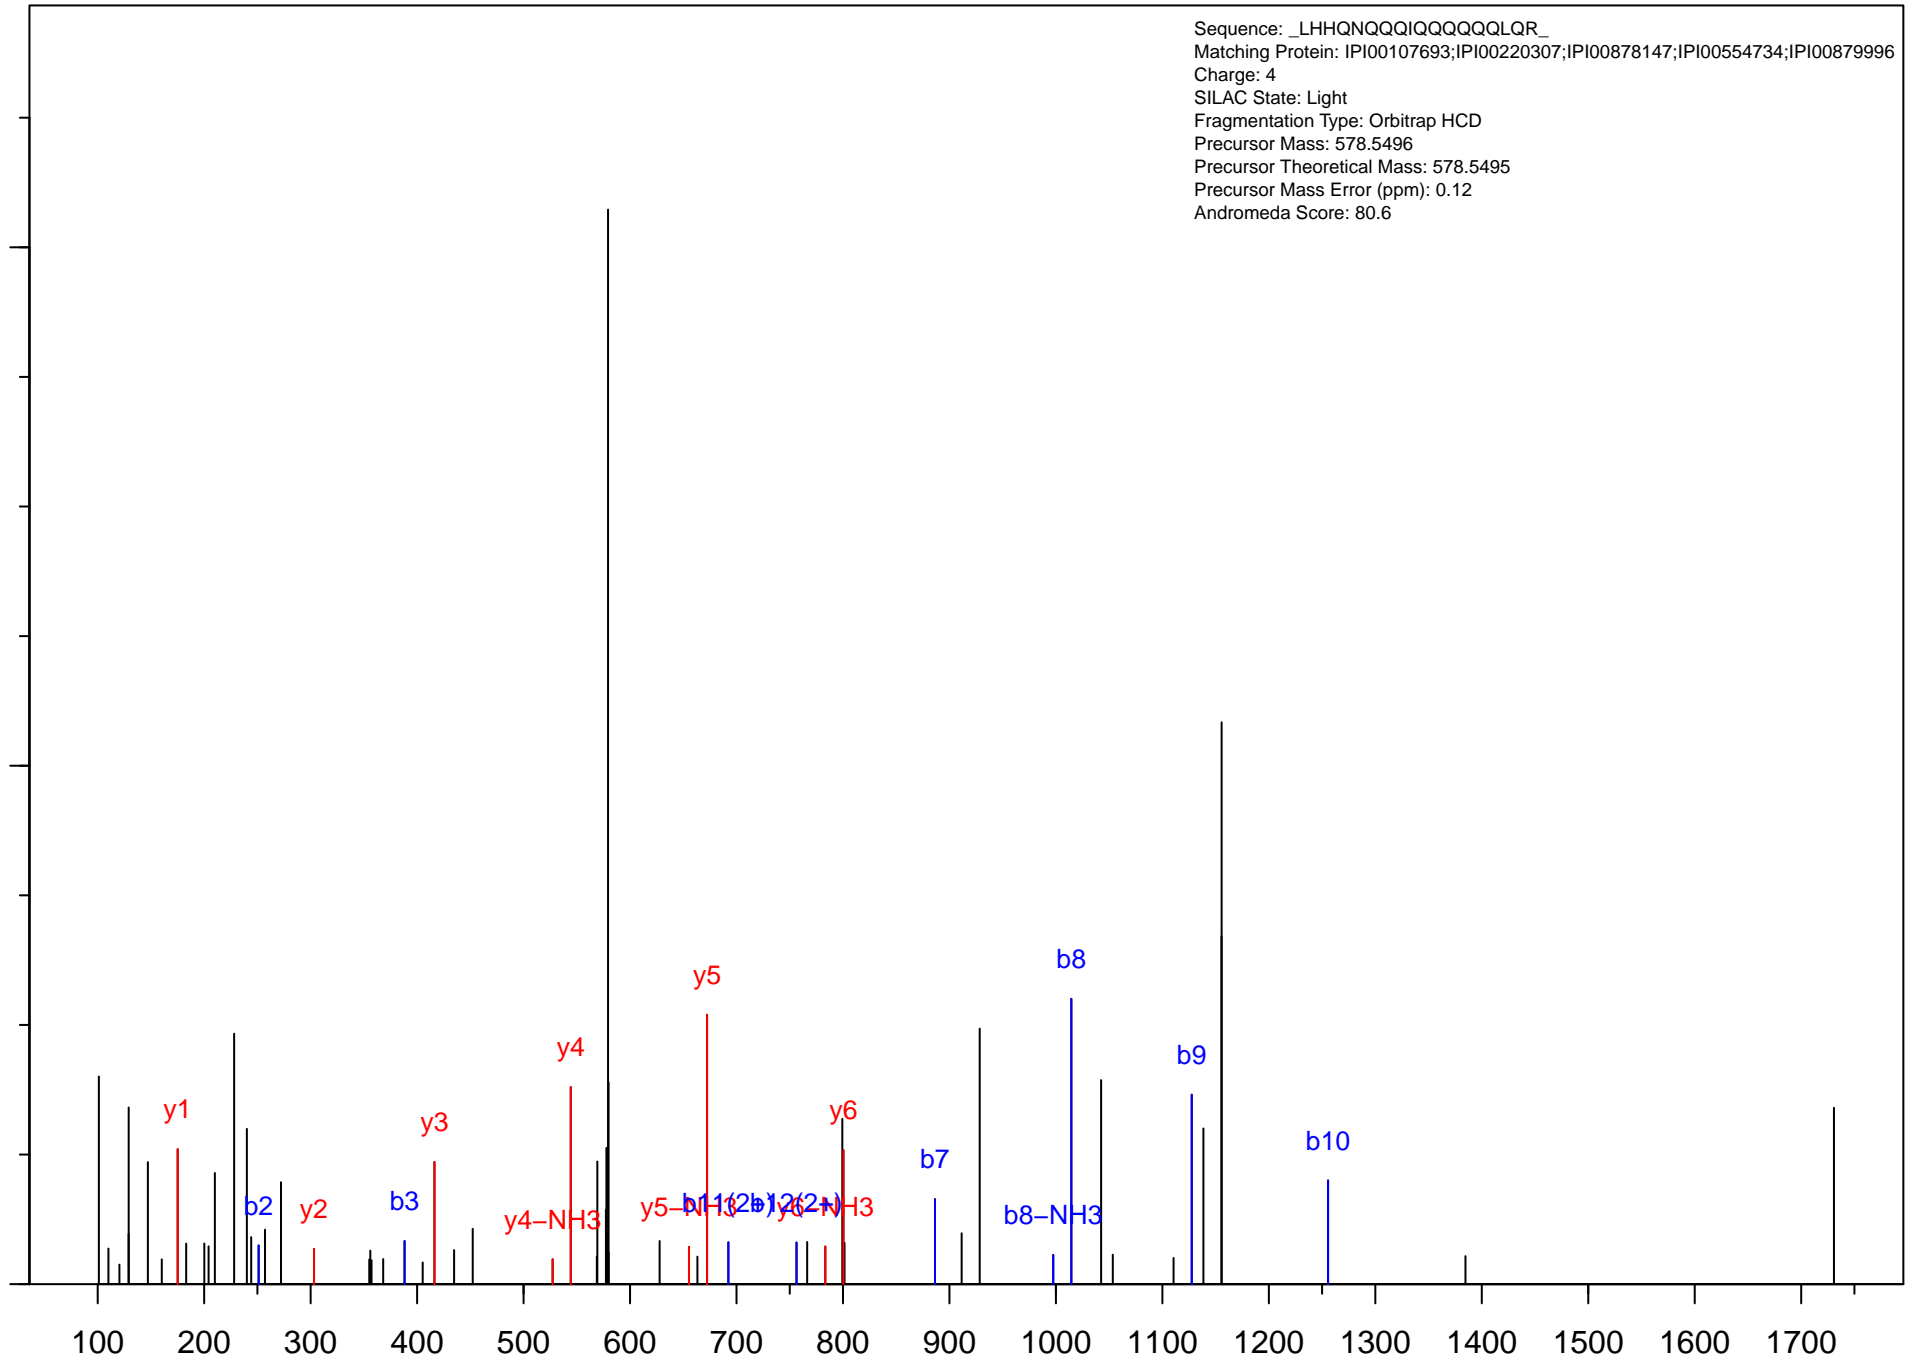

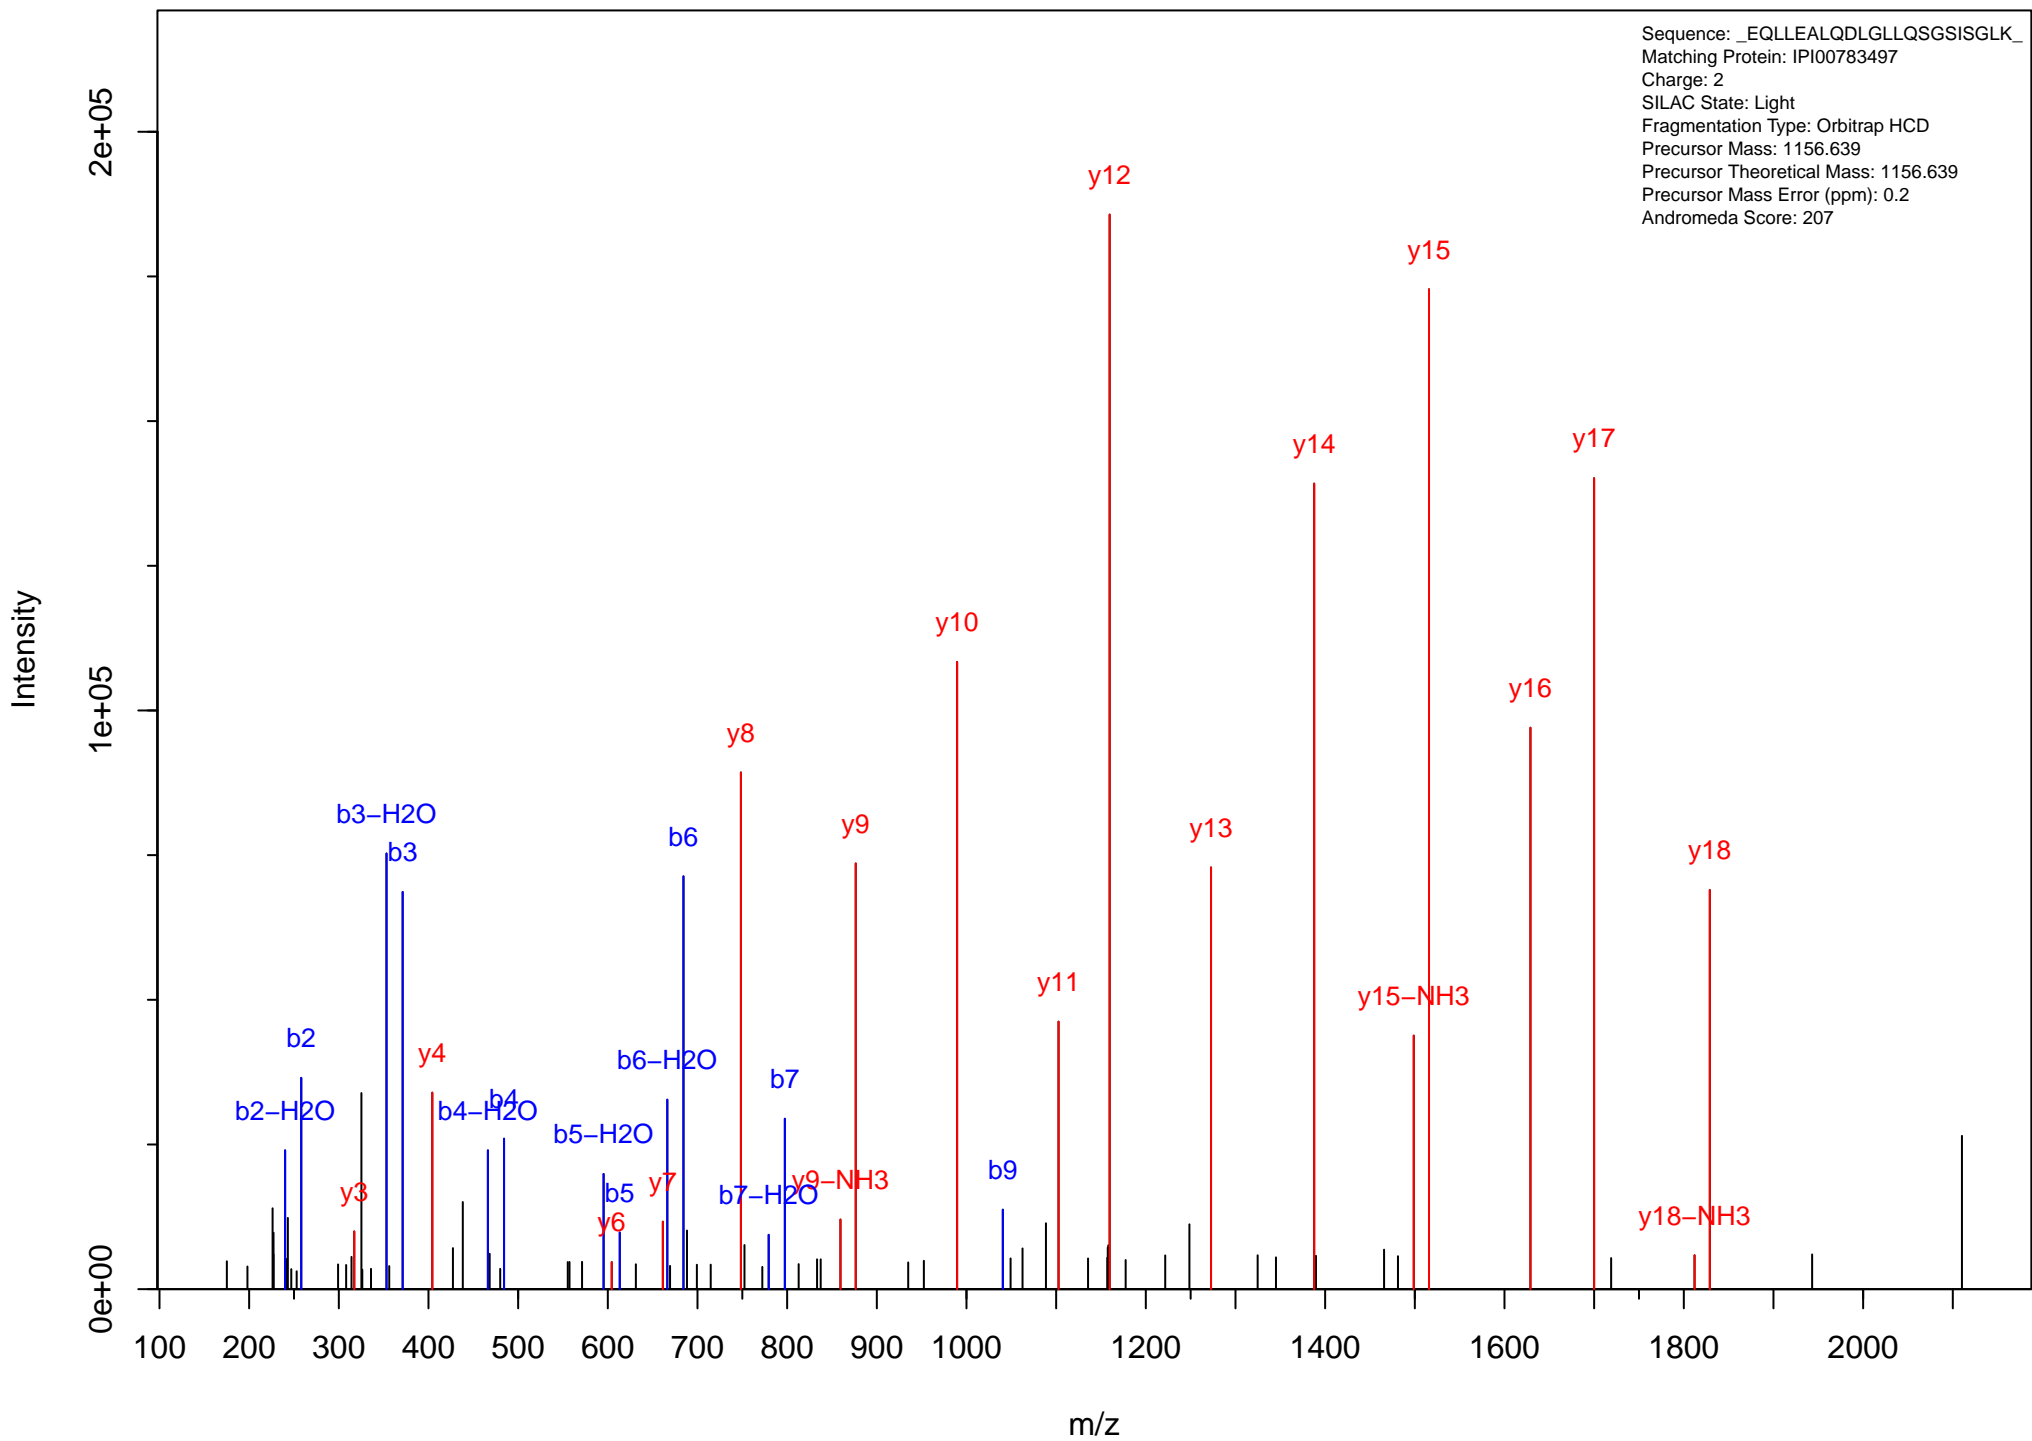

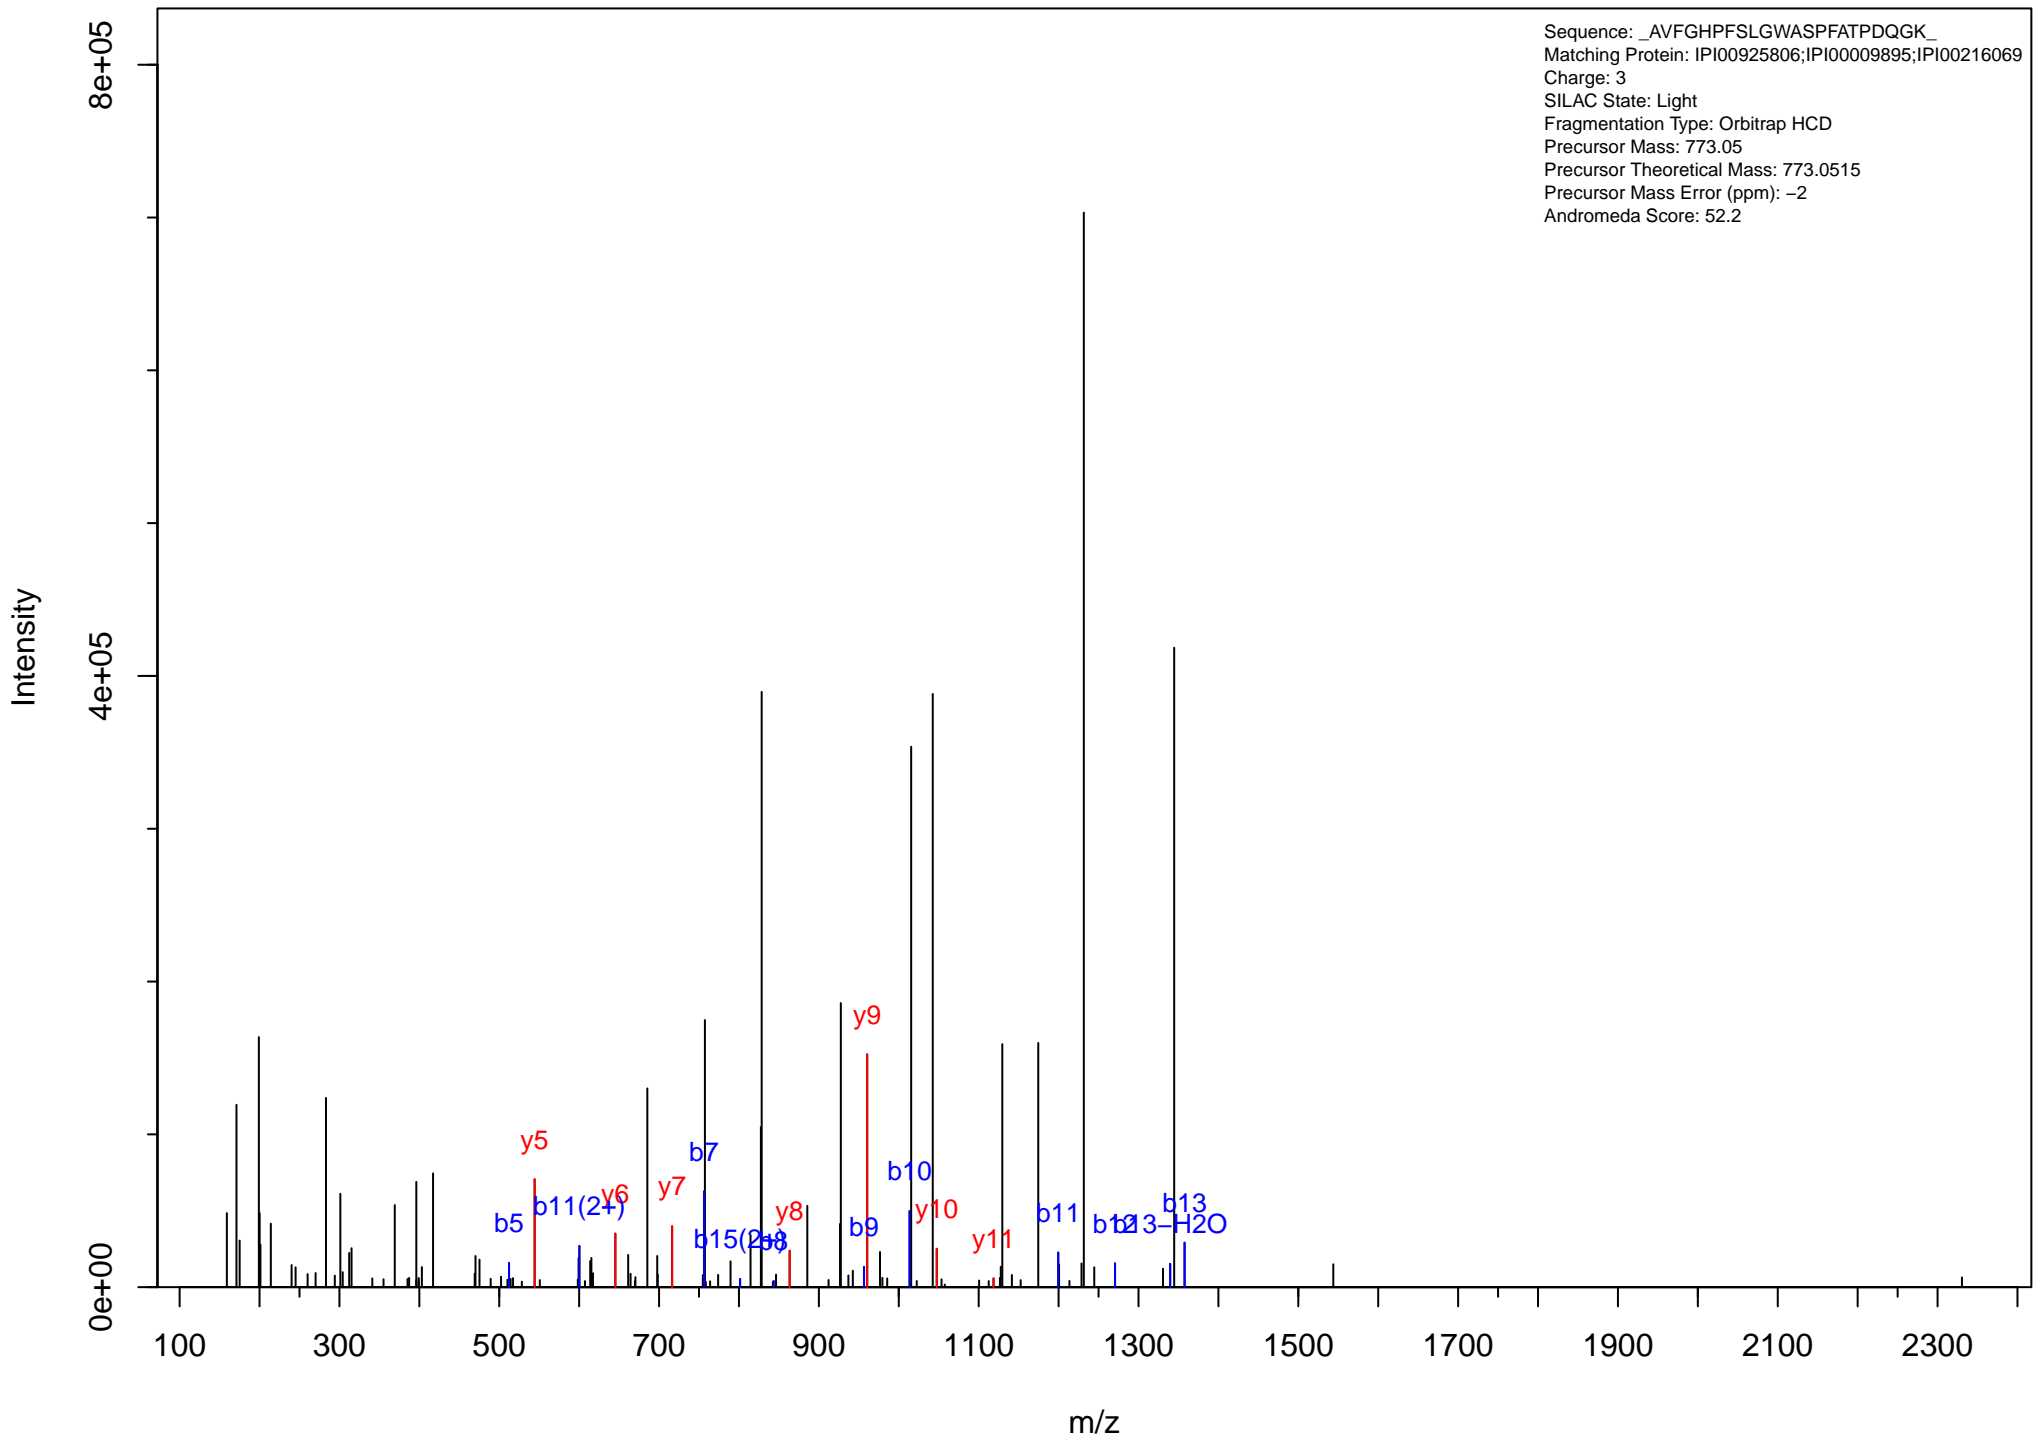

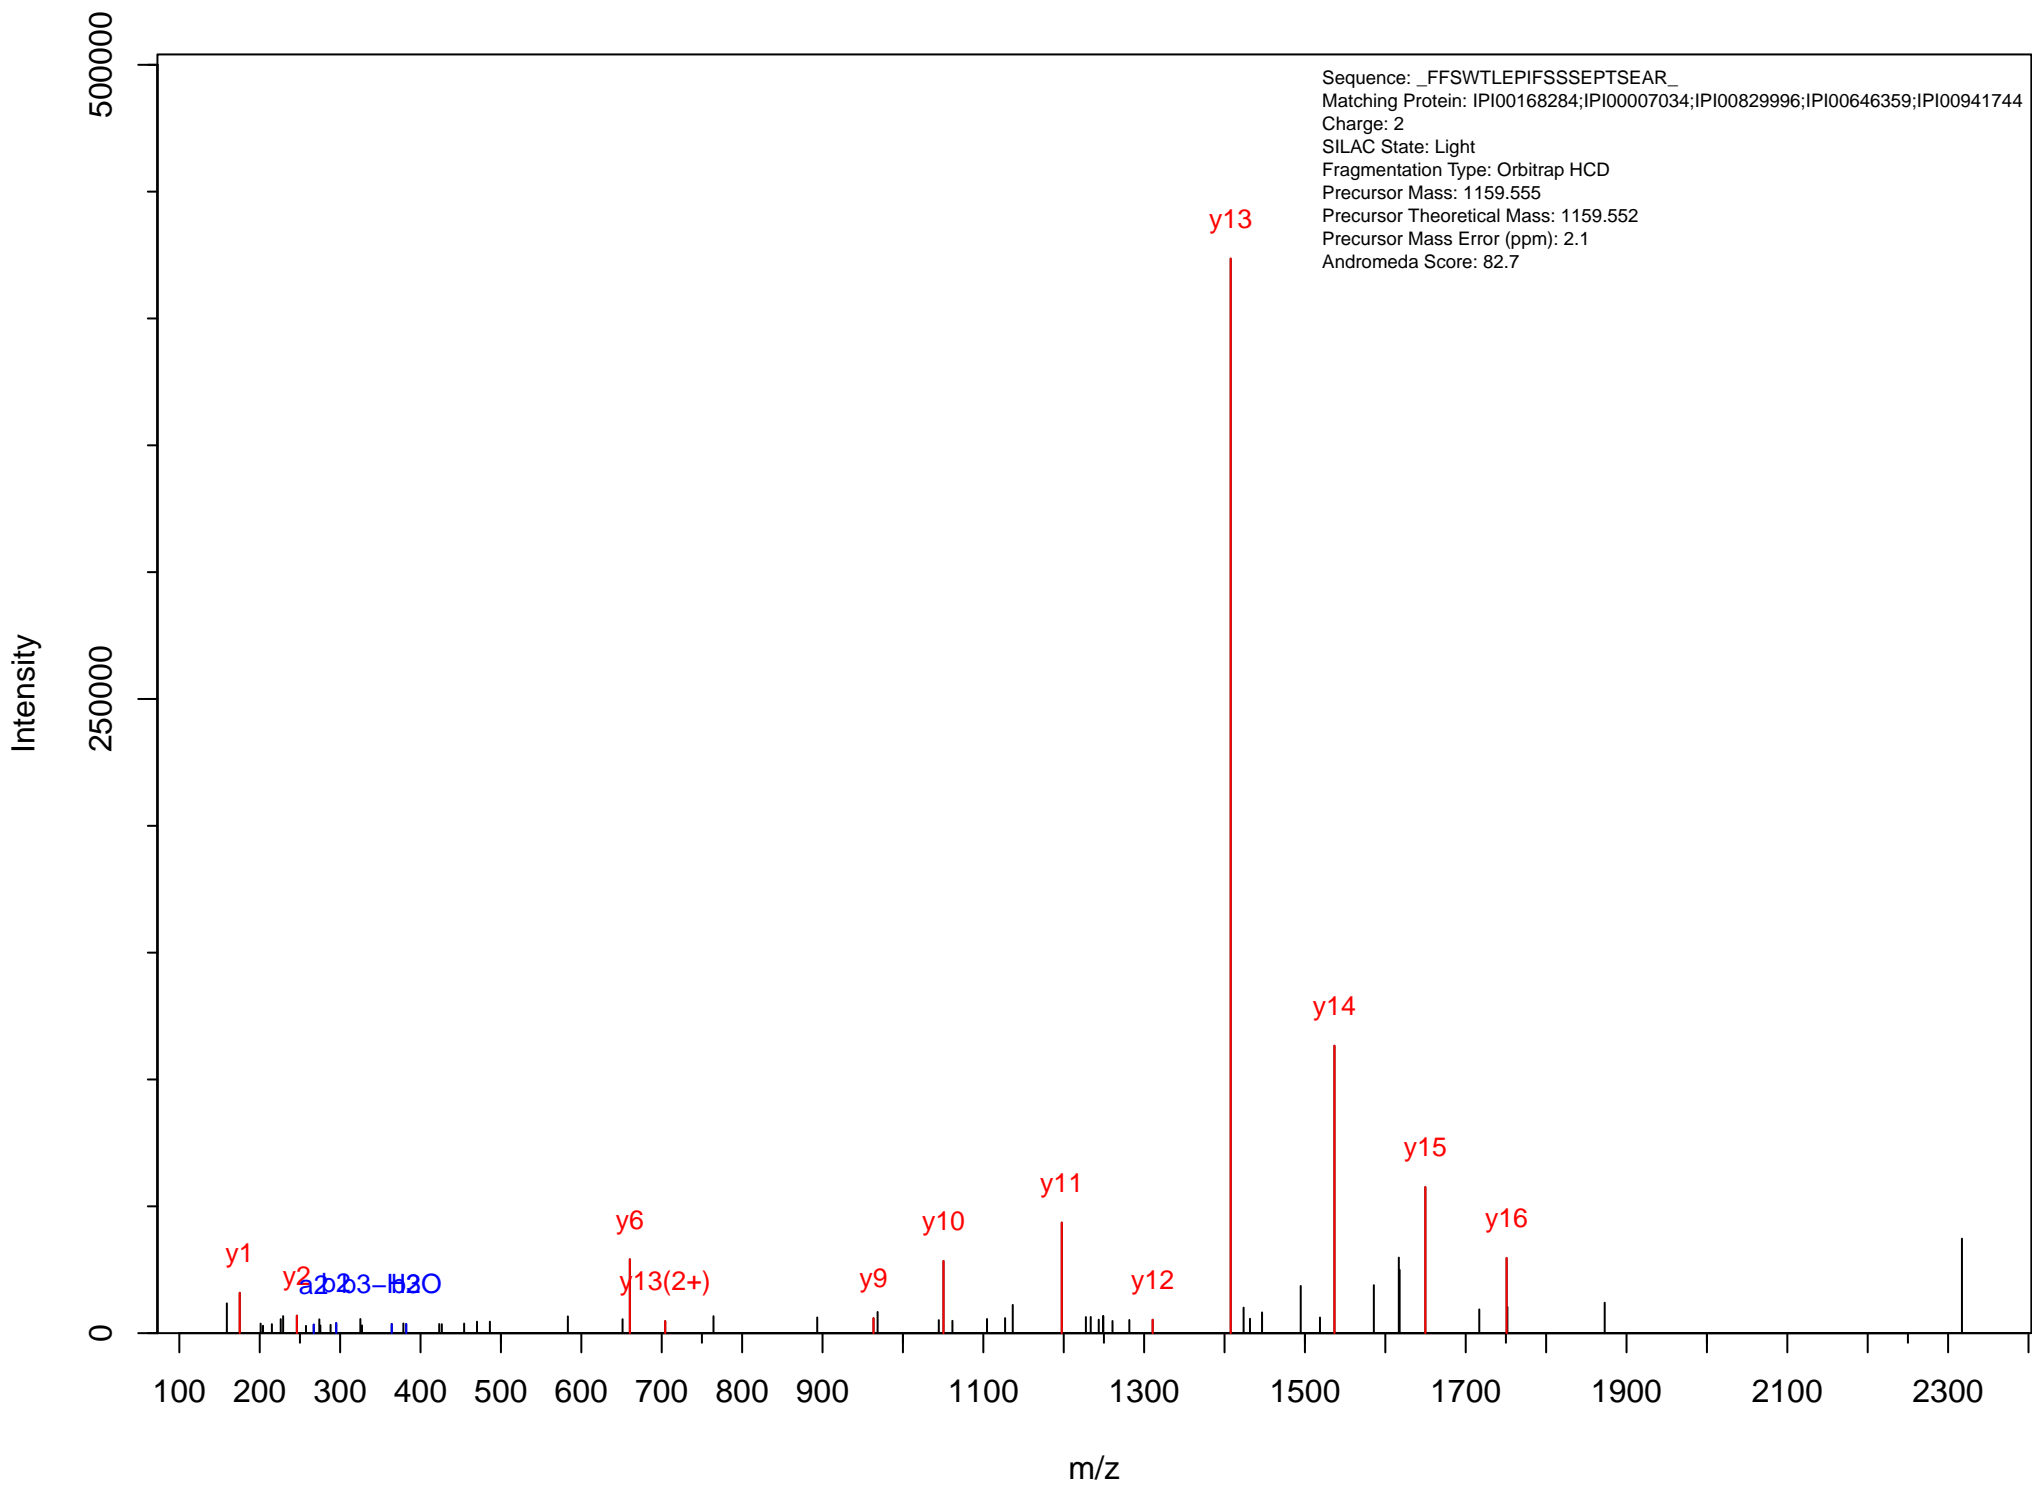

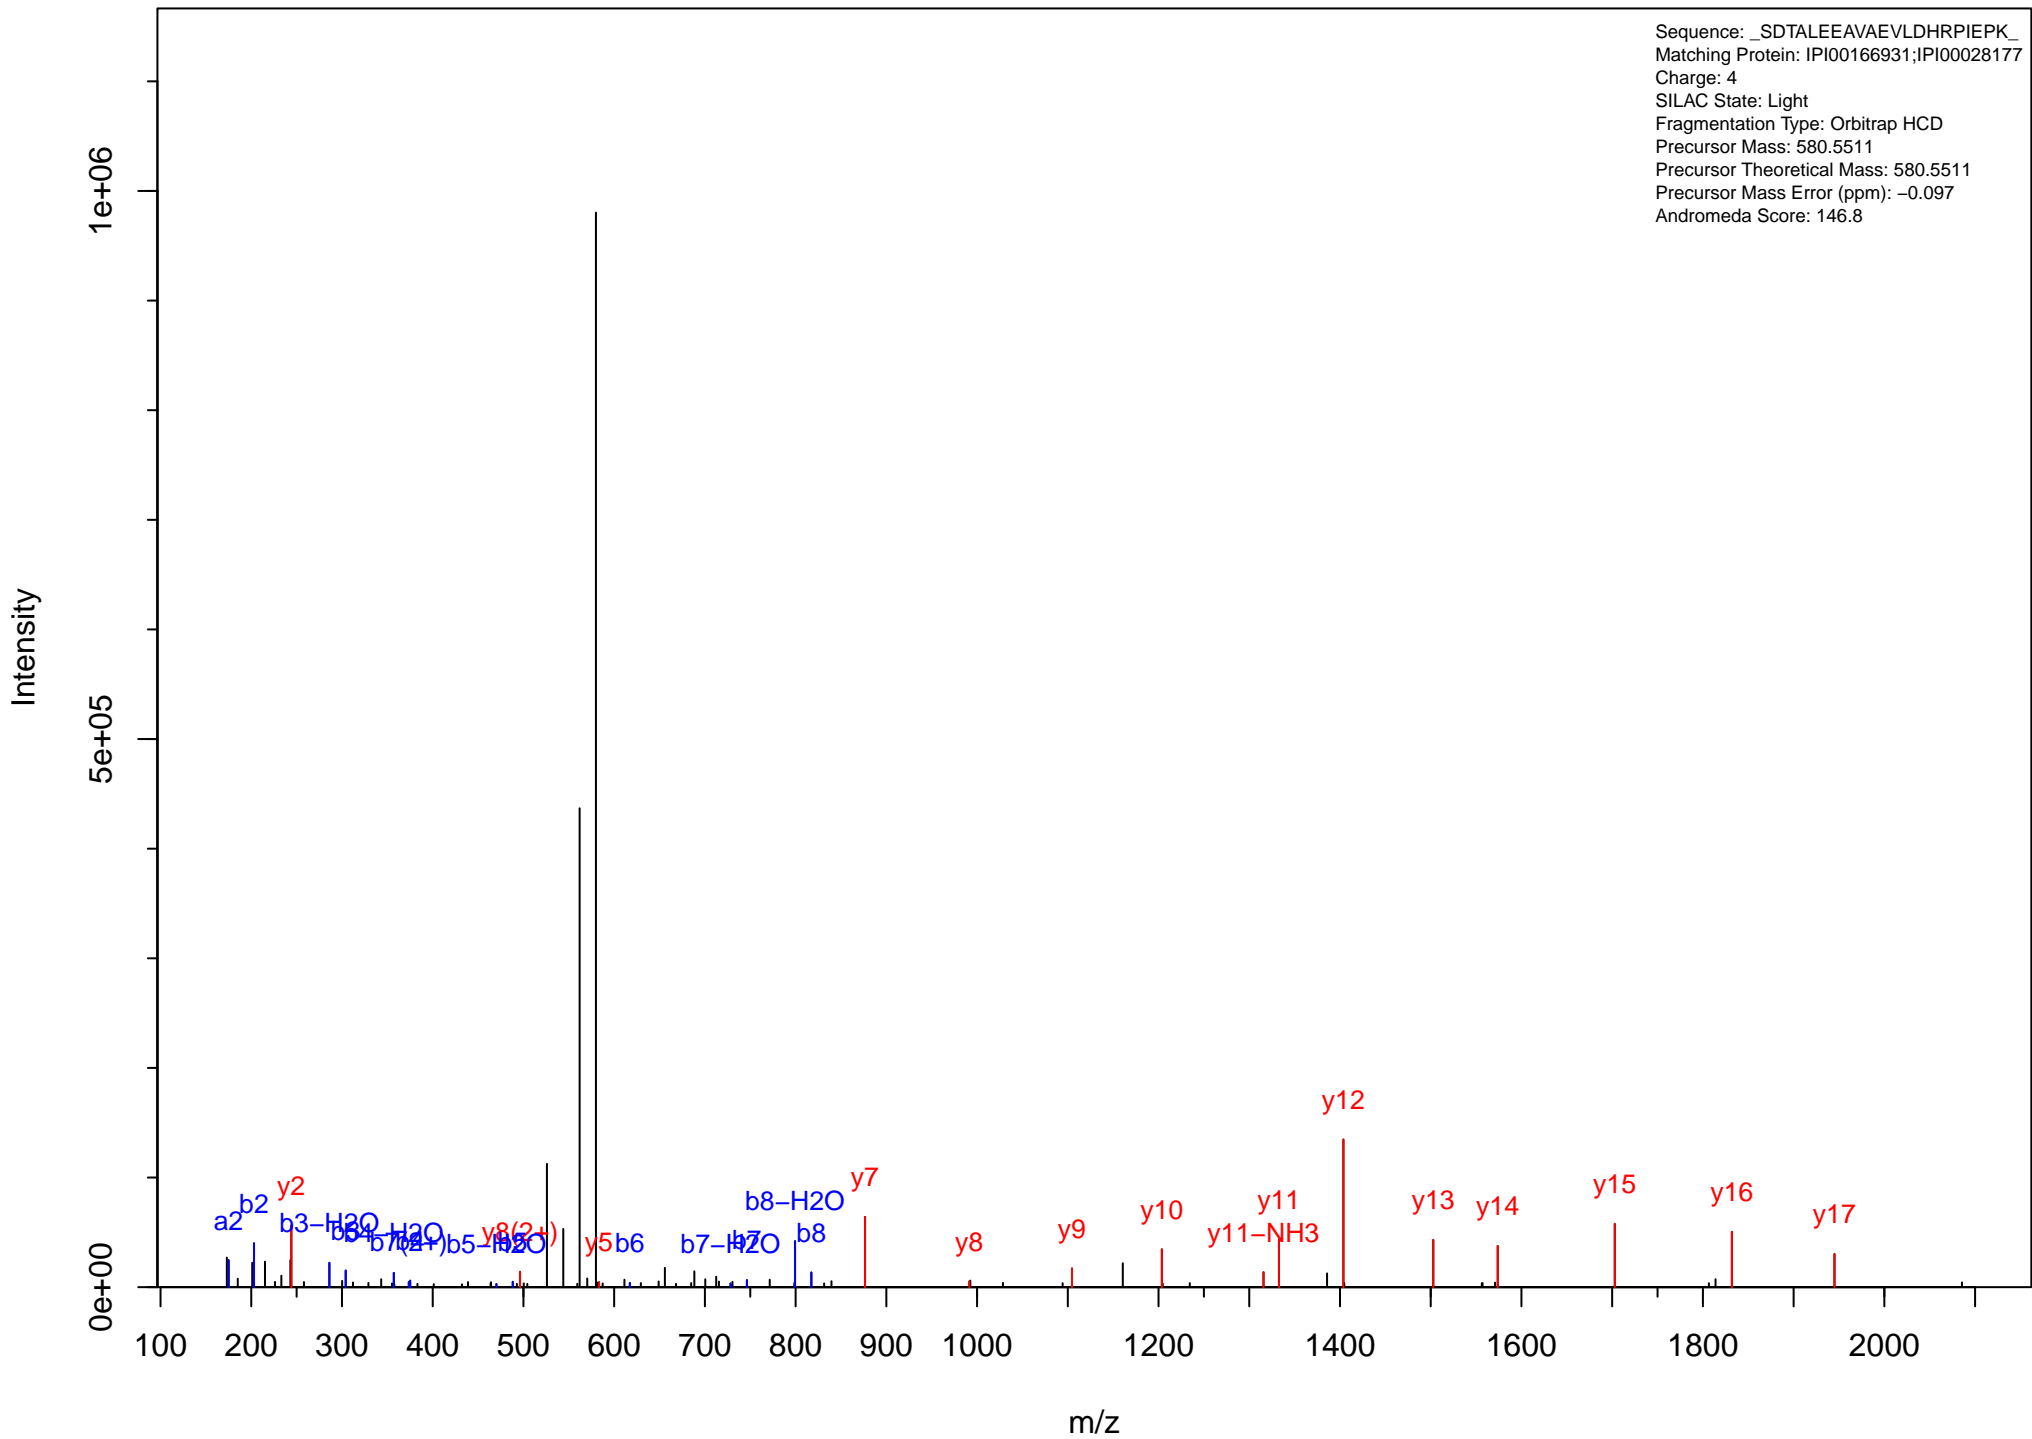

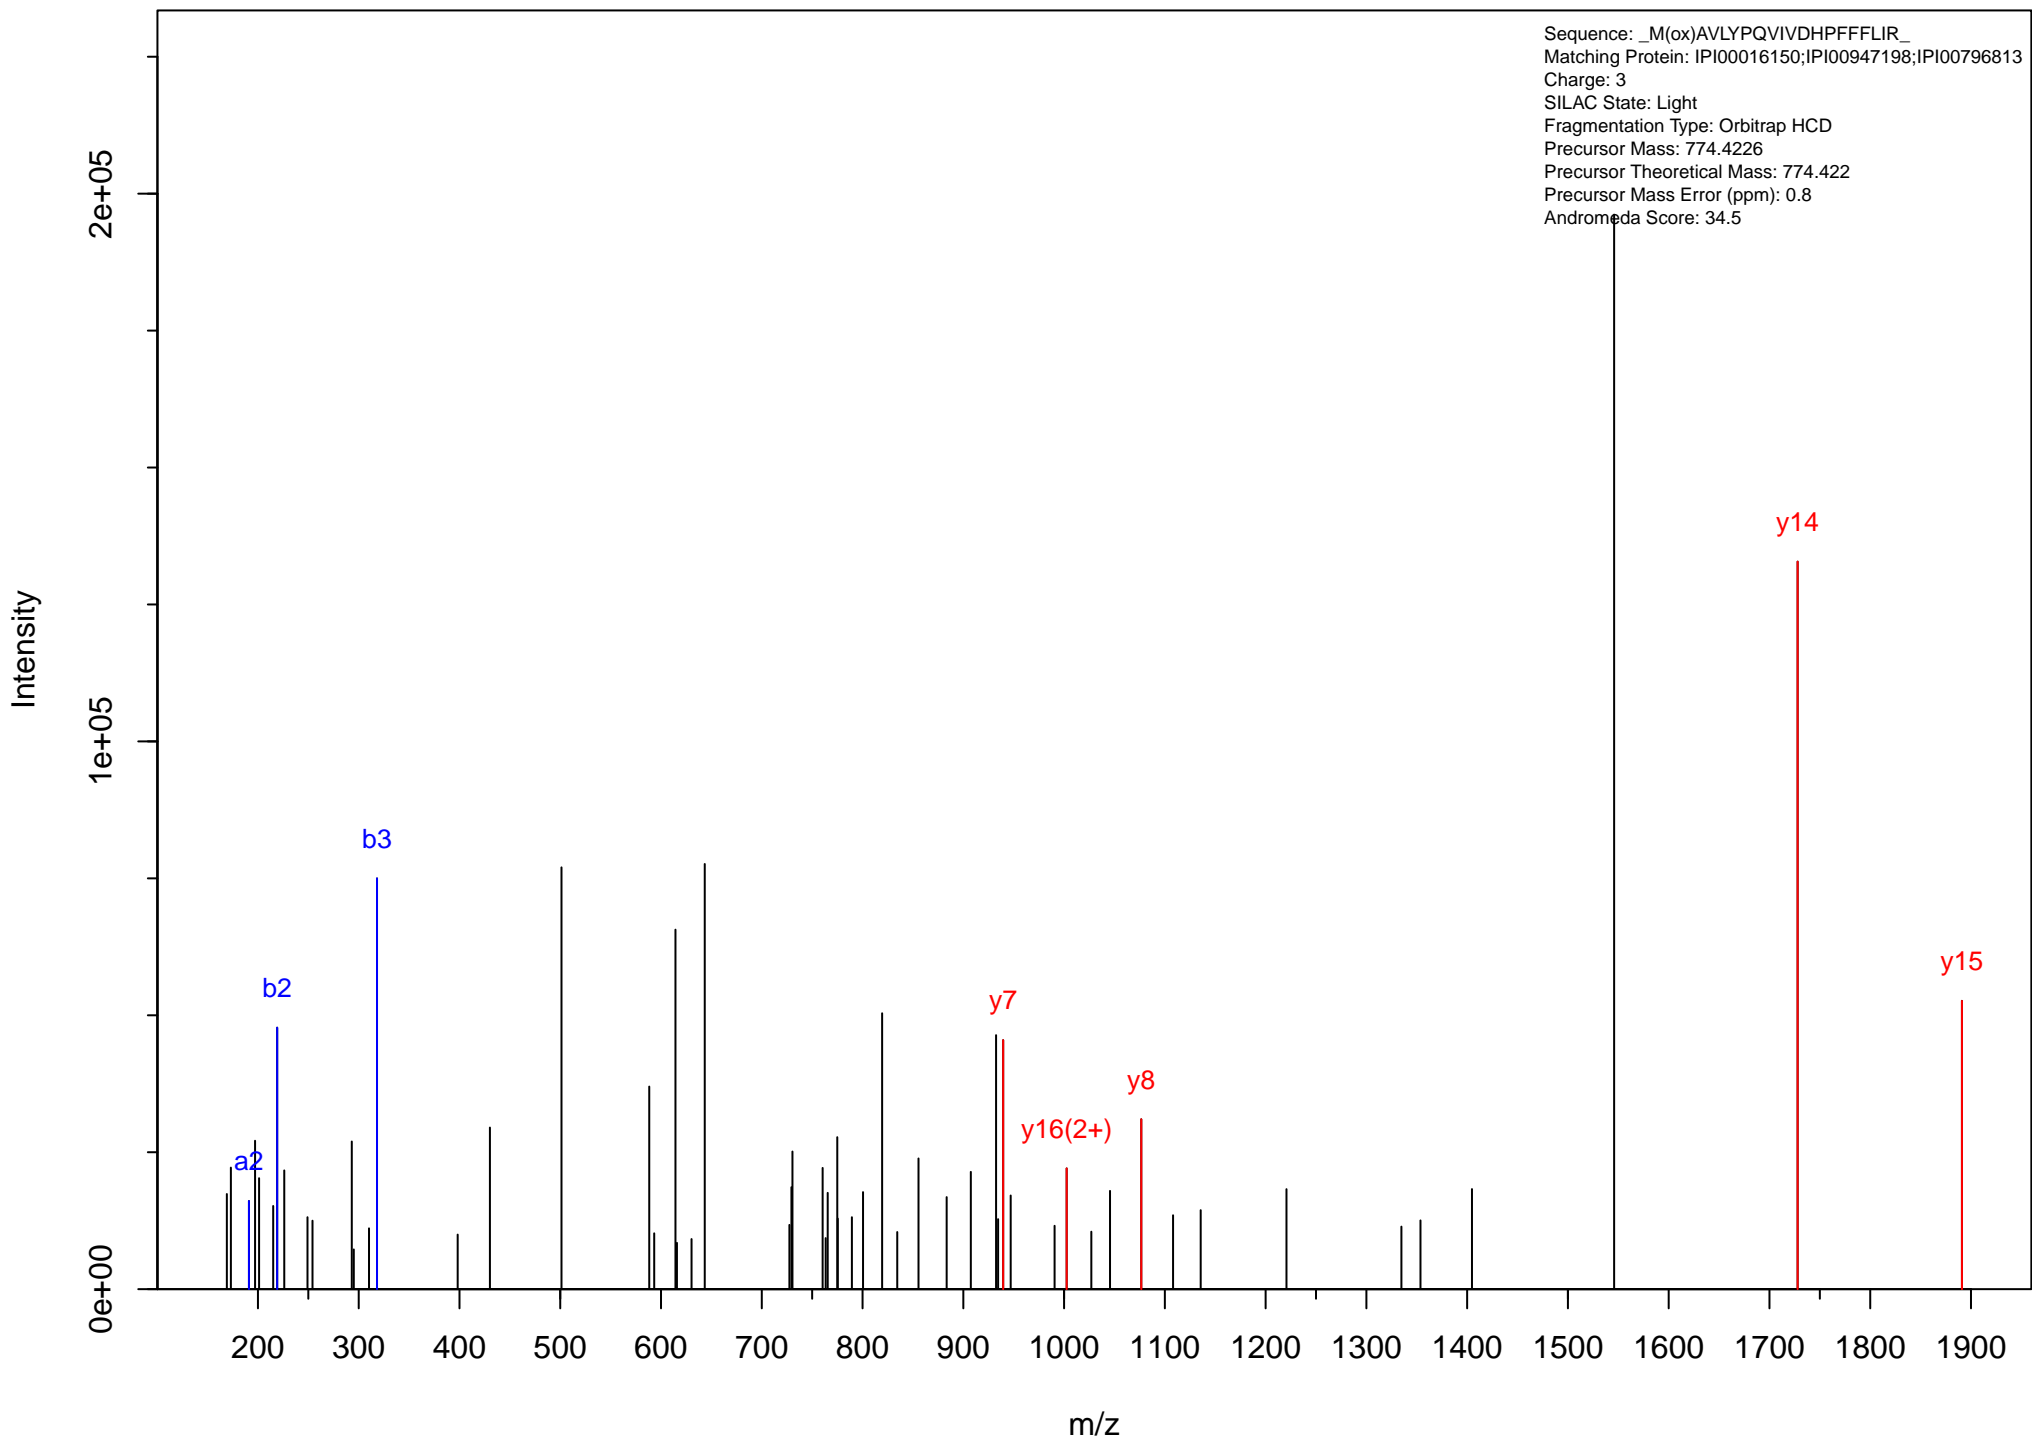

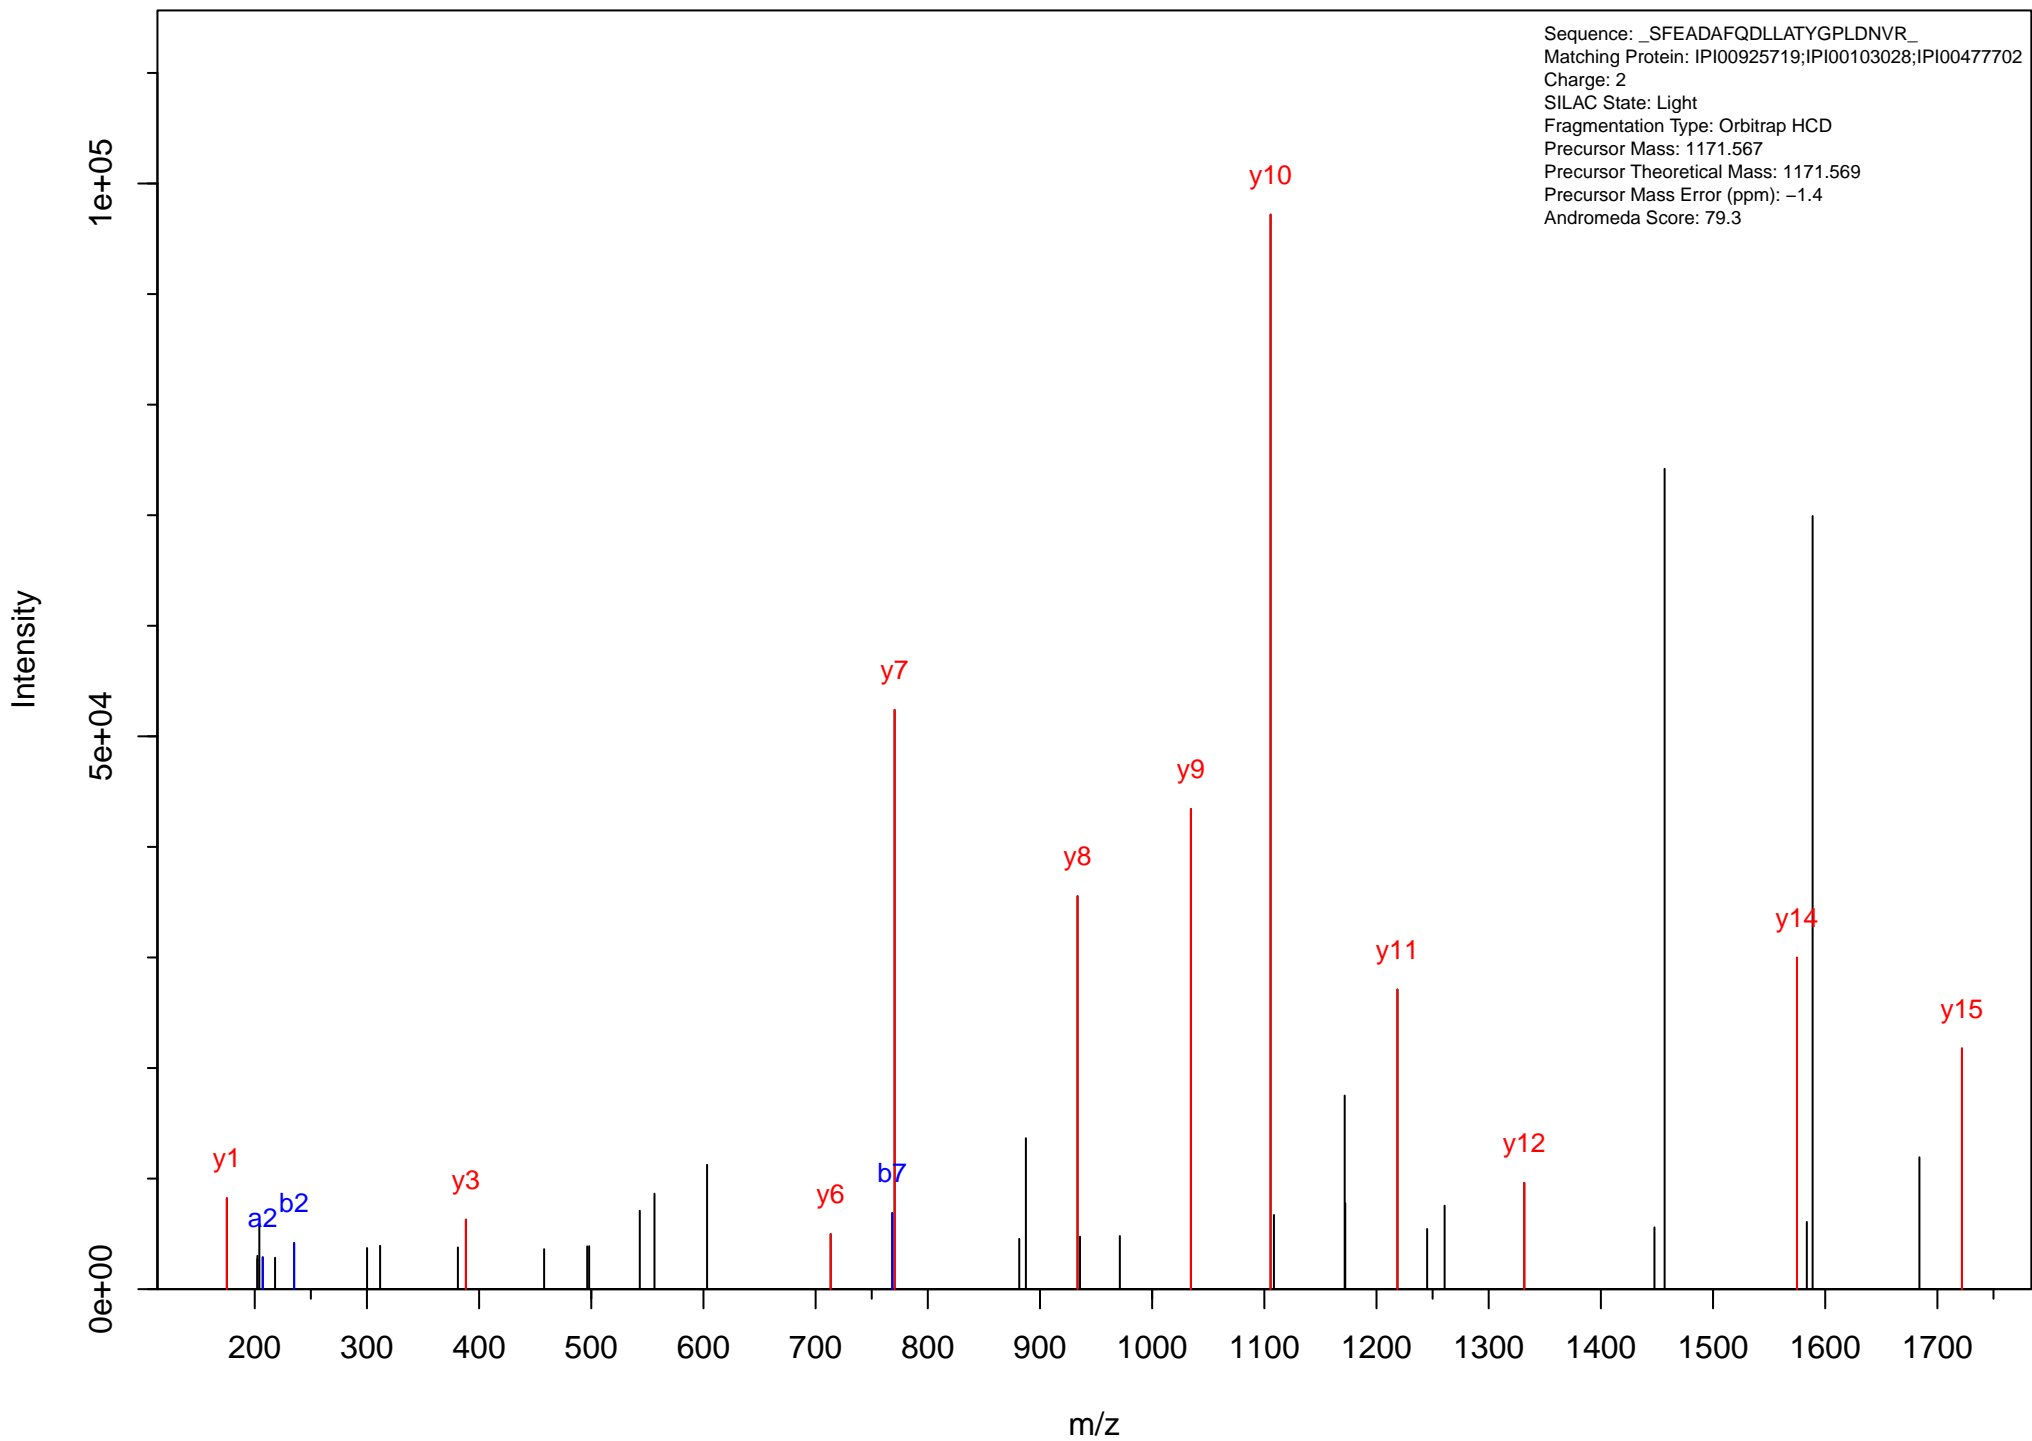

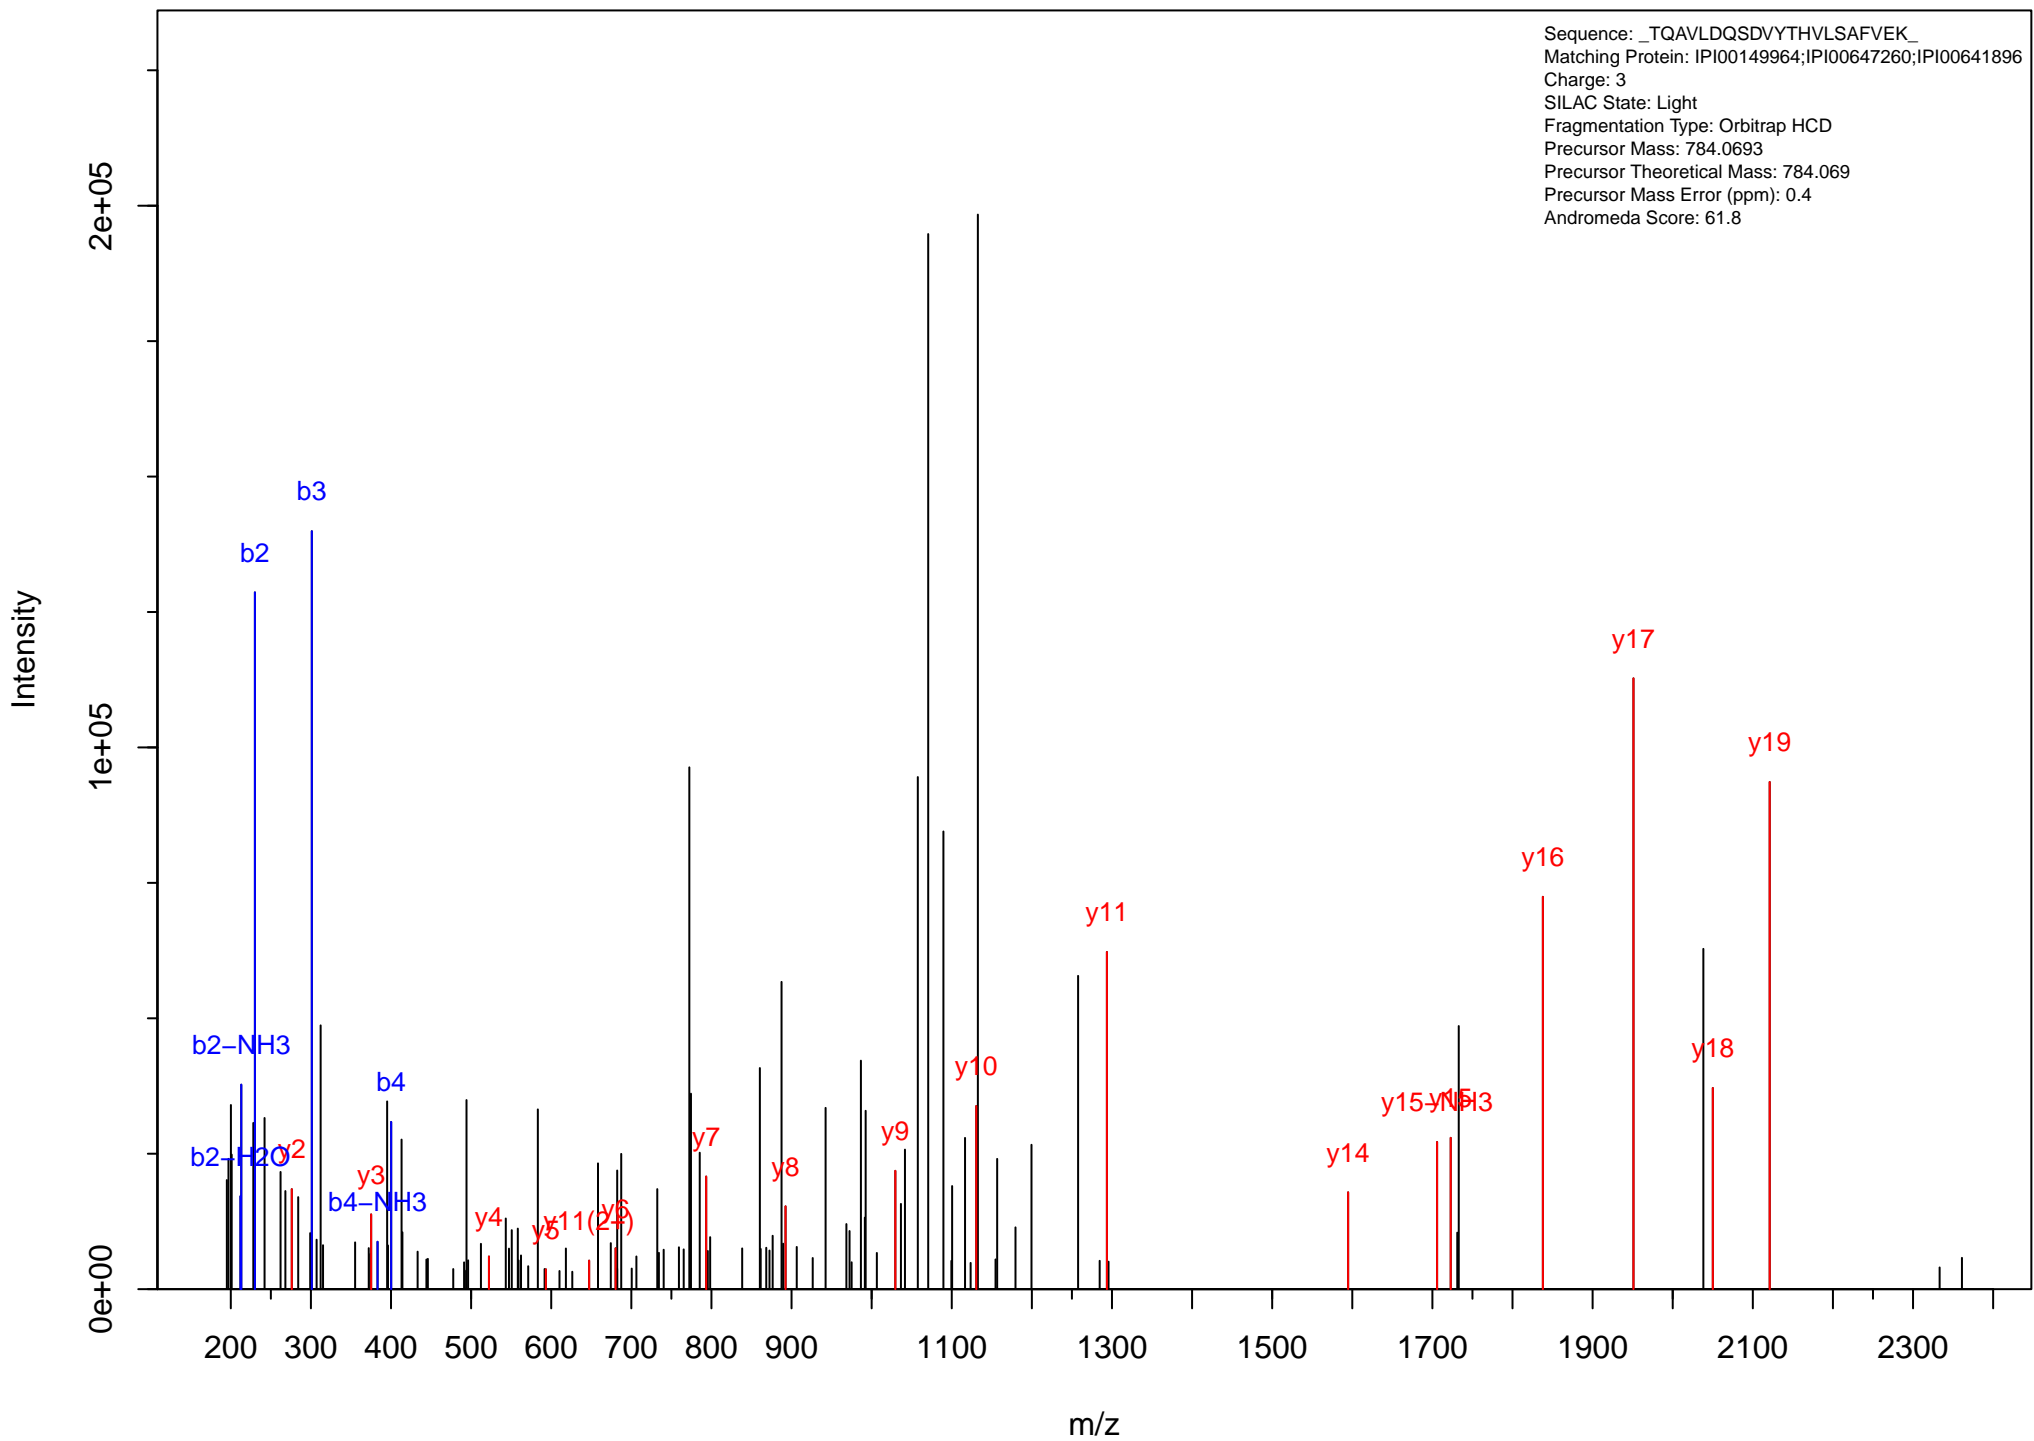

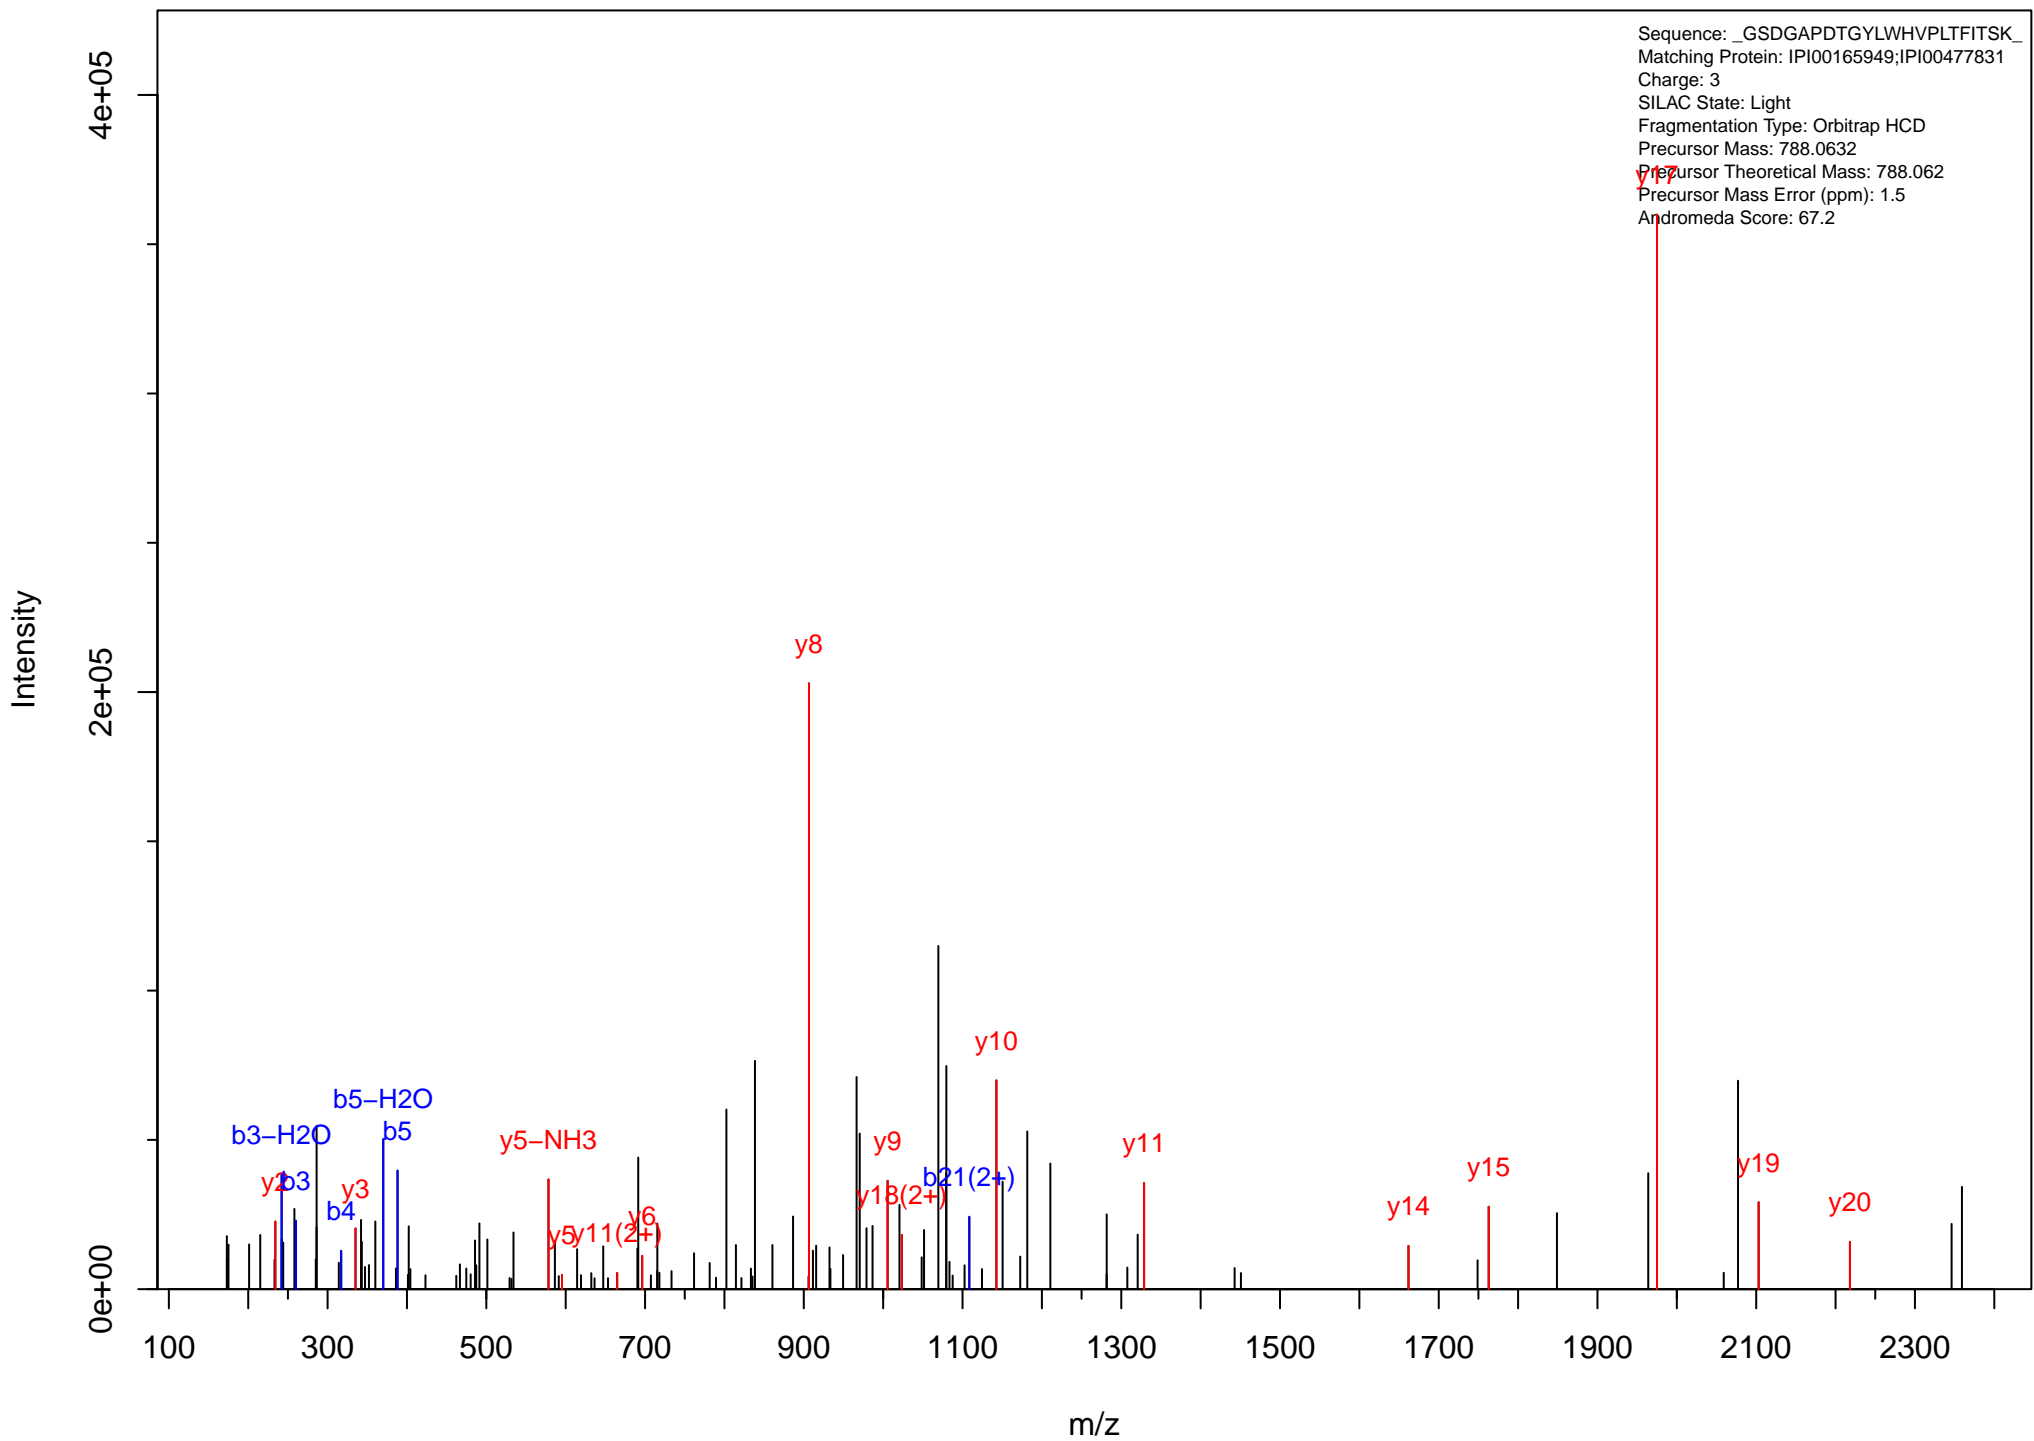

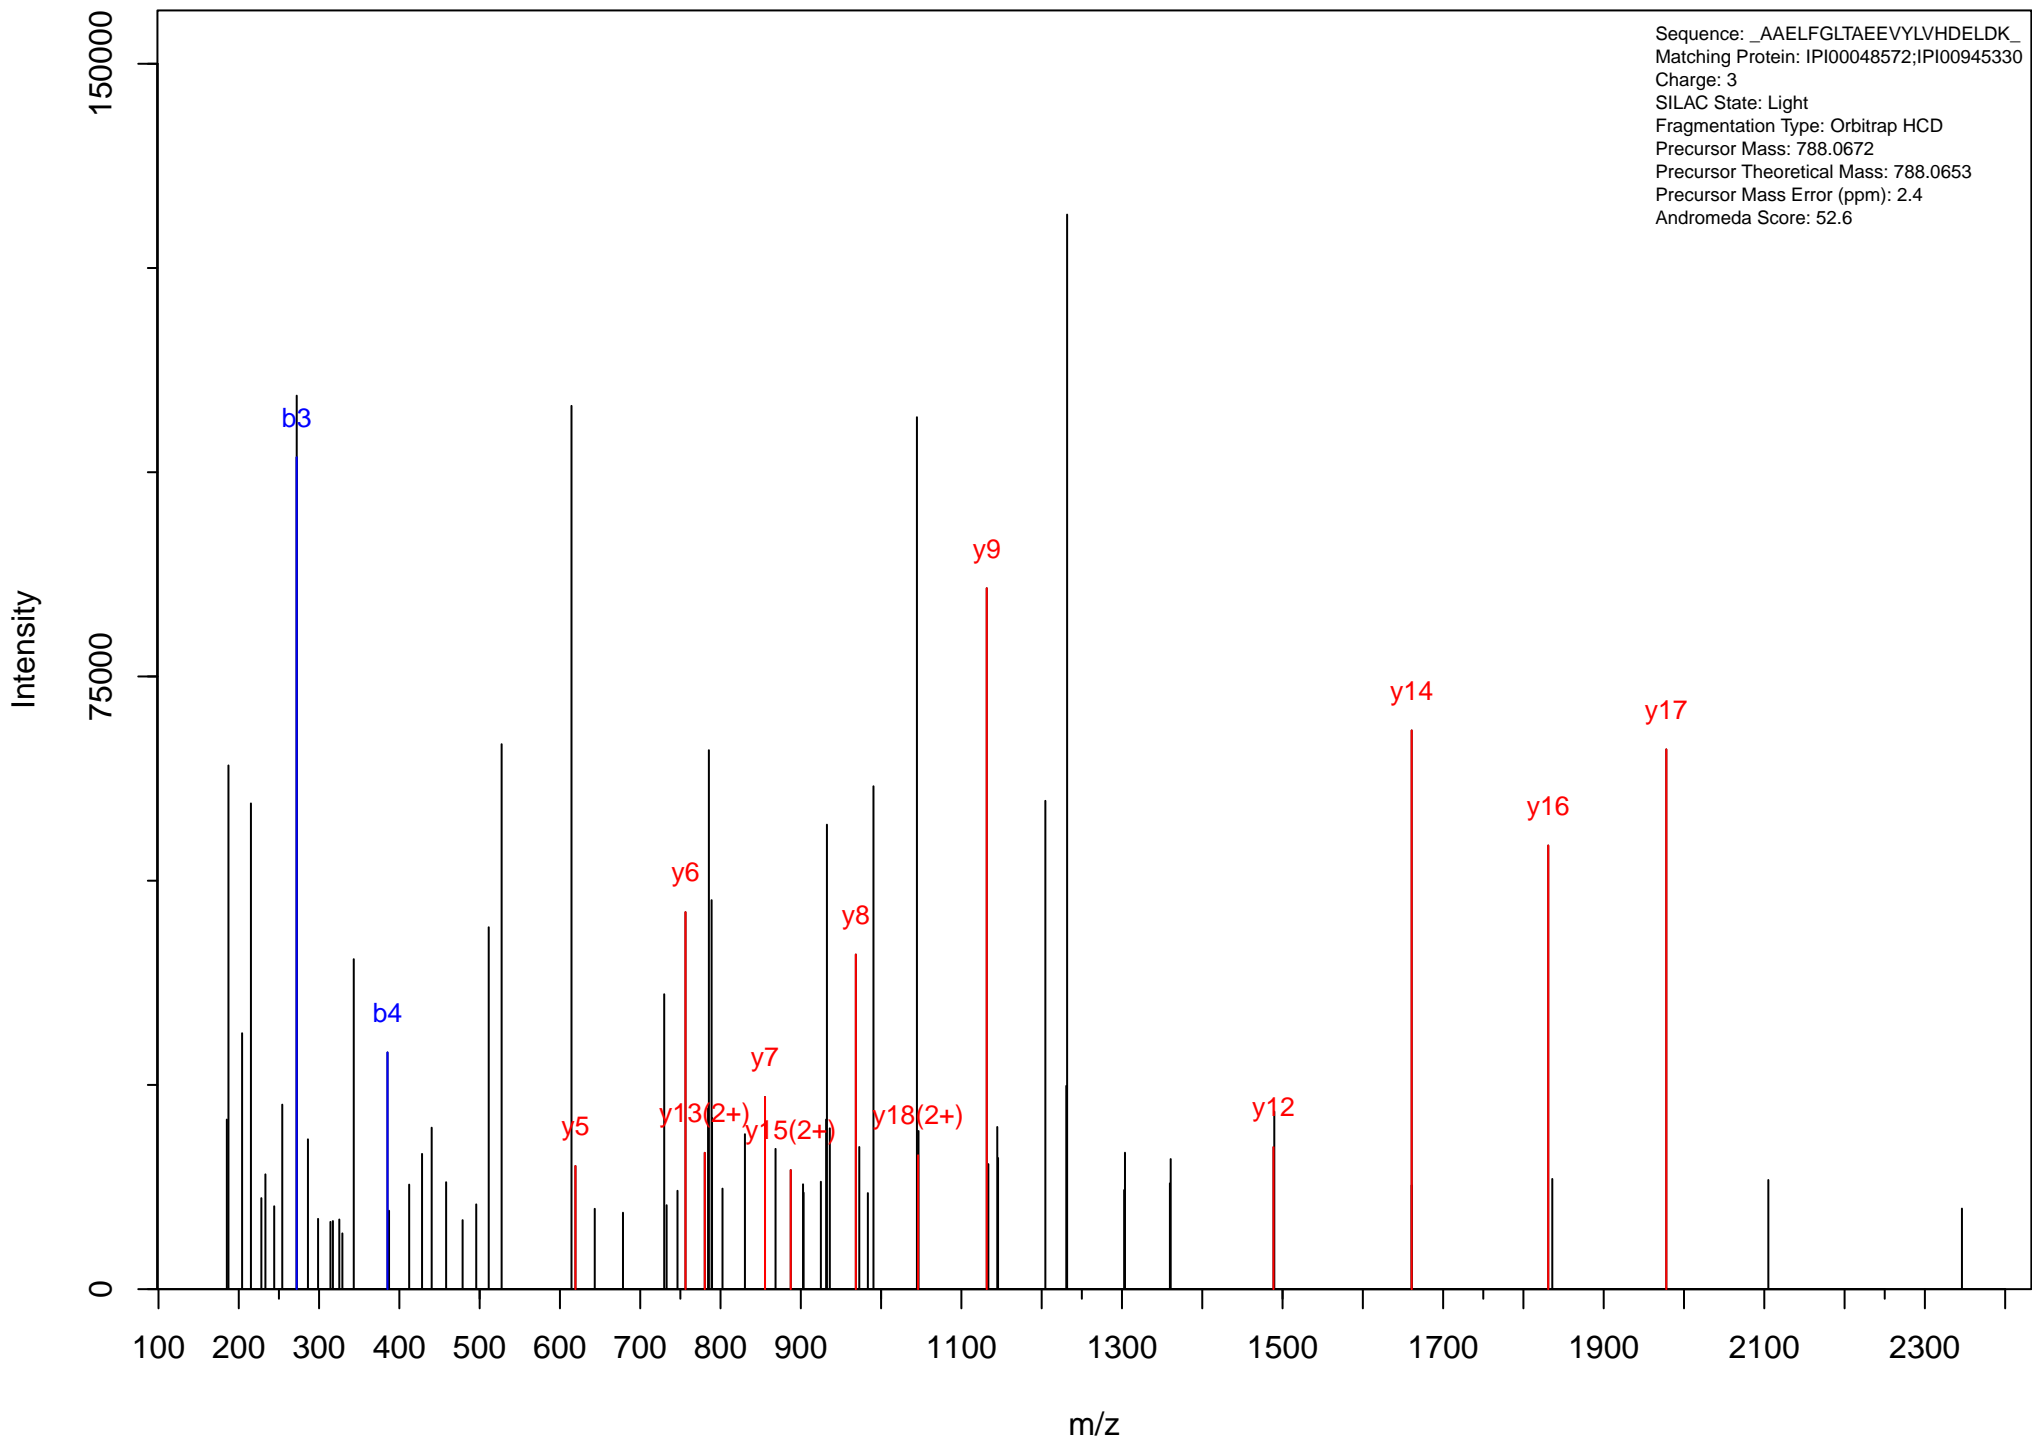

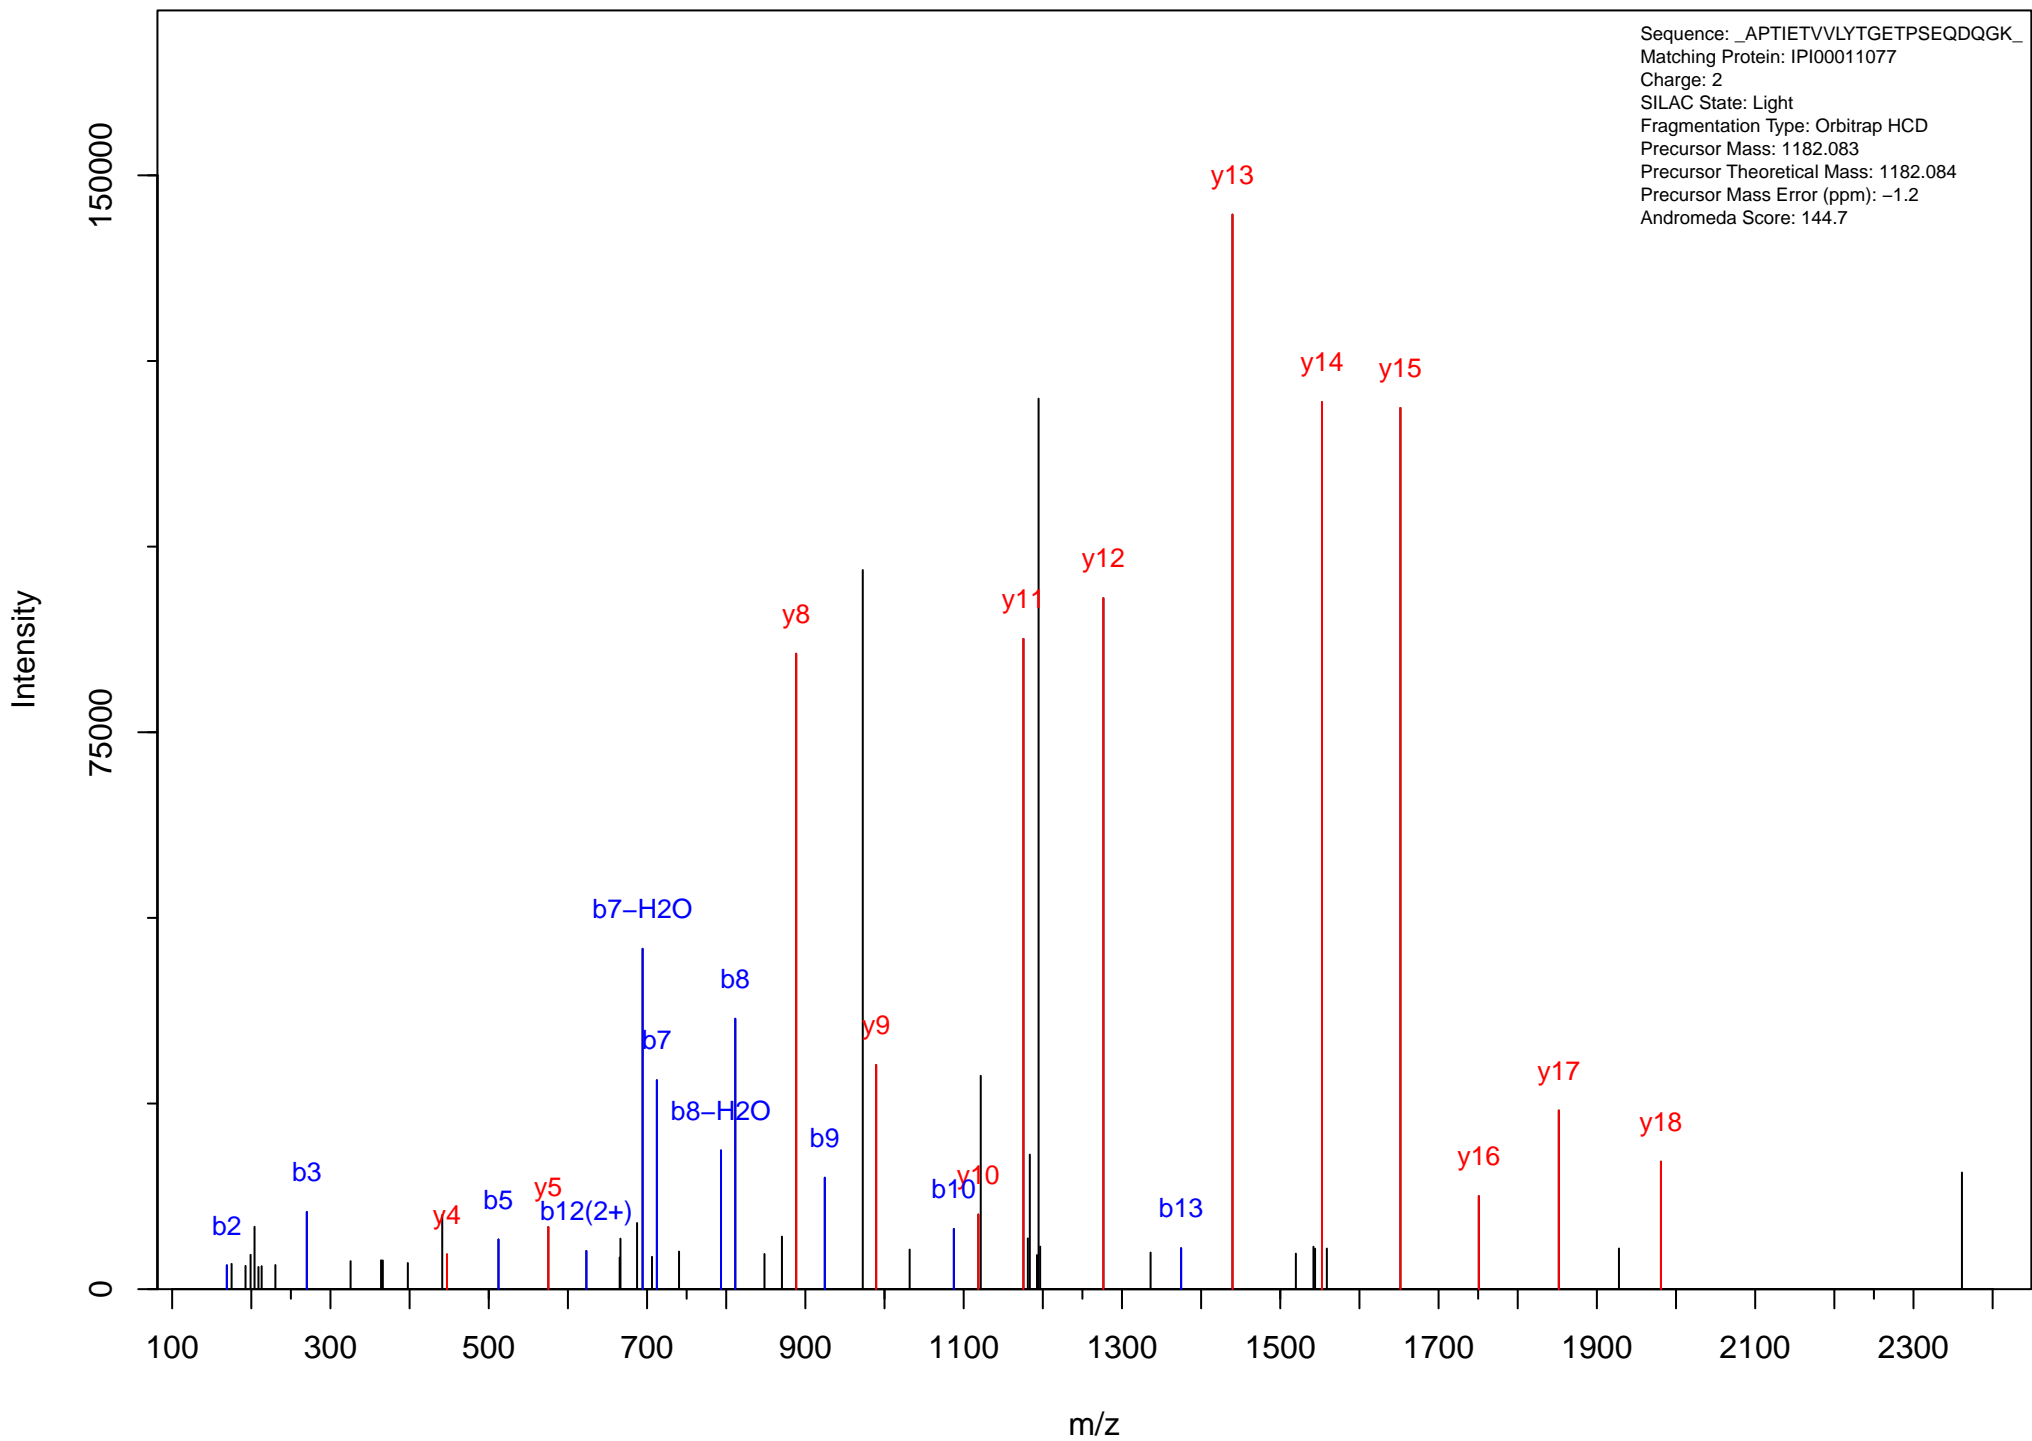

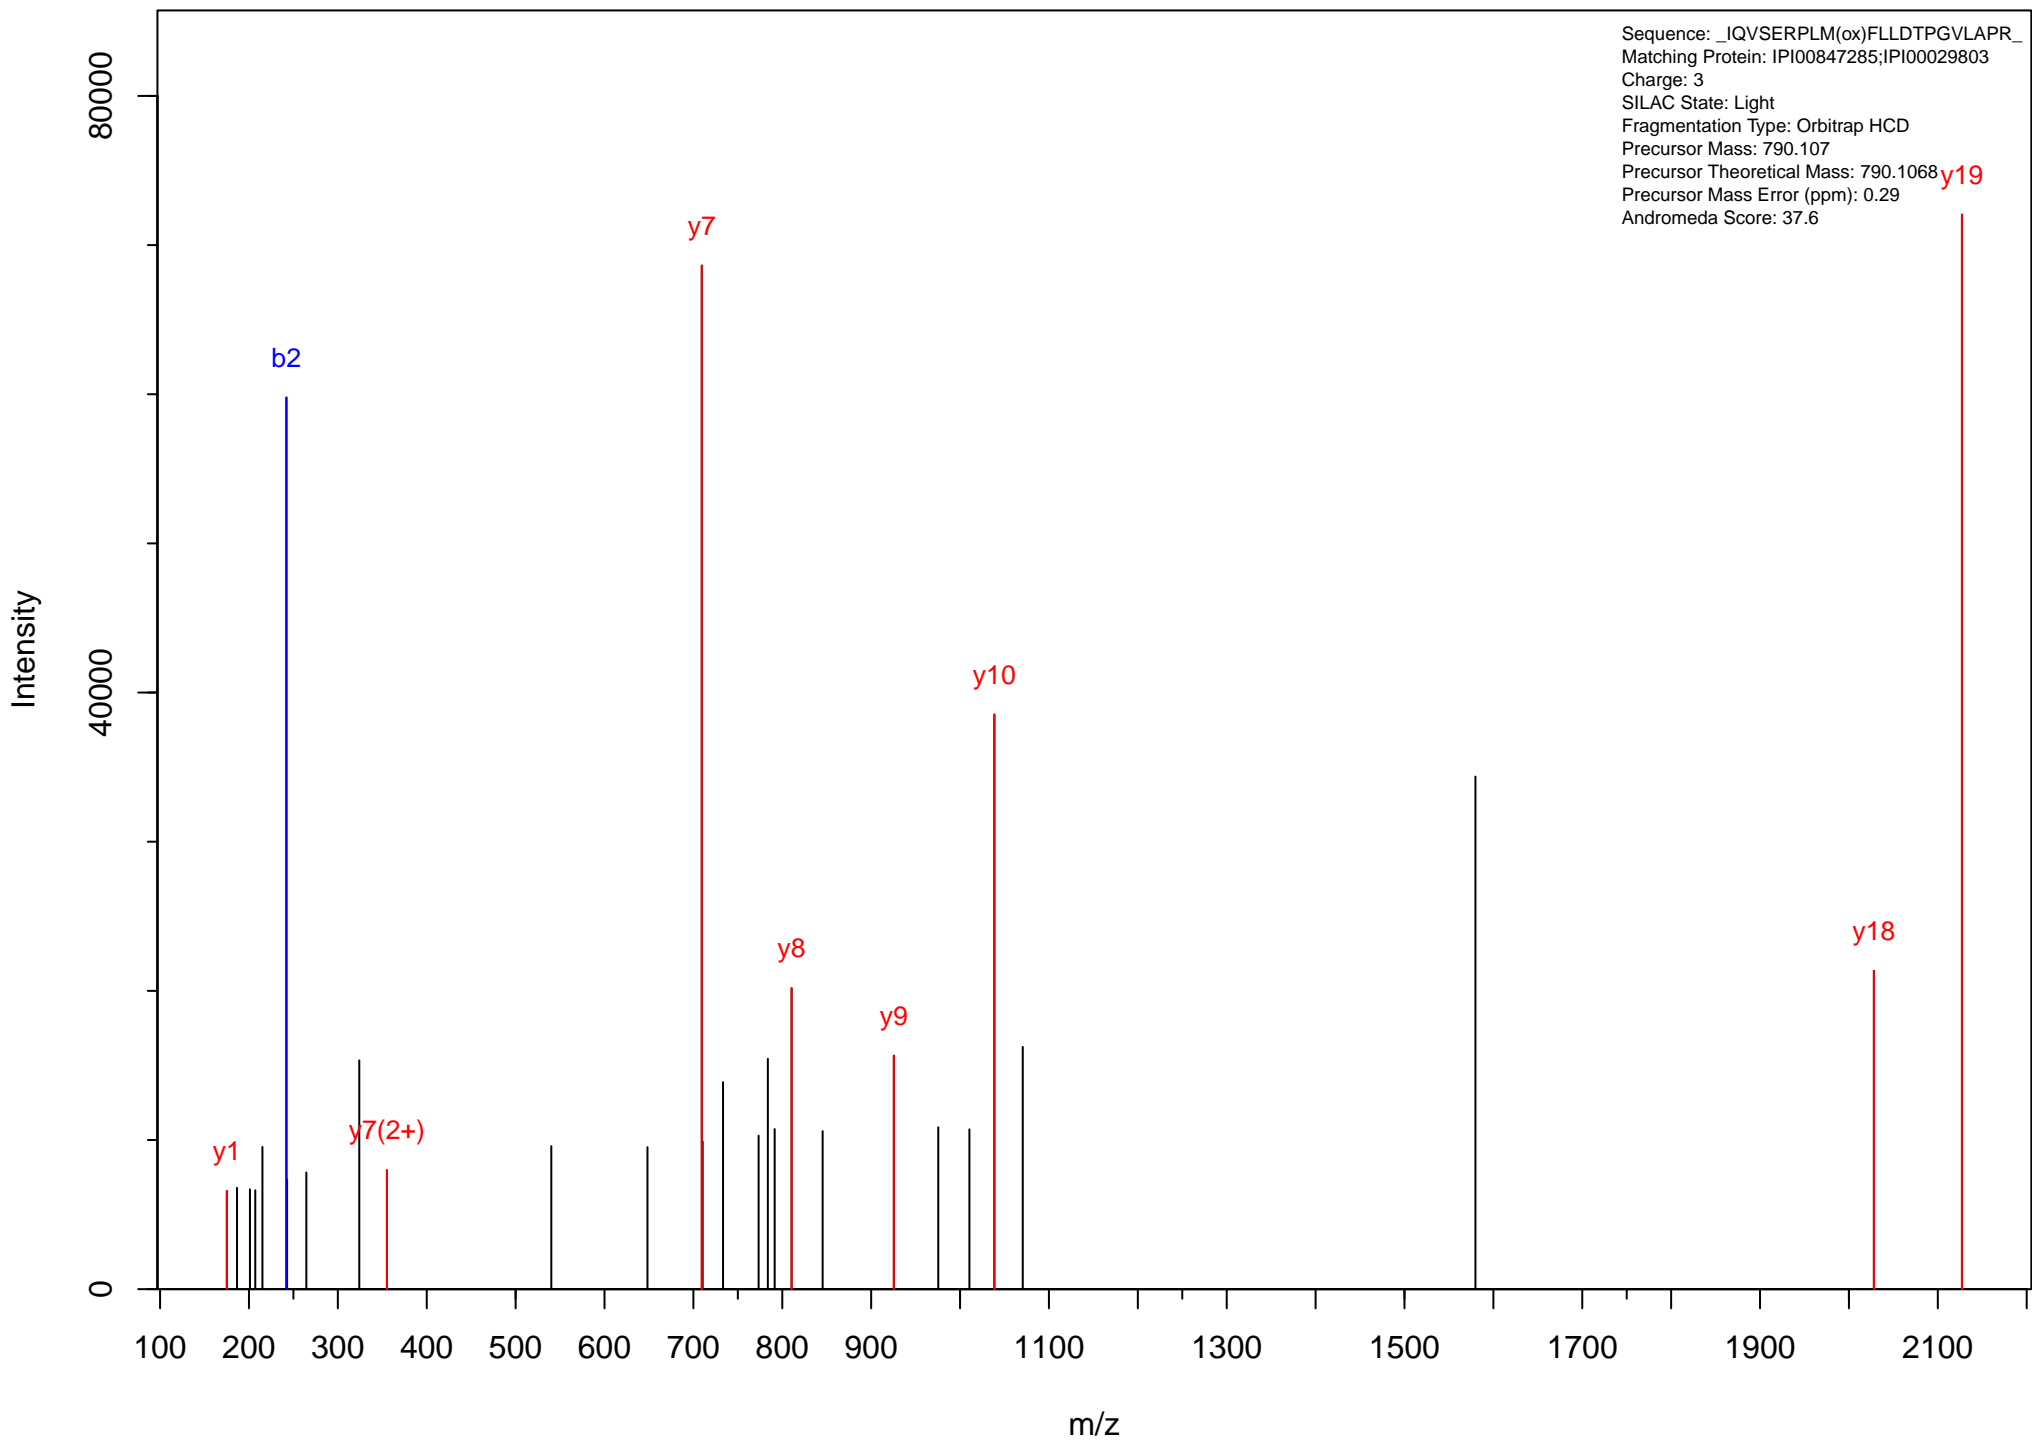

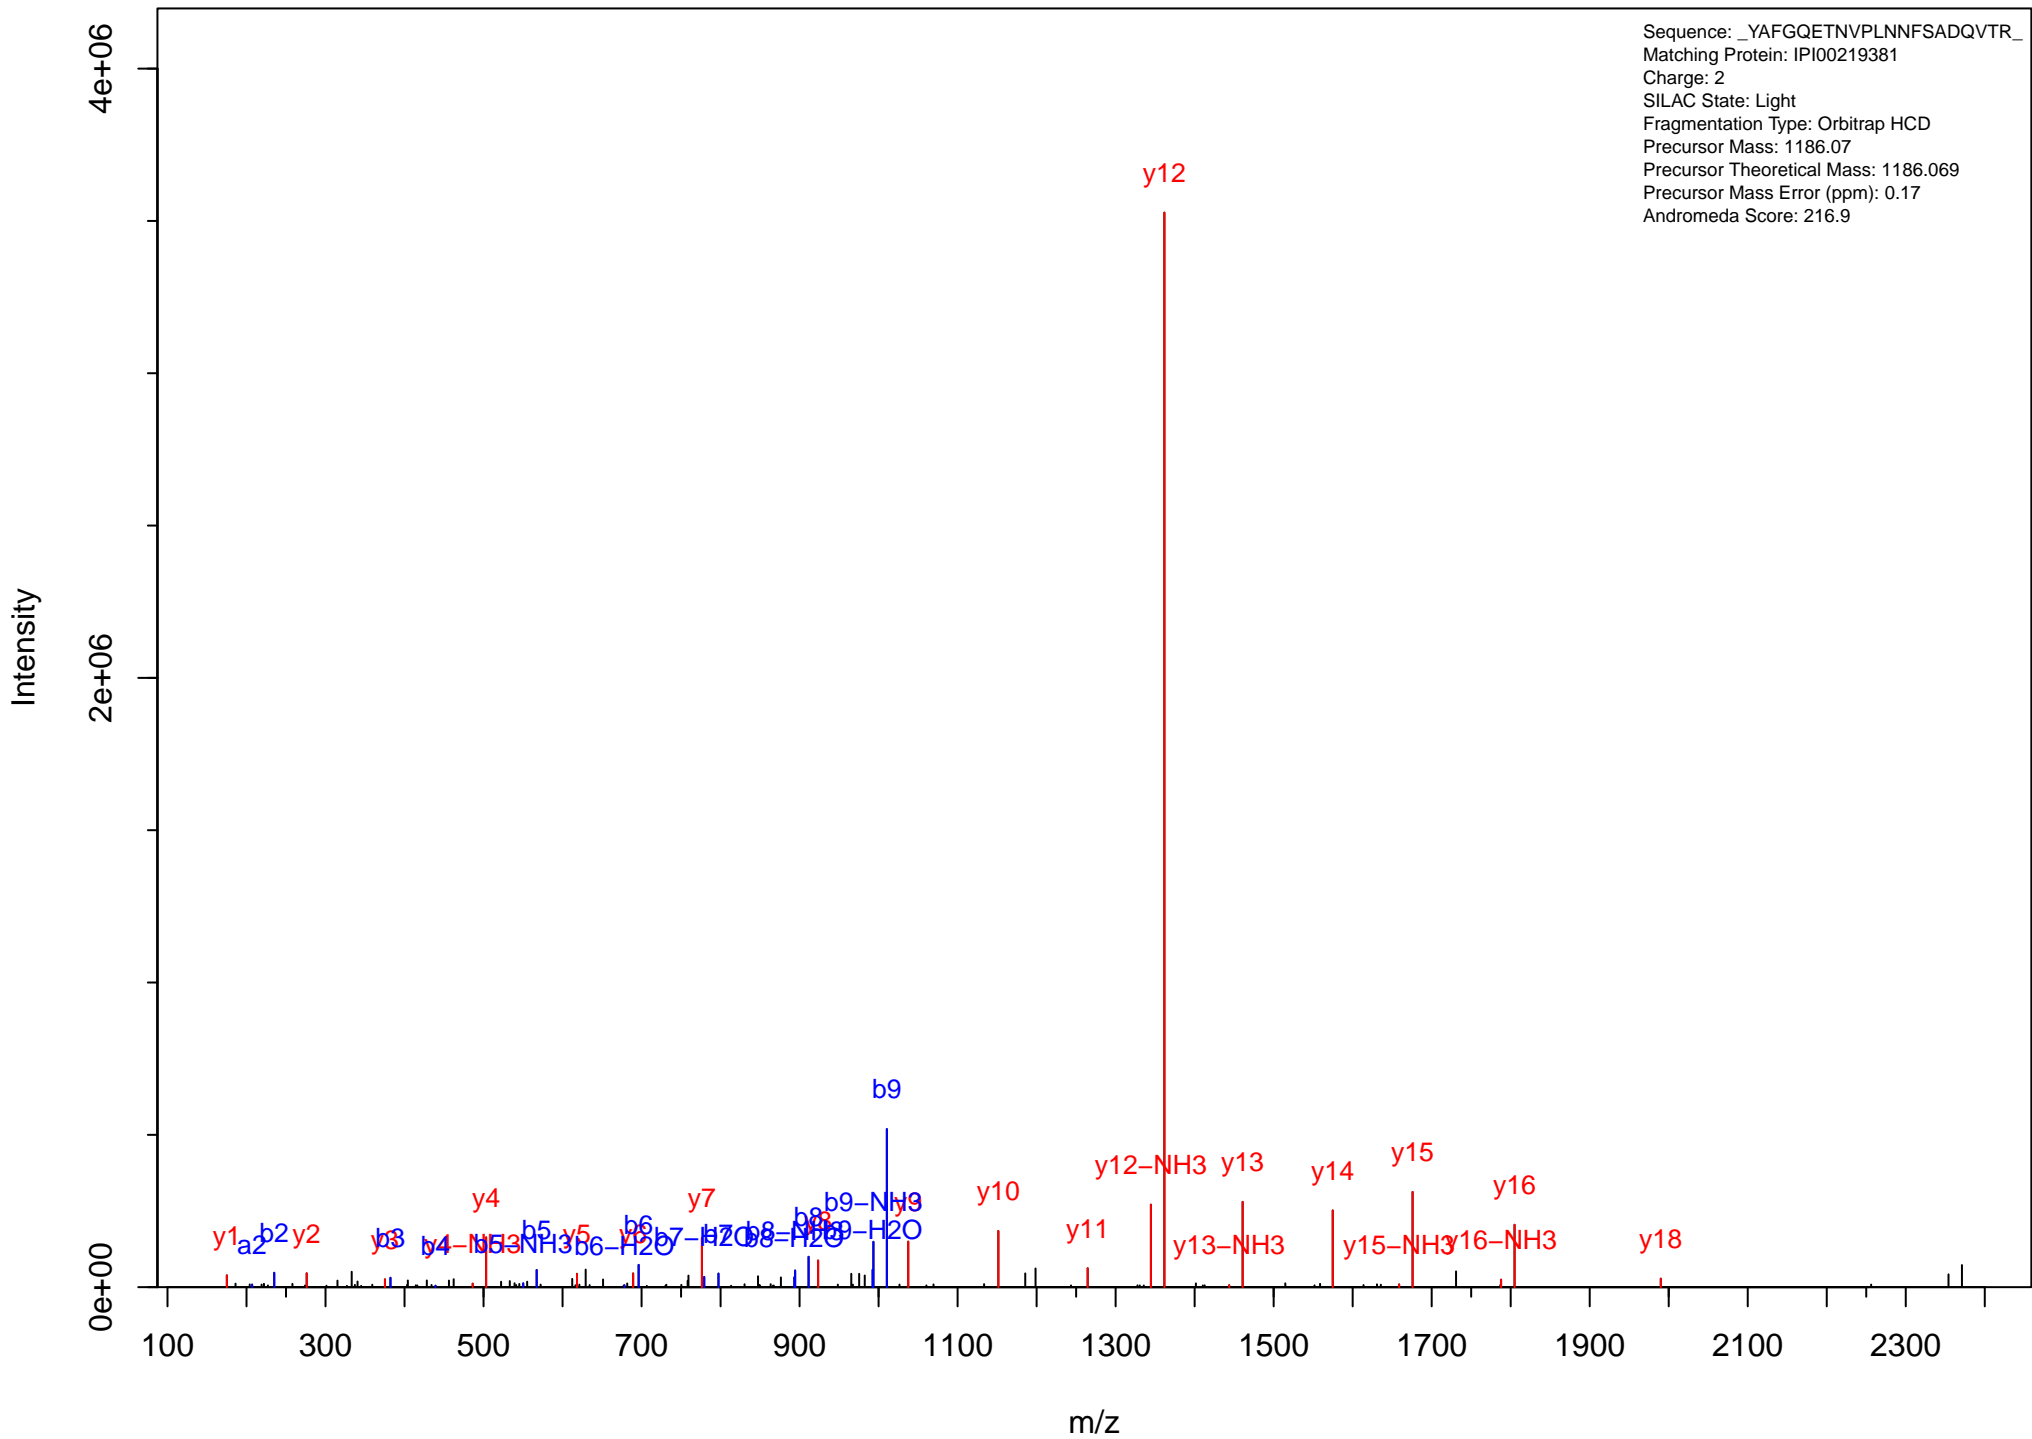

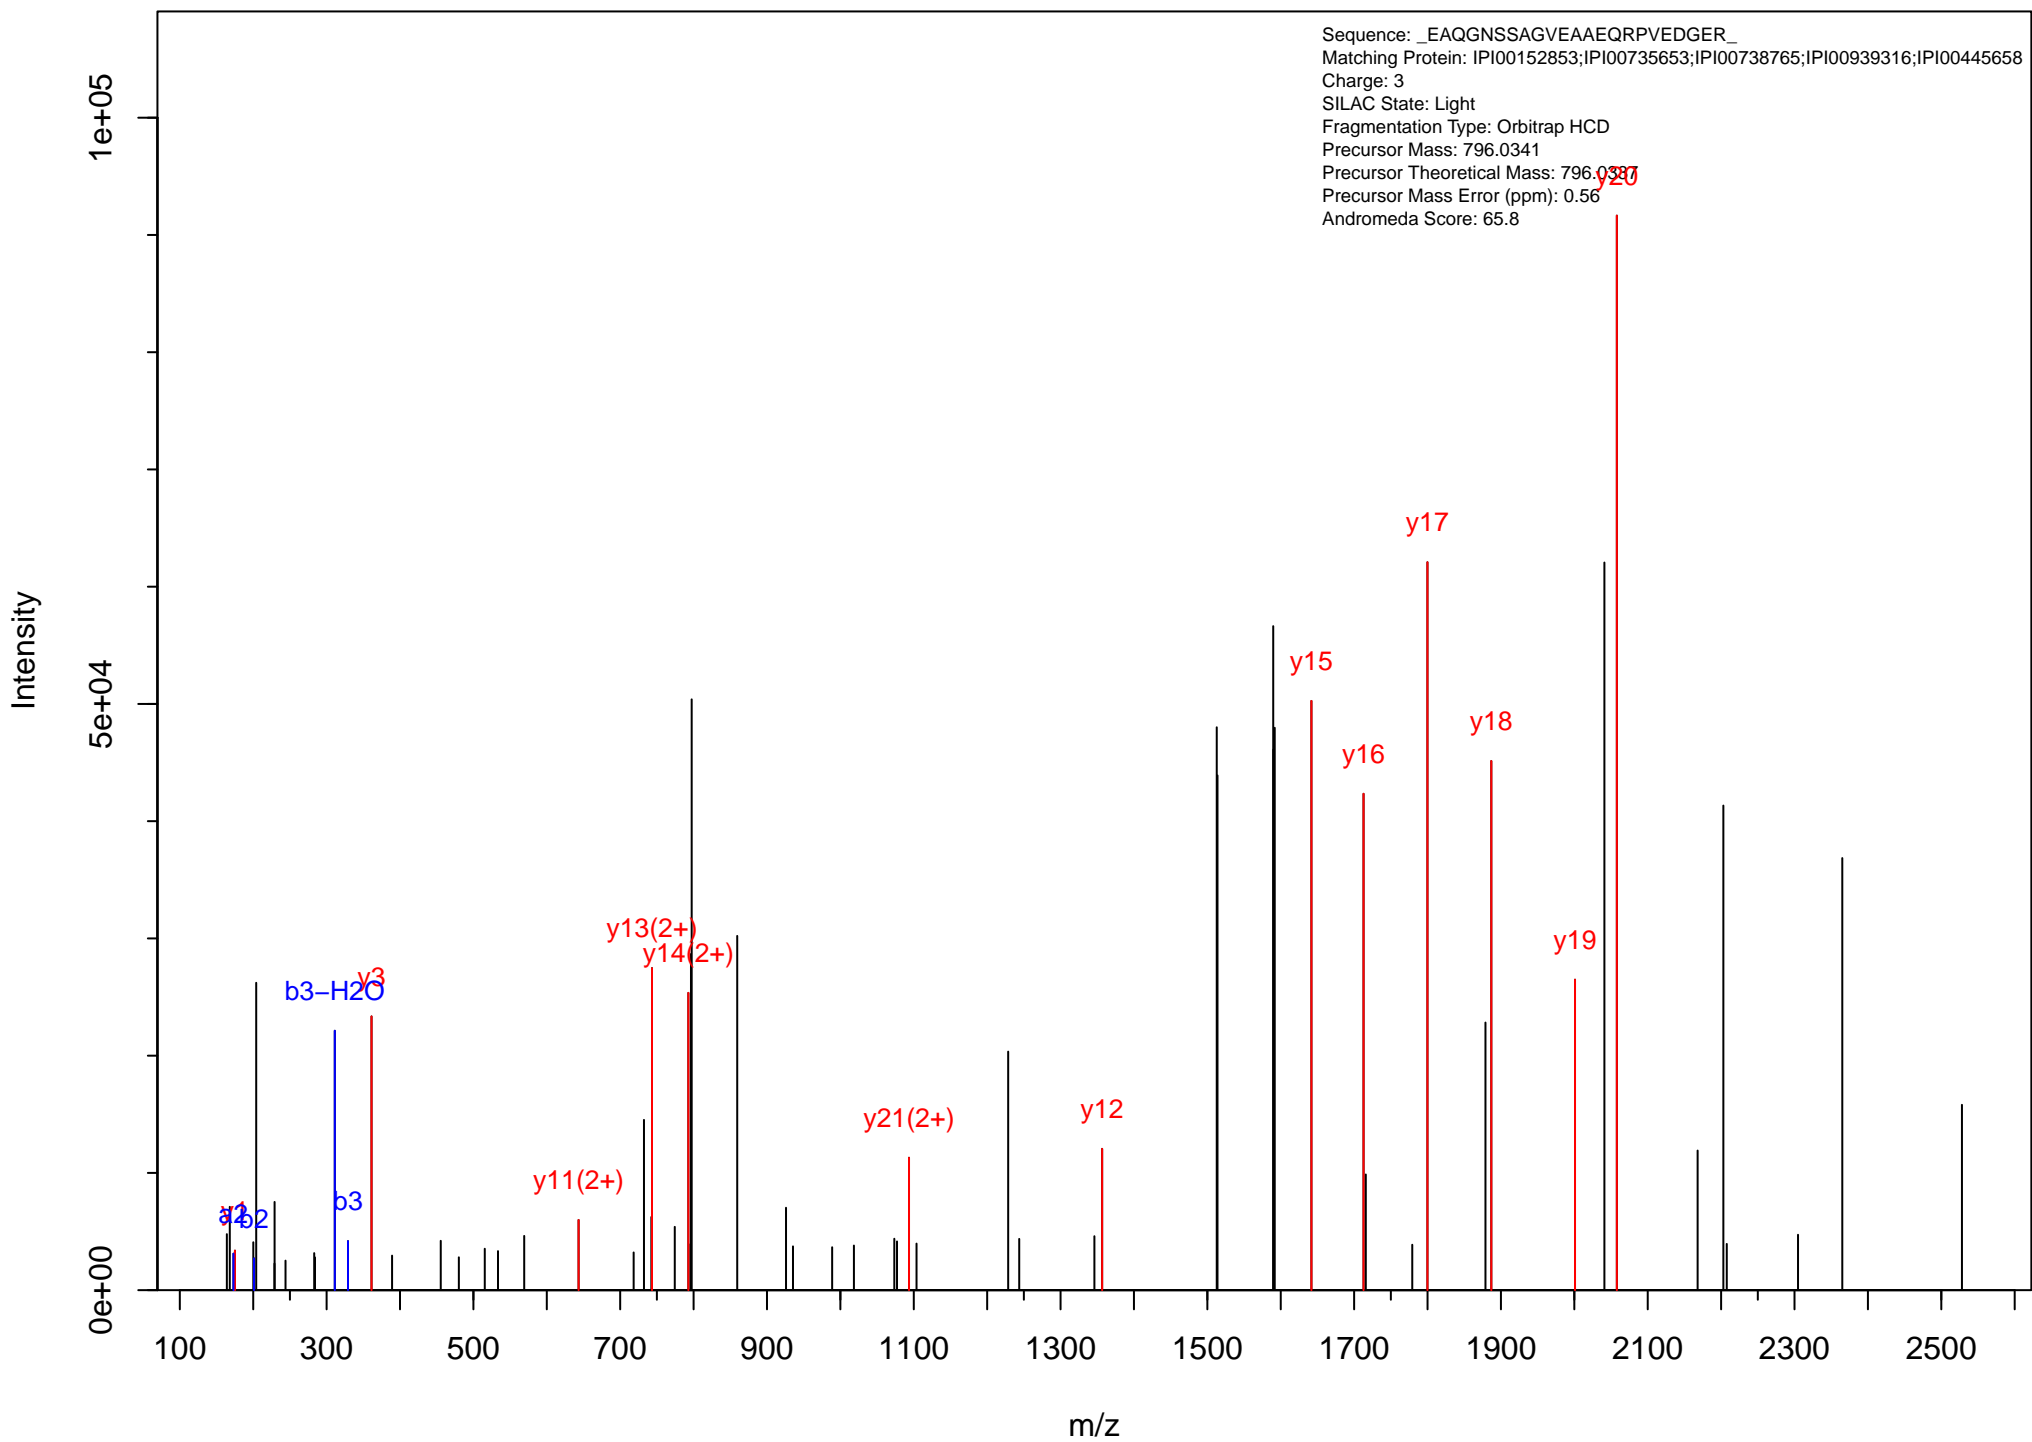

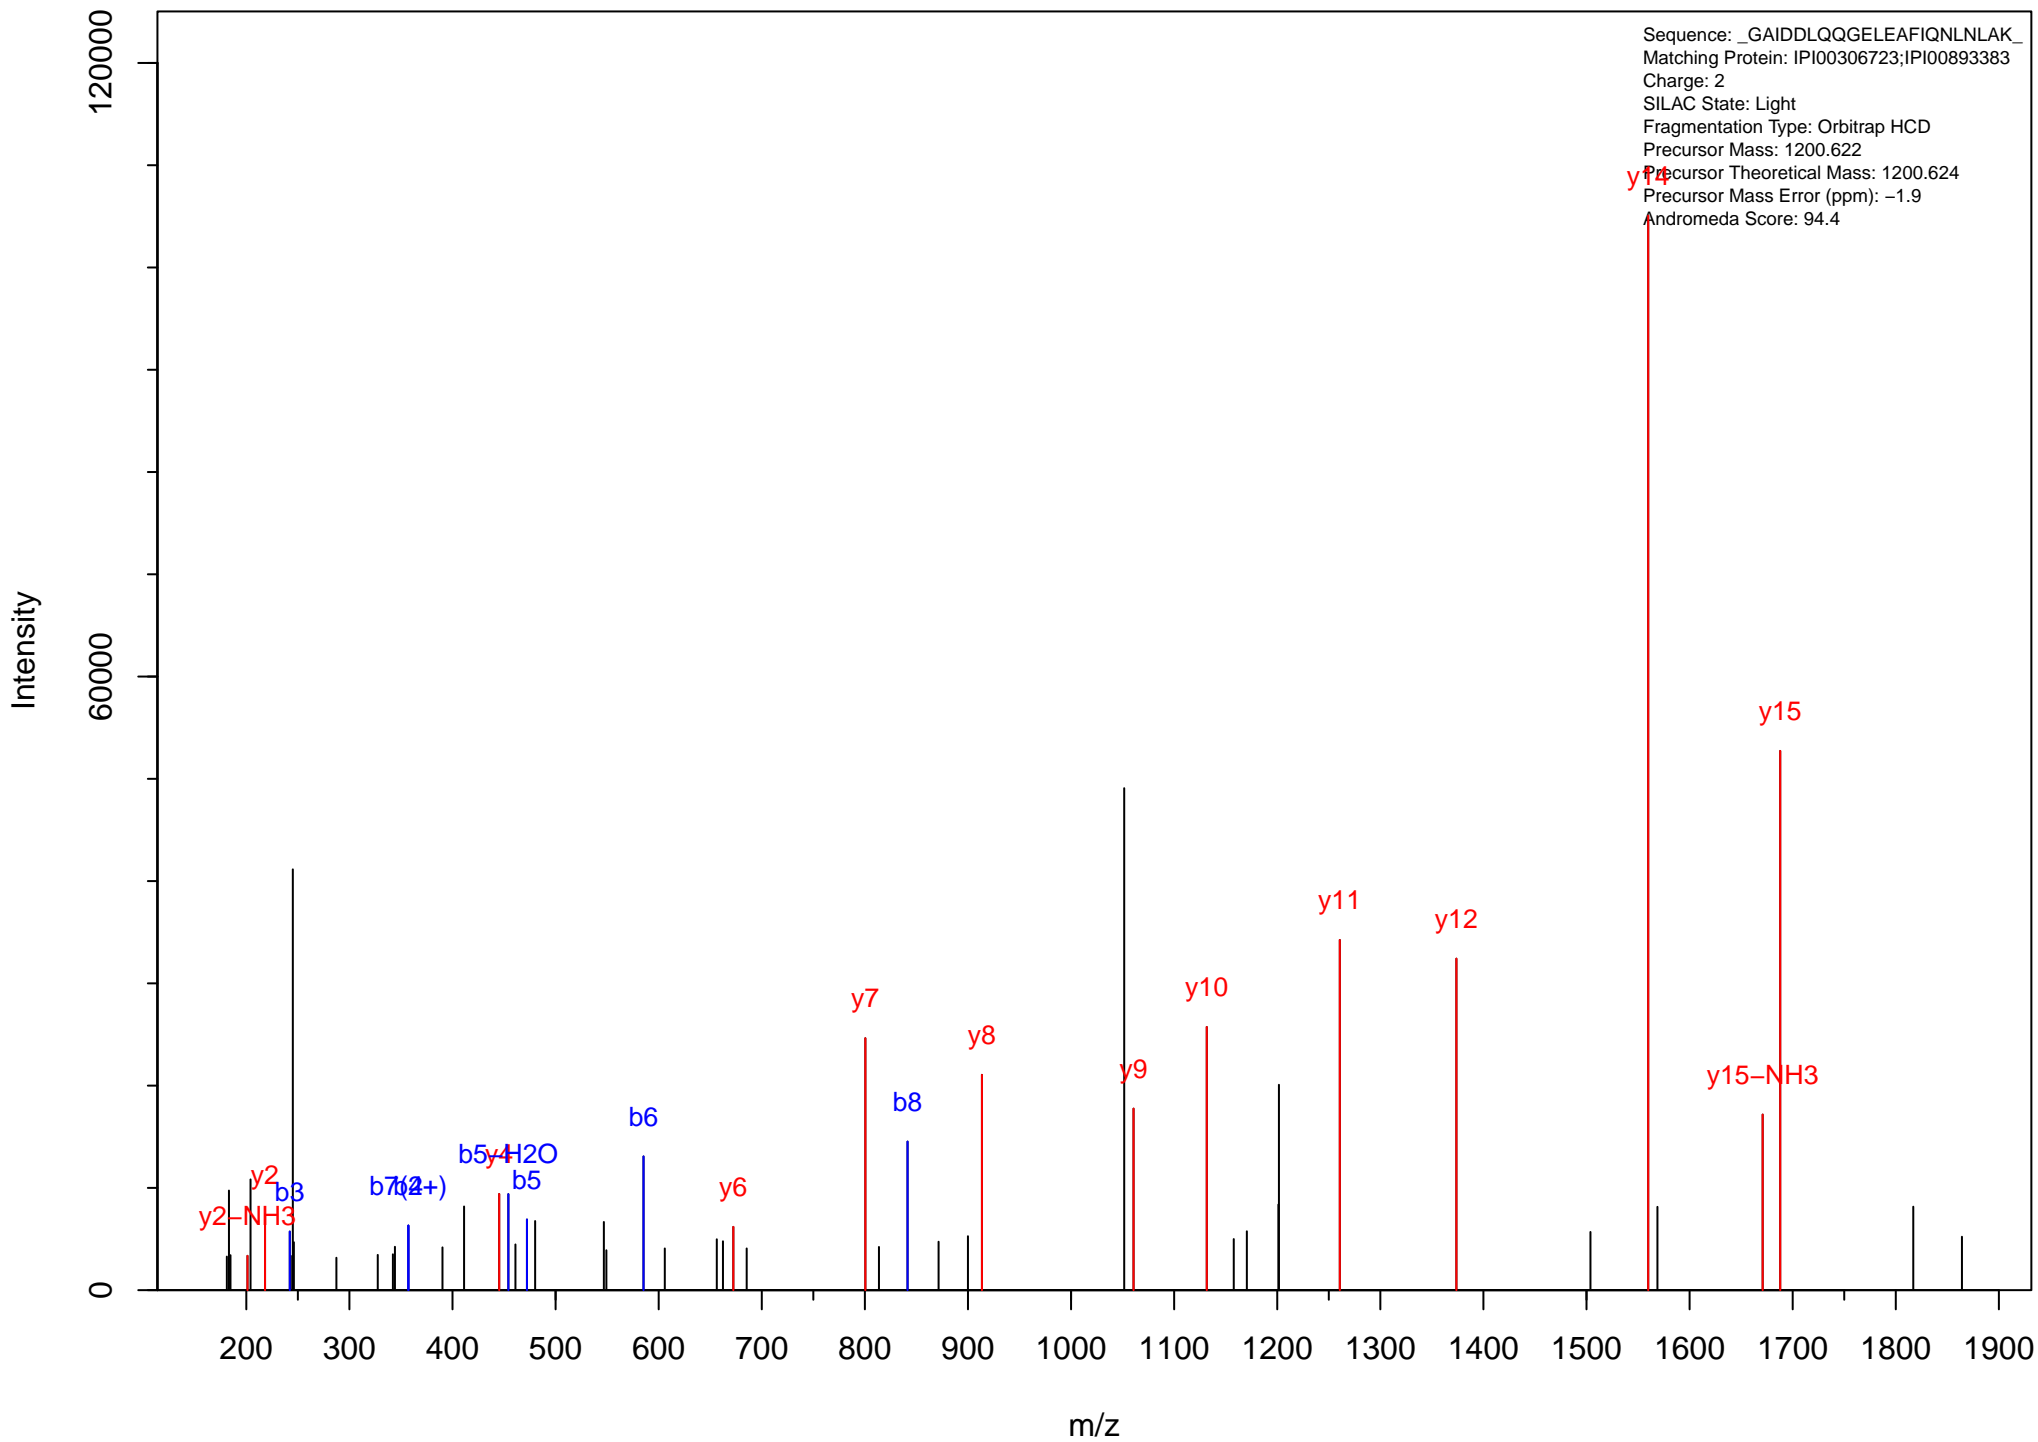

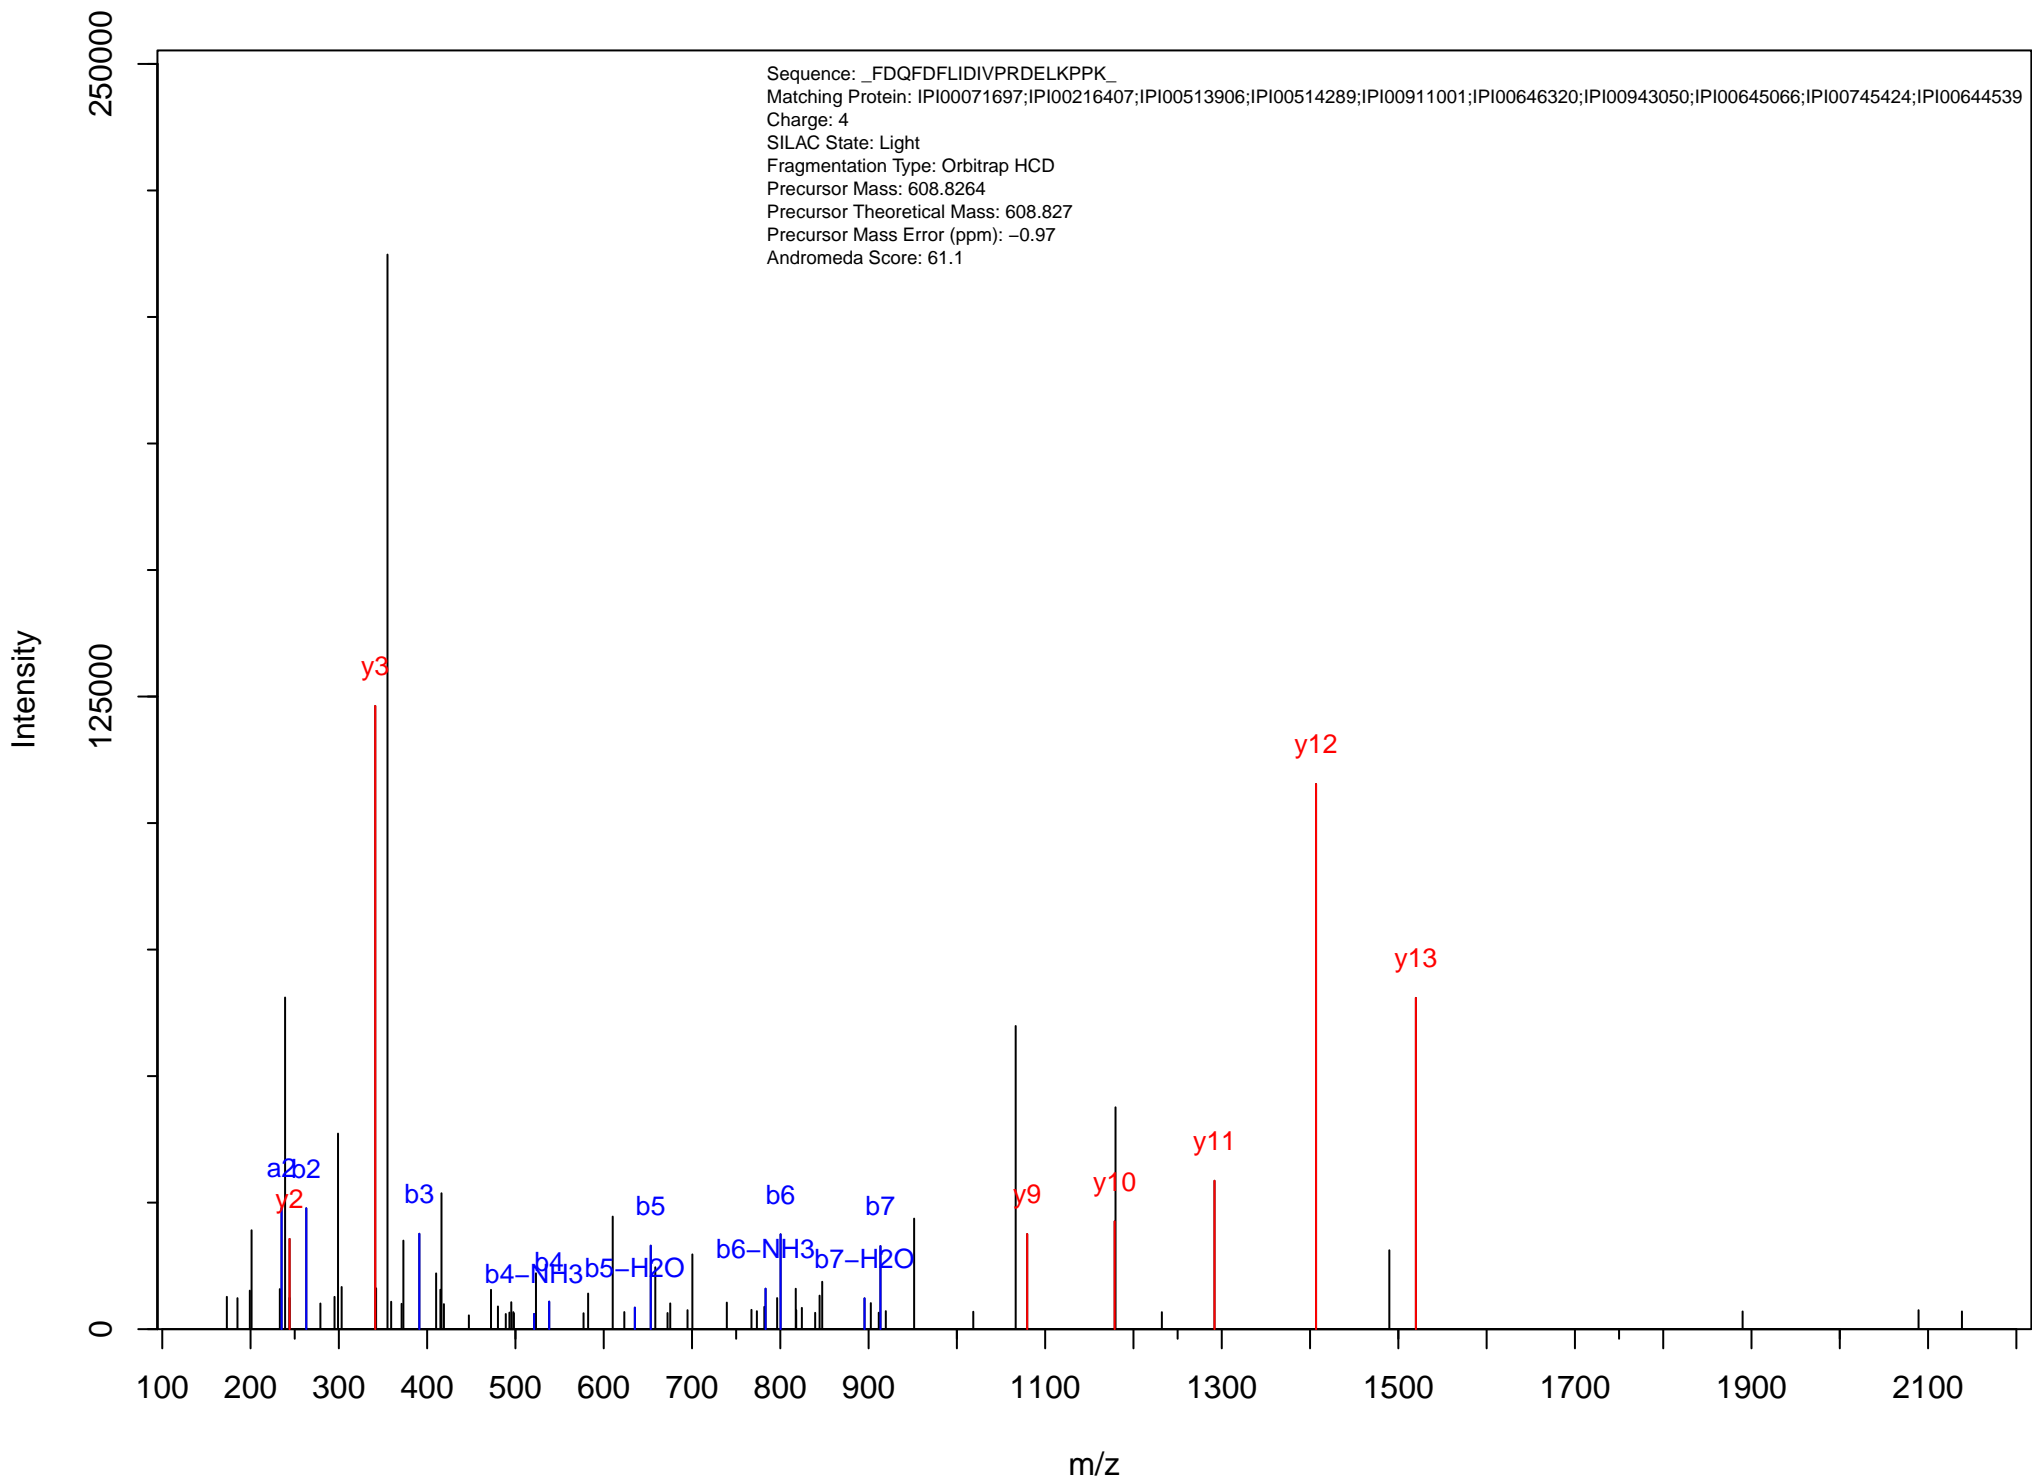

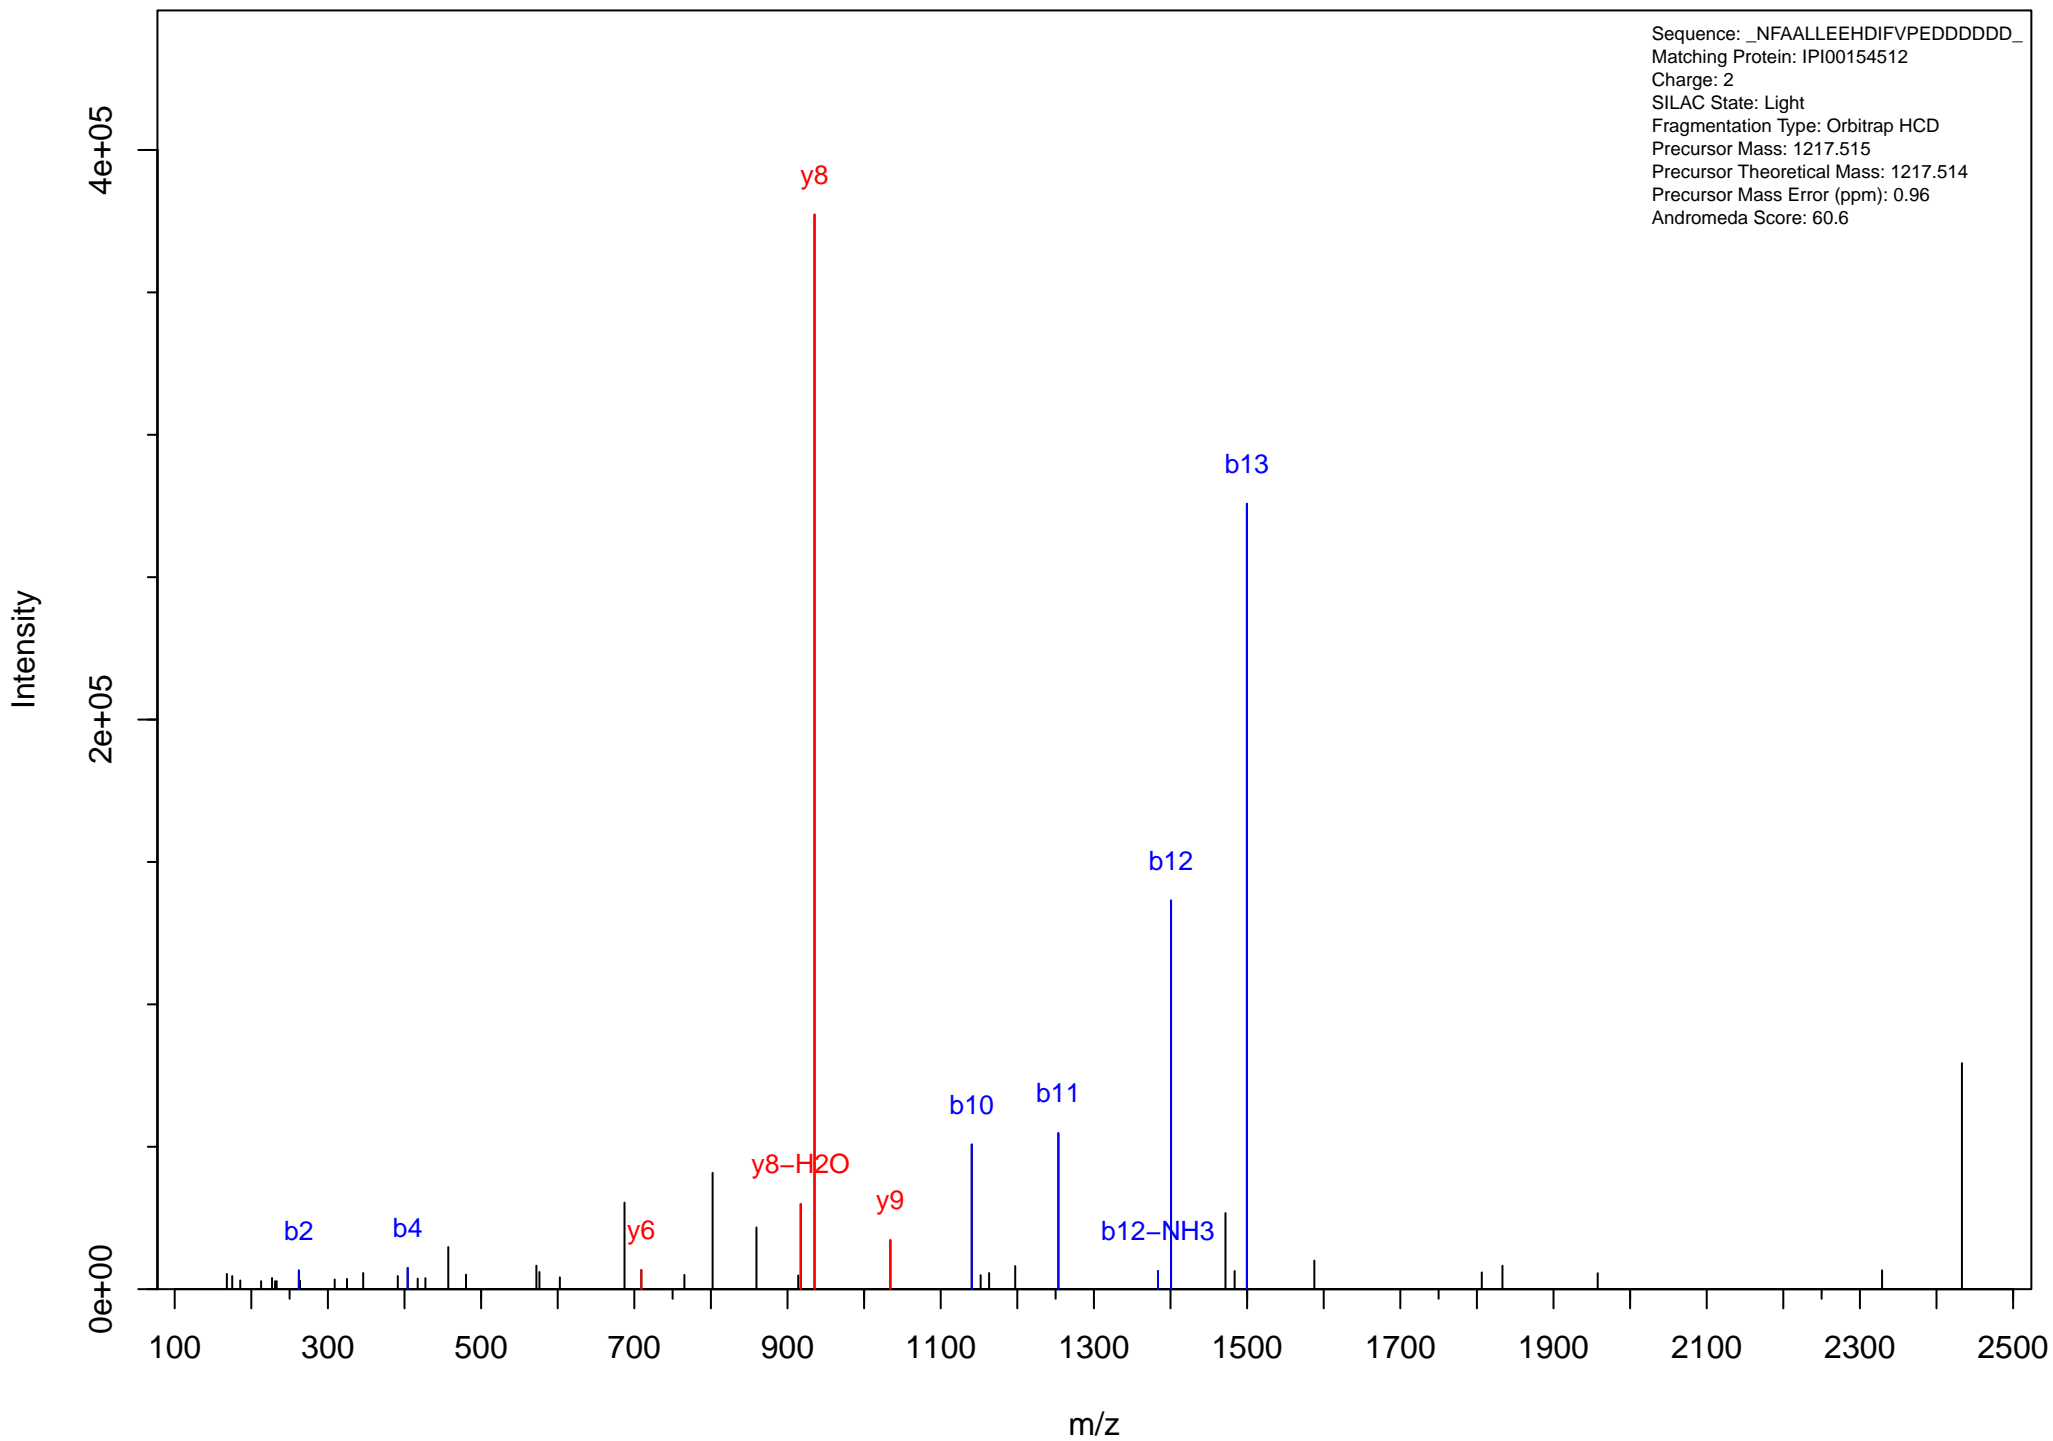

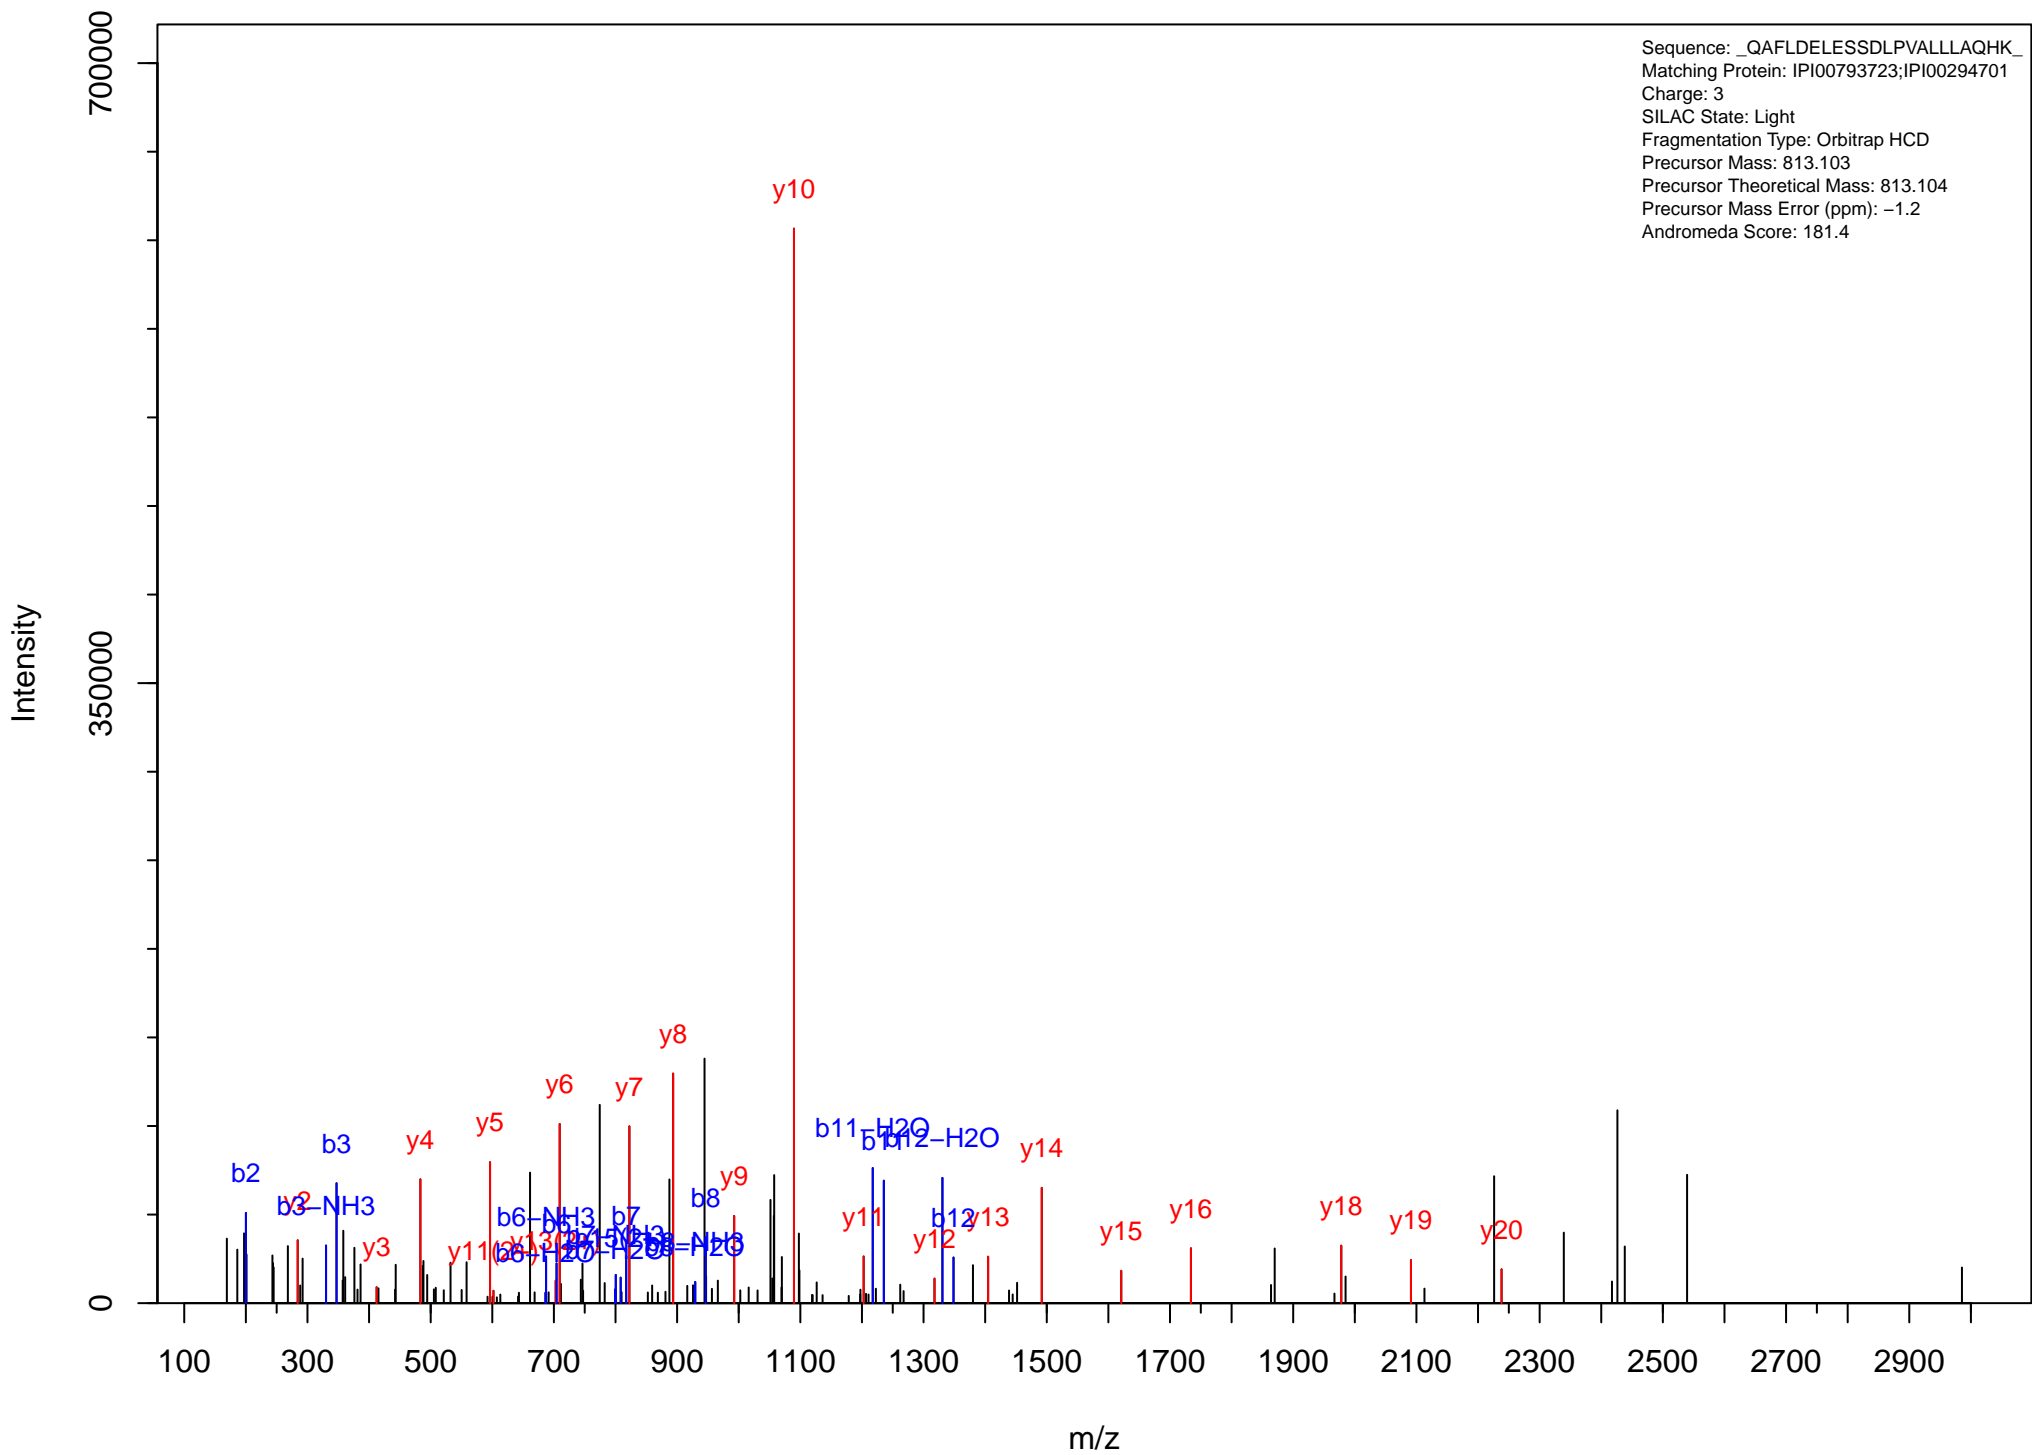

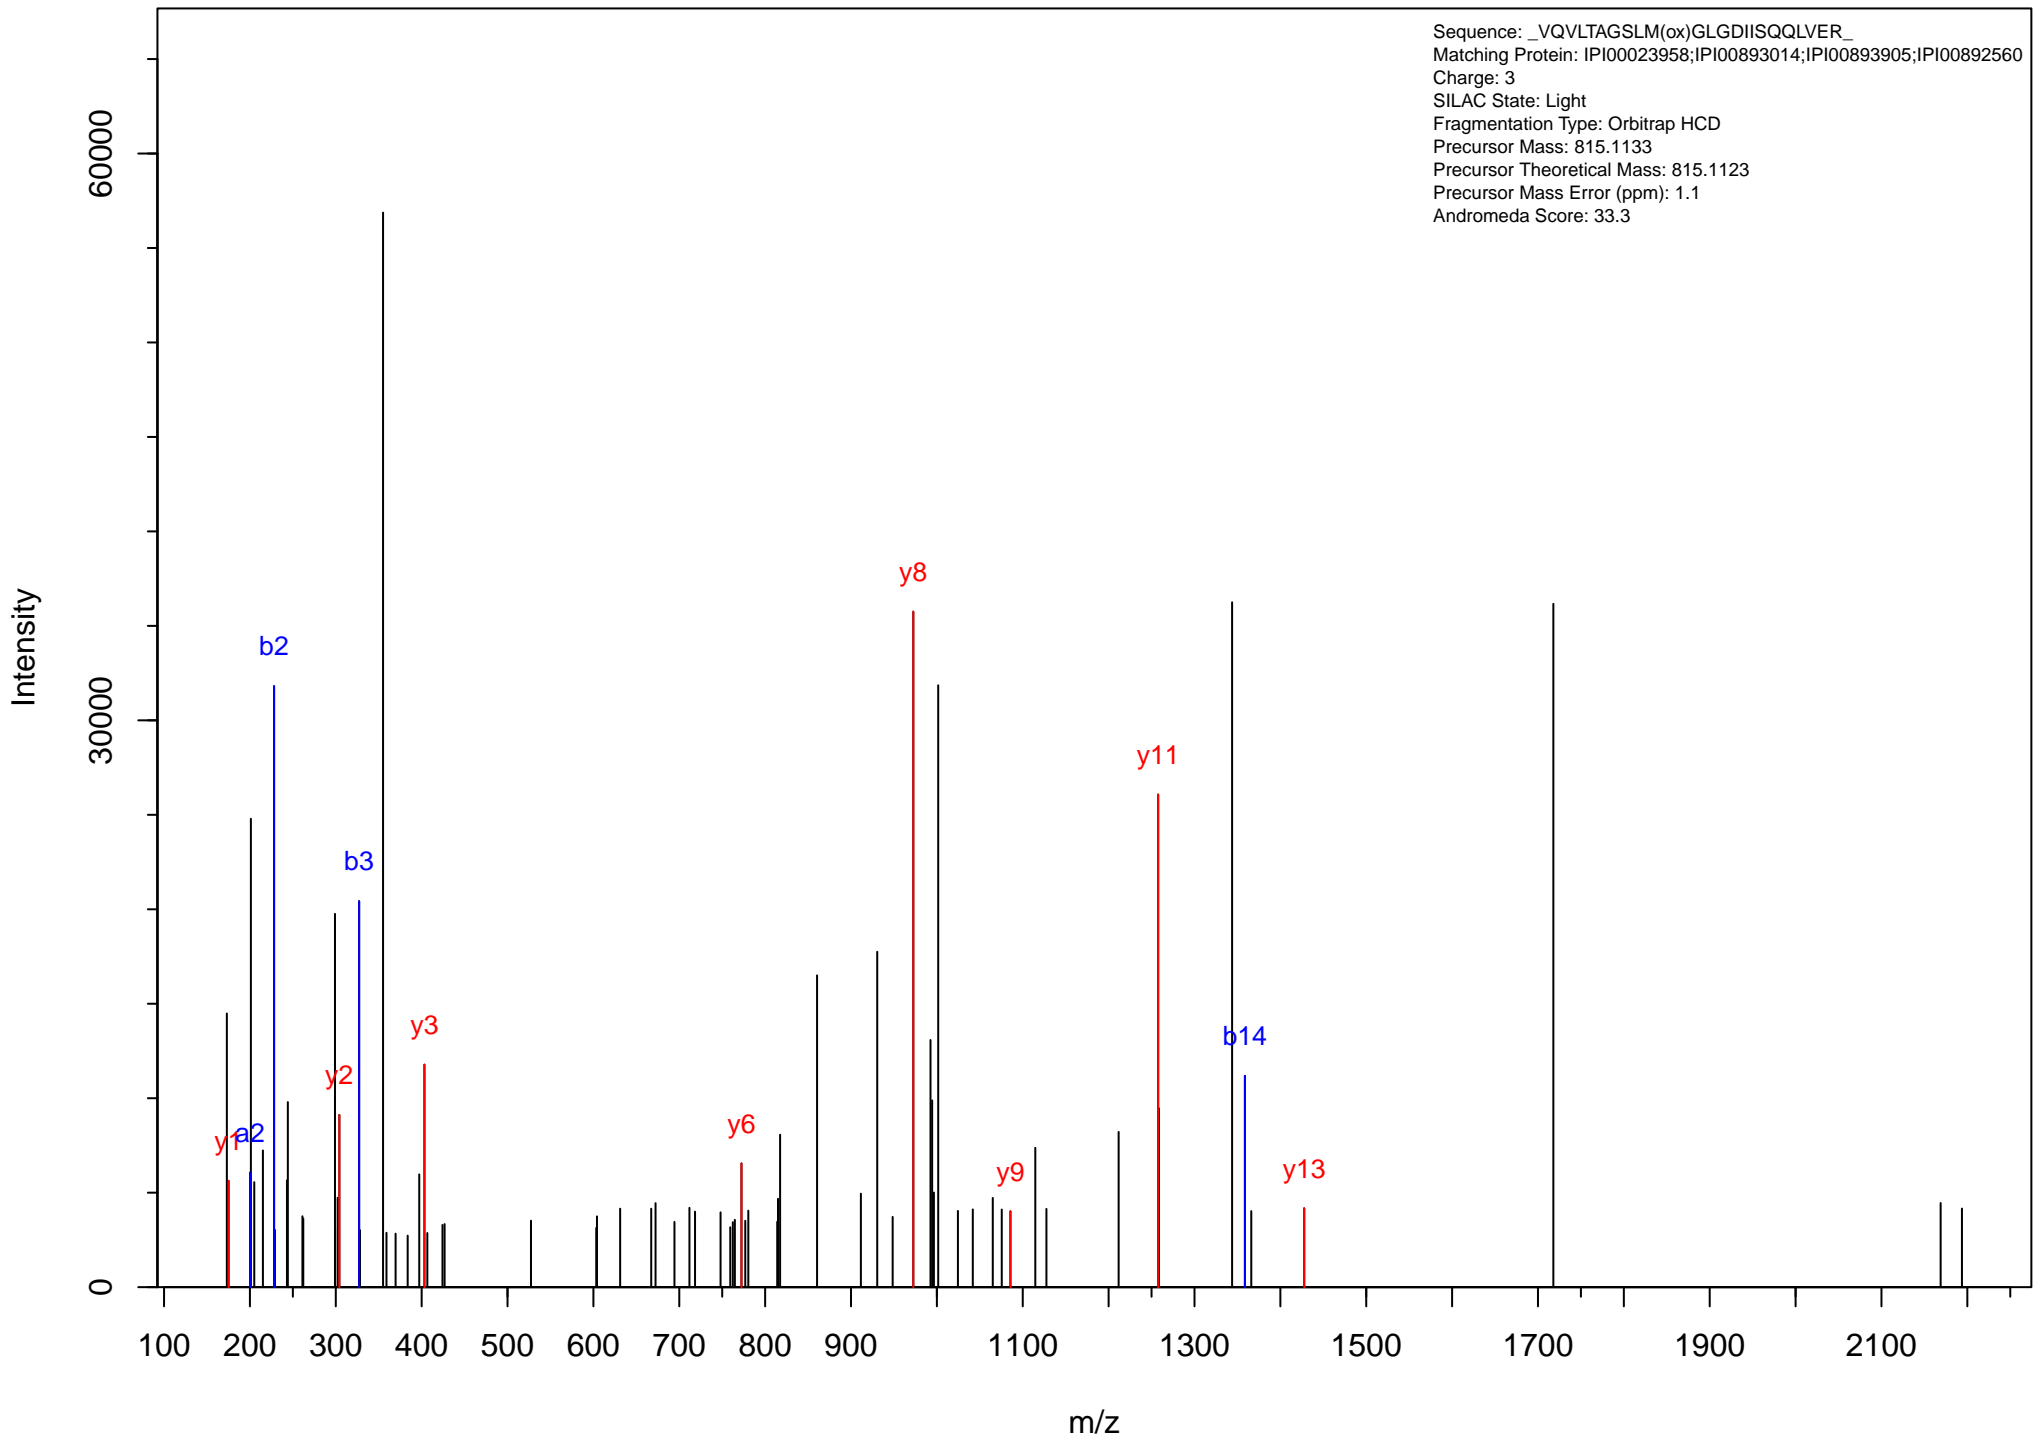

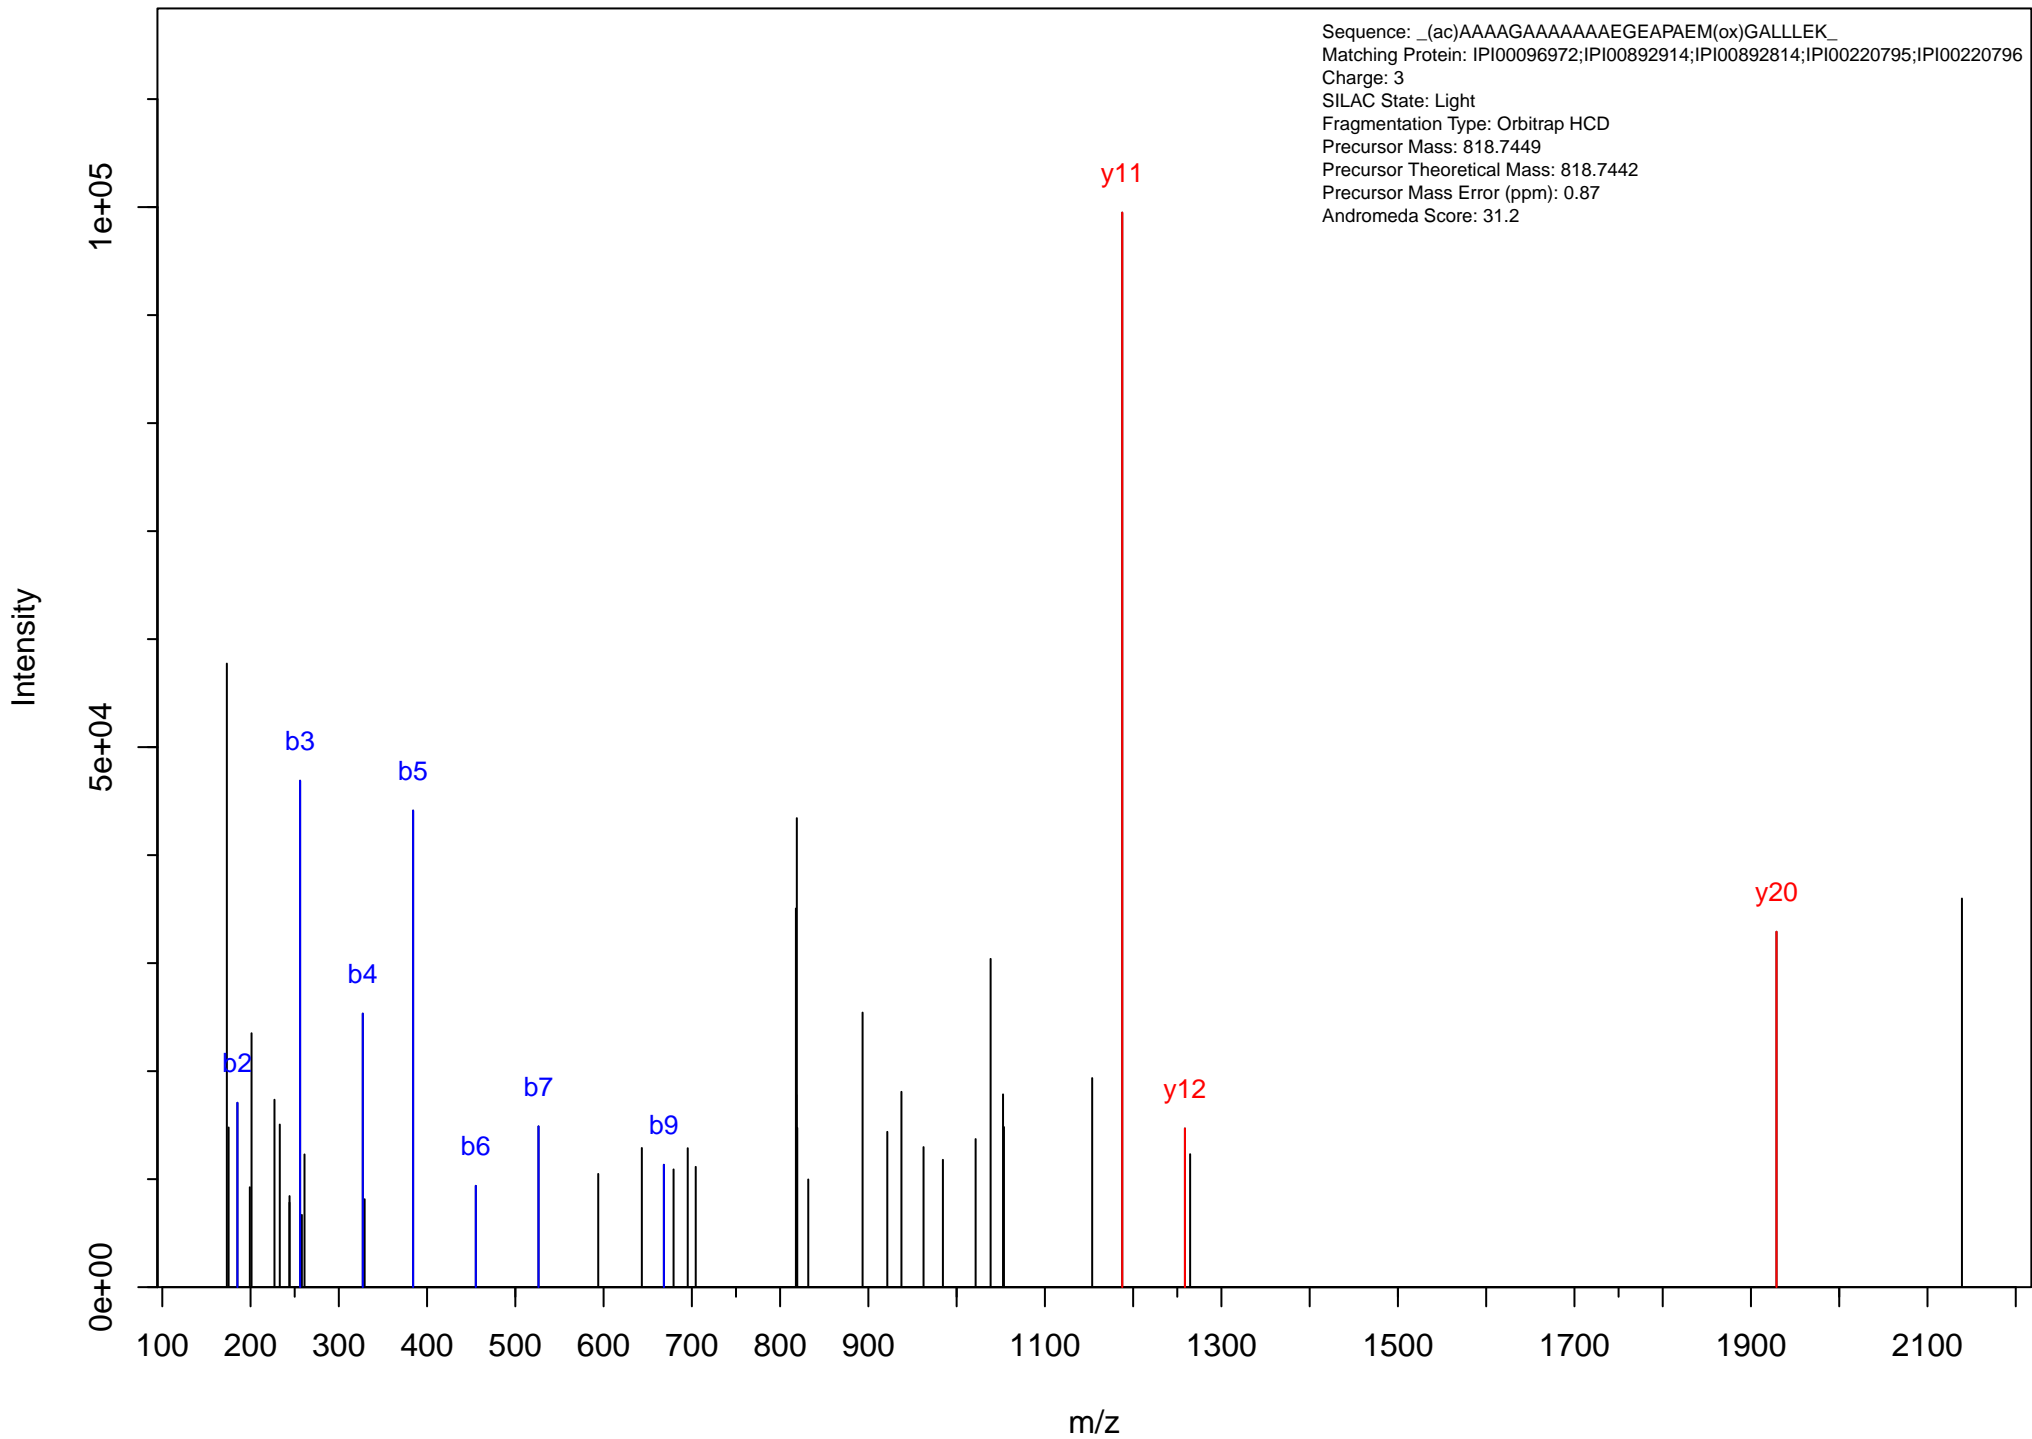

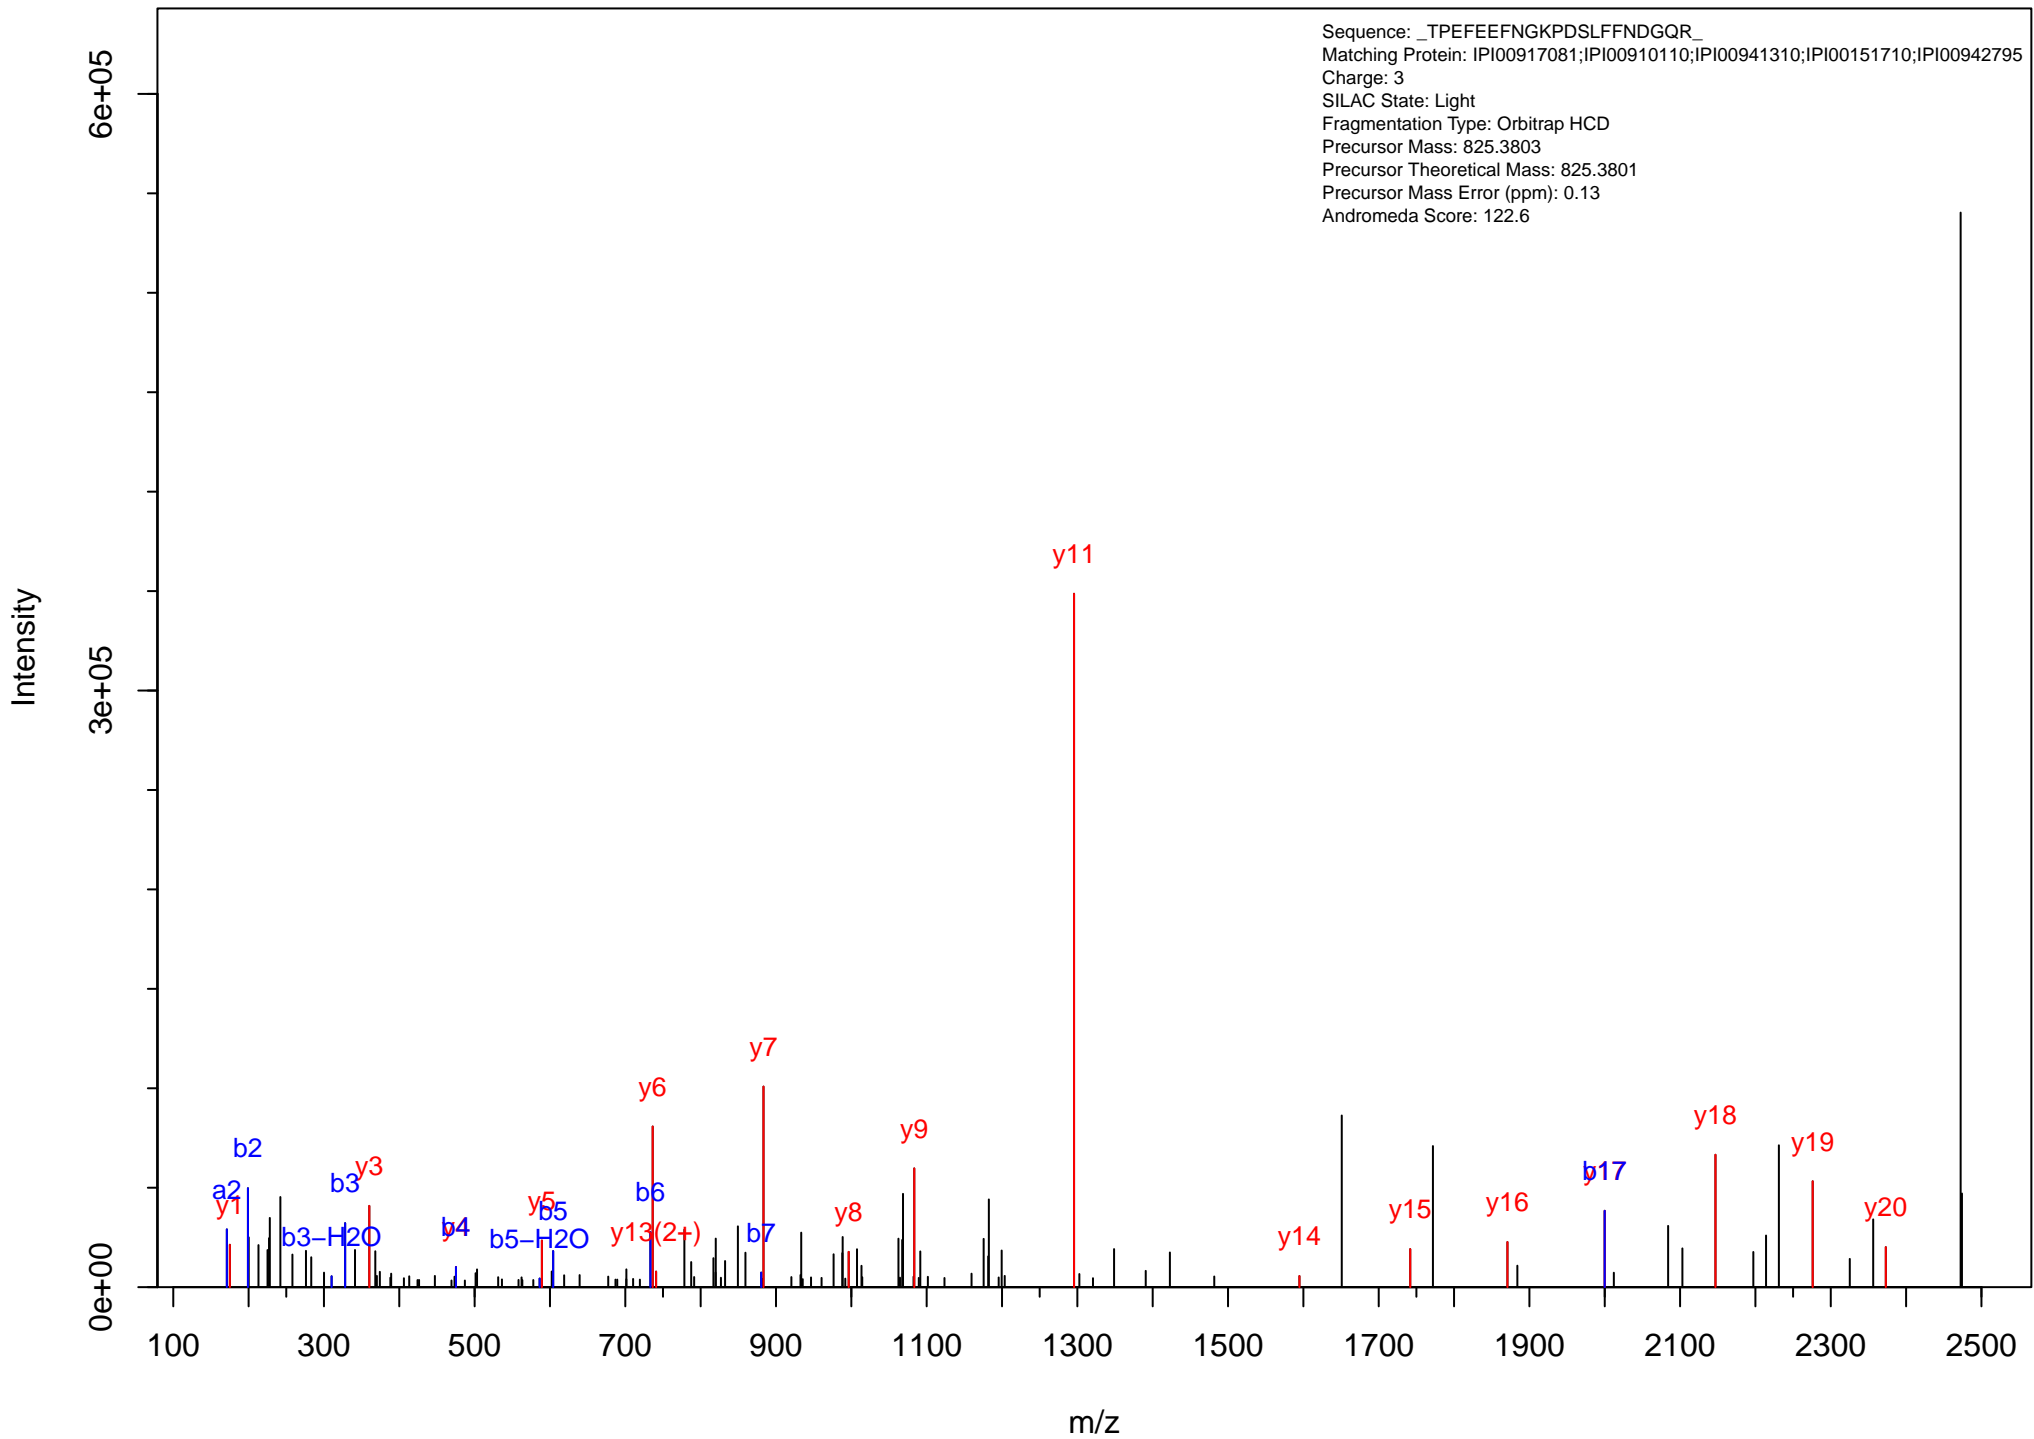

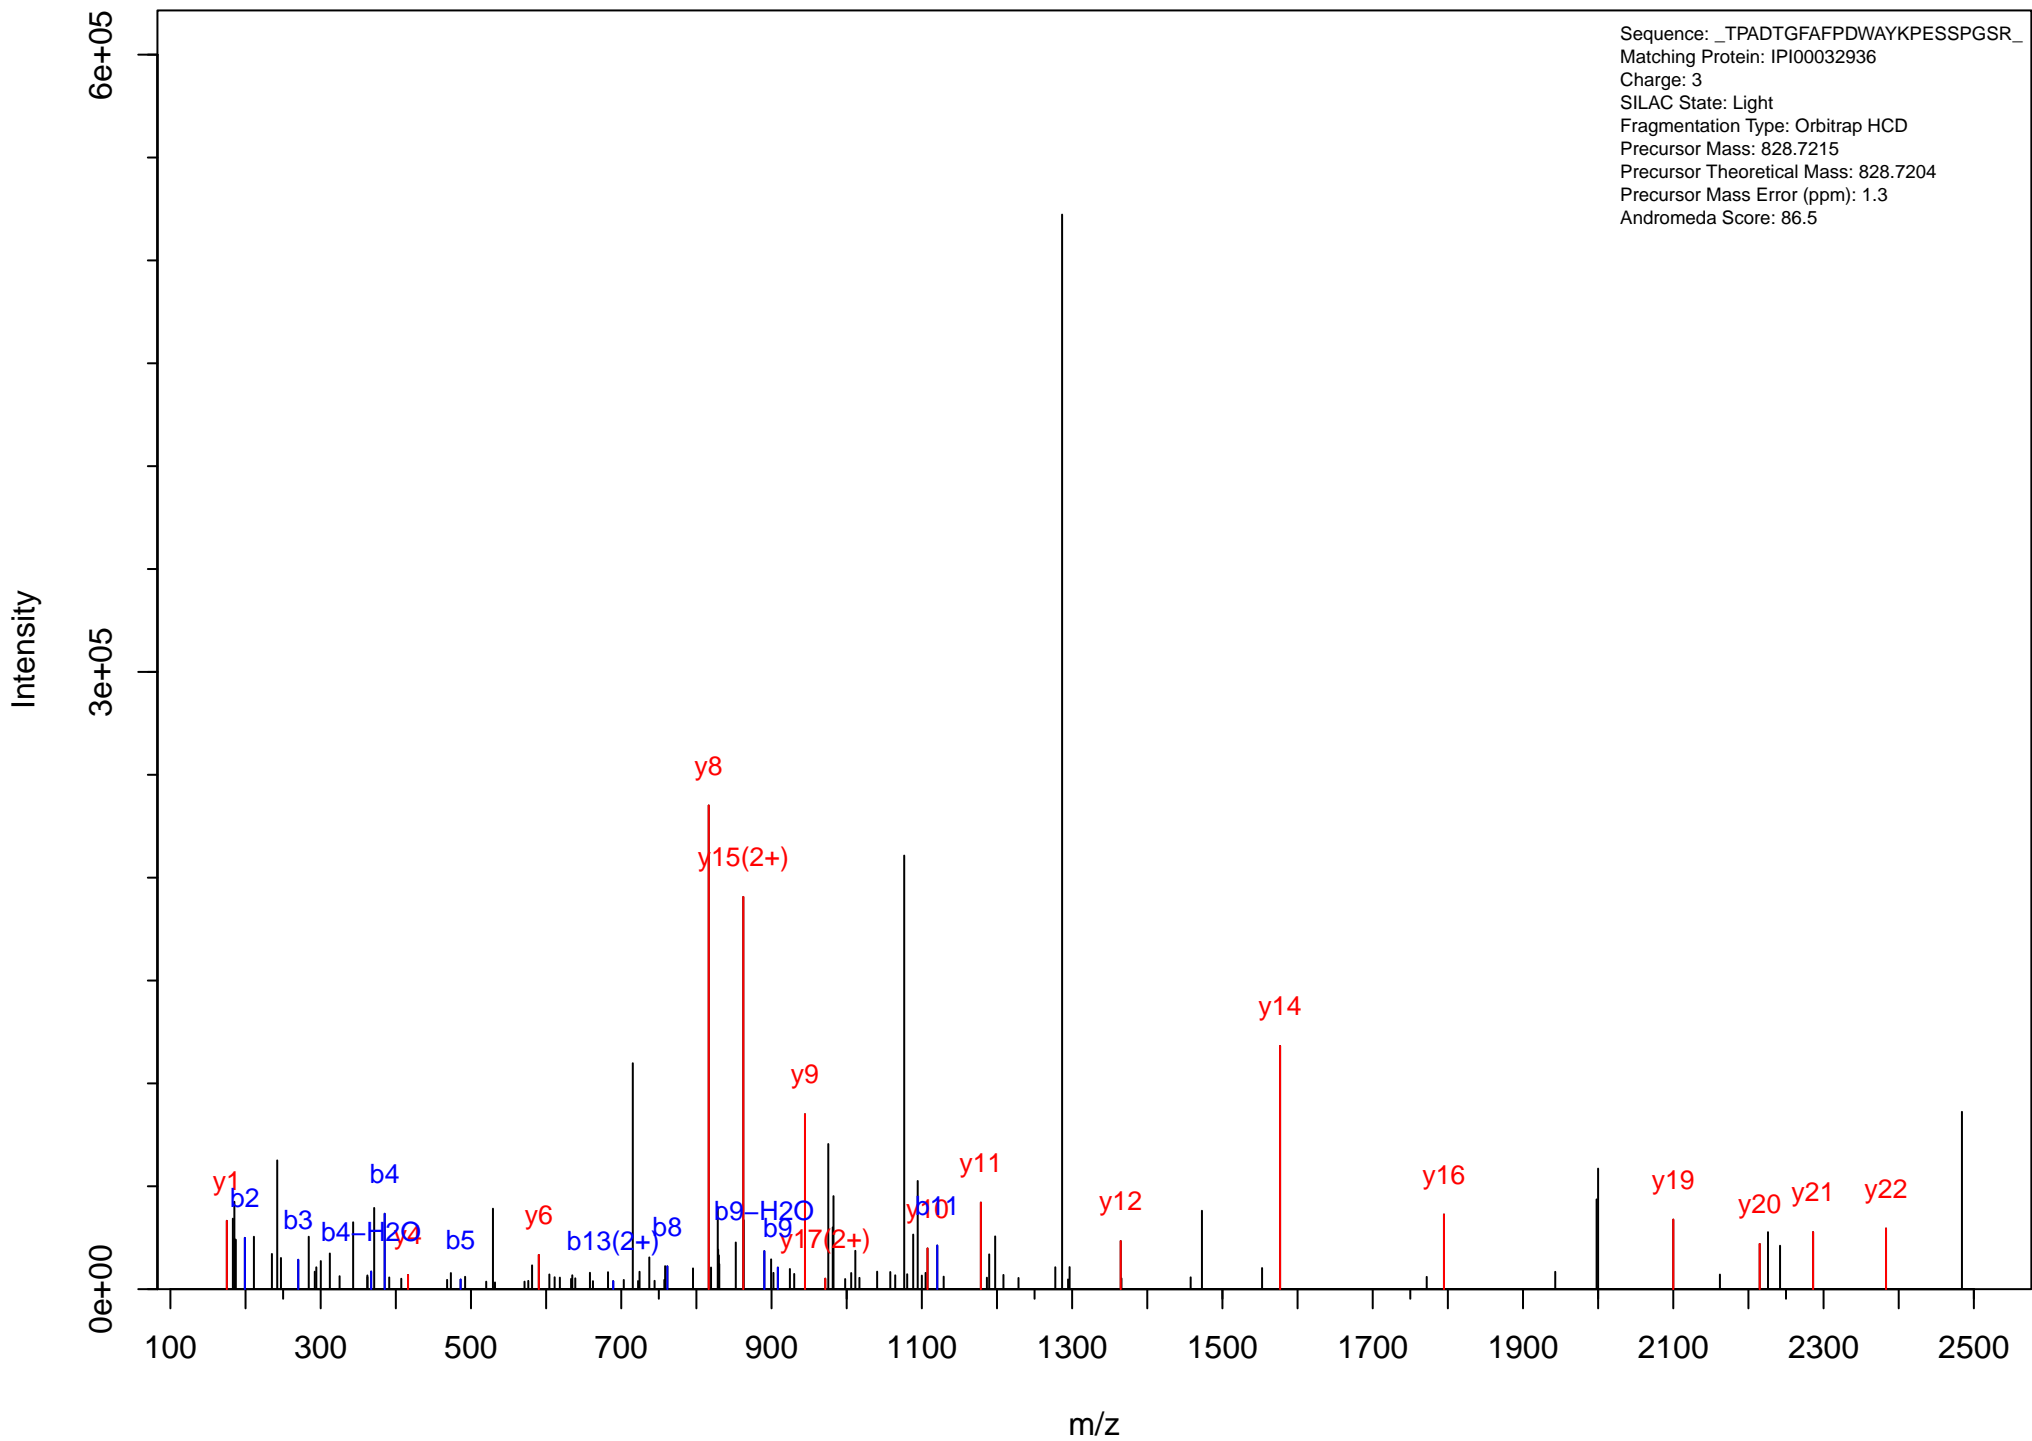

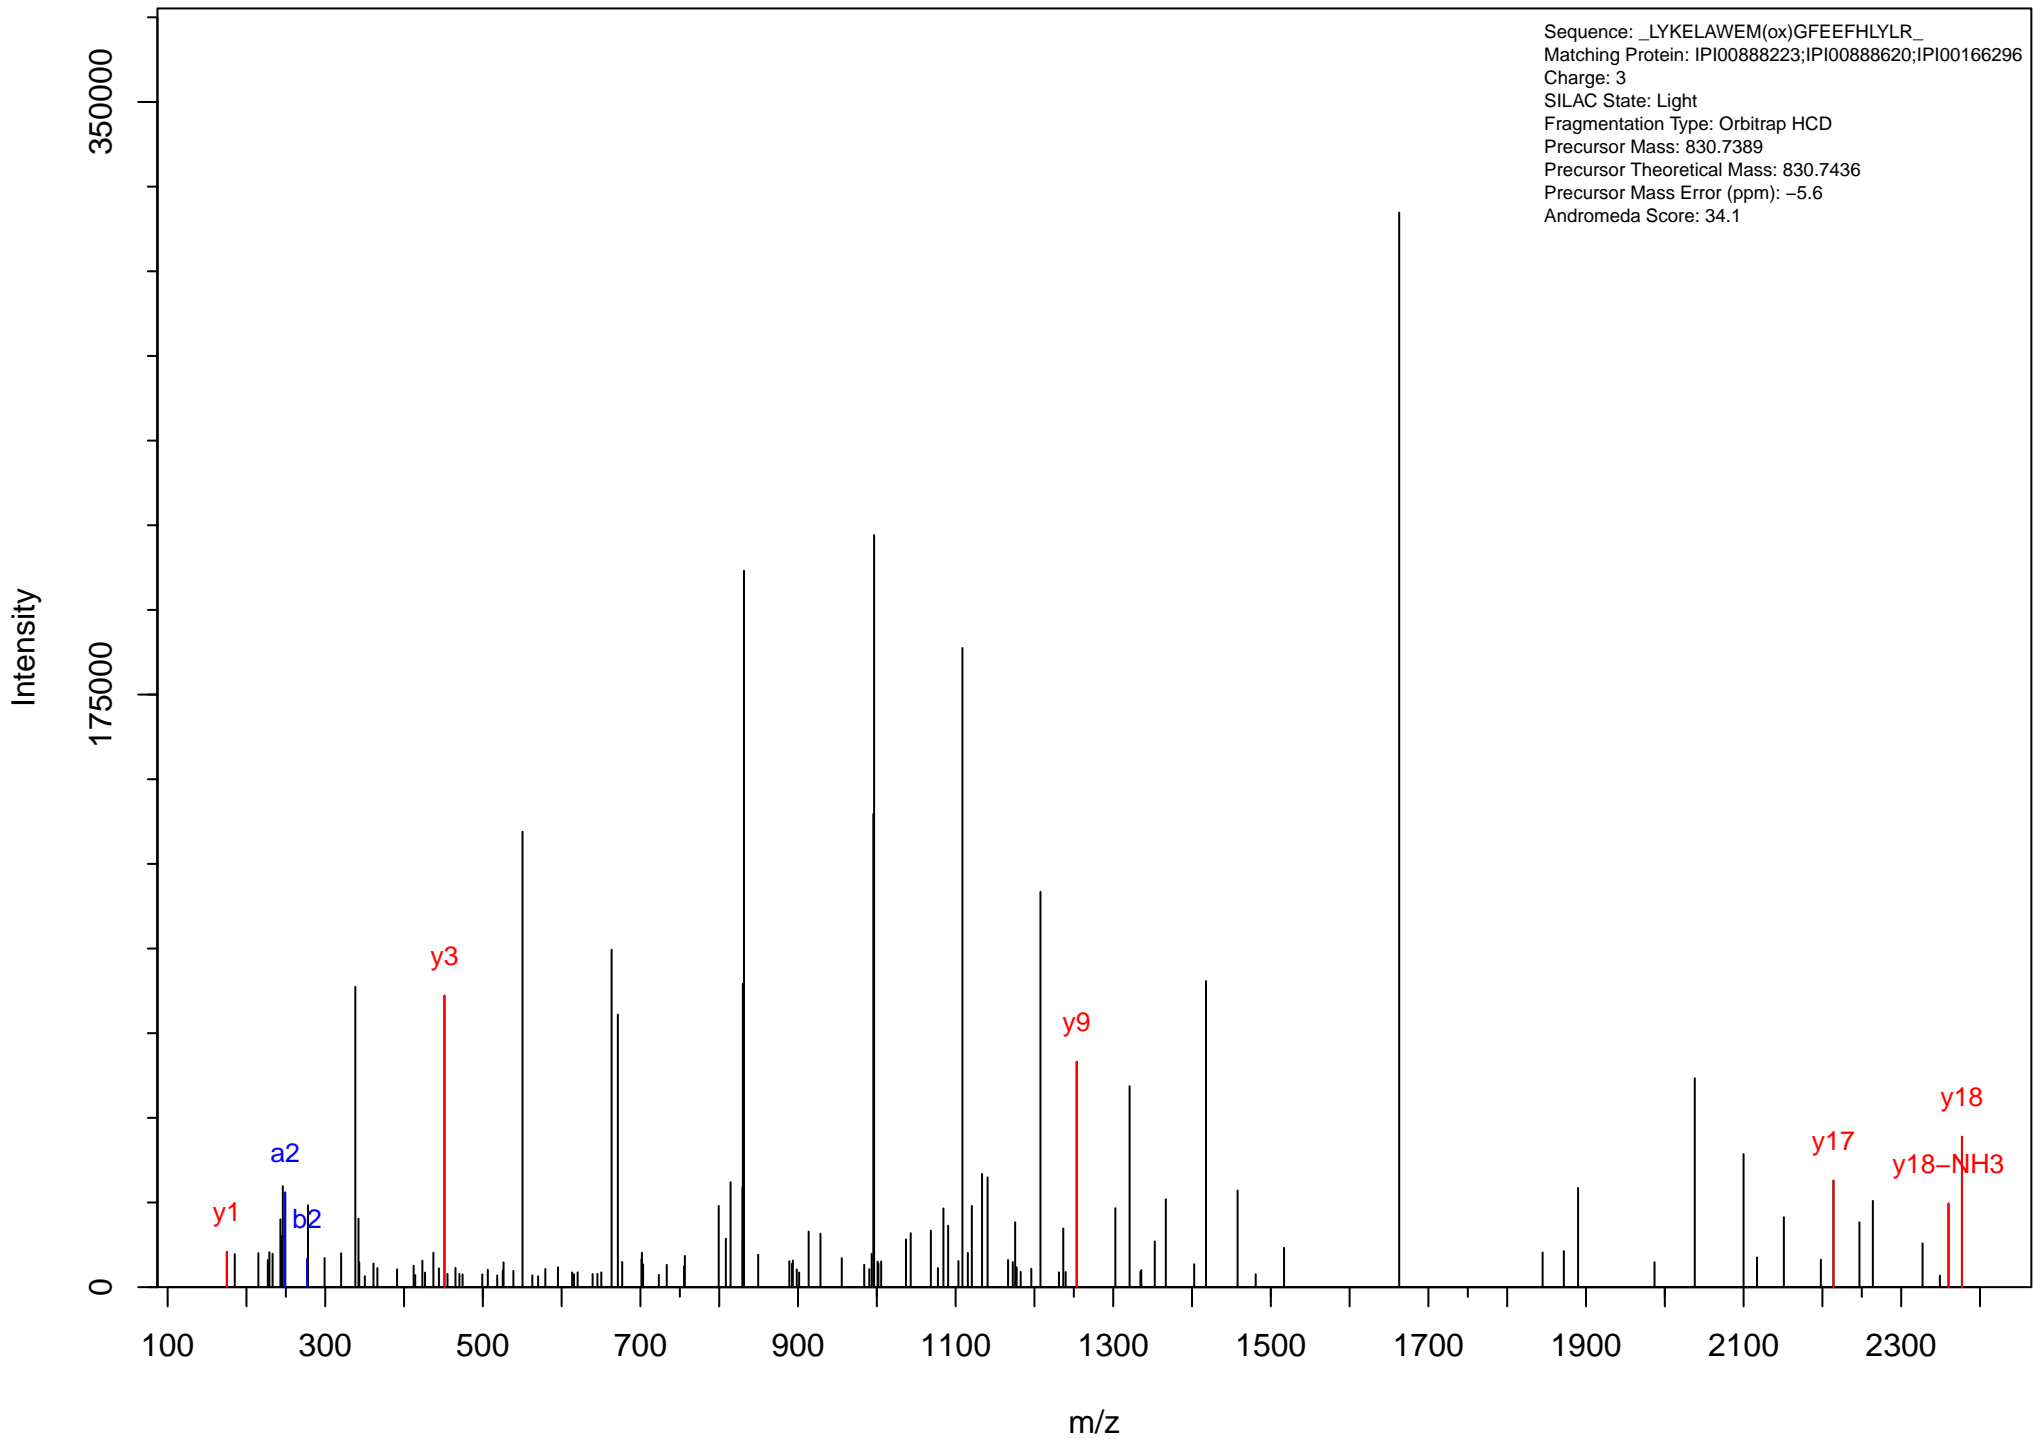

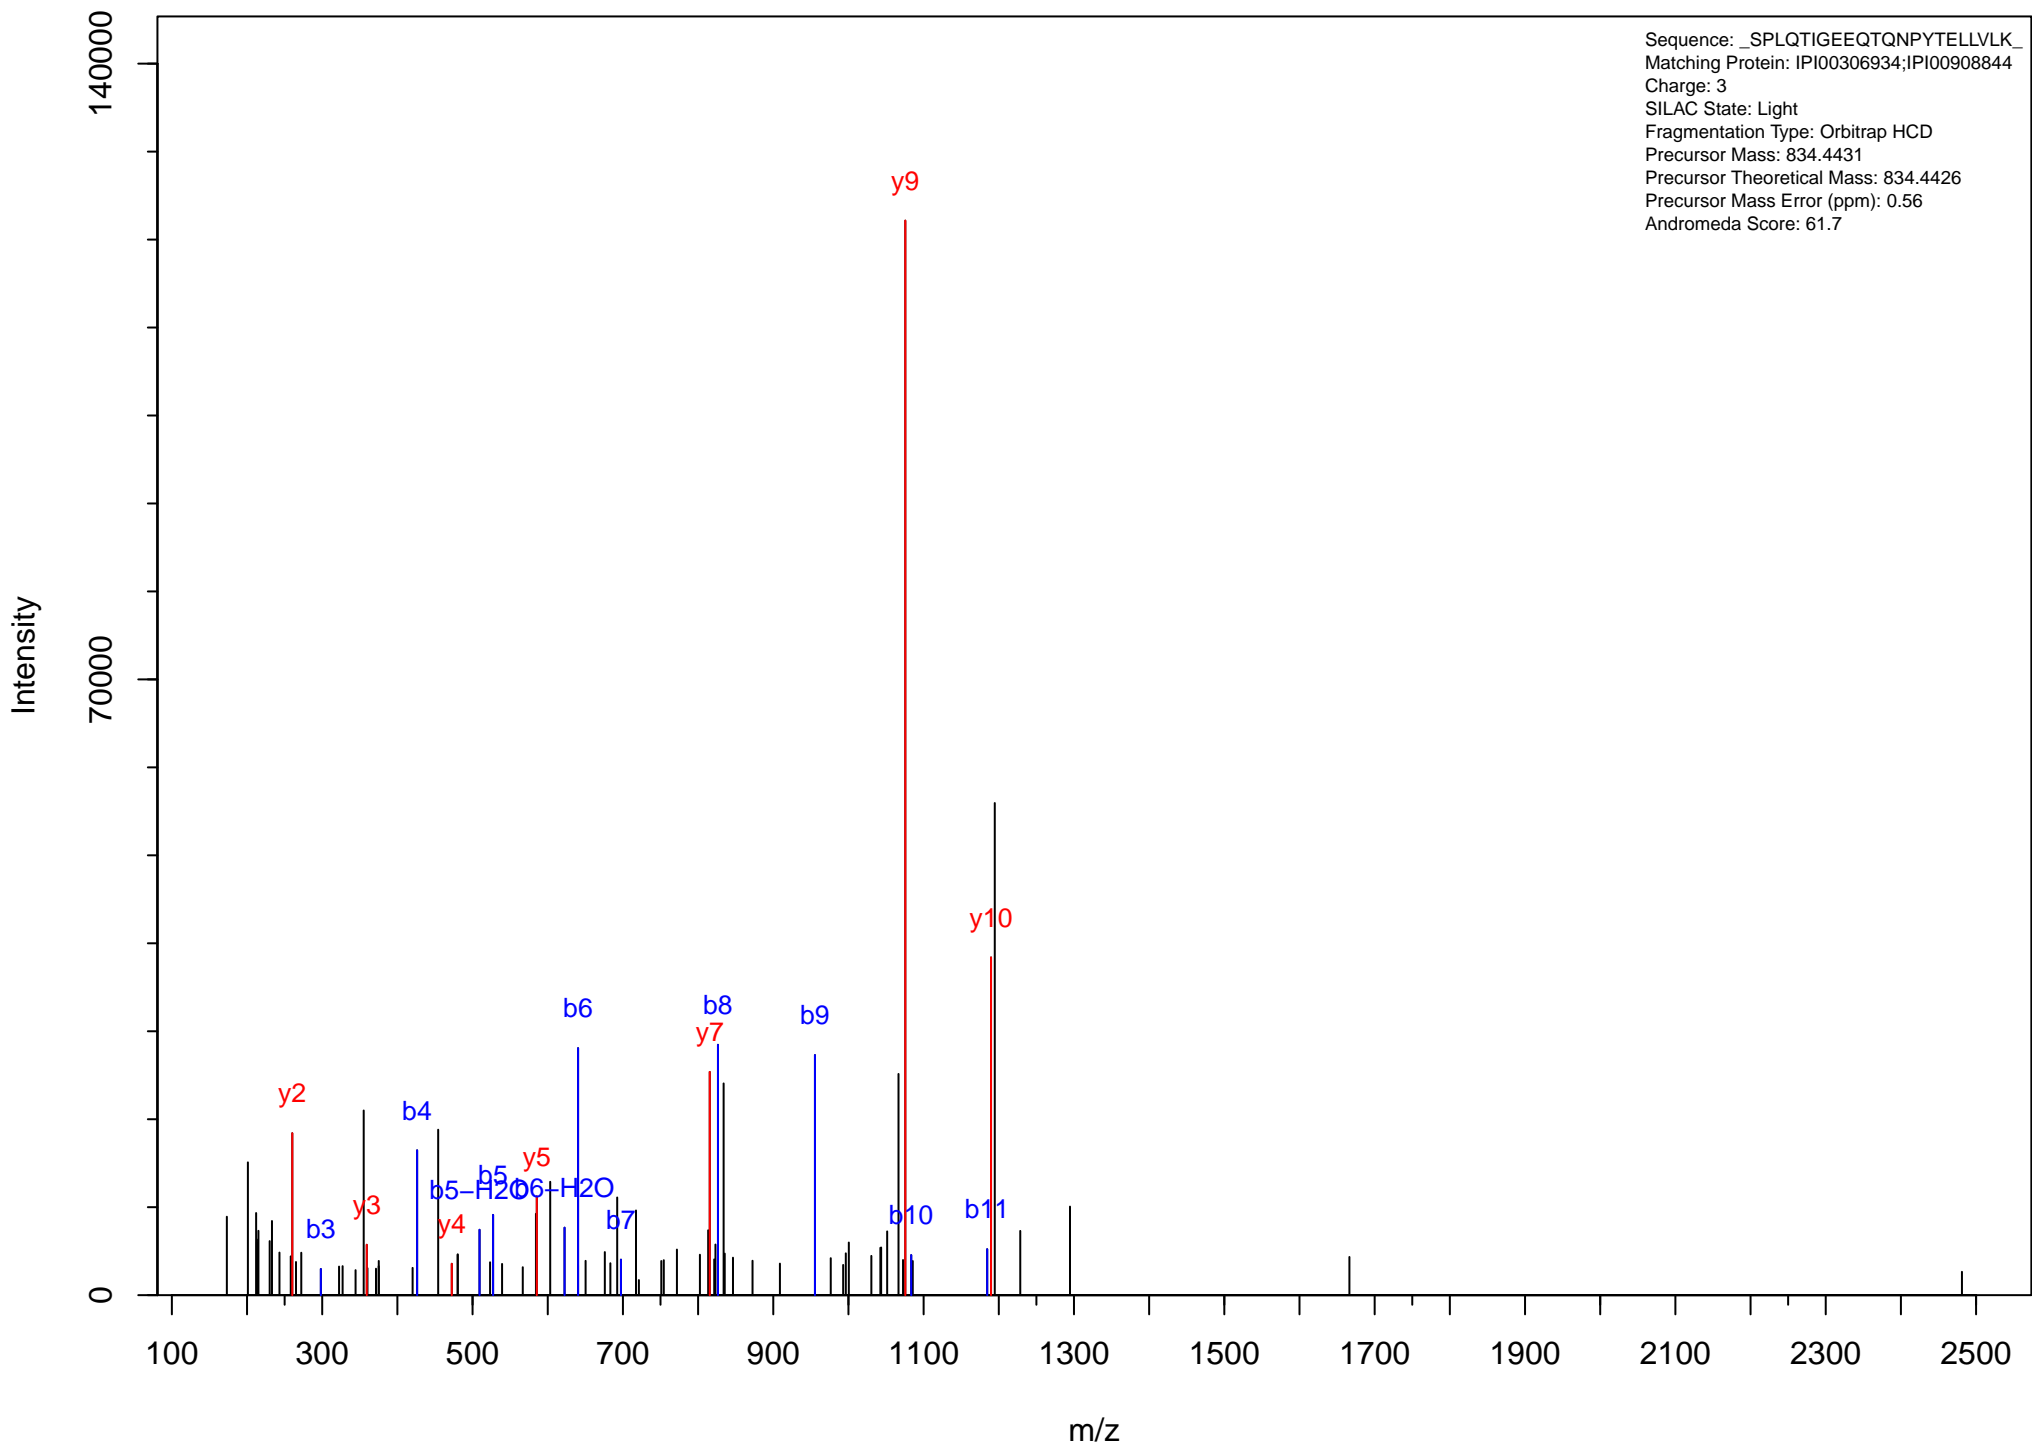

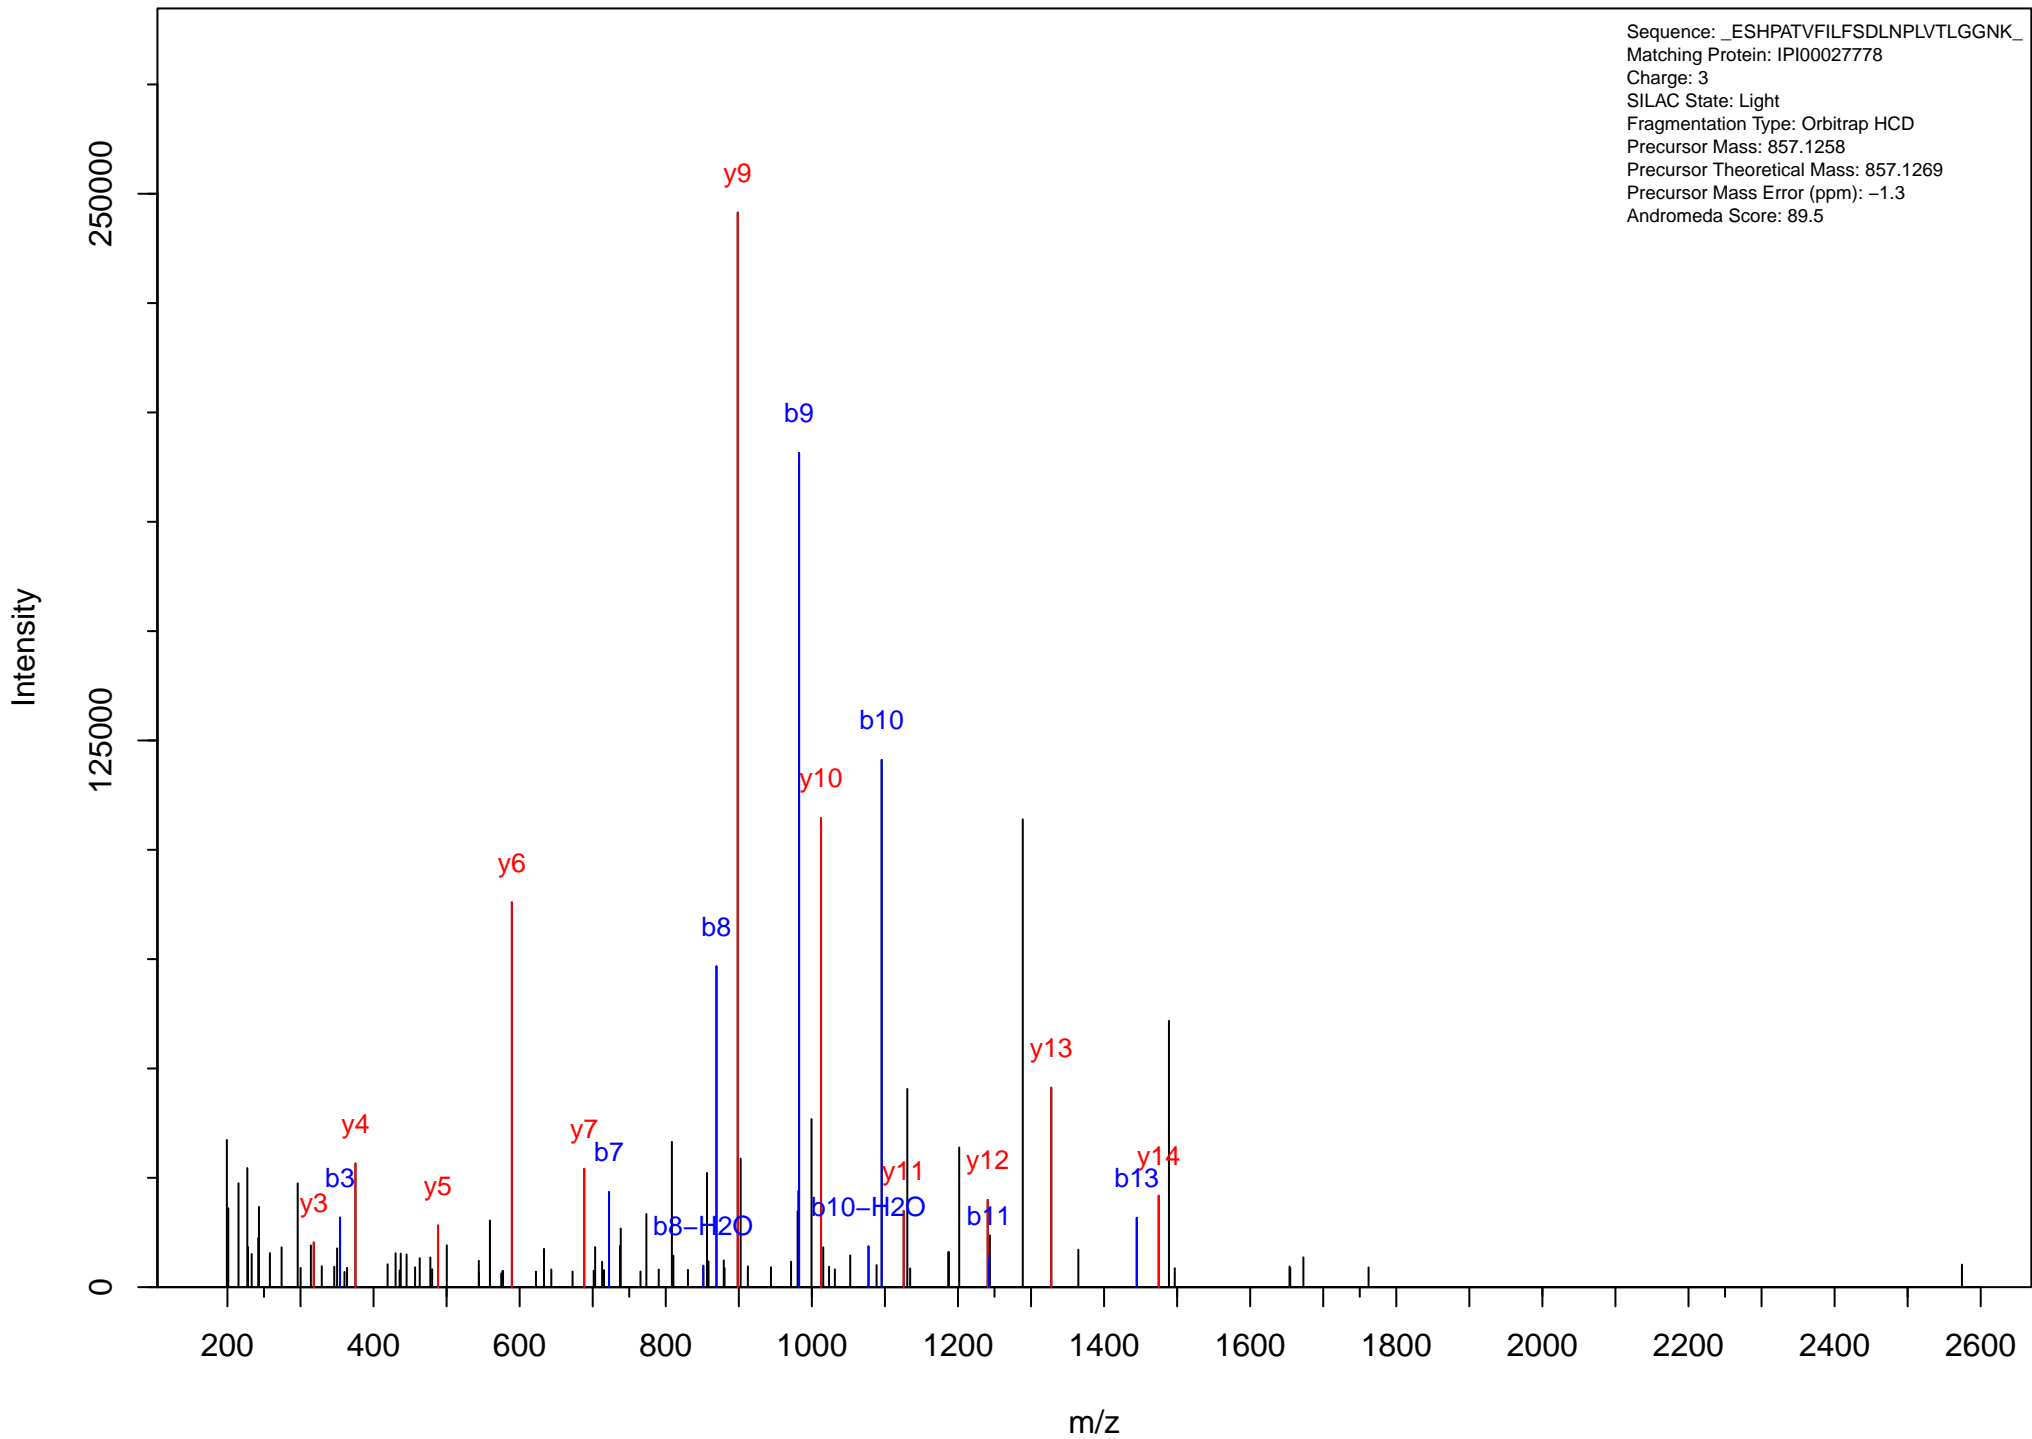

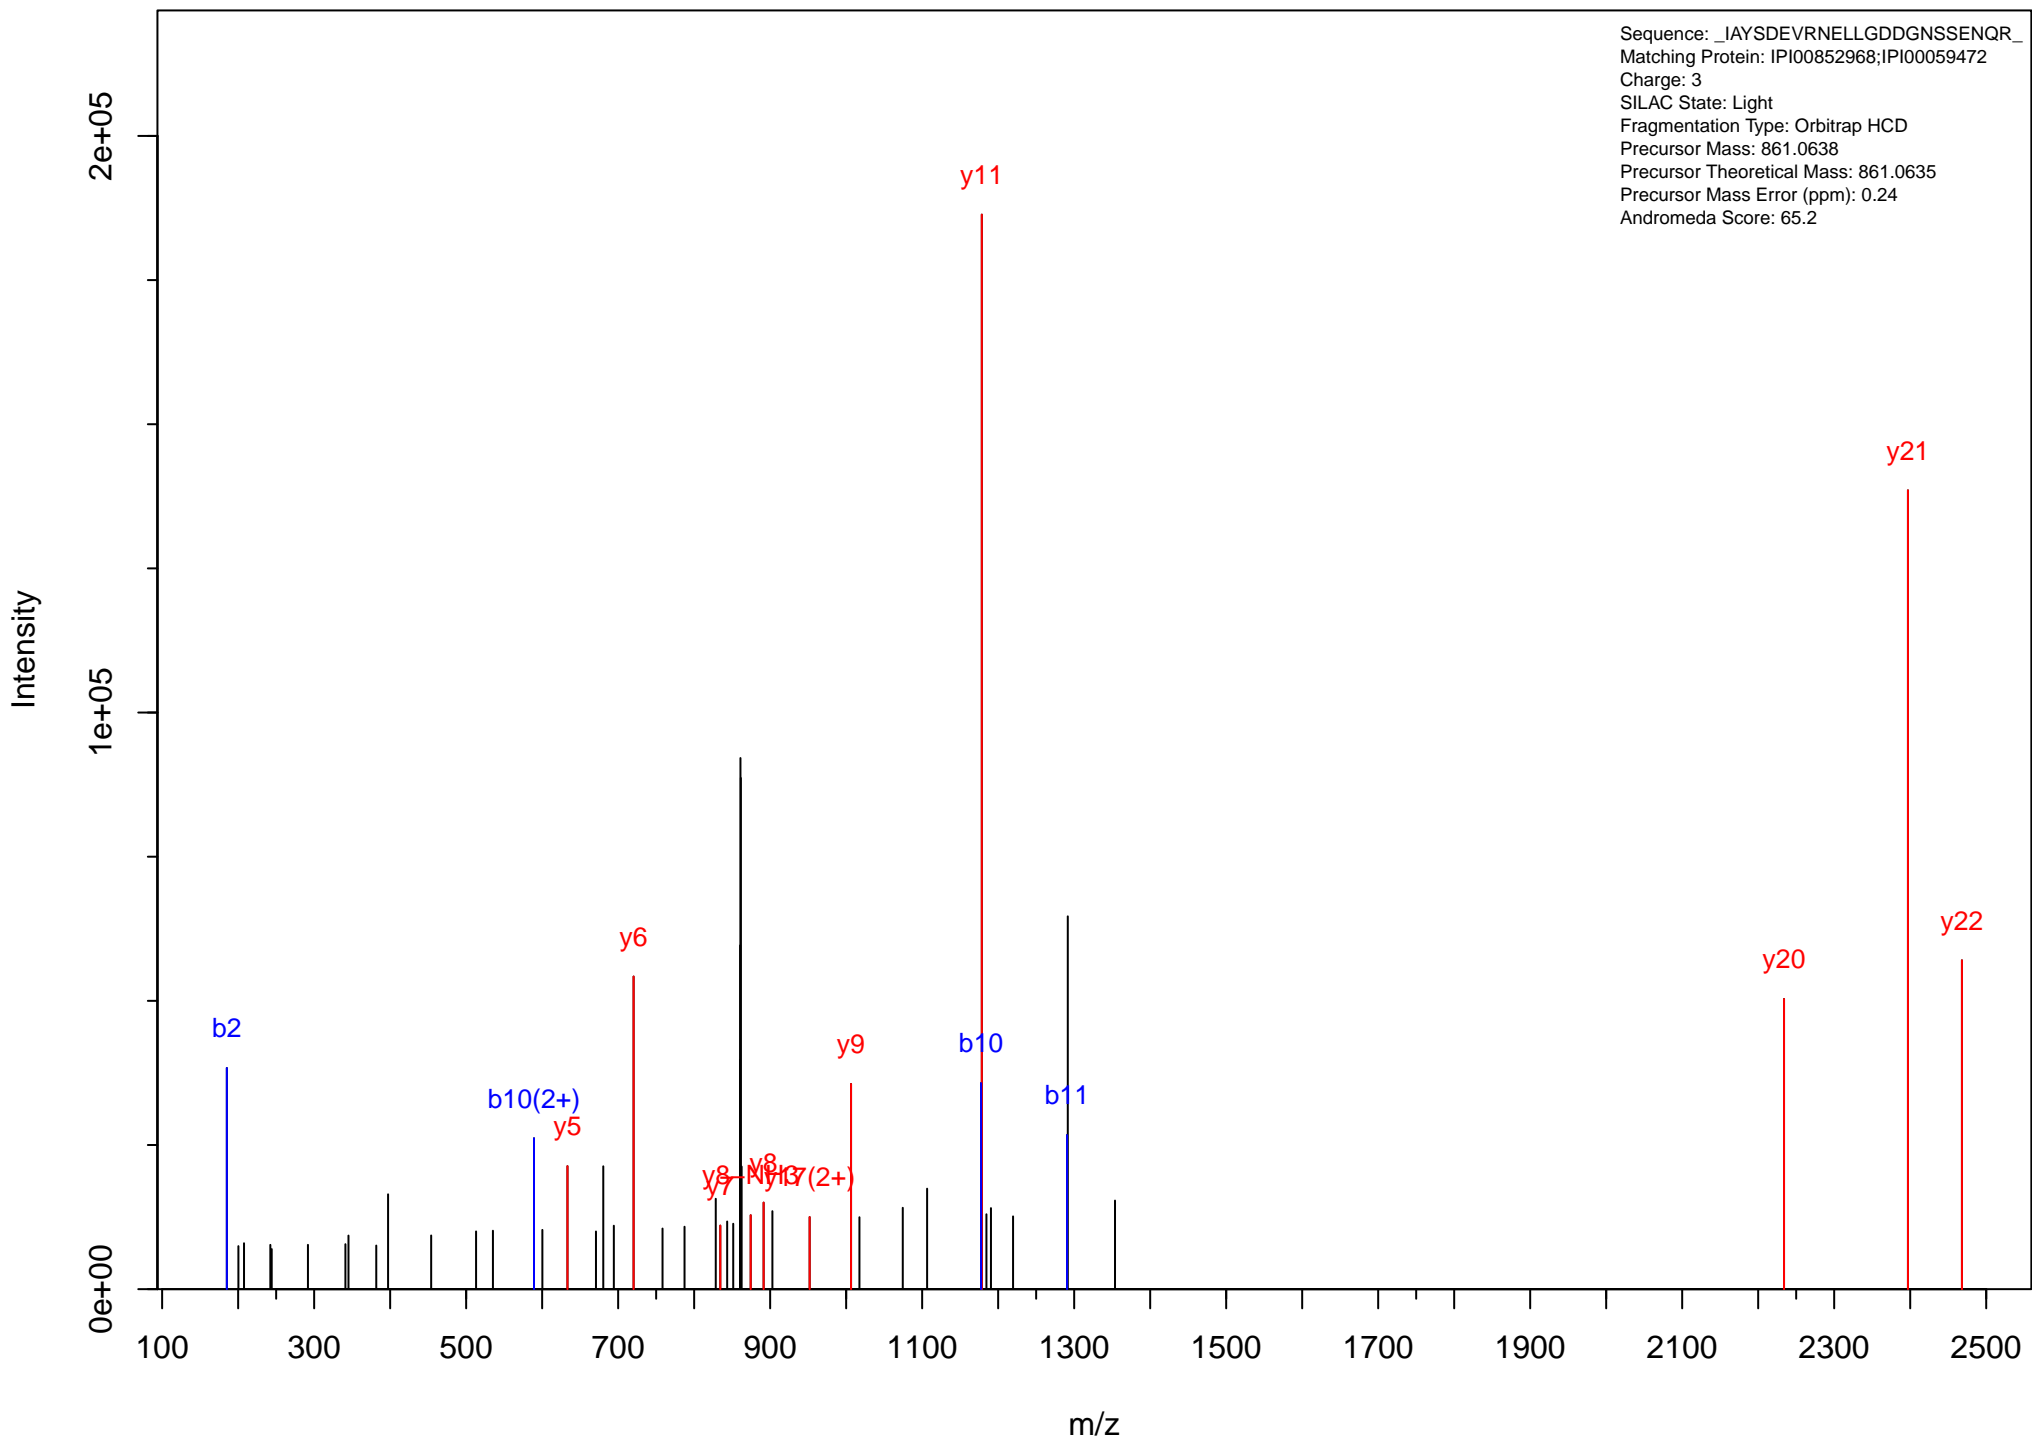

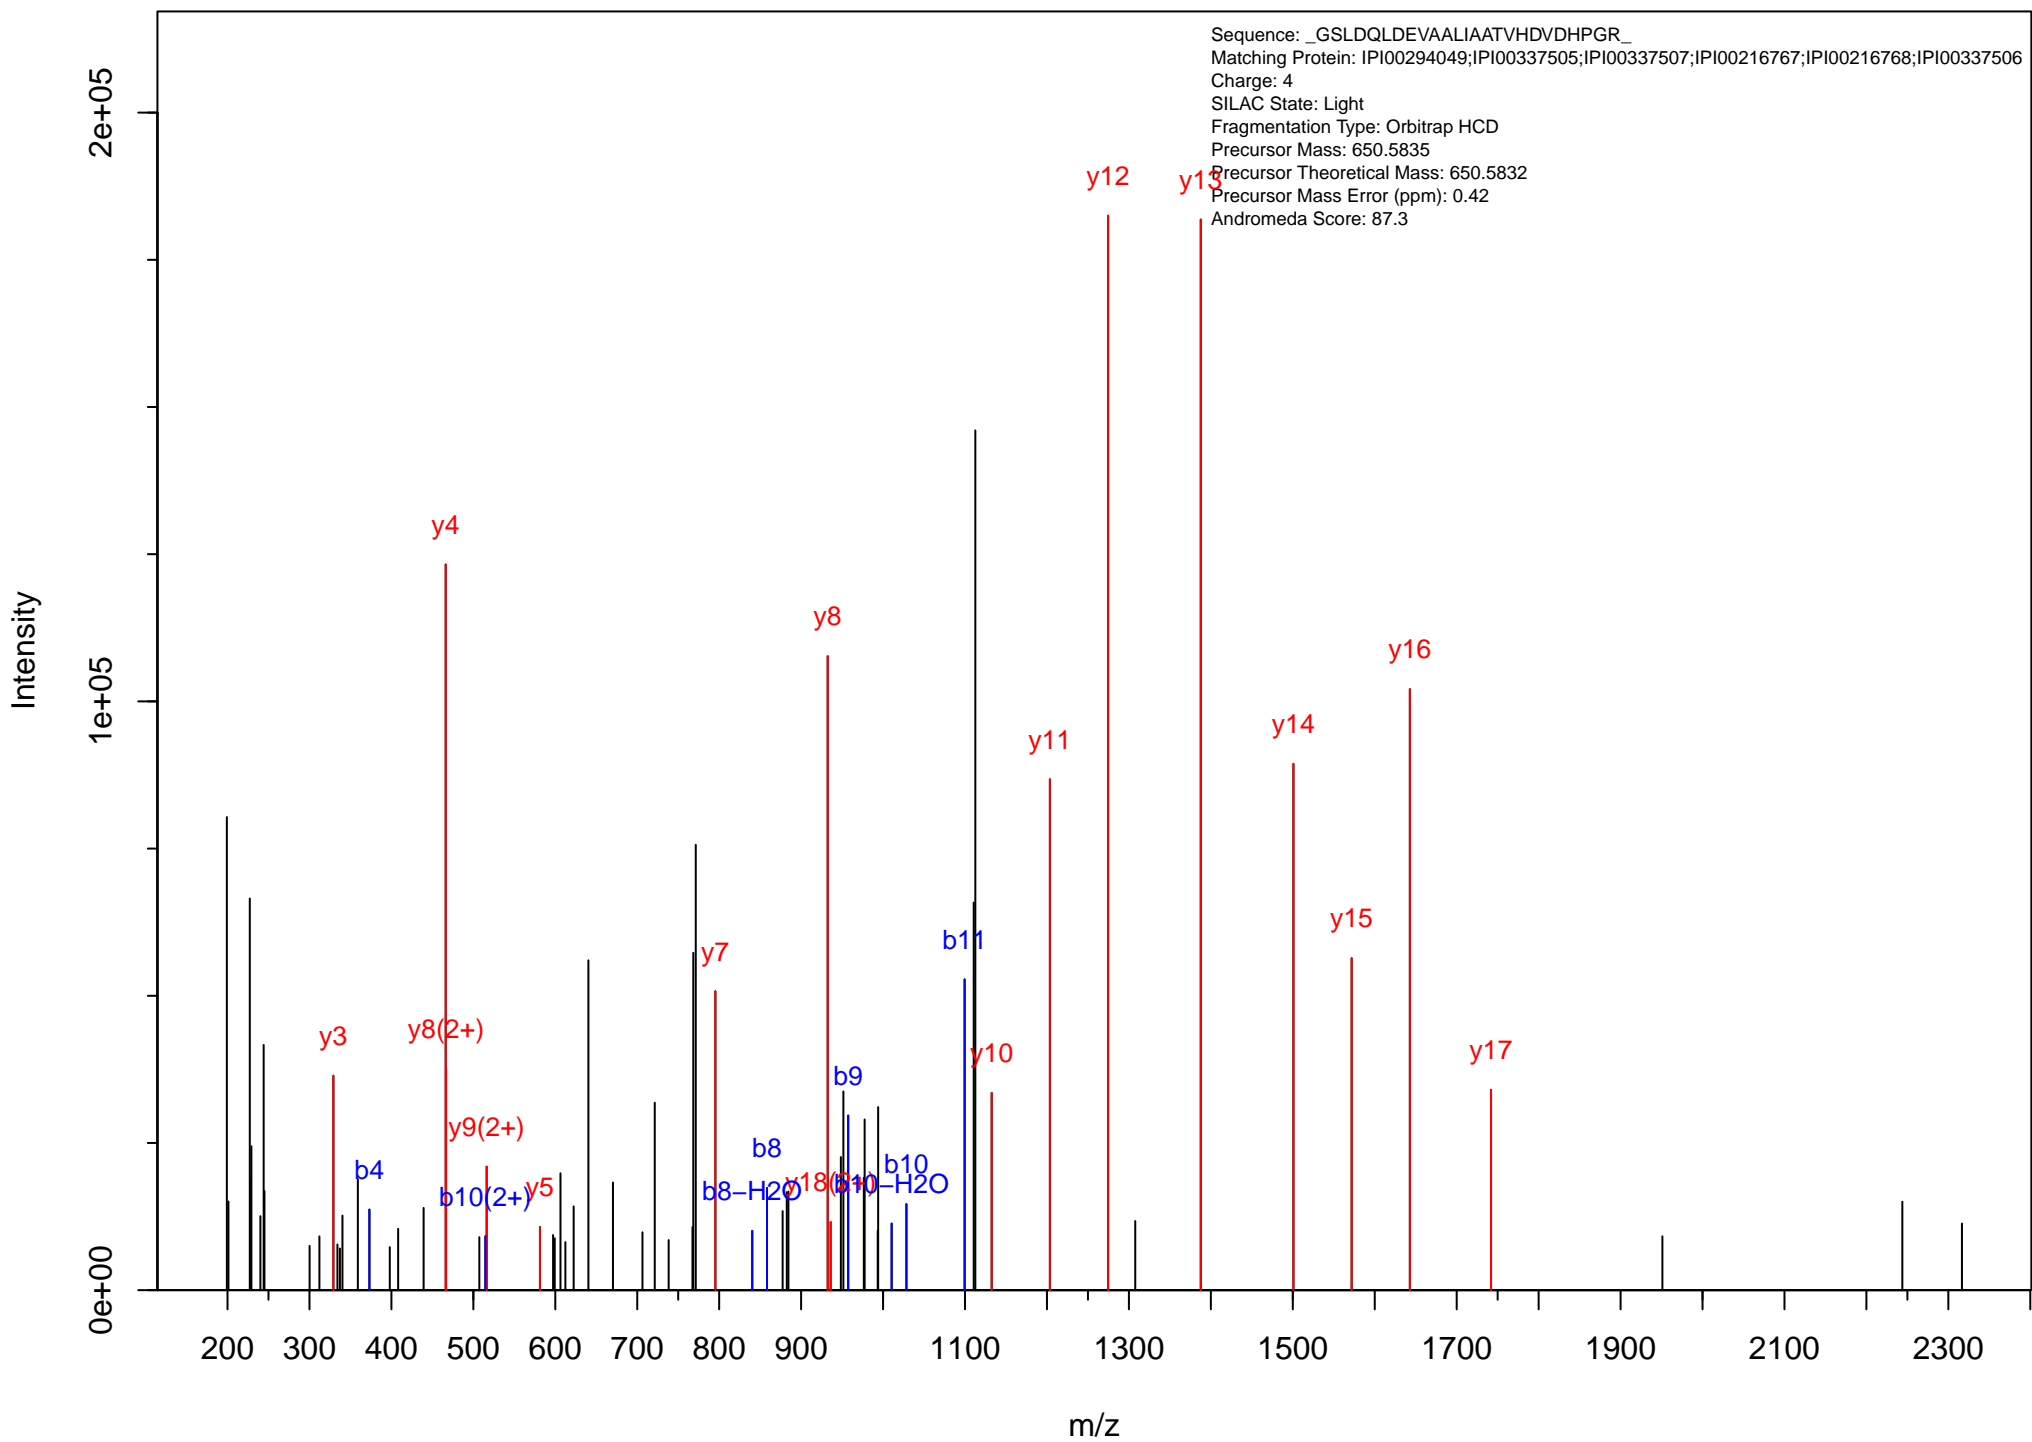

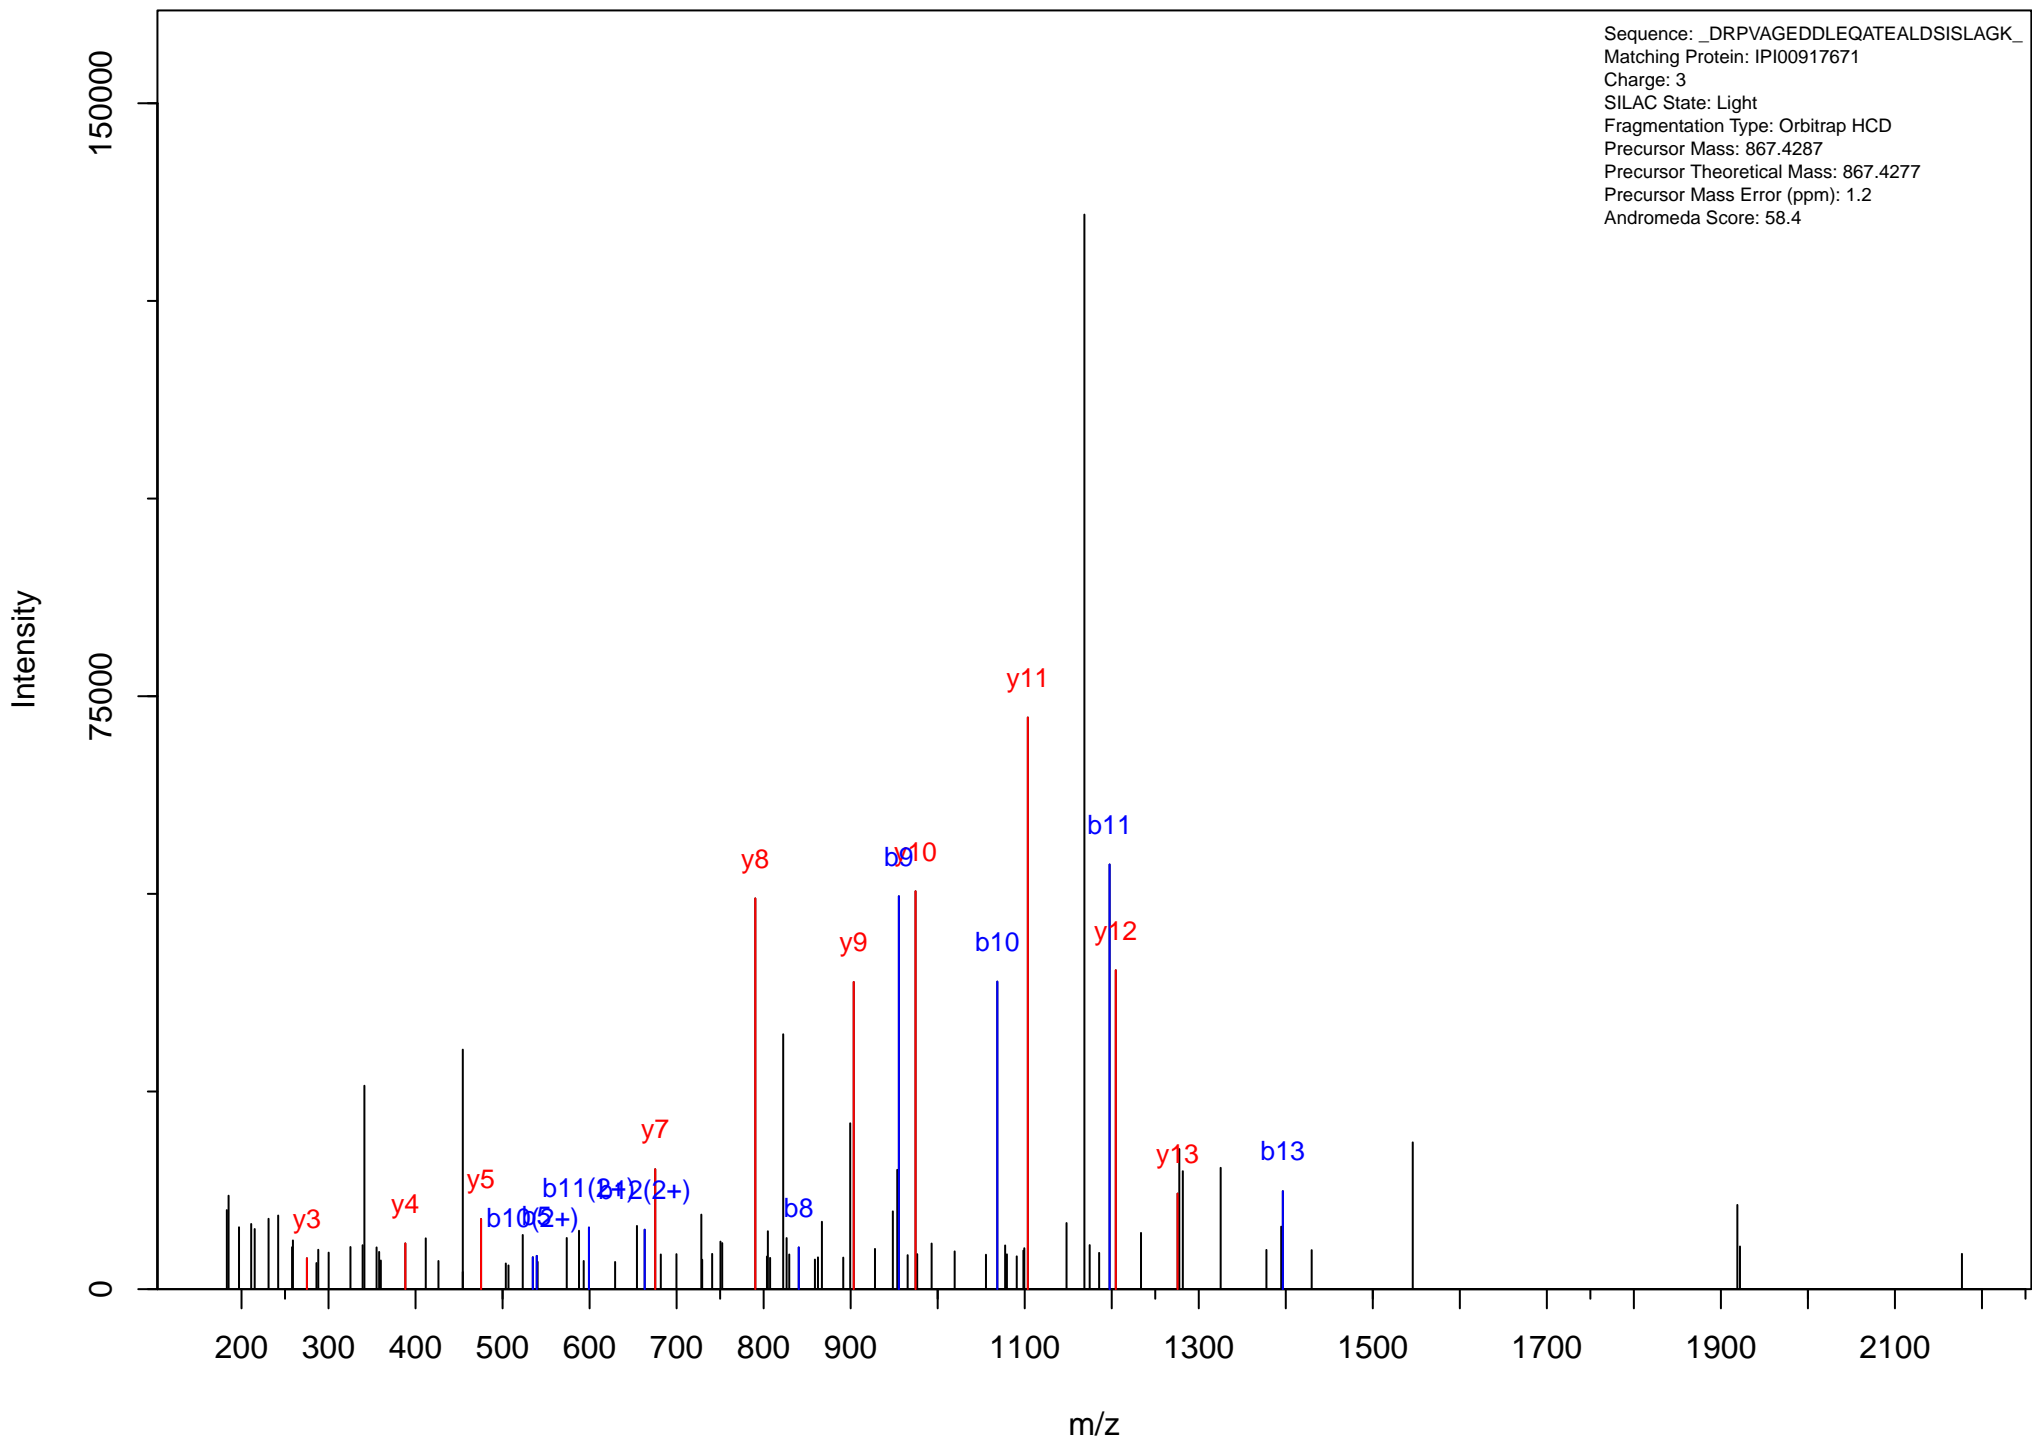

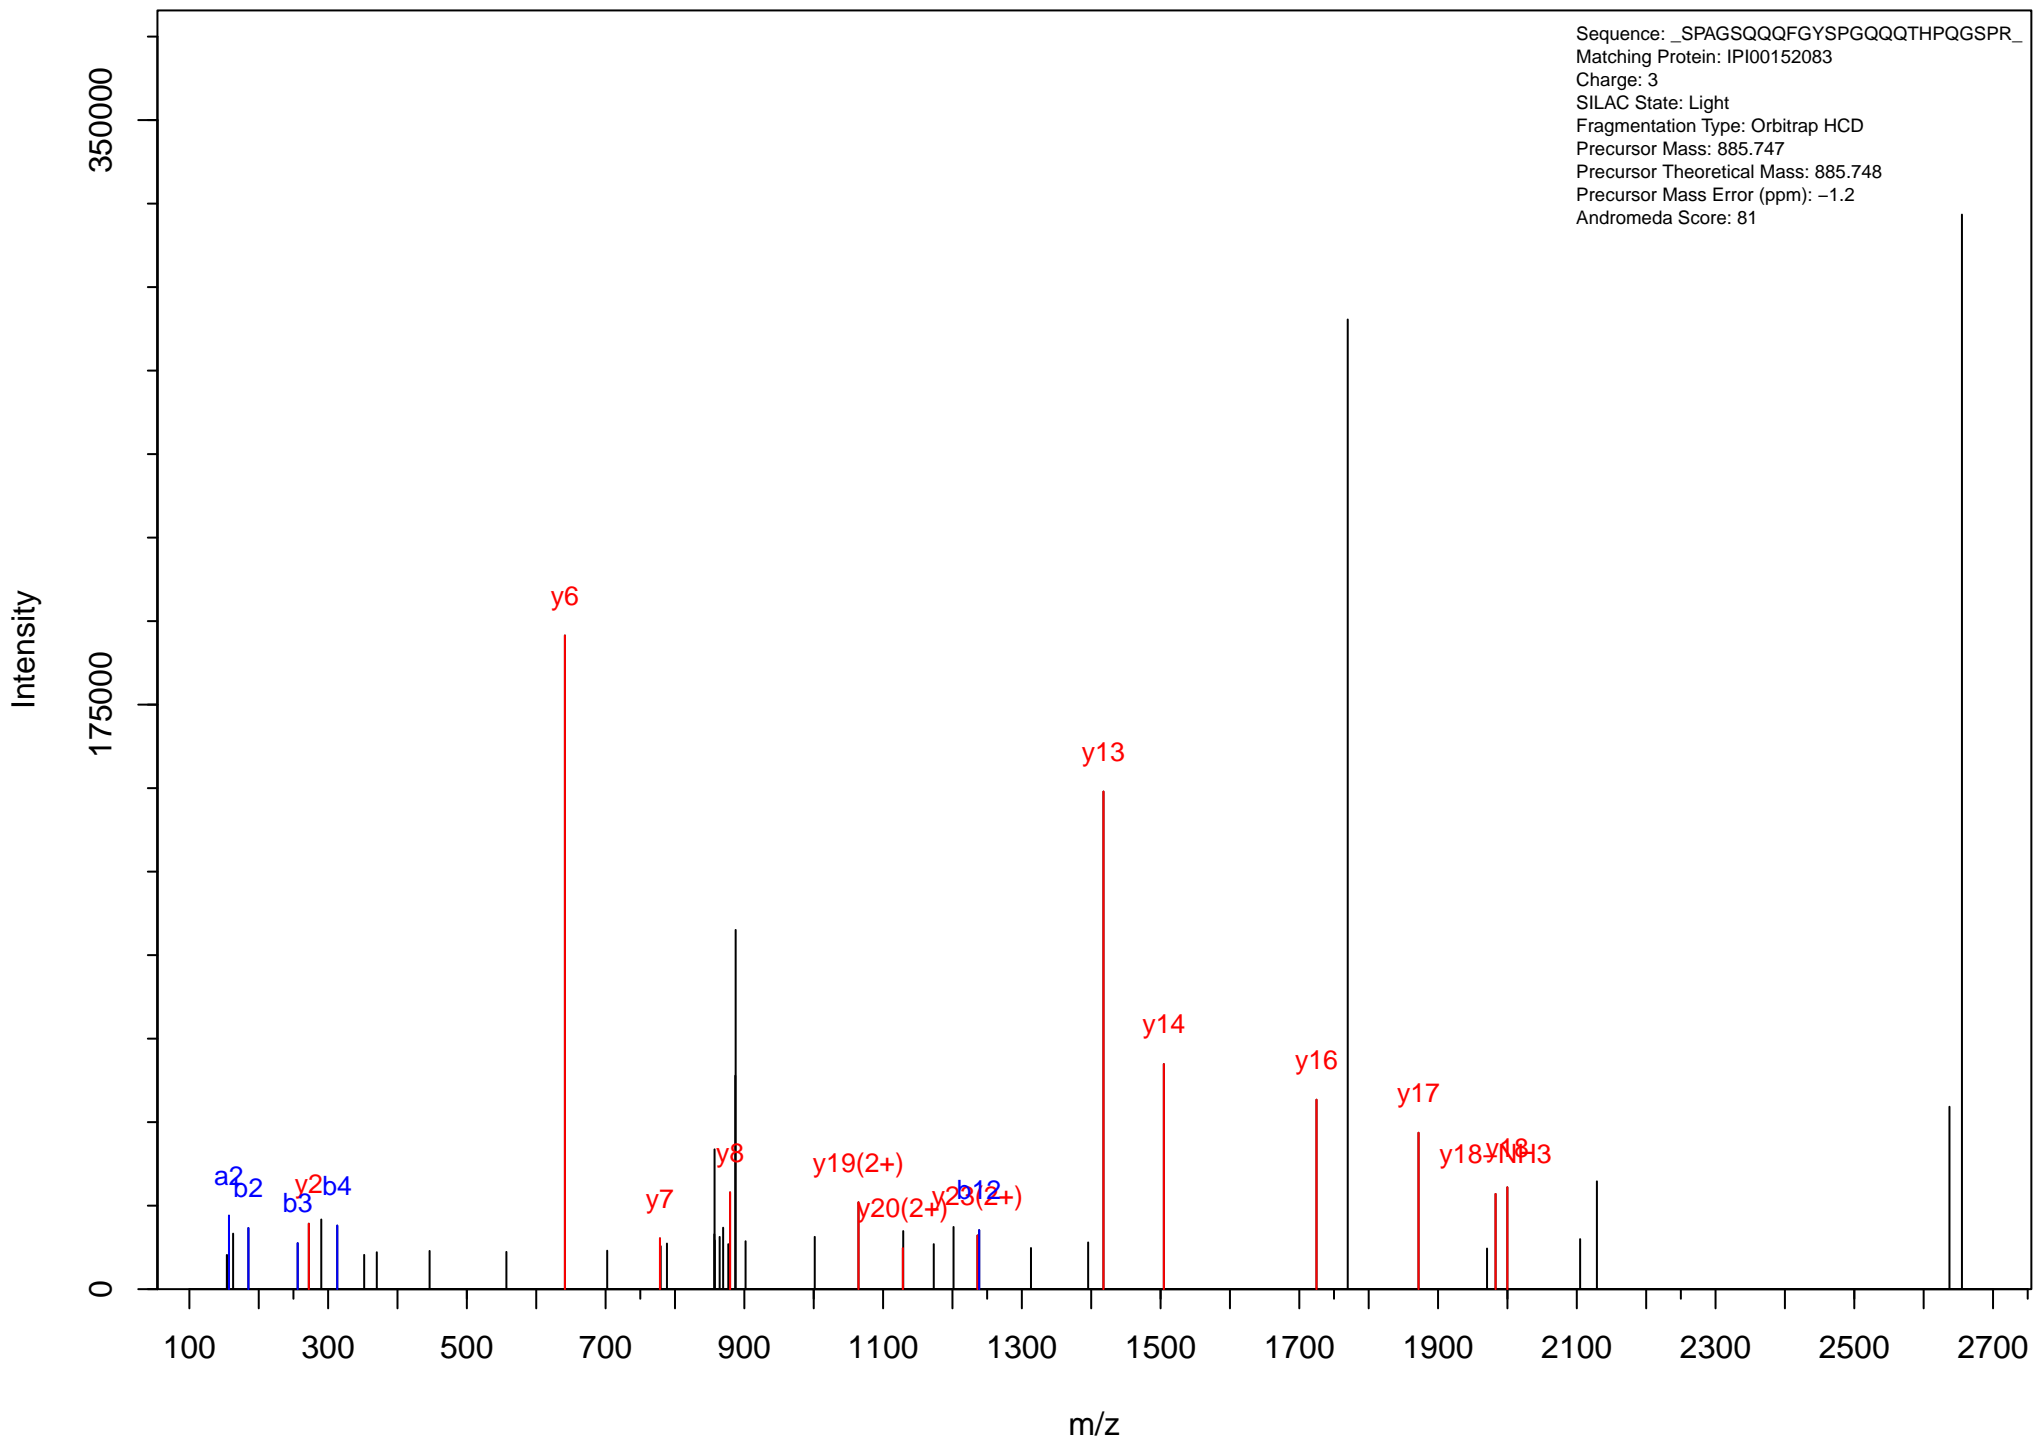

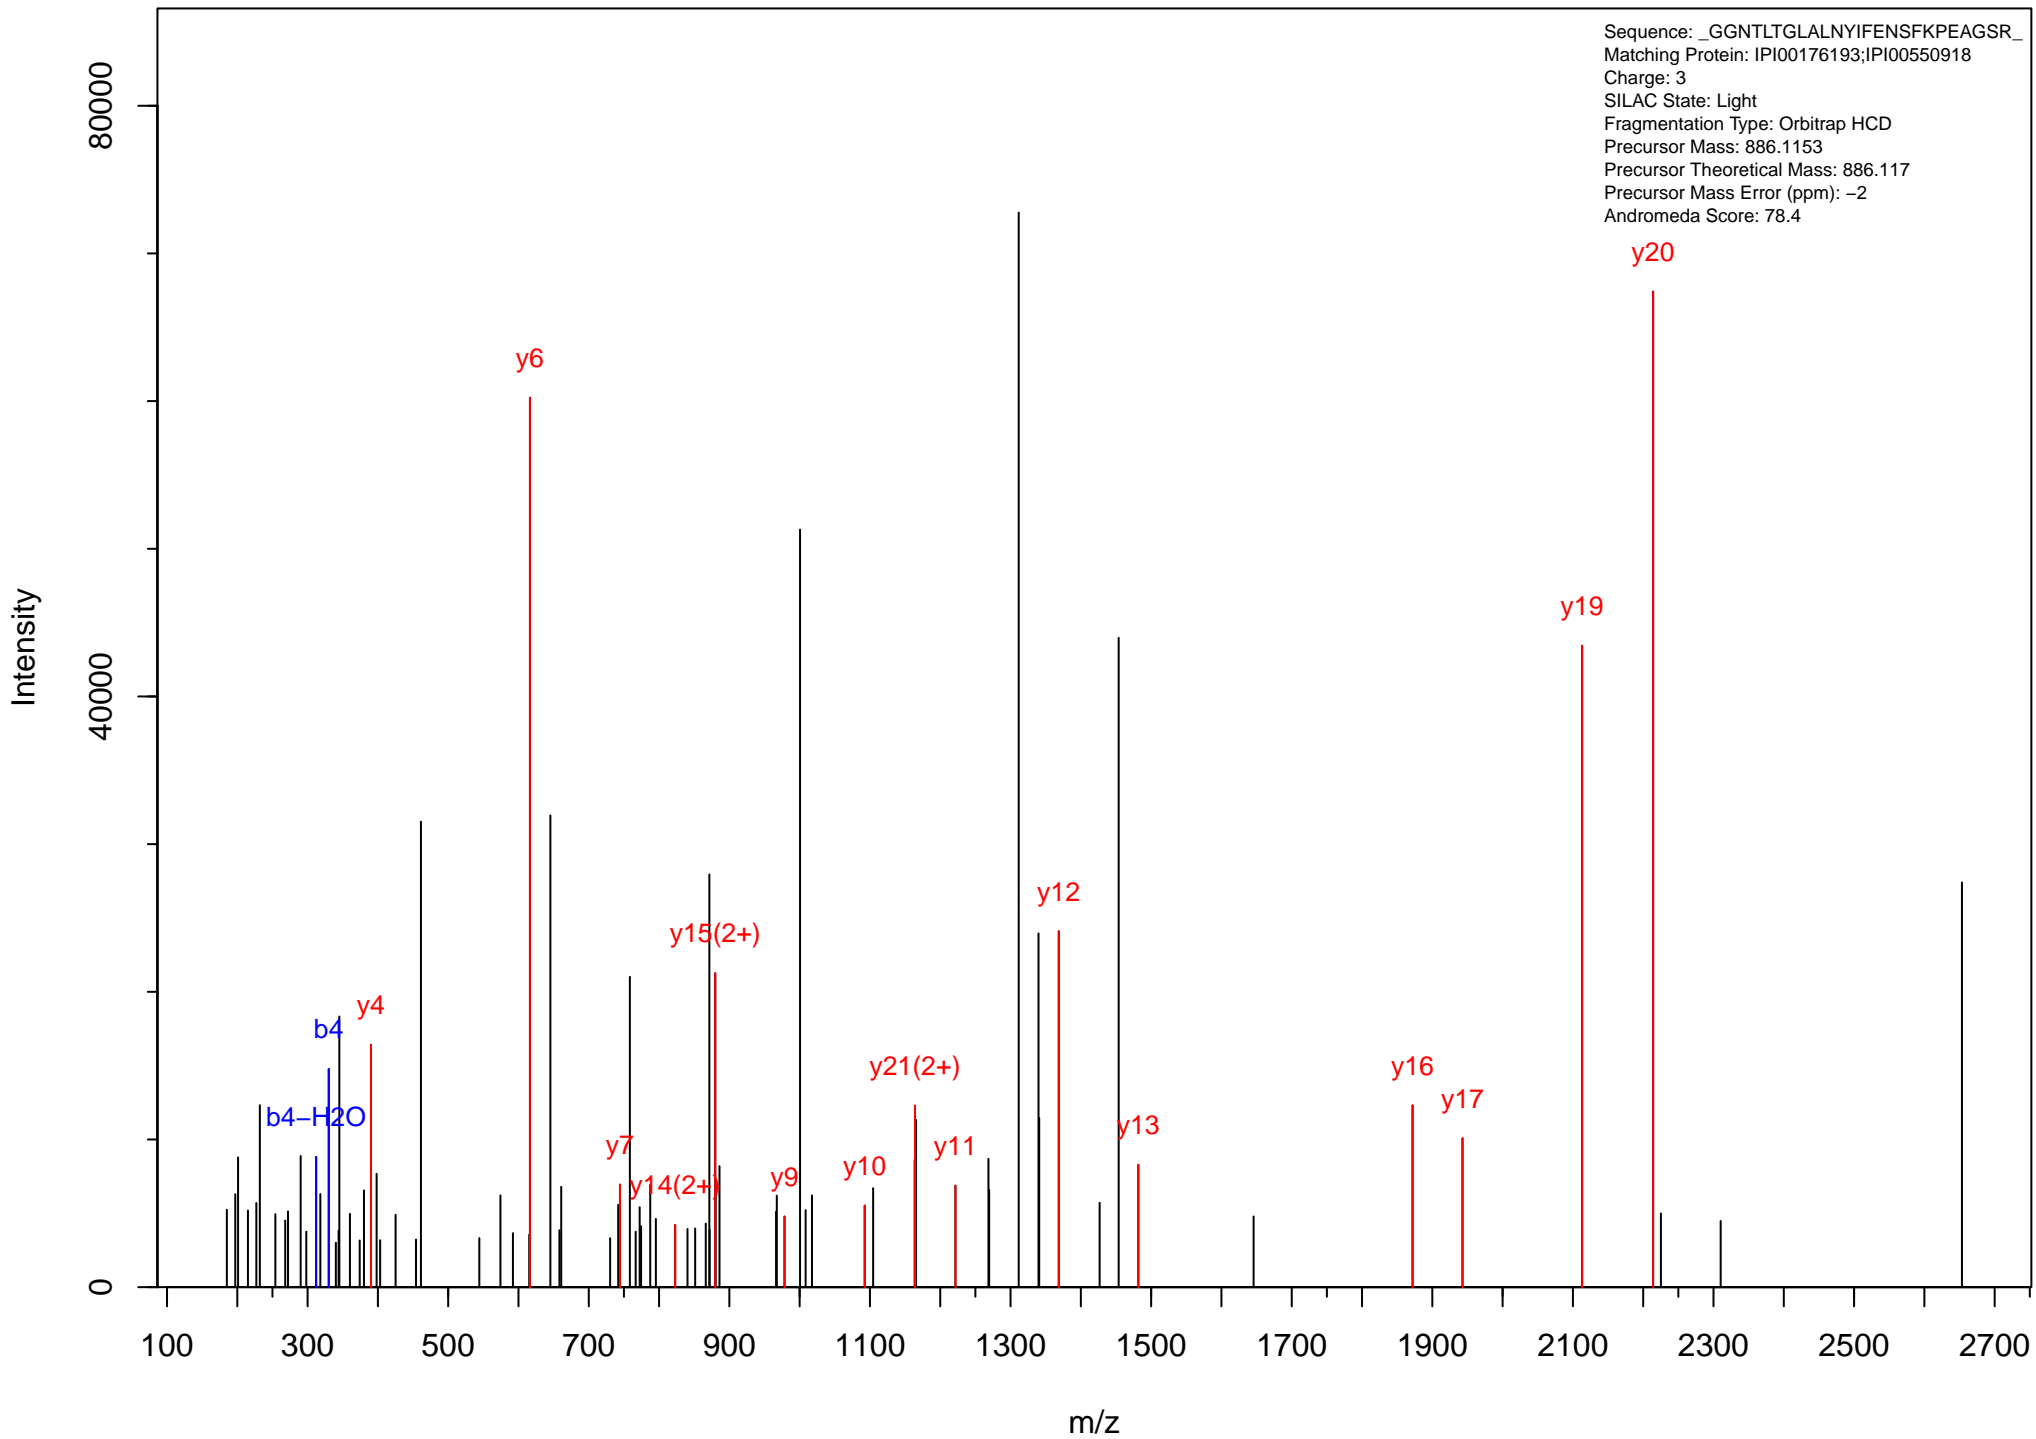

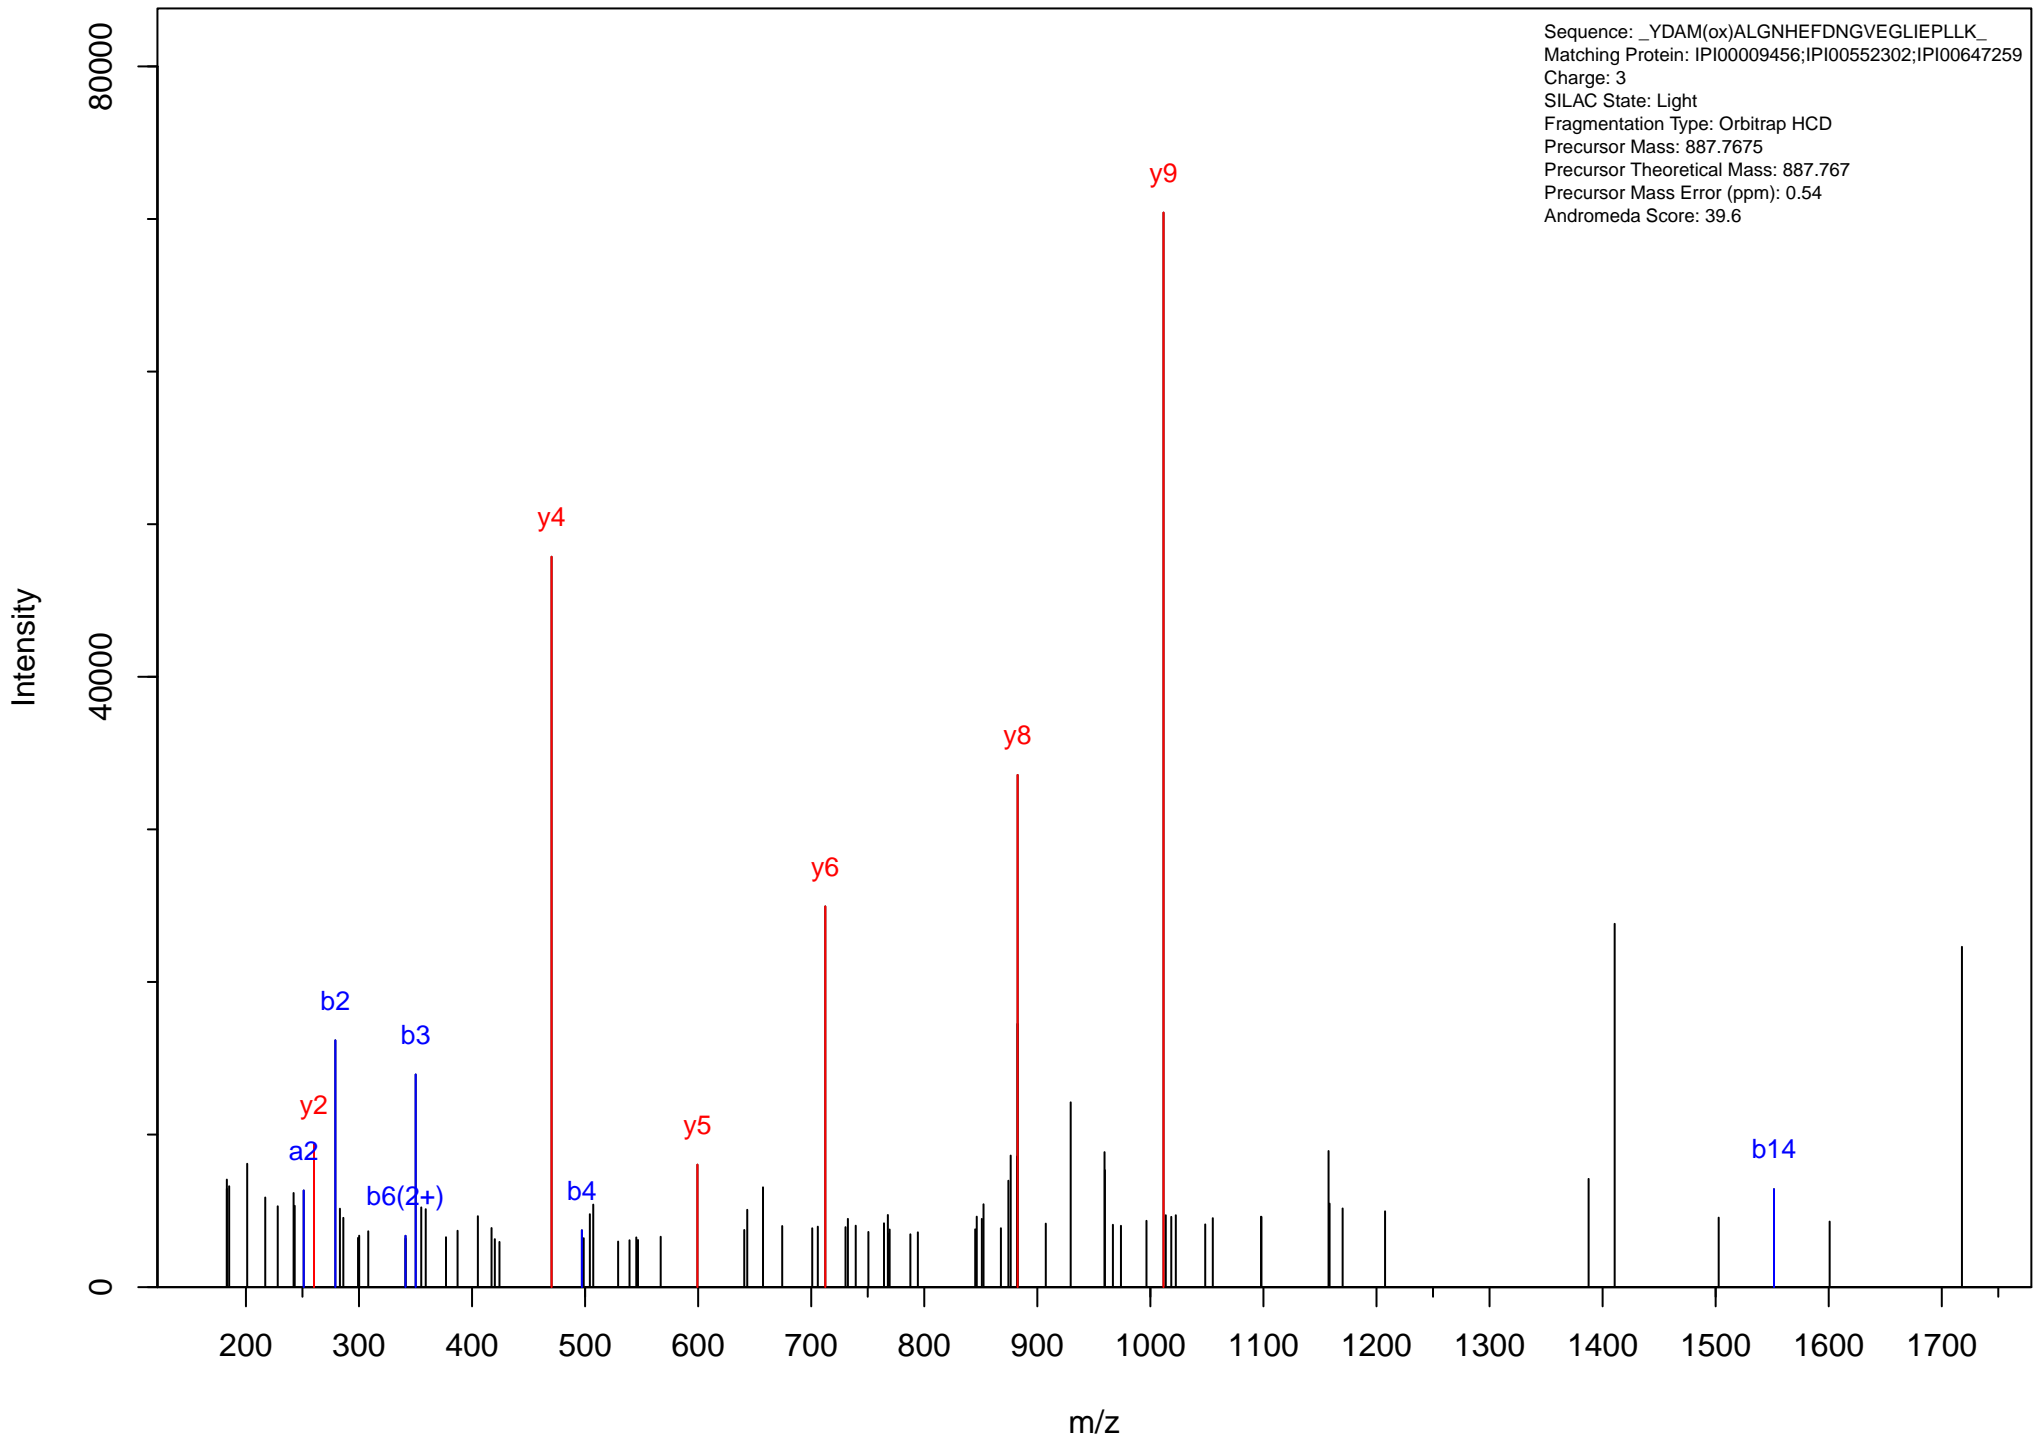

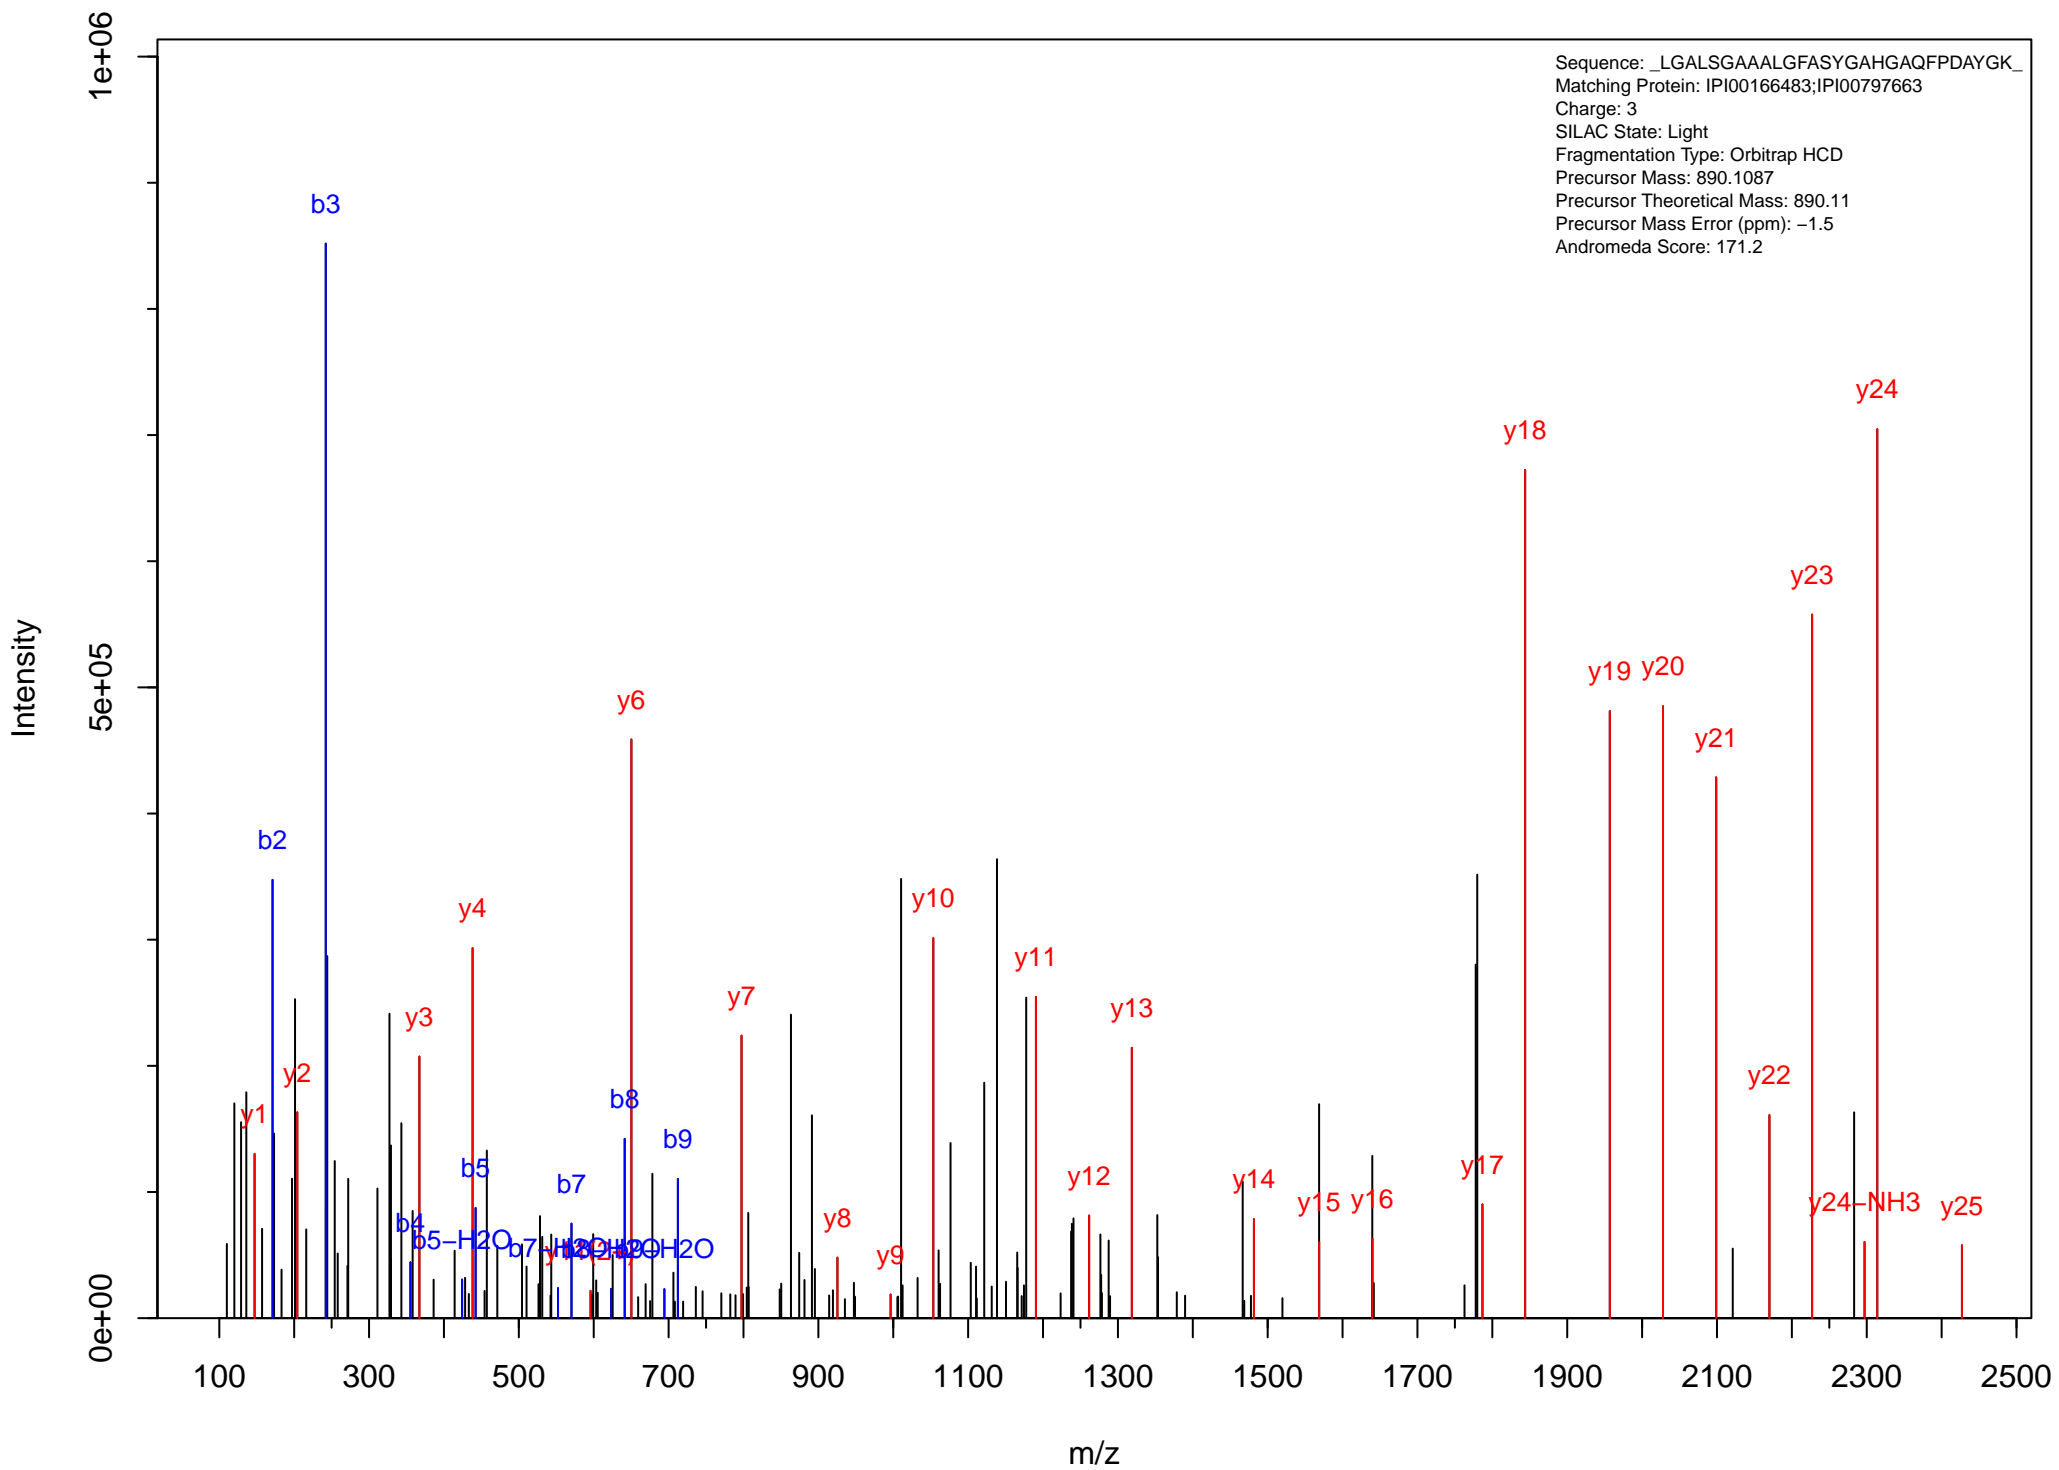

Intensity

2e+05

1e+05

0e+00

Sequence: \_VSVVEPGNFIAATSLYSPESIQAIK\_  
Matching Protein: IPI00025341;IPI00925346  
Charge: 3  
SILAC State: Light  
Fragmentation Type: Orbitrap HCD  
Precursor Mass: 897.8121  
Precursor Theoretical Mass: 897.8128  
Precursor Mass Error (ppm): -0.87  
Andromeda Score: 66.4

m/z

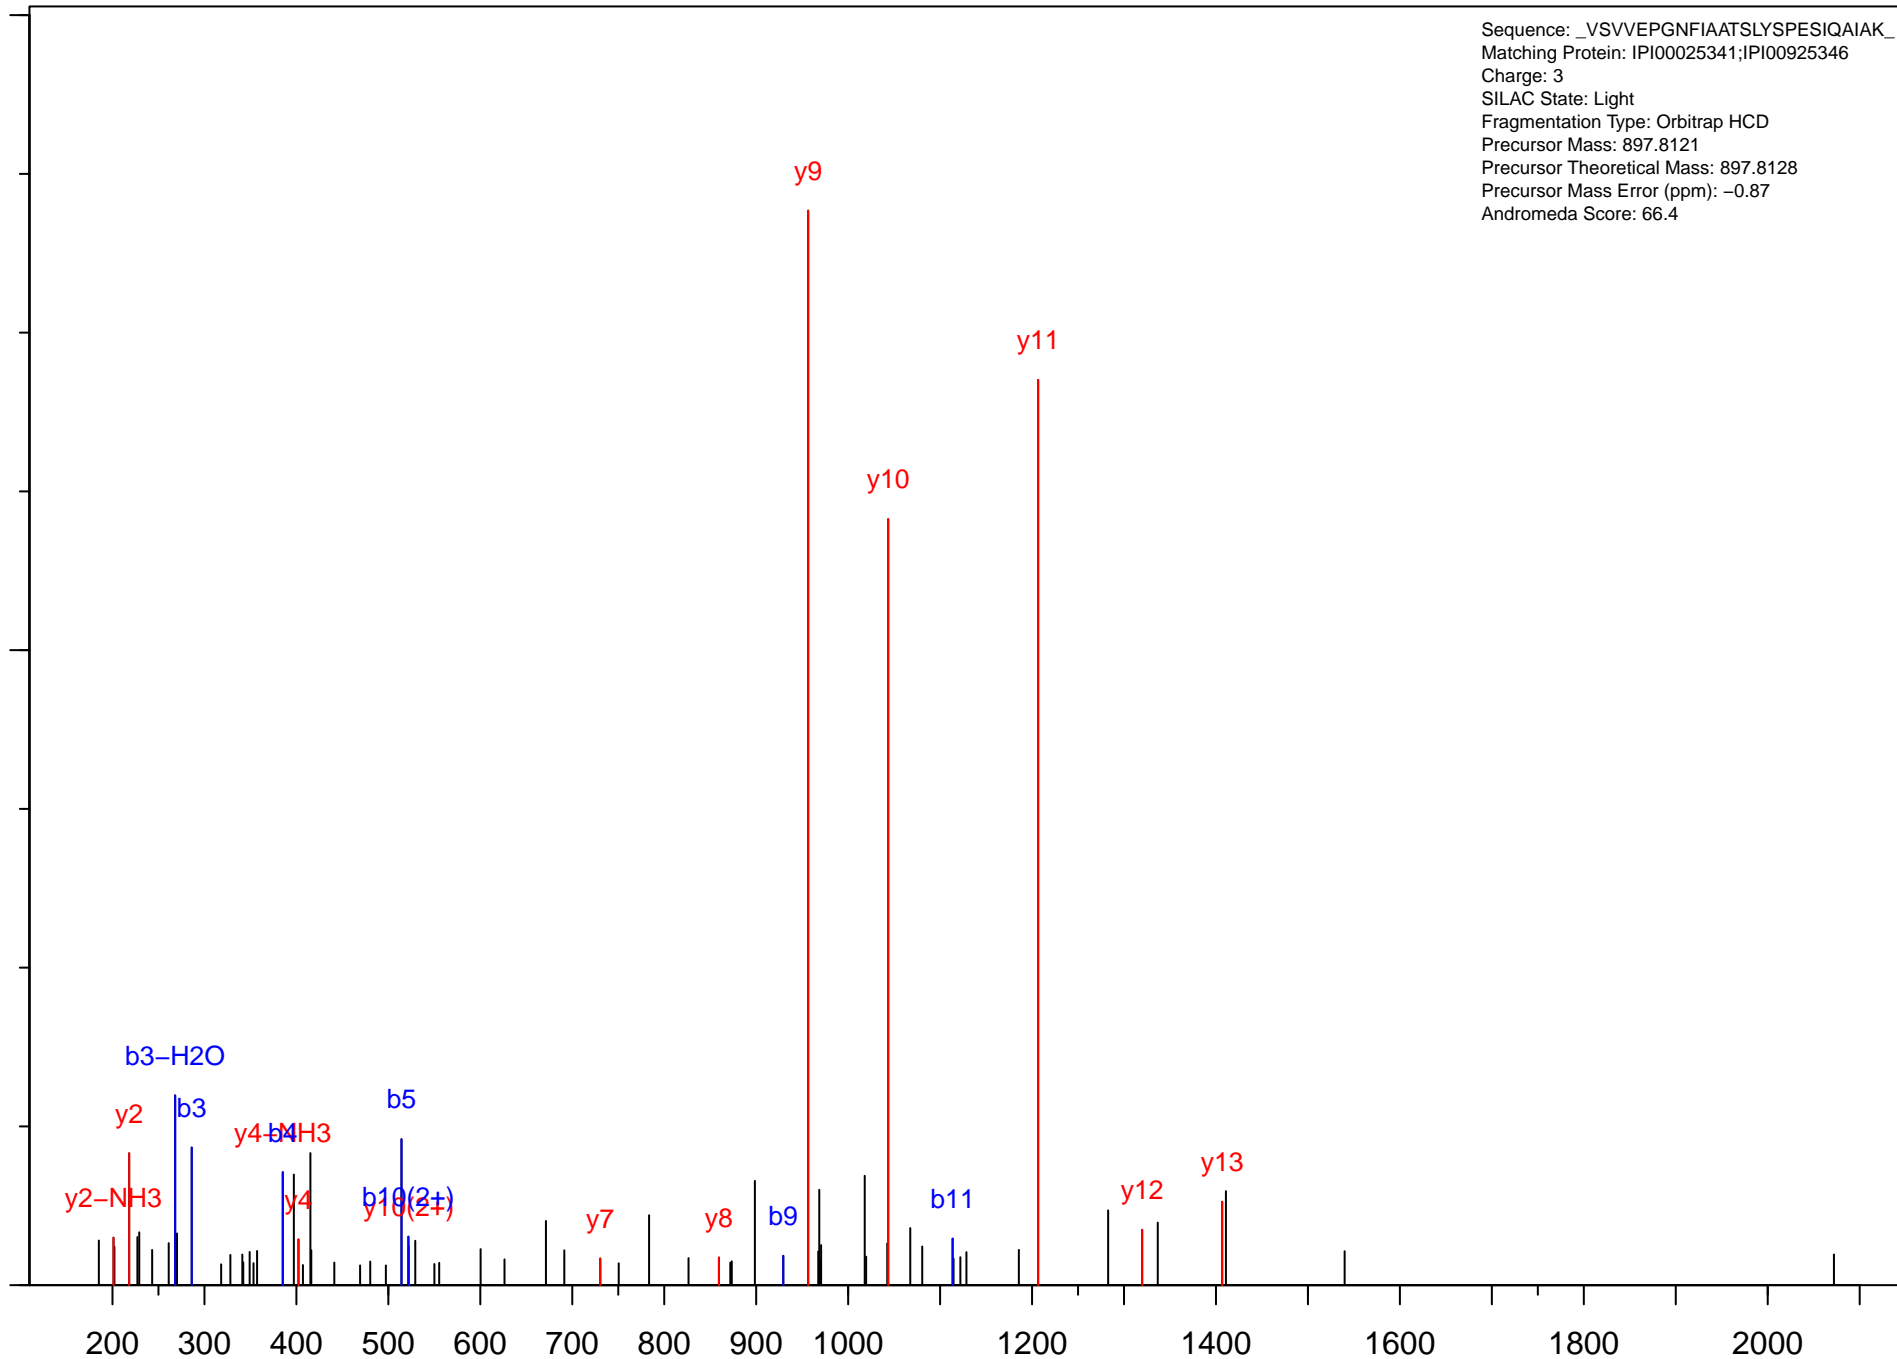

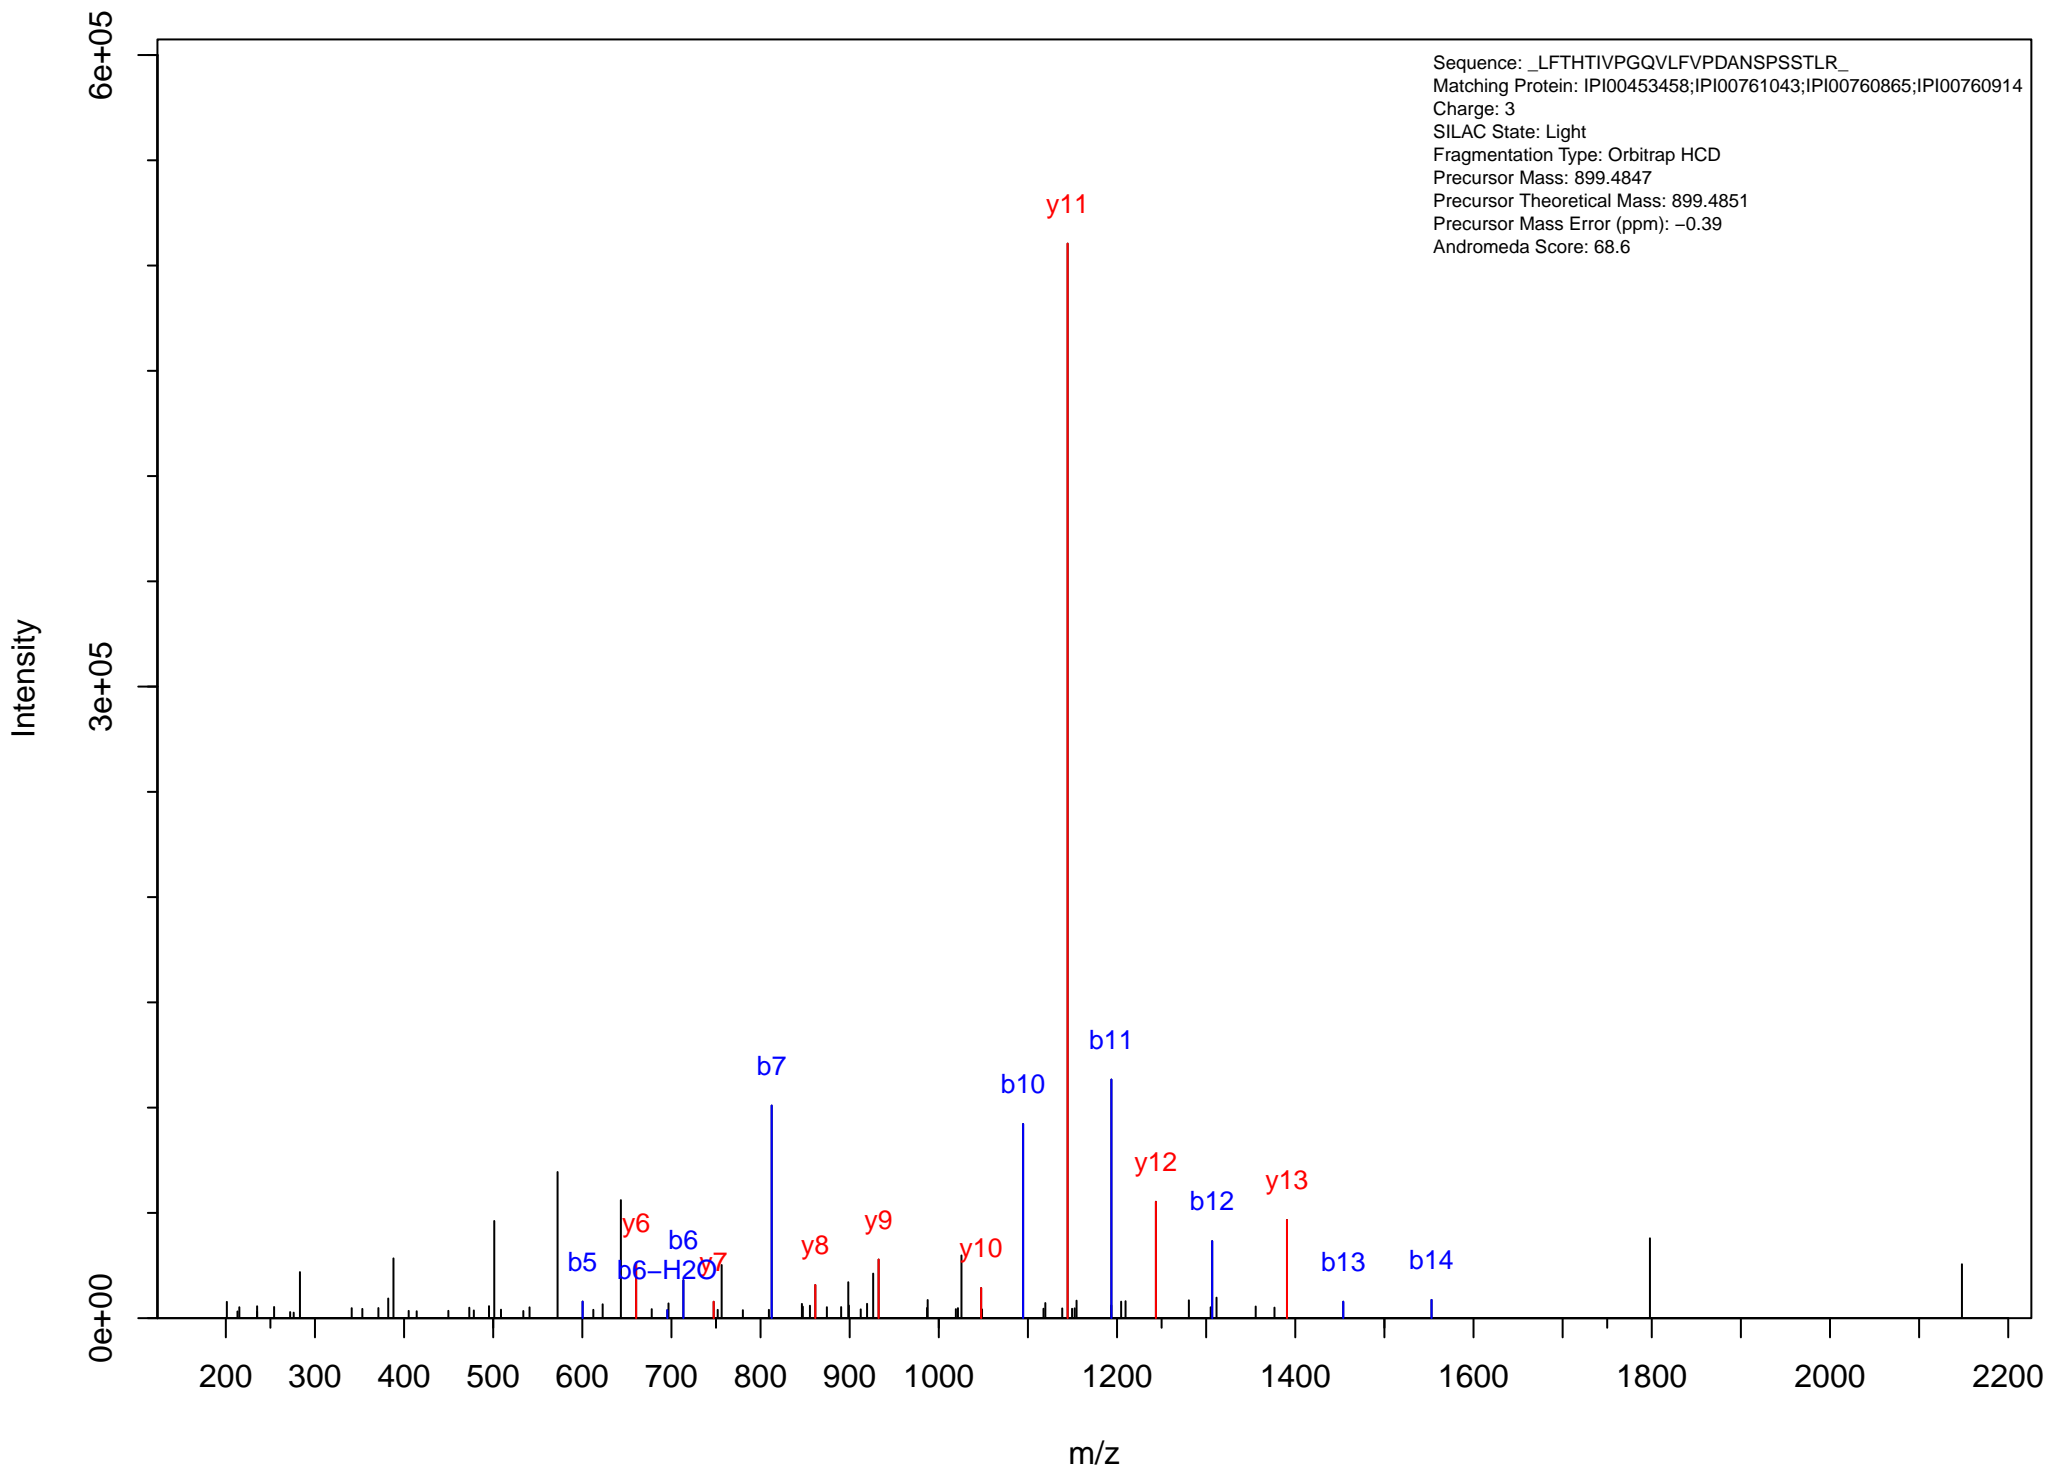

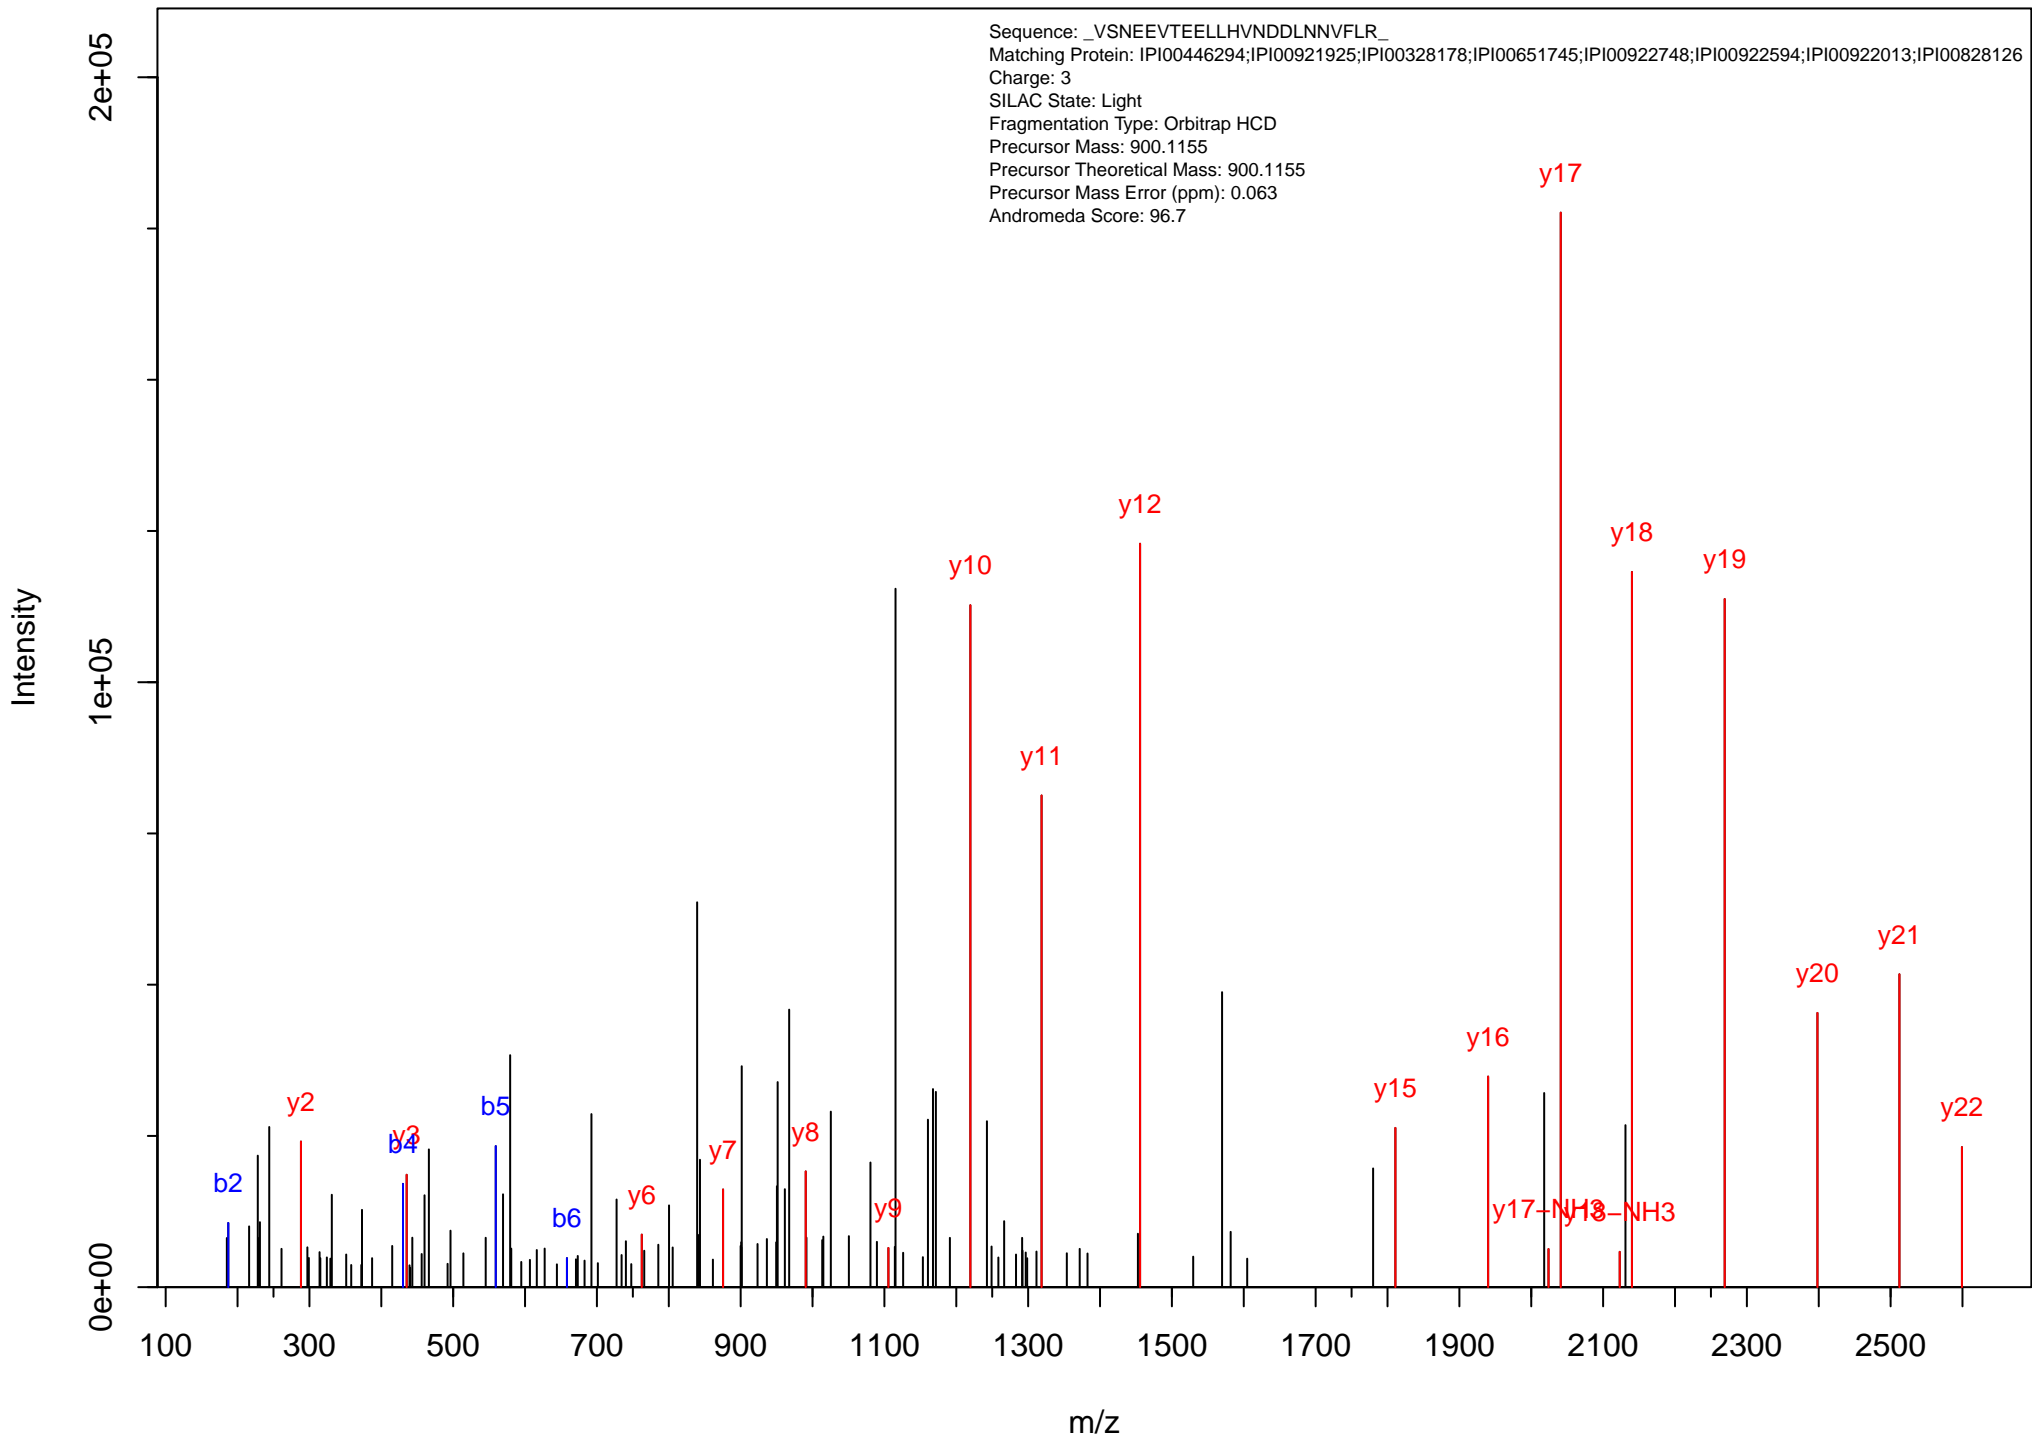

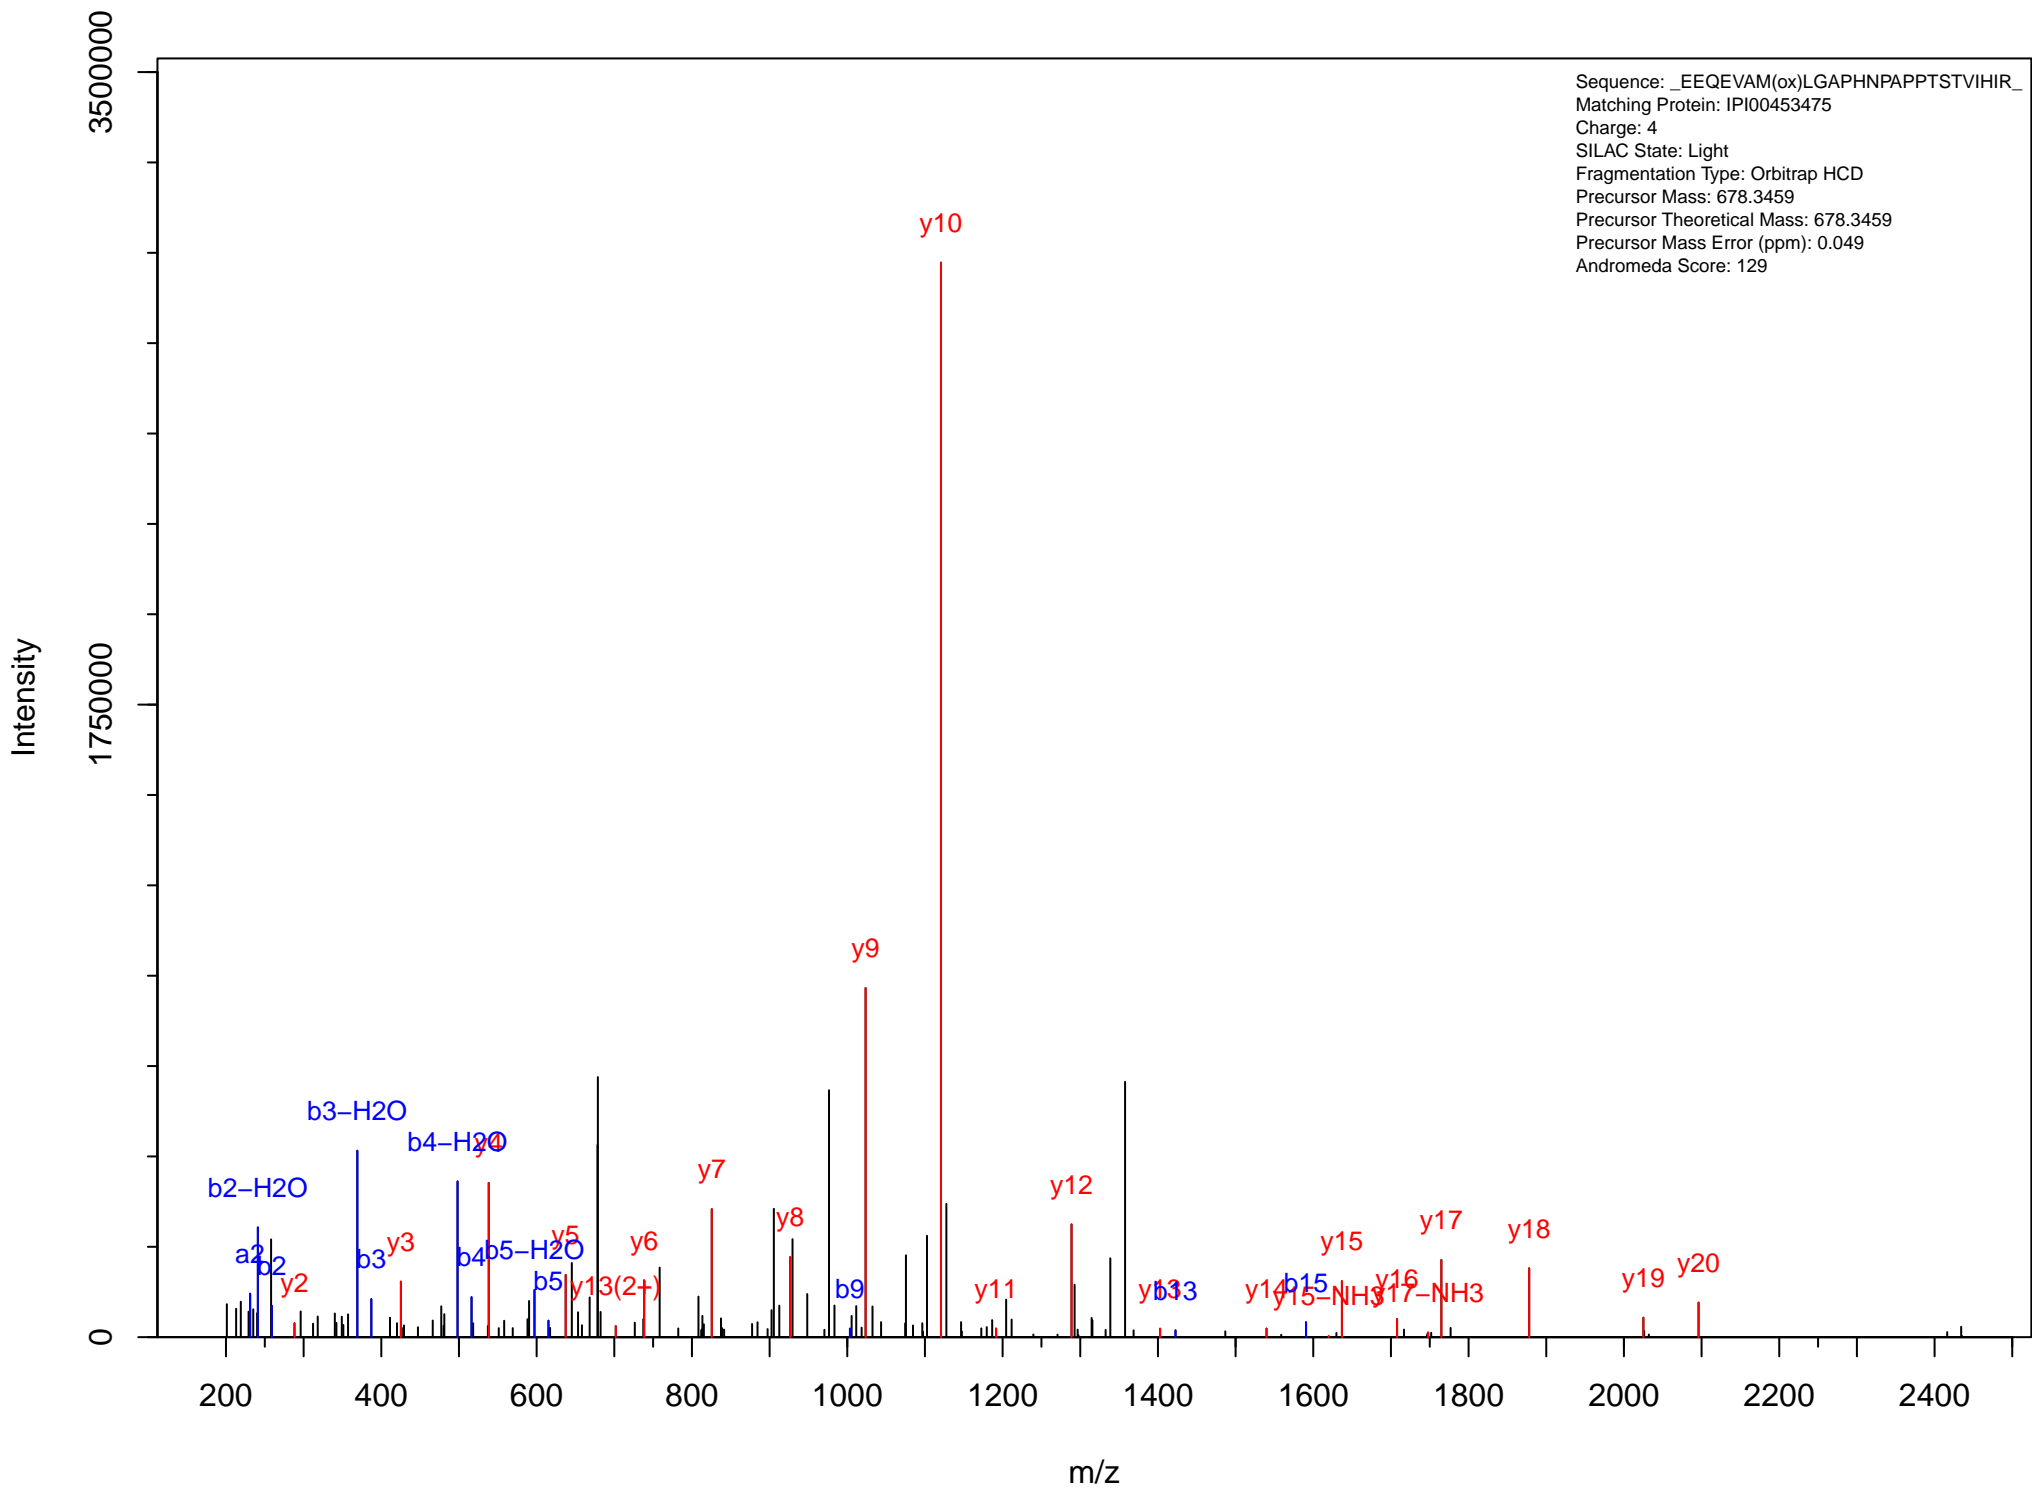

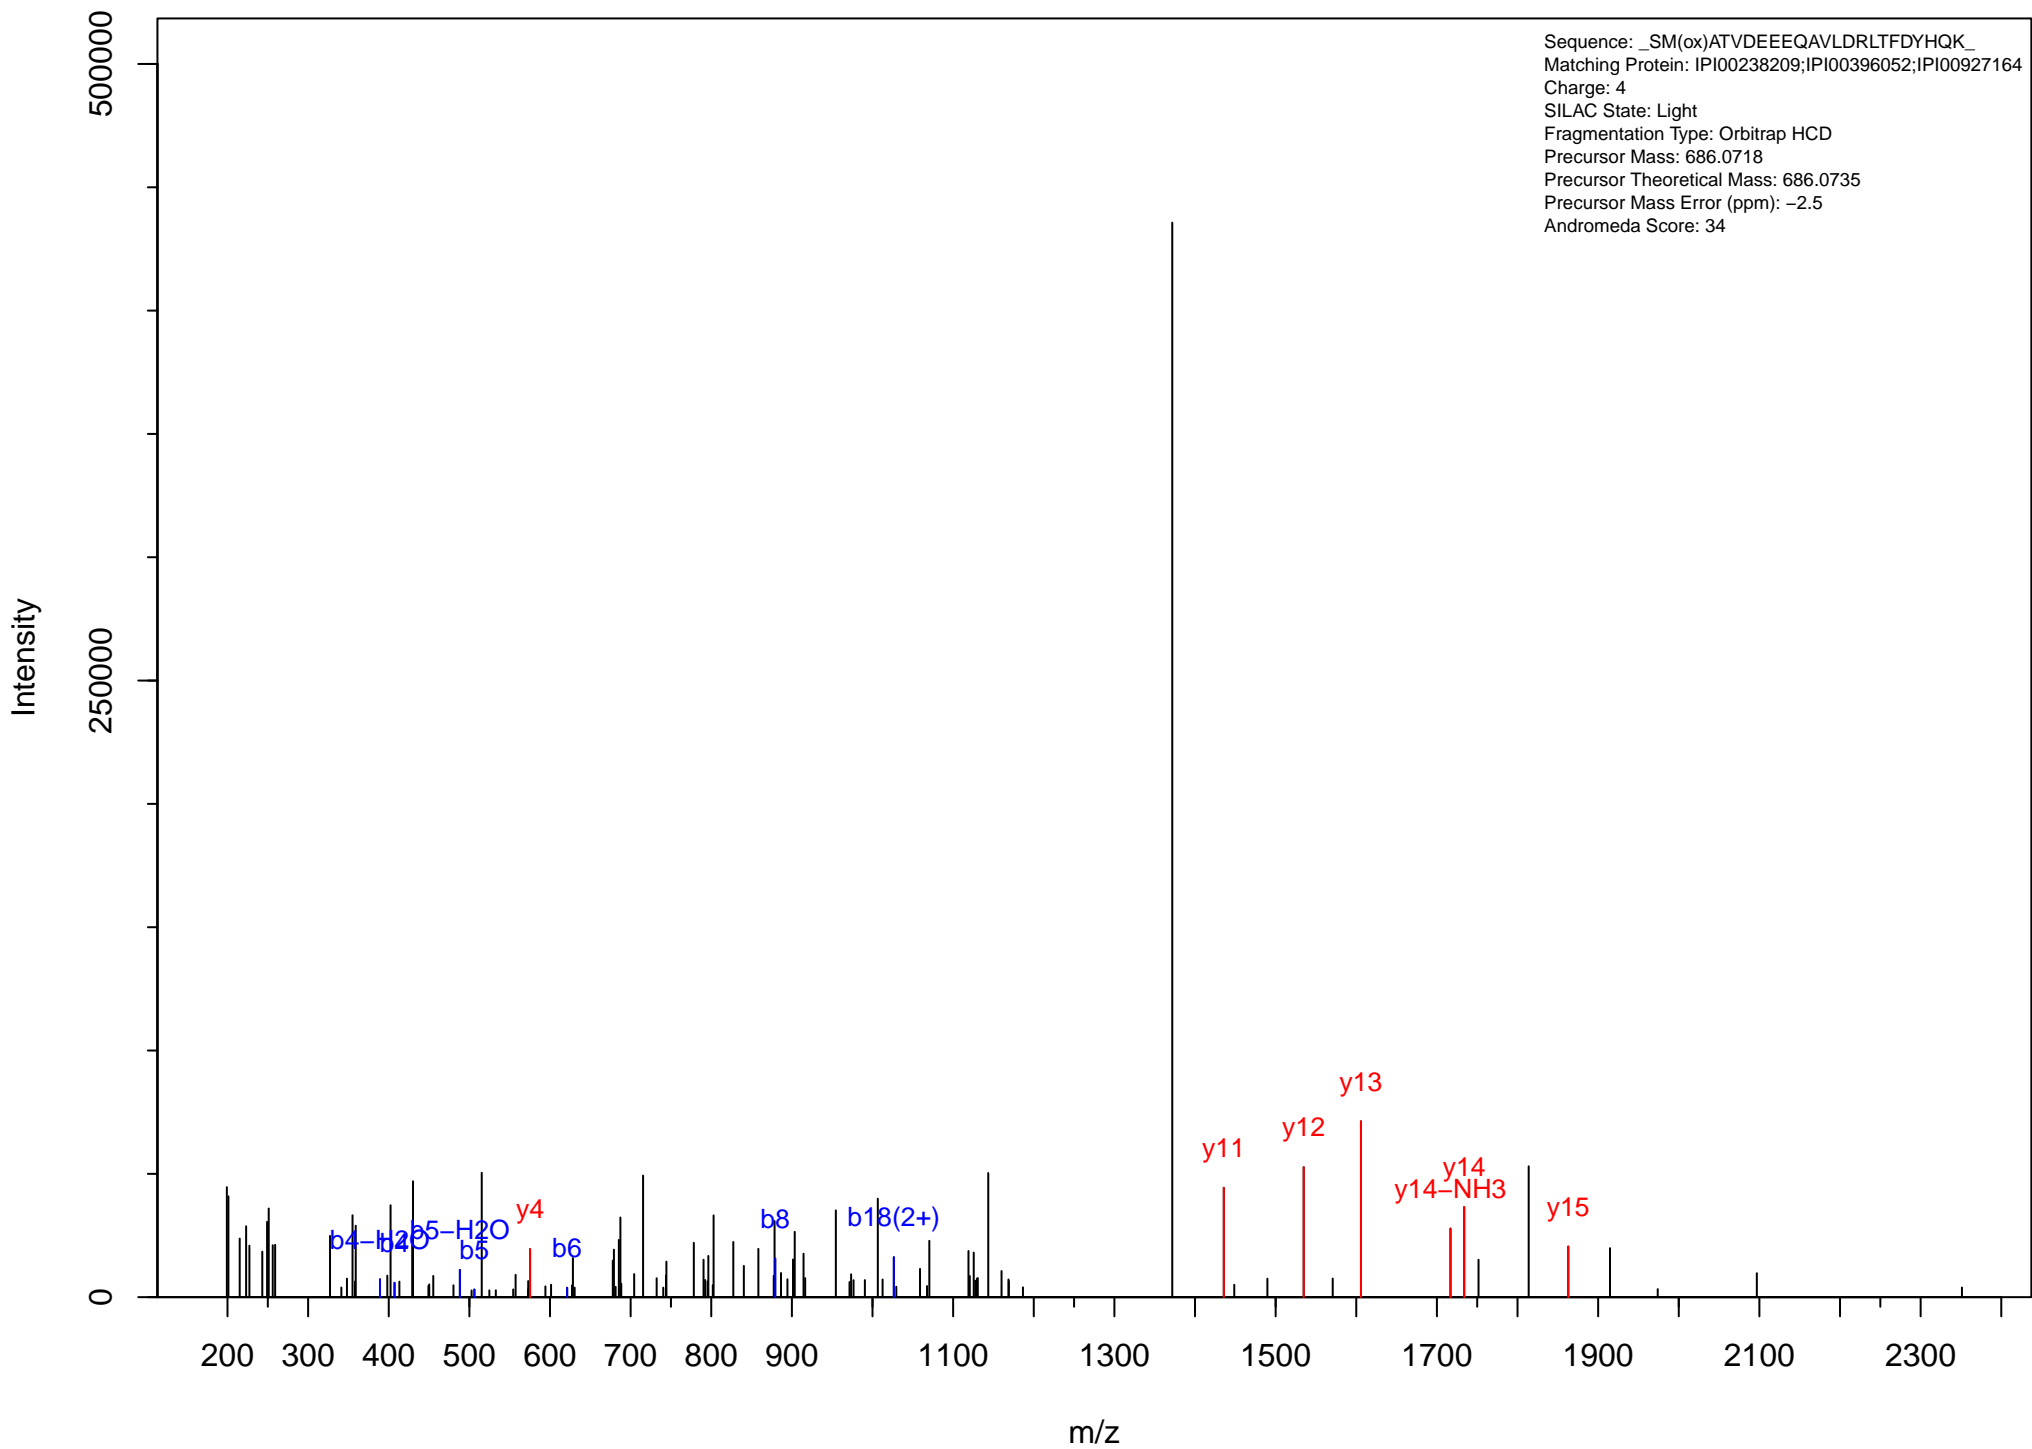

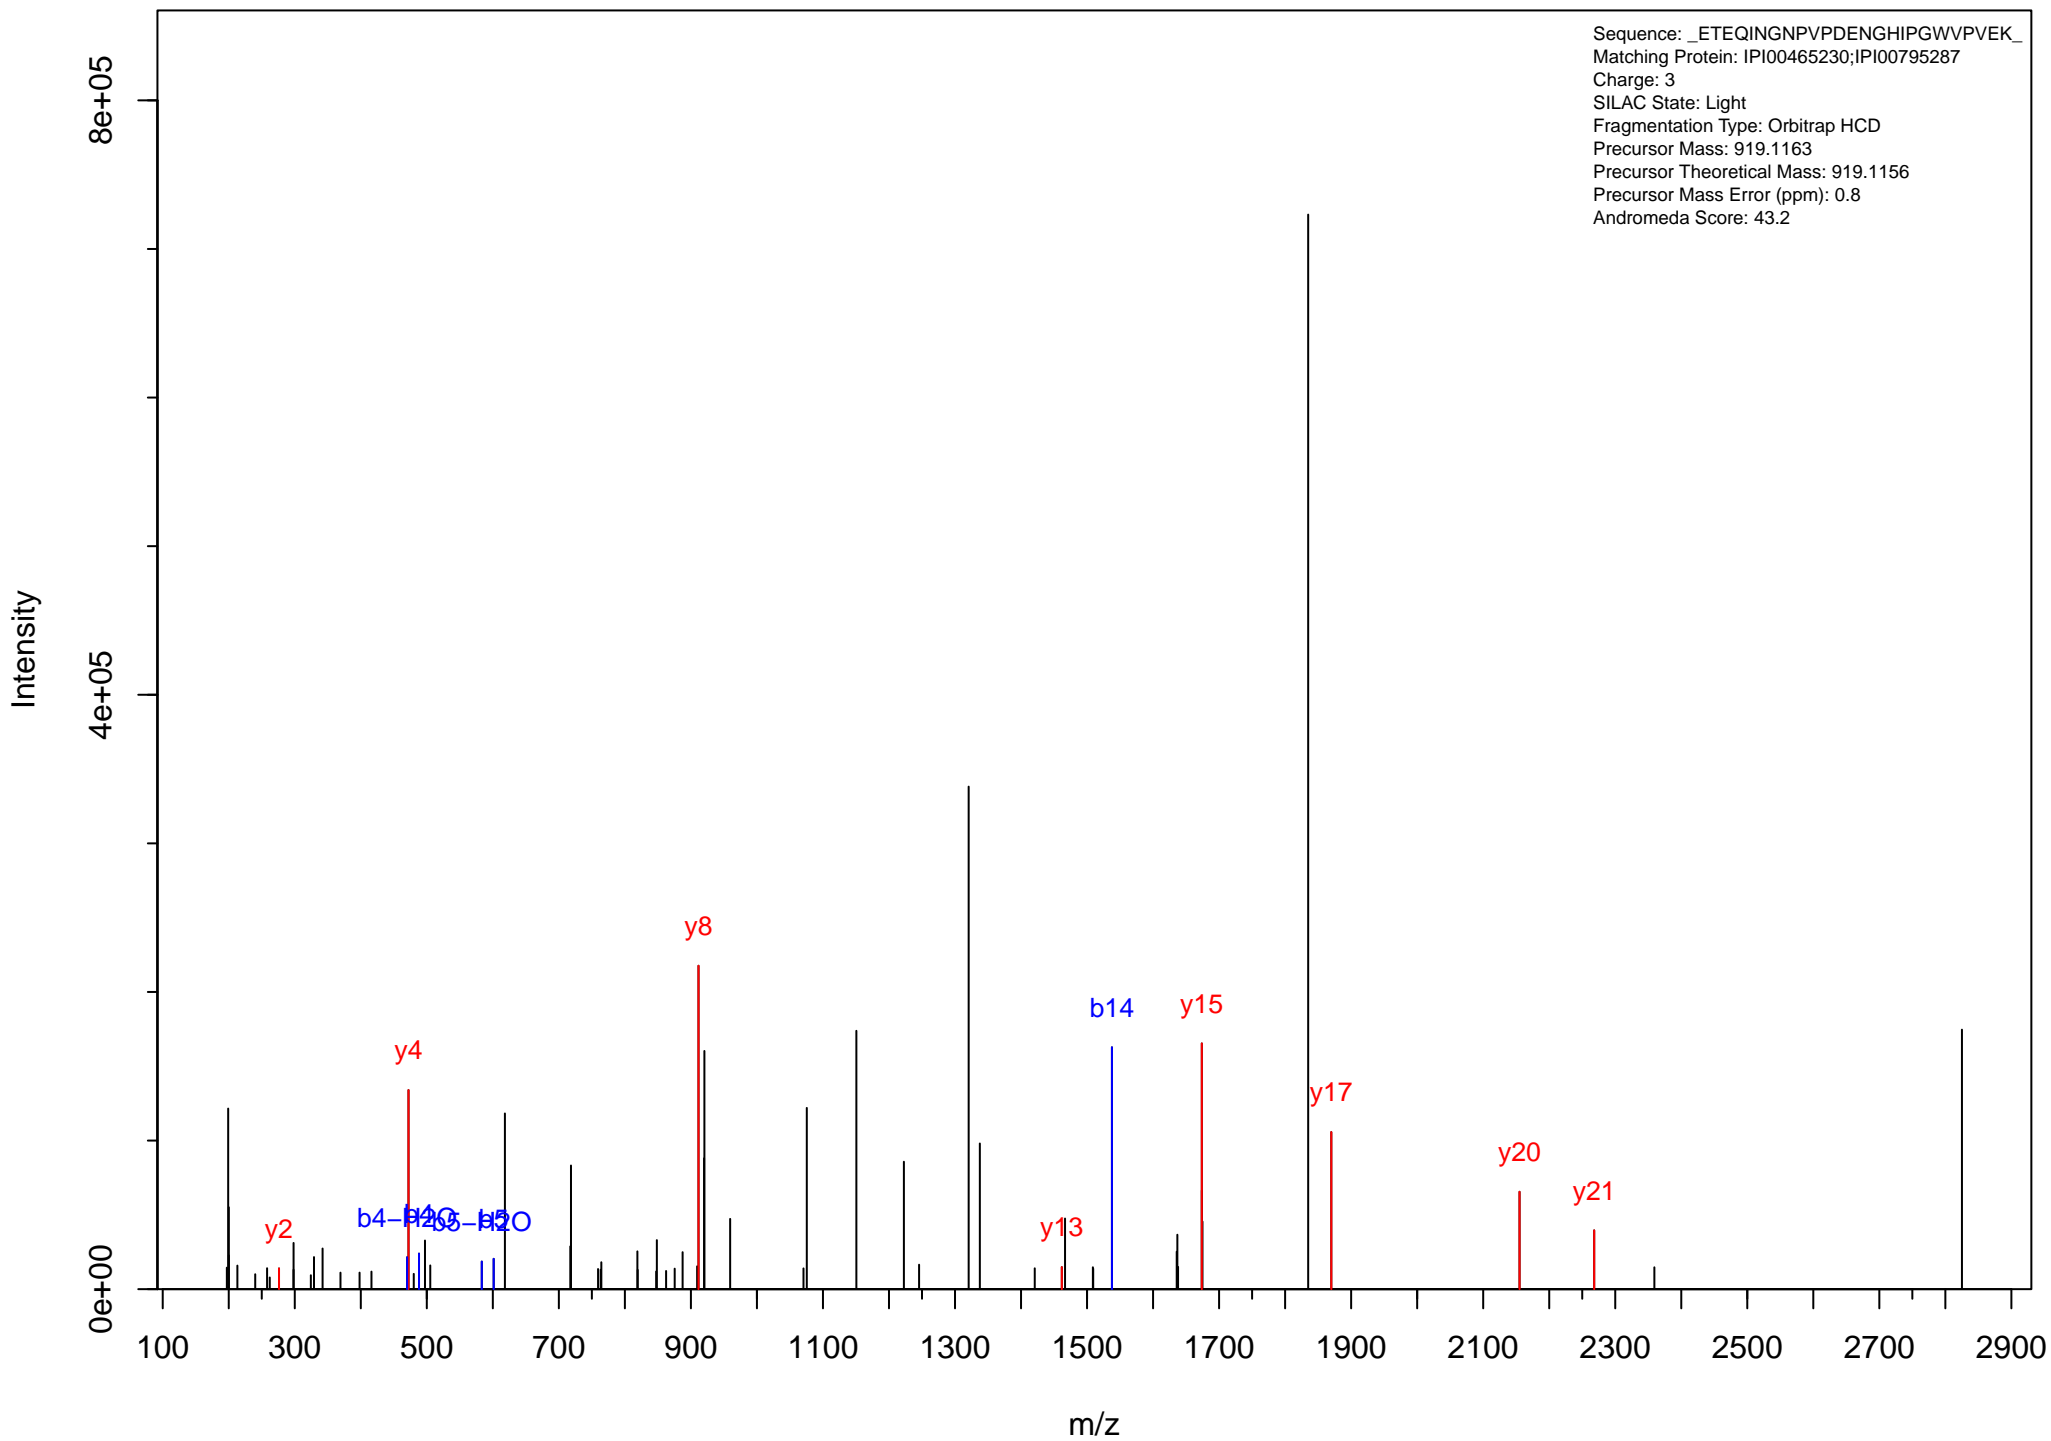

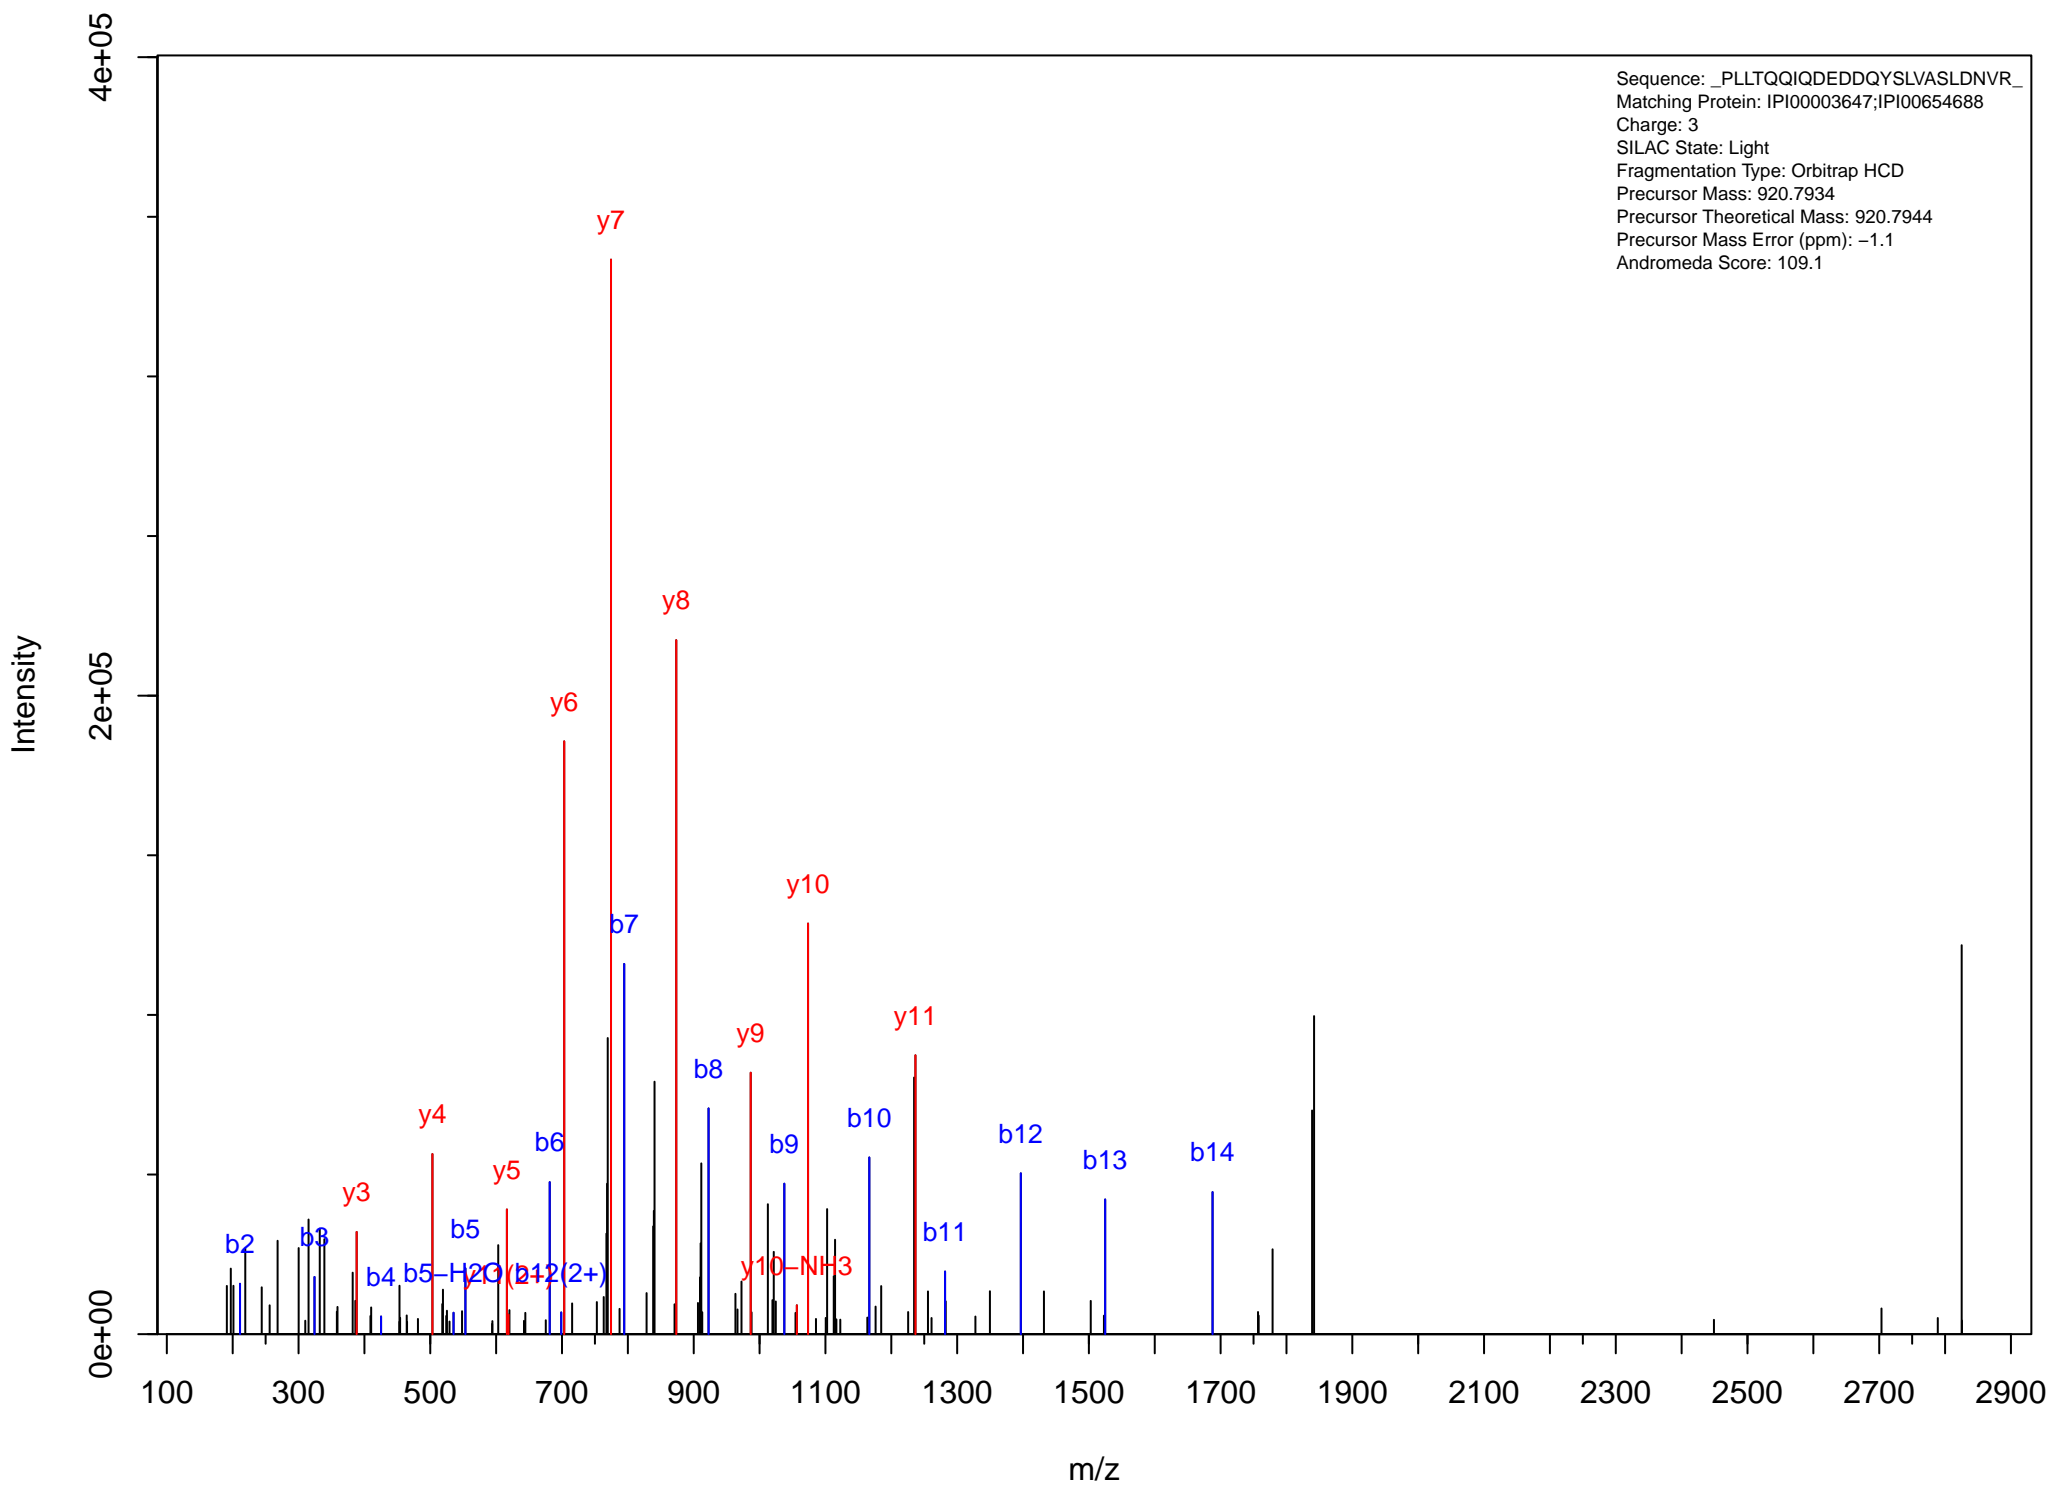

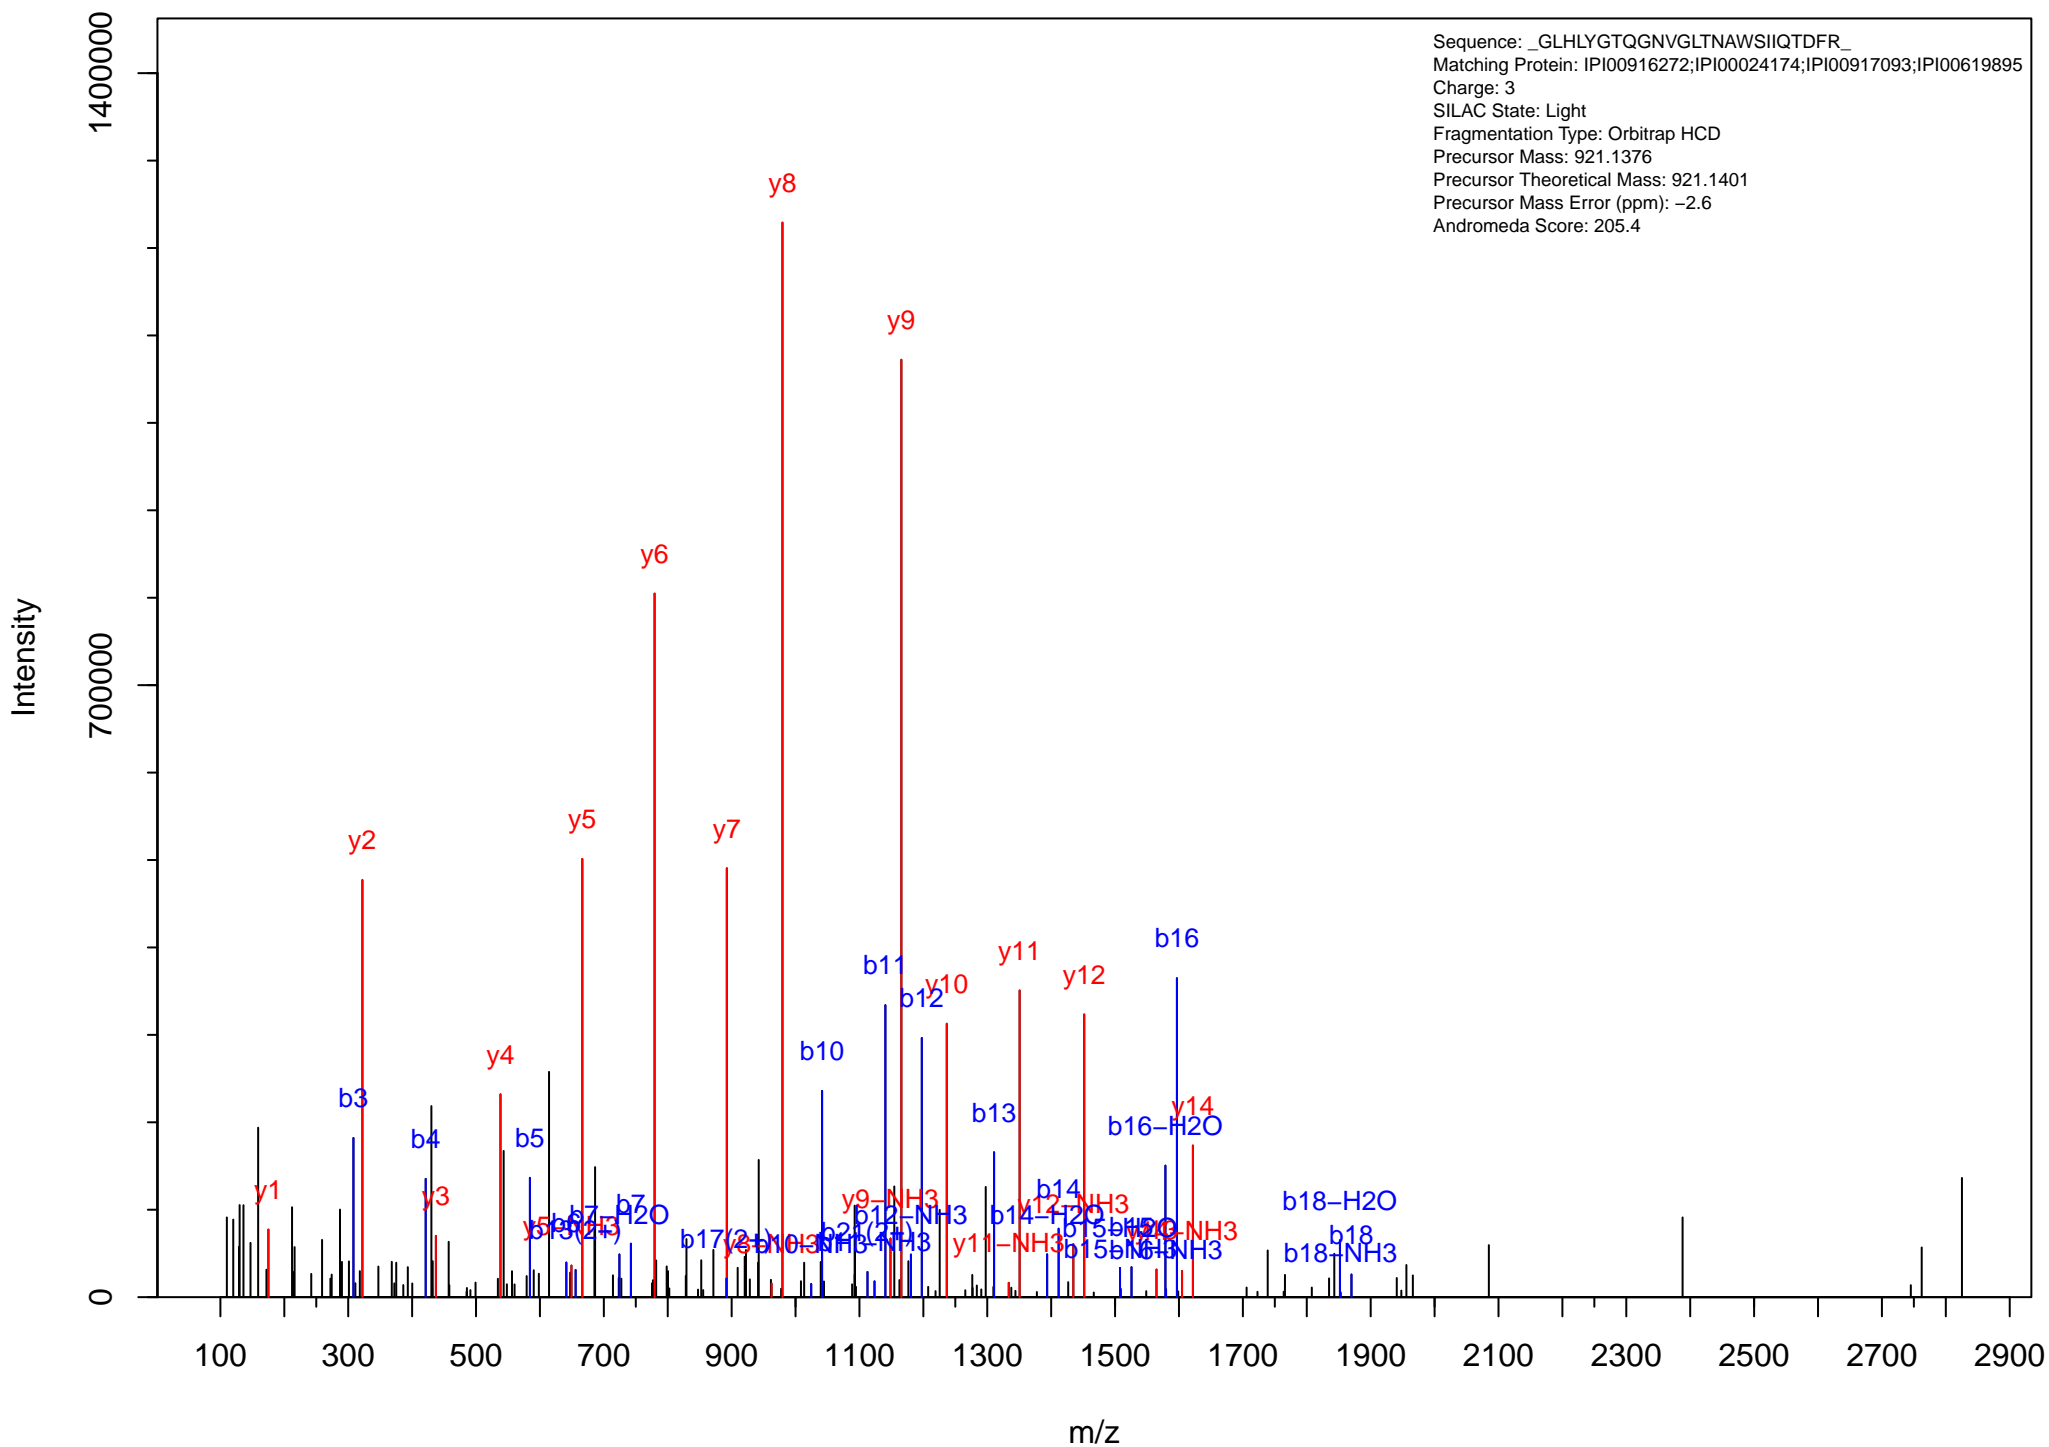

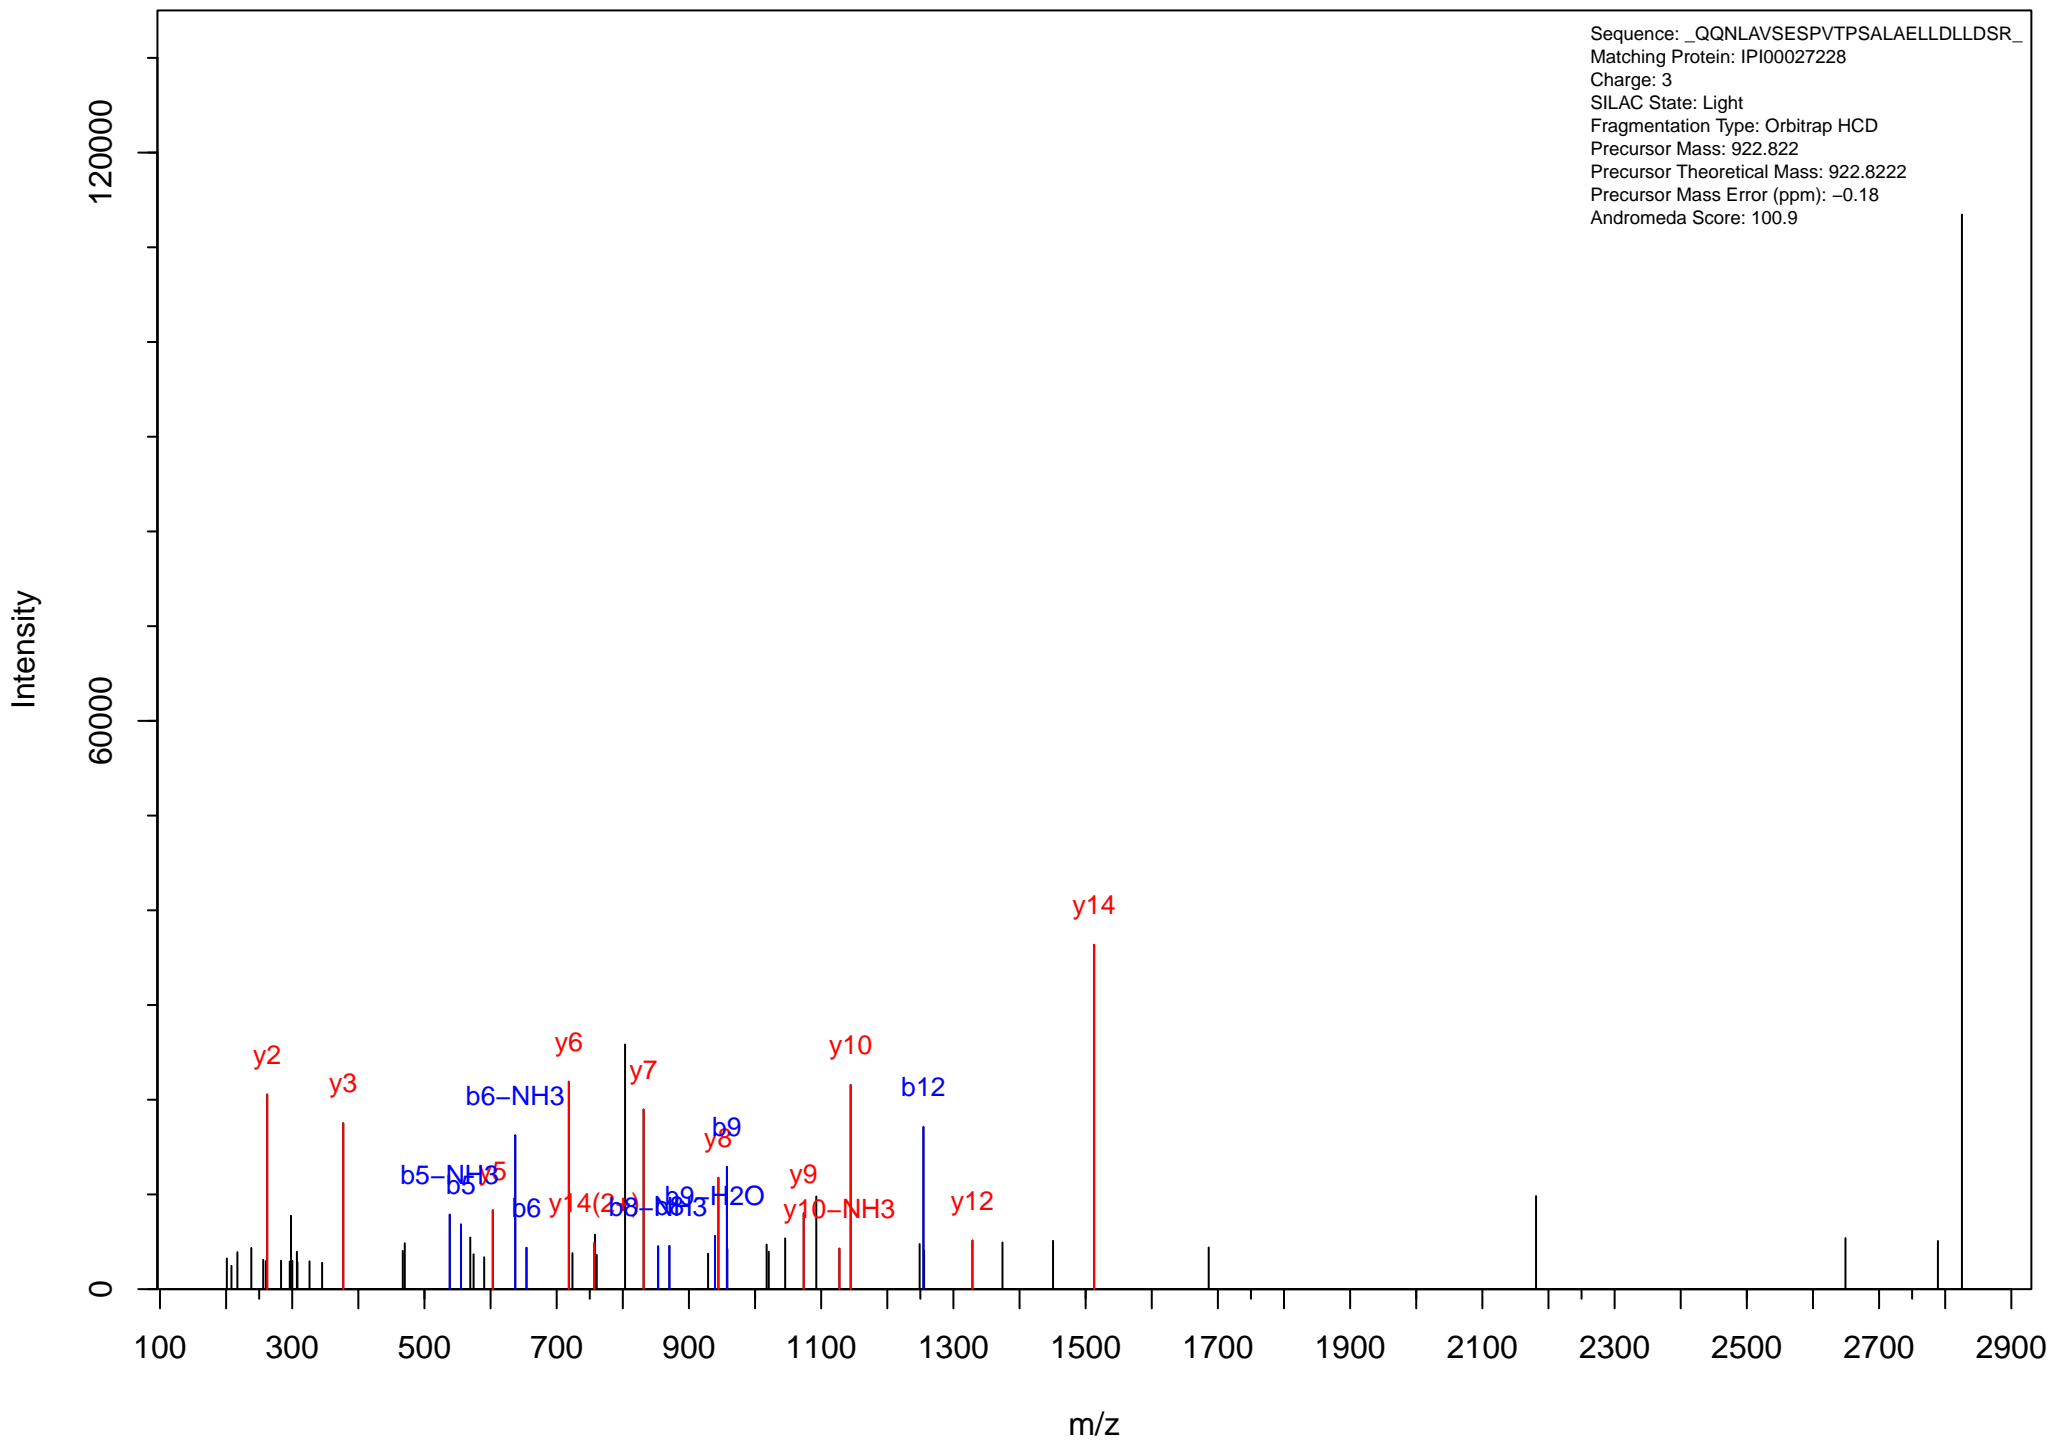

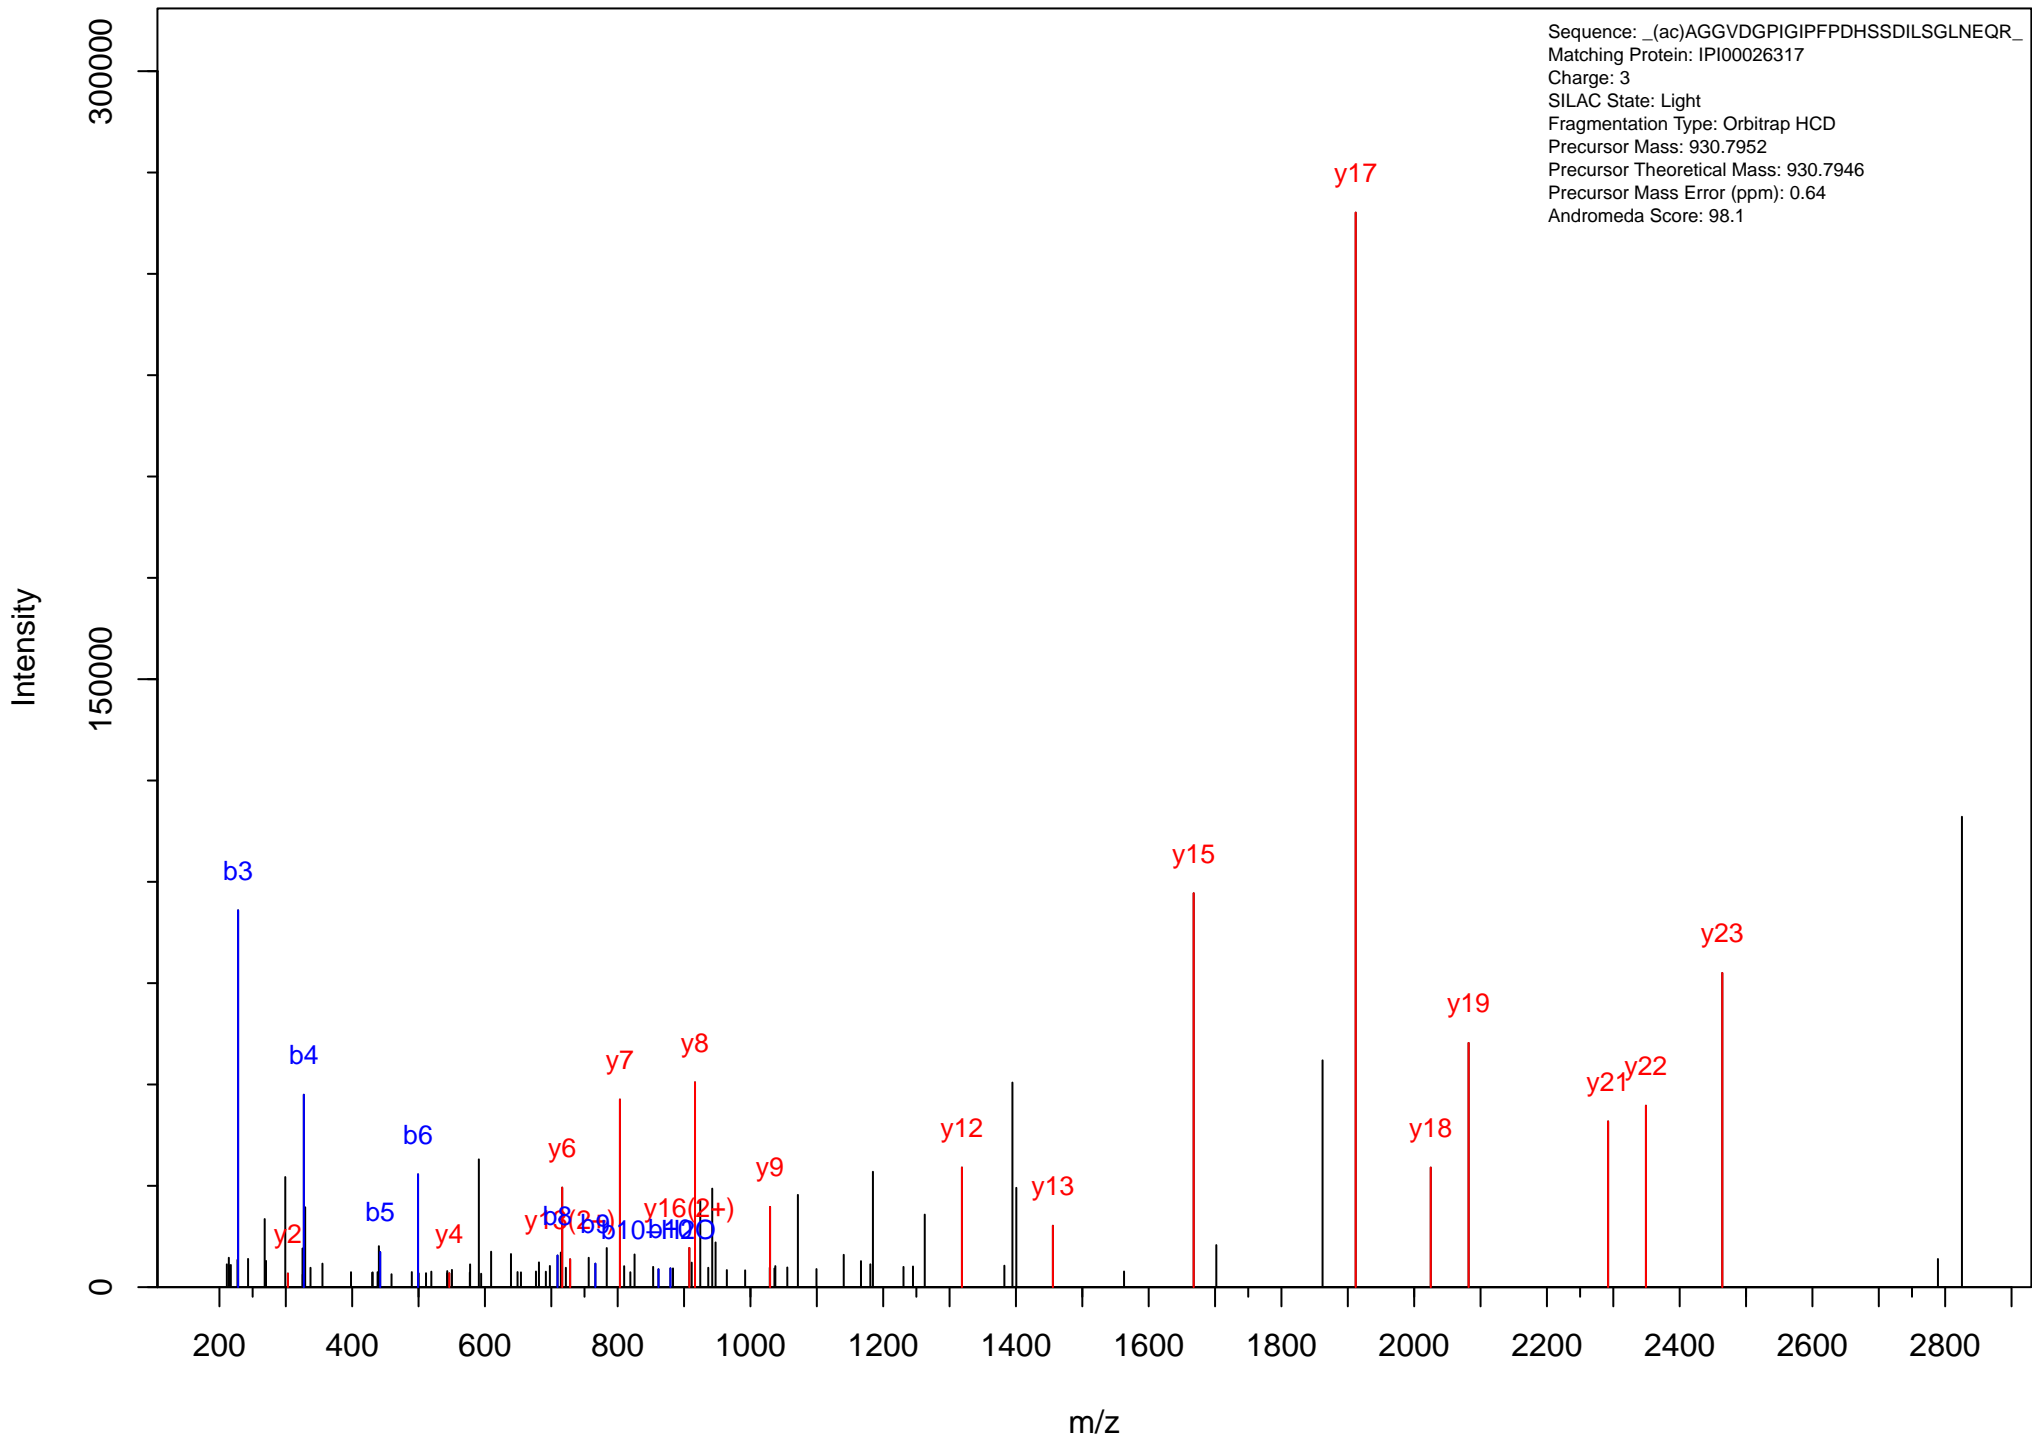

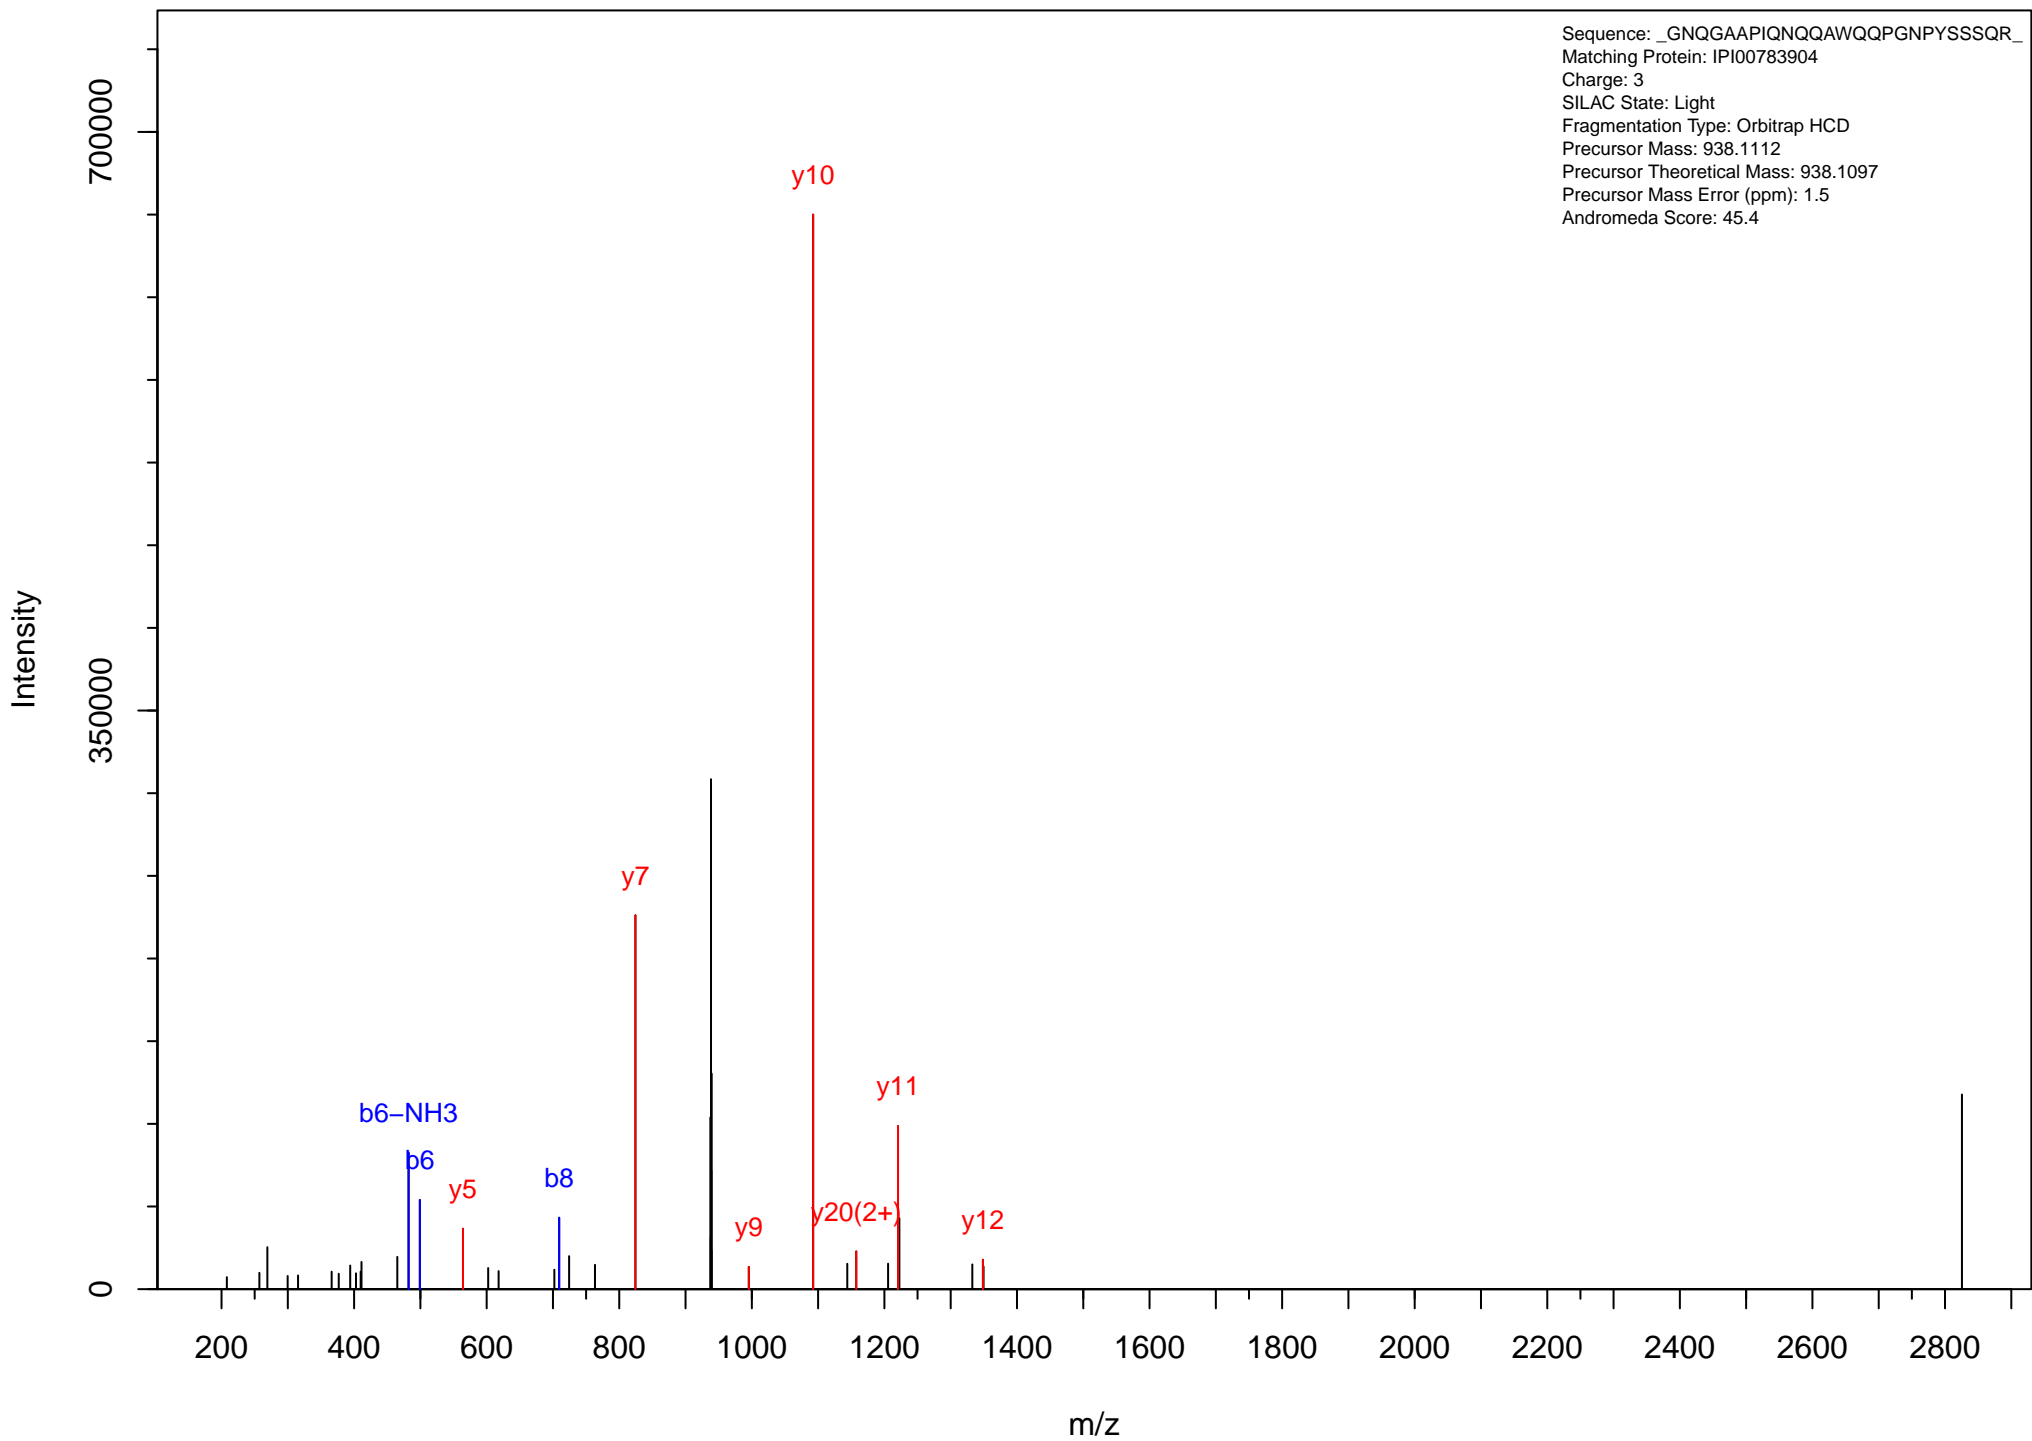

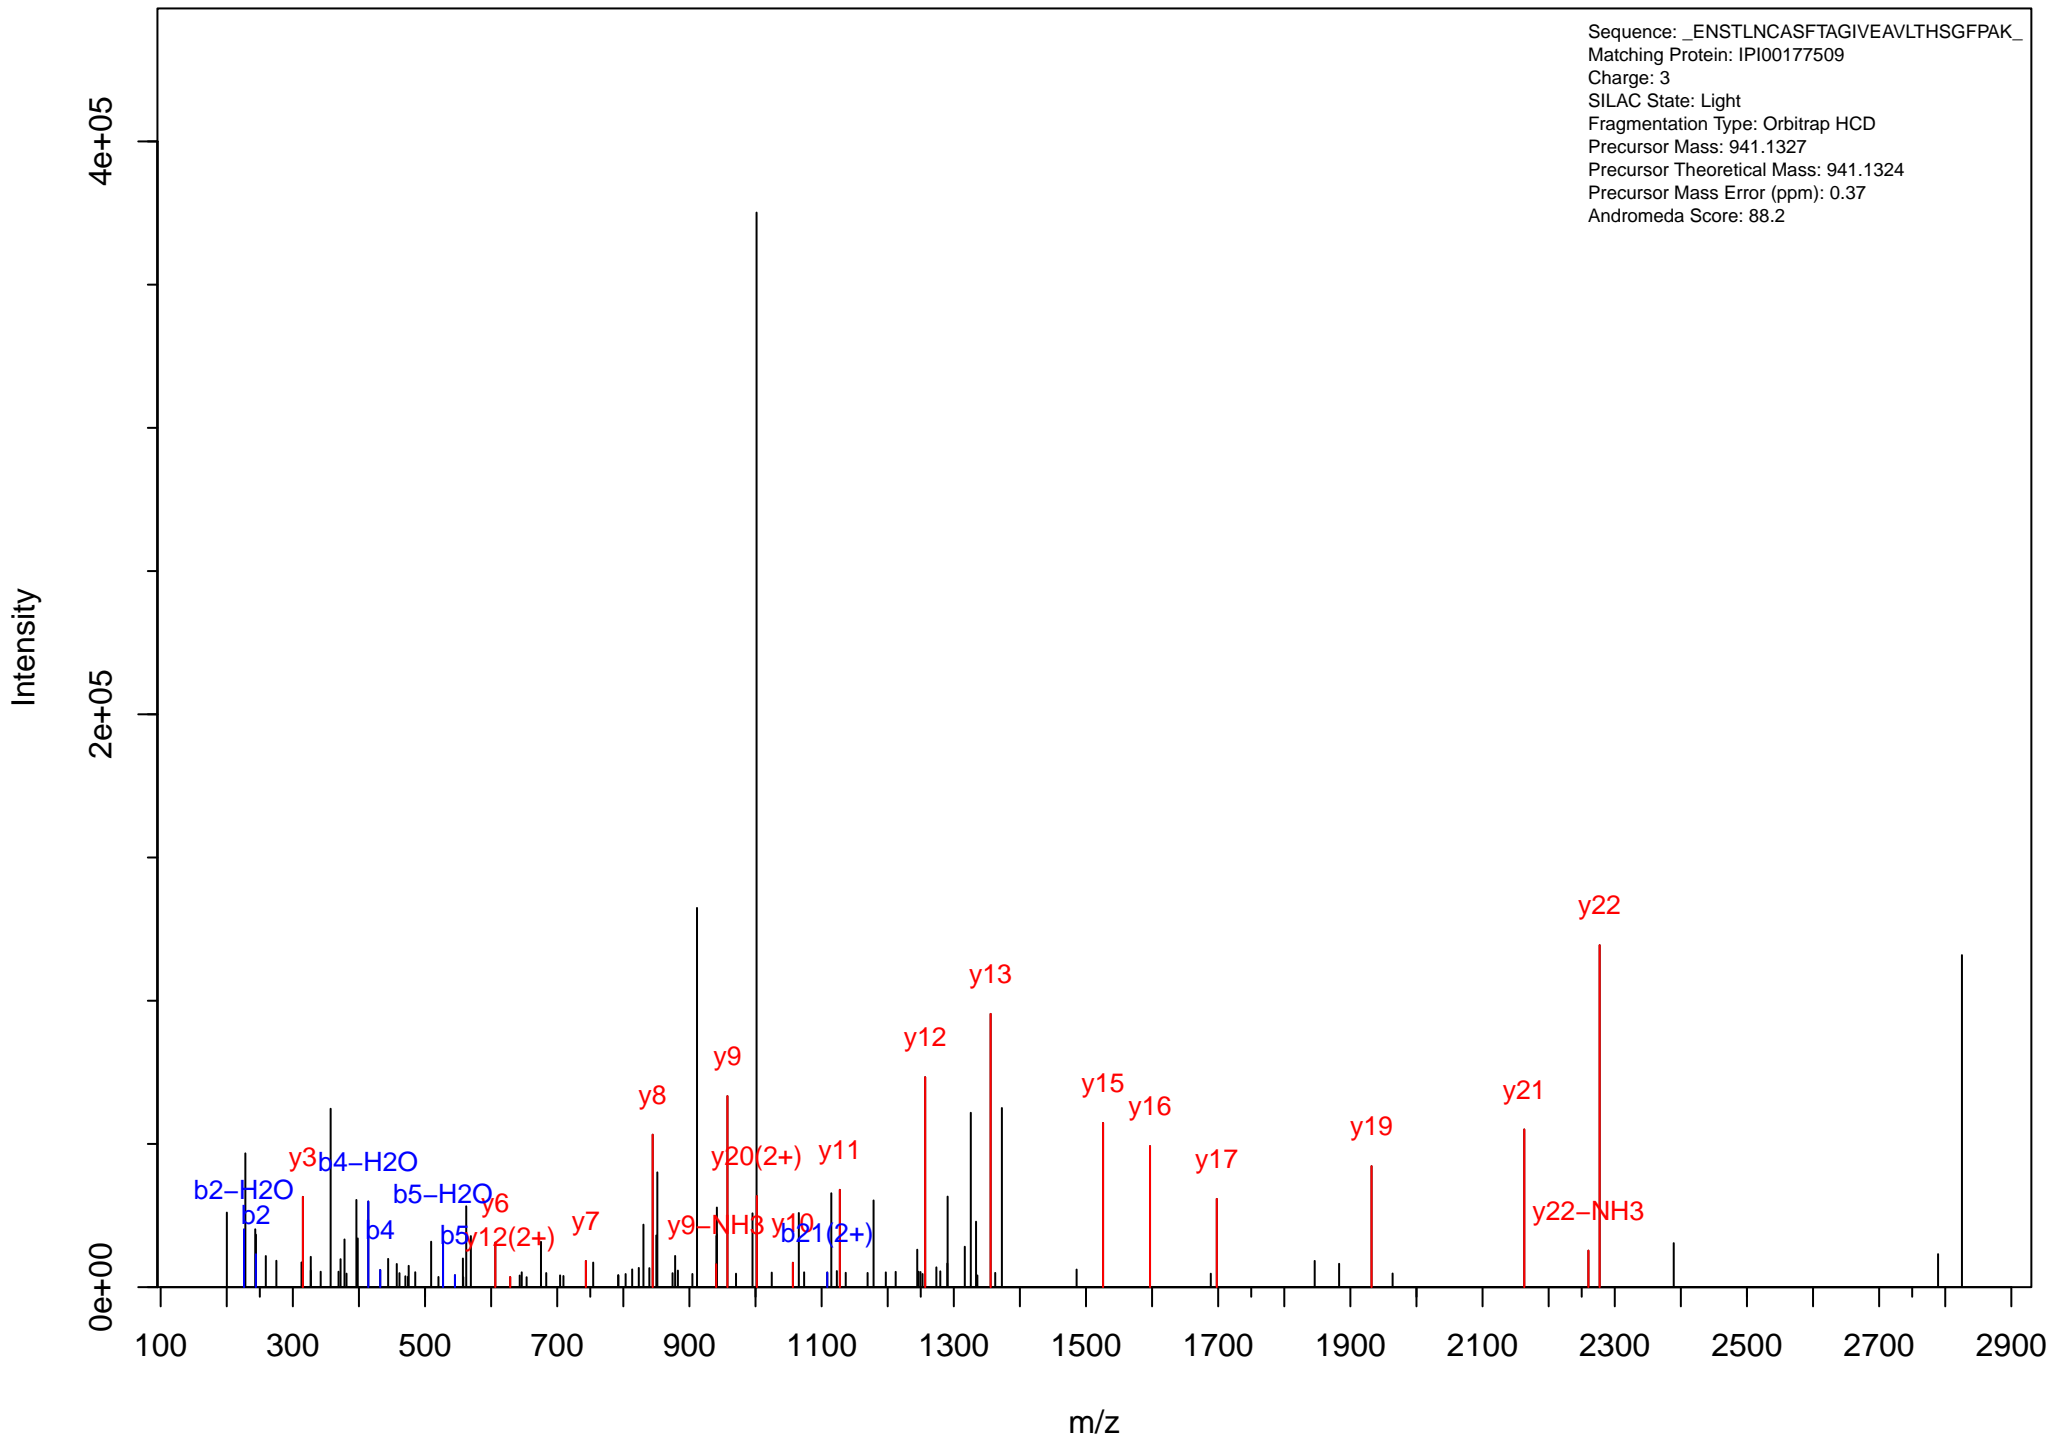

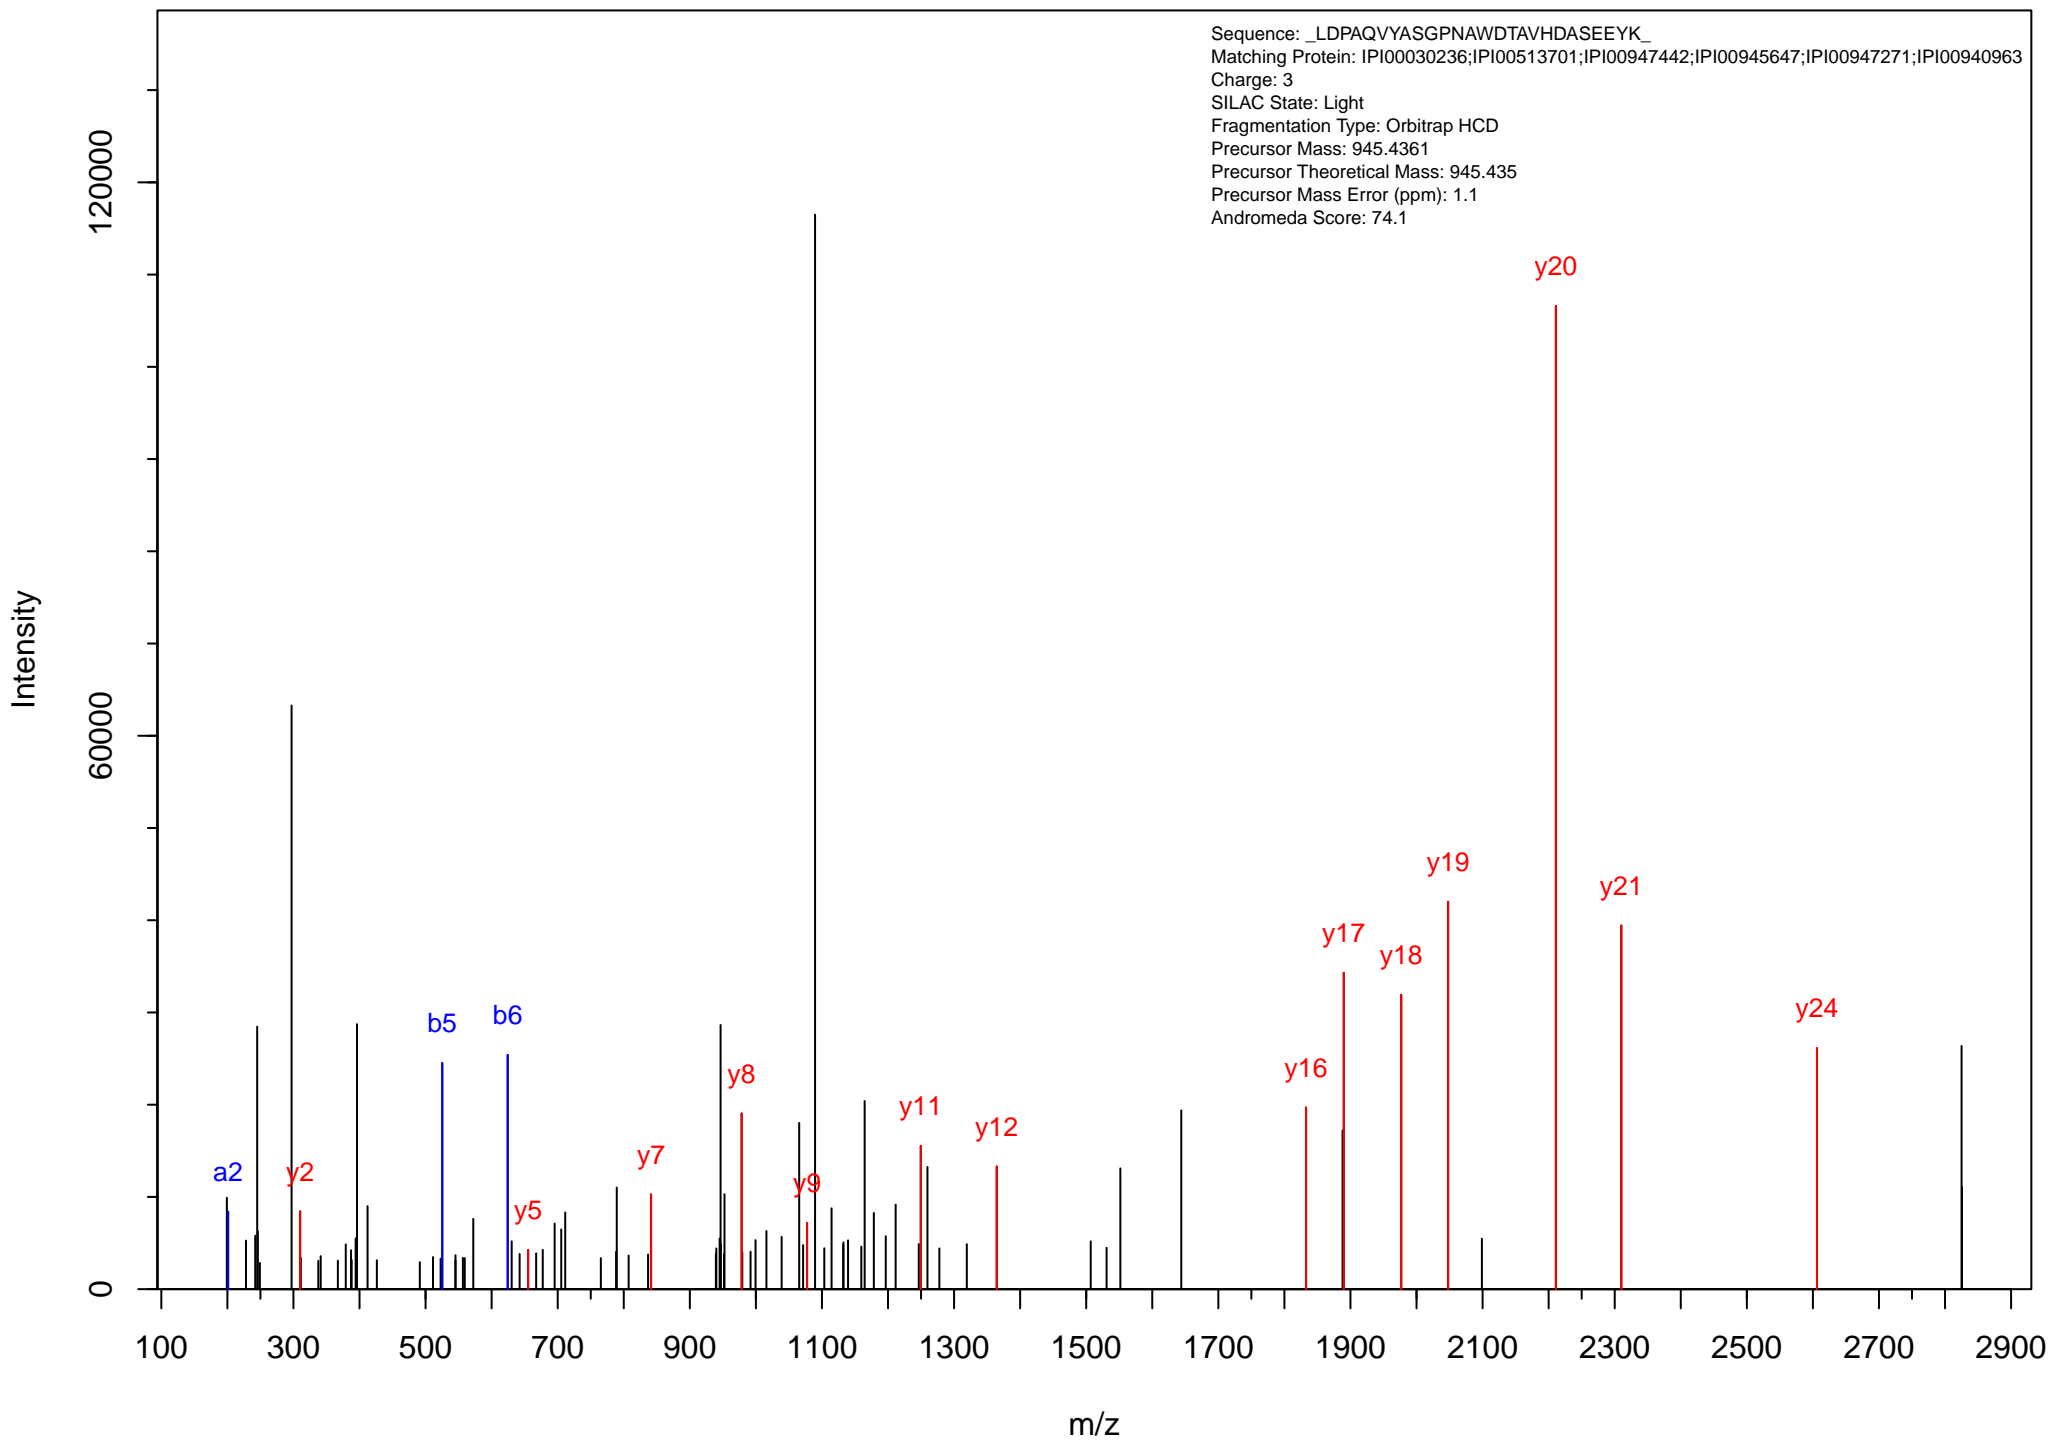

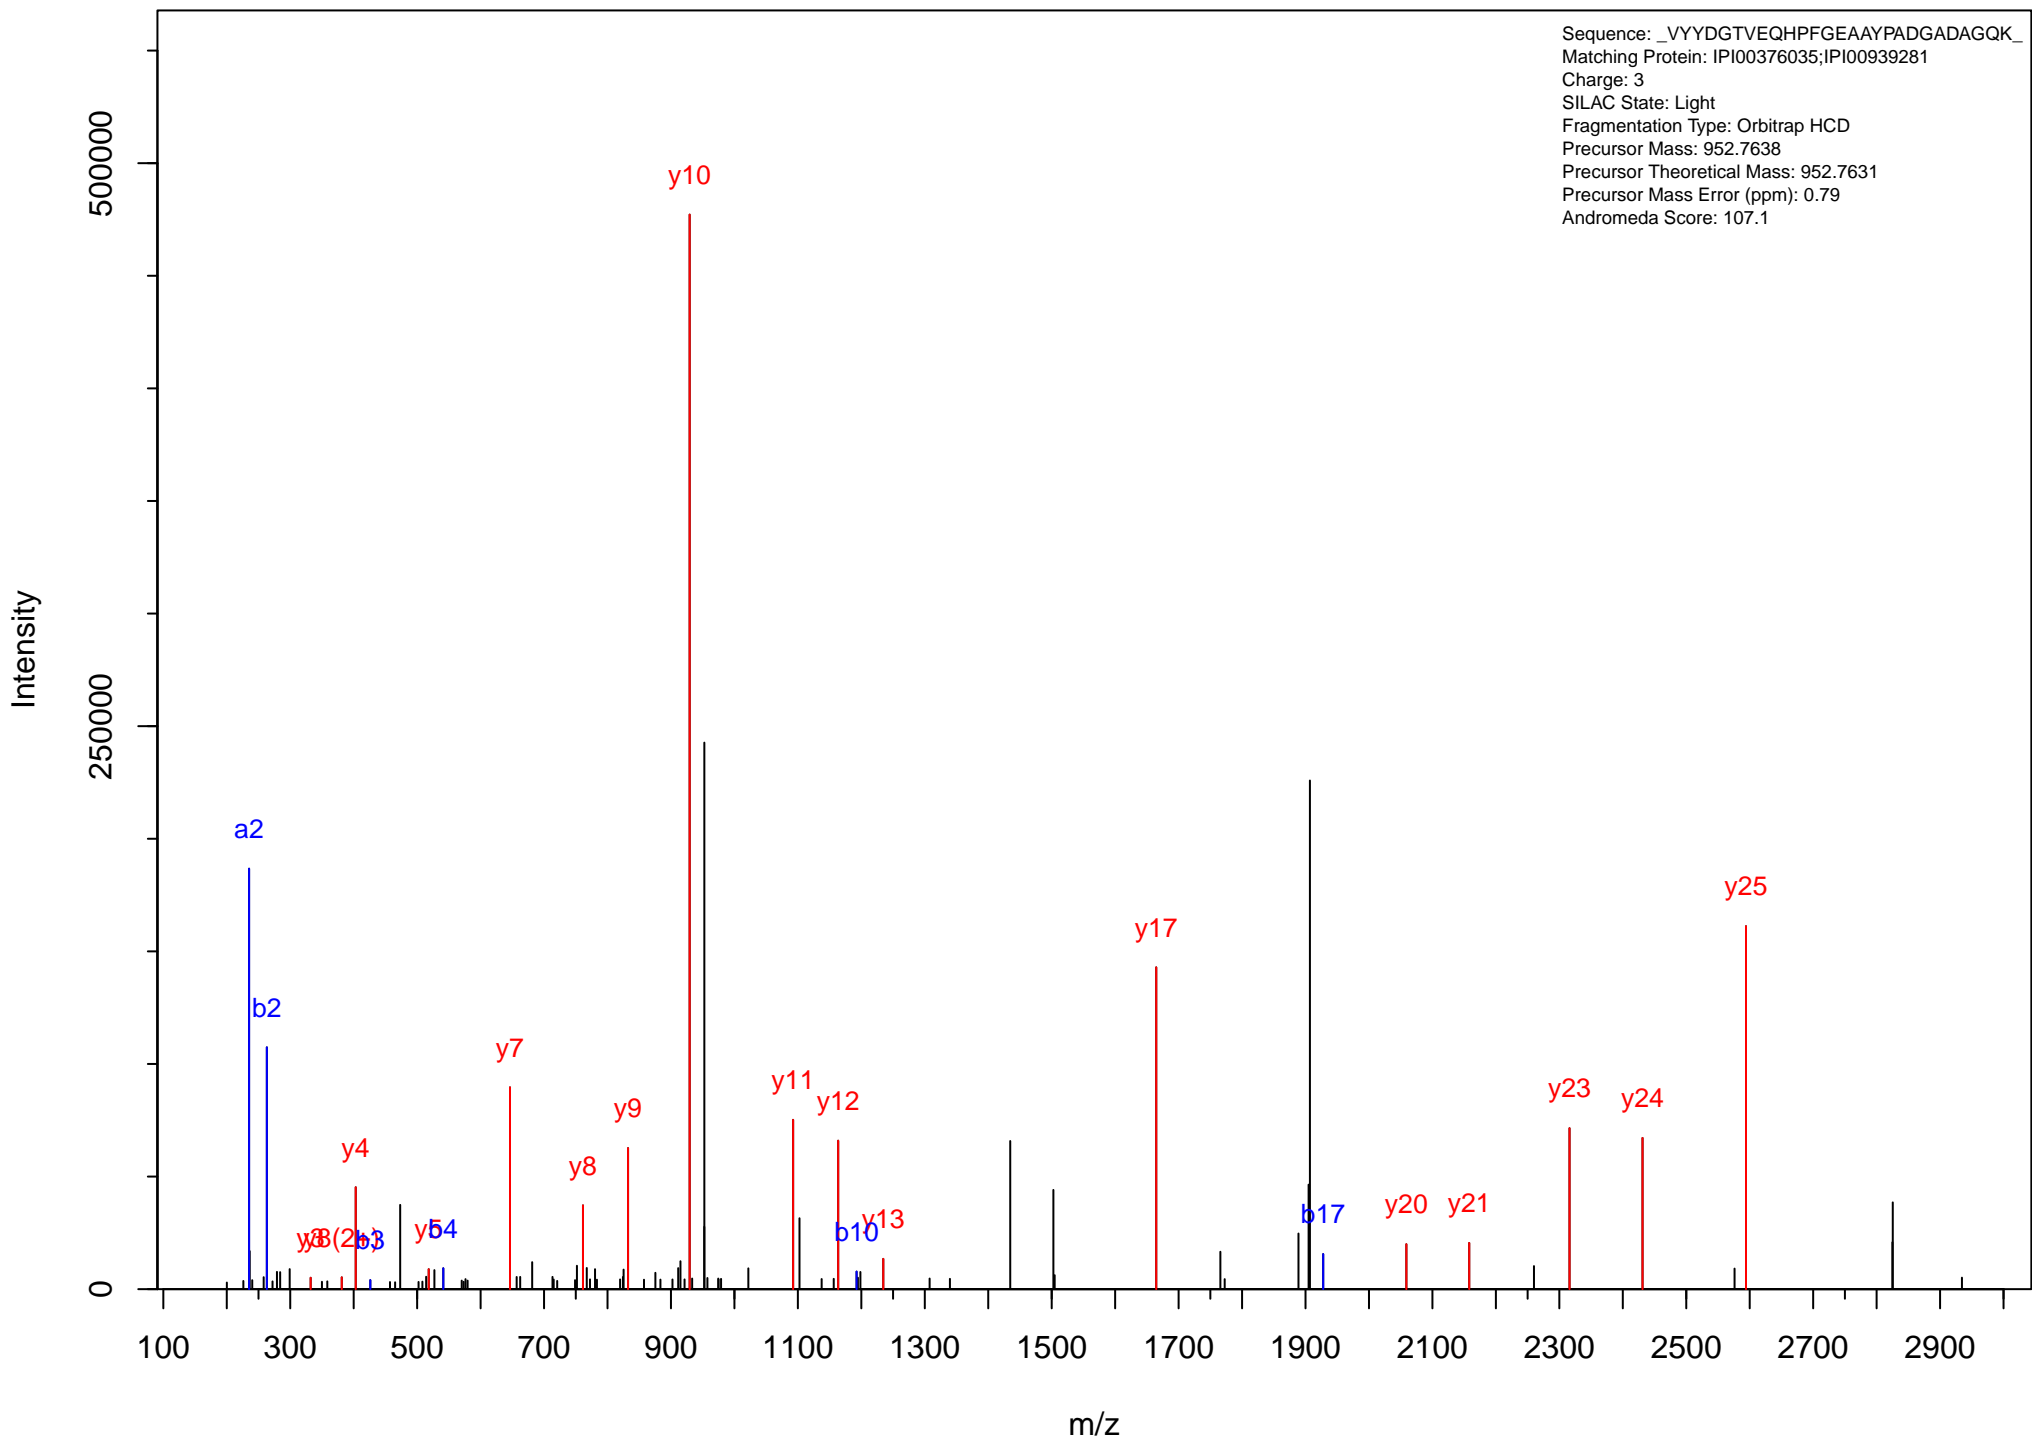

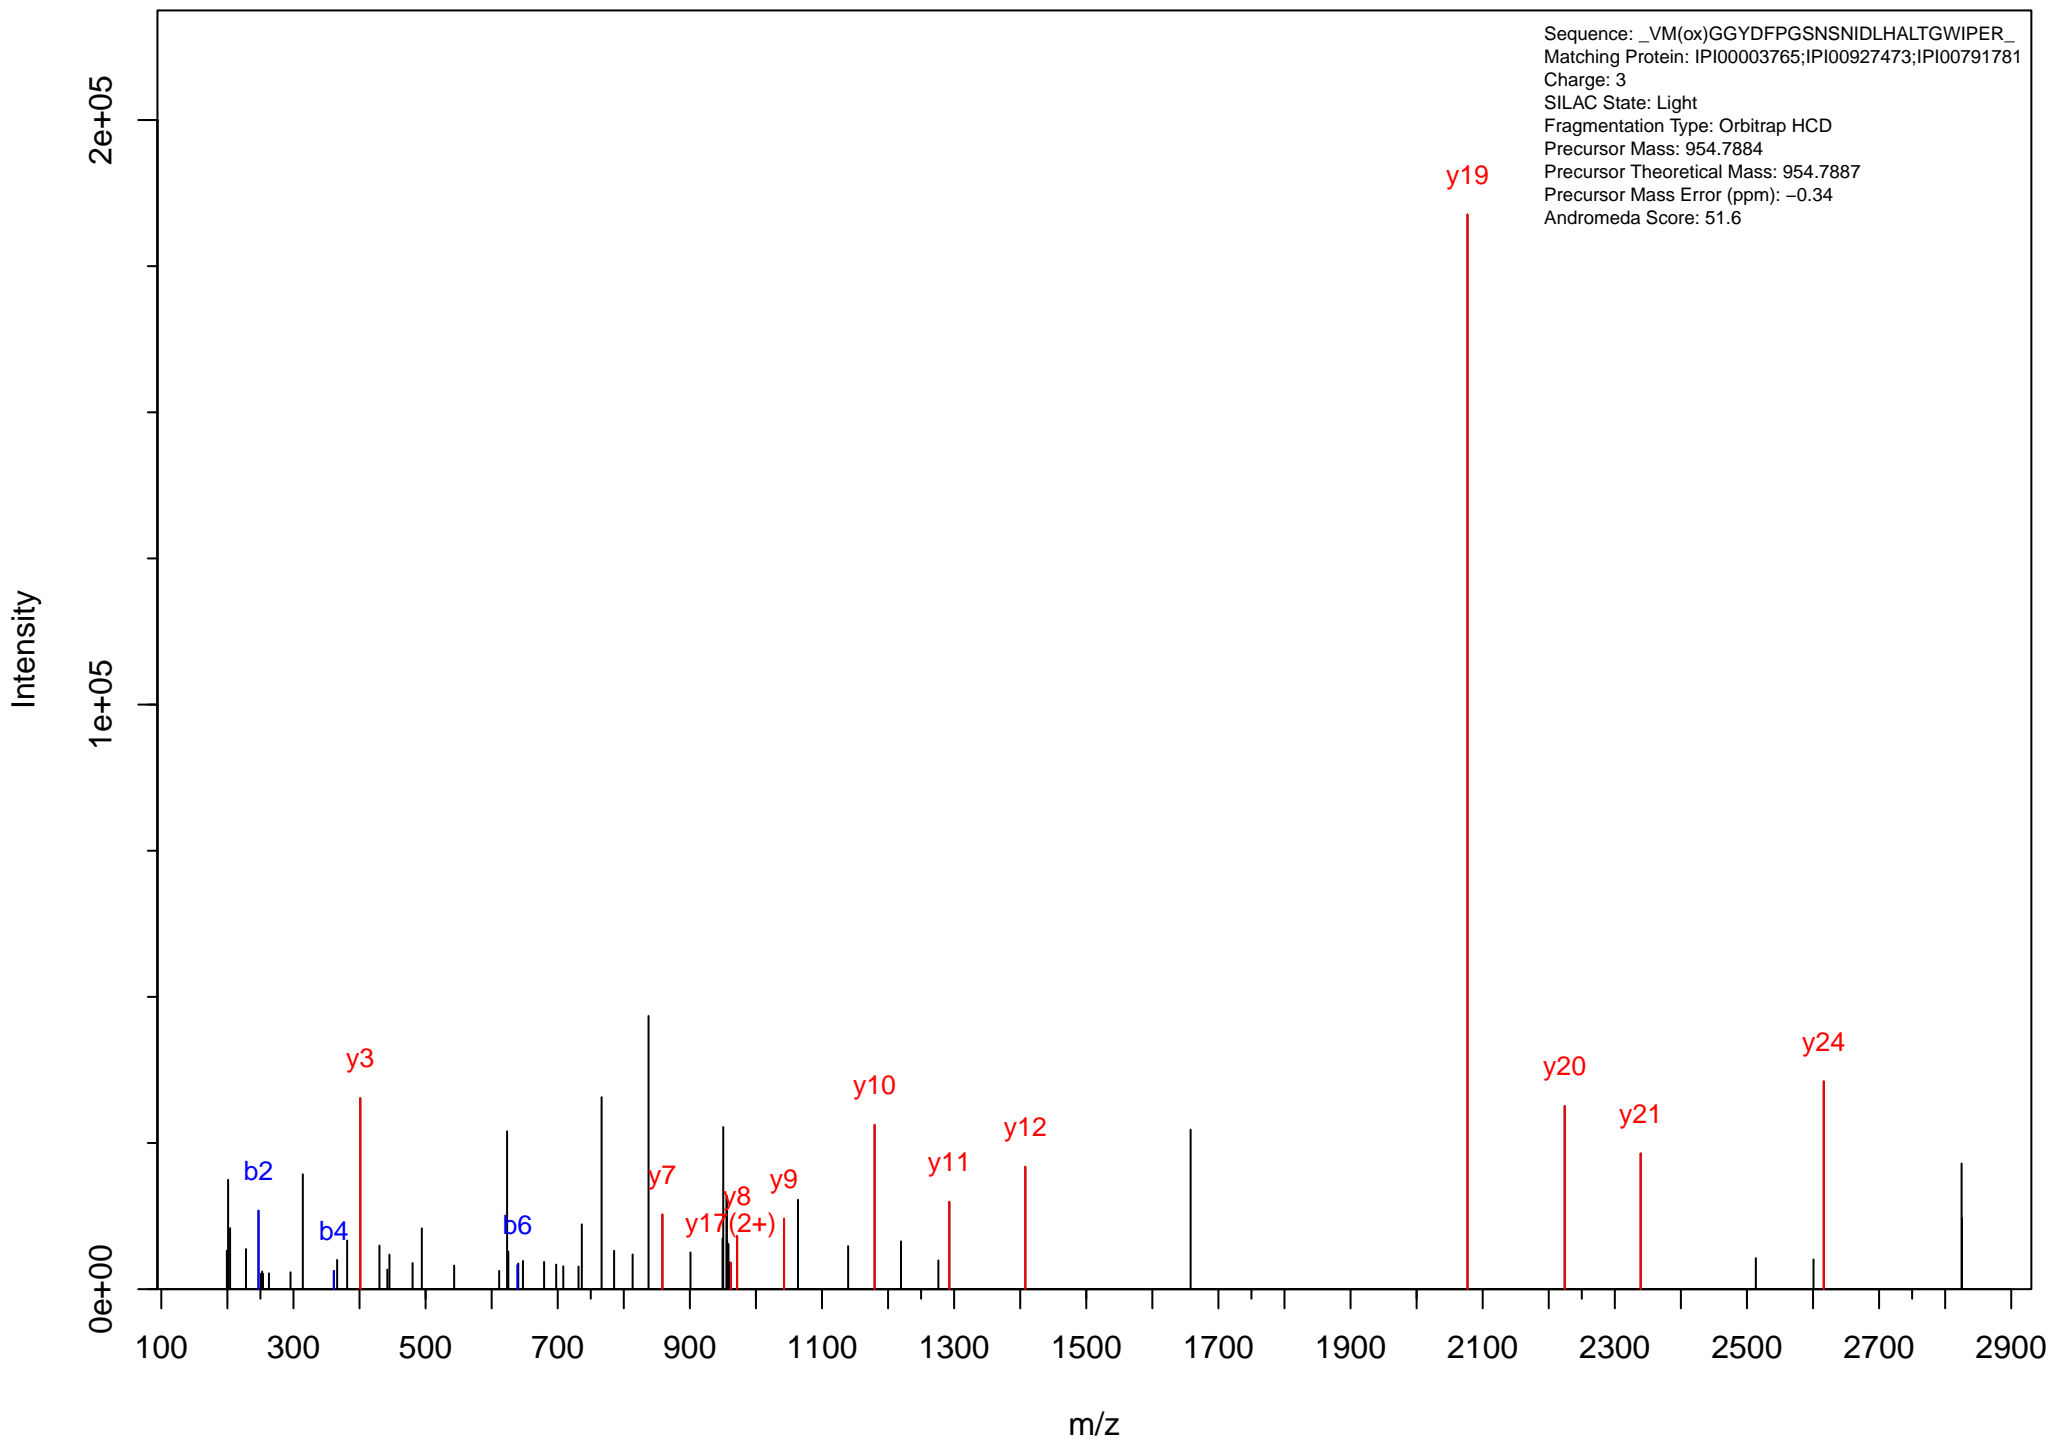

Intensity

8e+05

4e+05

0e+00

100 300 500 700 900 1100 1300 1500 1700 1900 2100 2300 2500 2700 2900

m/z

Sequence: \_VLETQDLNGDGLM(ox)TPAELINFPGVALR\_  
Matching Protein: IPI00892572;IPI00903089;IPI00337548;IPI00910562  
Charge: 3  
SILAC State: Light  
Fragmentation Type: Orbitrap HCD  
Precursor Mass: 967.1687  
Precursor Theoretical Mass: 967.1672  
Precursor Mass Error (ppm): 1.6  
Andromeda Score: 56.9

b2

y2

b3

y3

y5

y6

y7

y8

y9

y10

y11

y12

y13

b1

b2

b3

b4

b5

b6

b7

b8

b9

b10

b11

b12

b13

b14

b15

b16

b17

b18

b19

b20

b21

b22

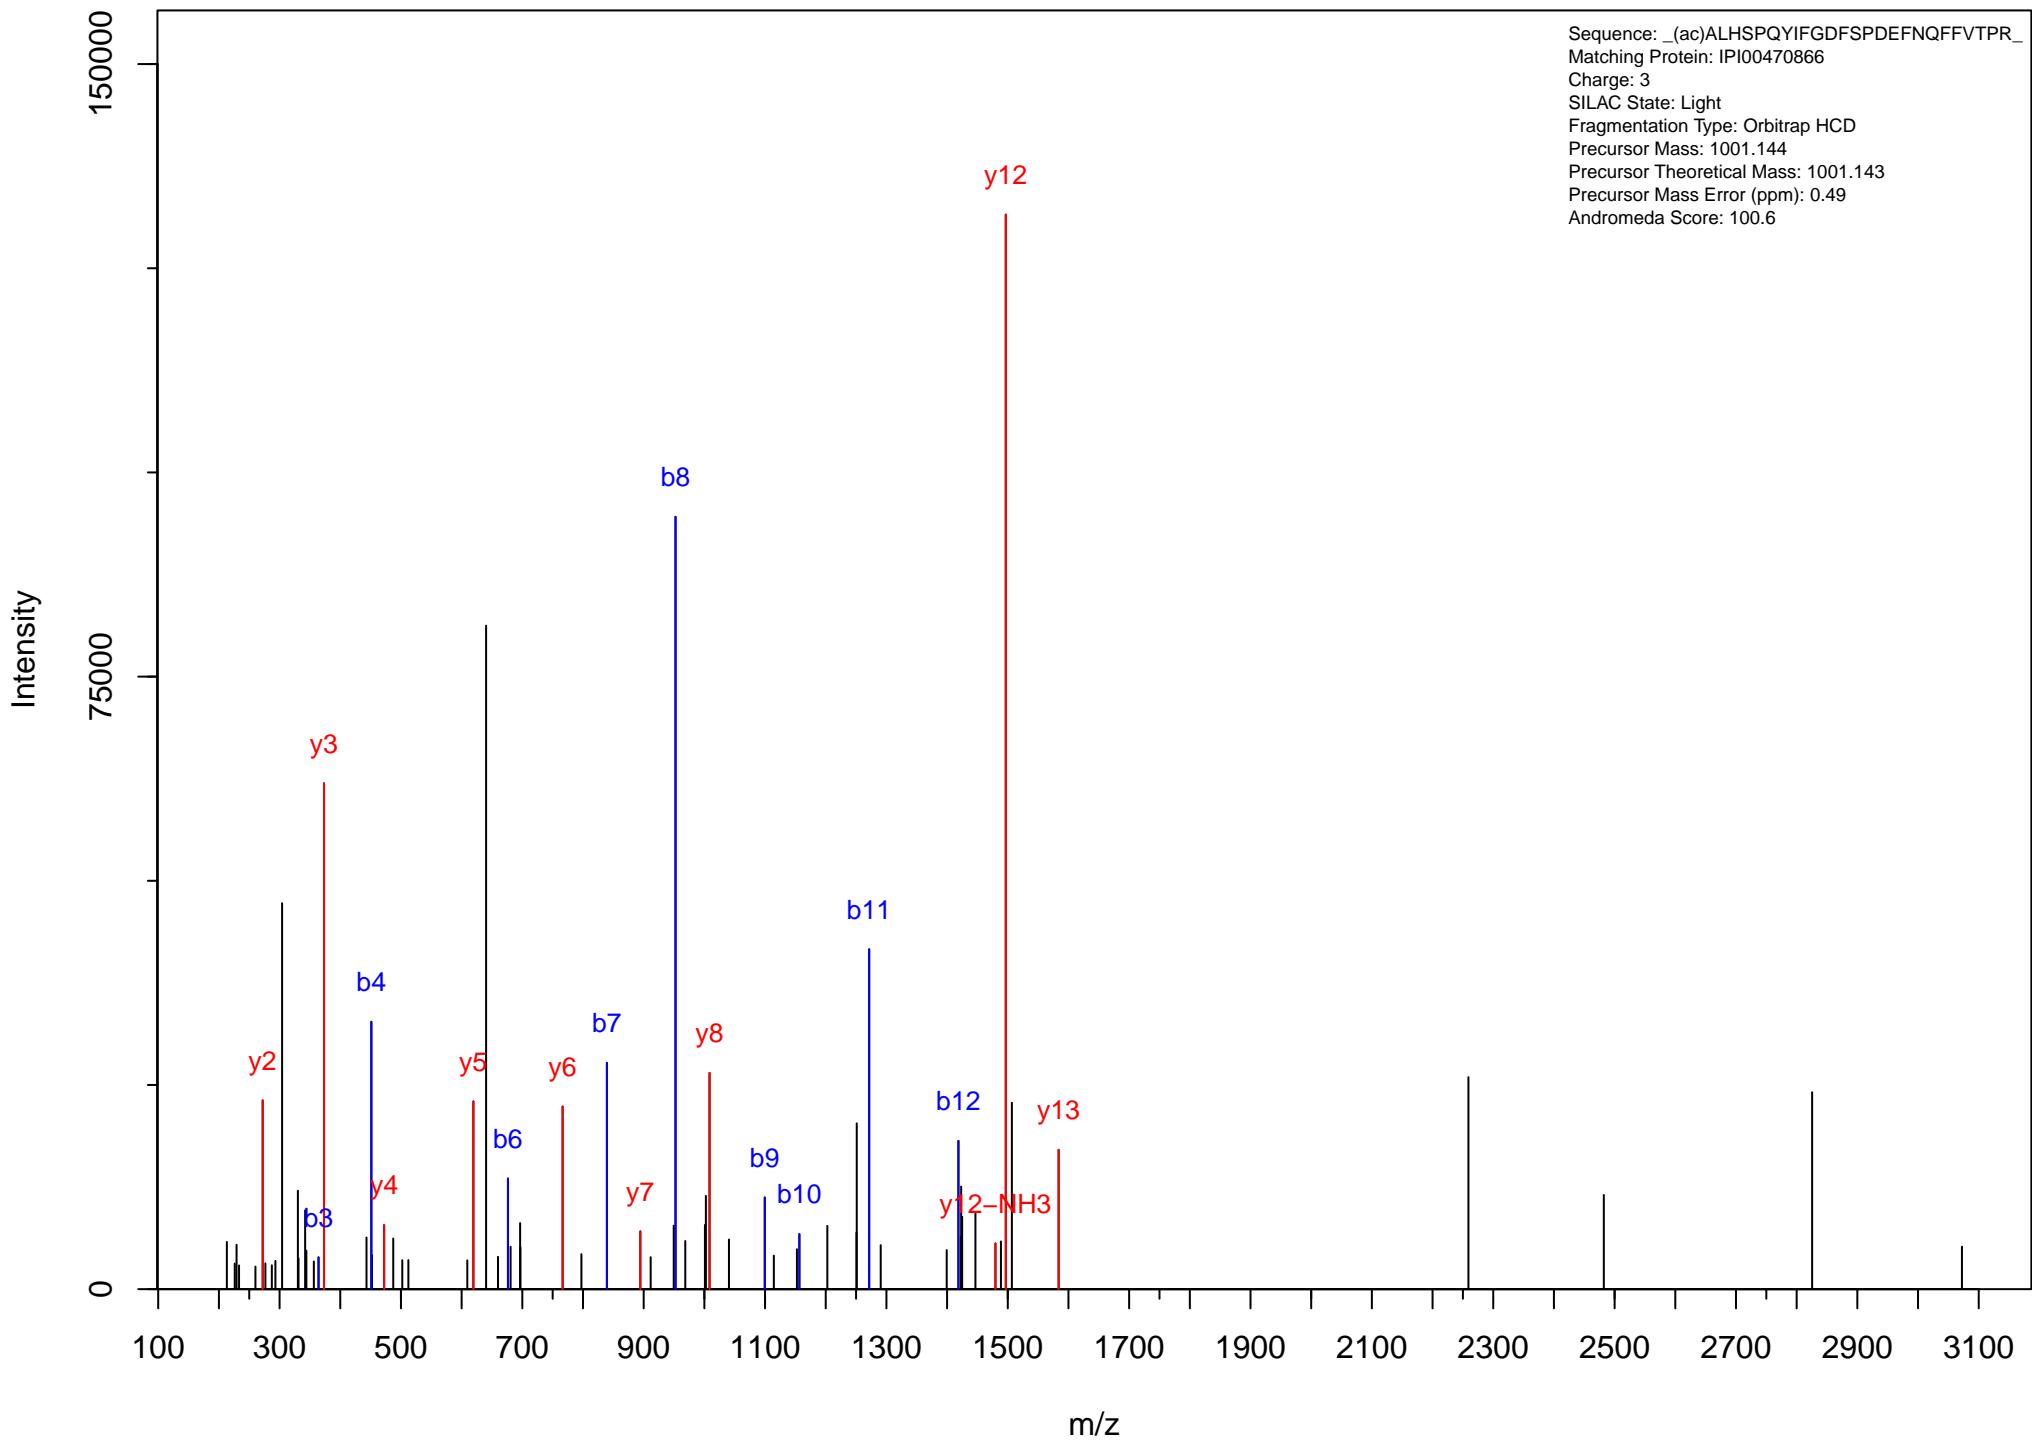

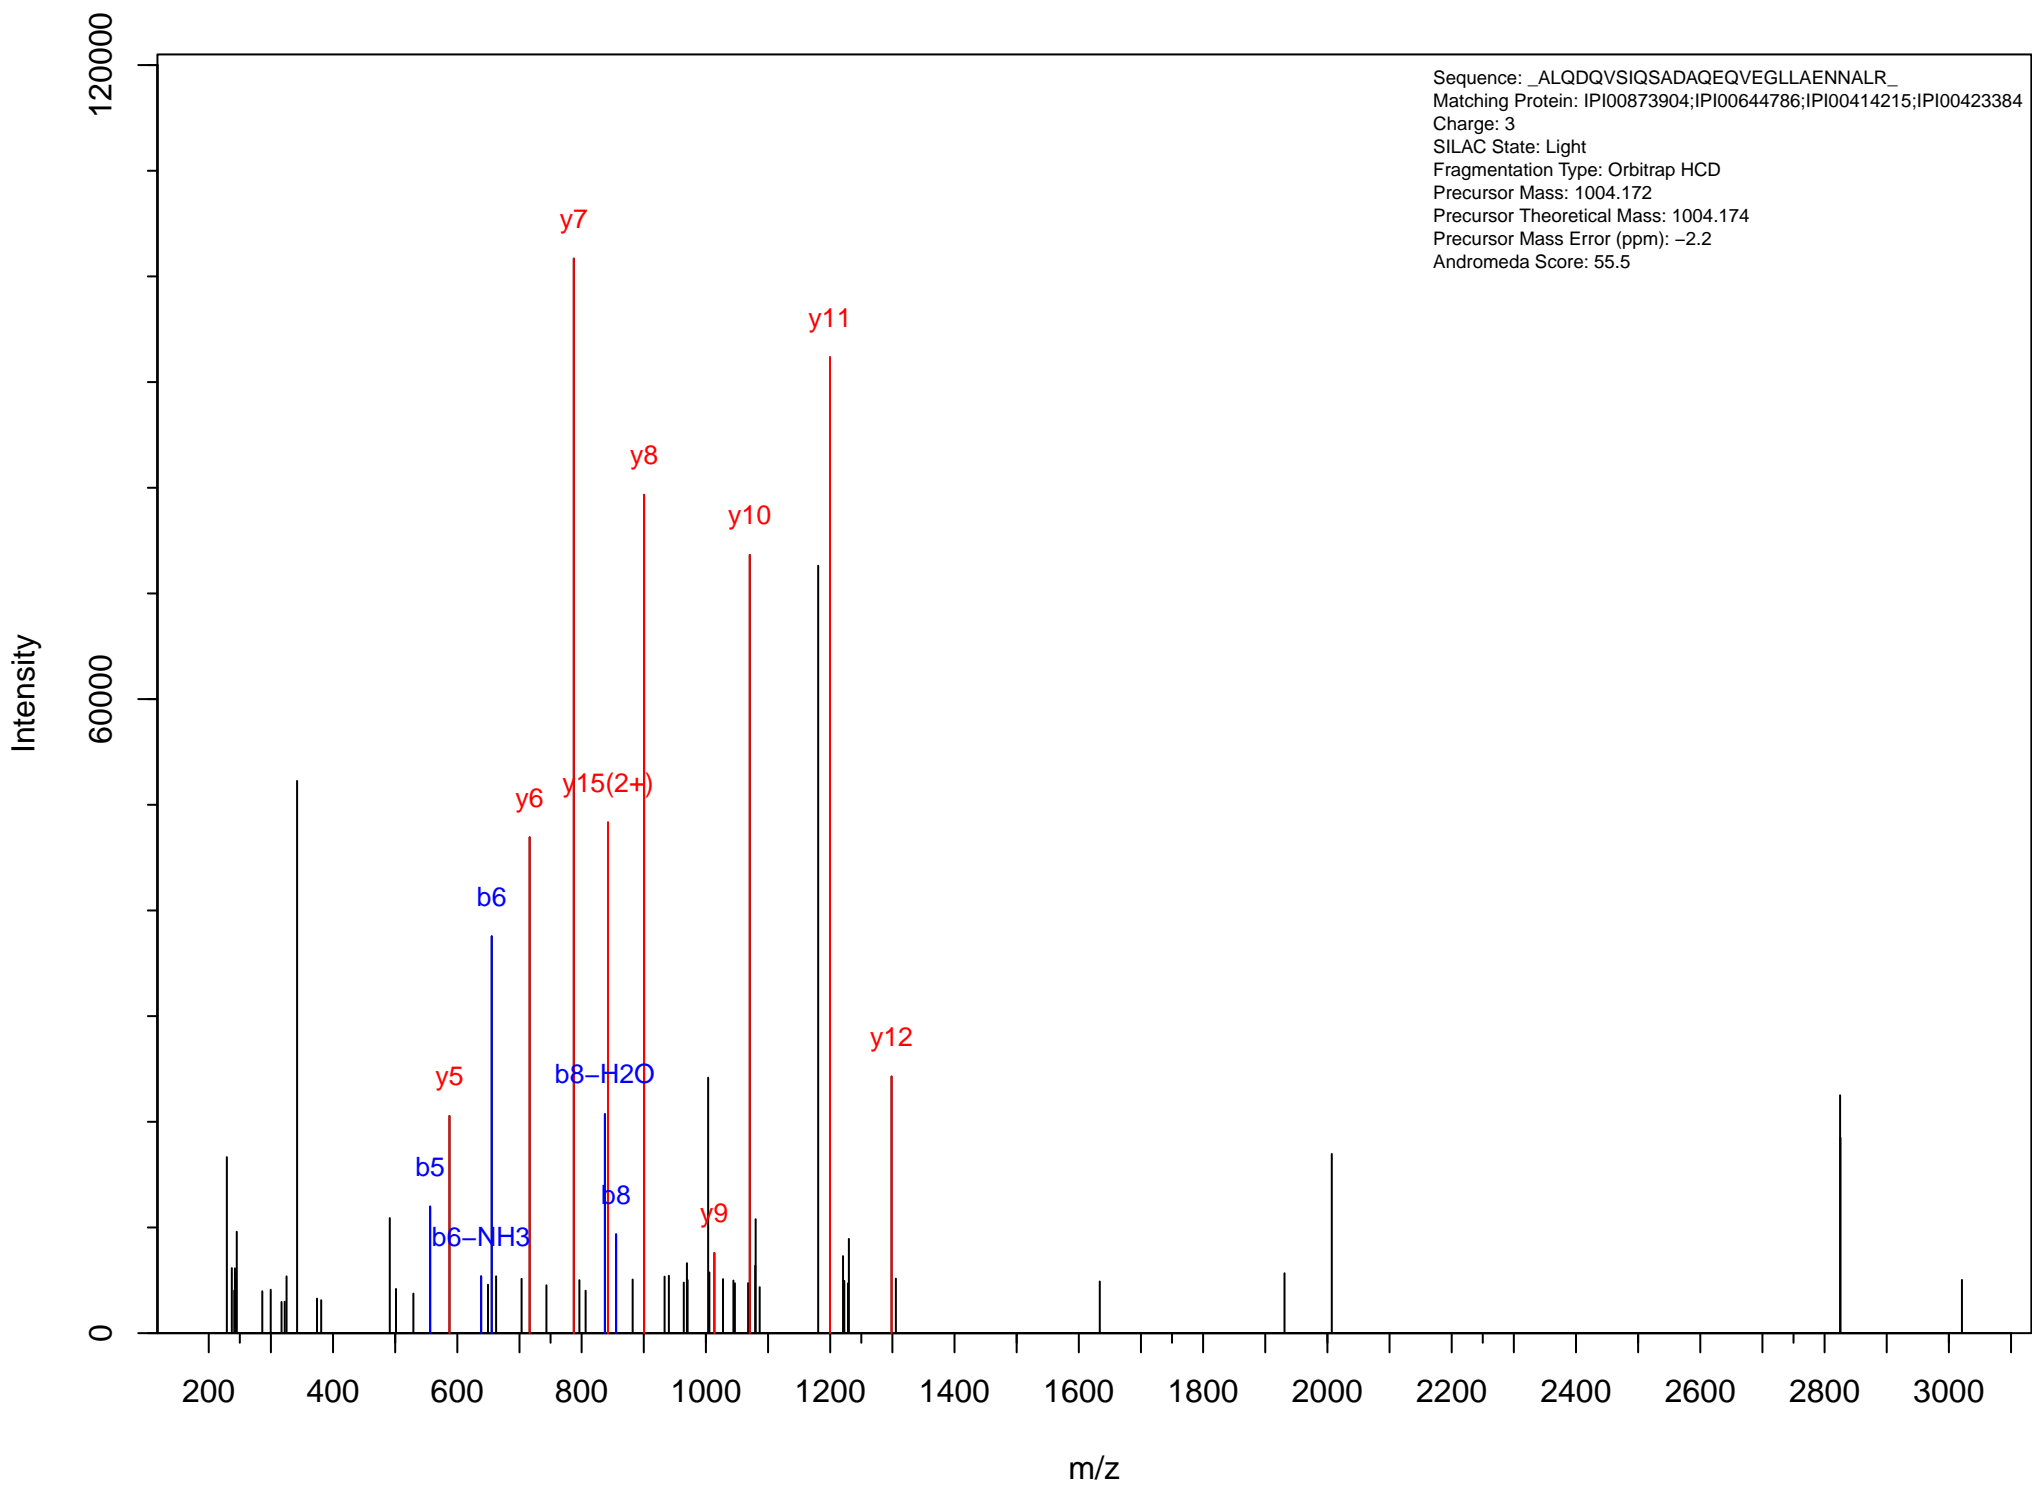

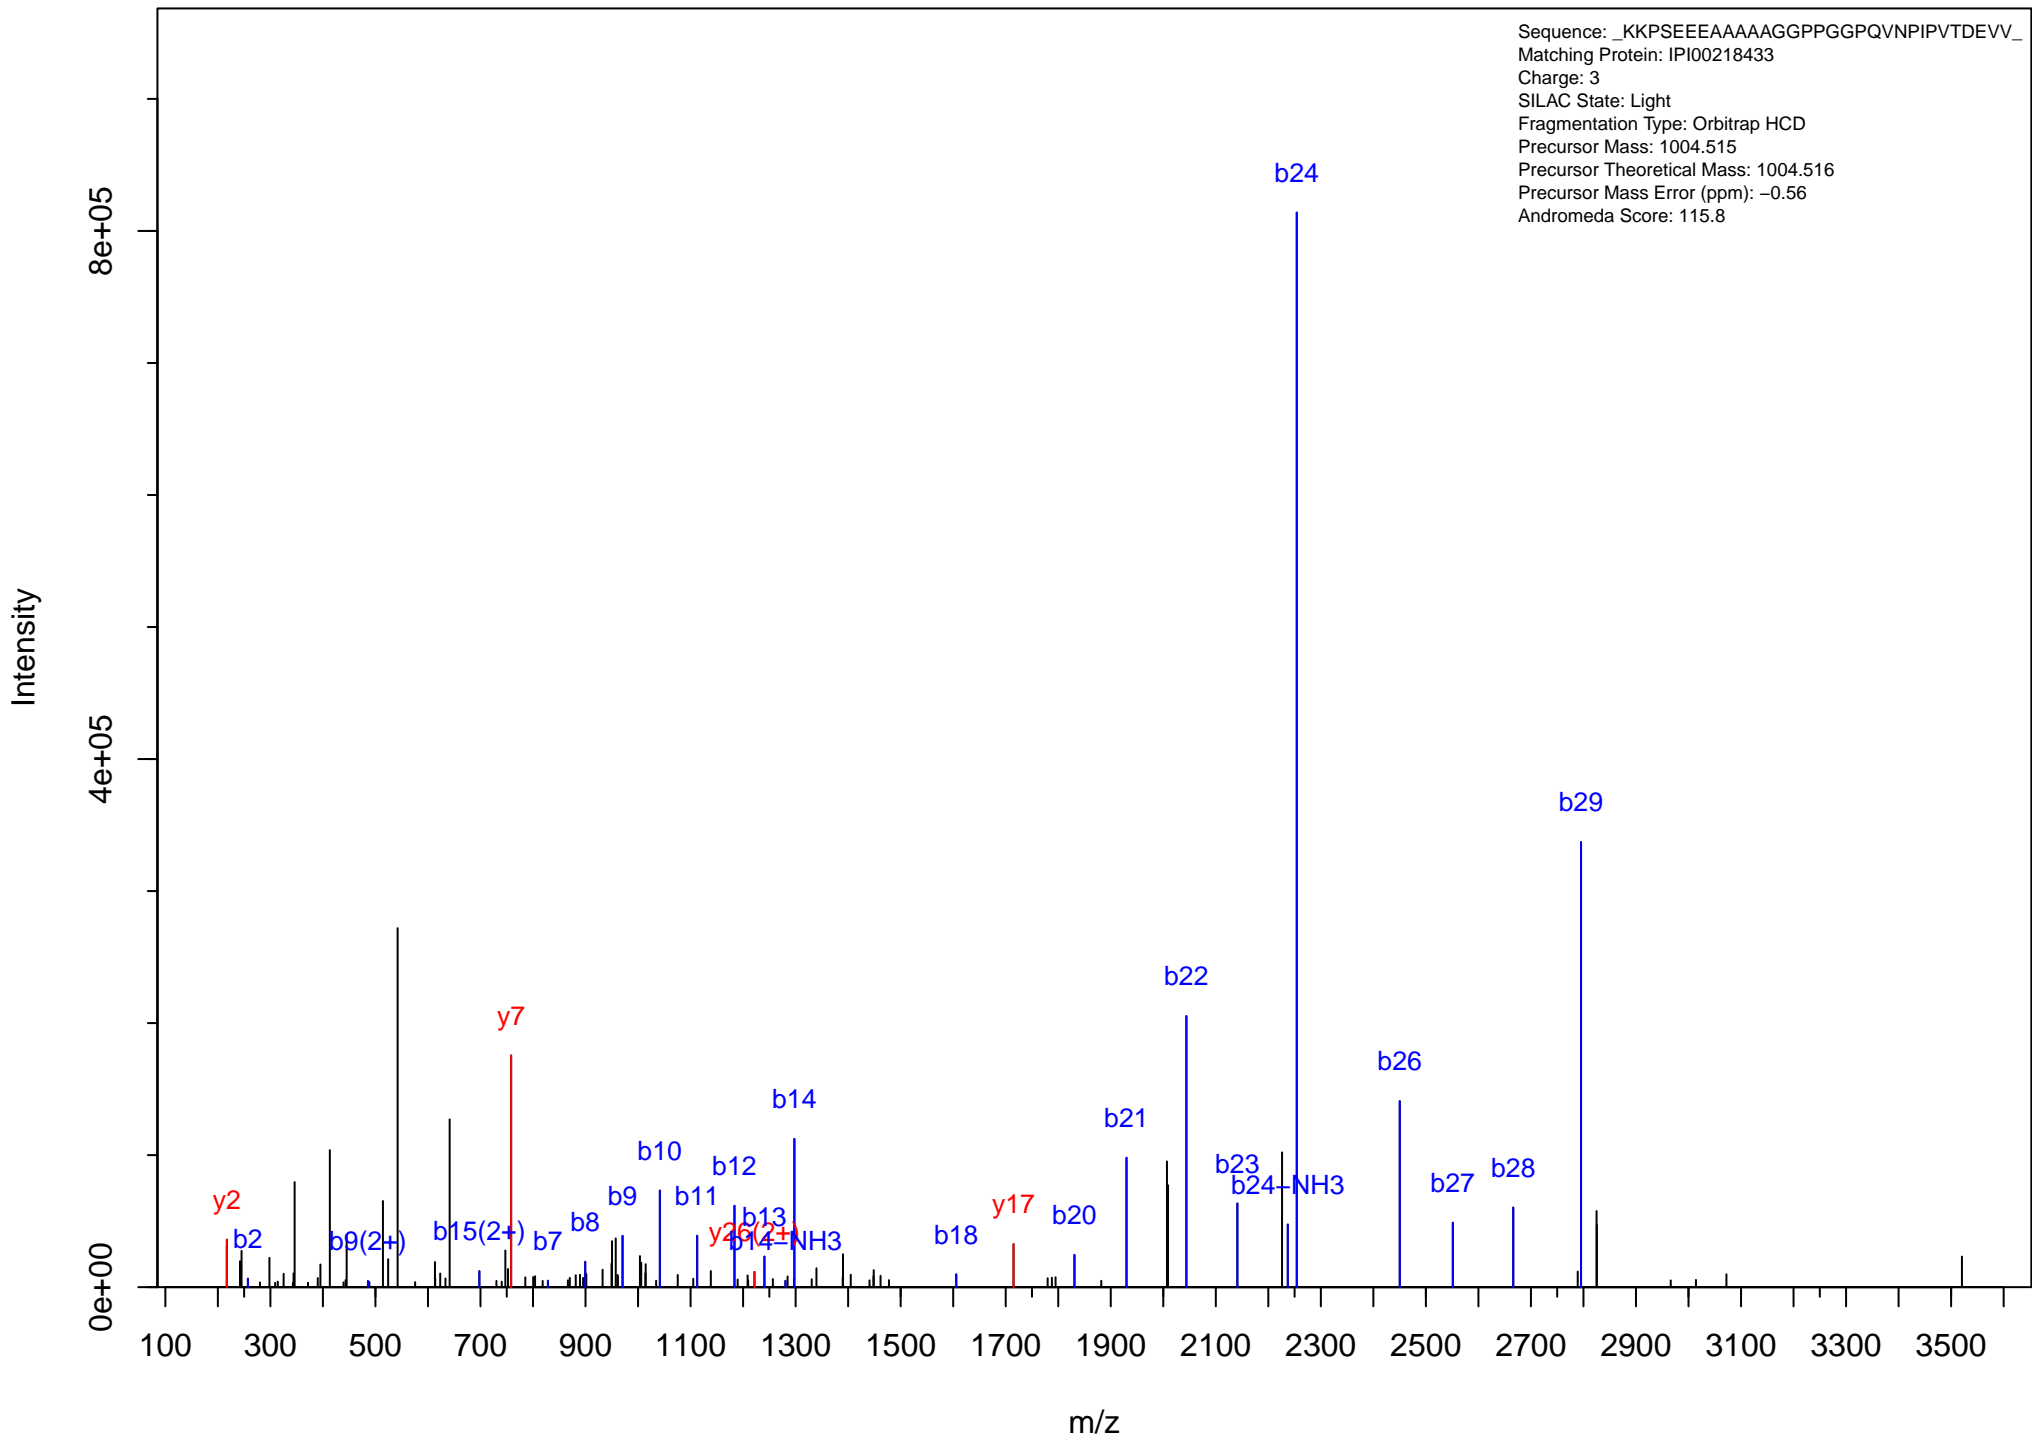

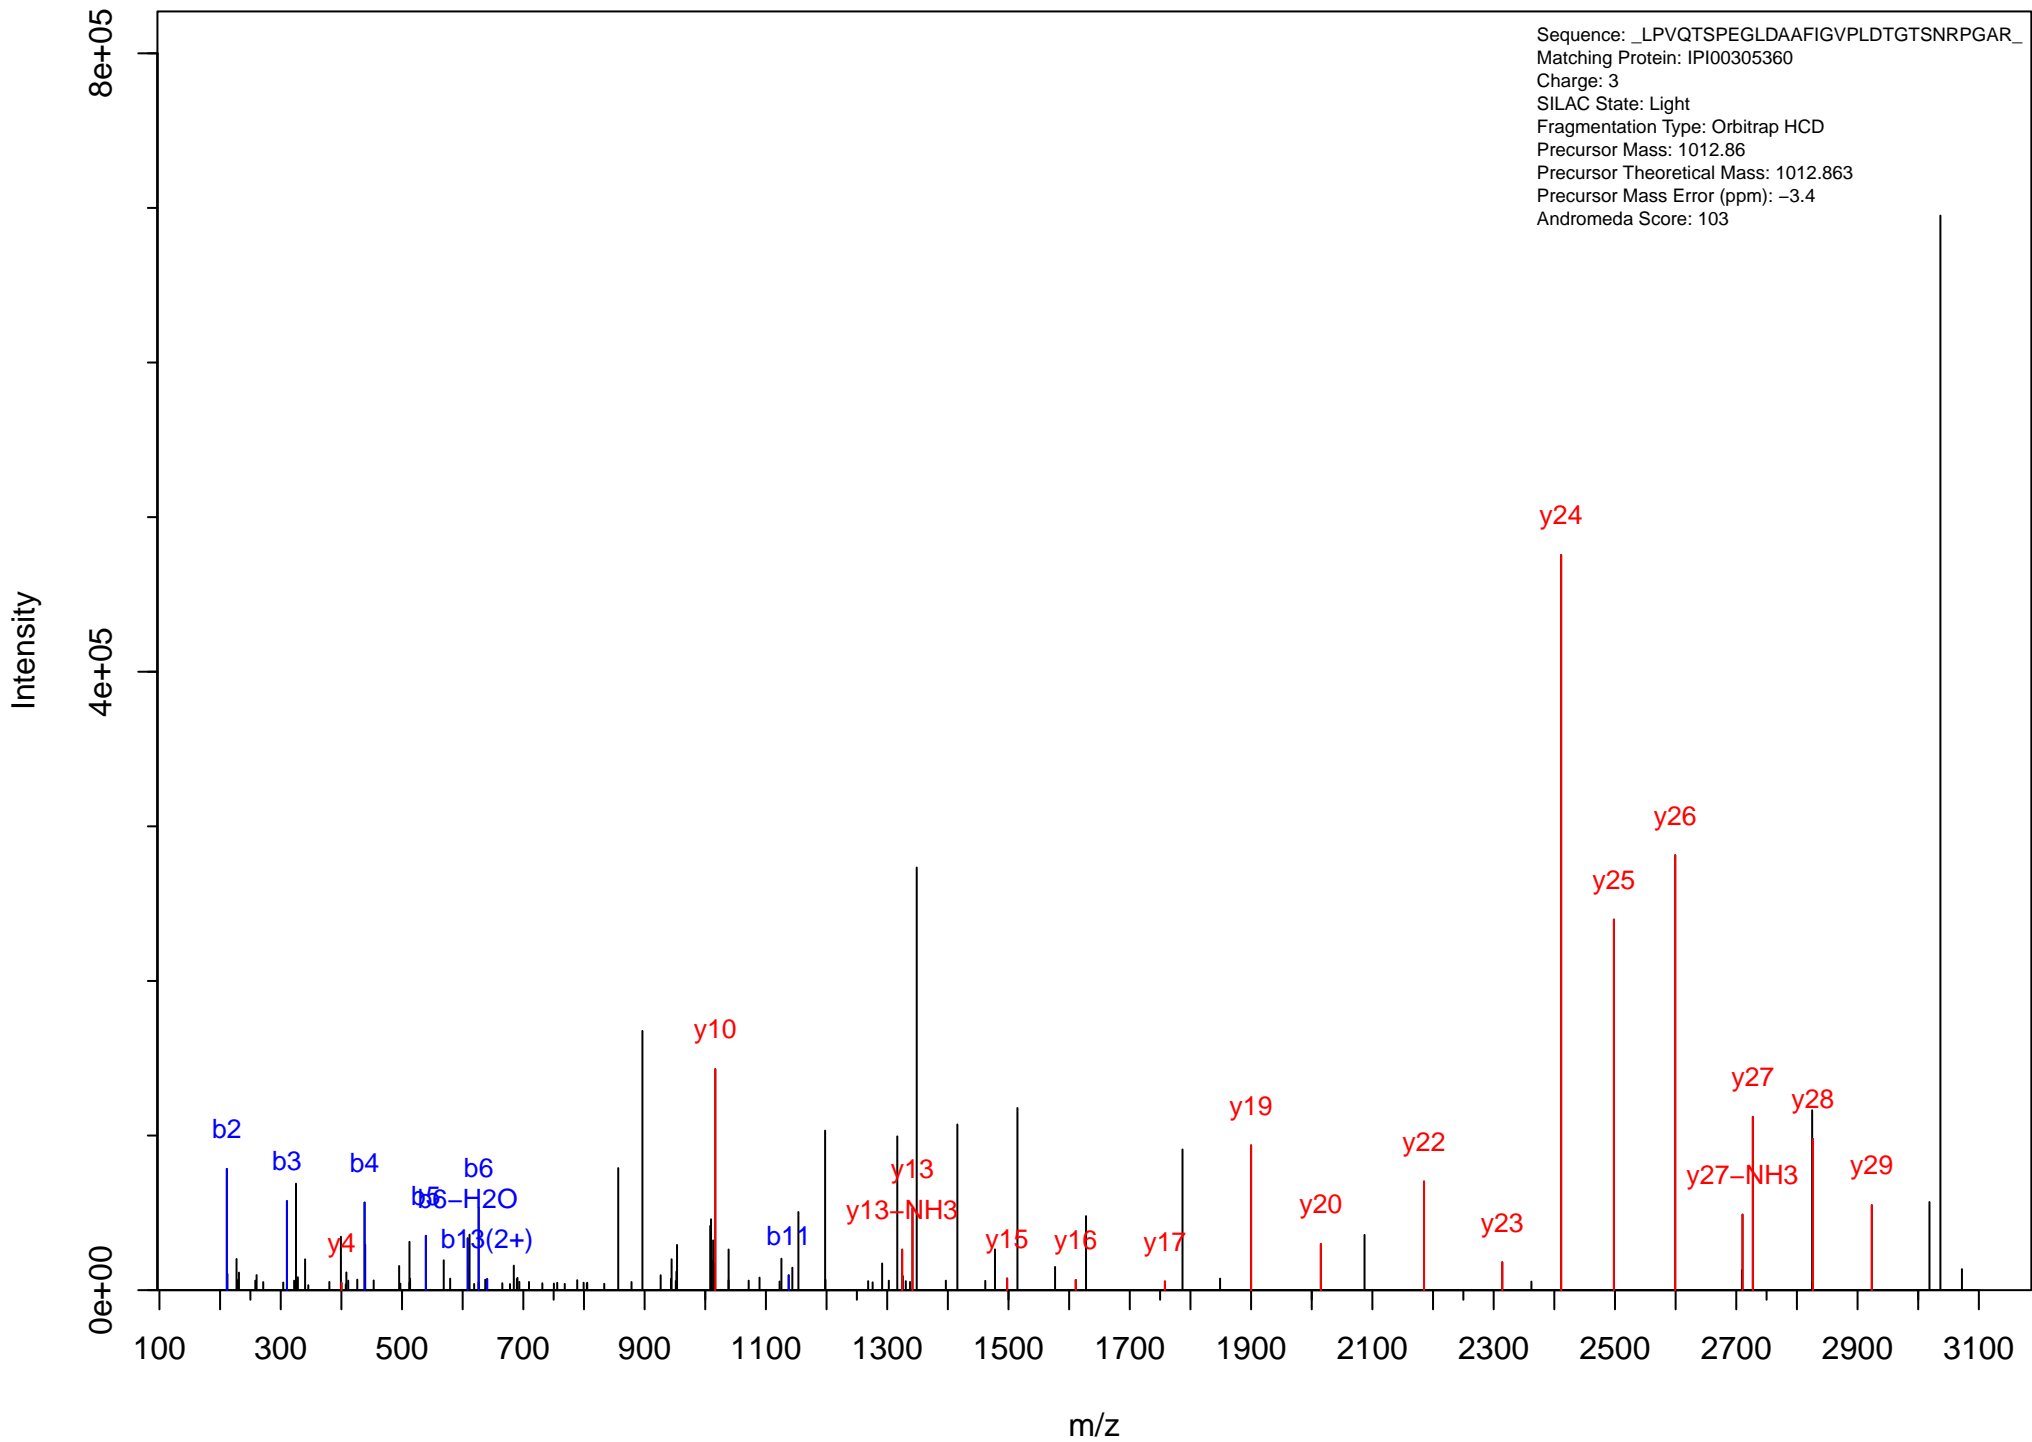

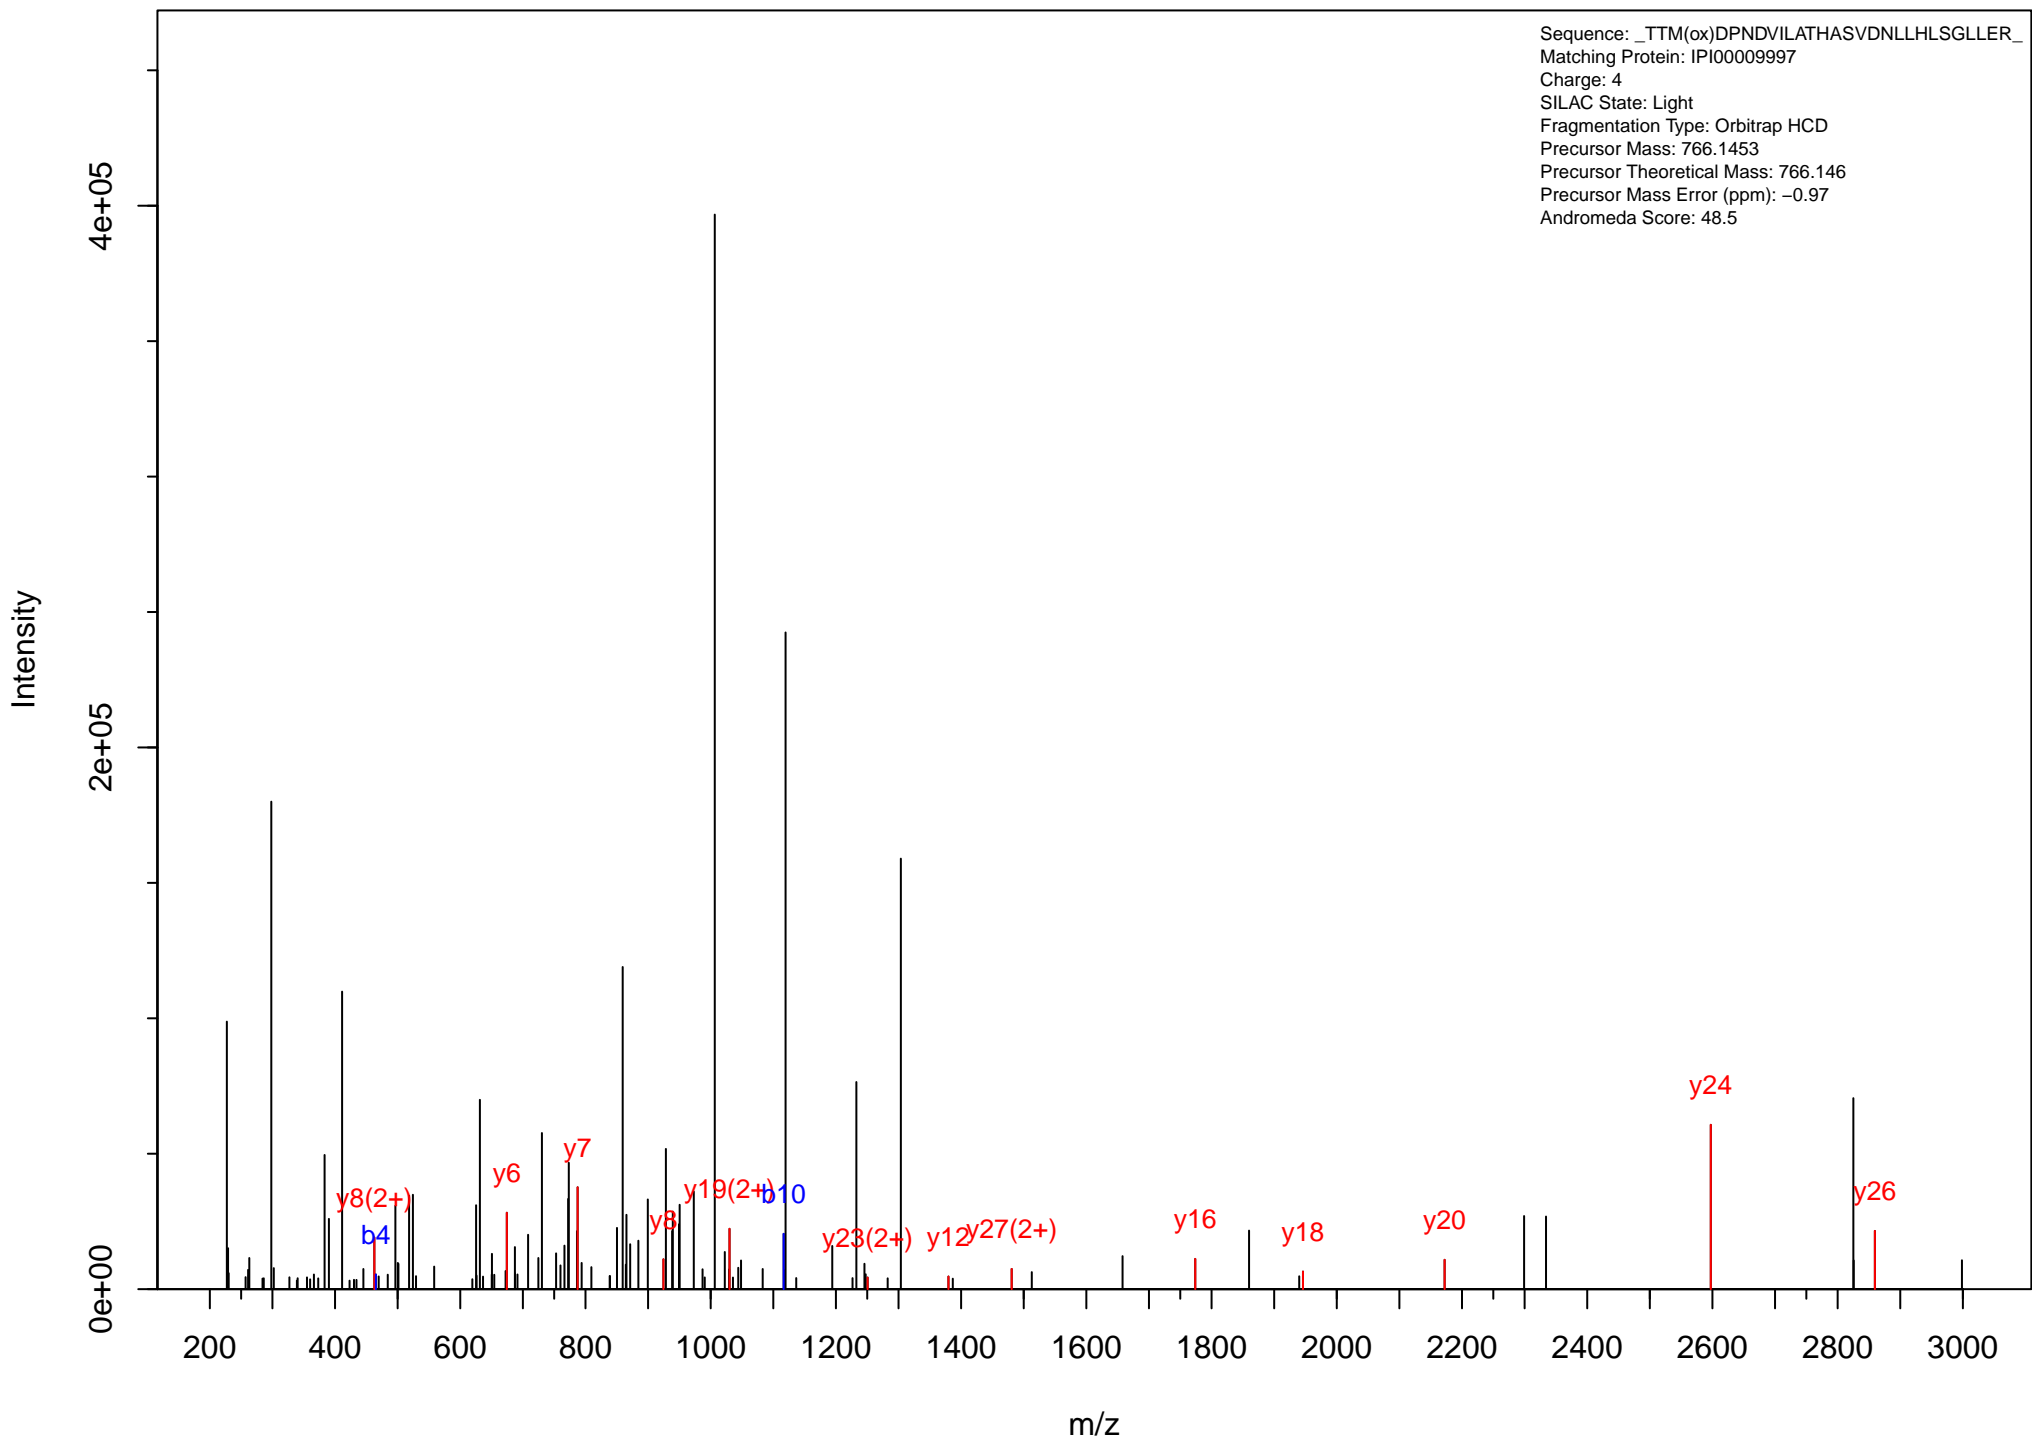

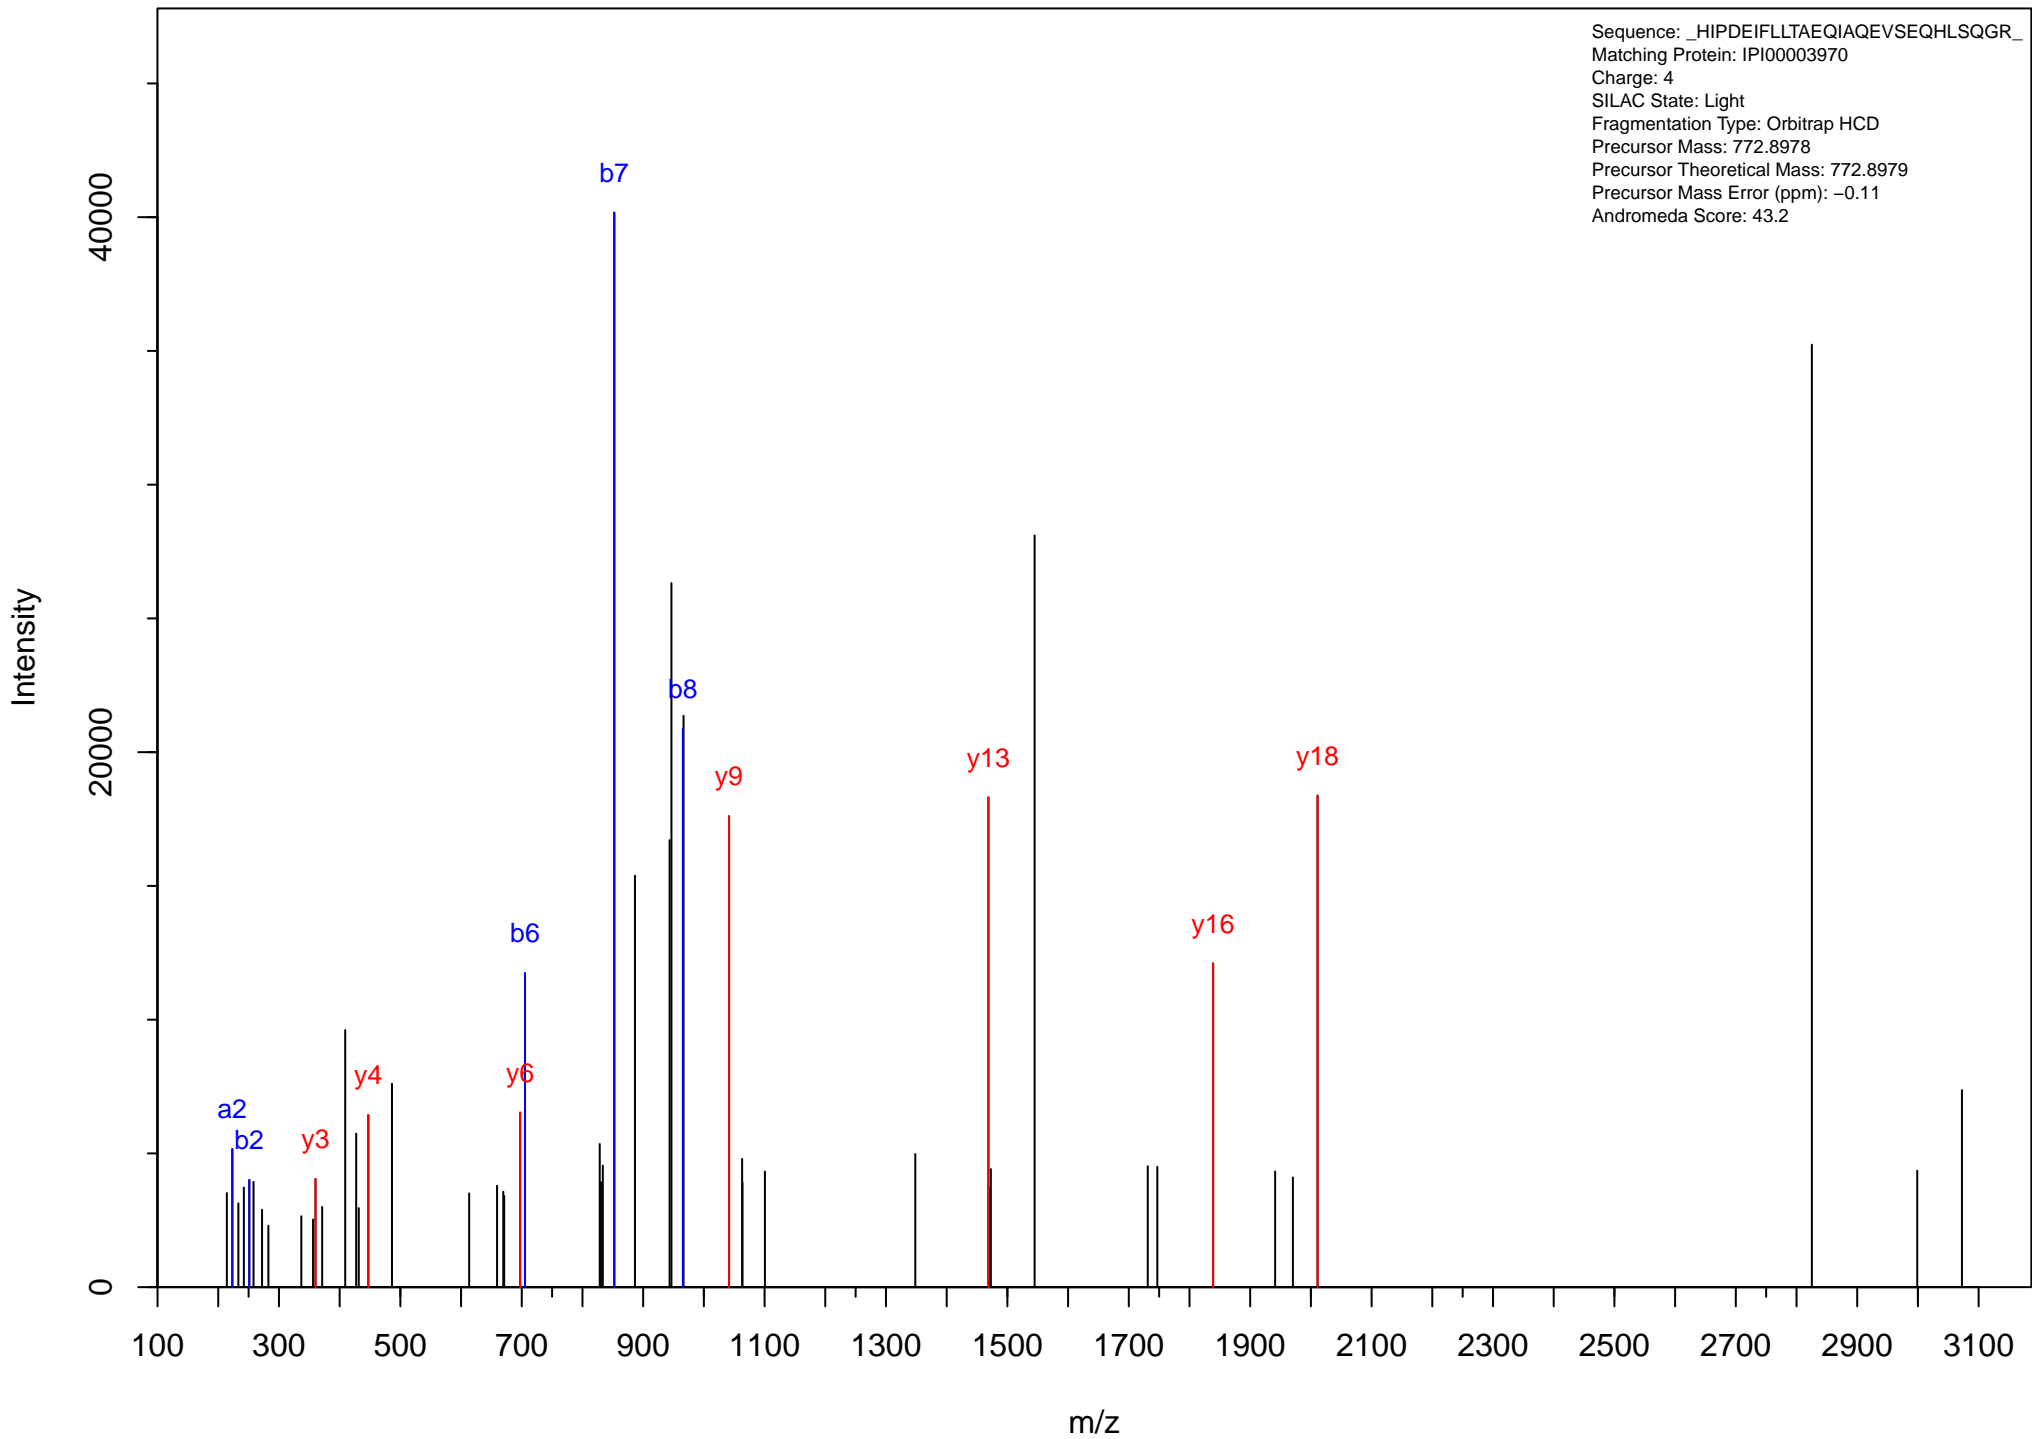

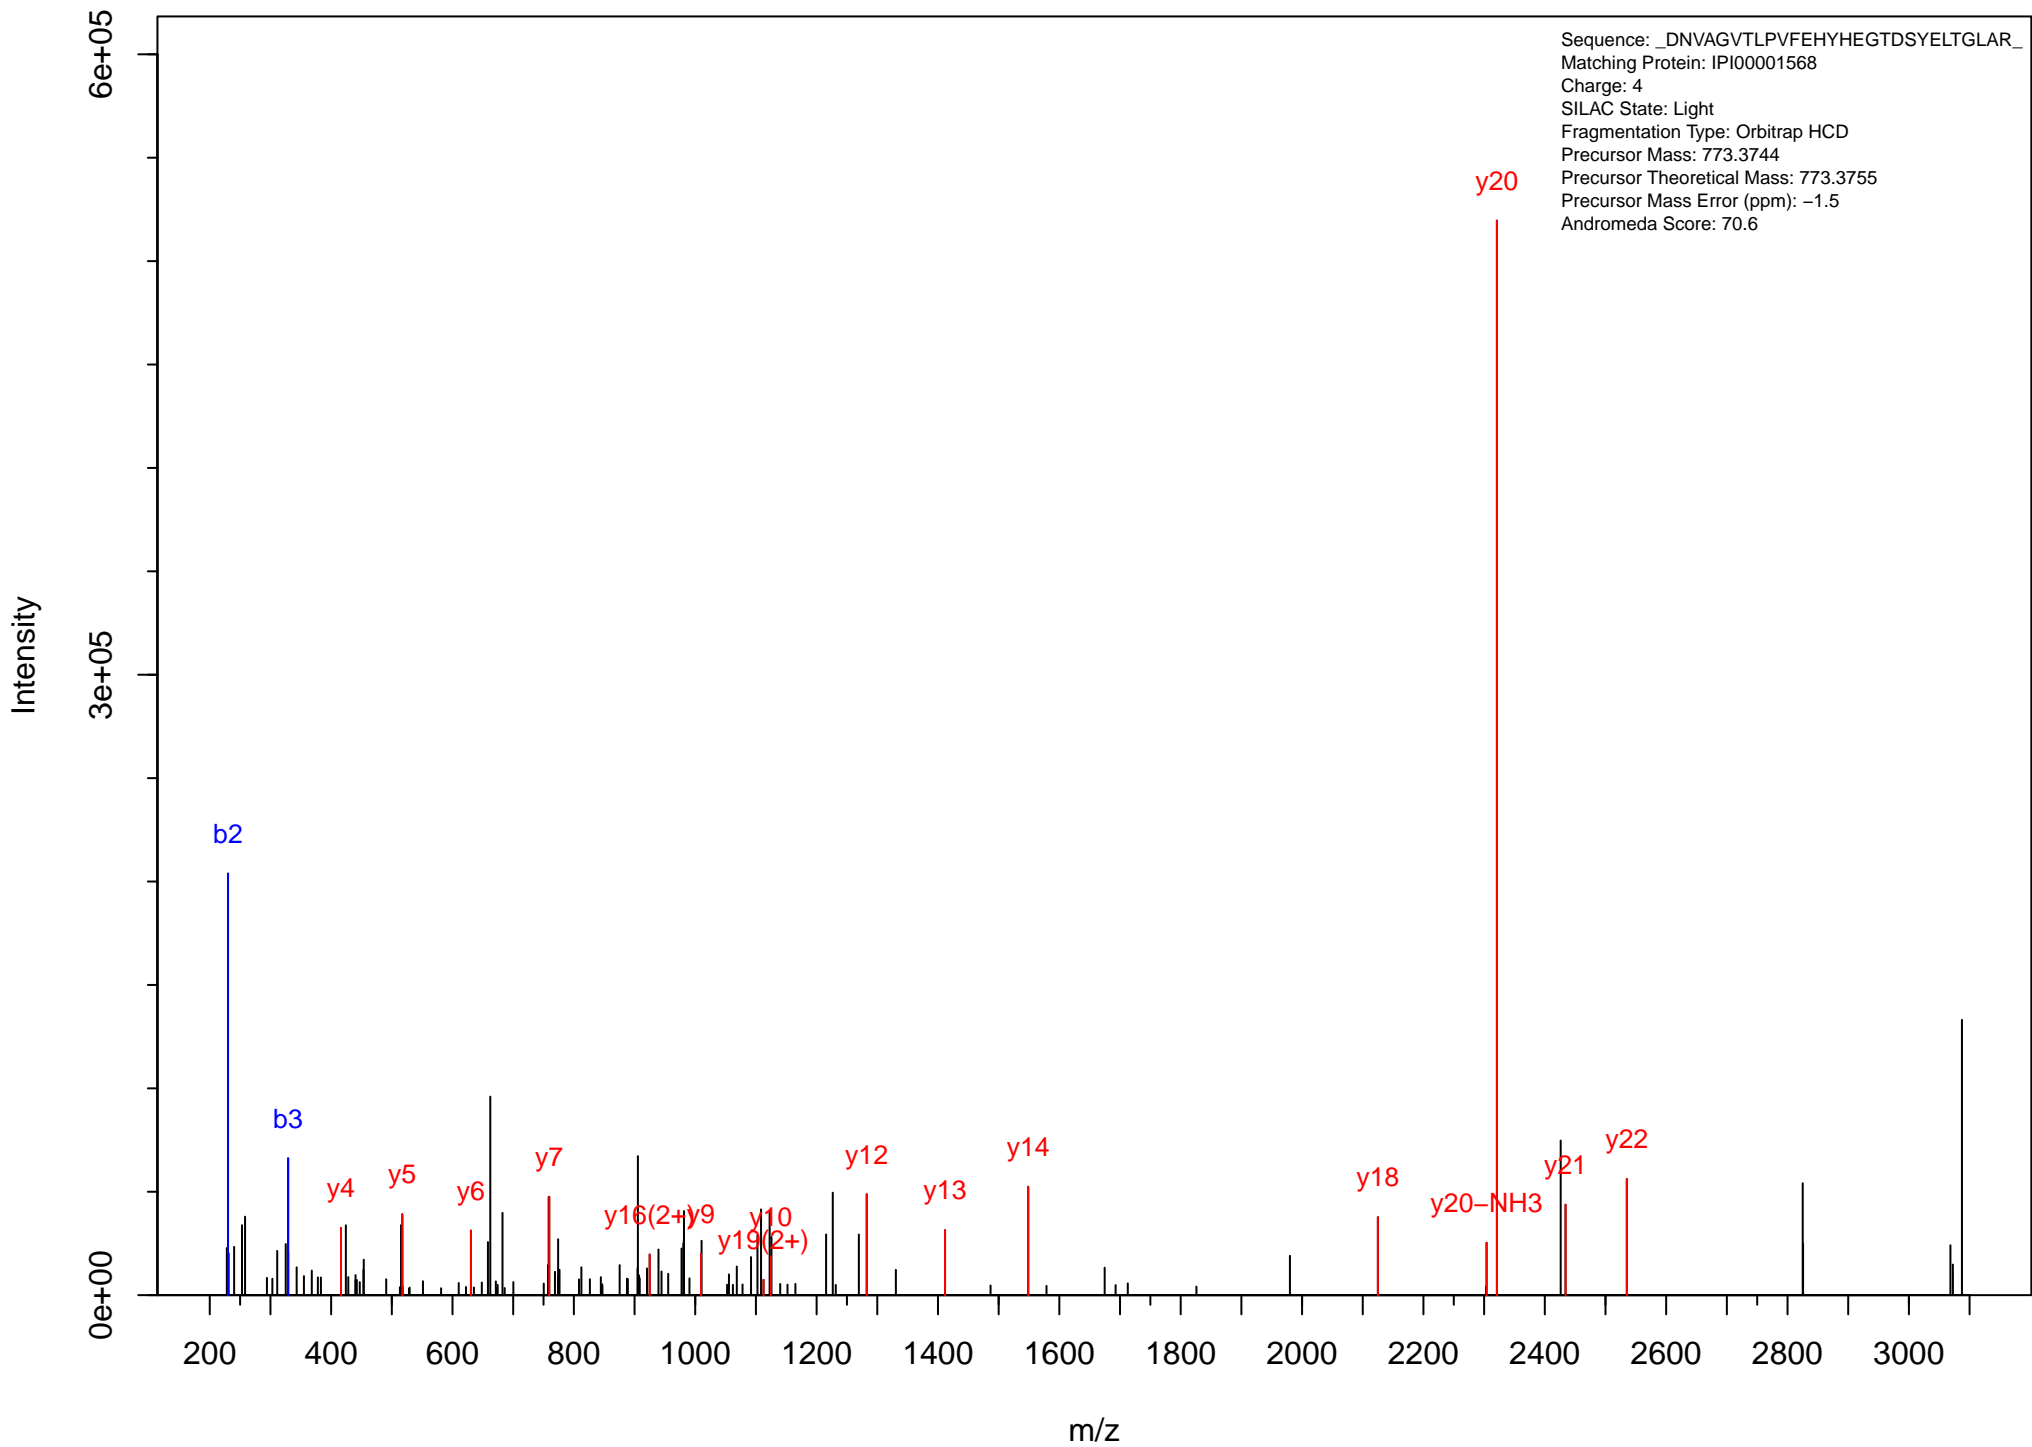

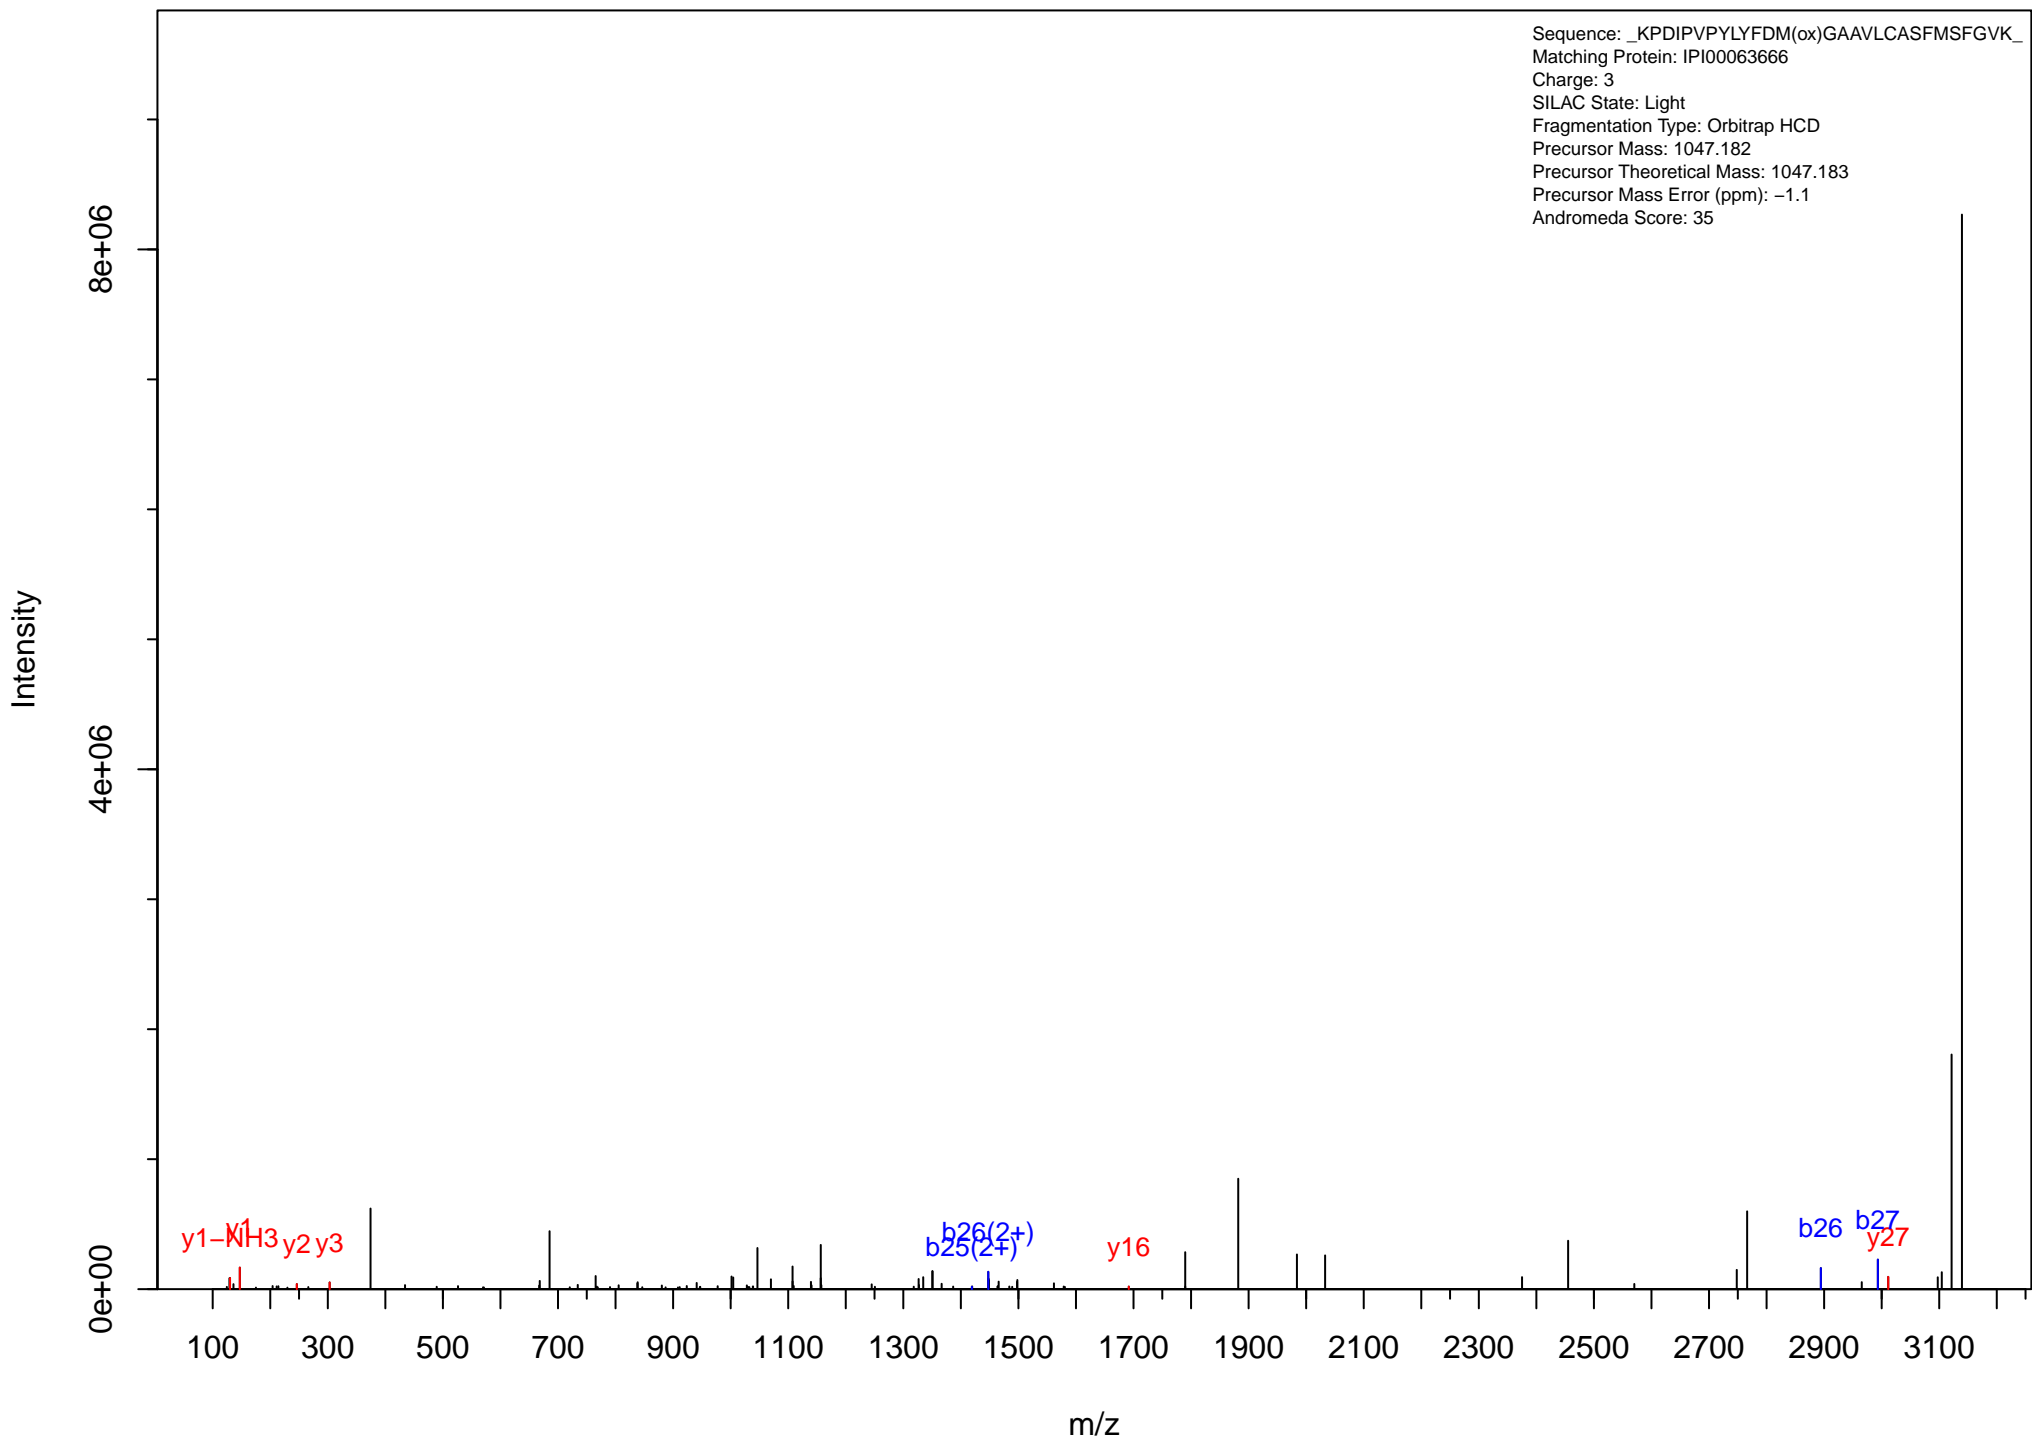

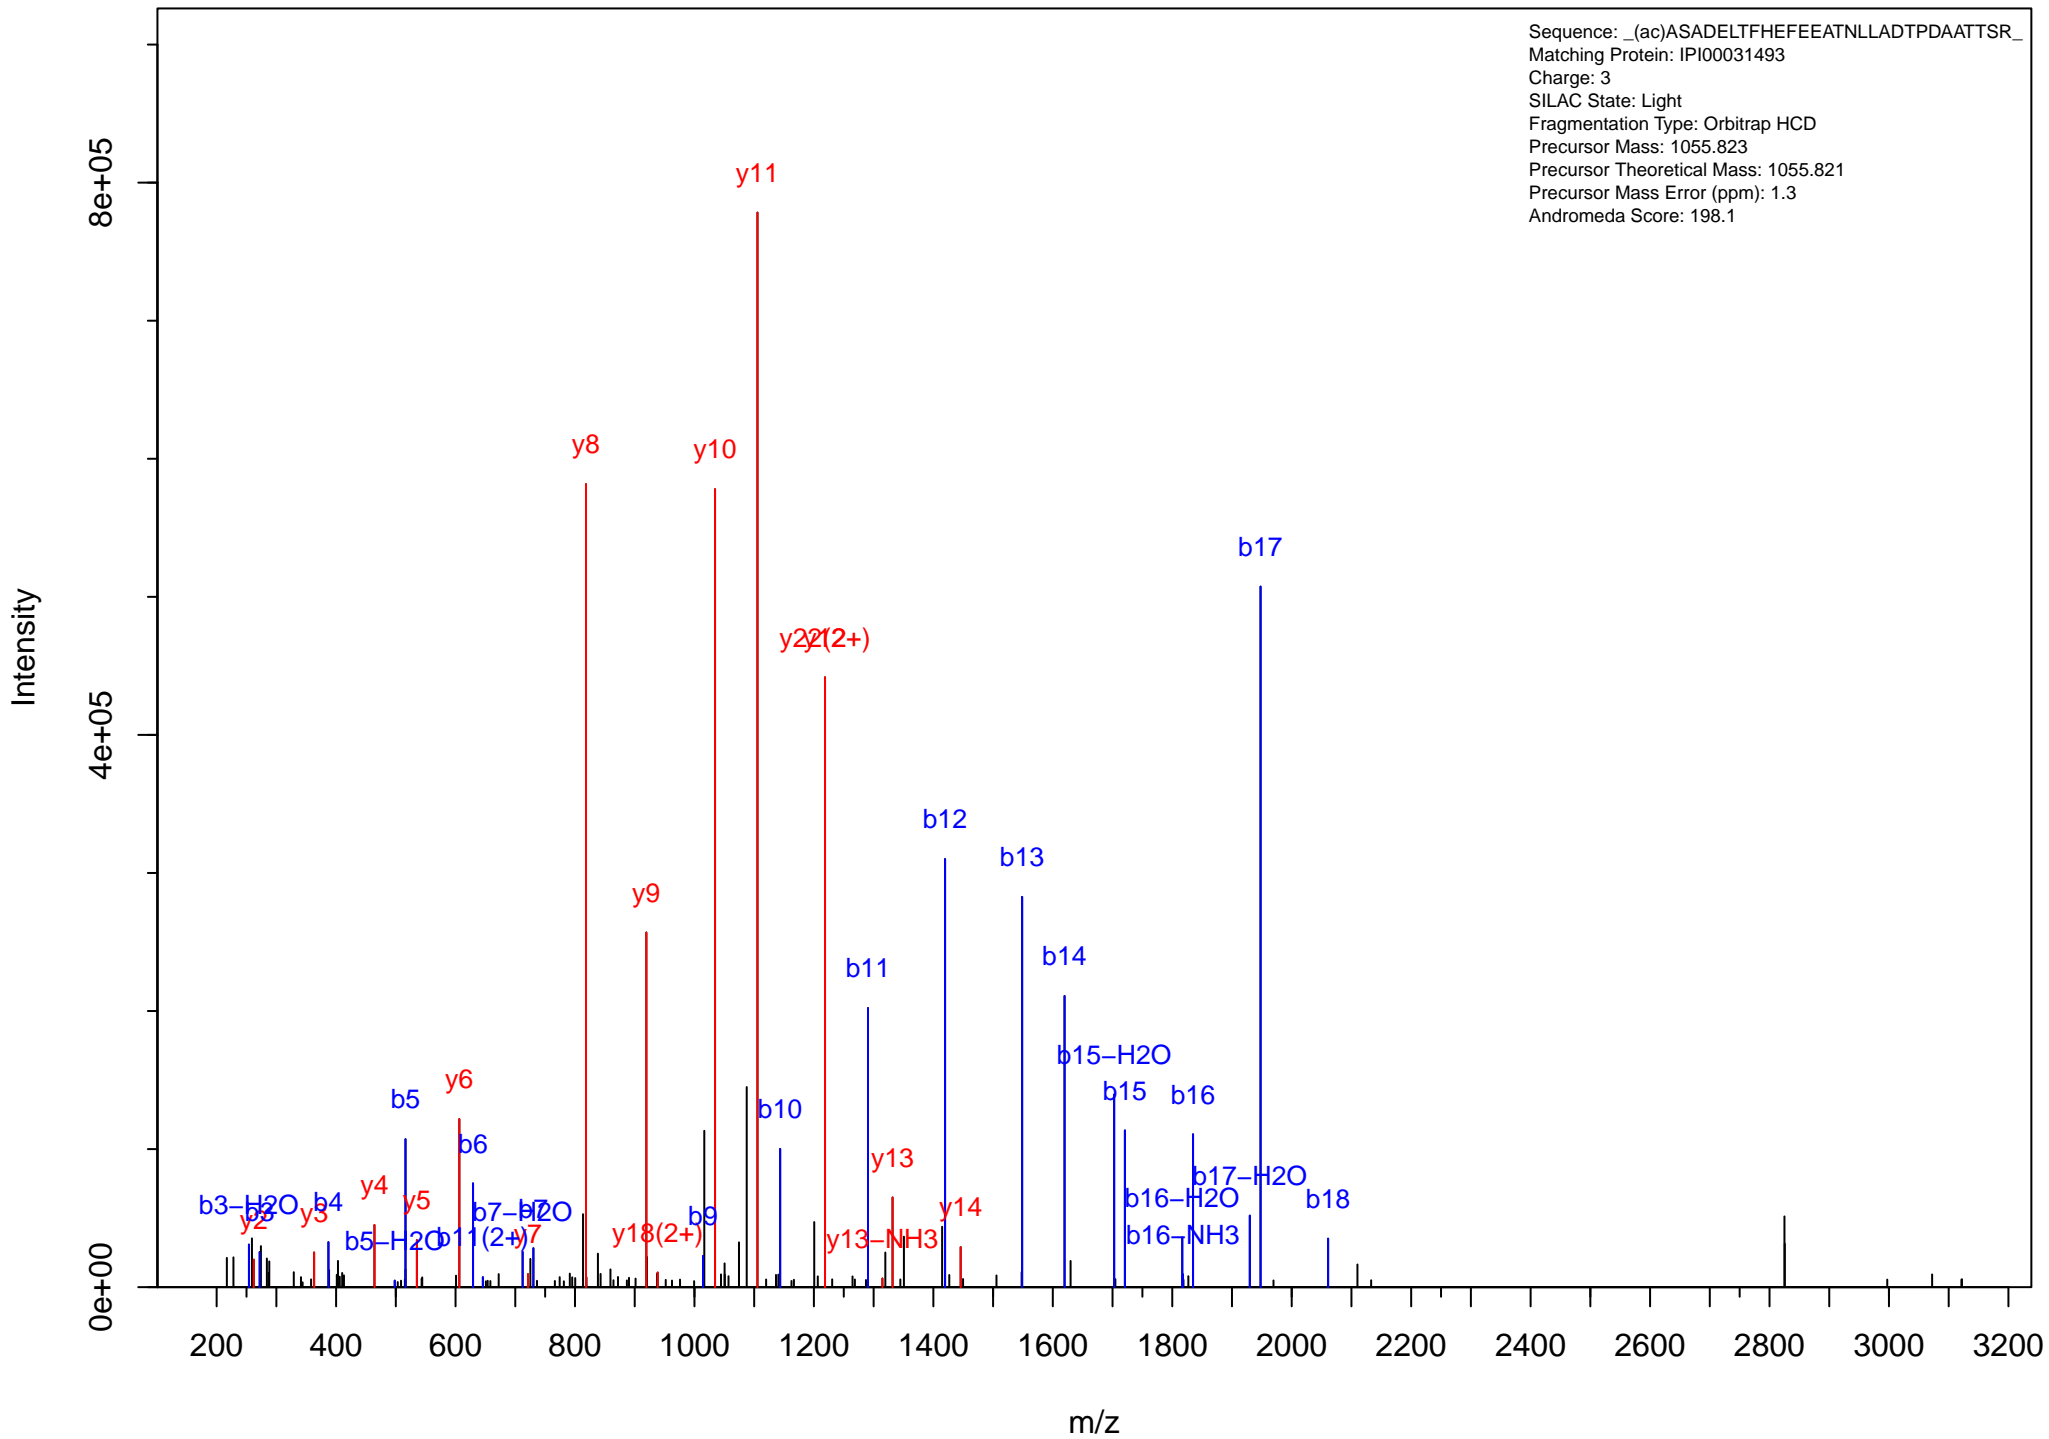

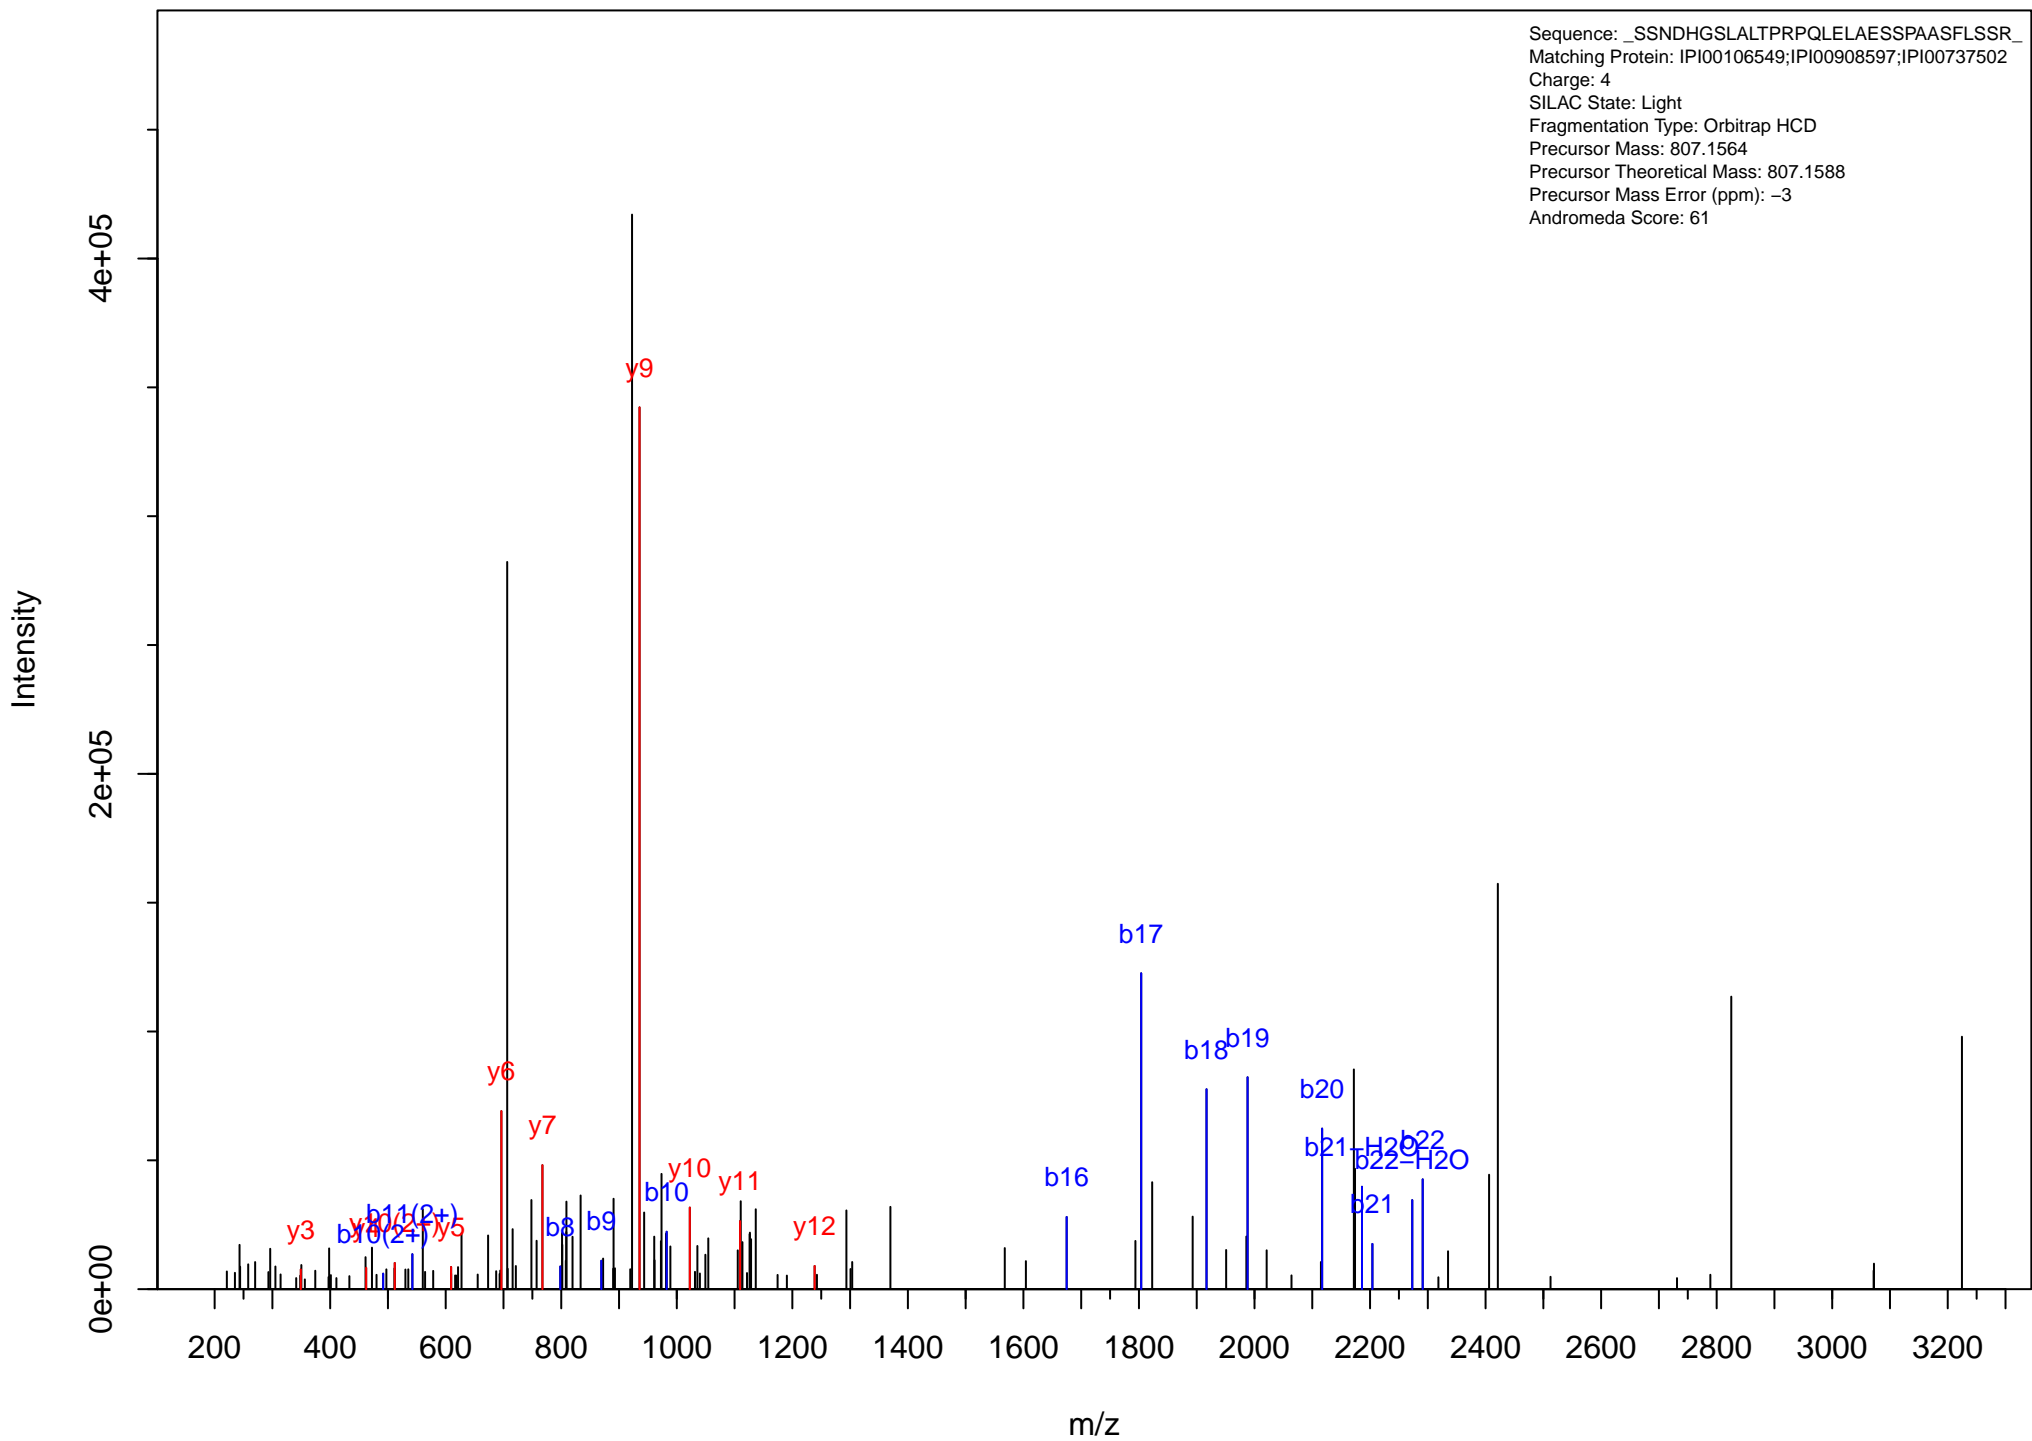

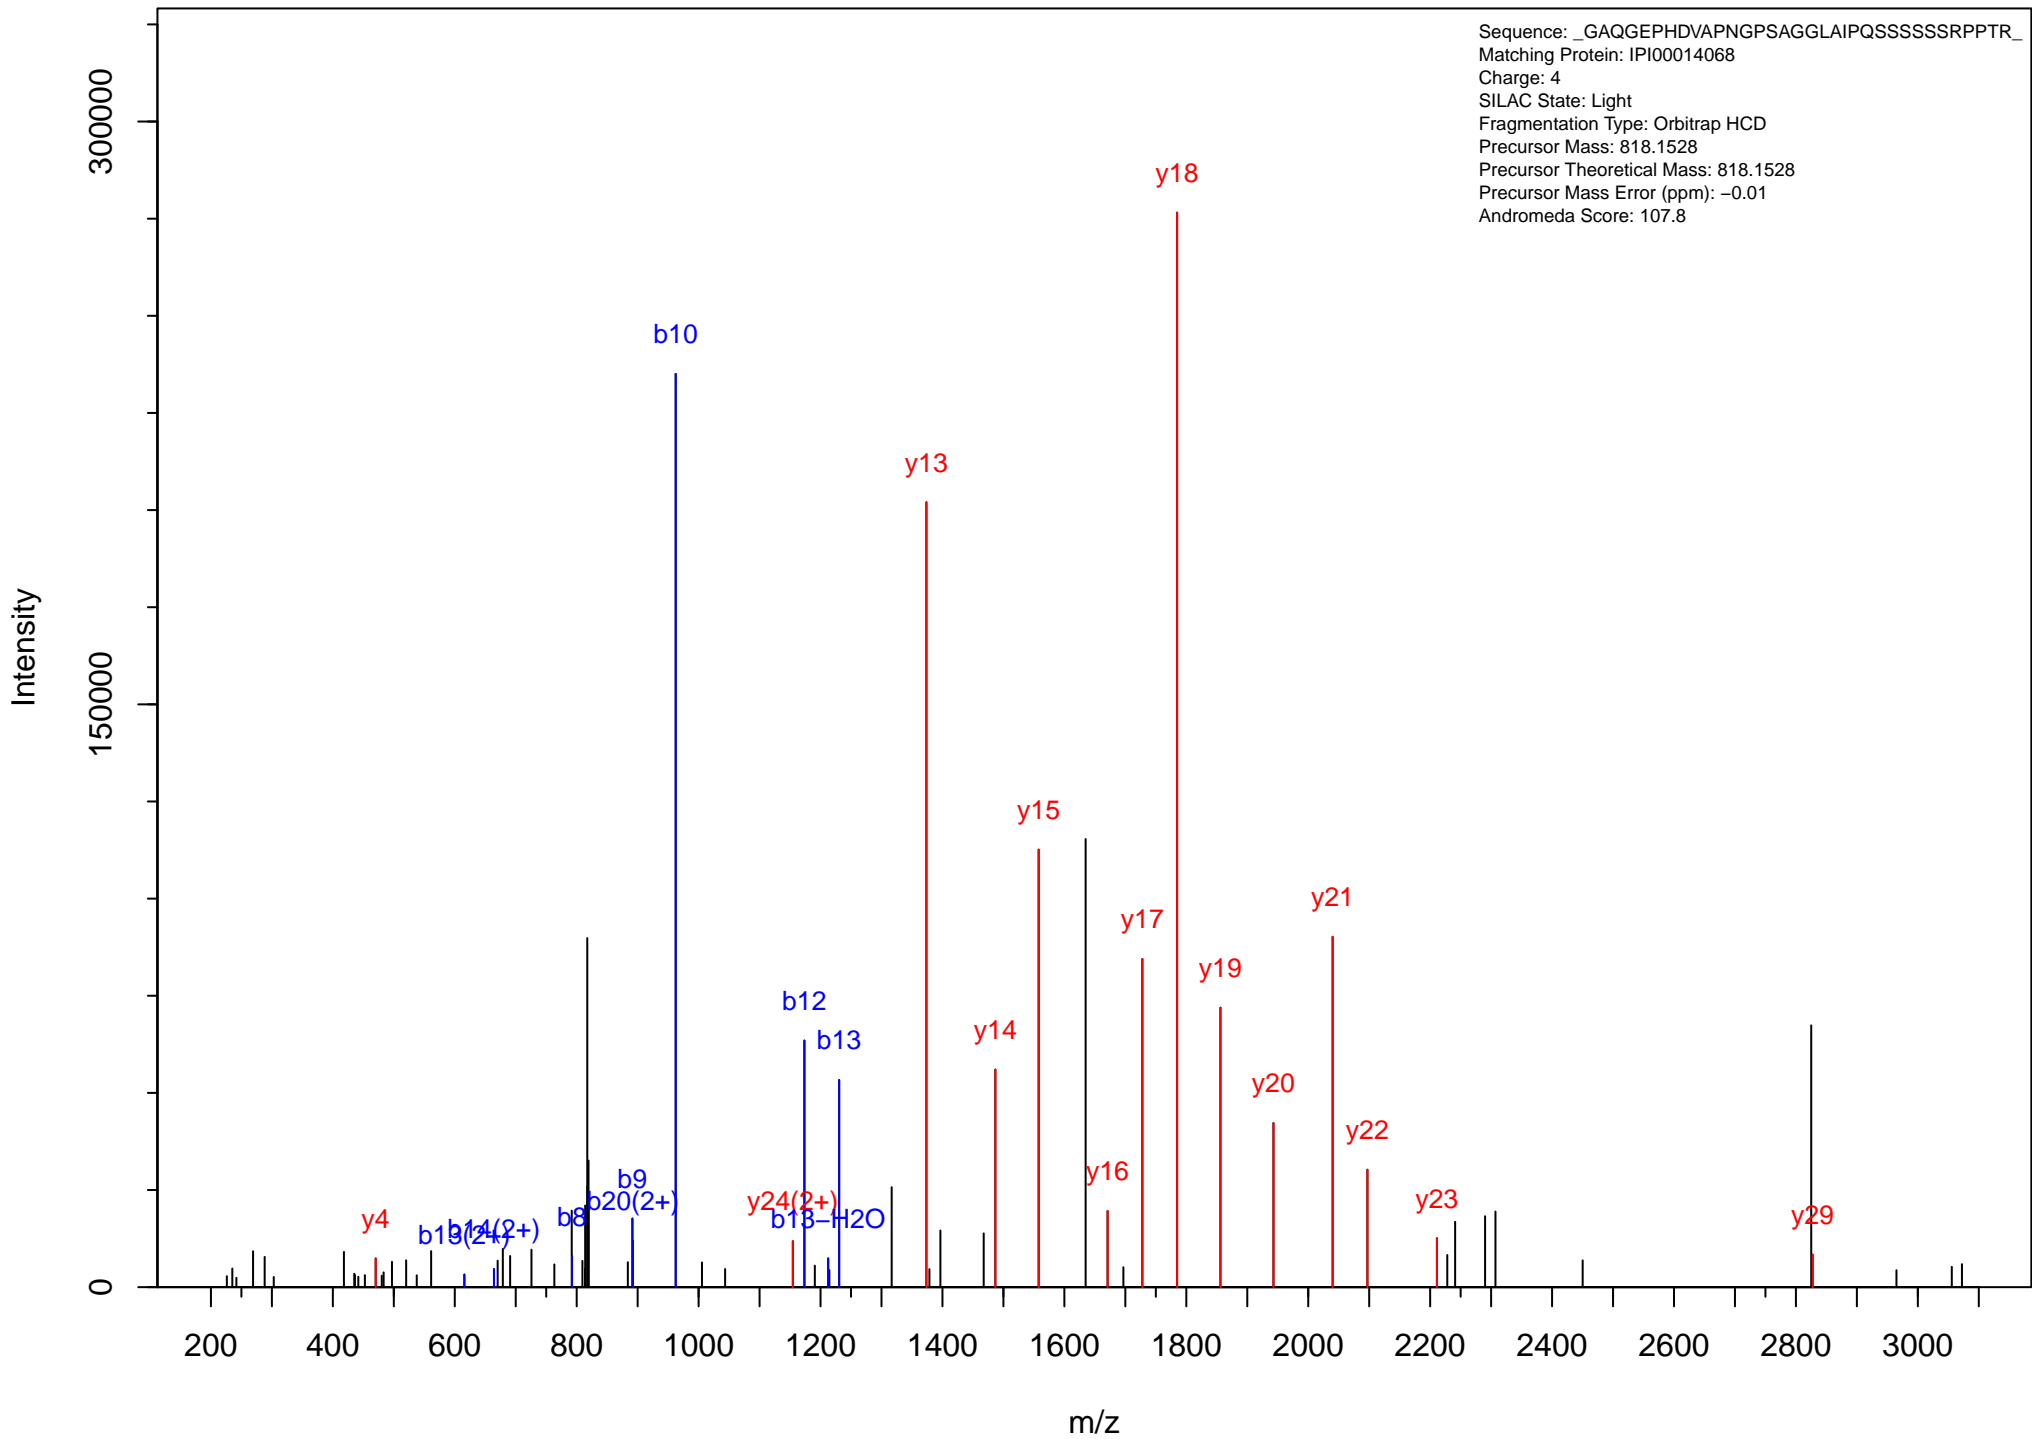

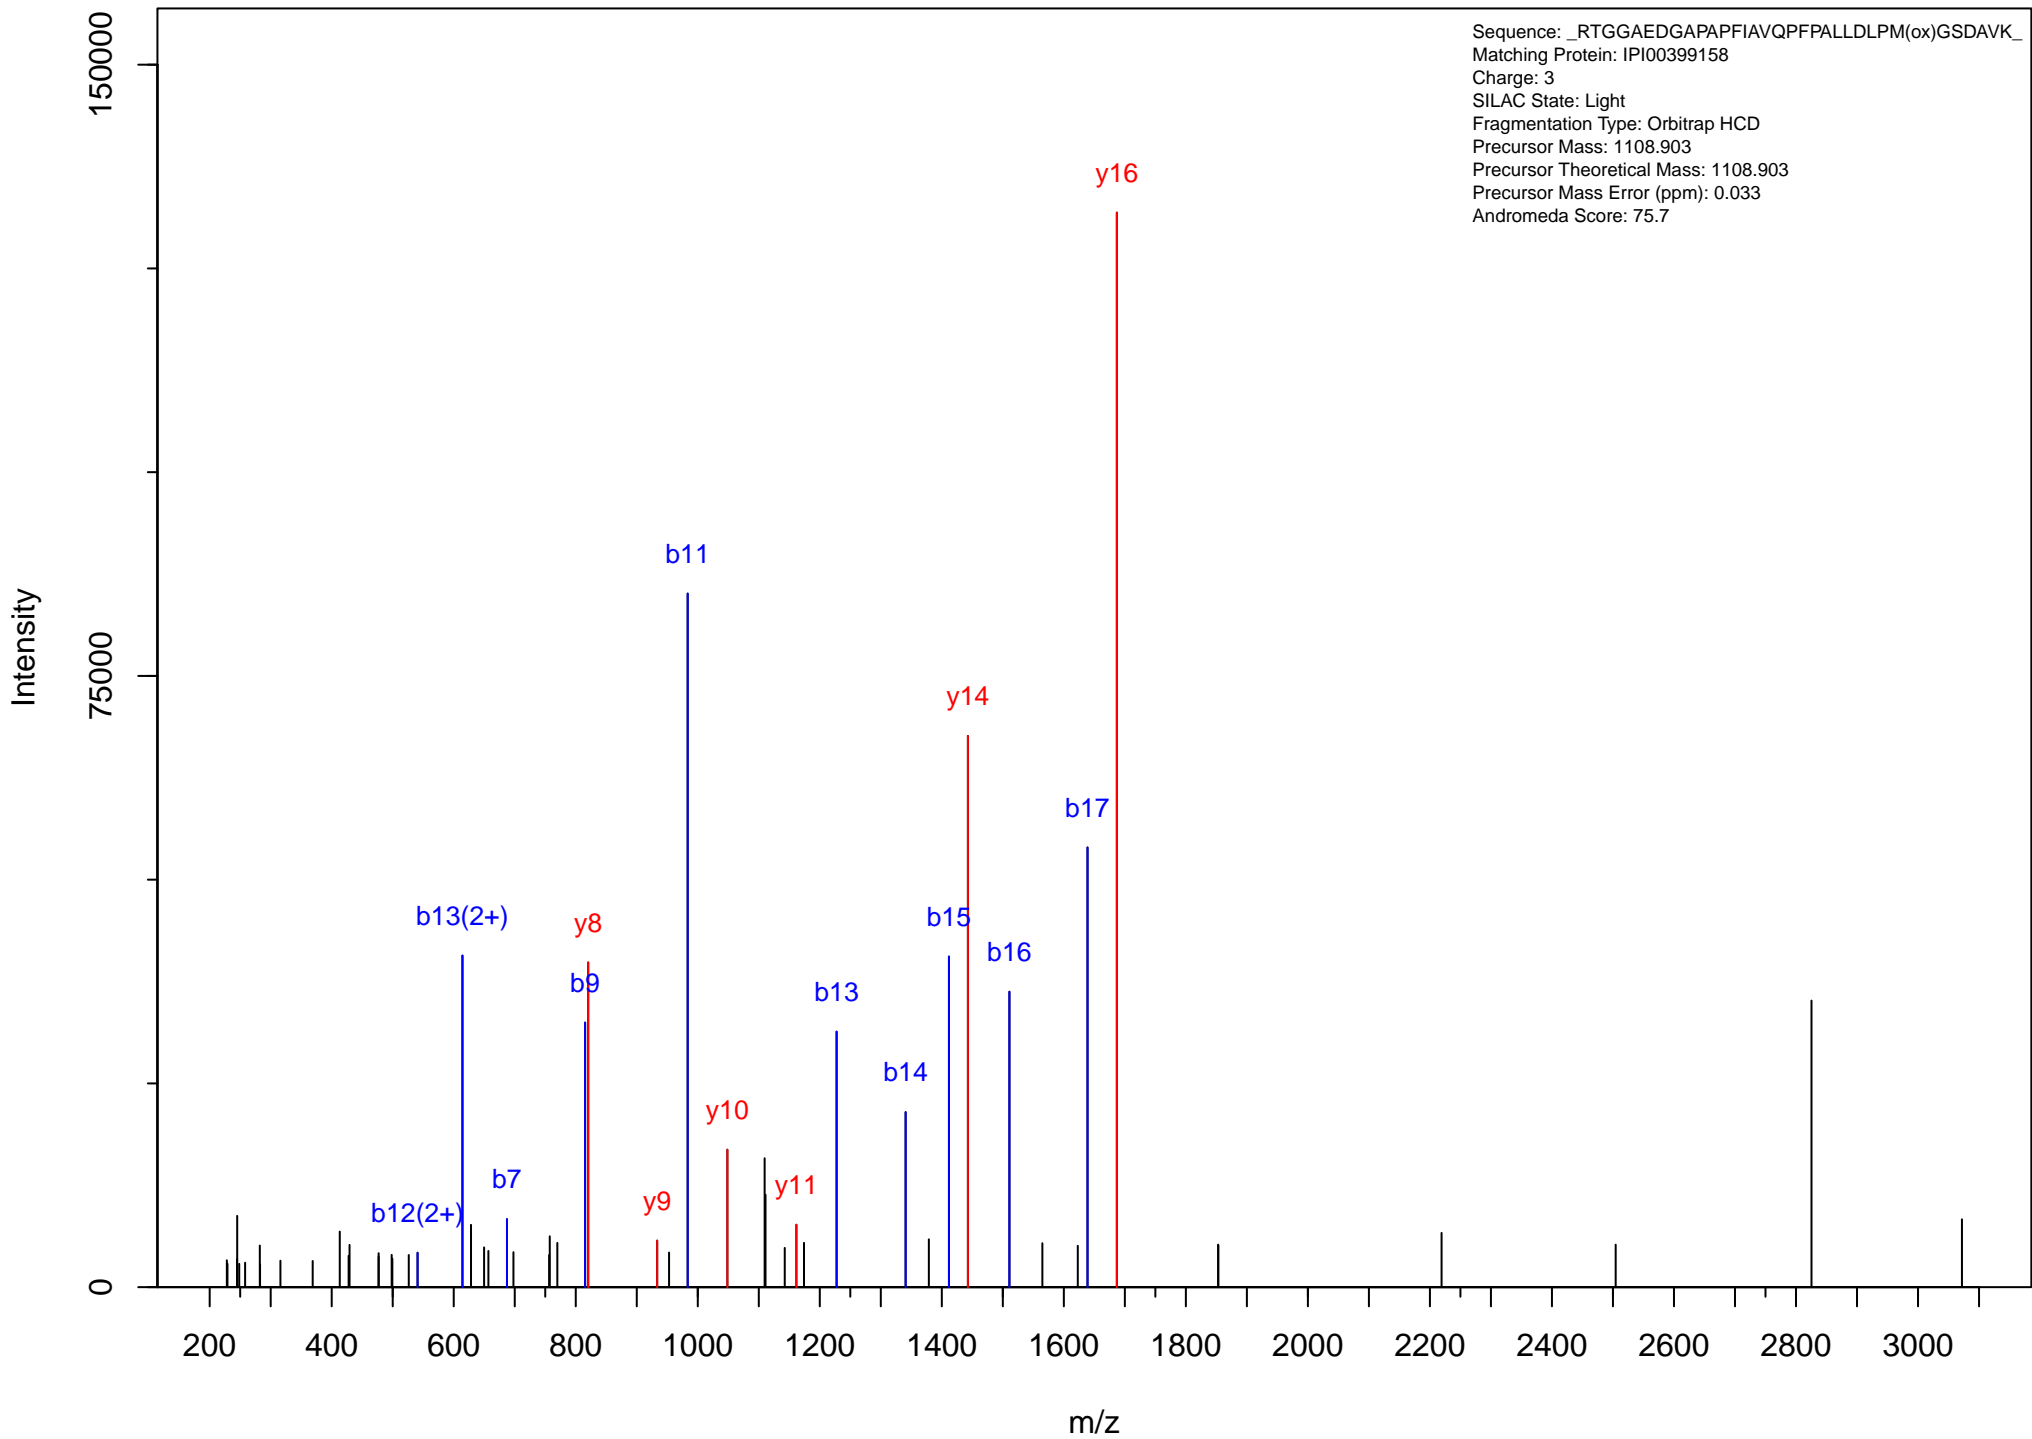

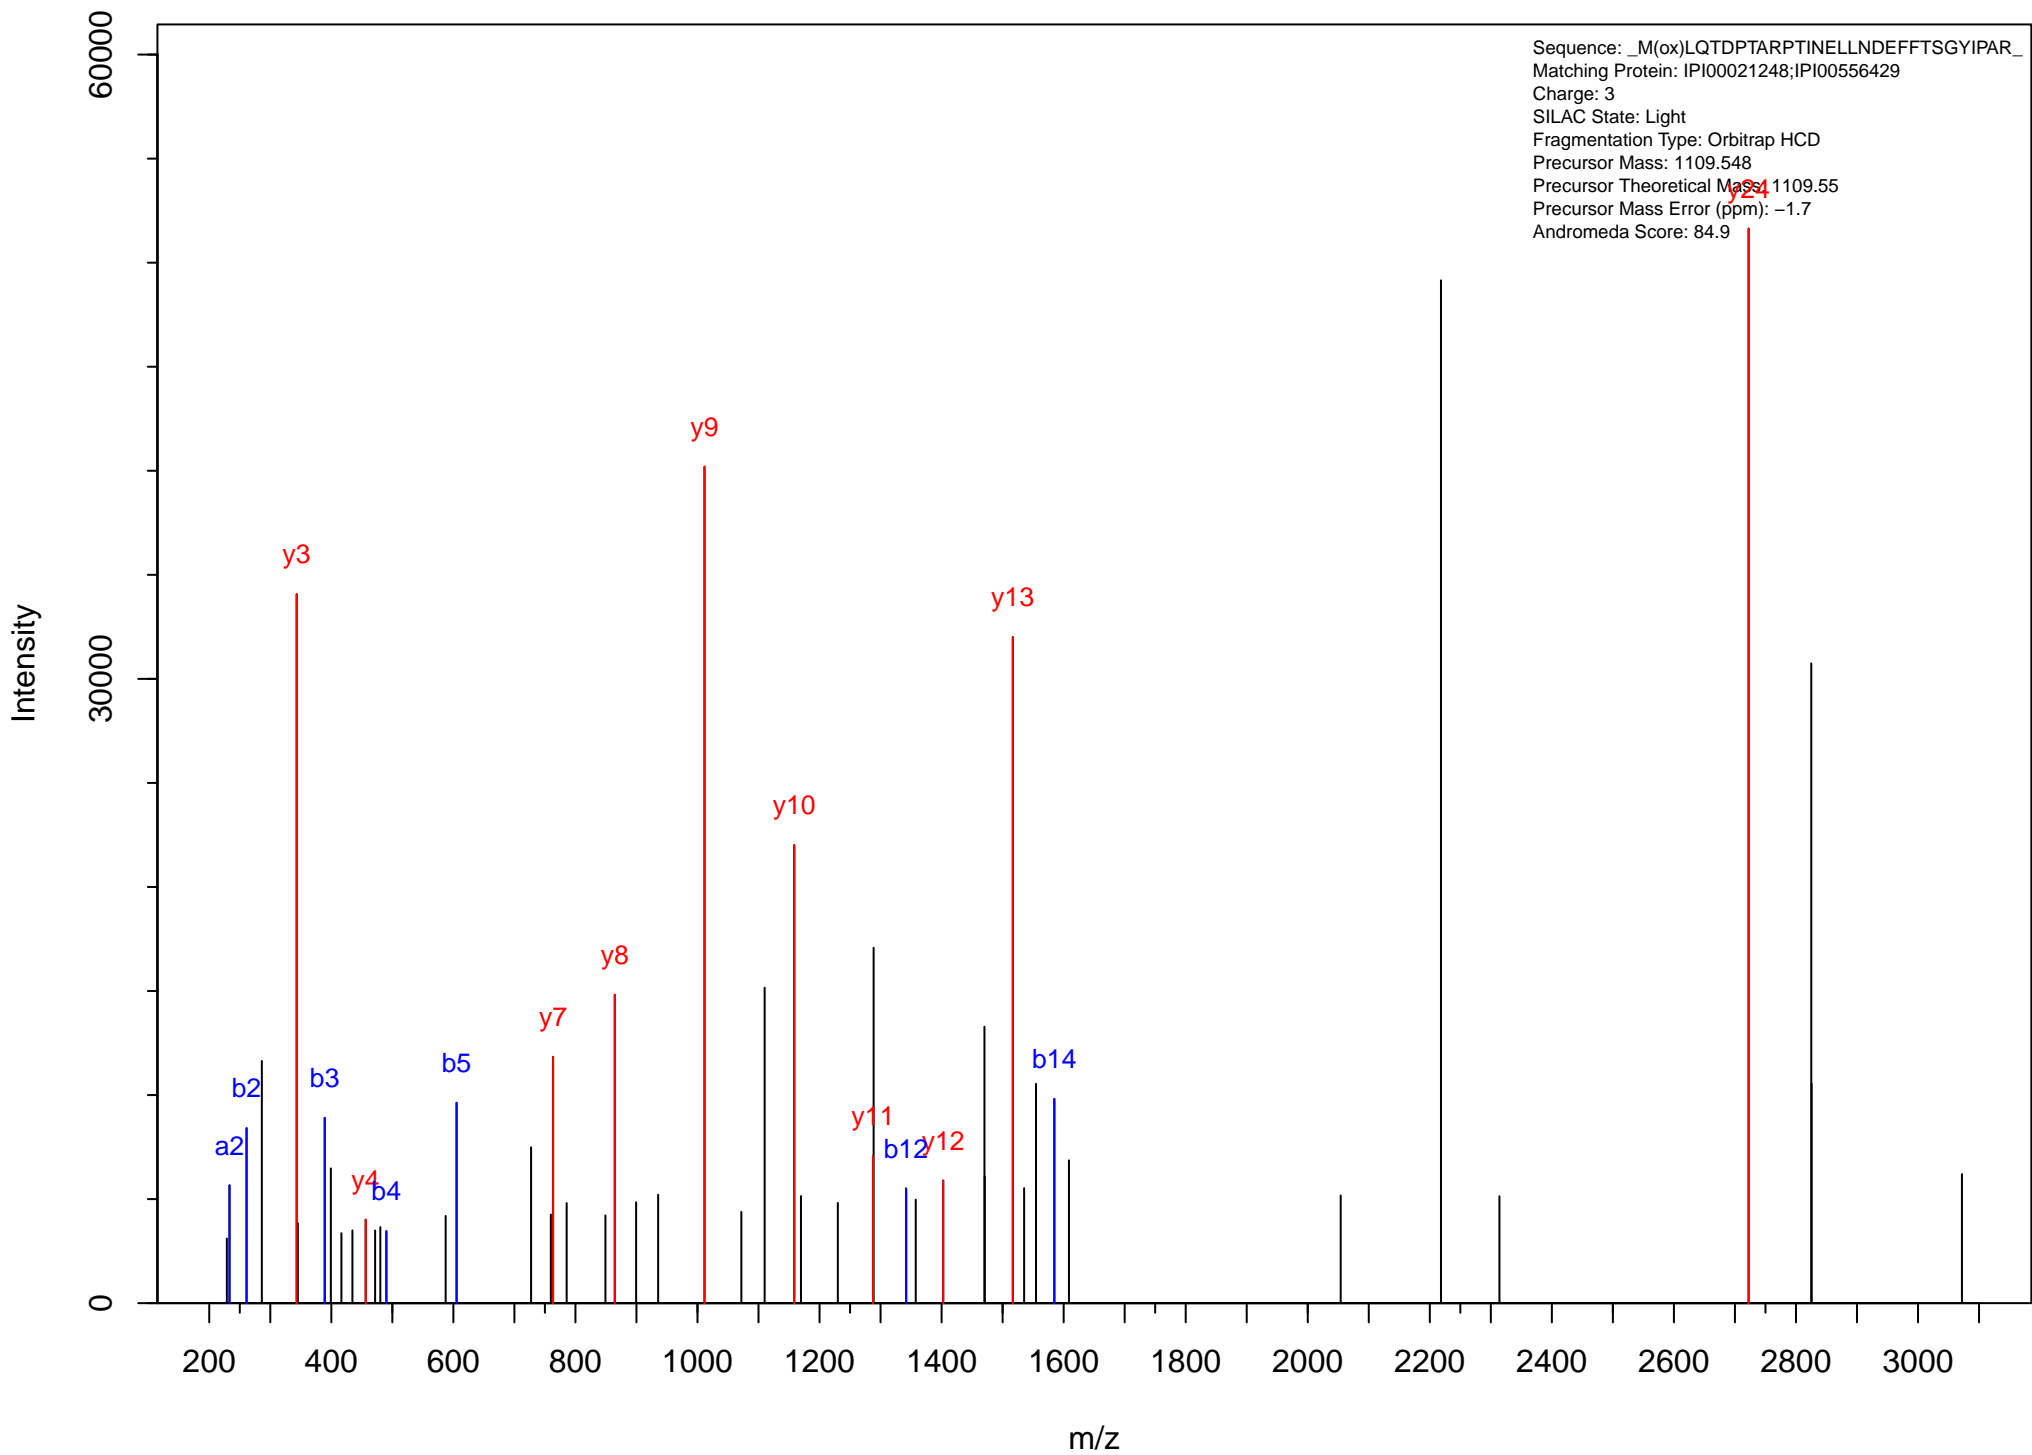

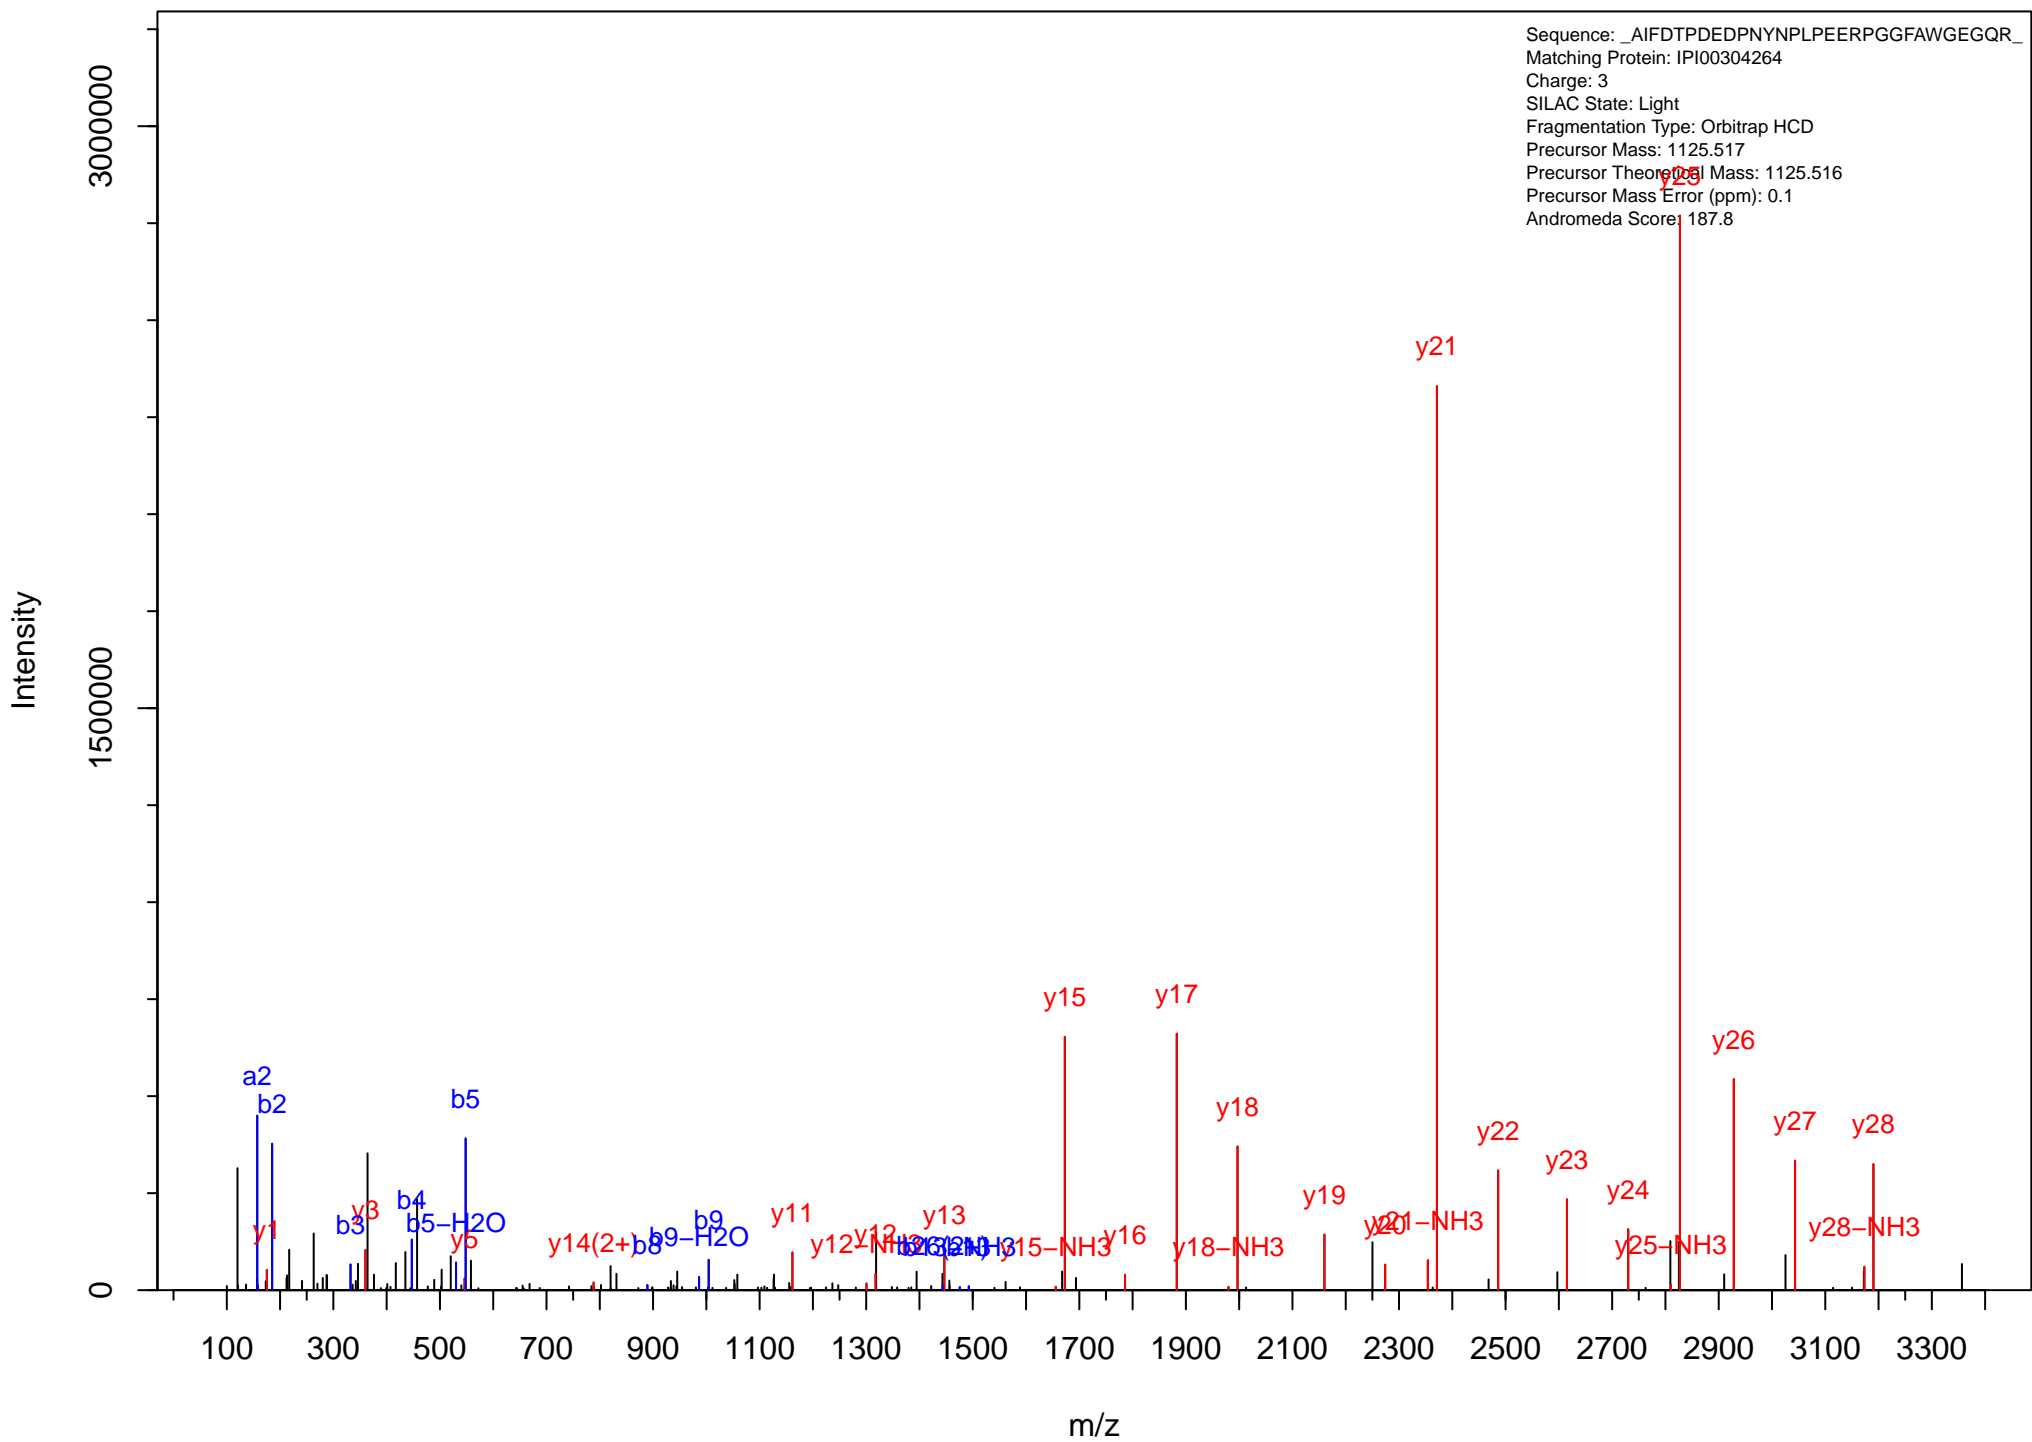

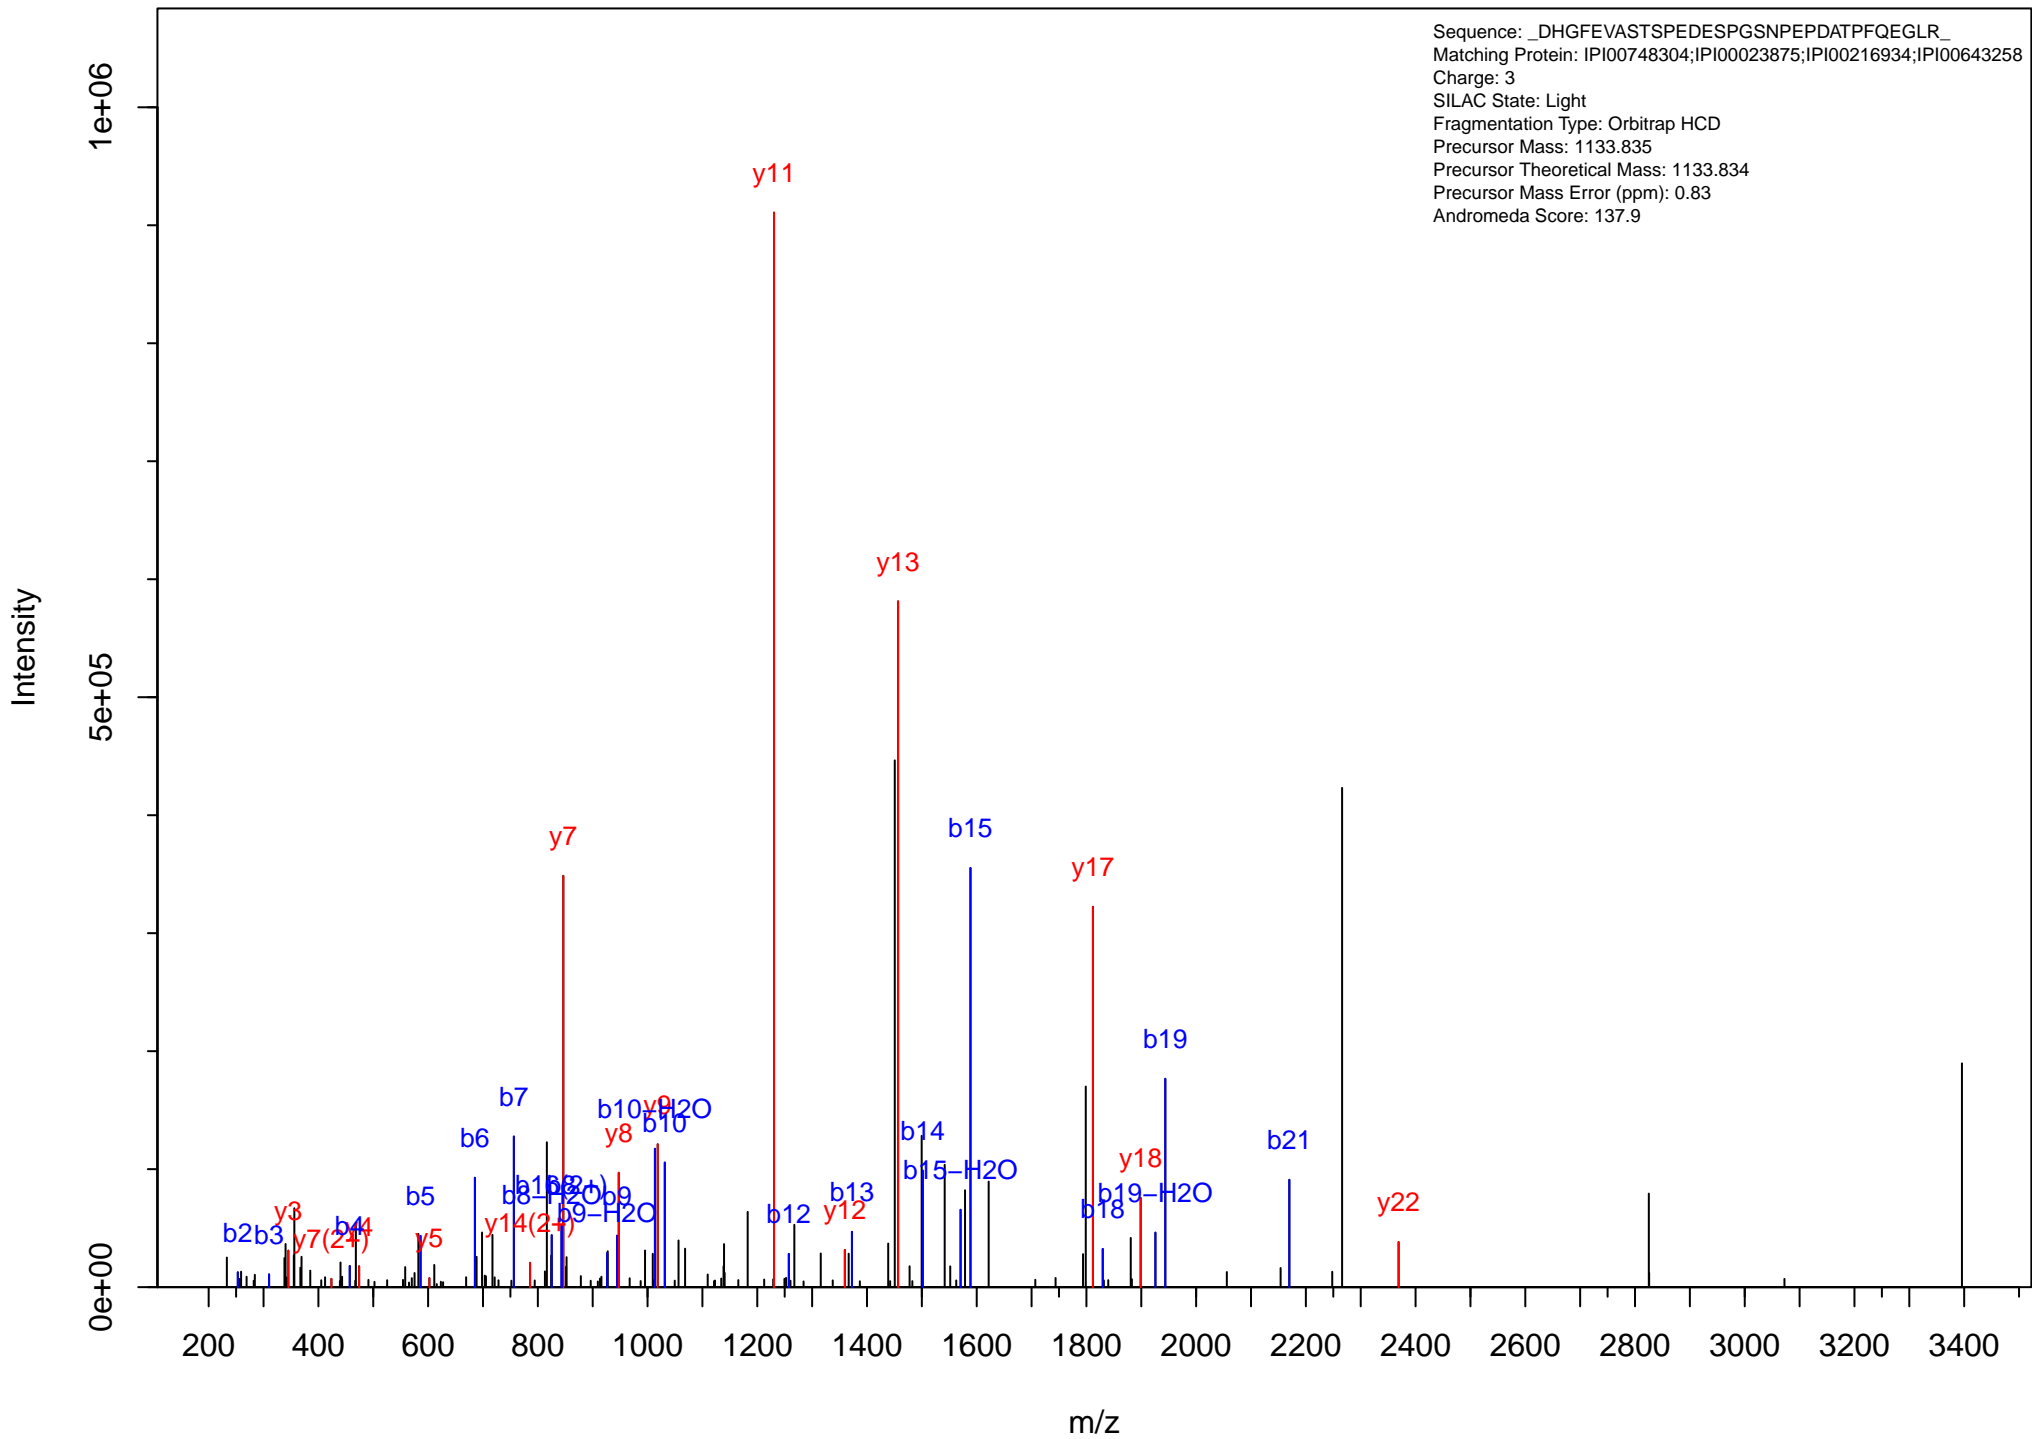

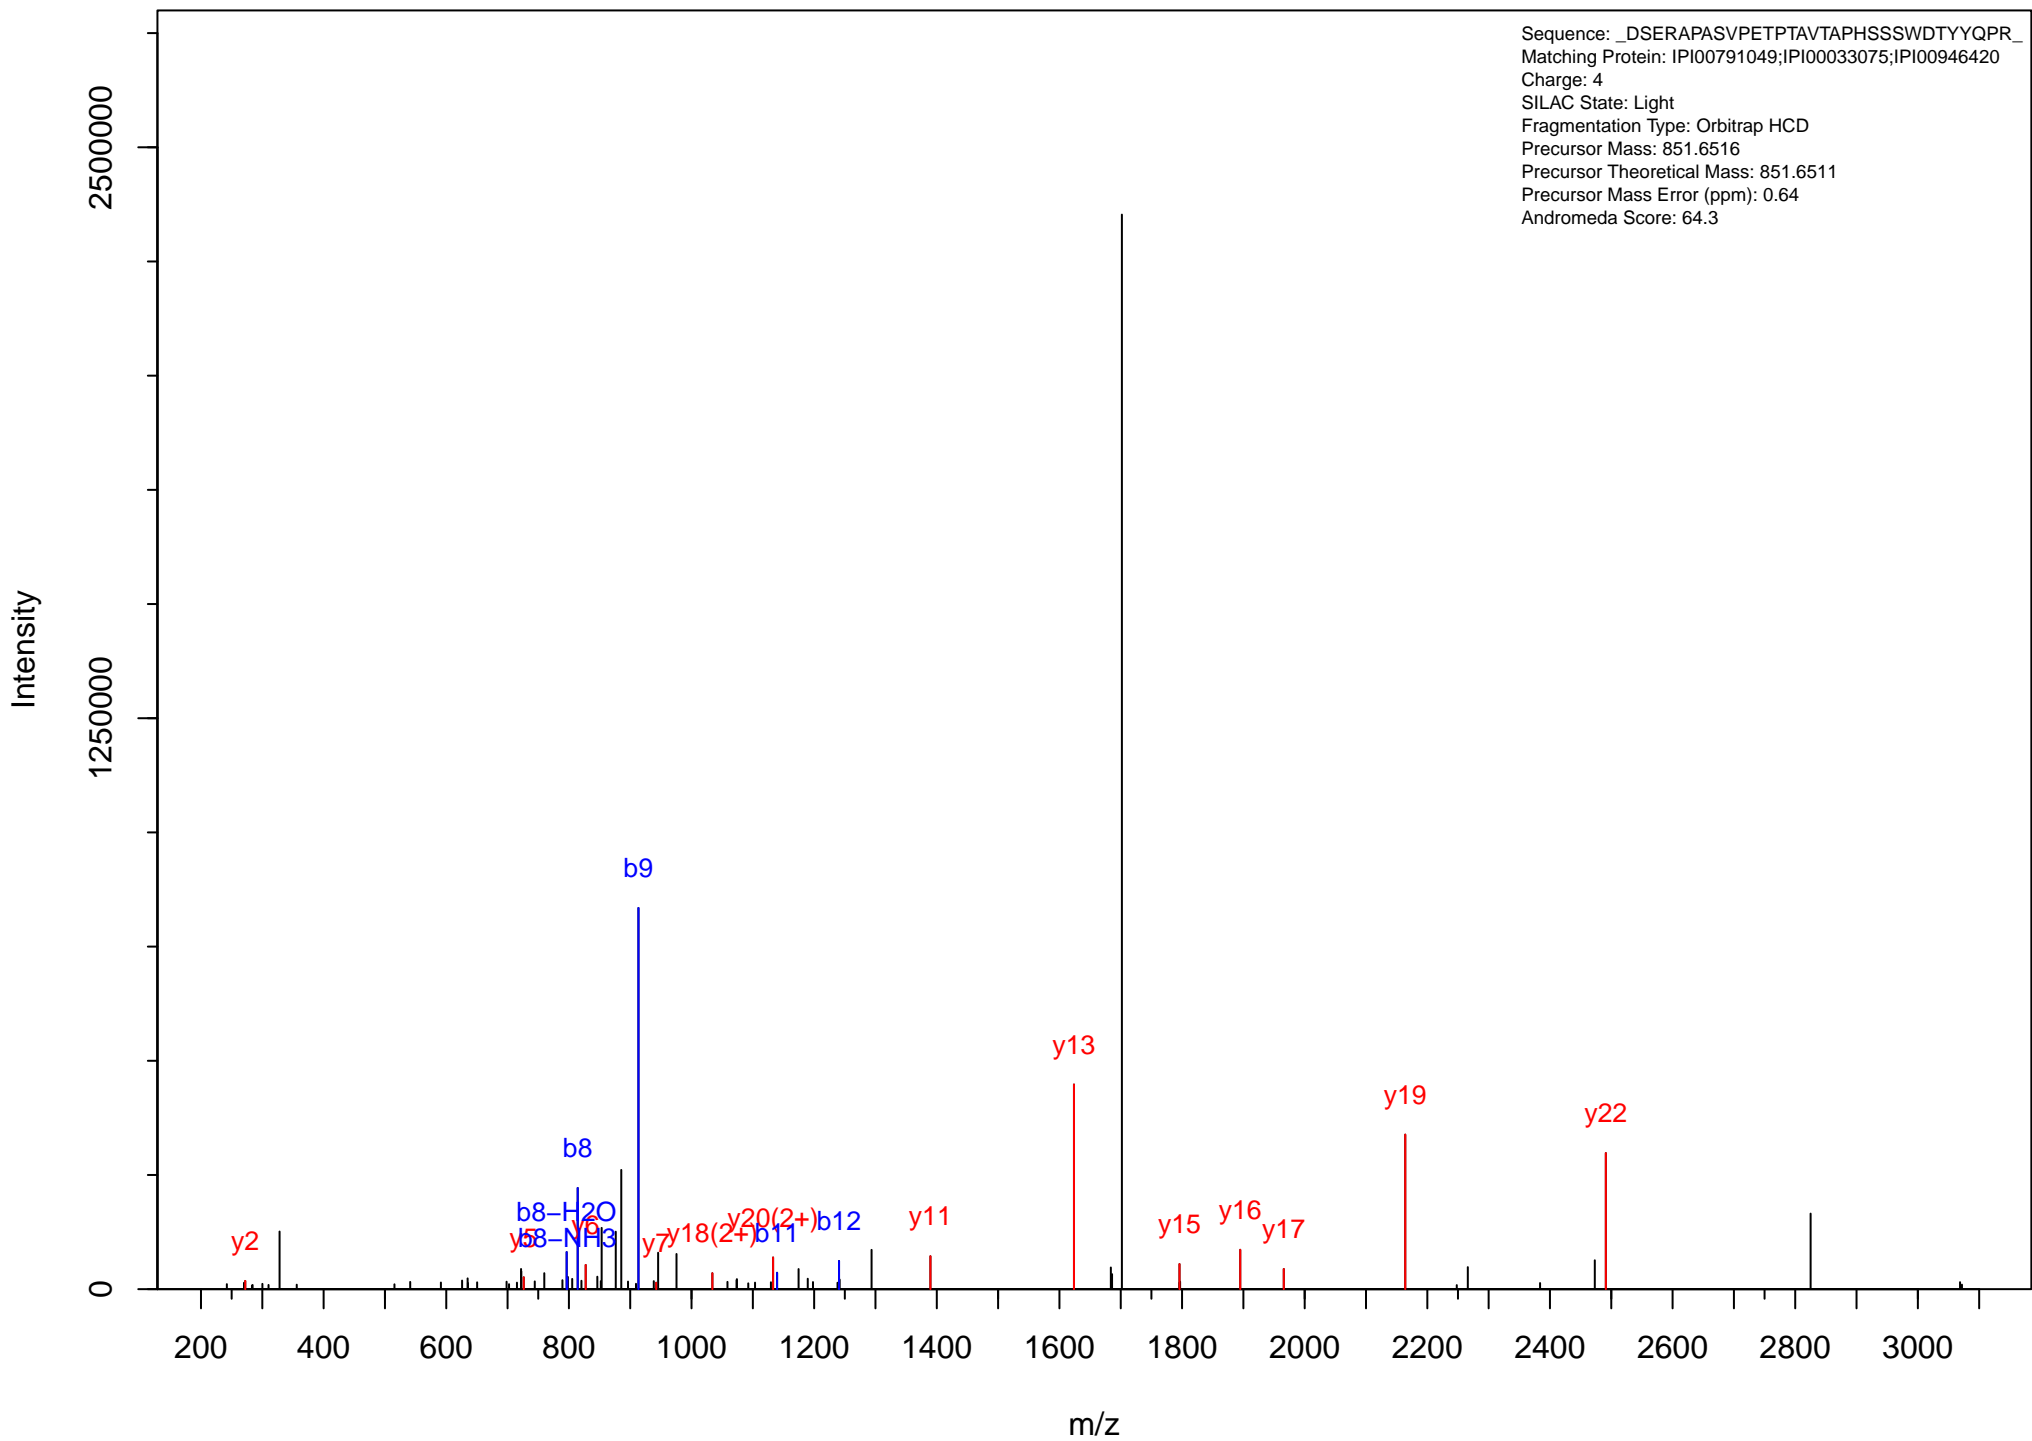

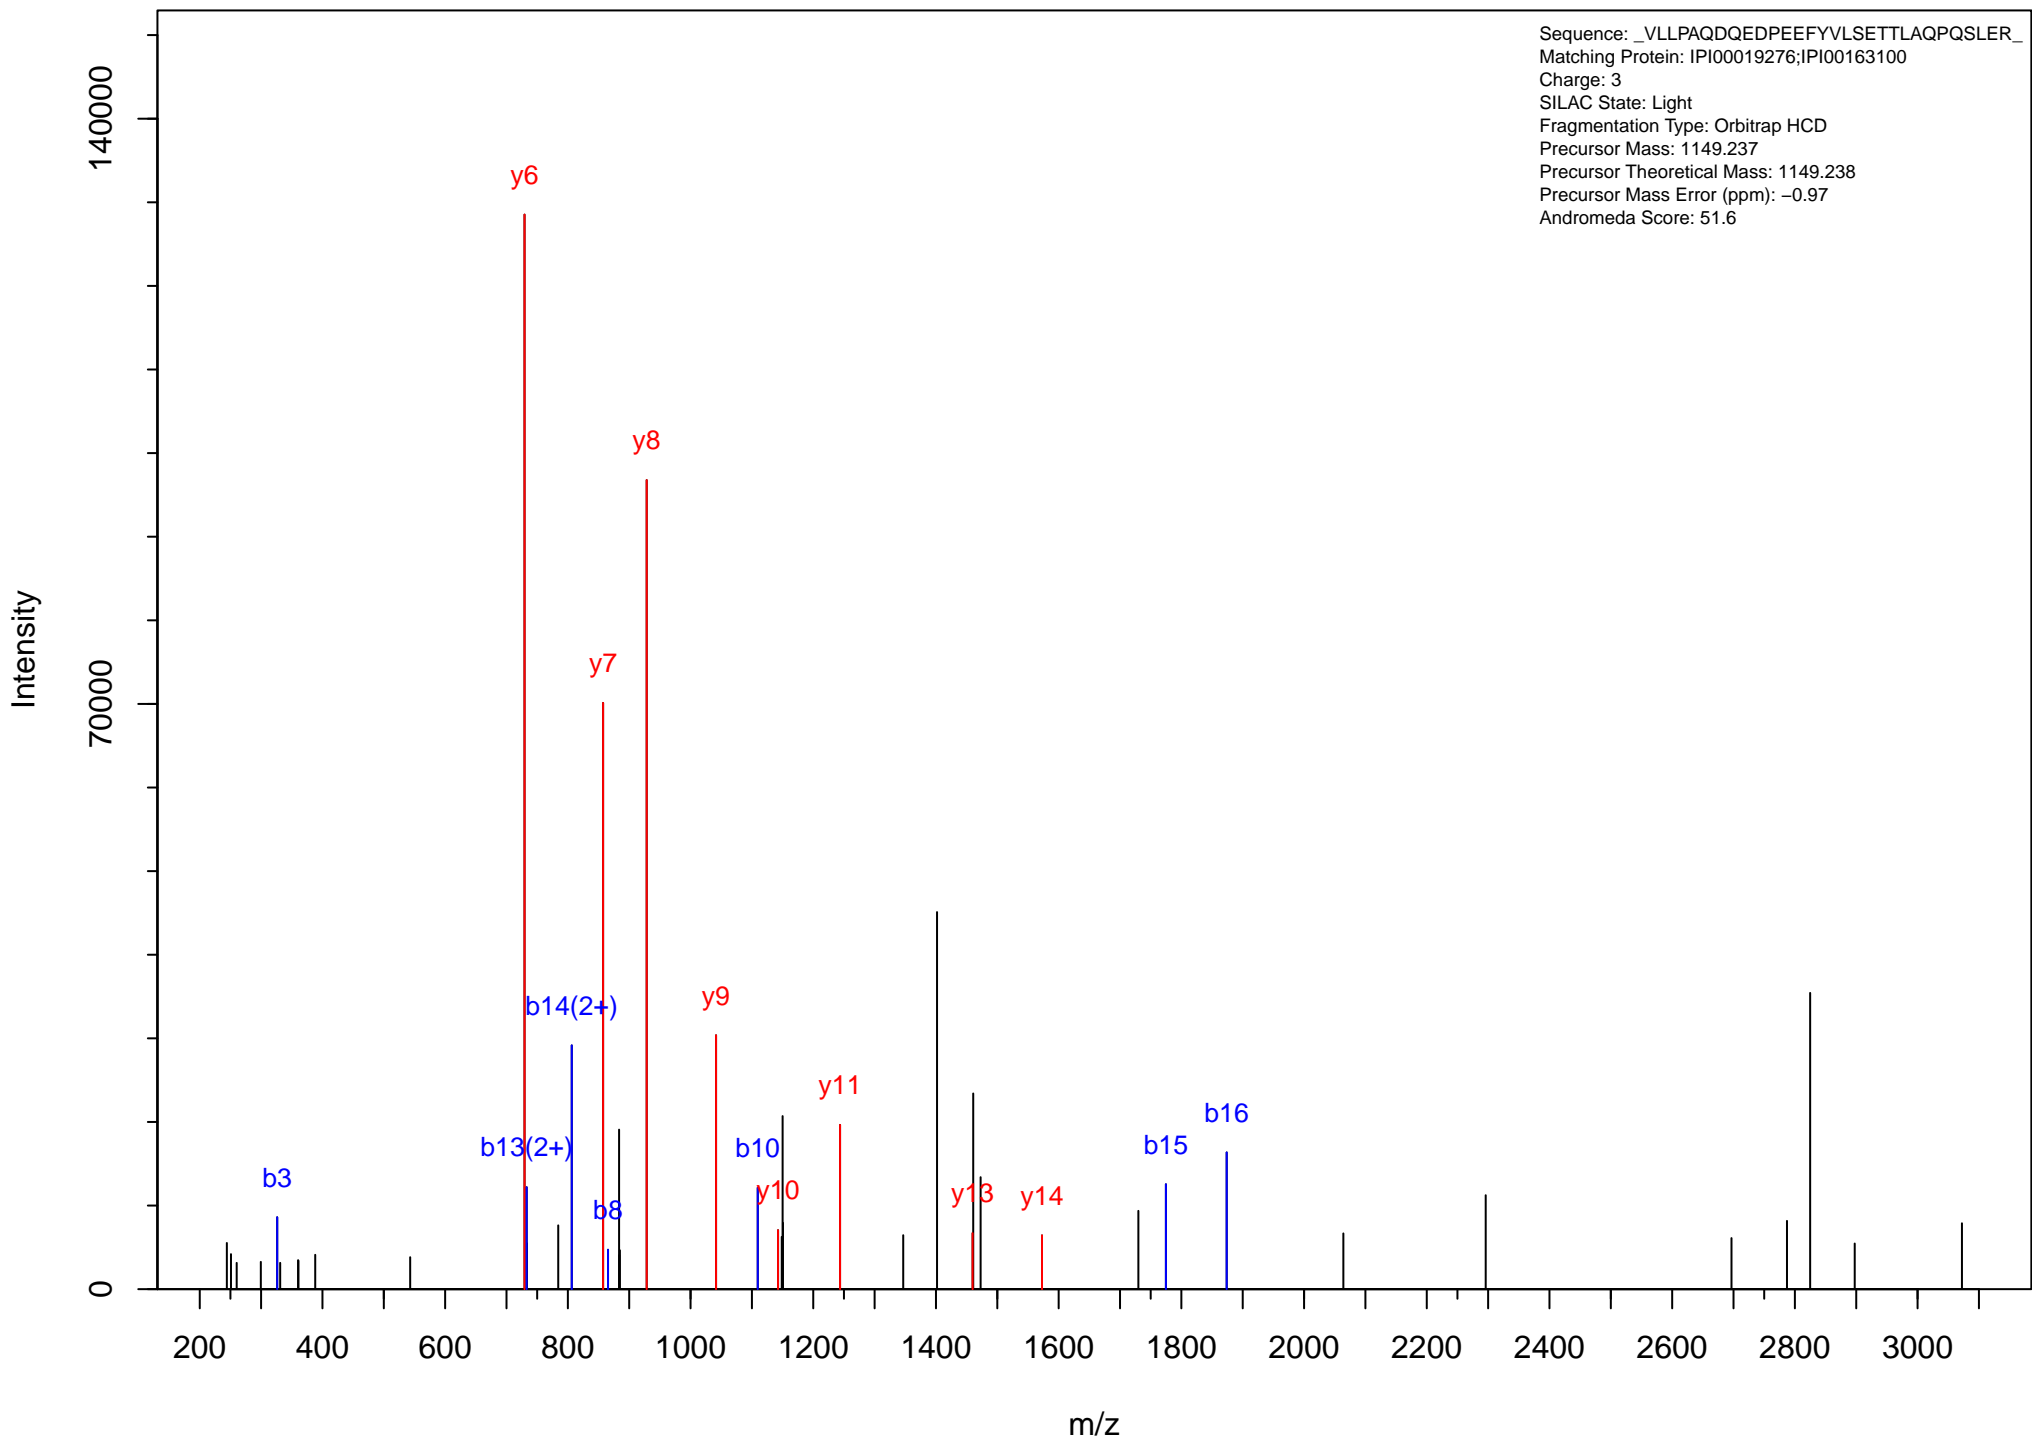

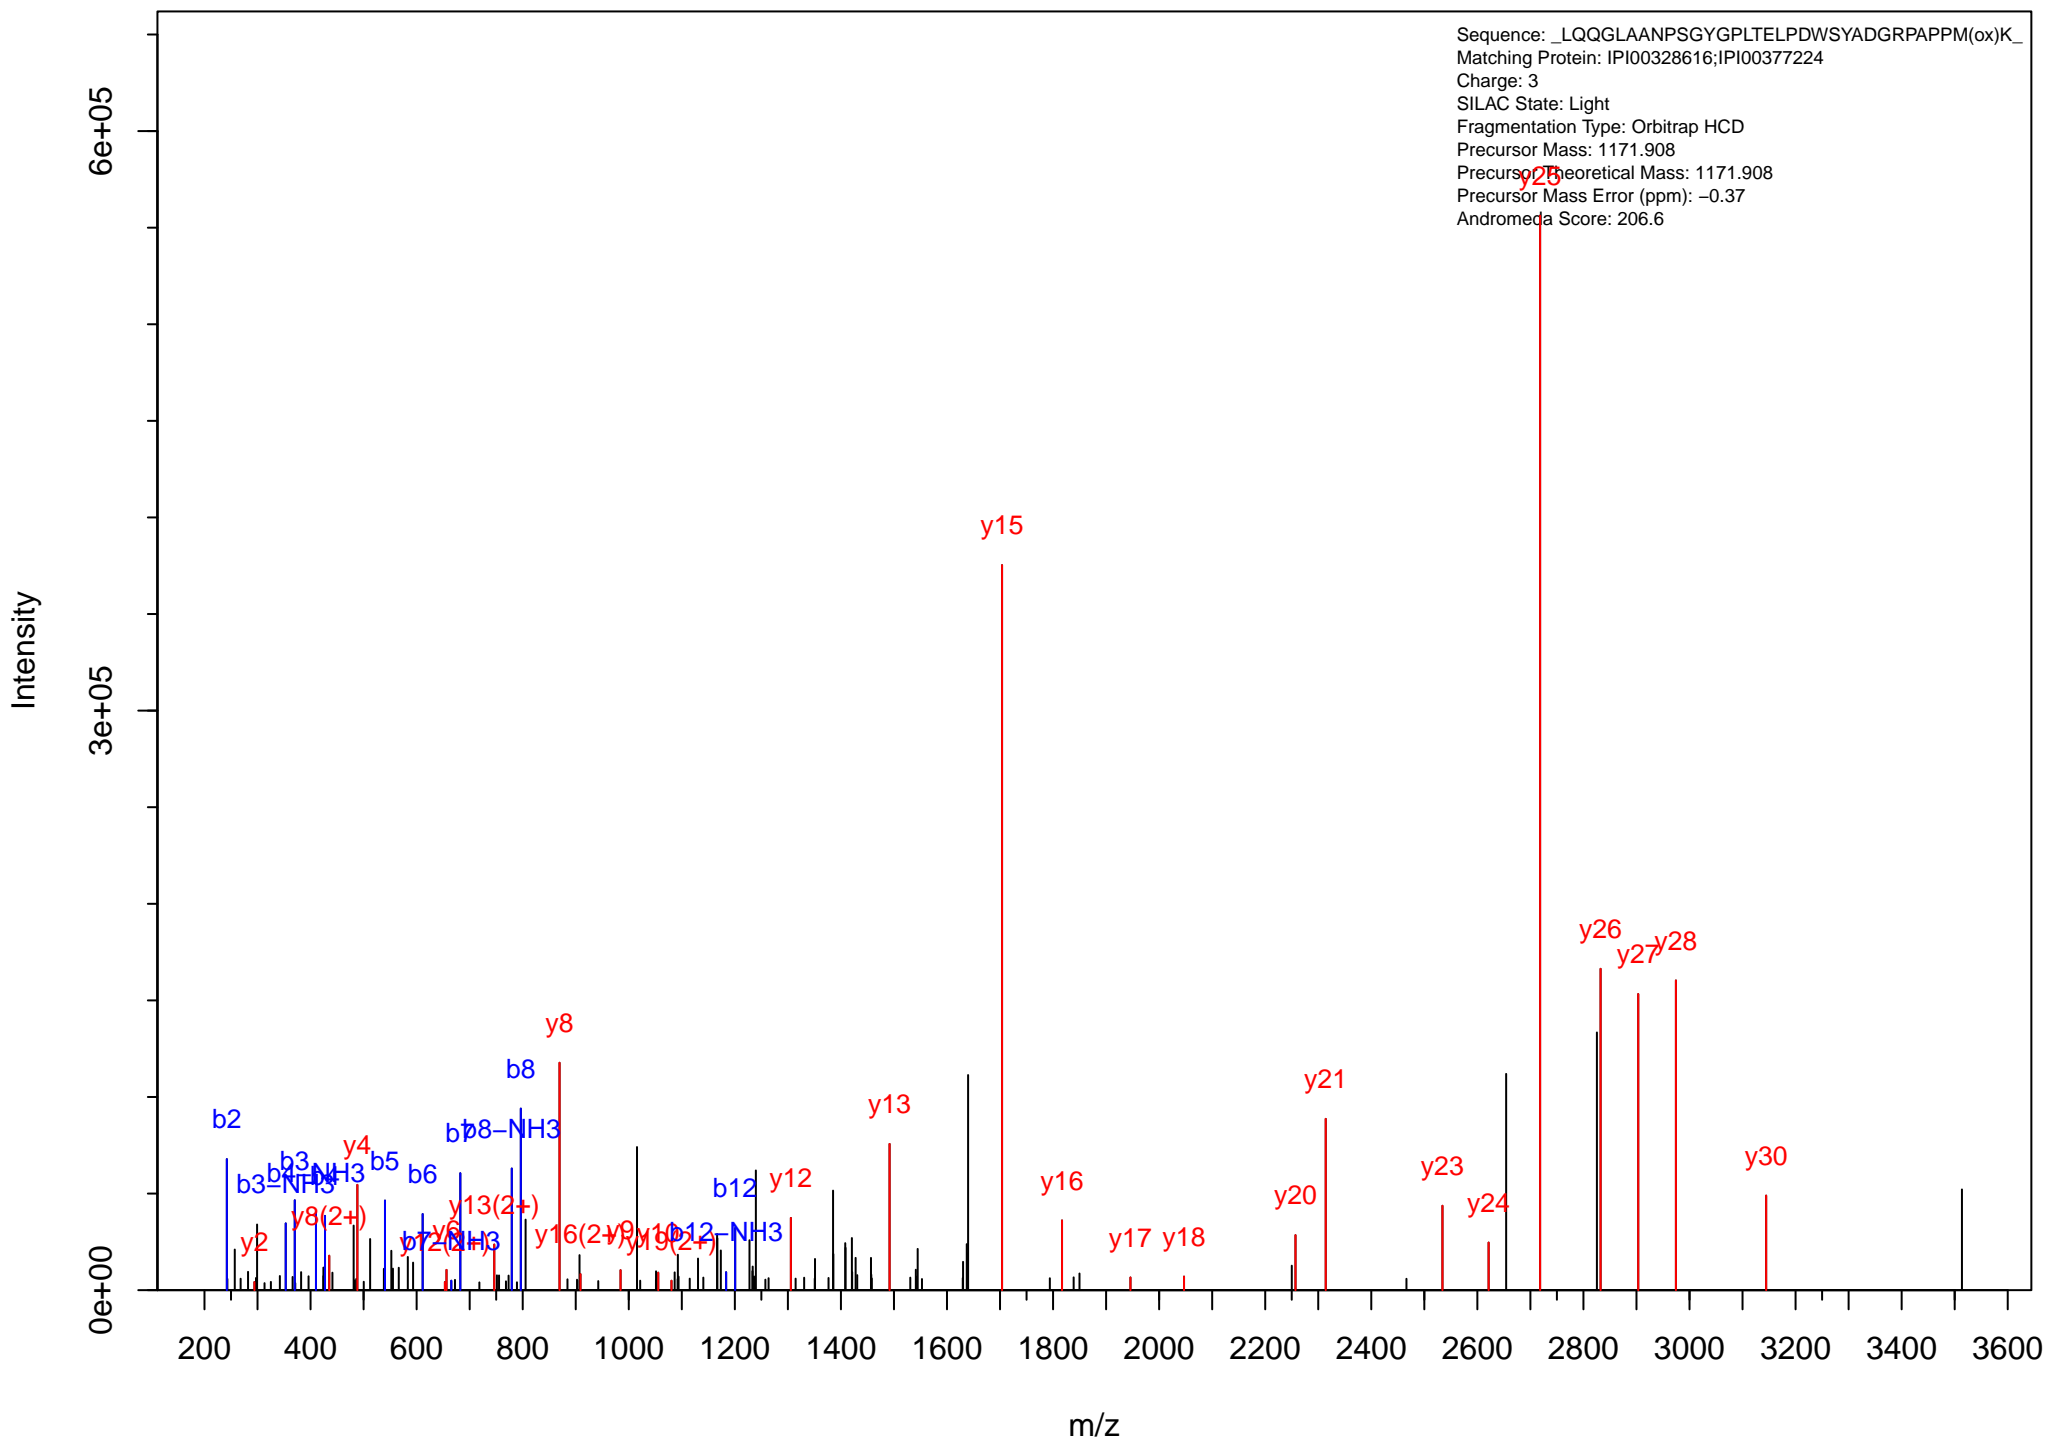

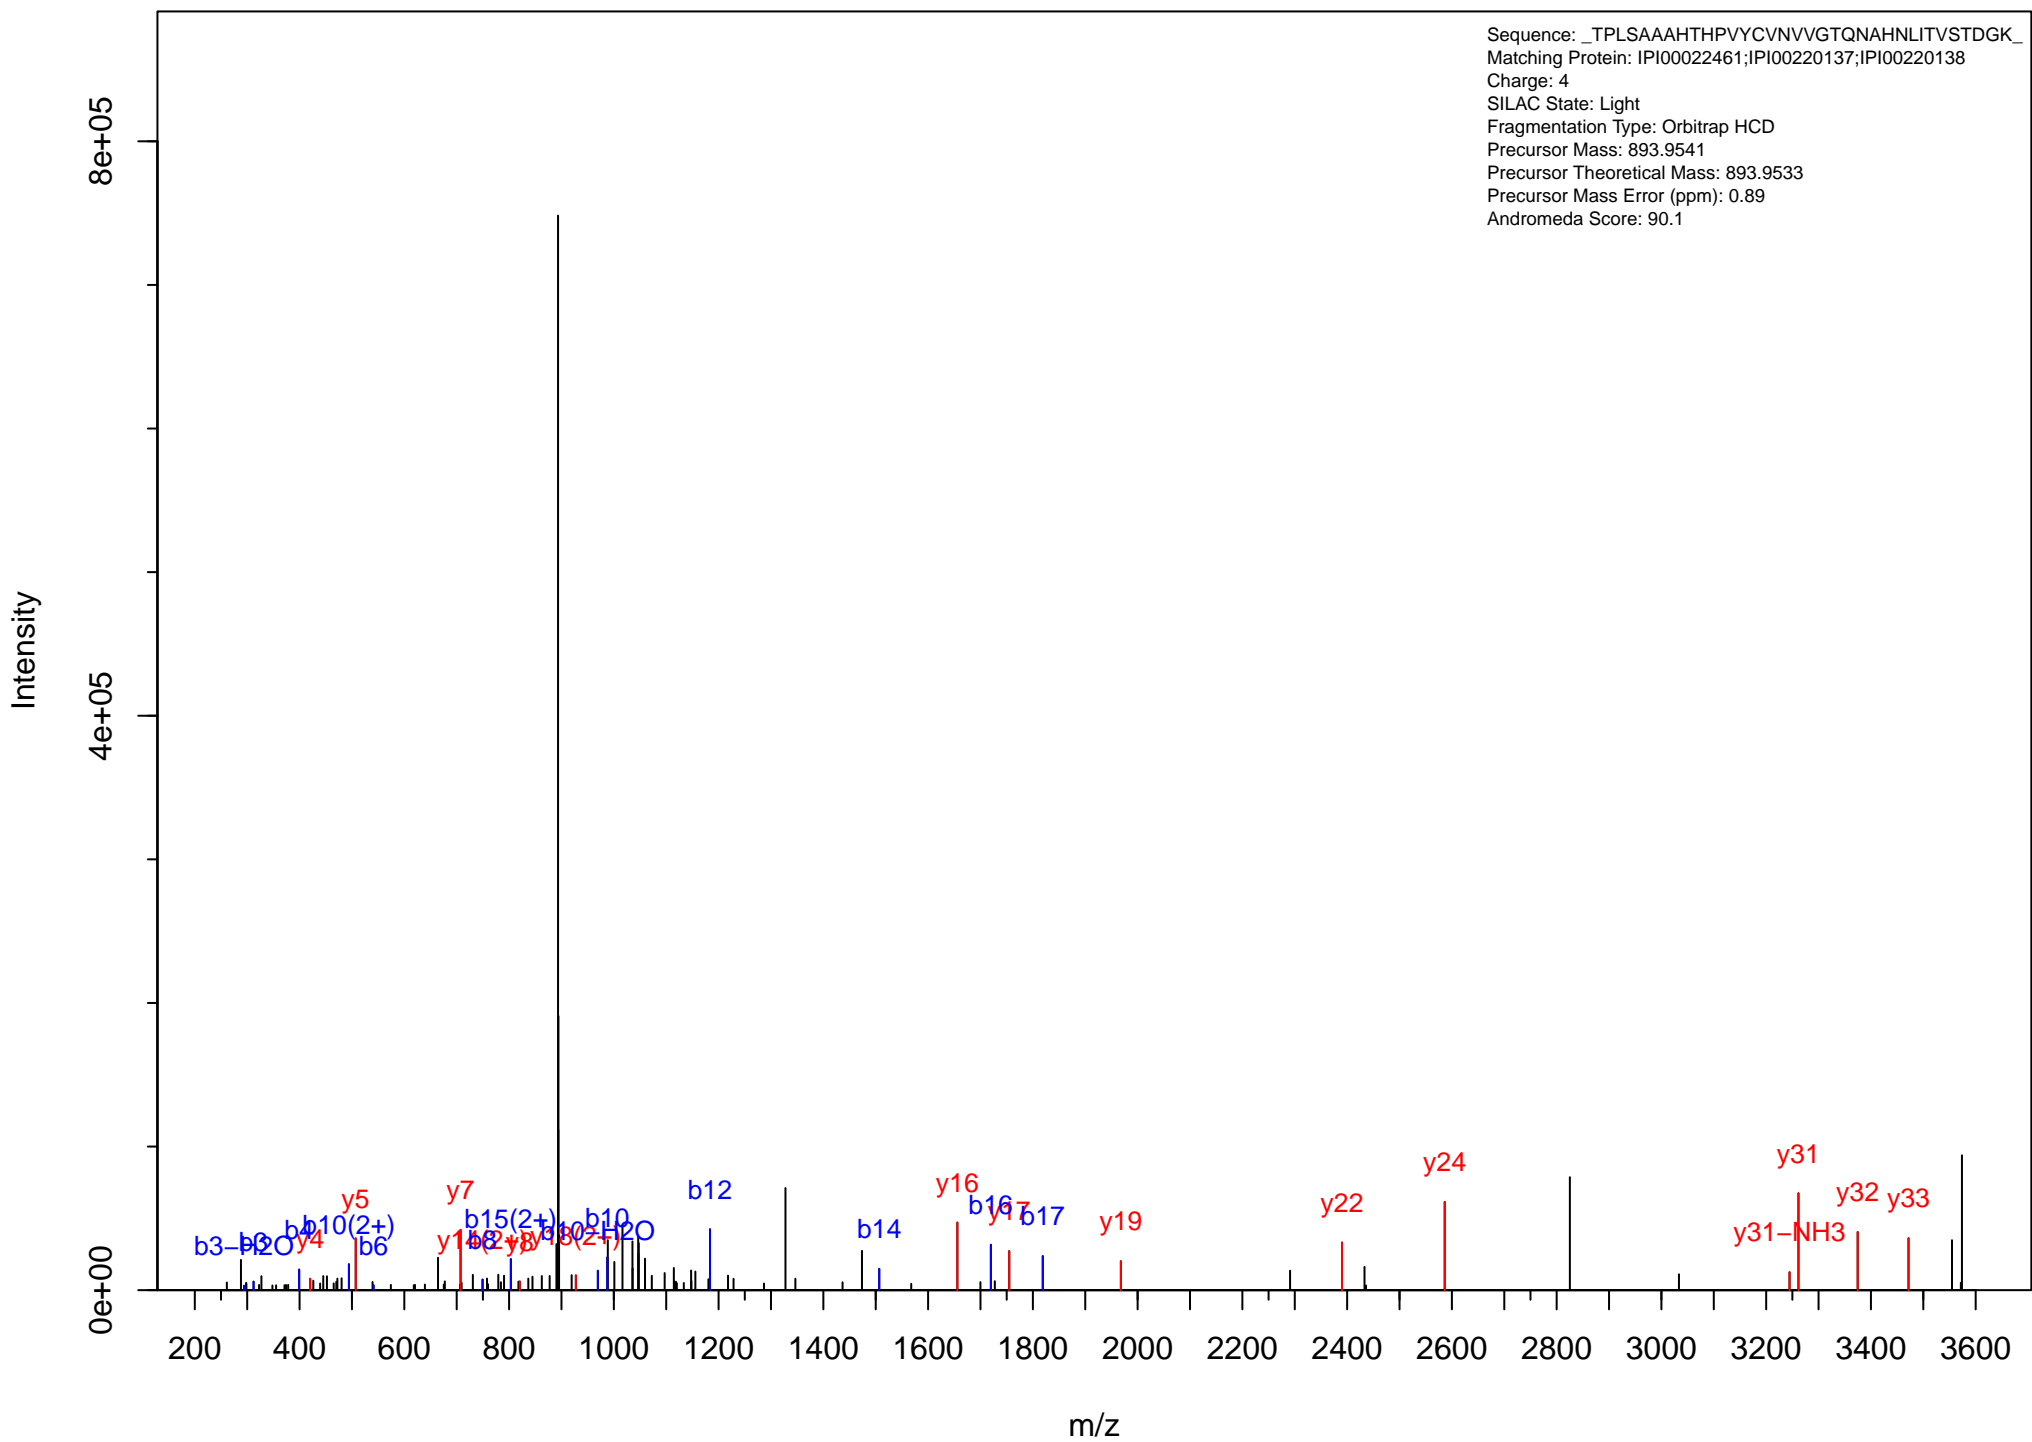

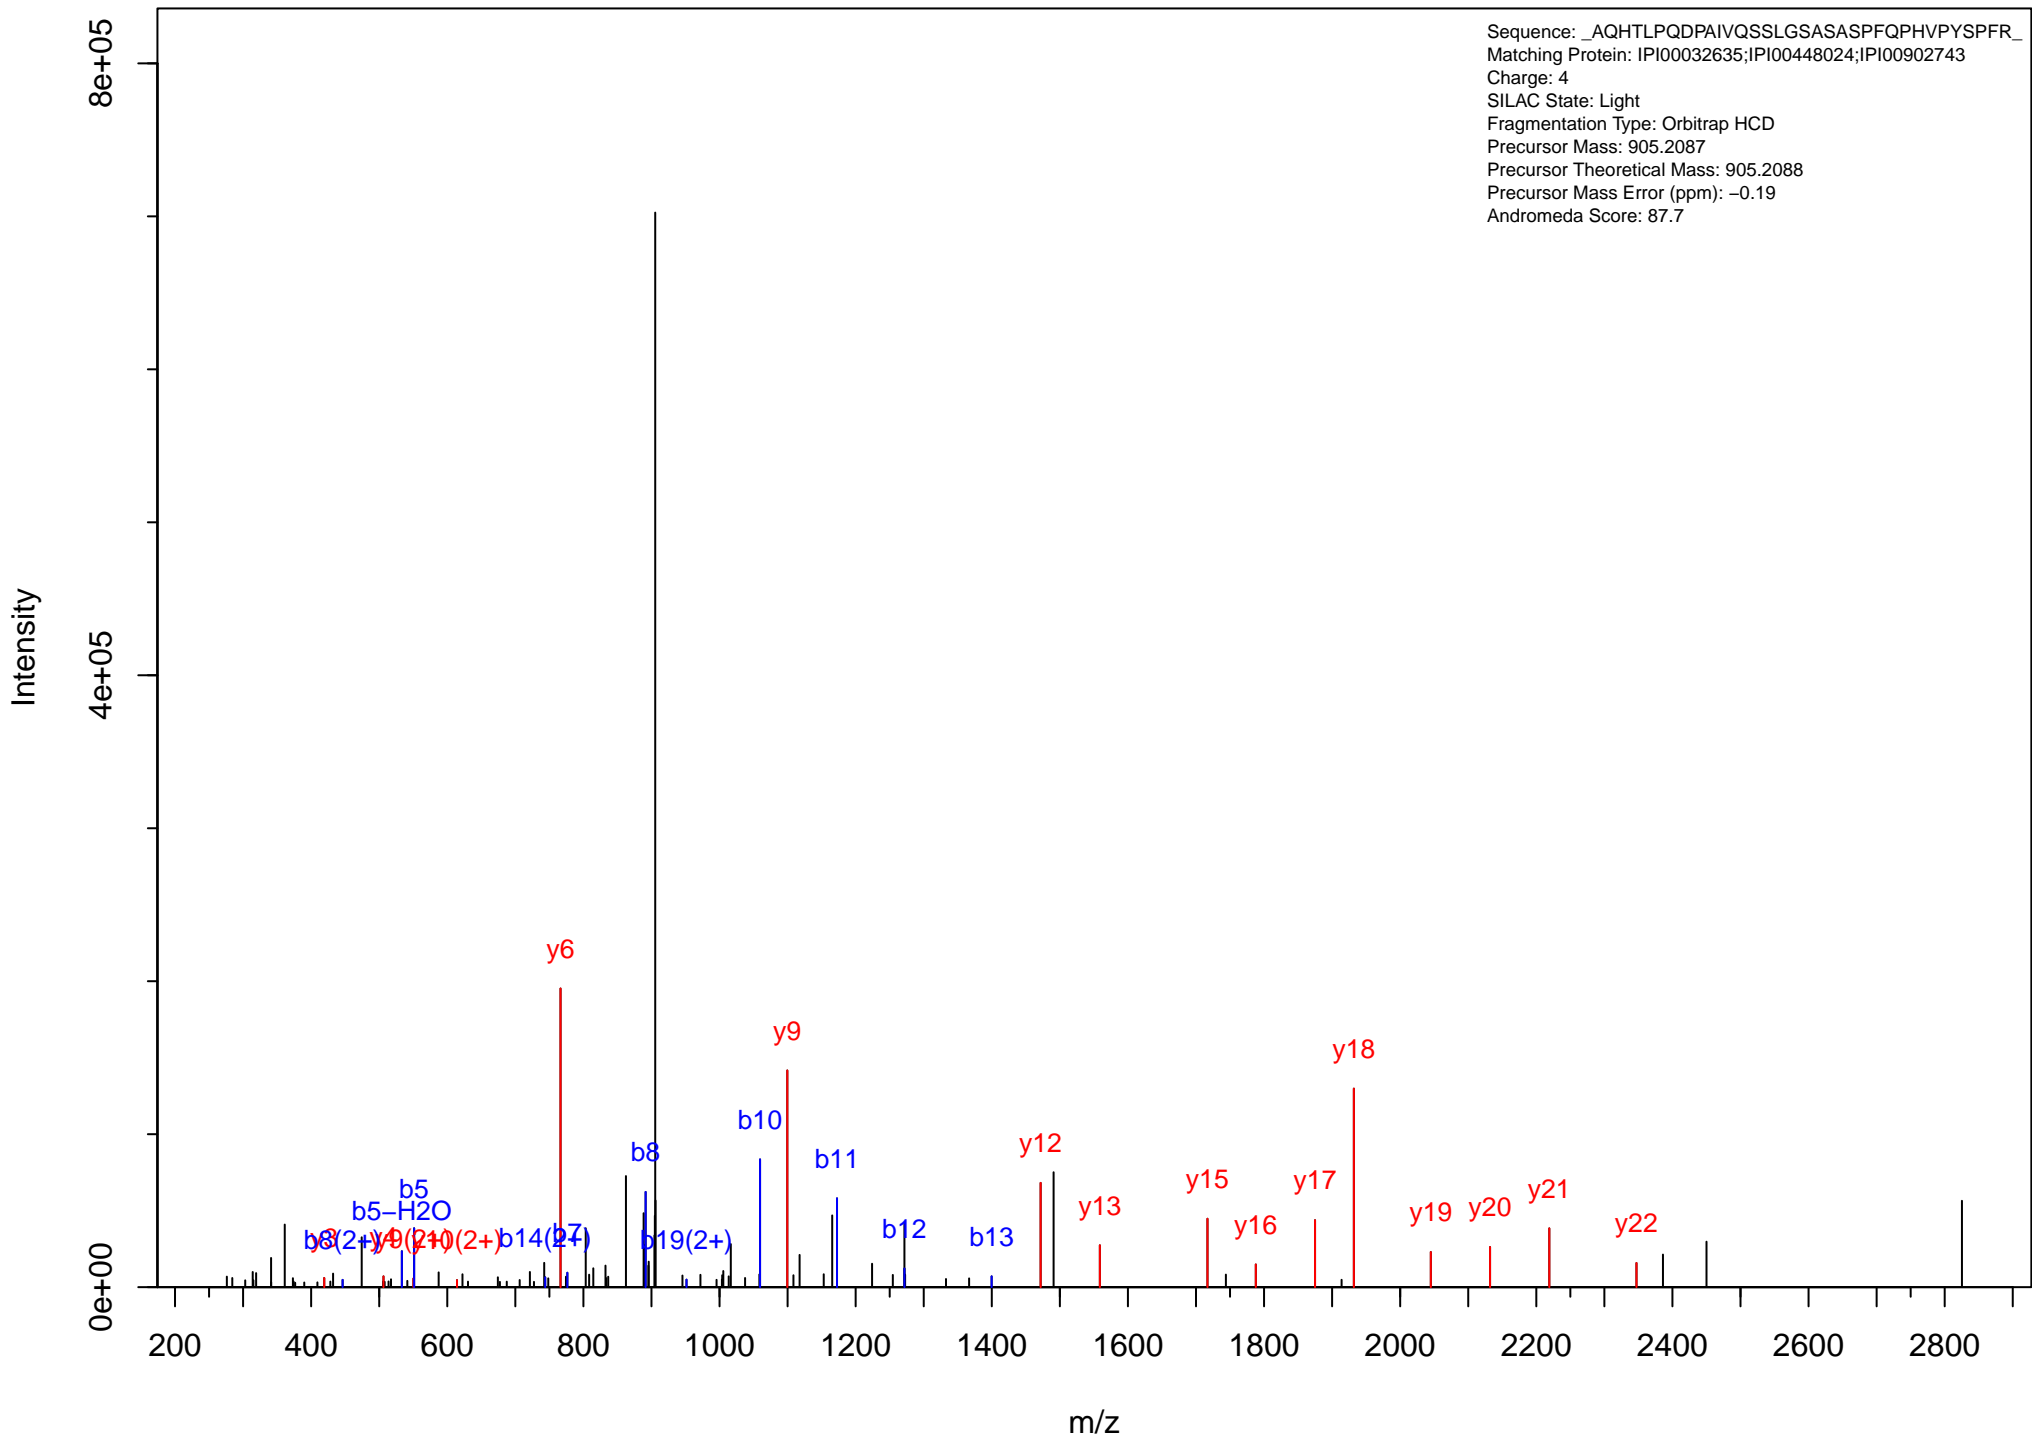

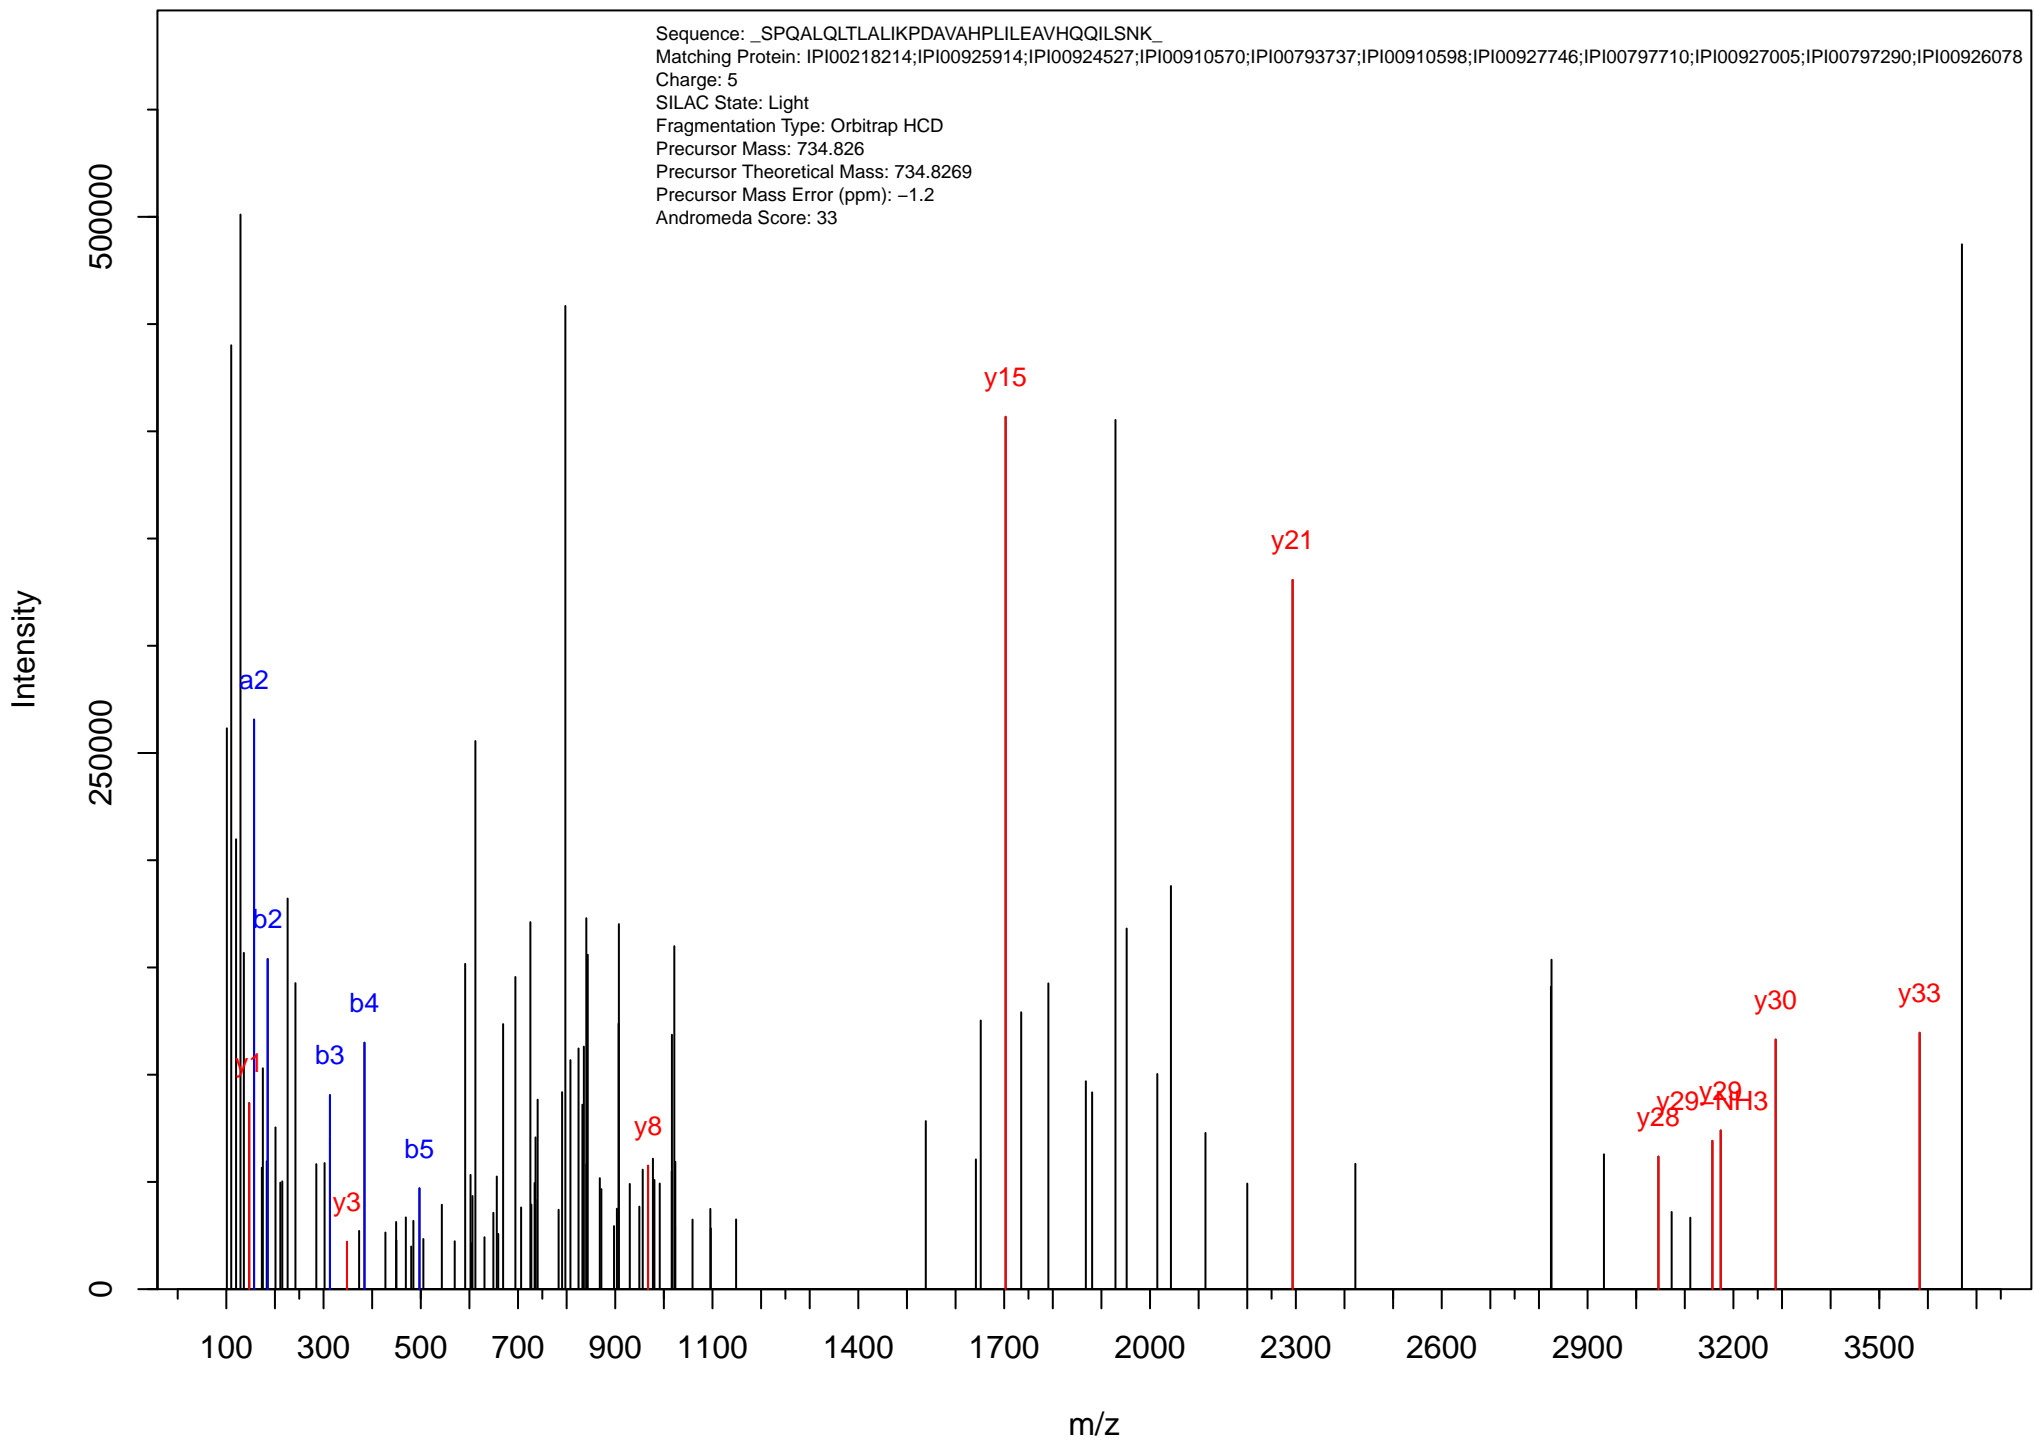

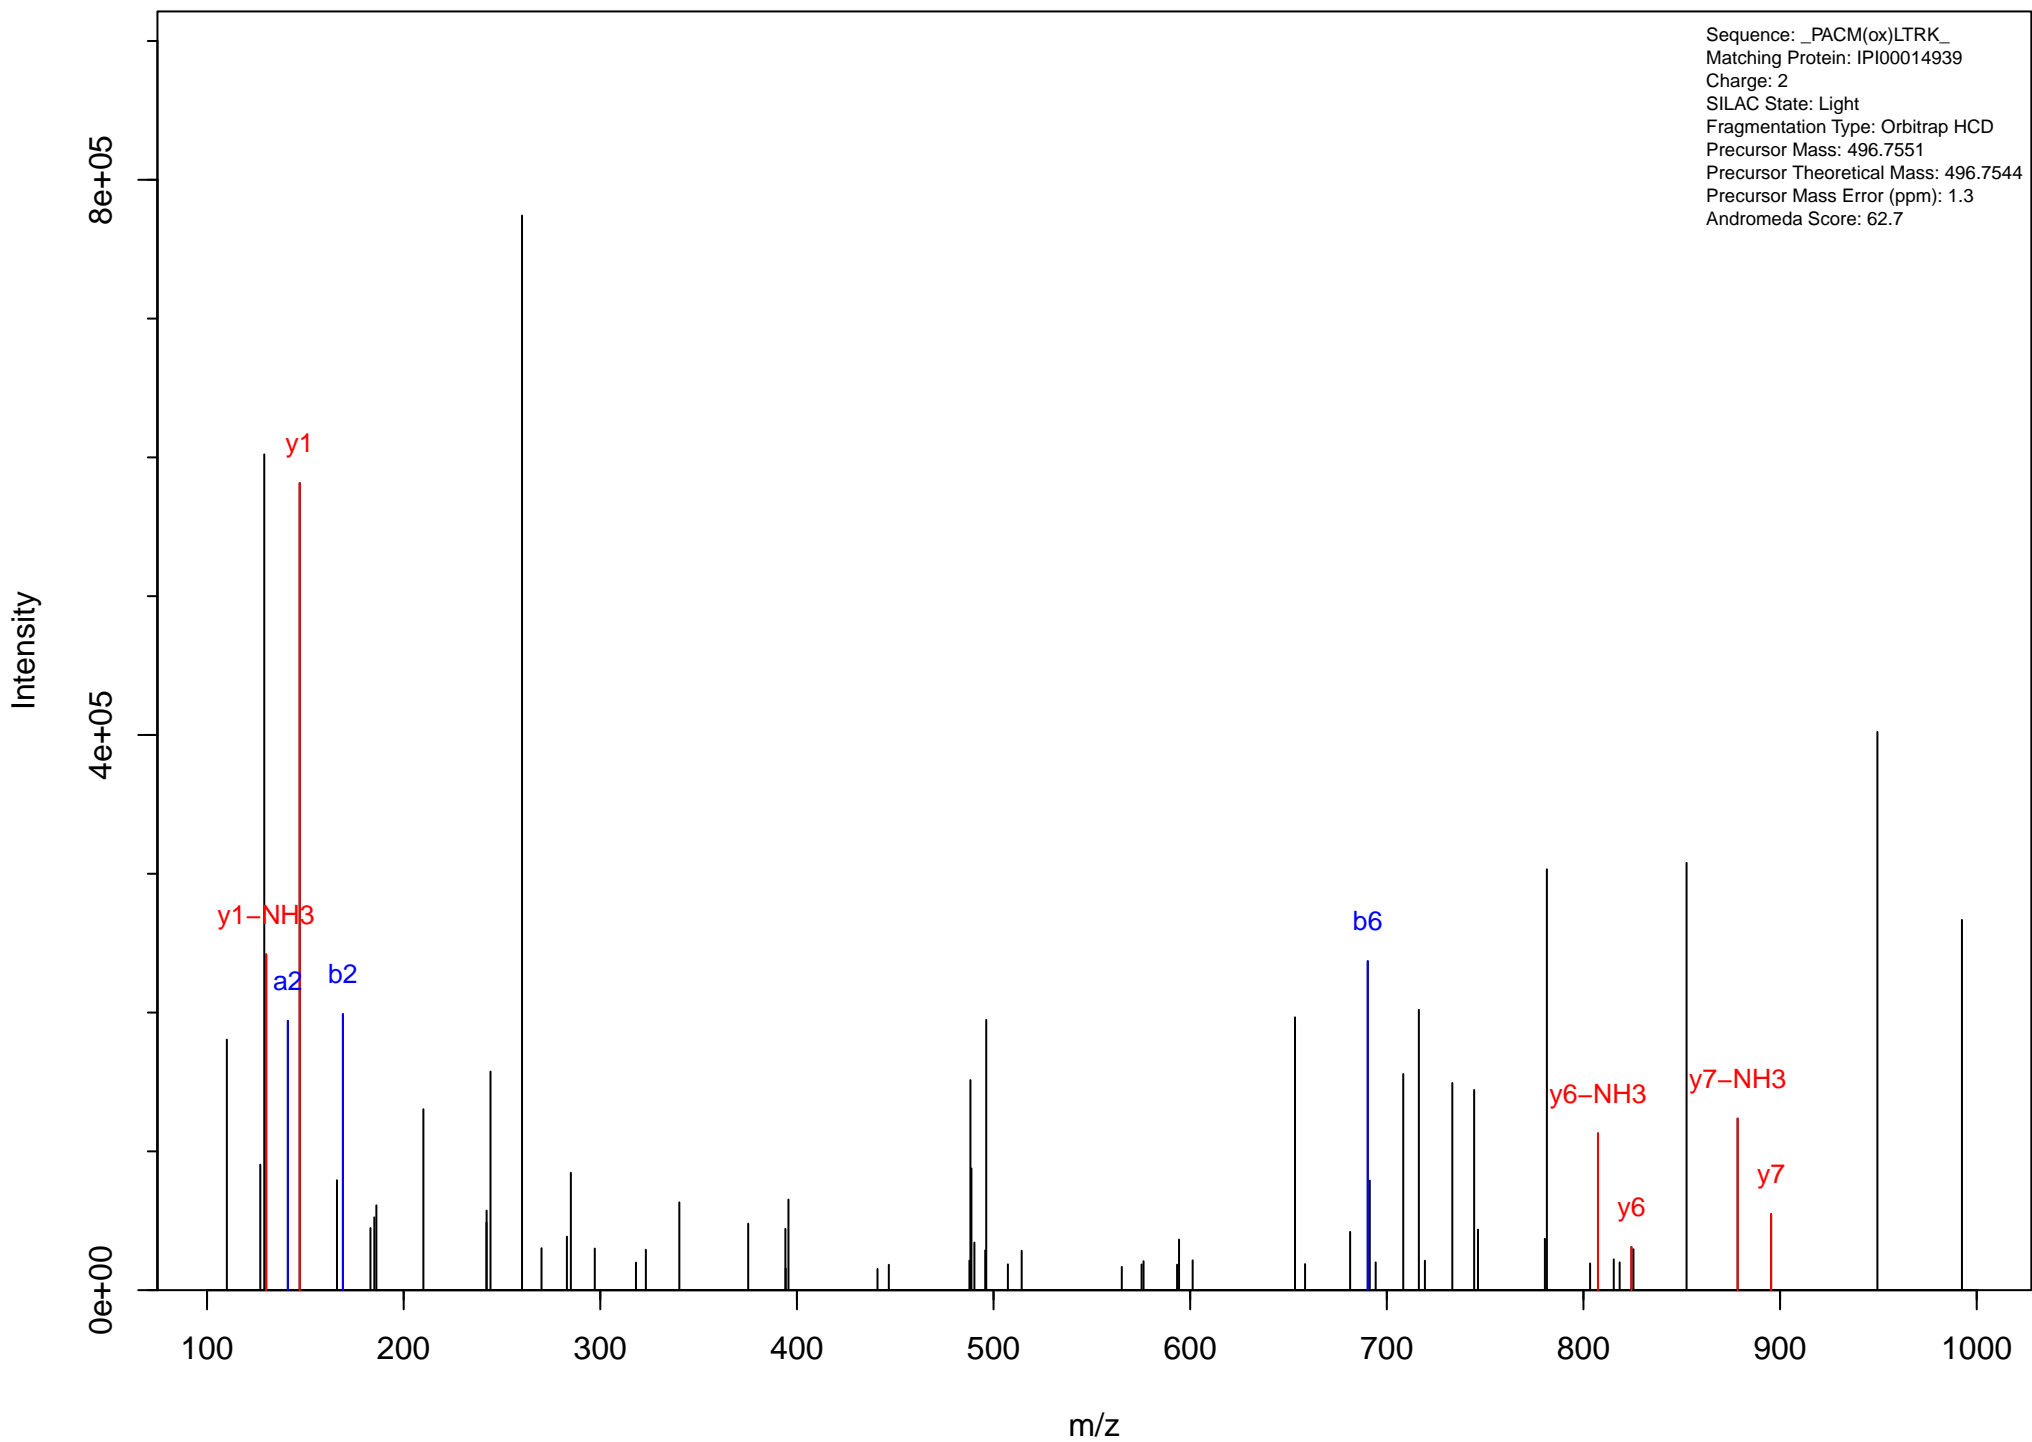

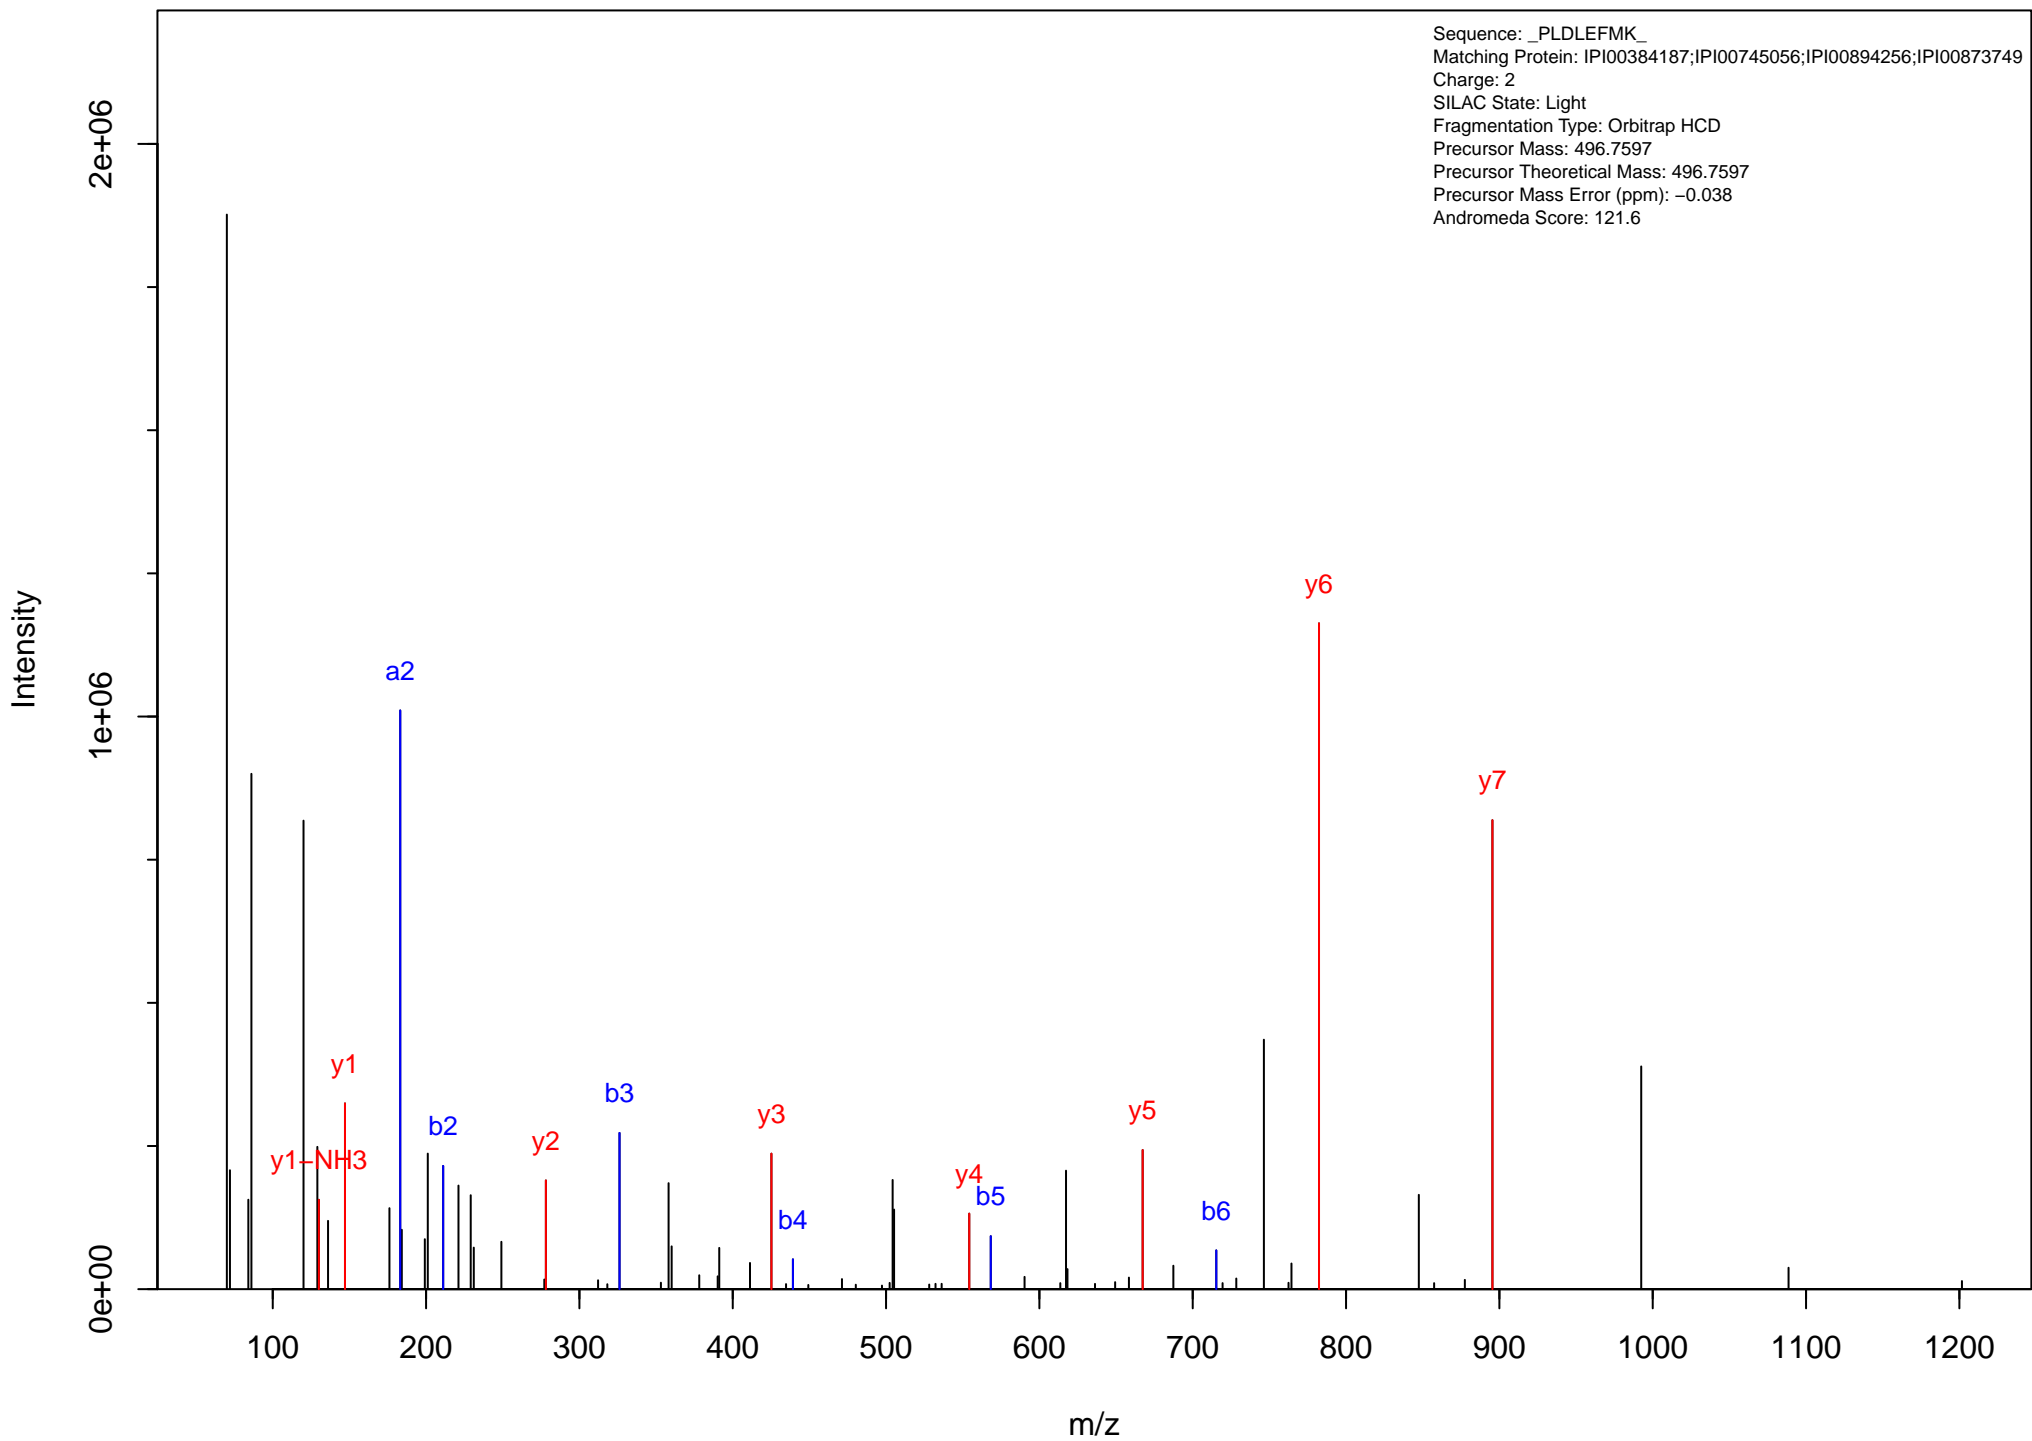

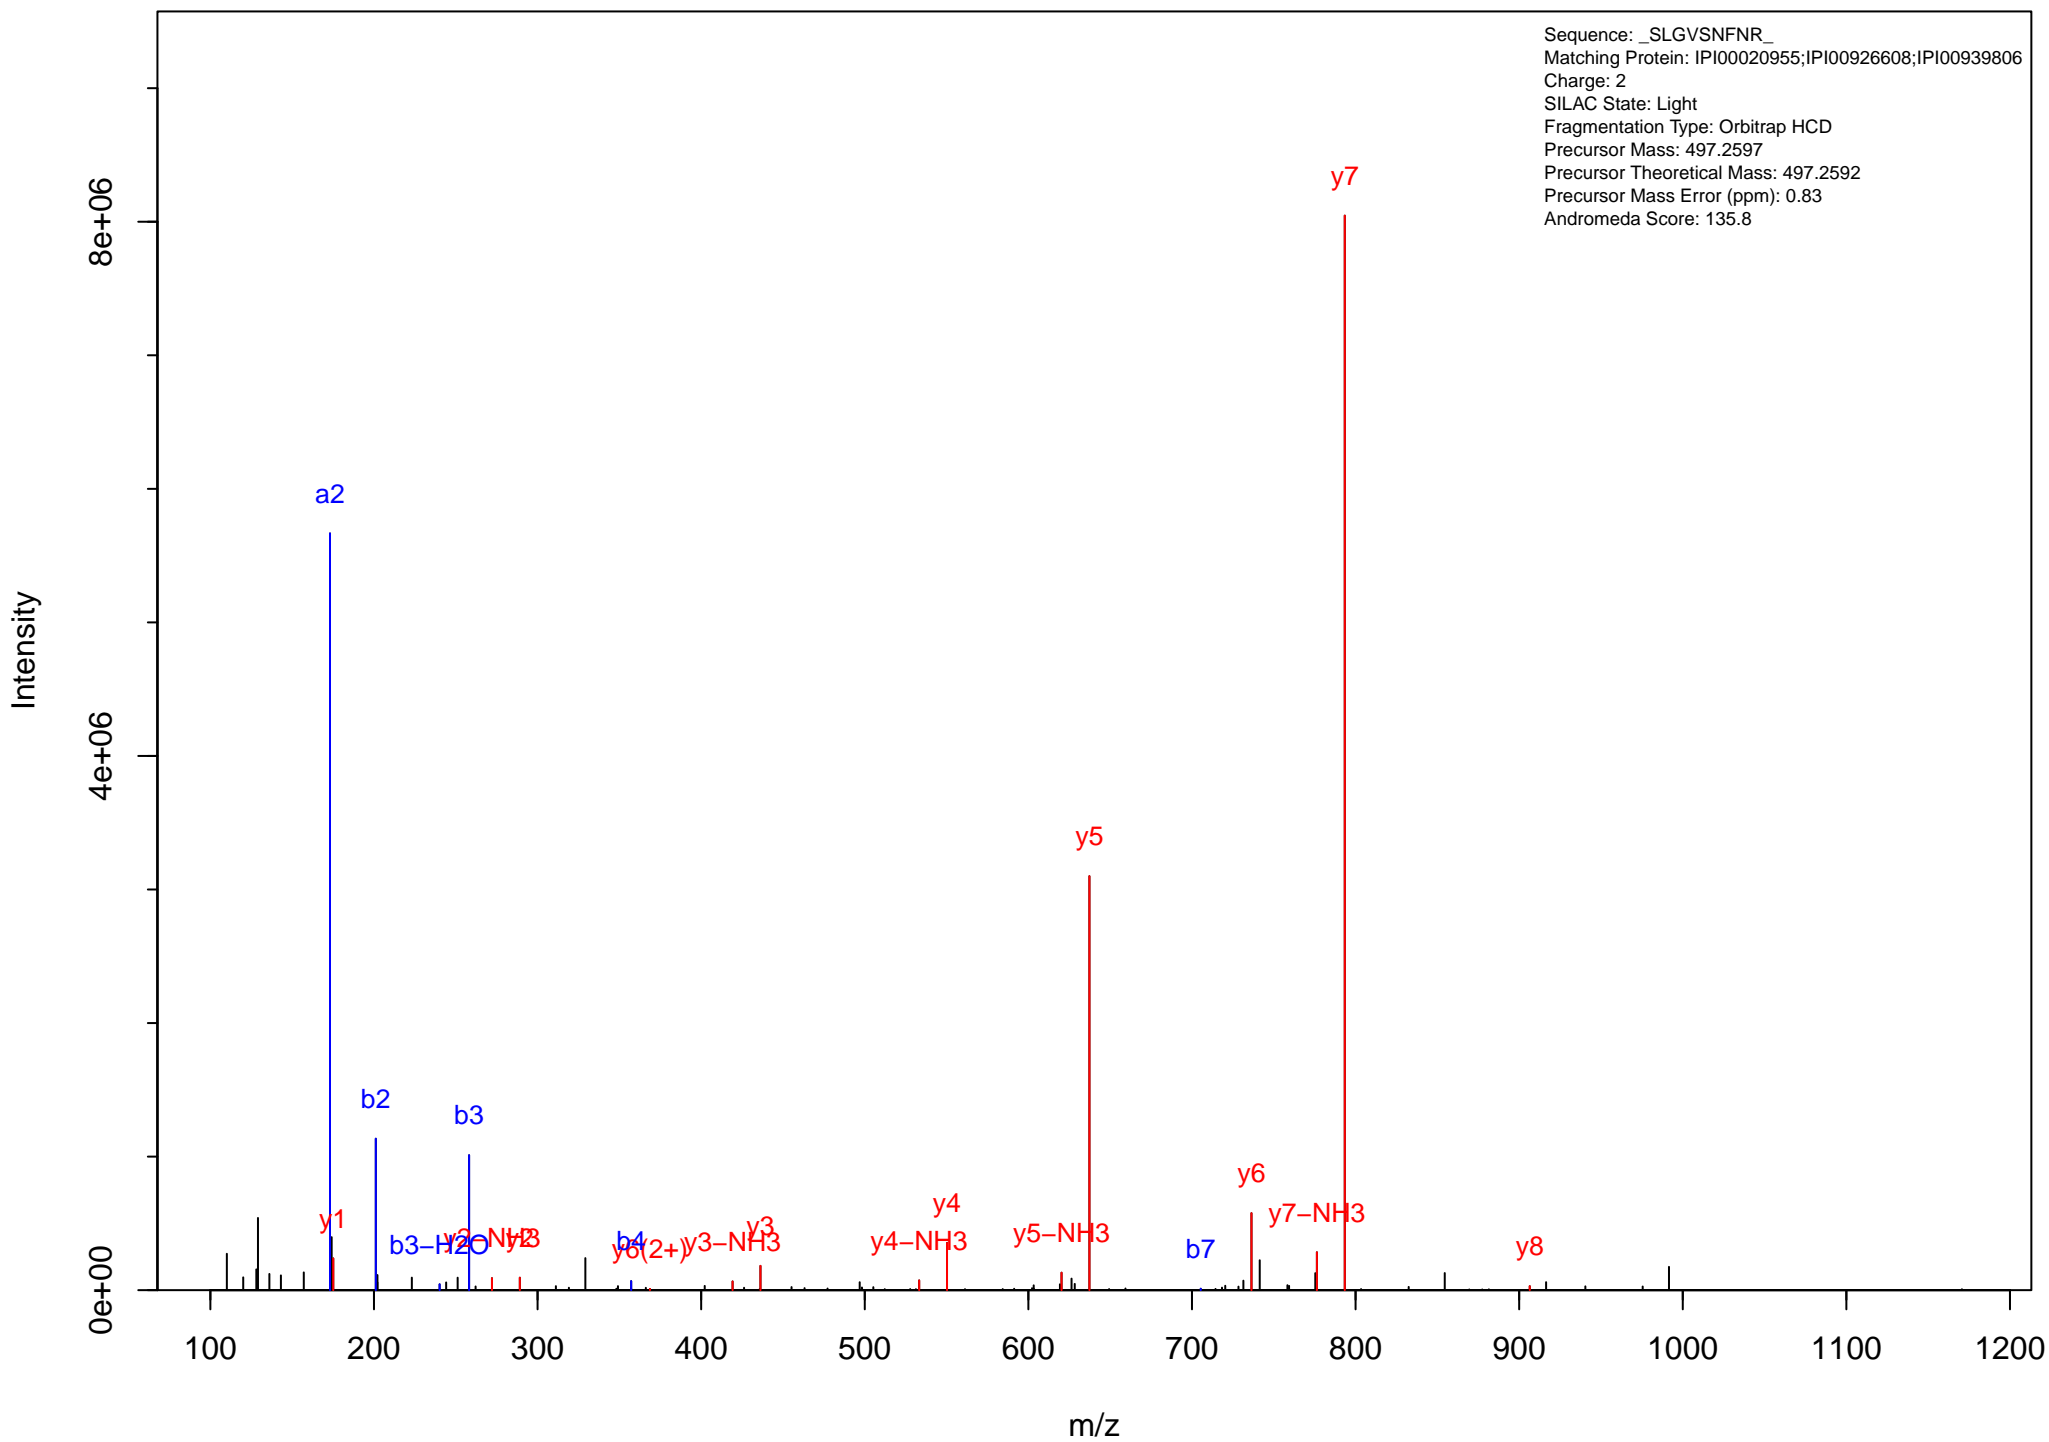

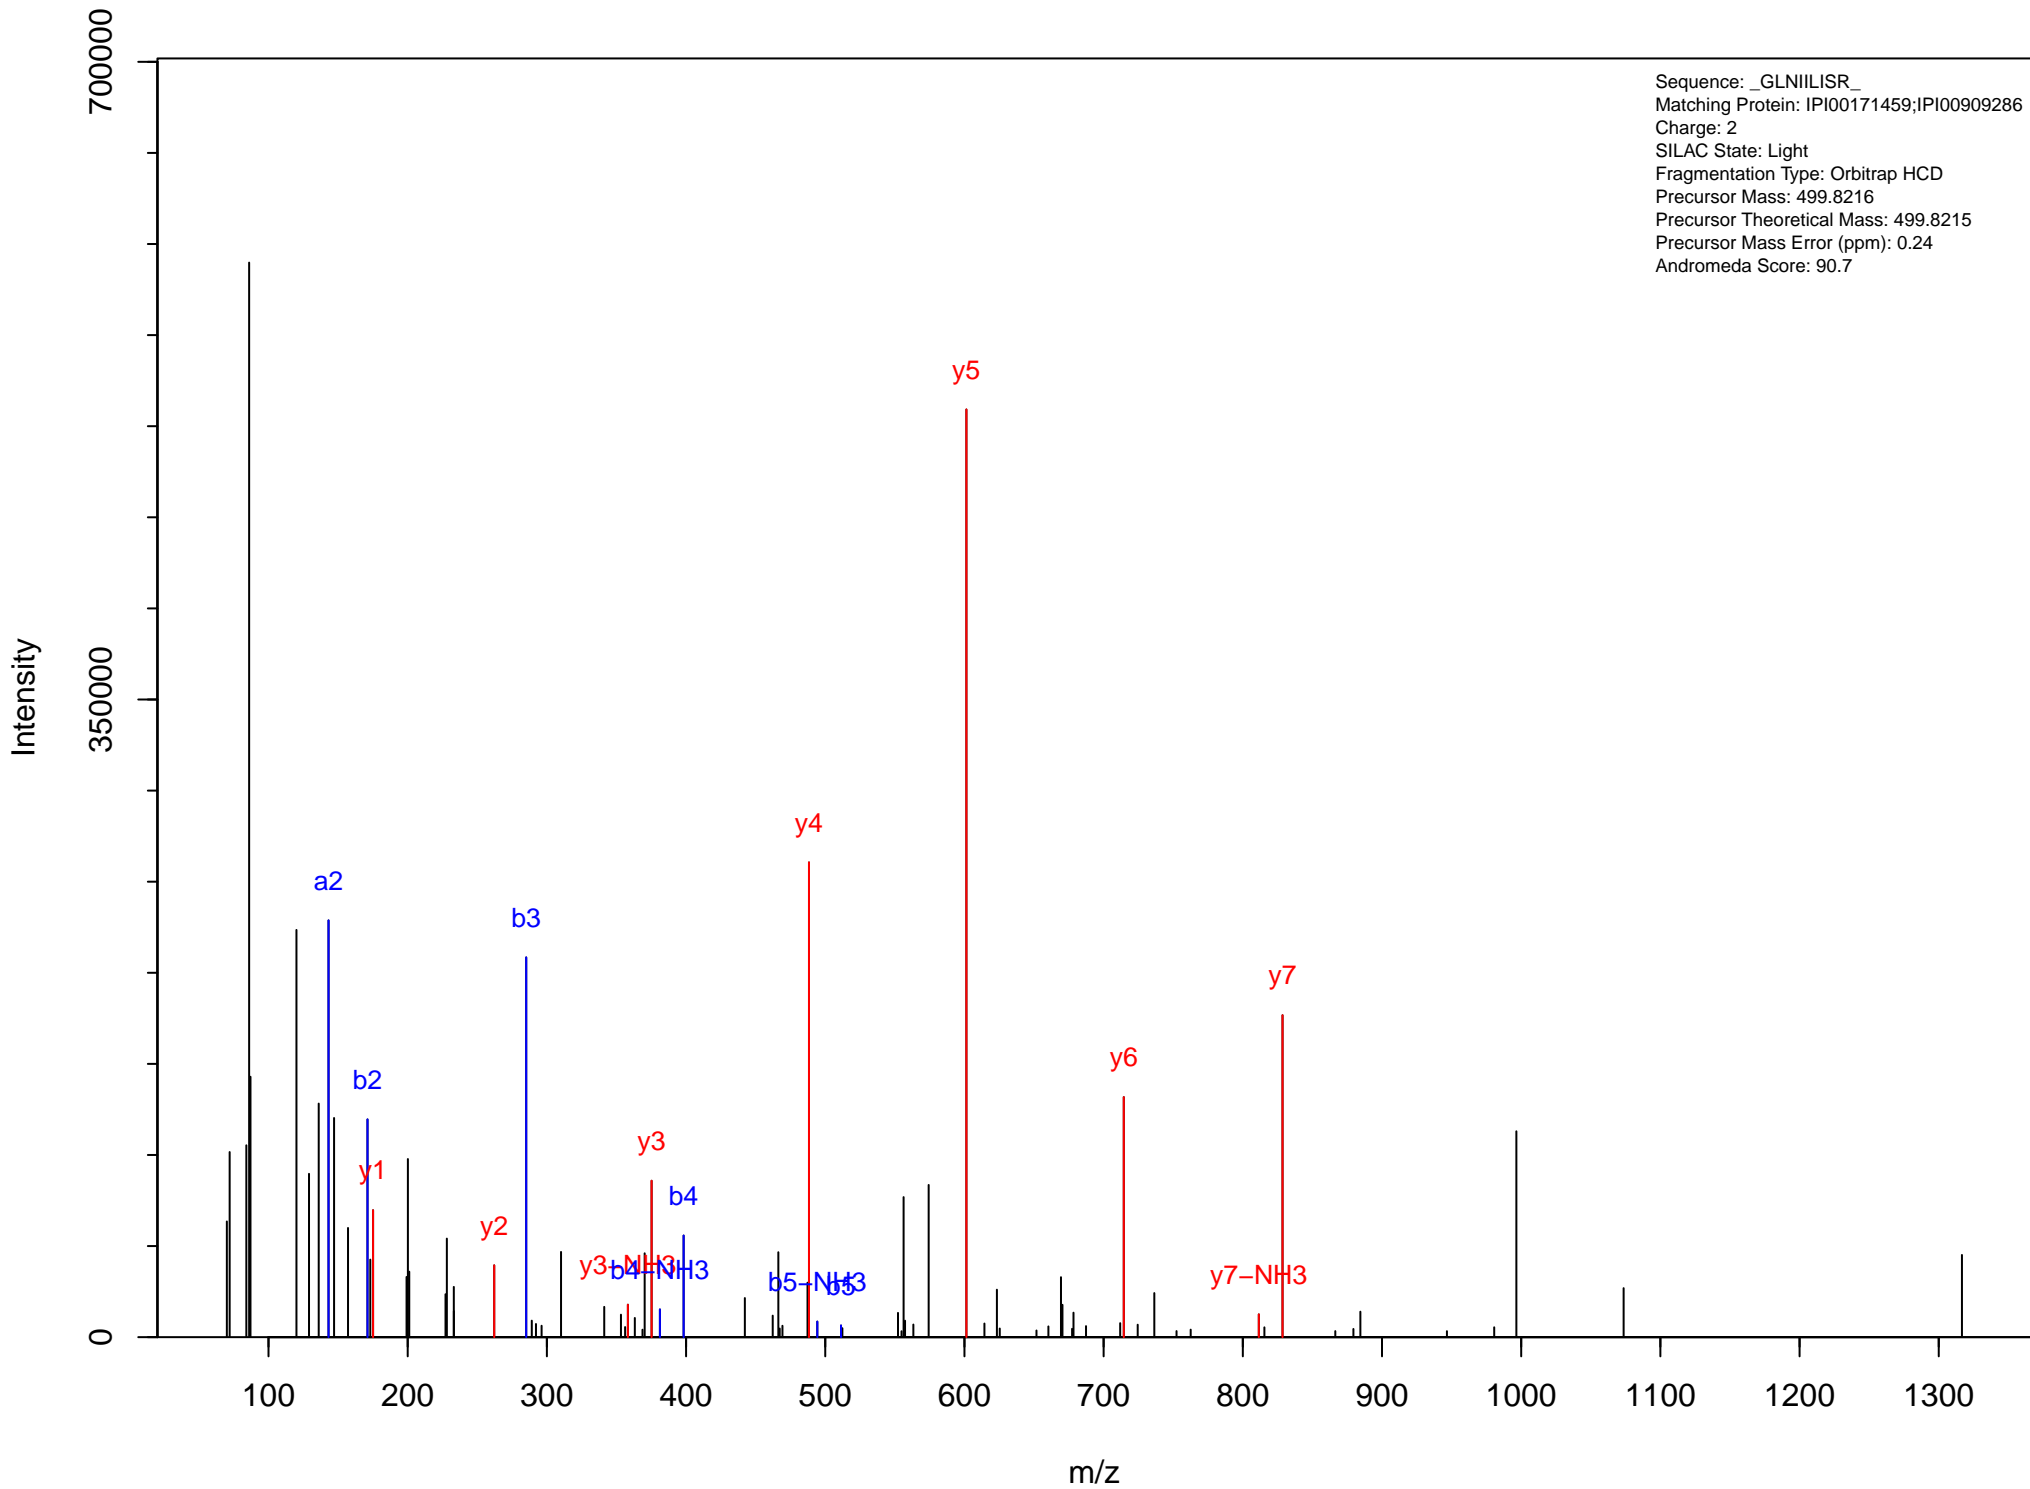

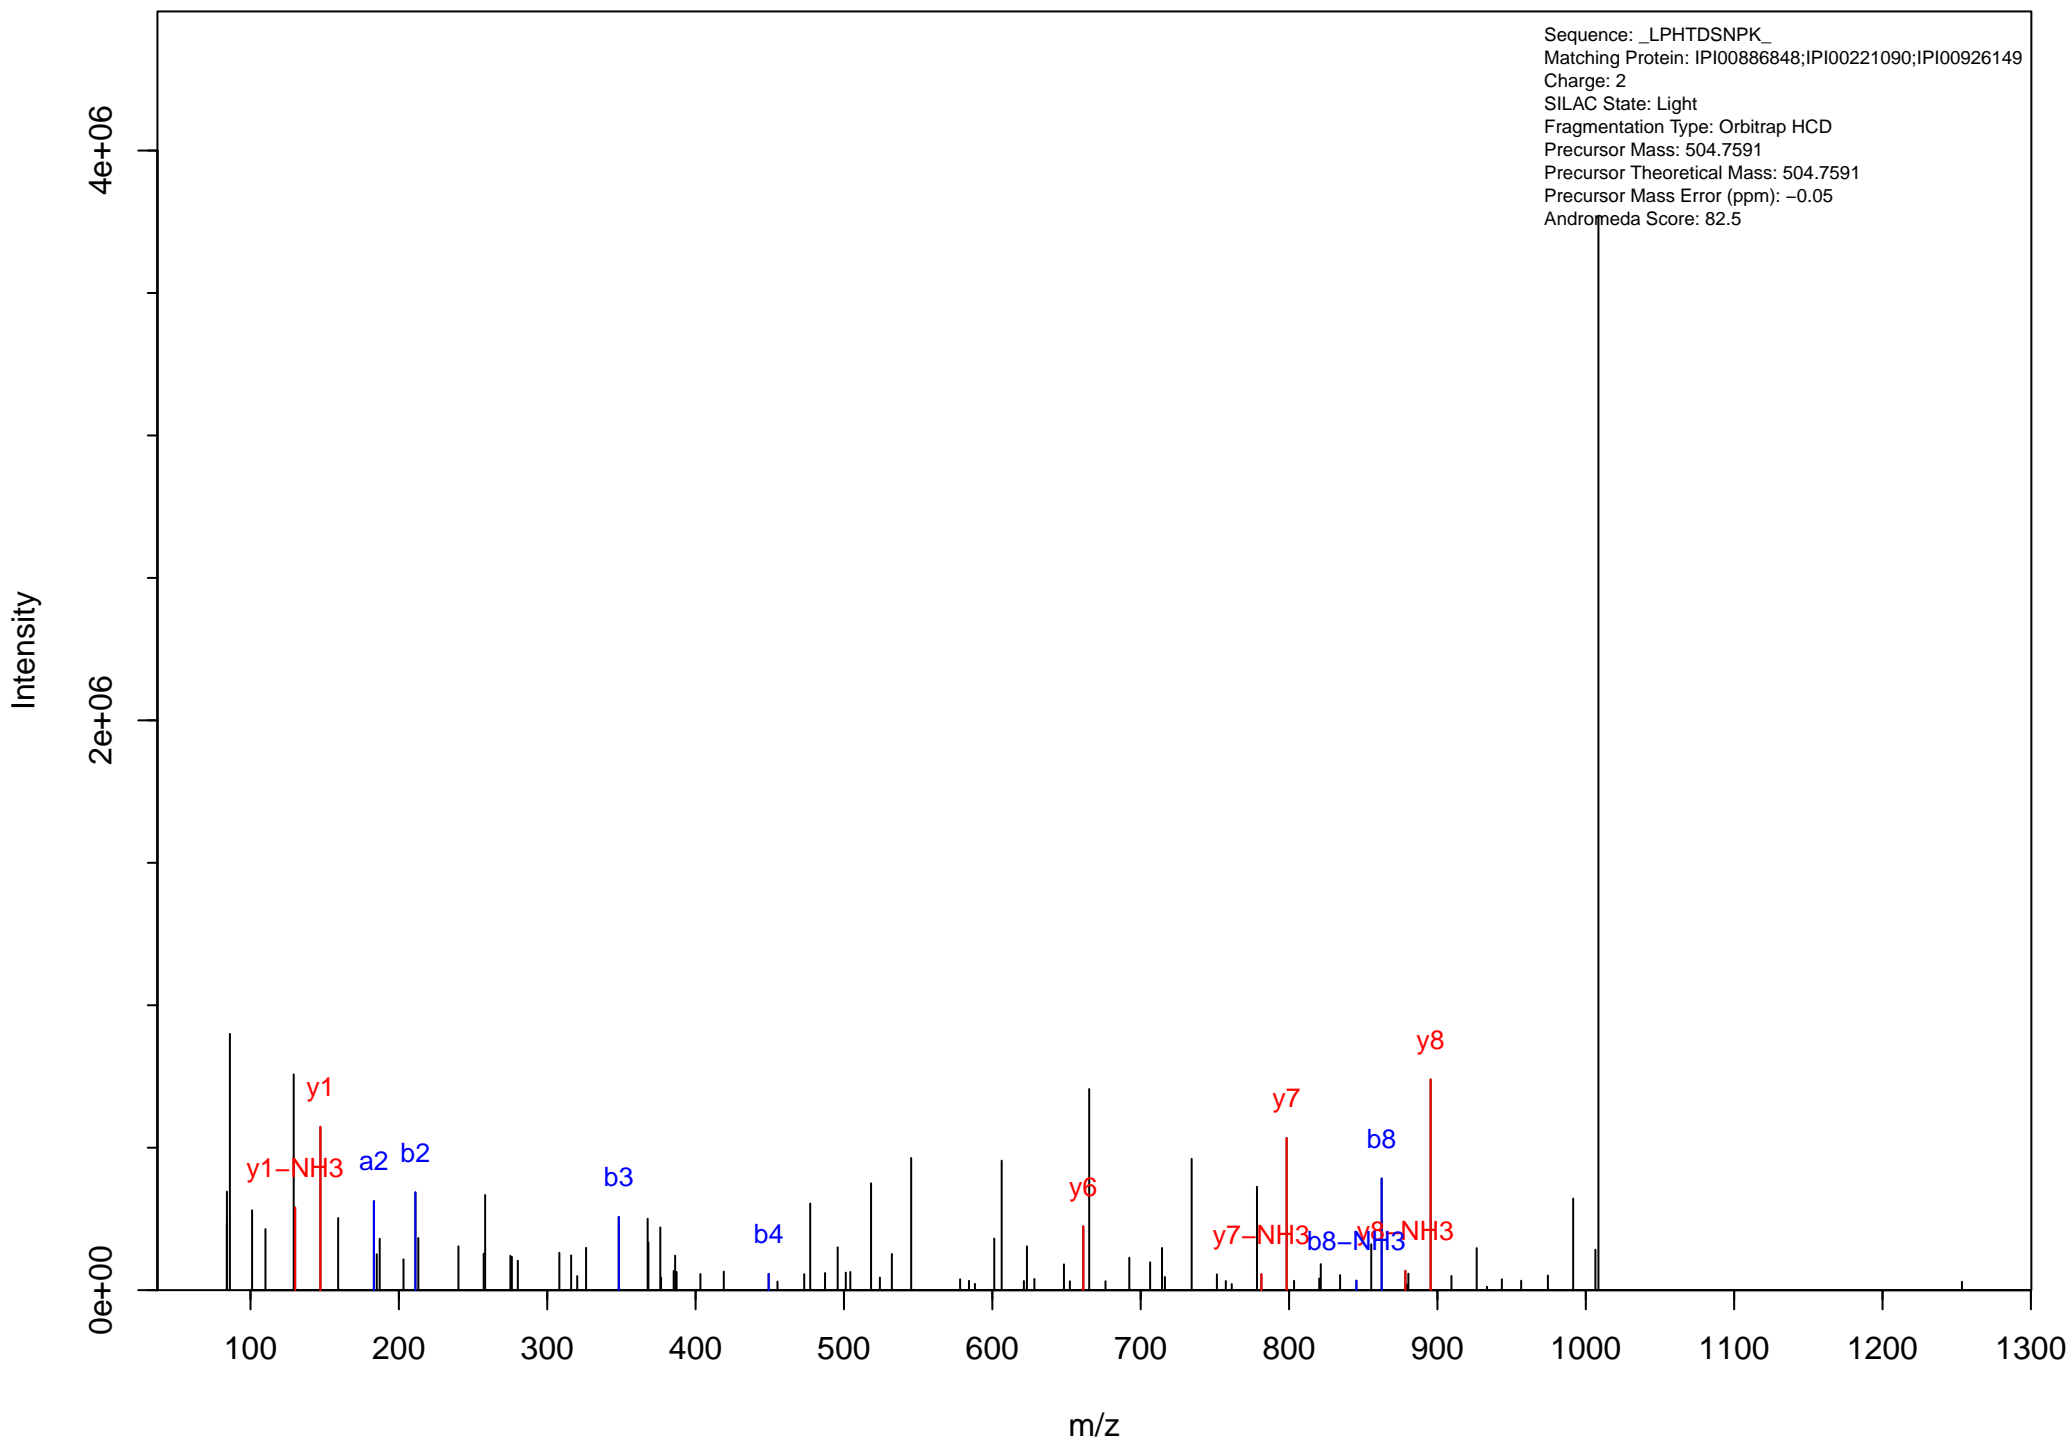

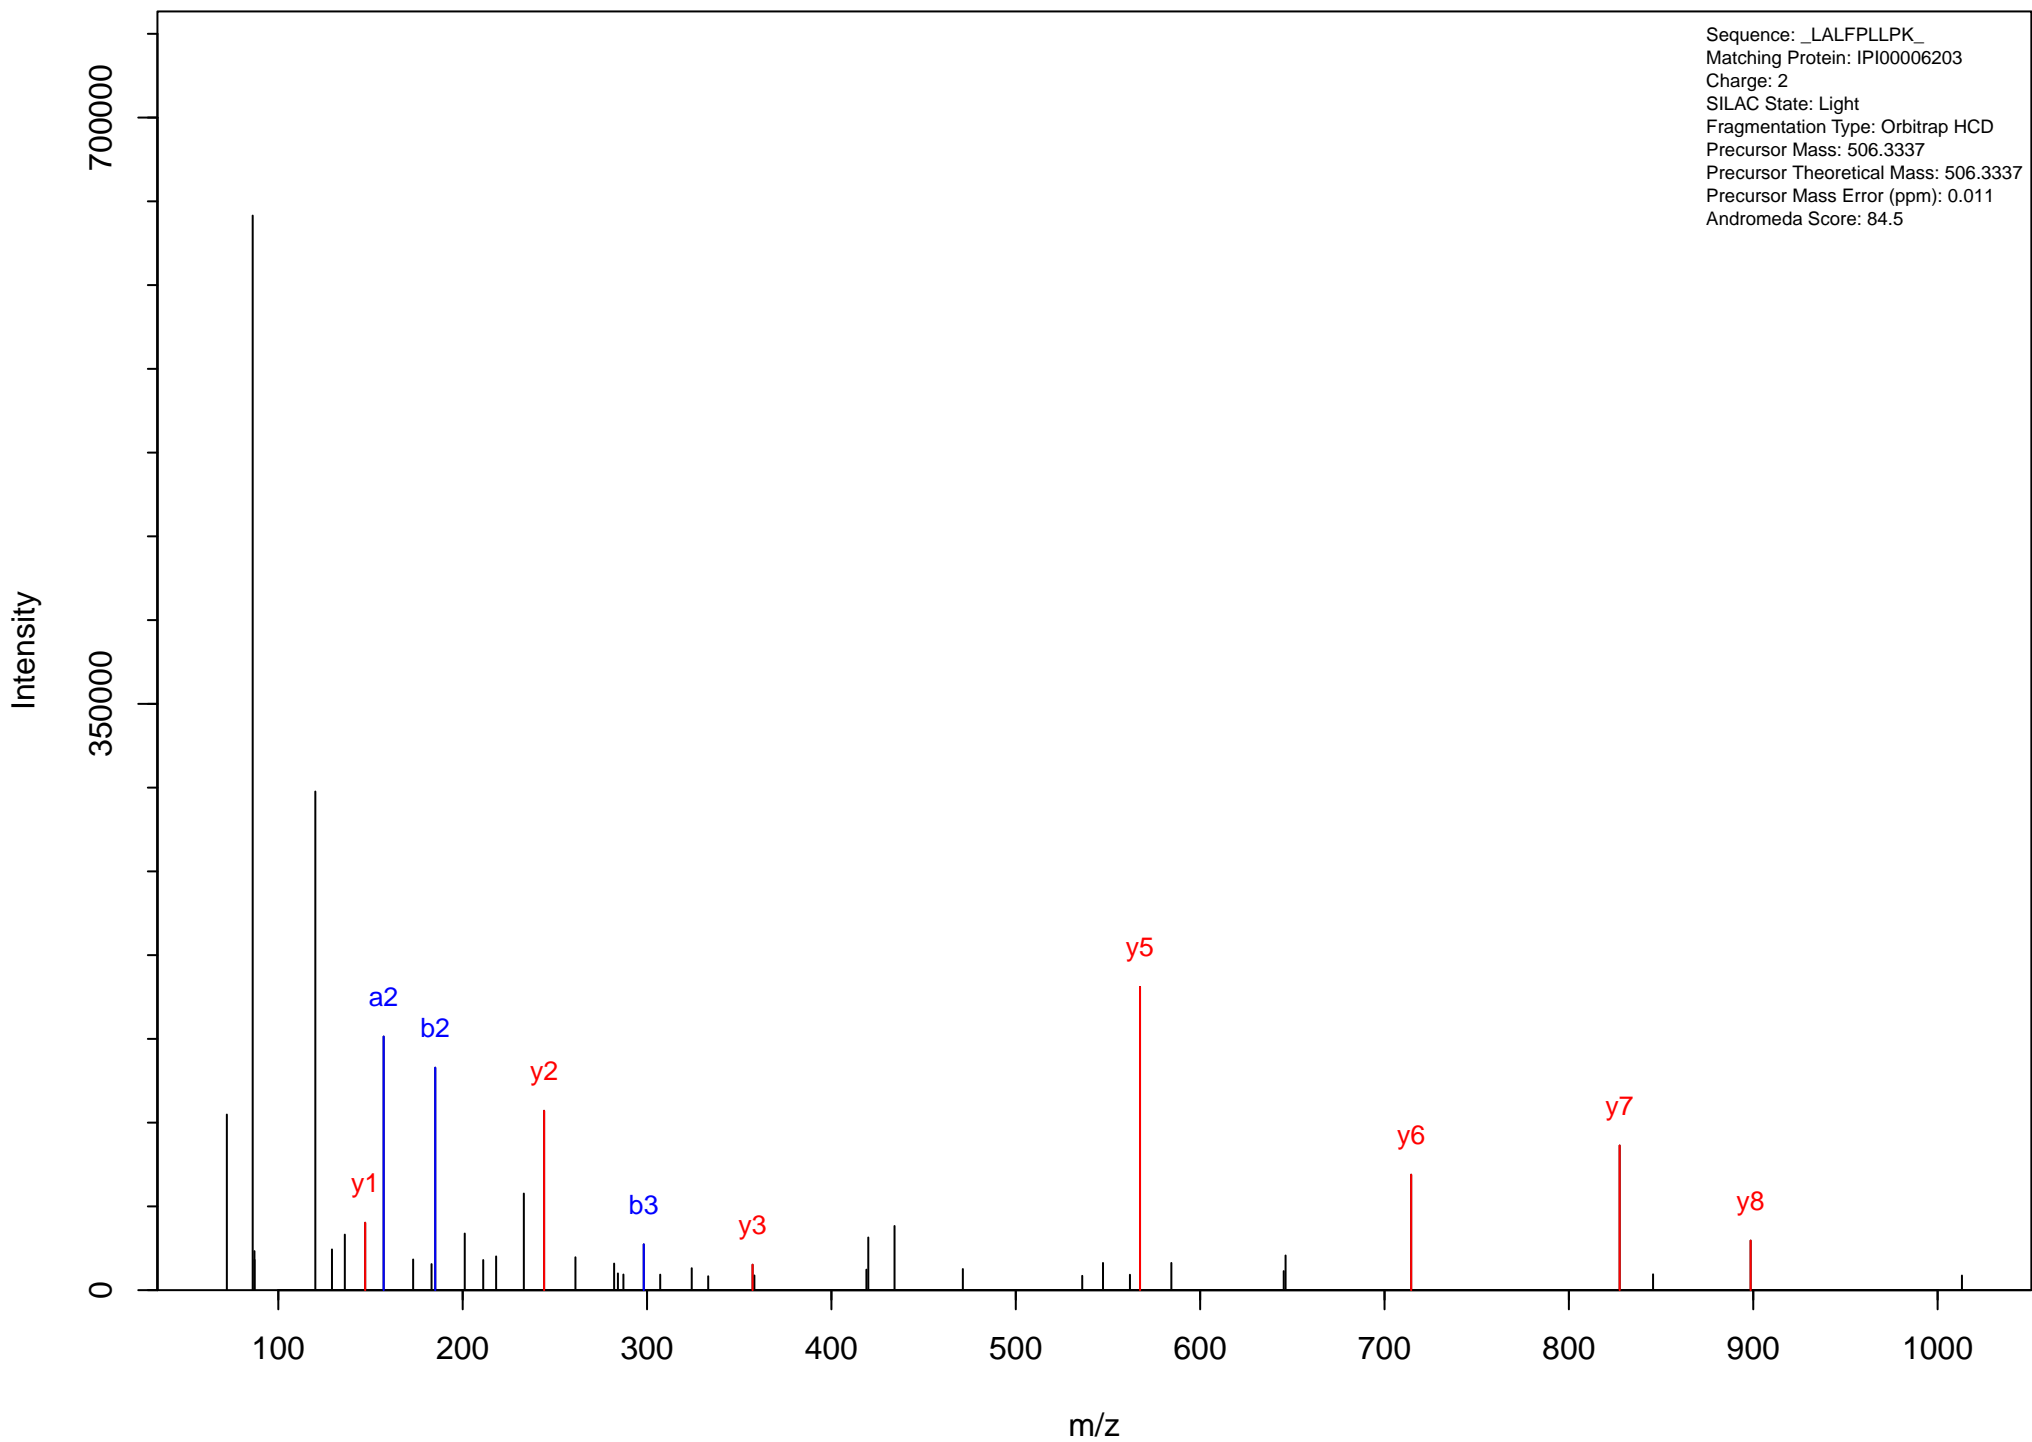

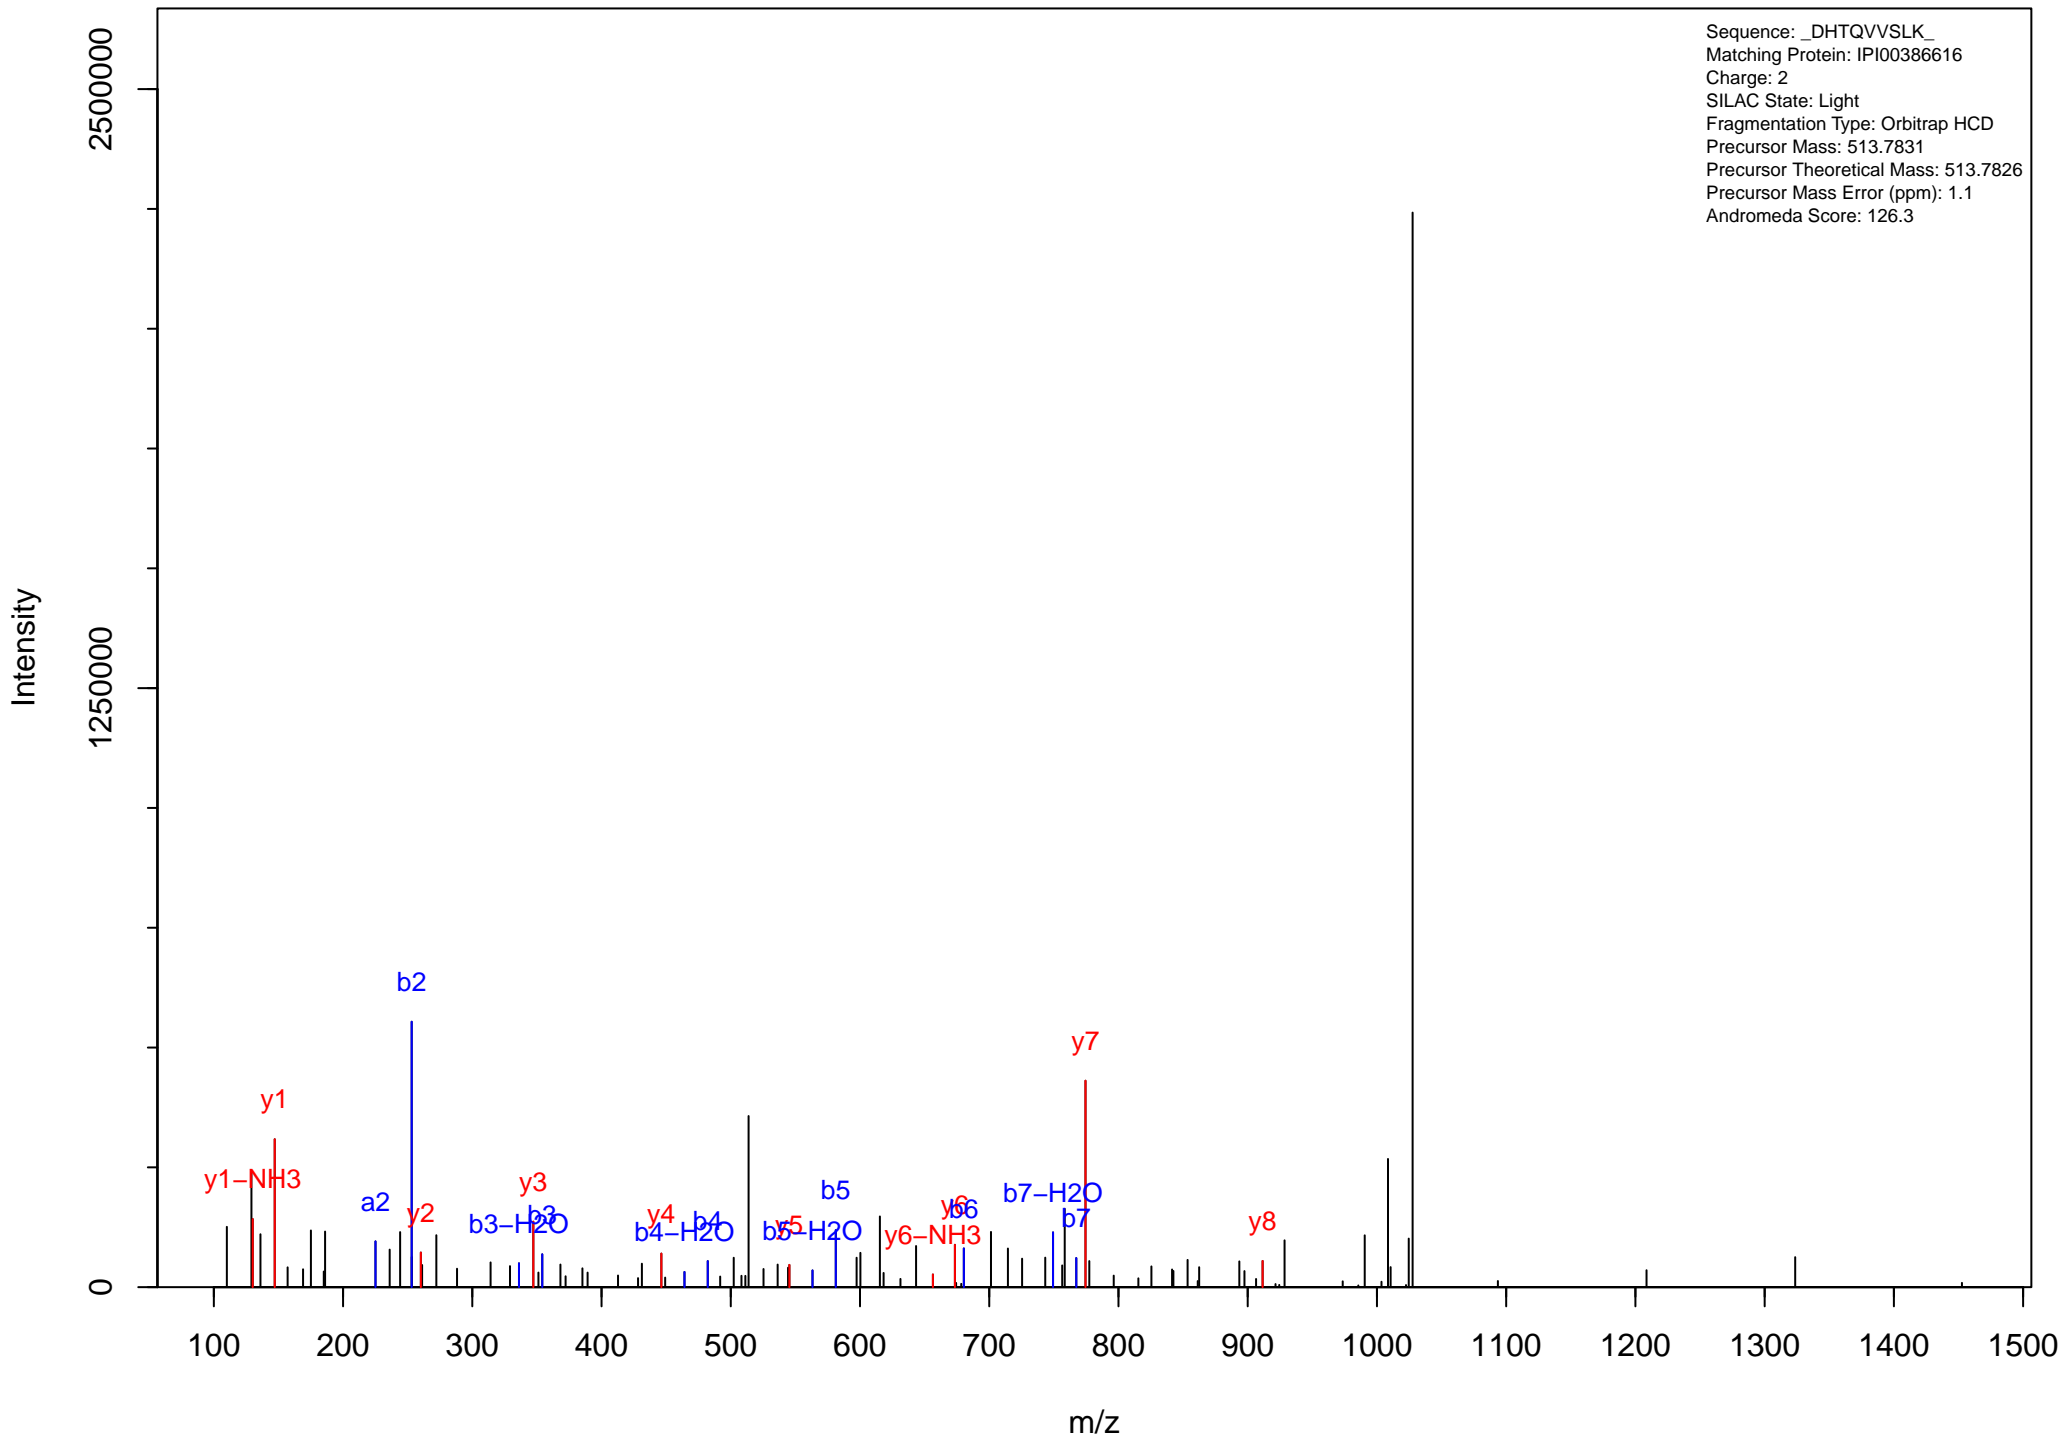

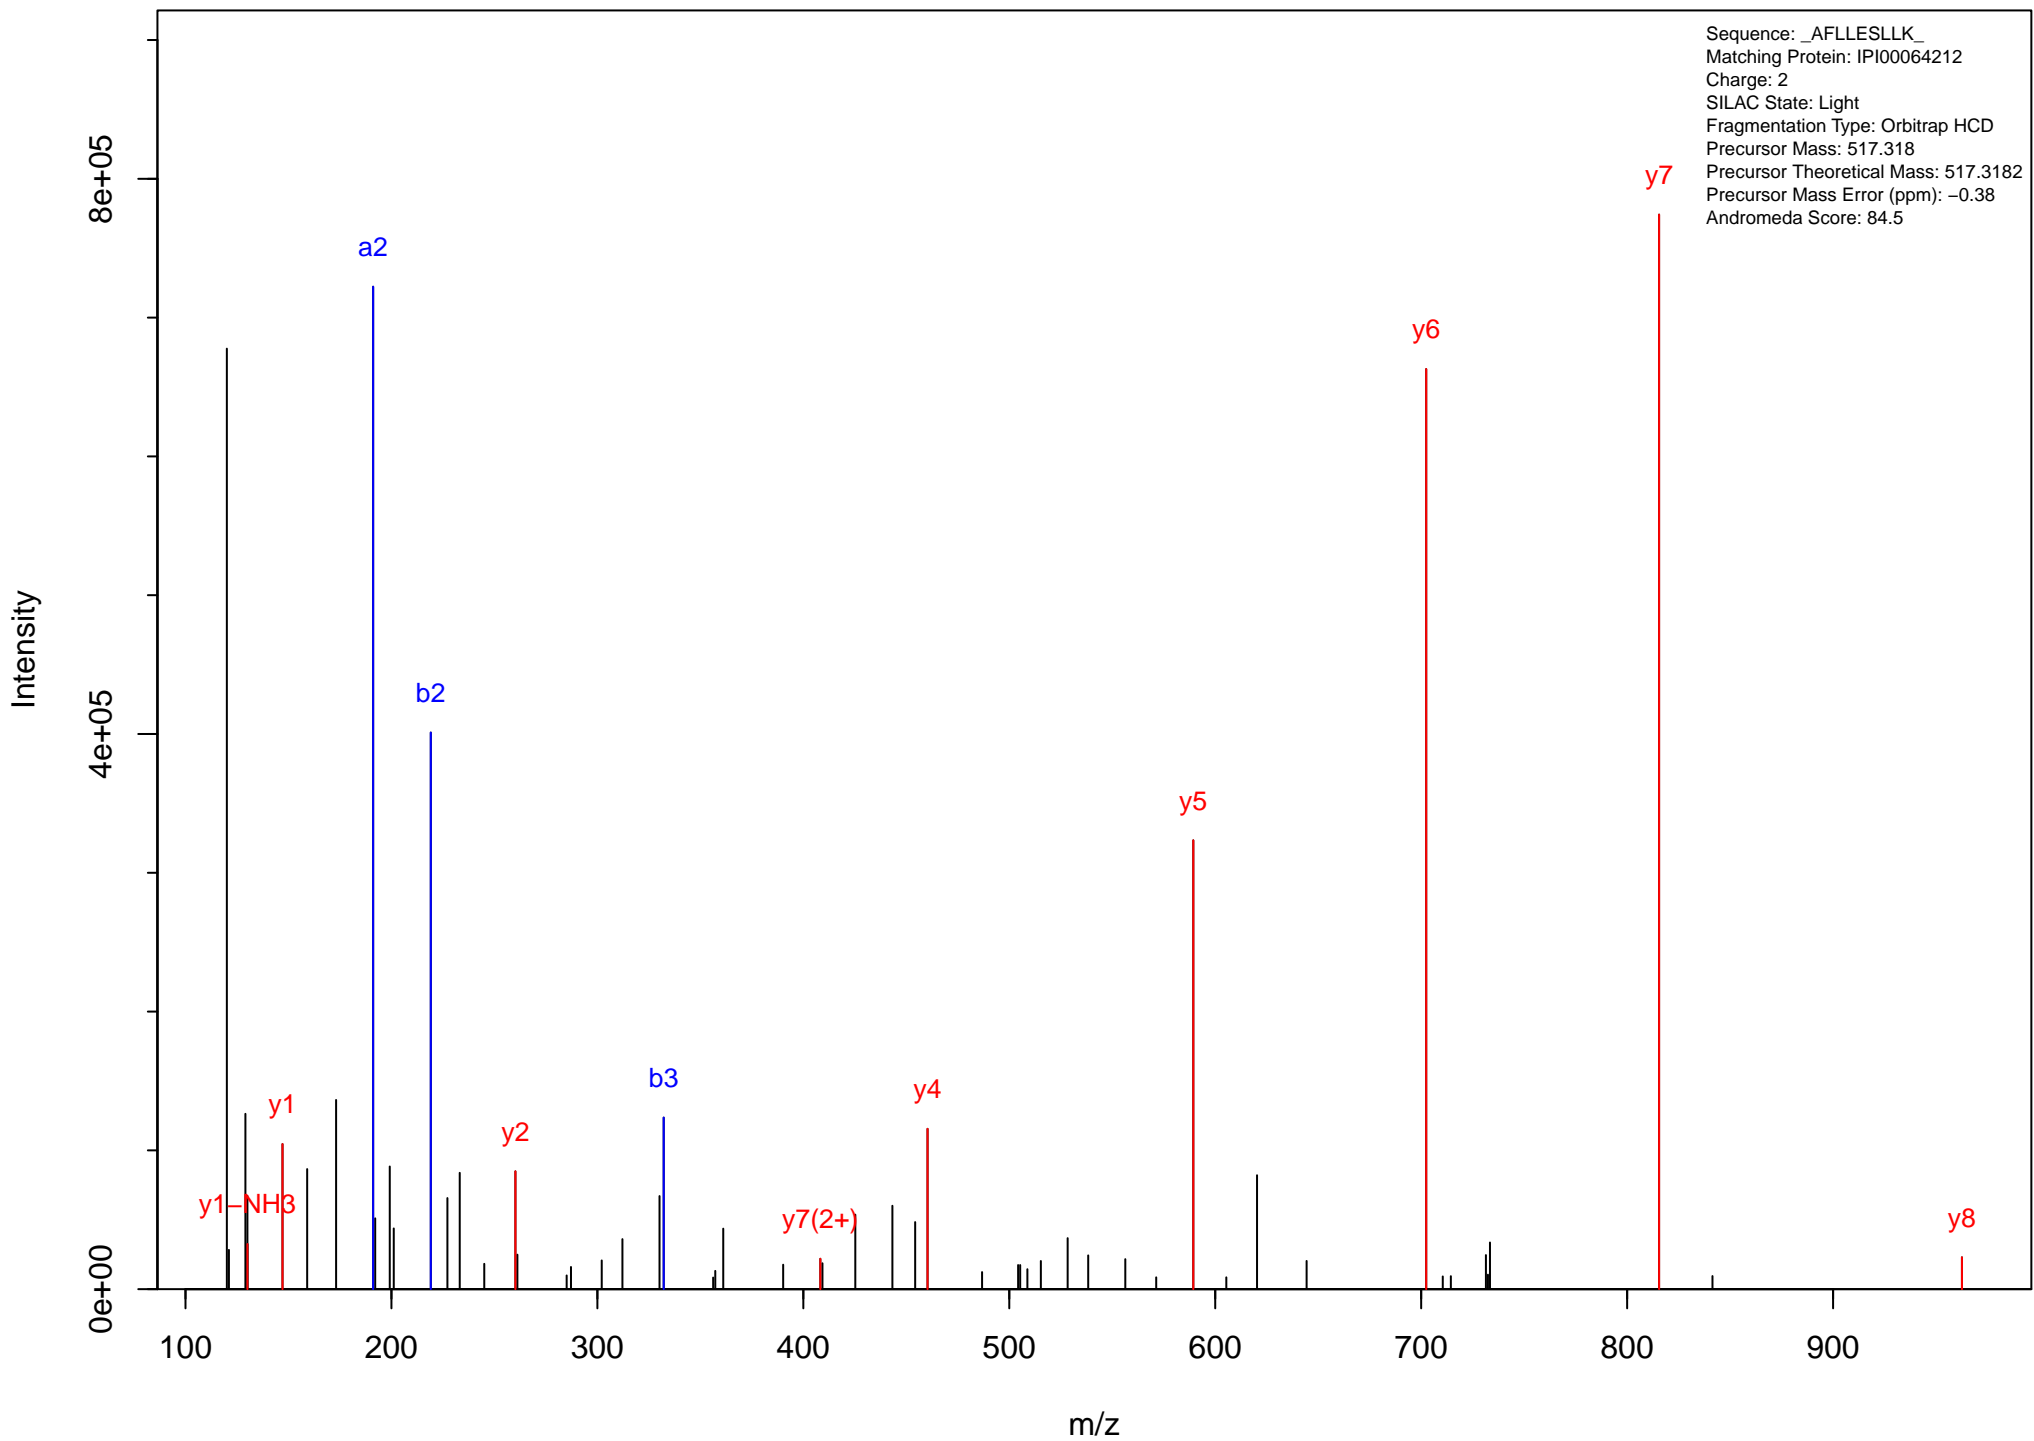

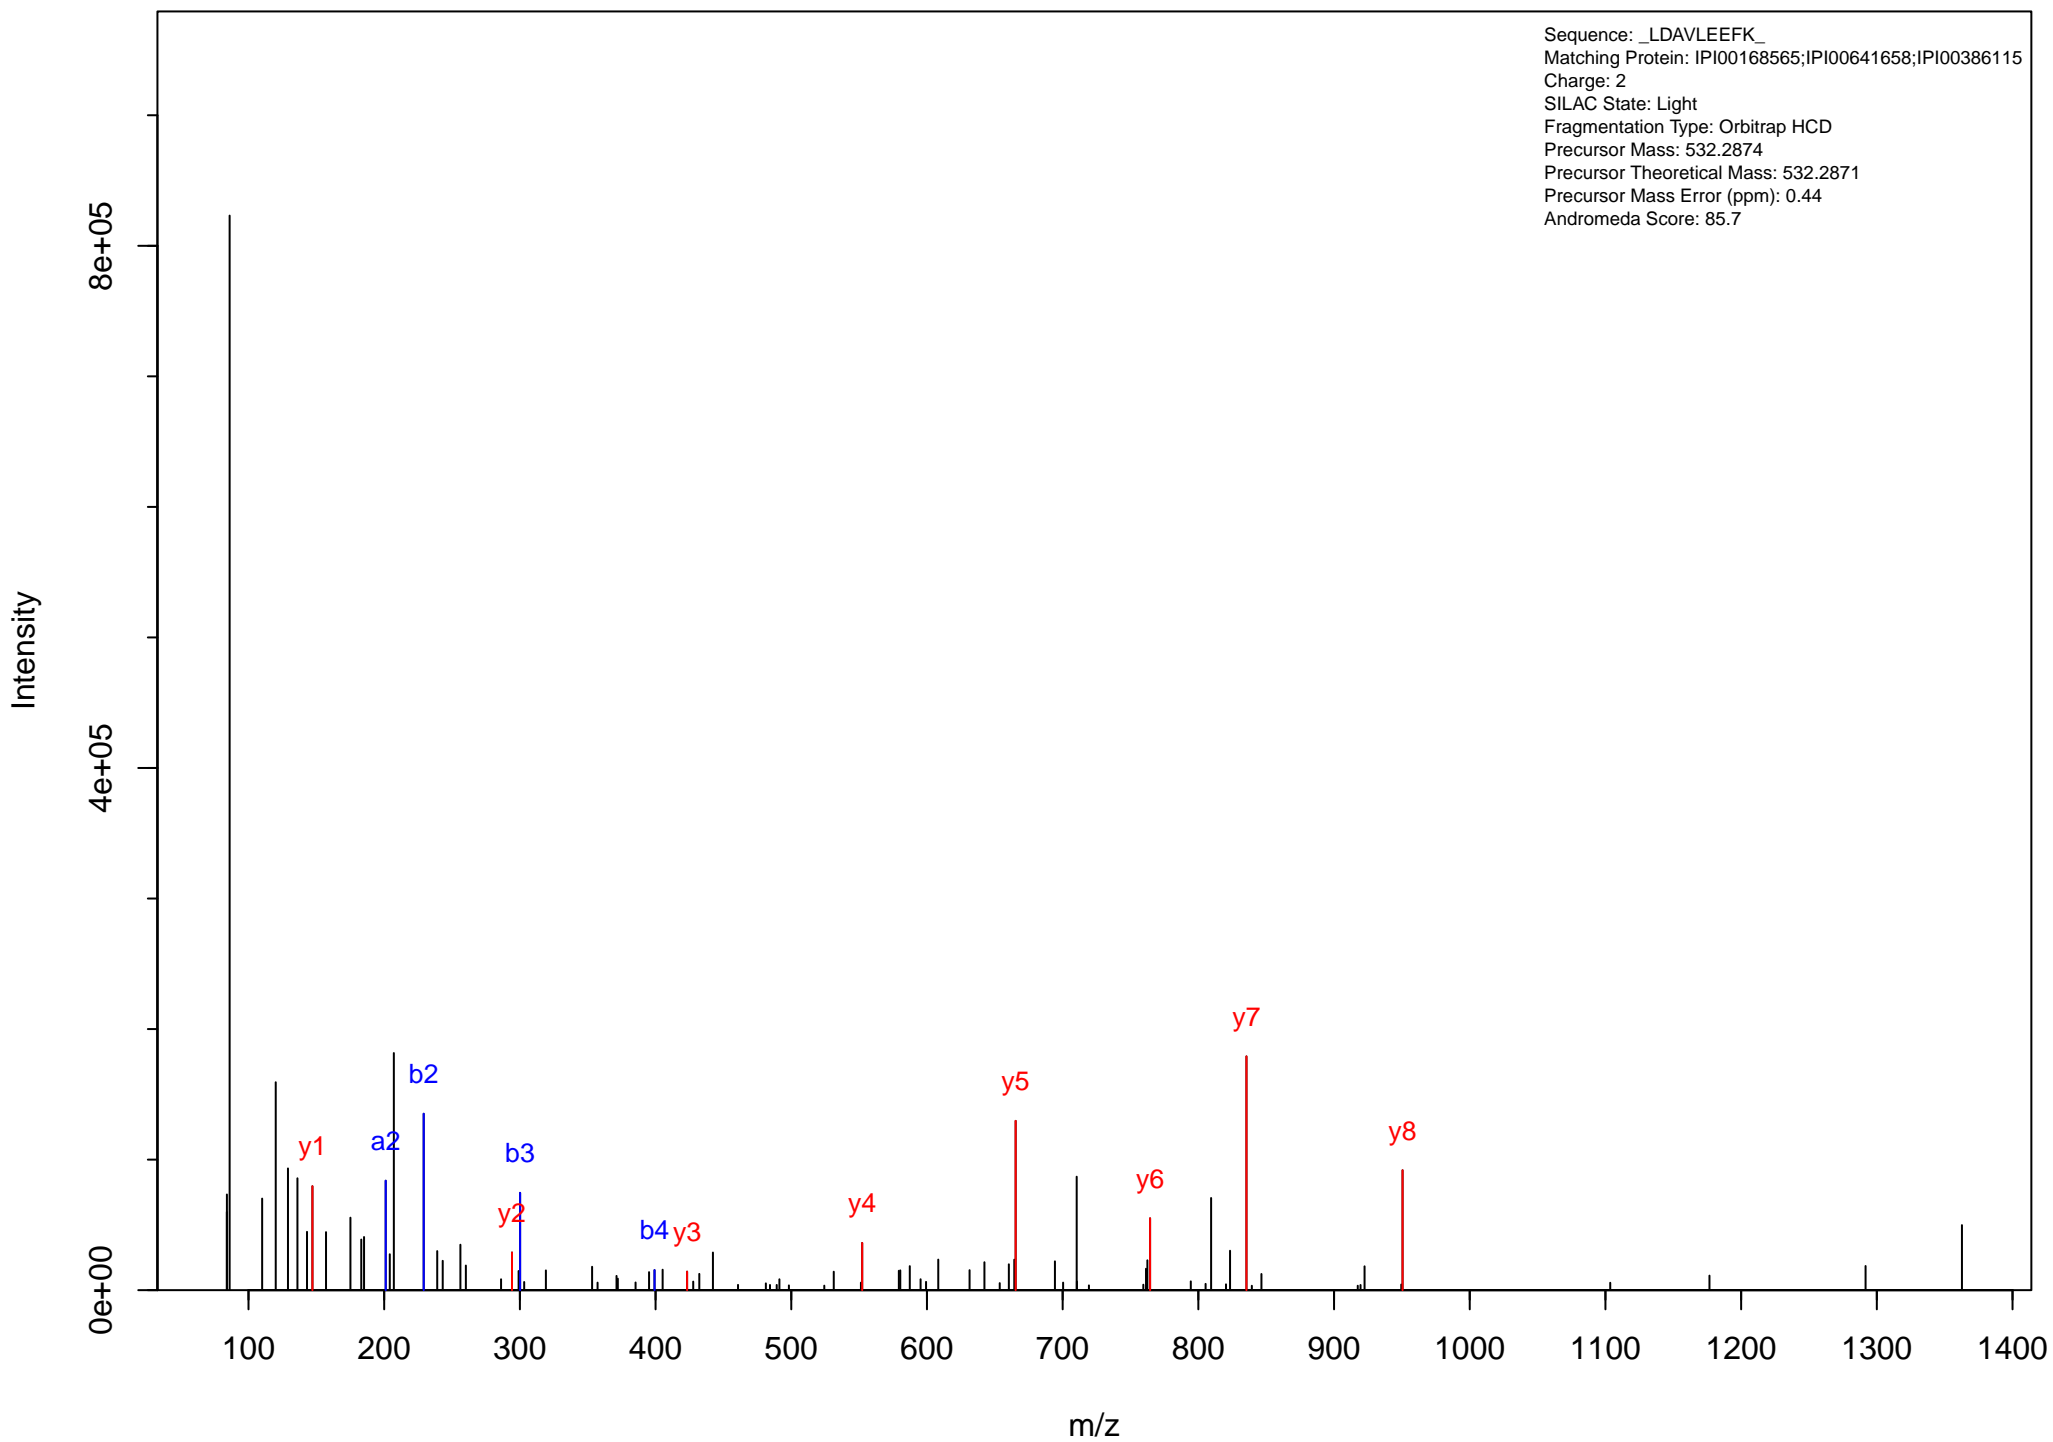

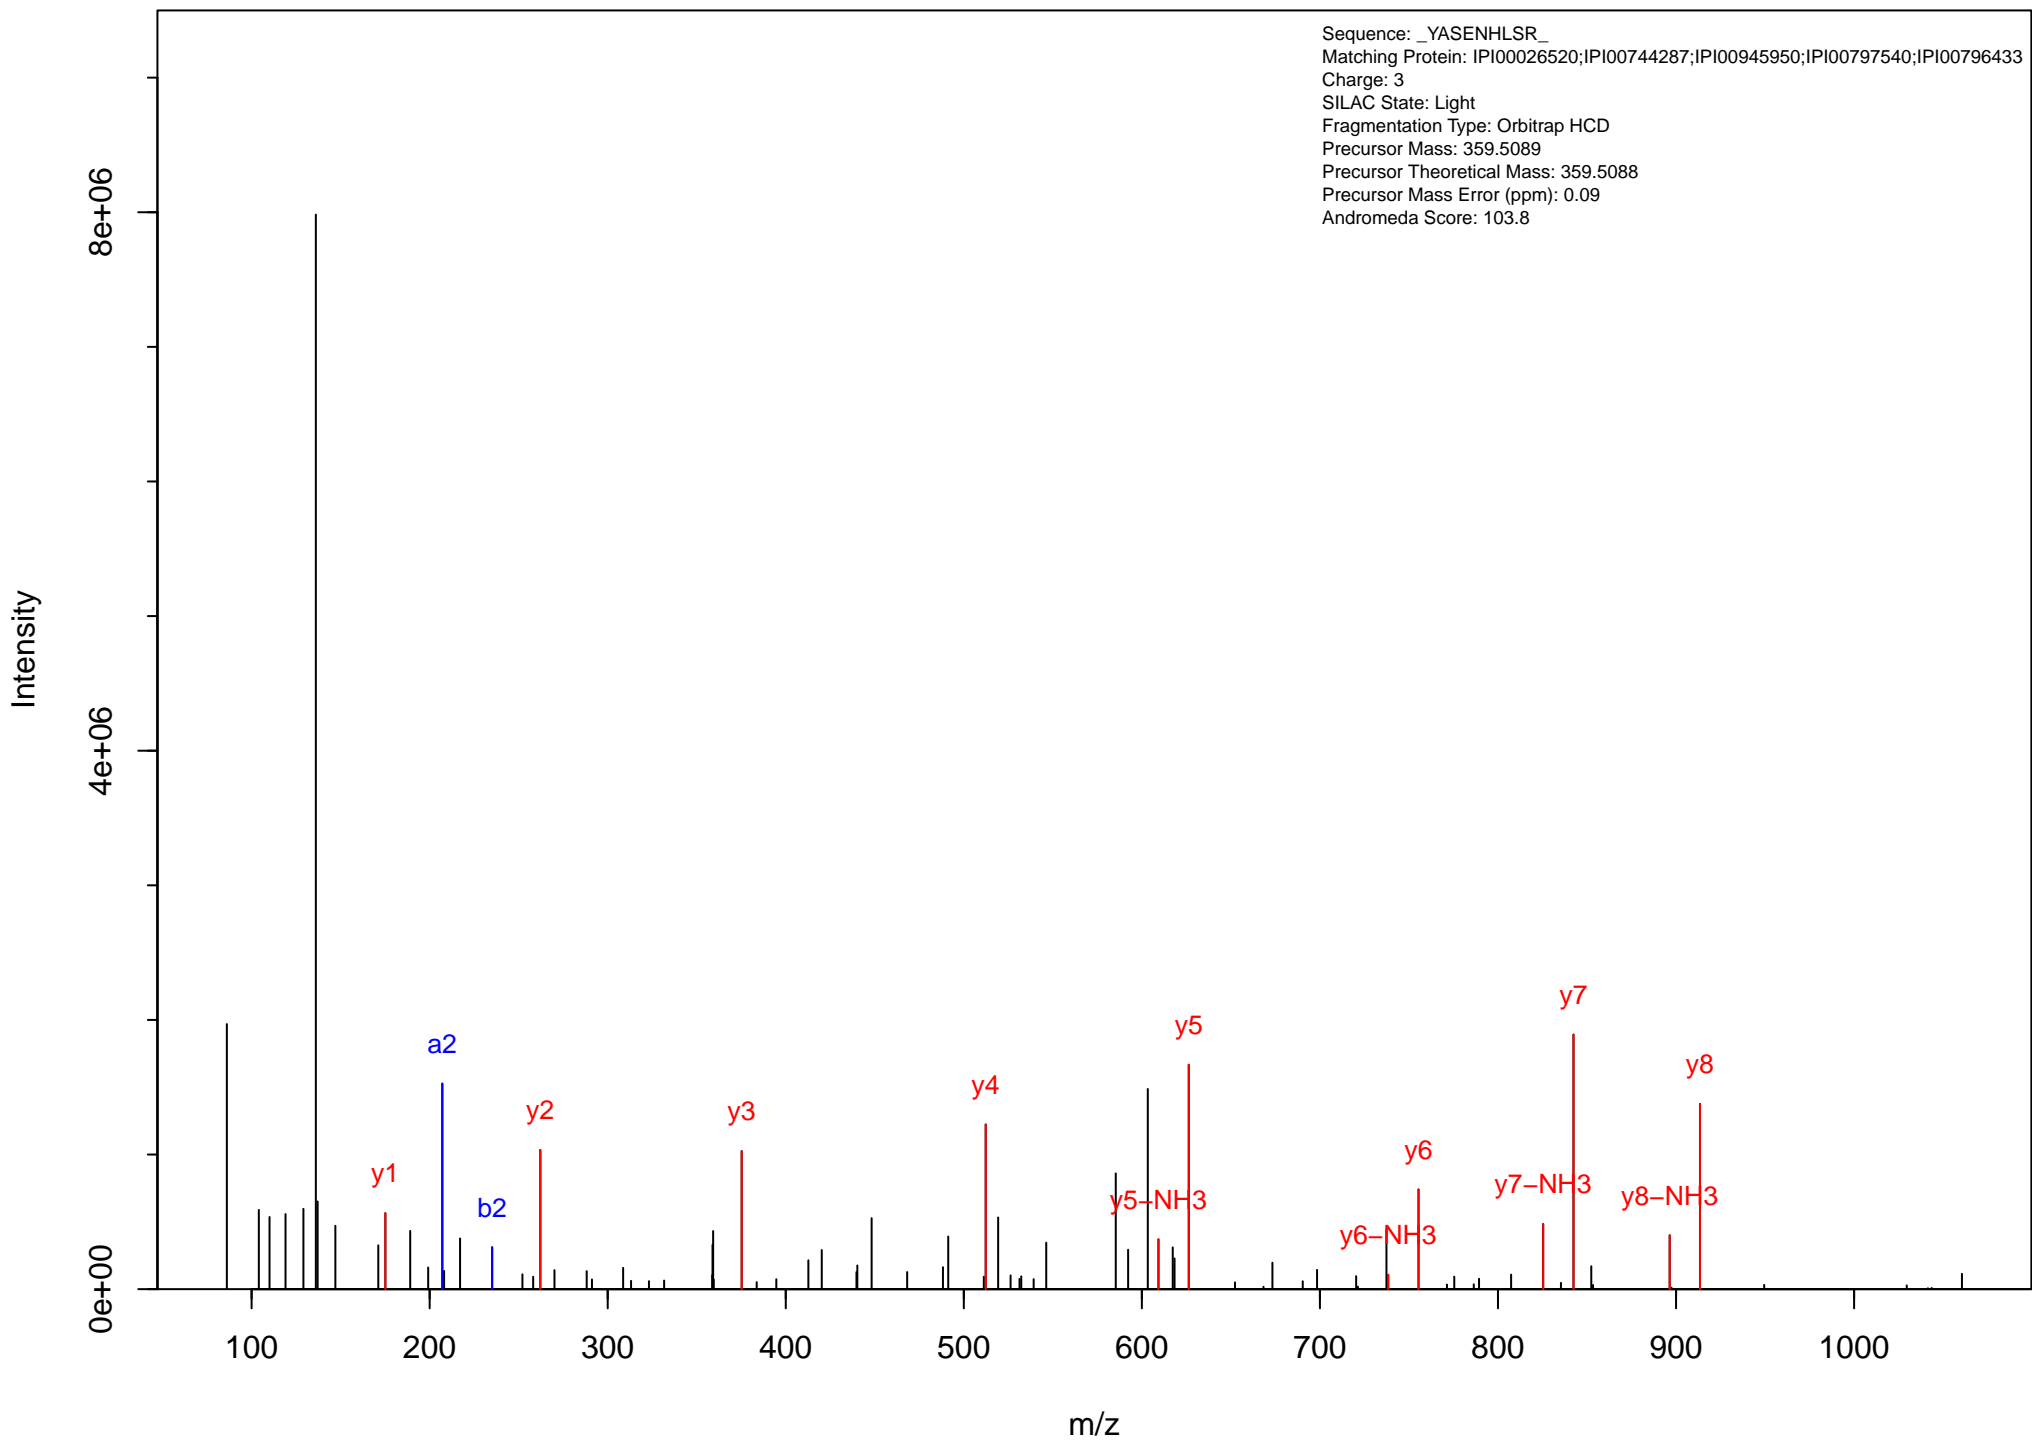

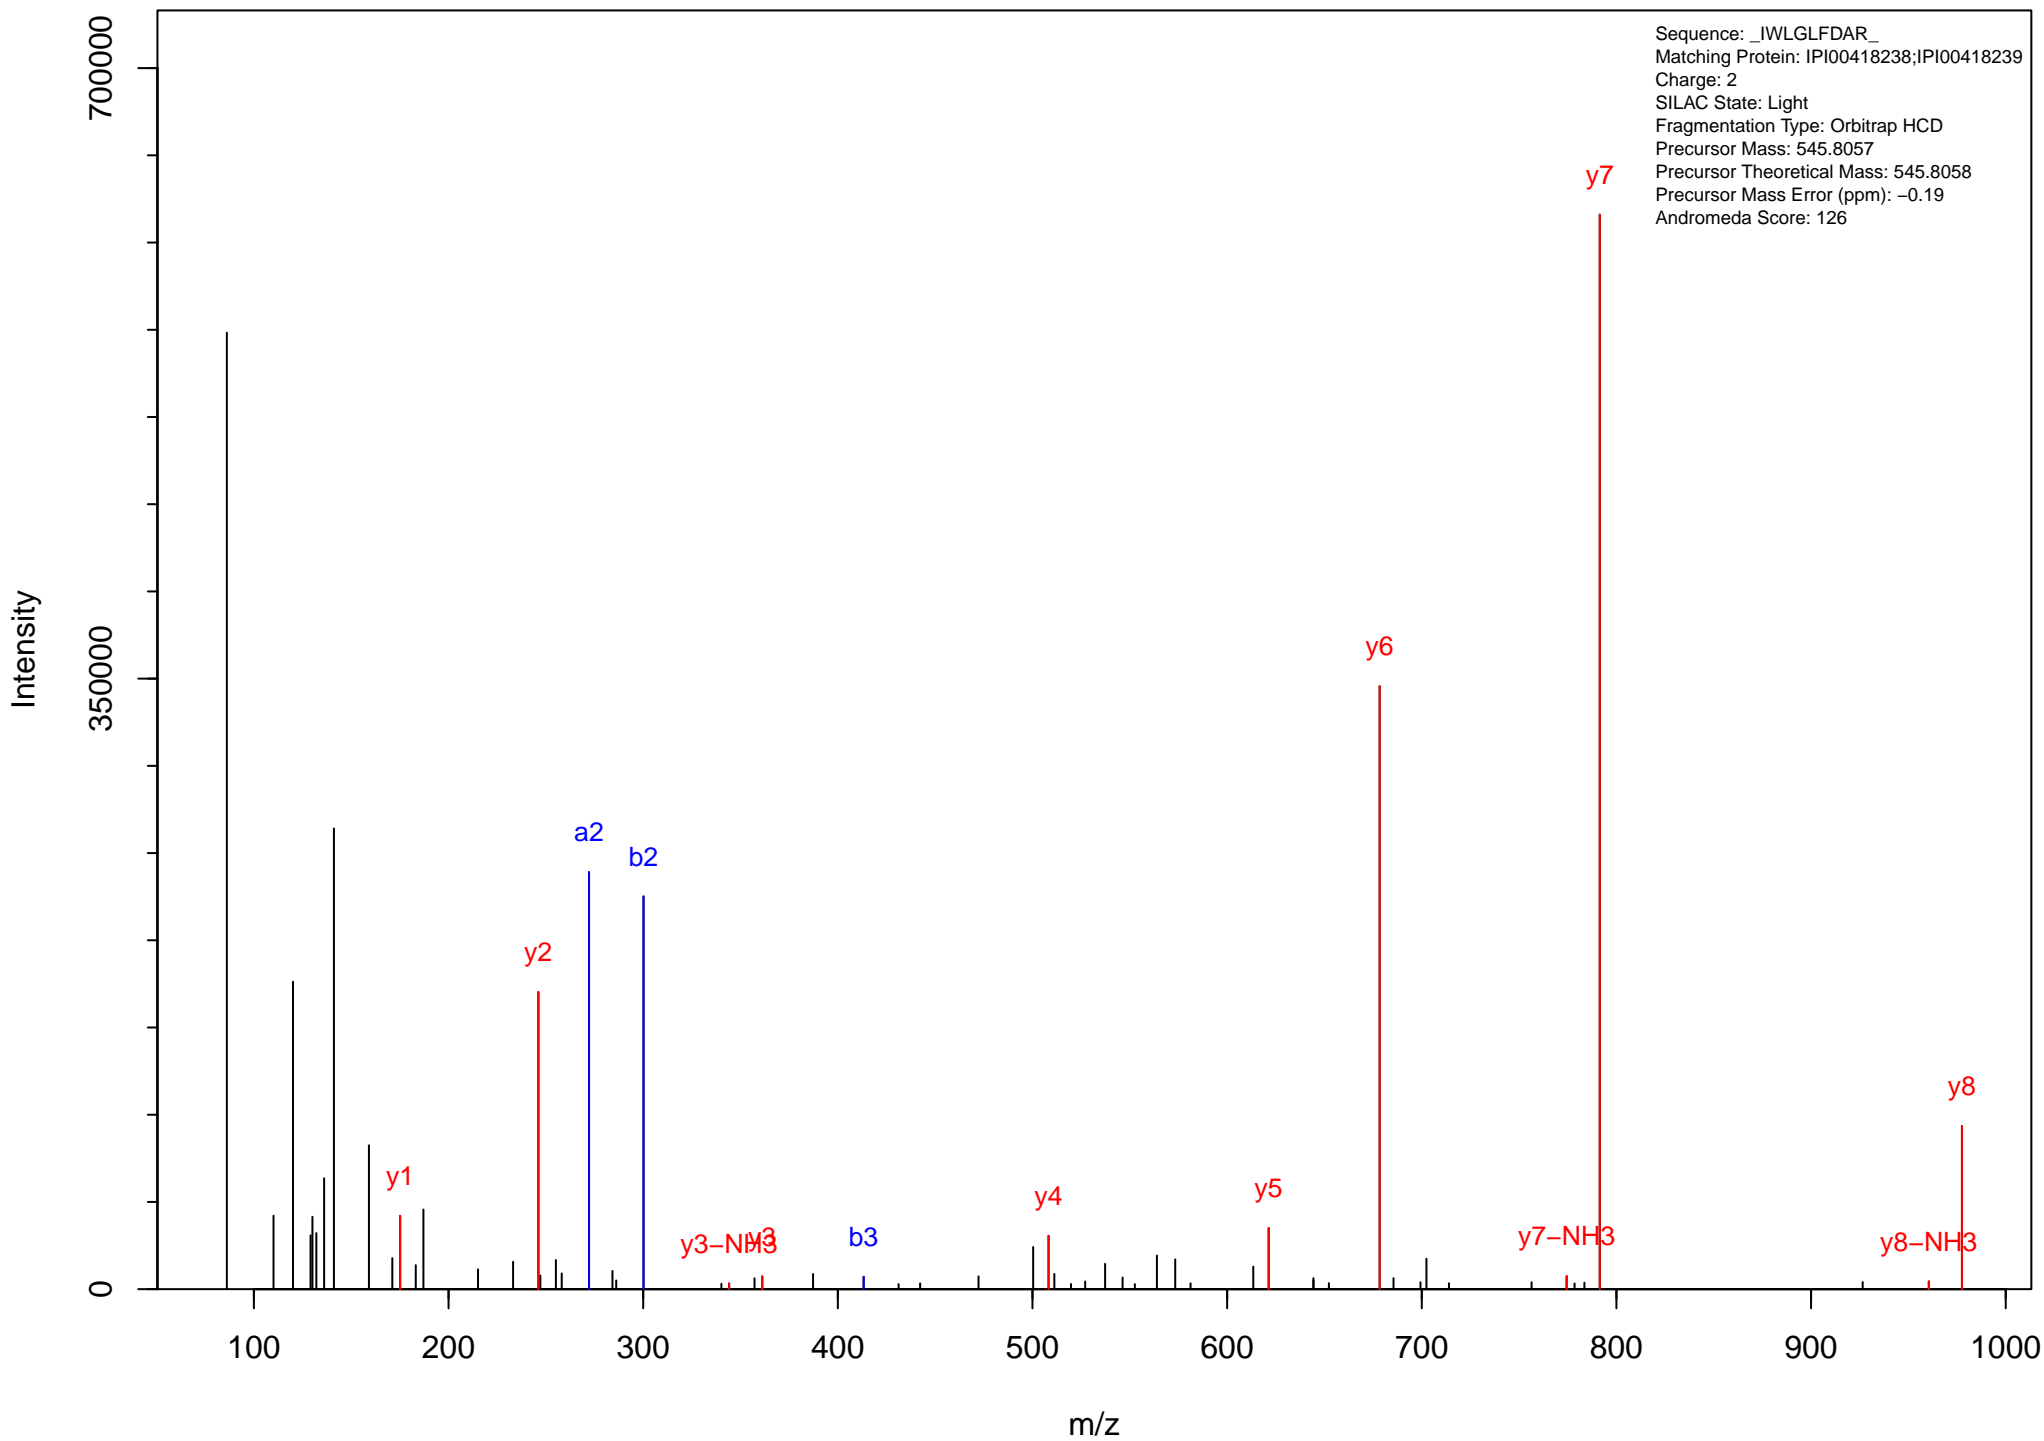

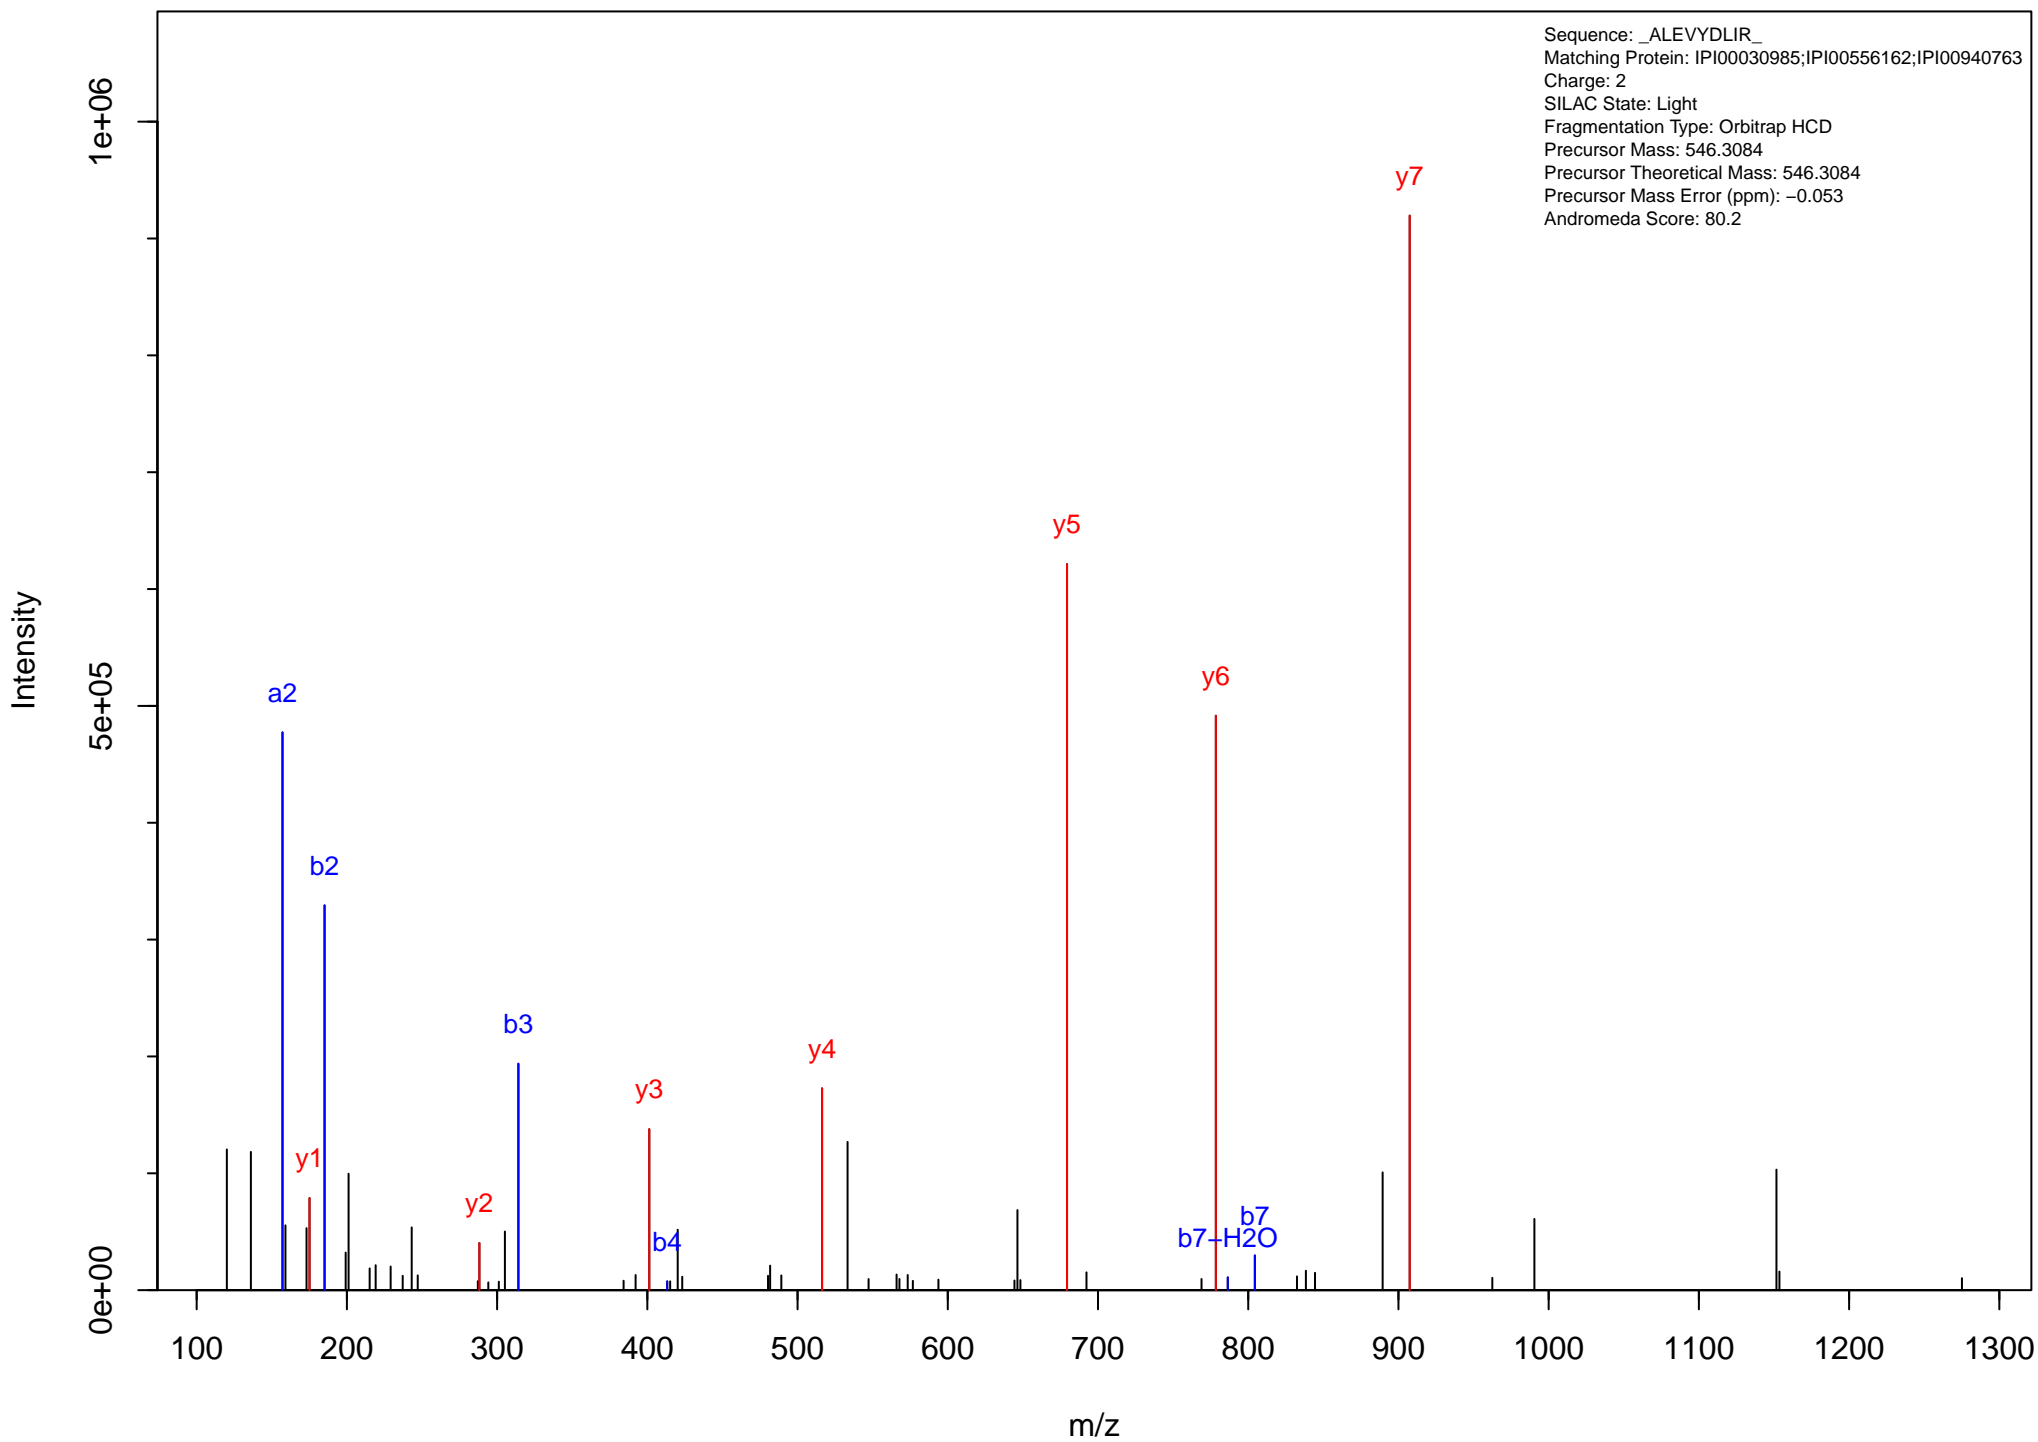

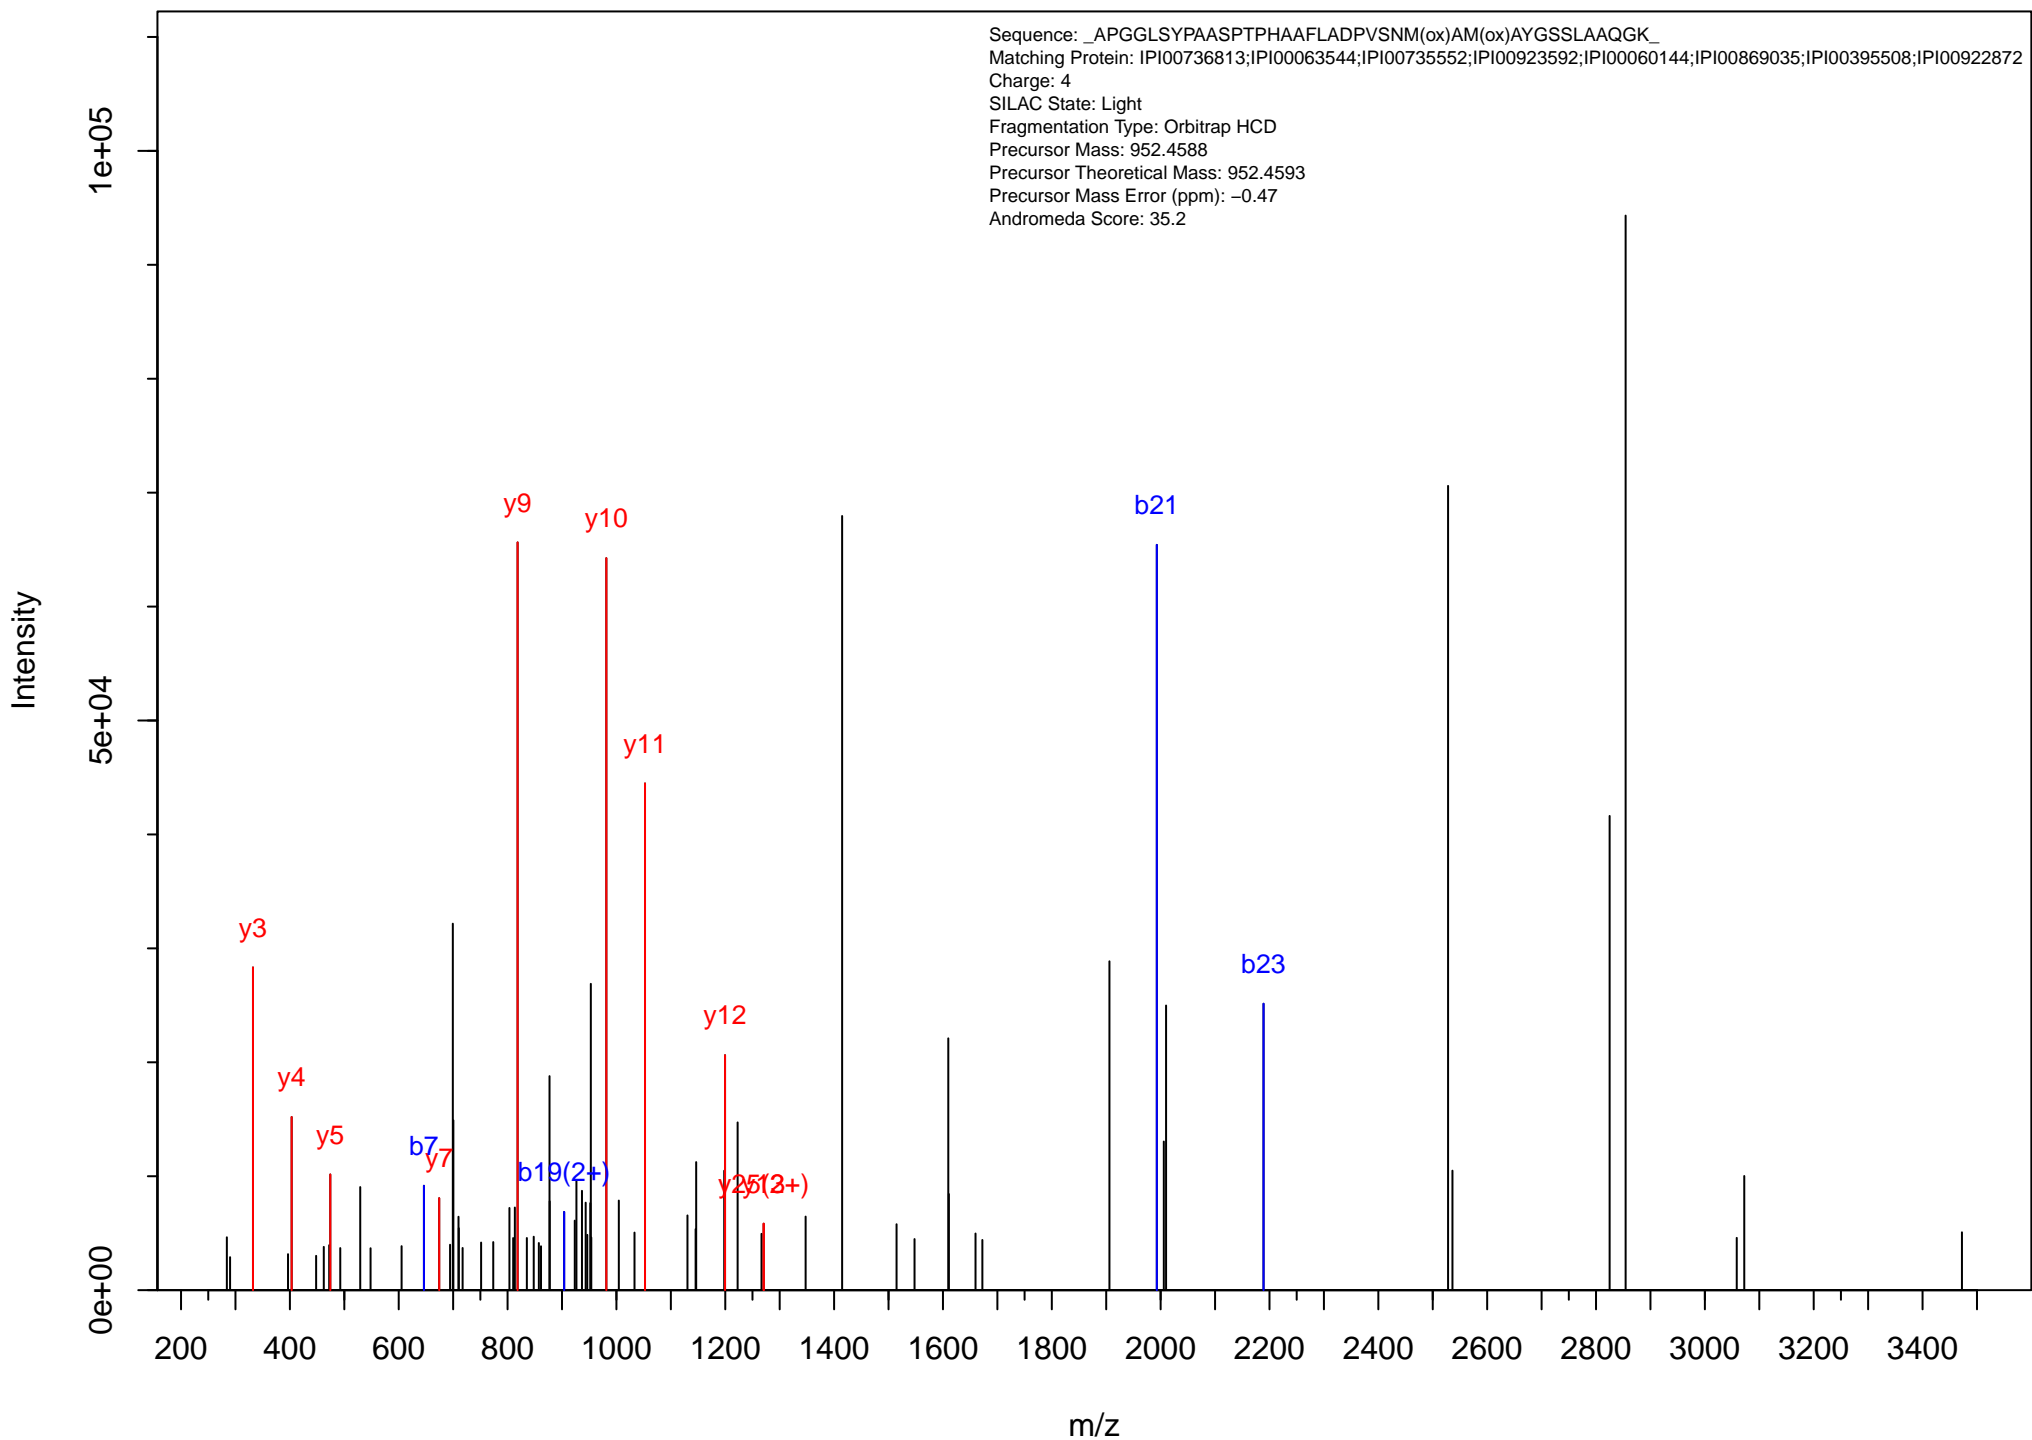

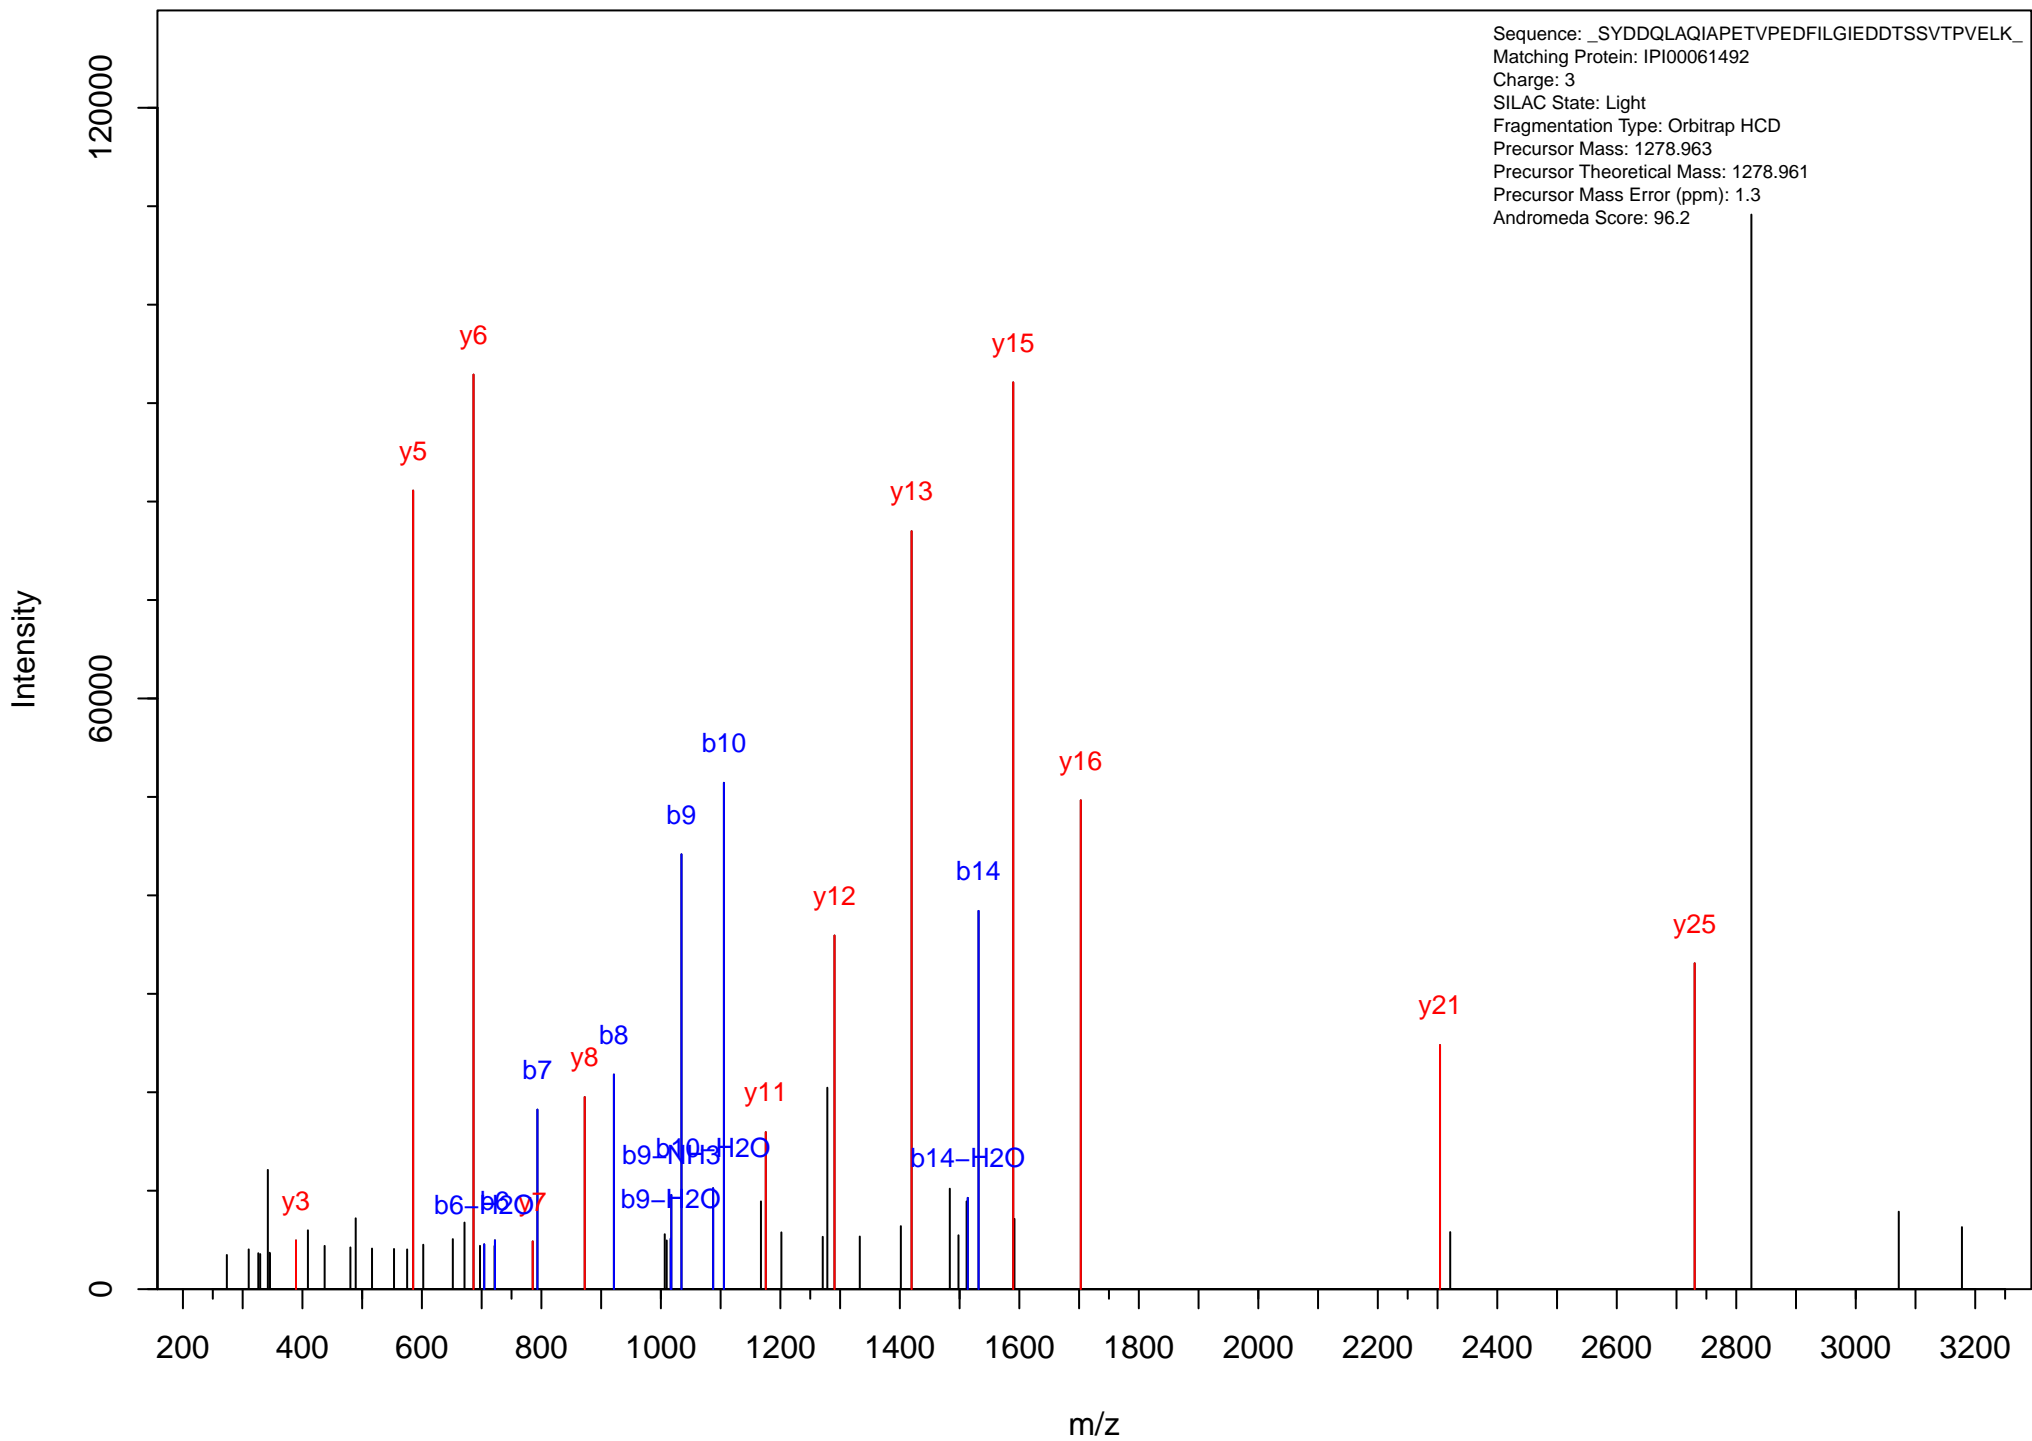

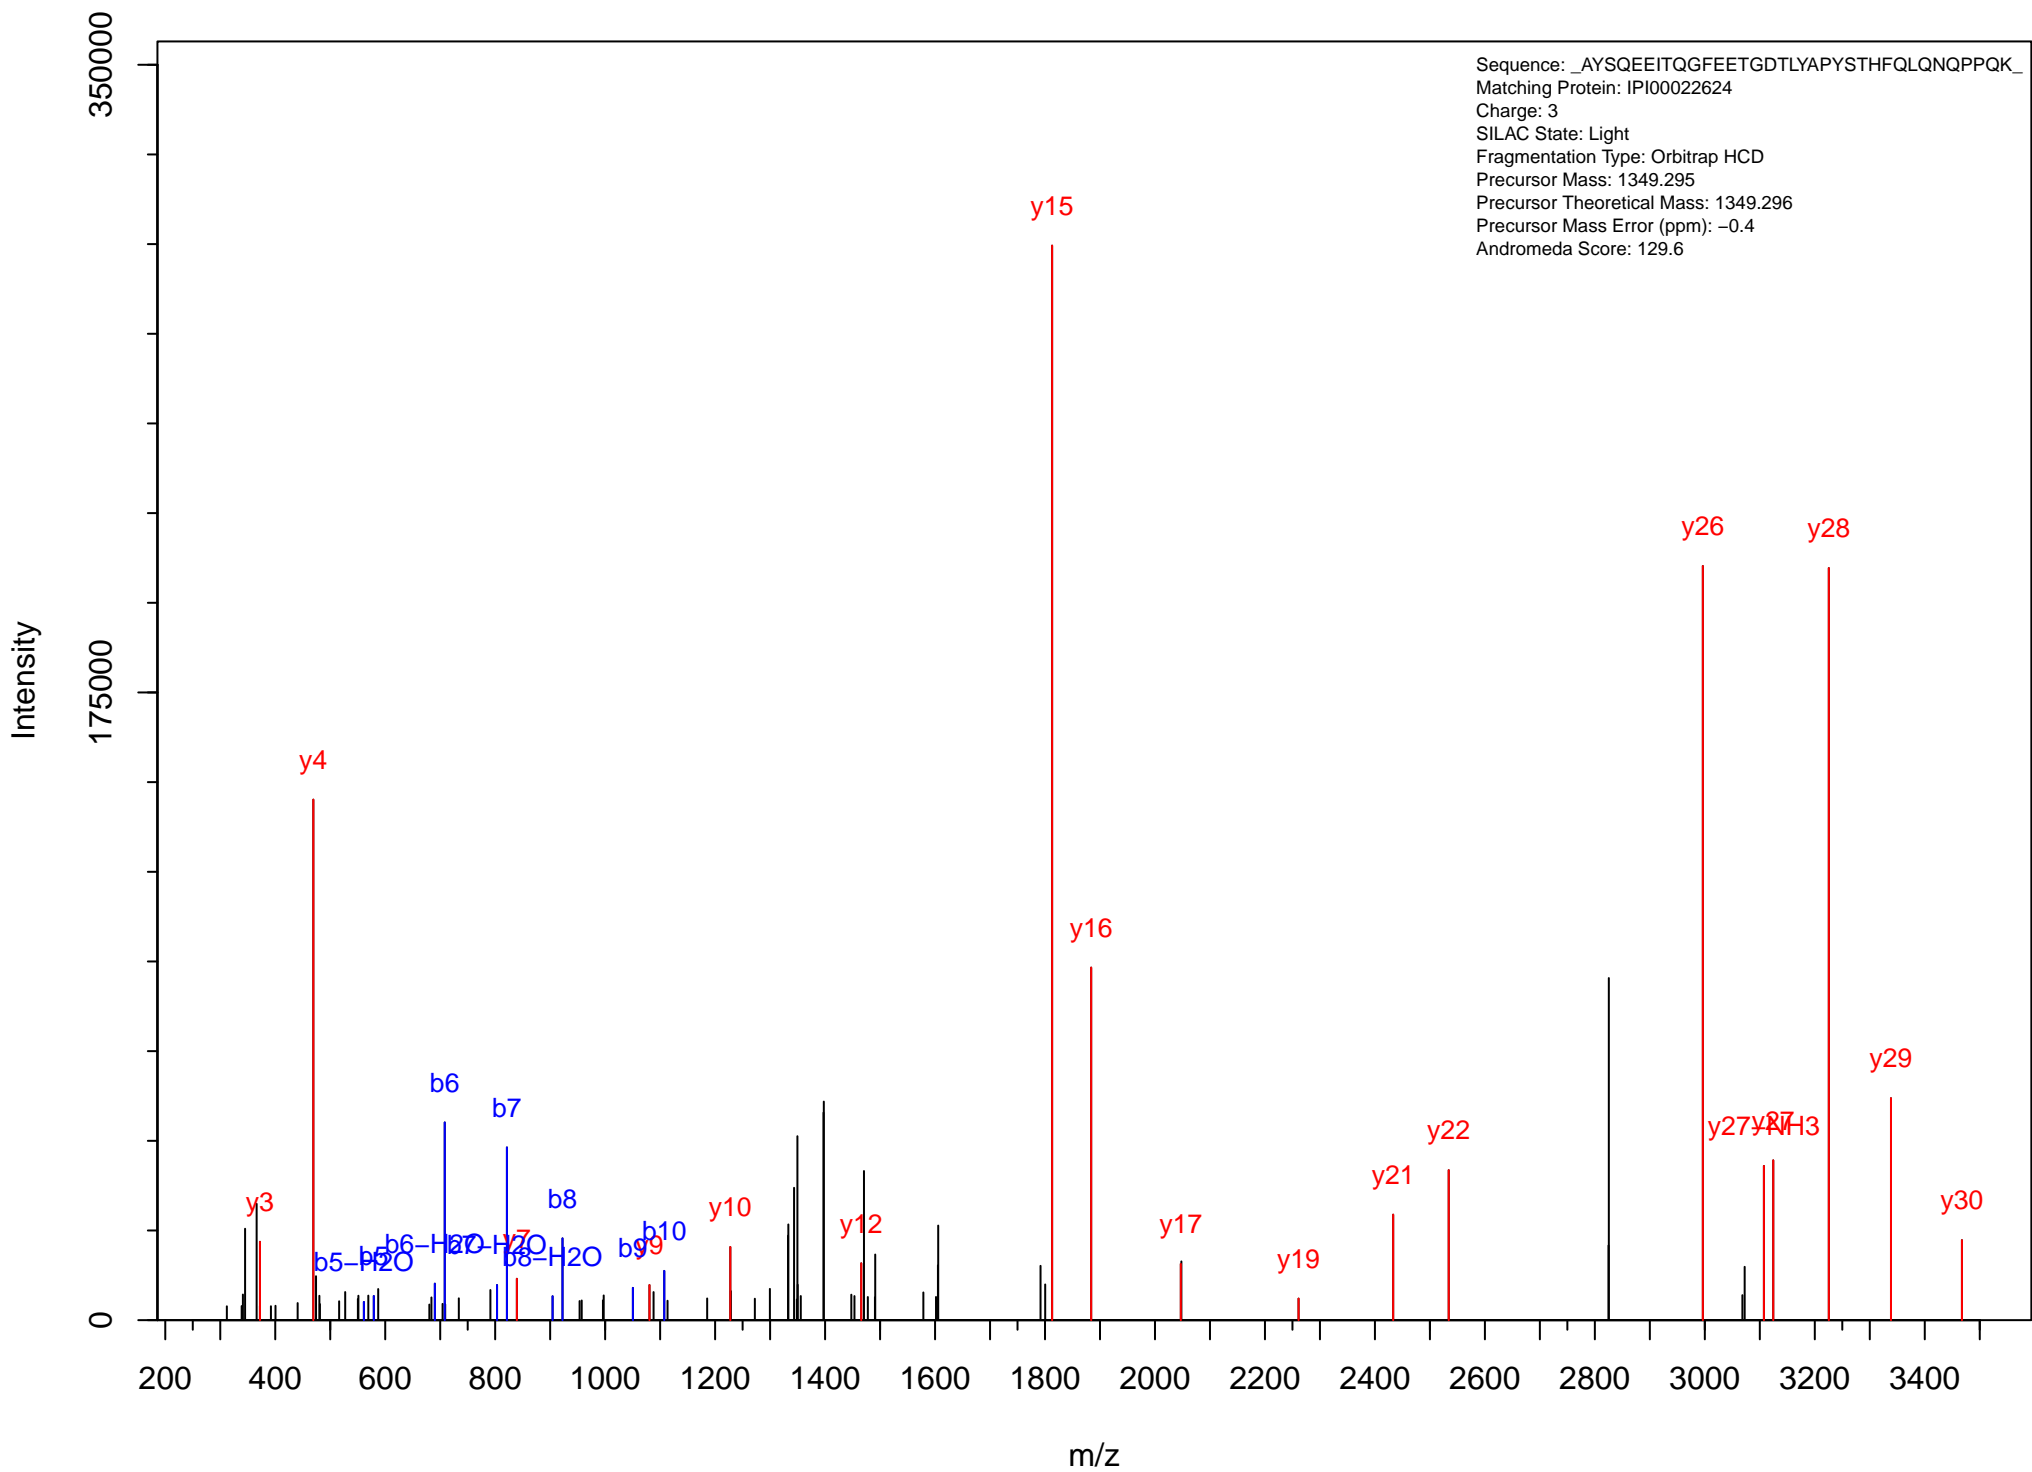

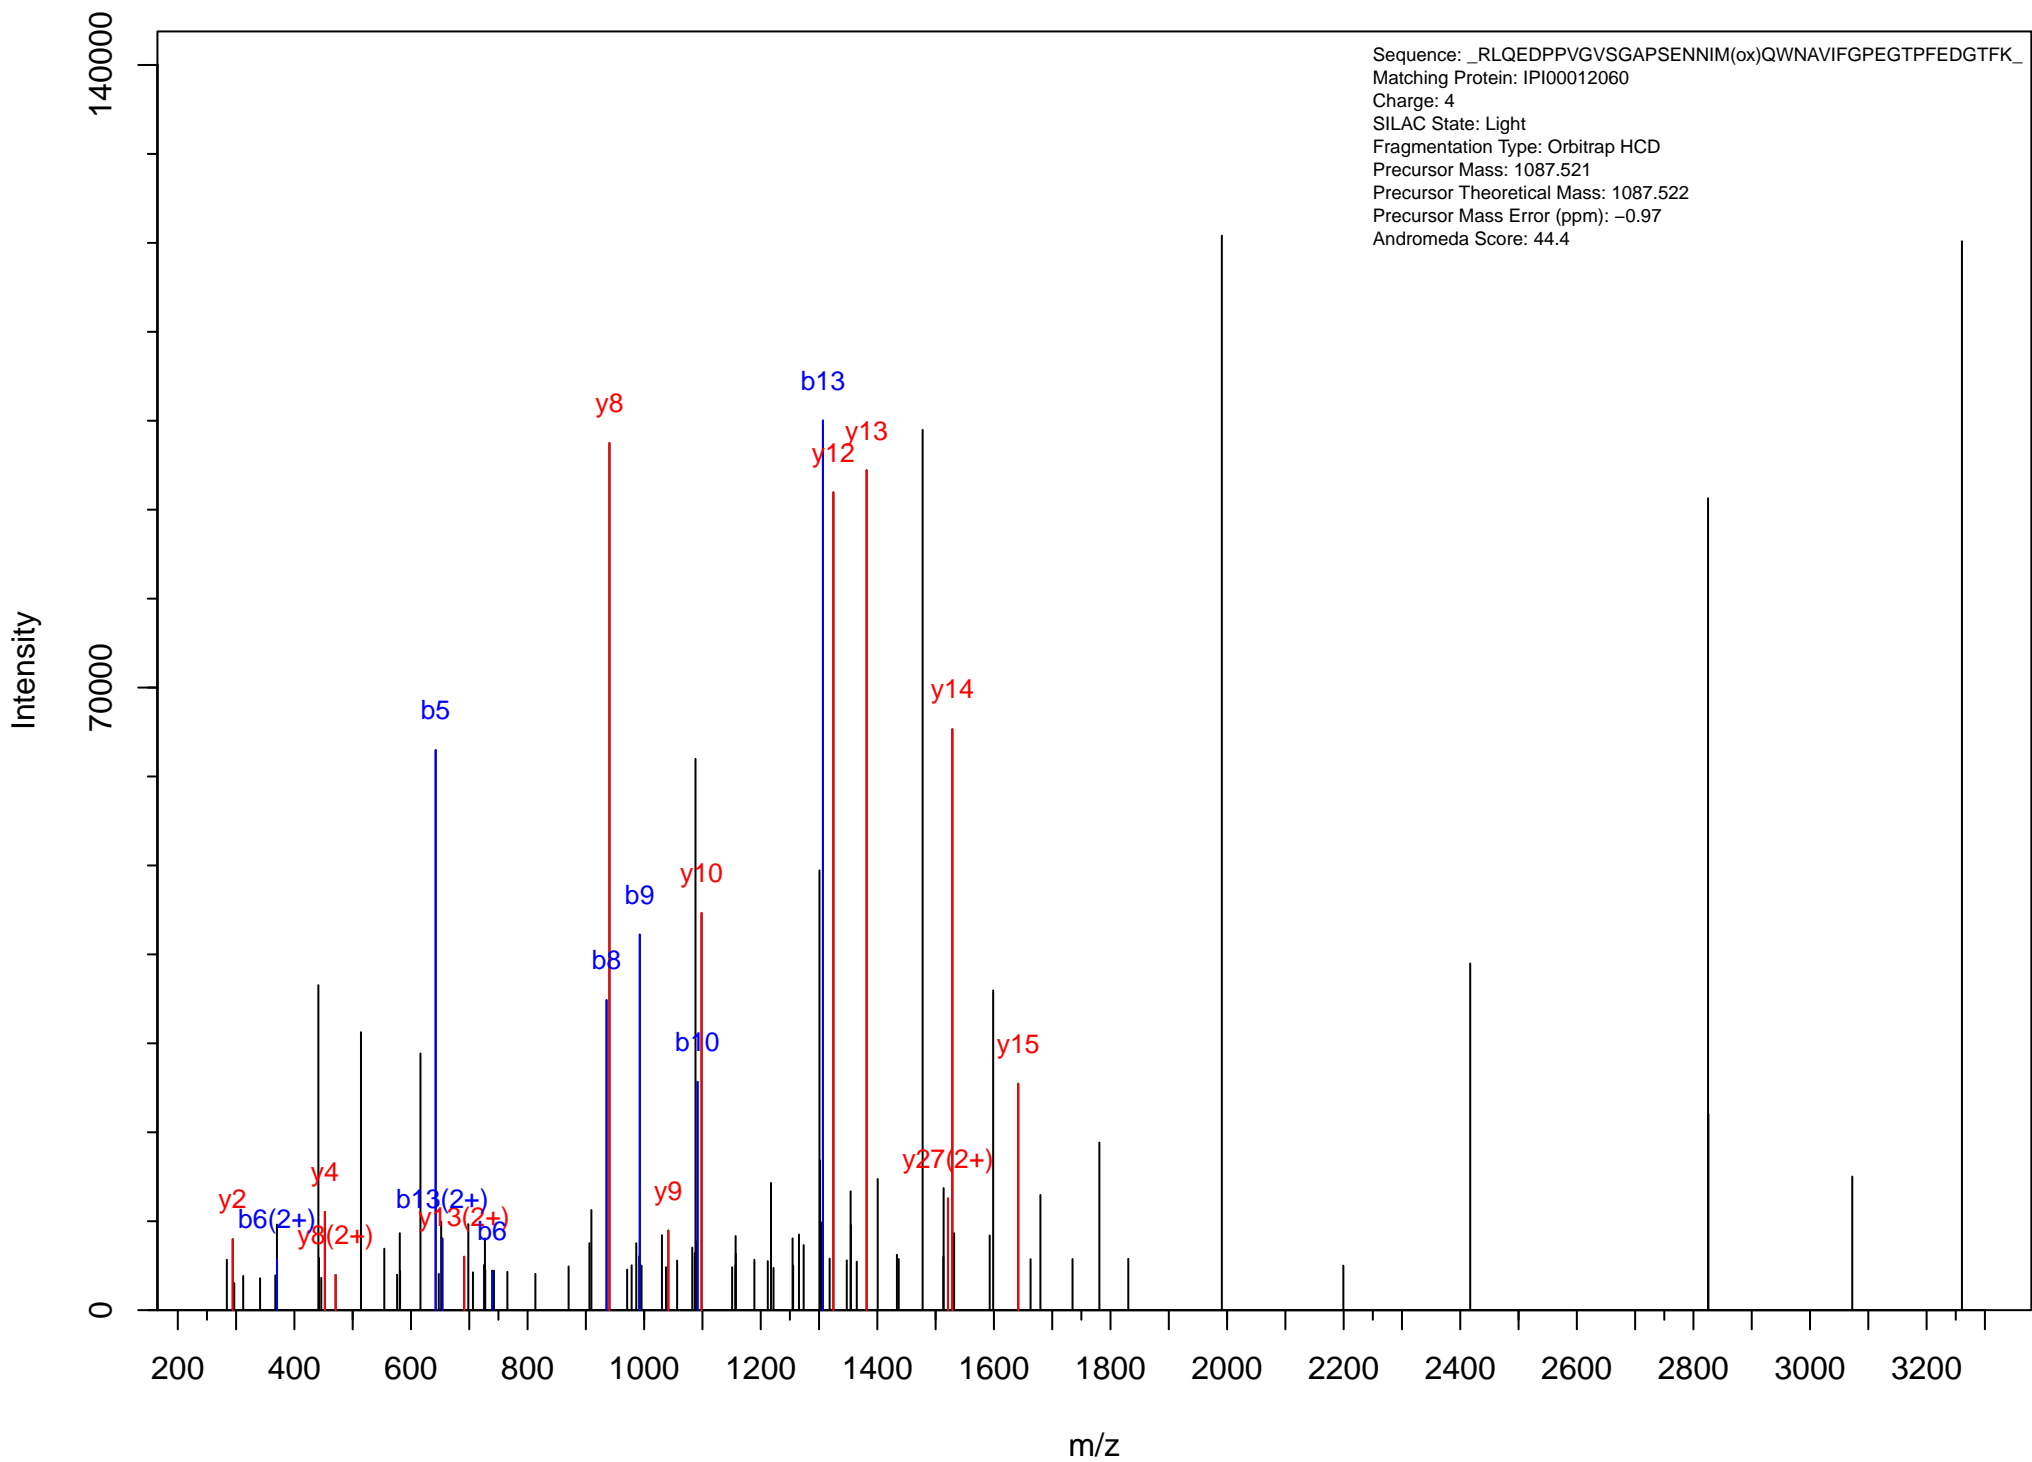

Intensity

2e+06

1e+06

0e+00

Sequence: \_QLQPSTPLQM(ox)ETCAPGCEHFKGCHTGHTRCLDSFDER\_  
Matching Protein: IPI00888045;IPI00646644  
Charge: 6  
SILAC State: Light  
Fragmentation Type: Orbitrap HCD  
Precursor Mass: 772.5182  
Precursor Theoretical Mass: 772.5192  
Precursor Mass Error (ppm): -1.3  
Andromeda Score: 0.2

y1

y21(2+)

m/z

100

200

300

400

500

600

700

800

900

1000

1100

1200

1300

1400

1500

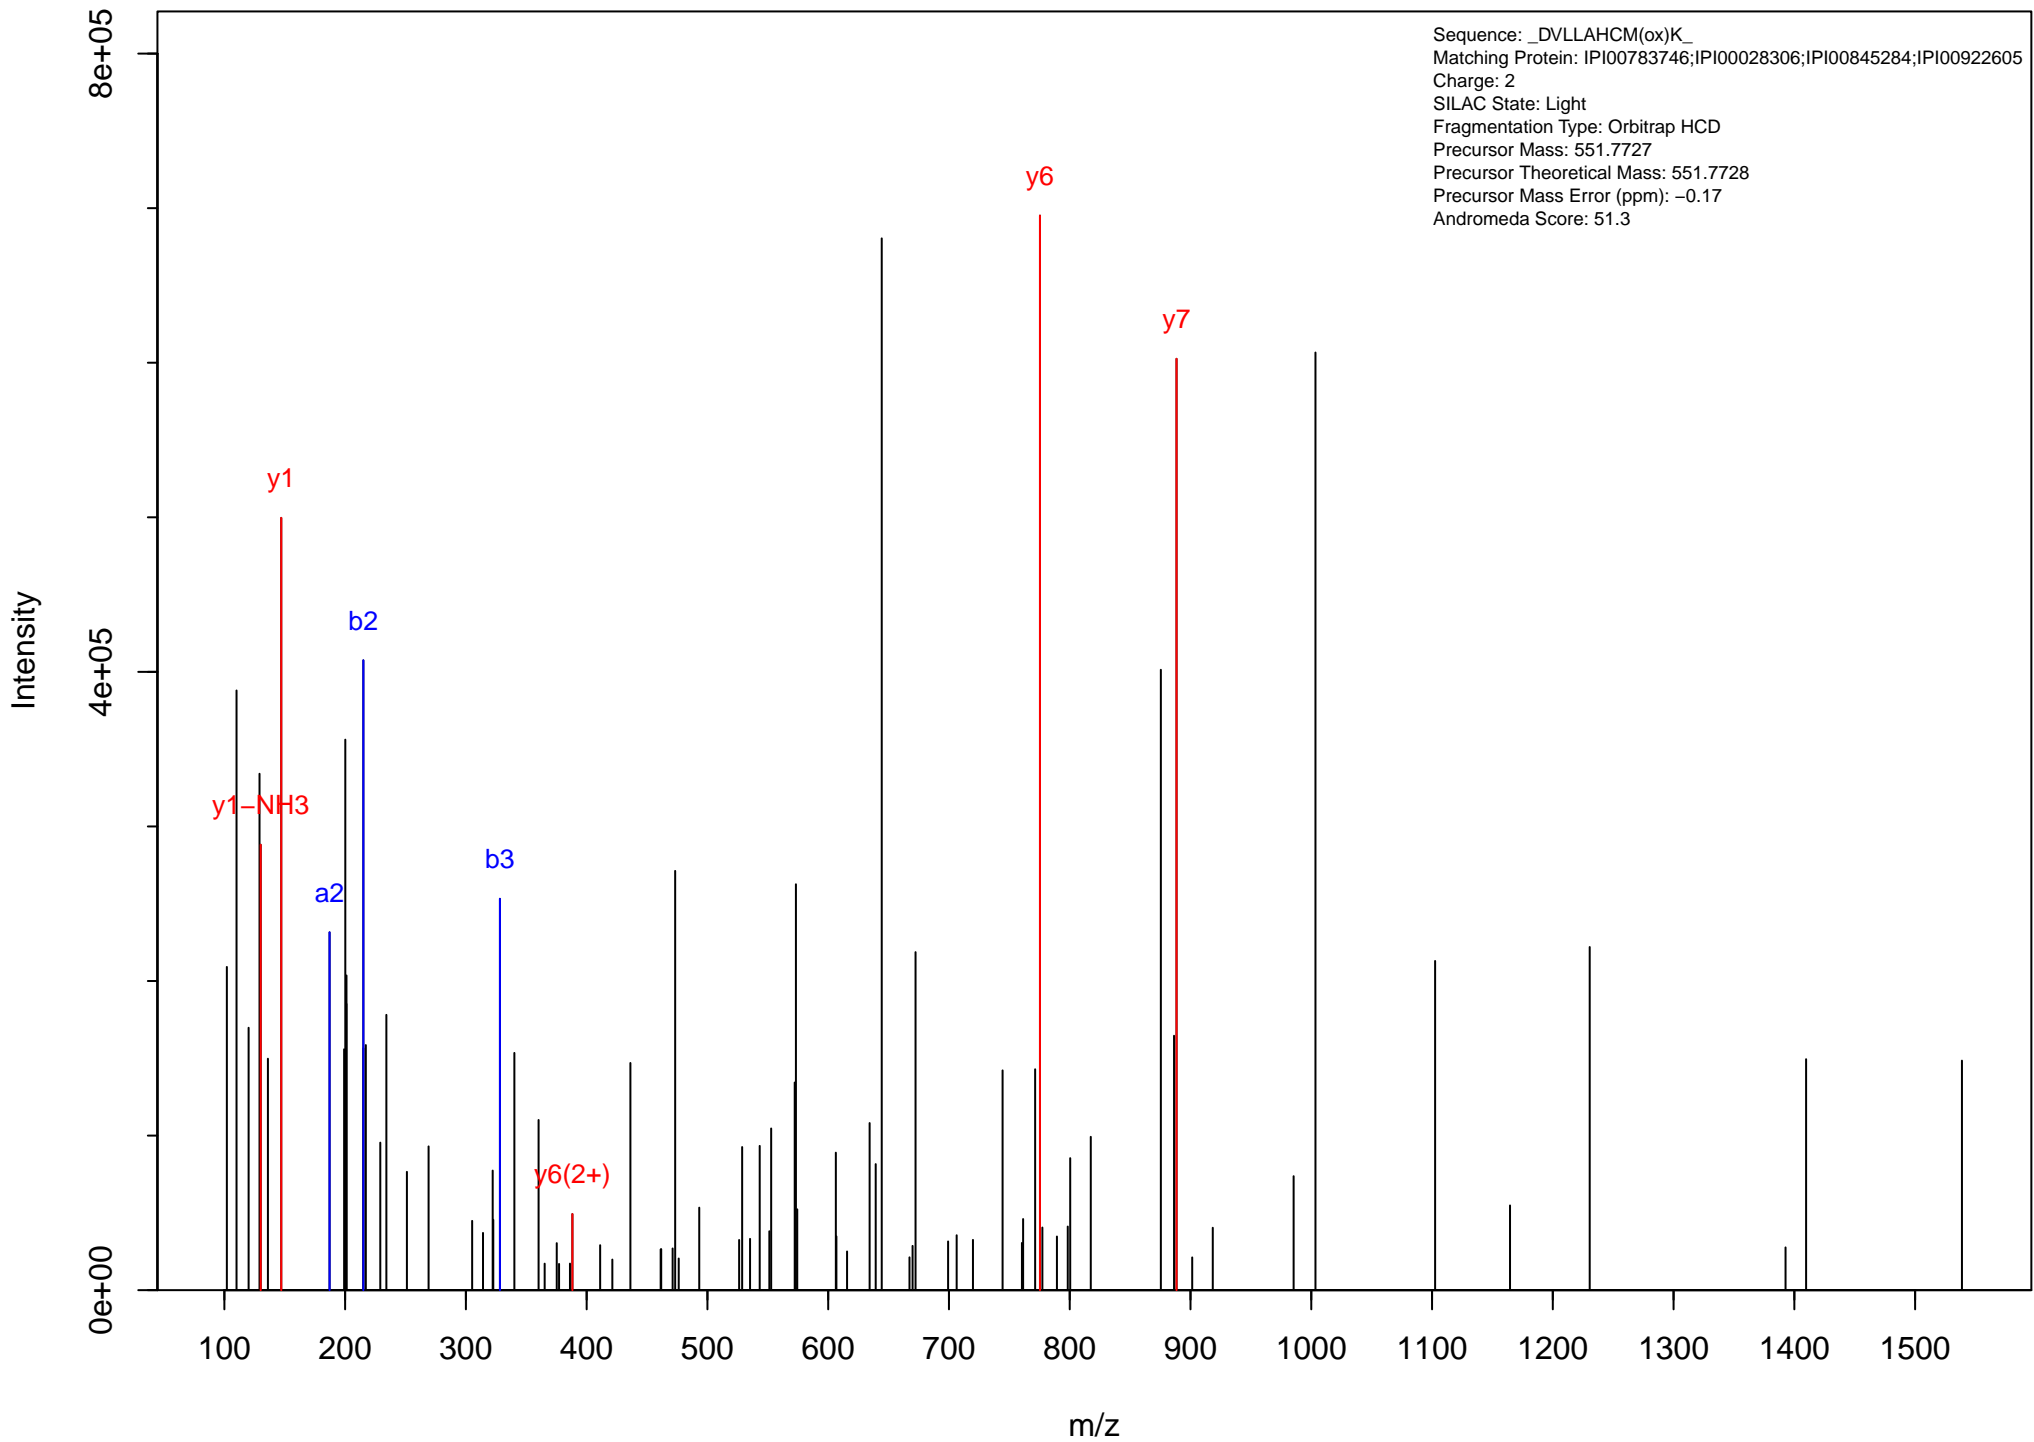

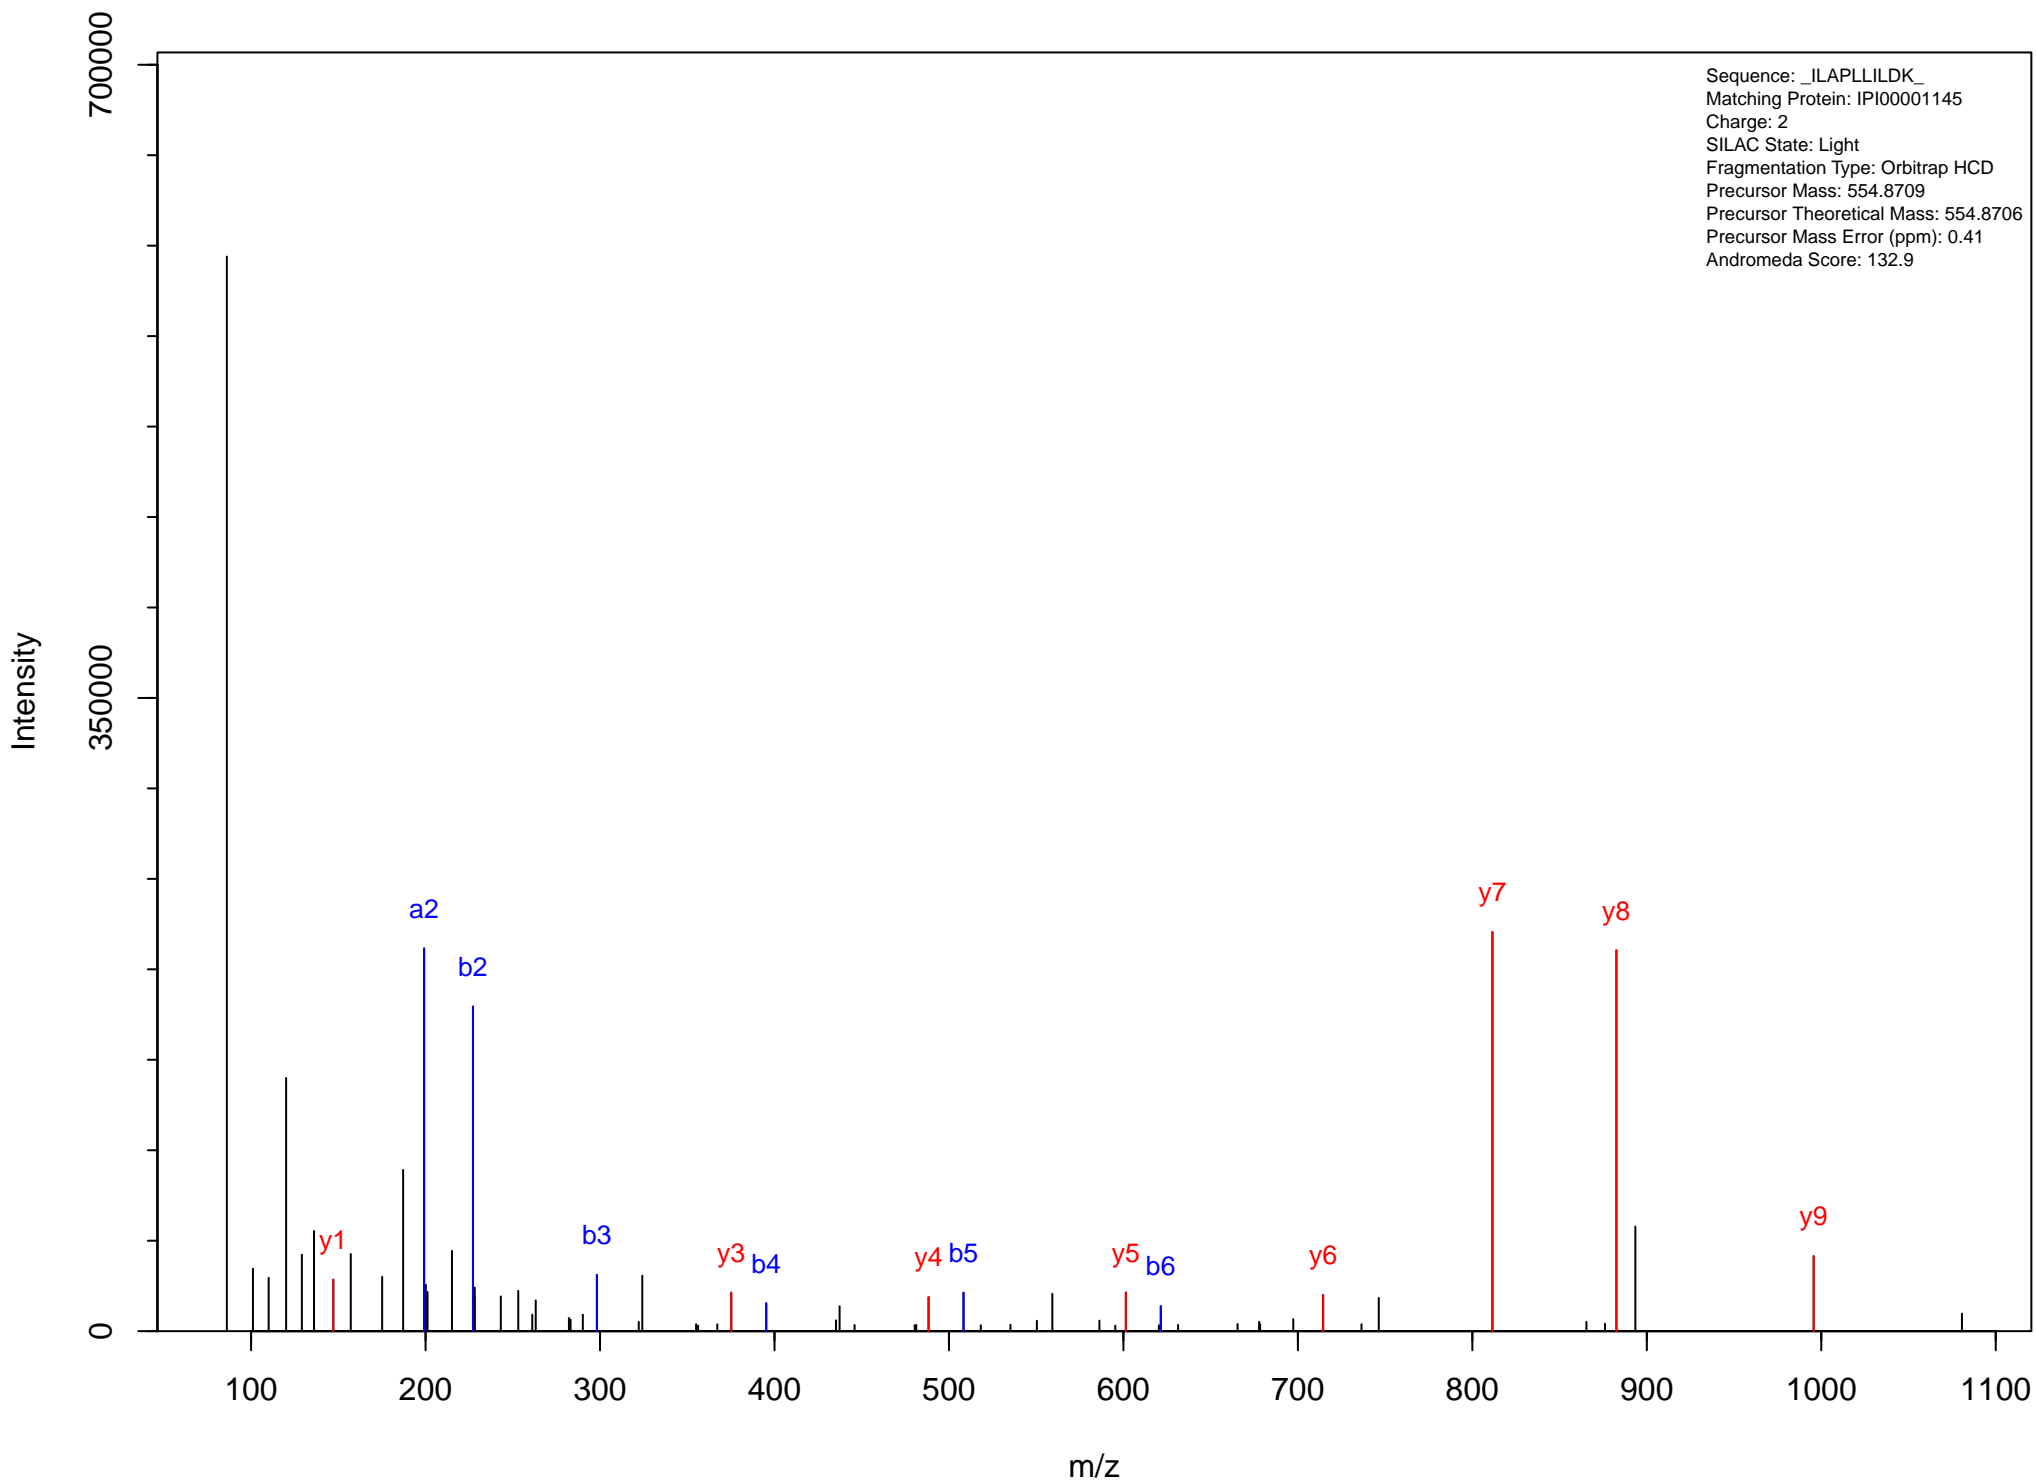

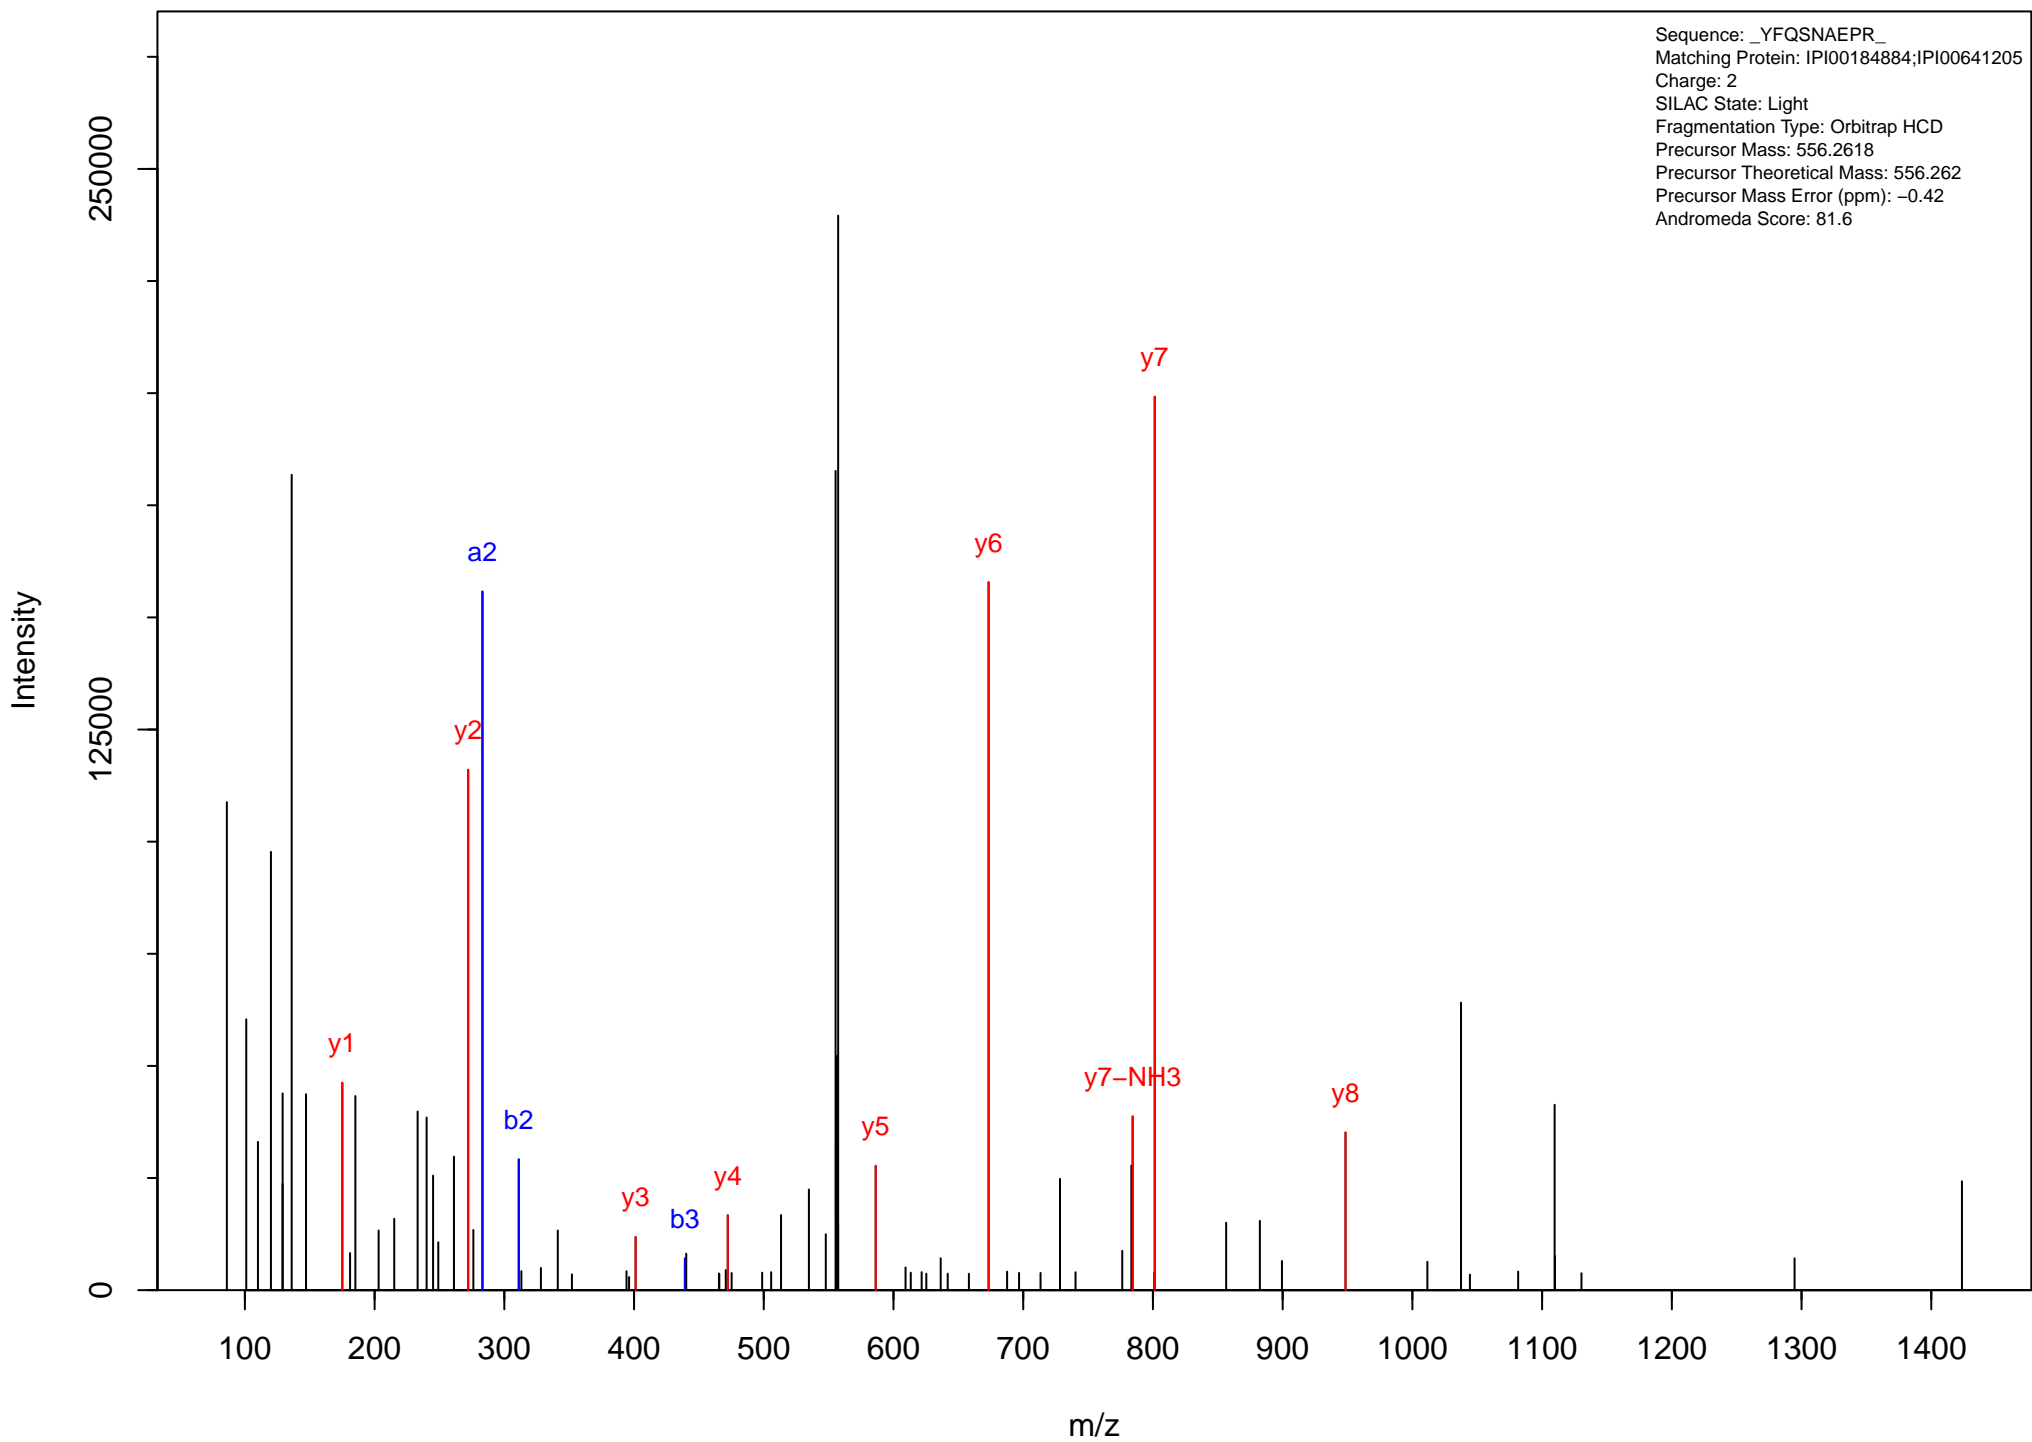

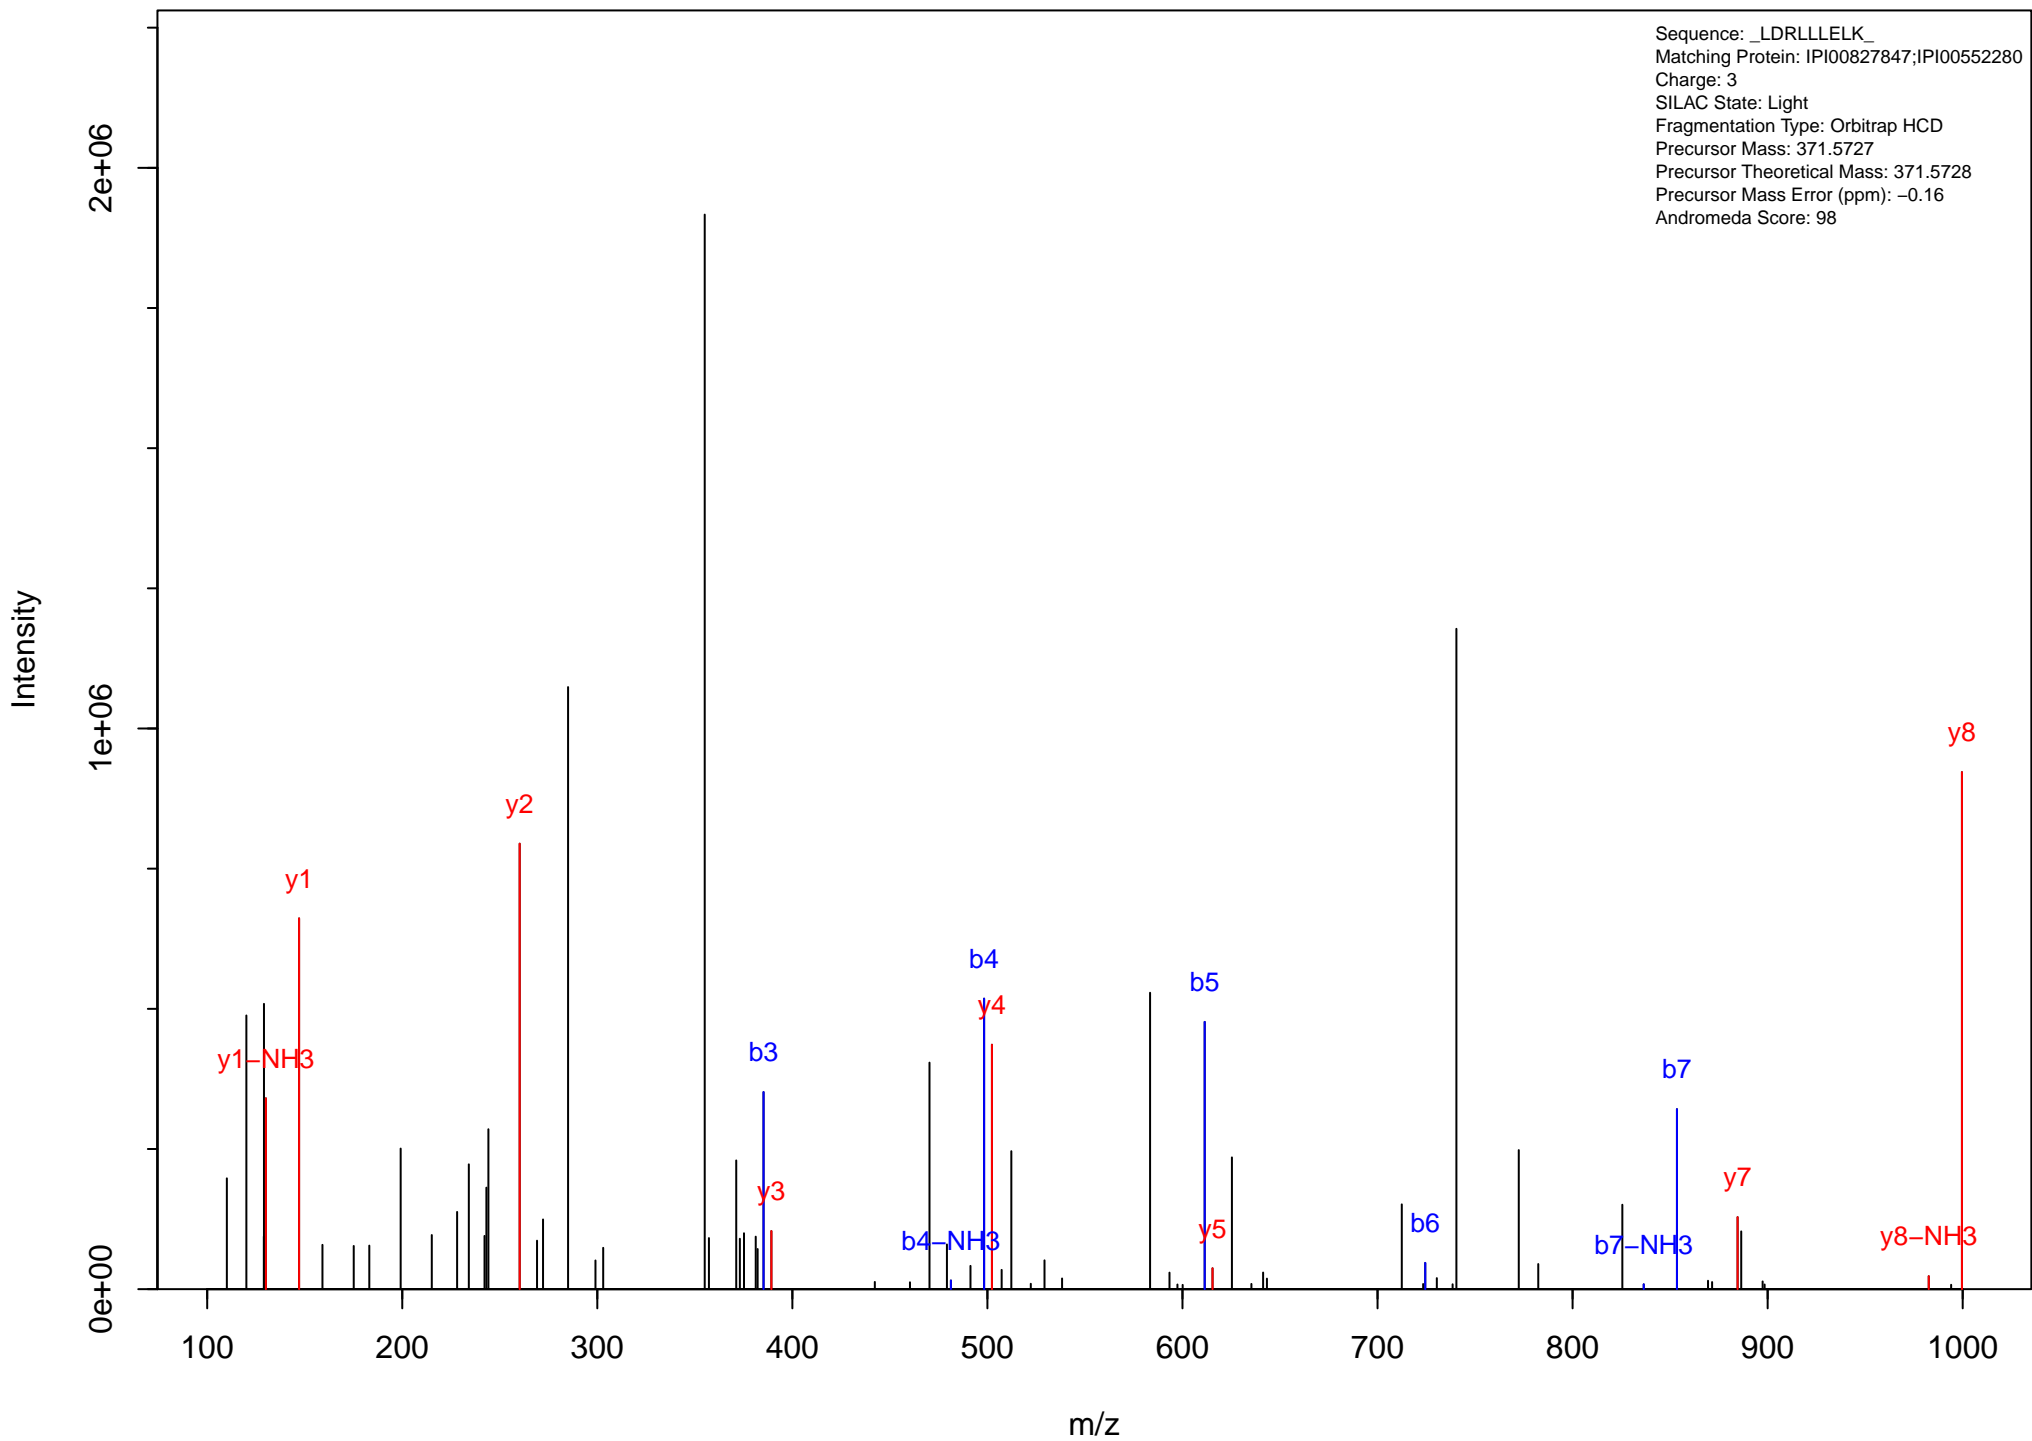

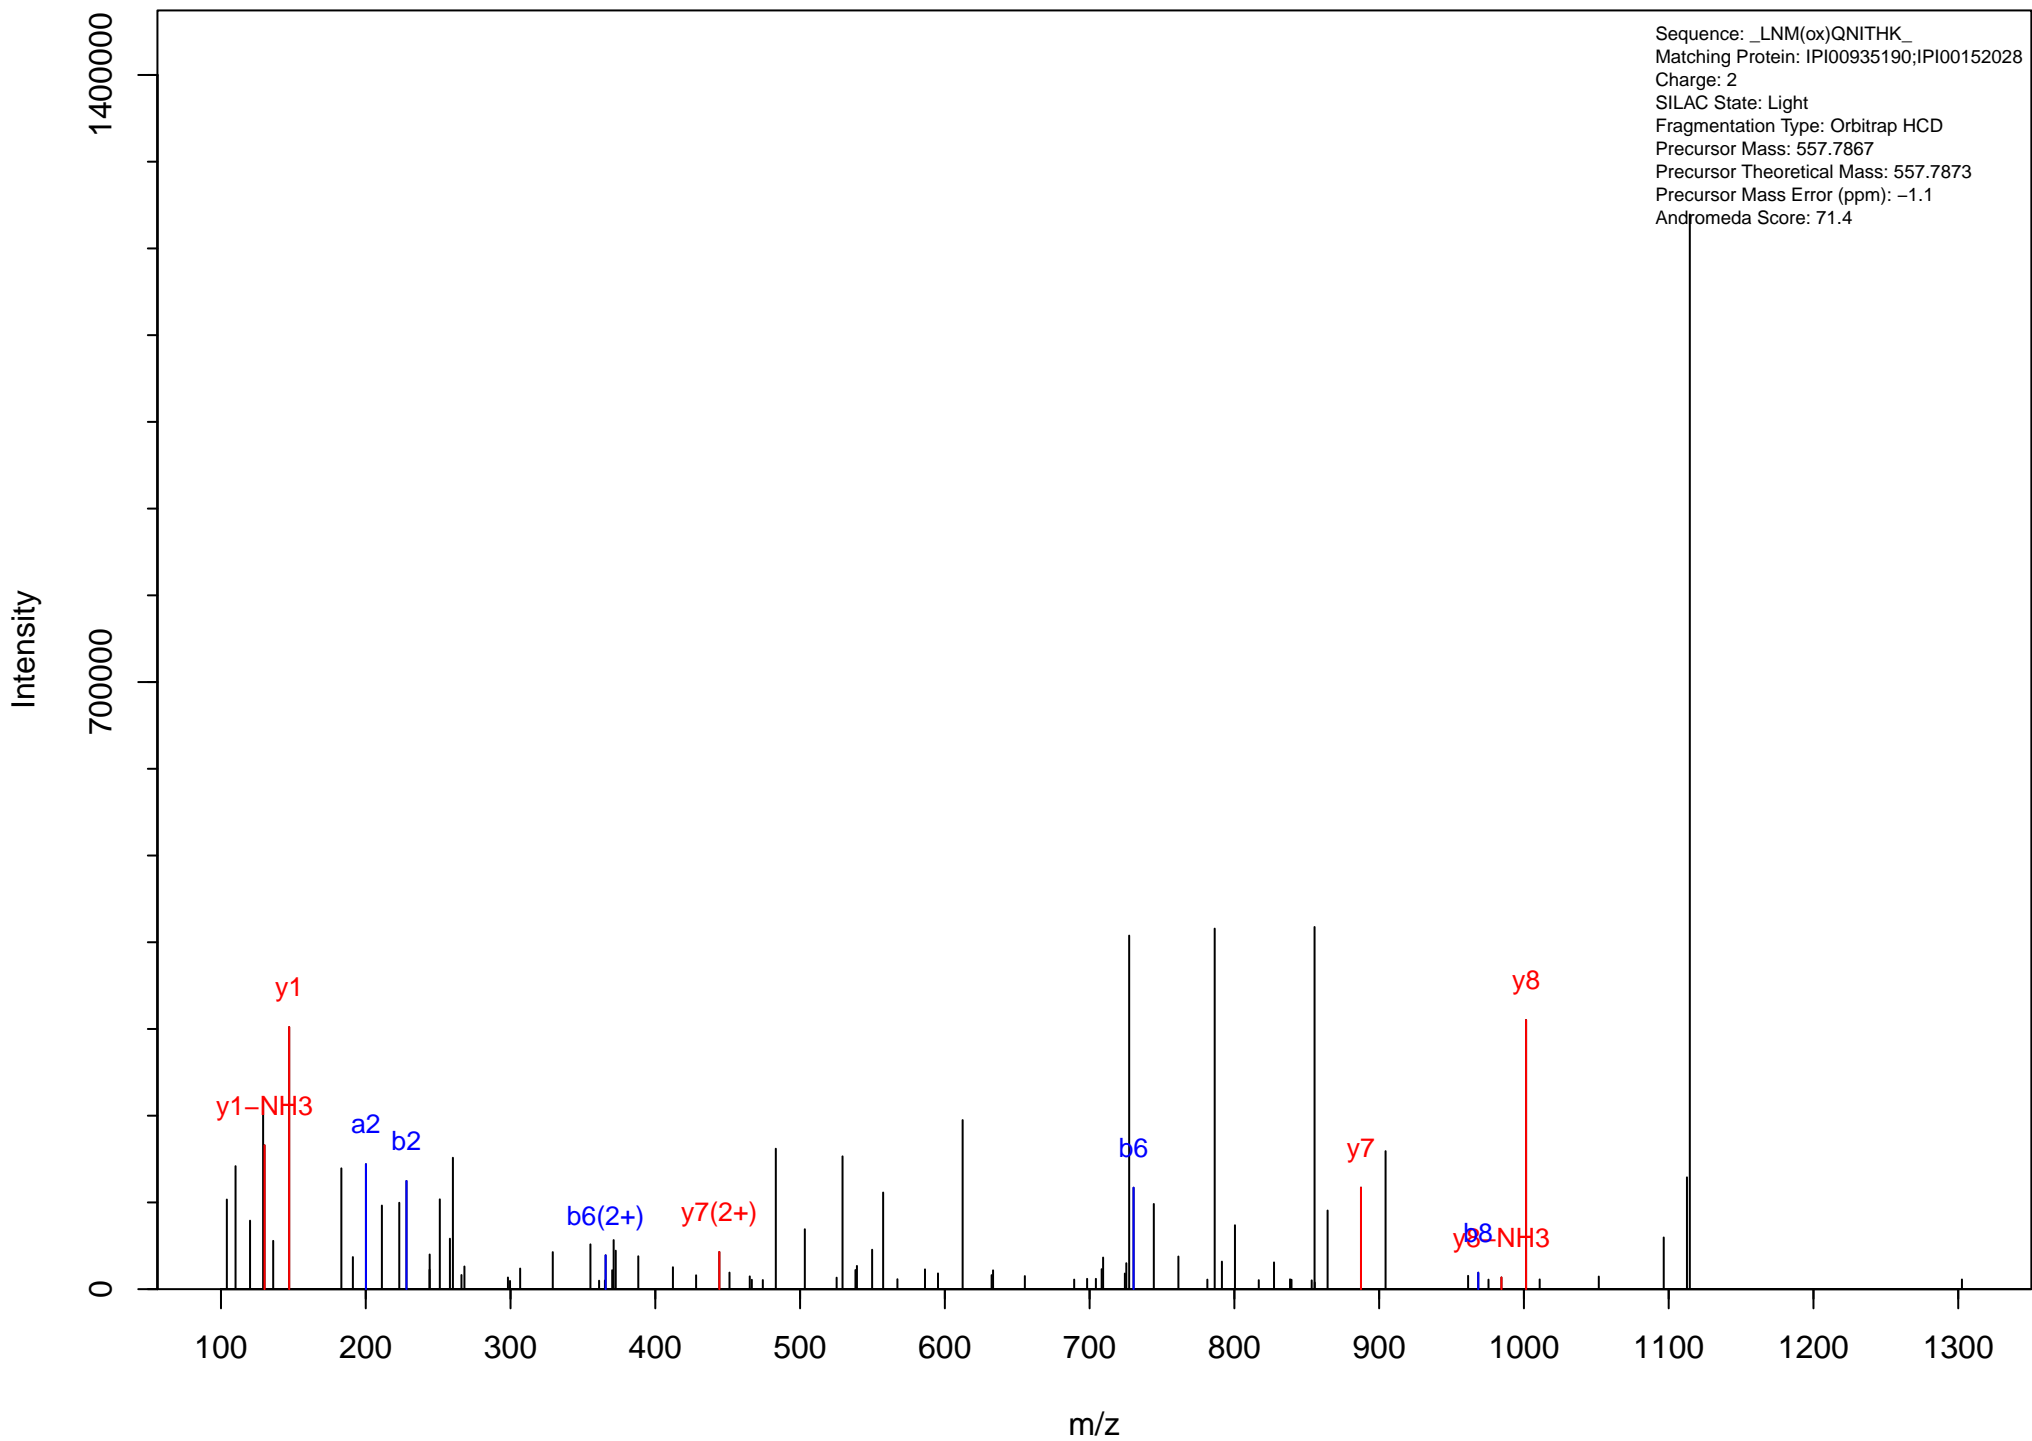

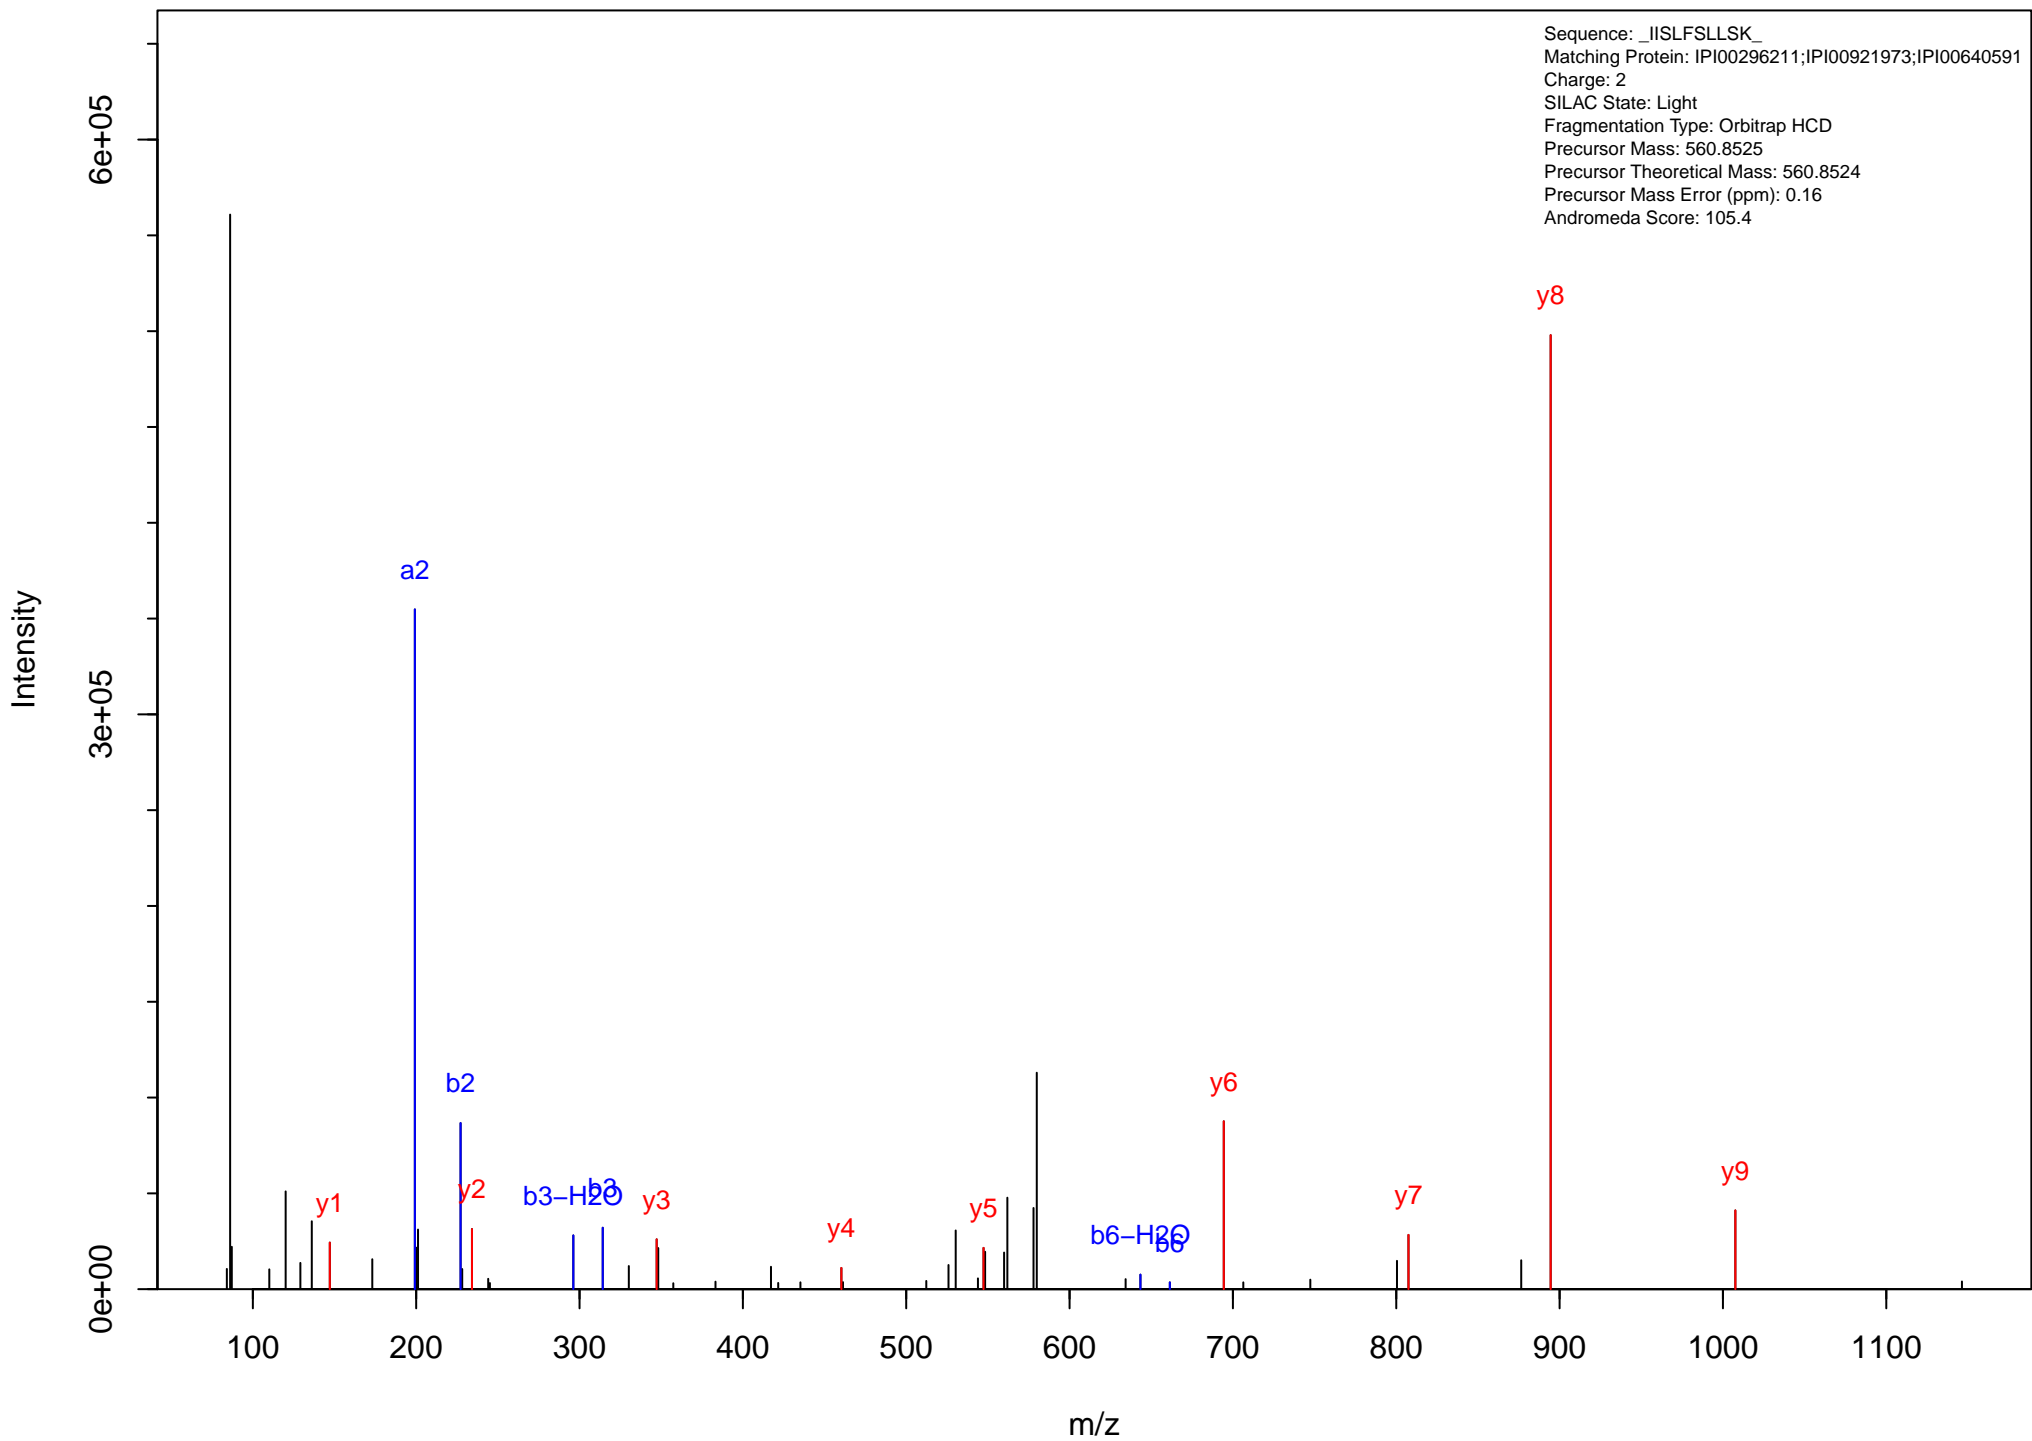

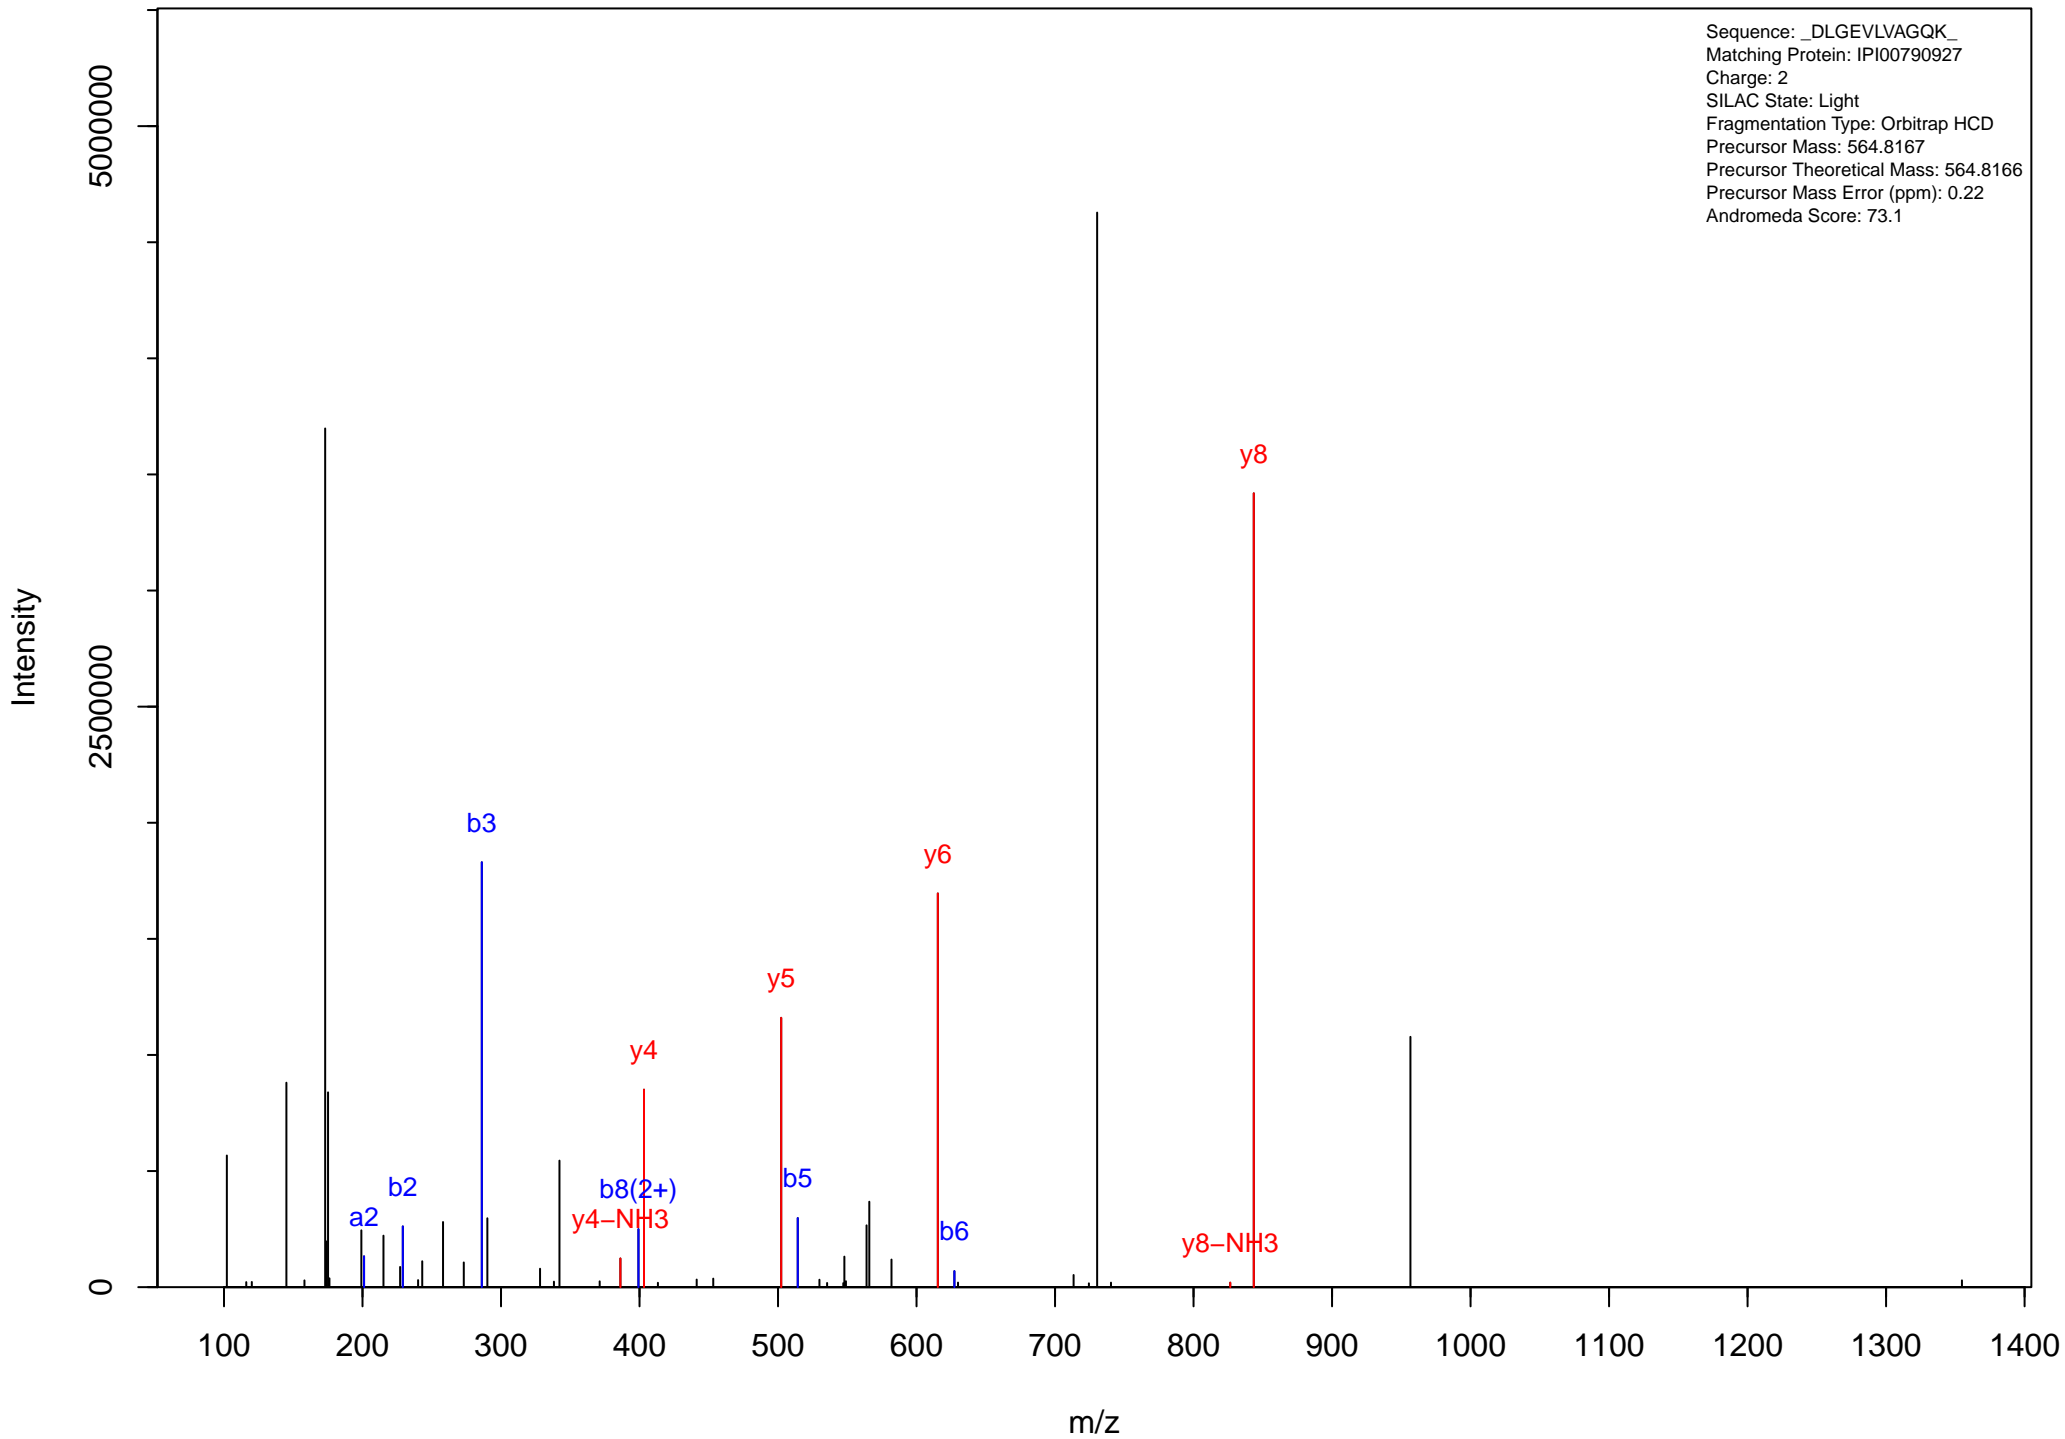

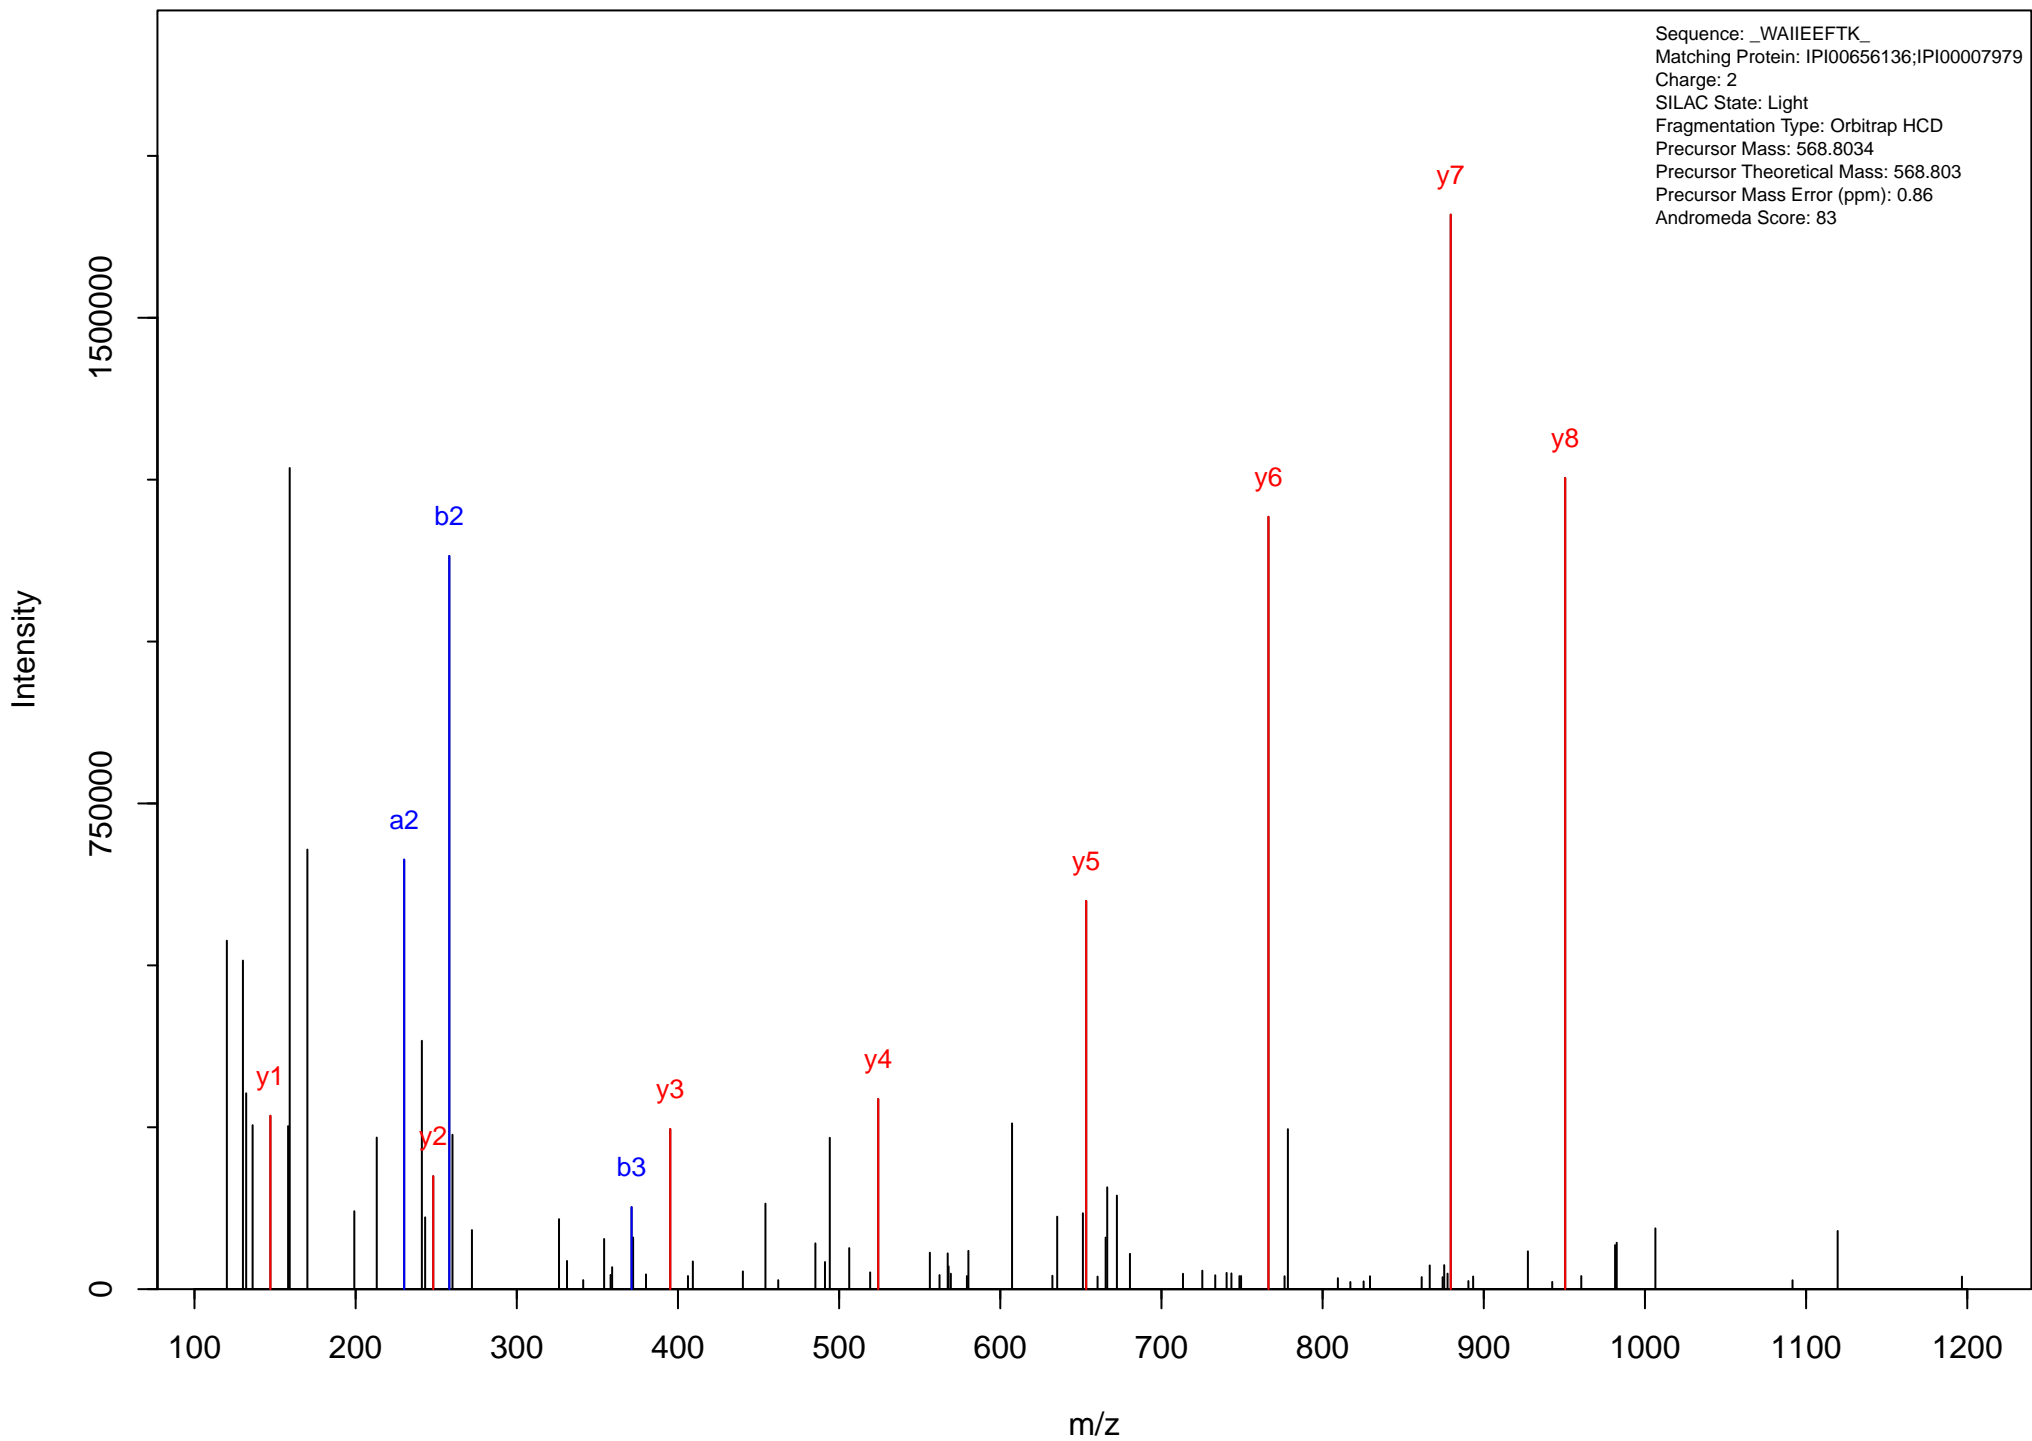

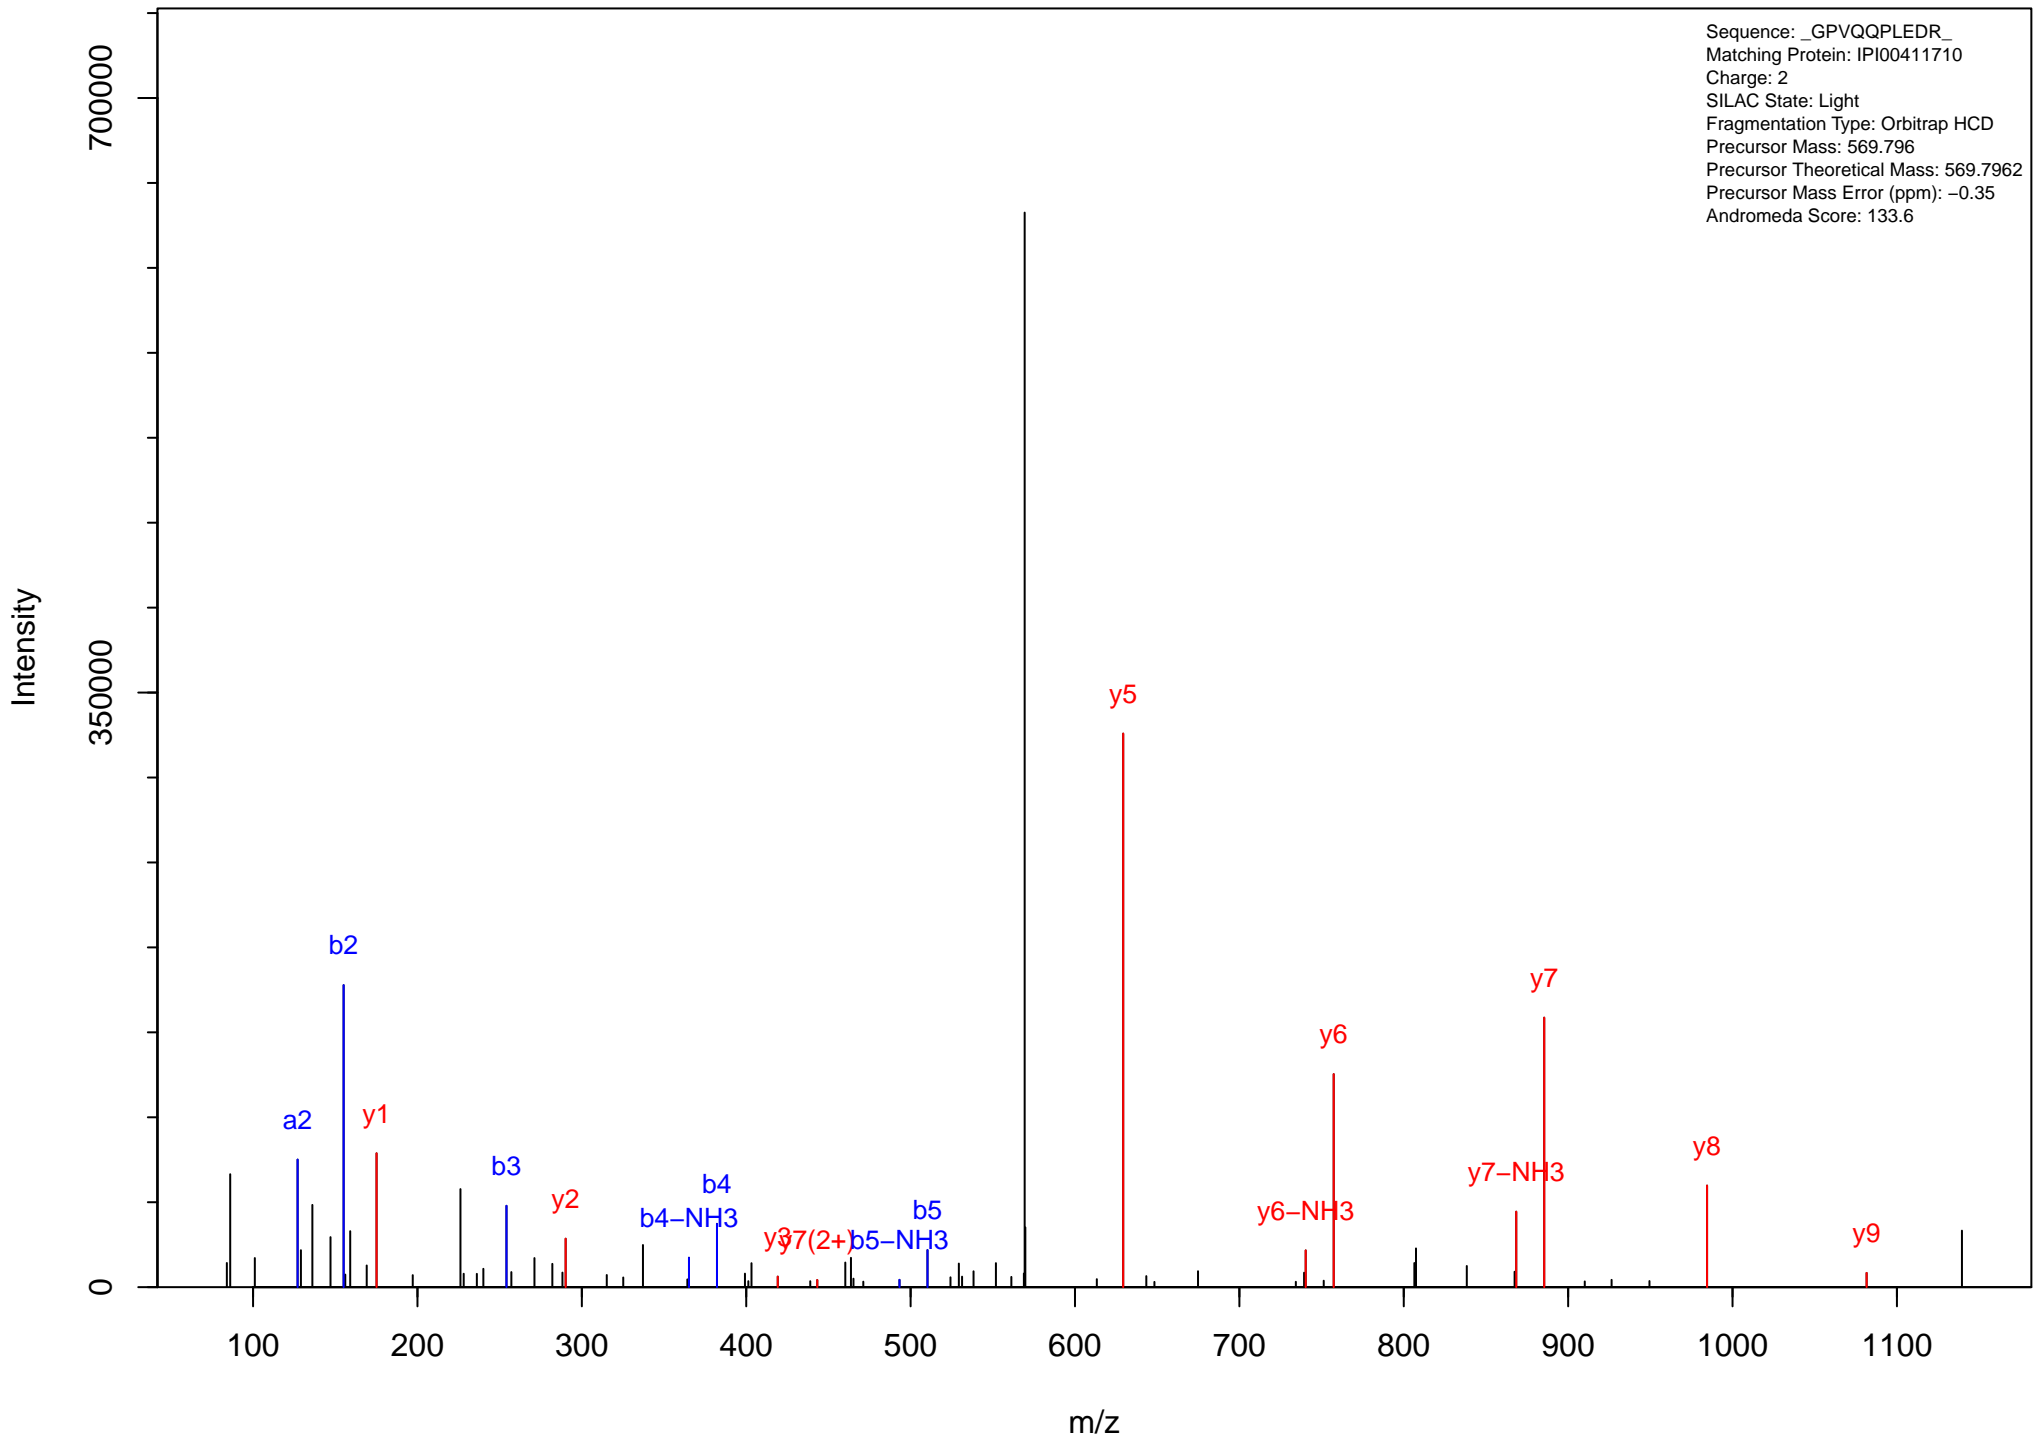

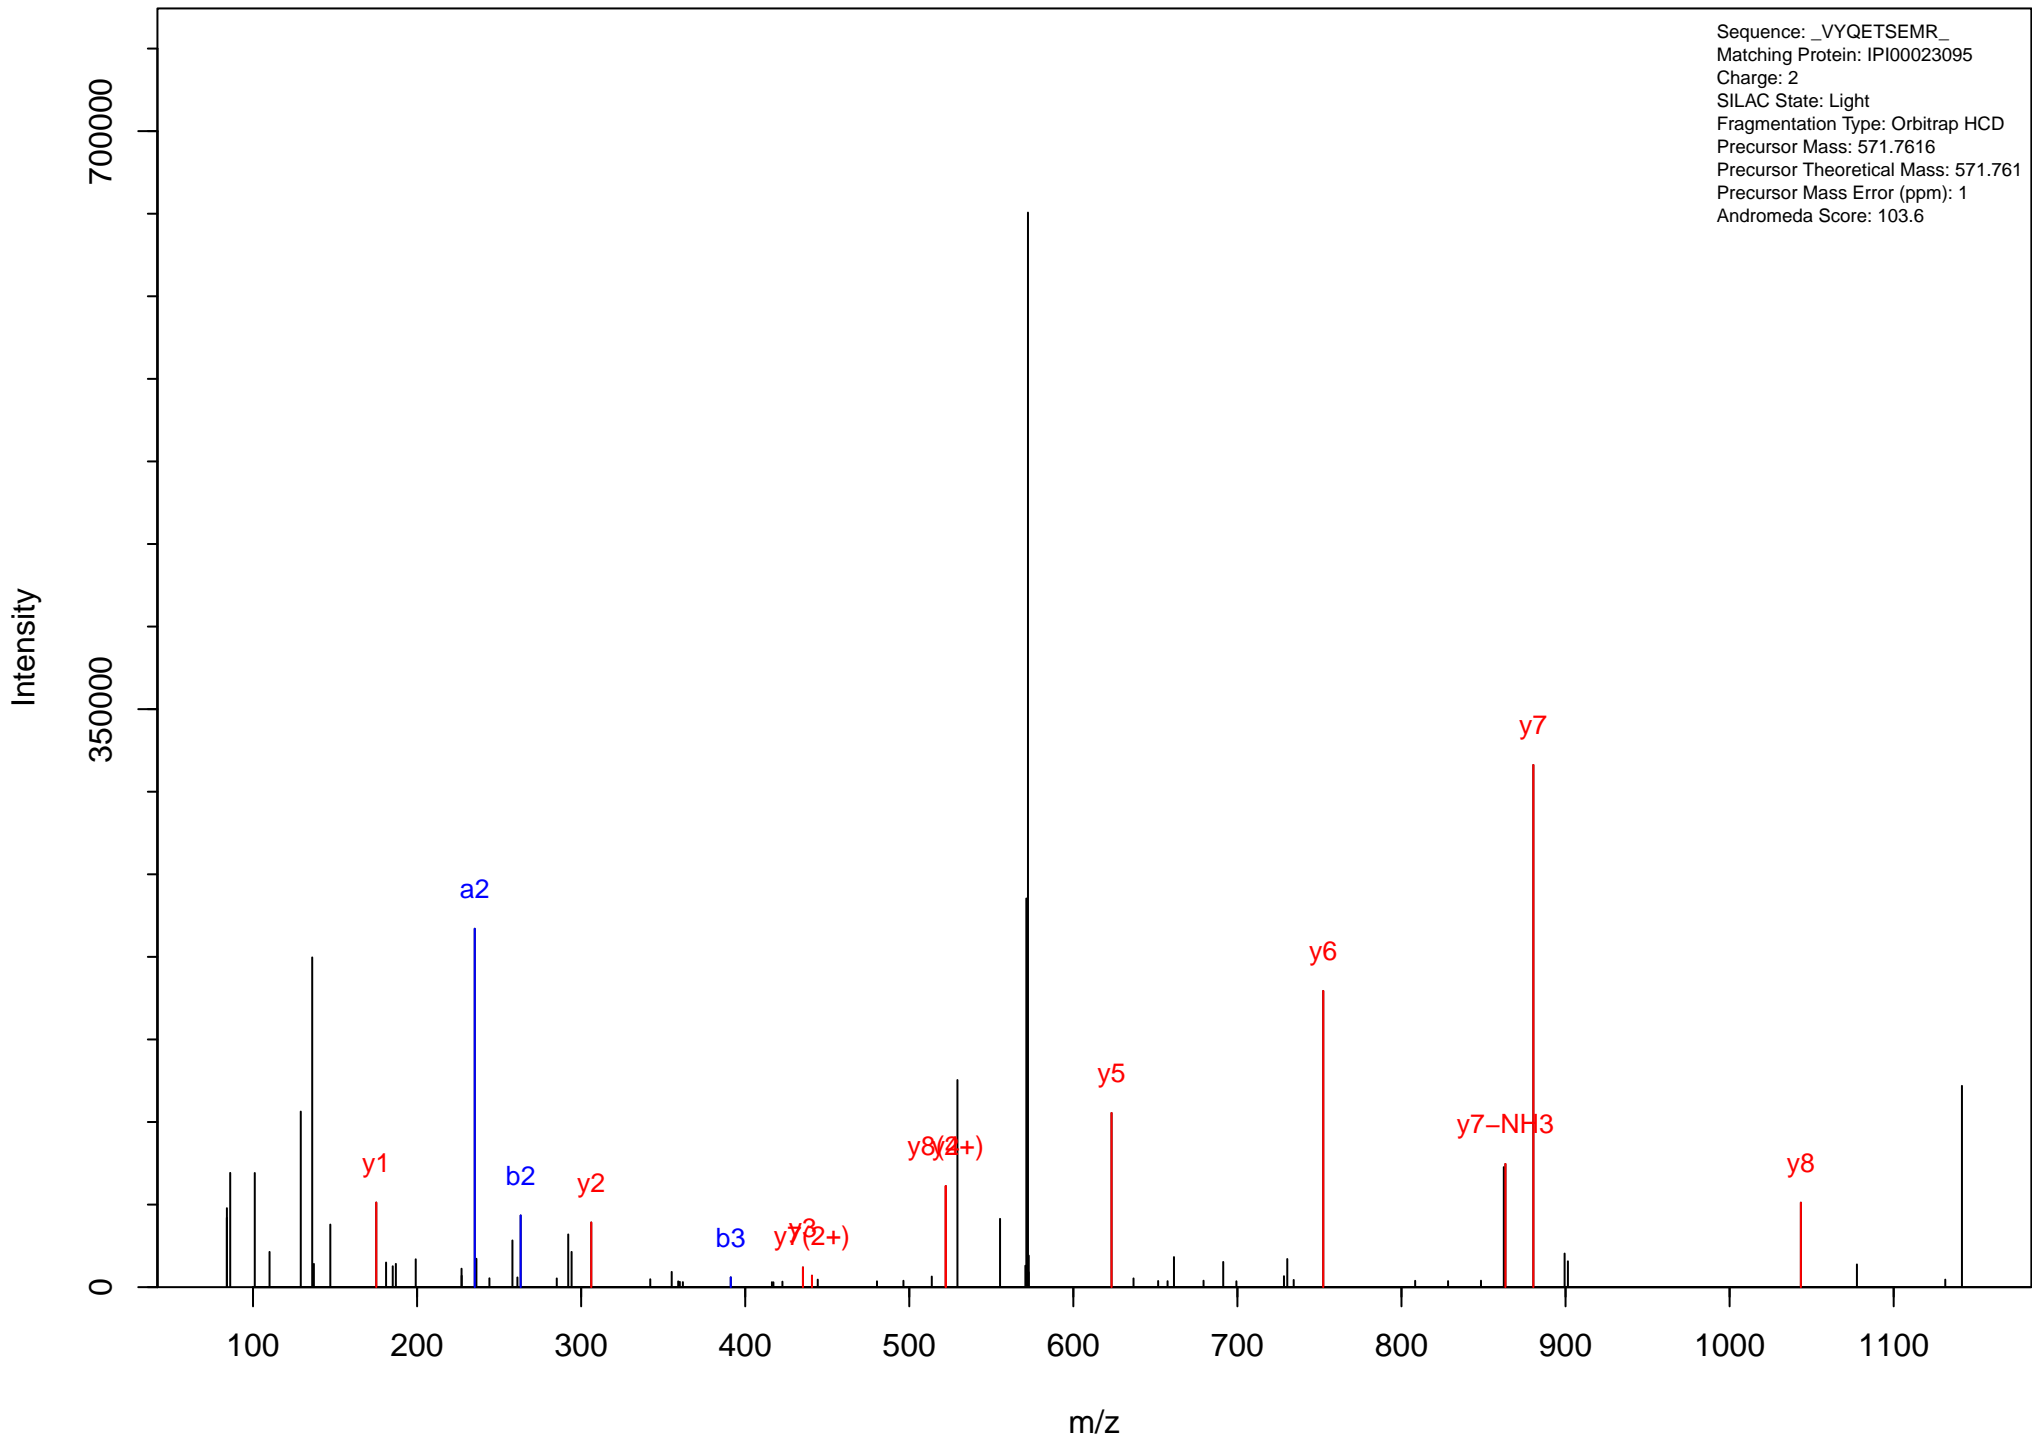

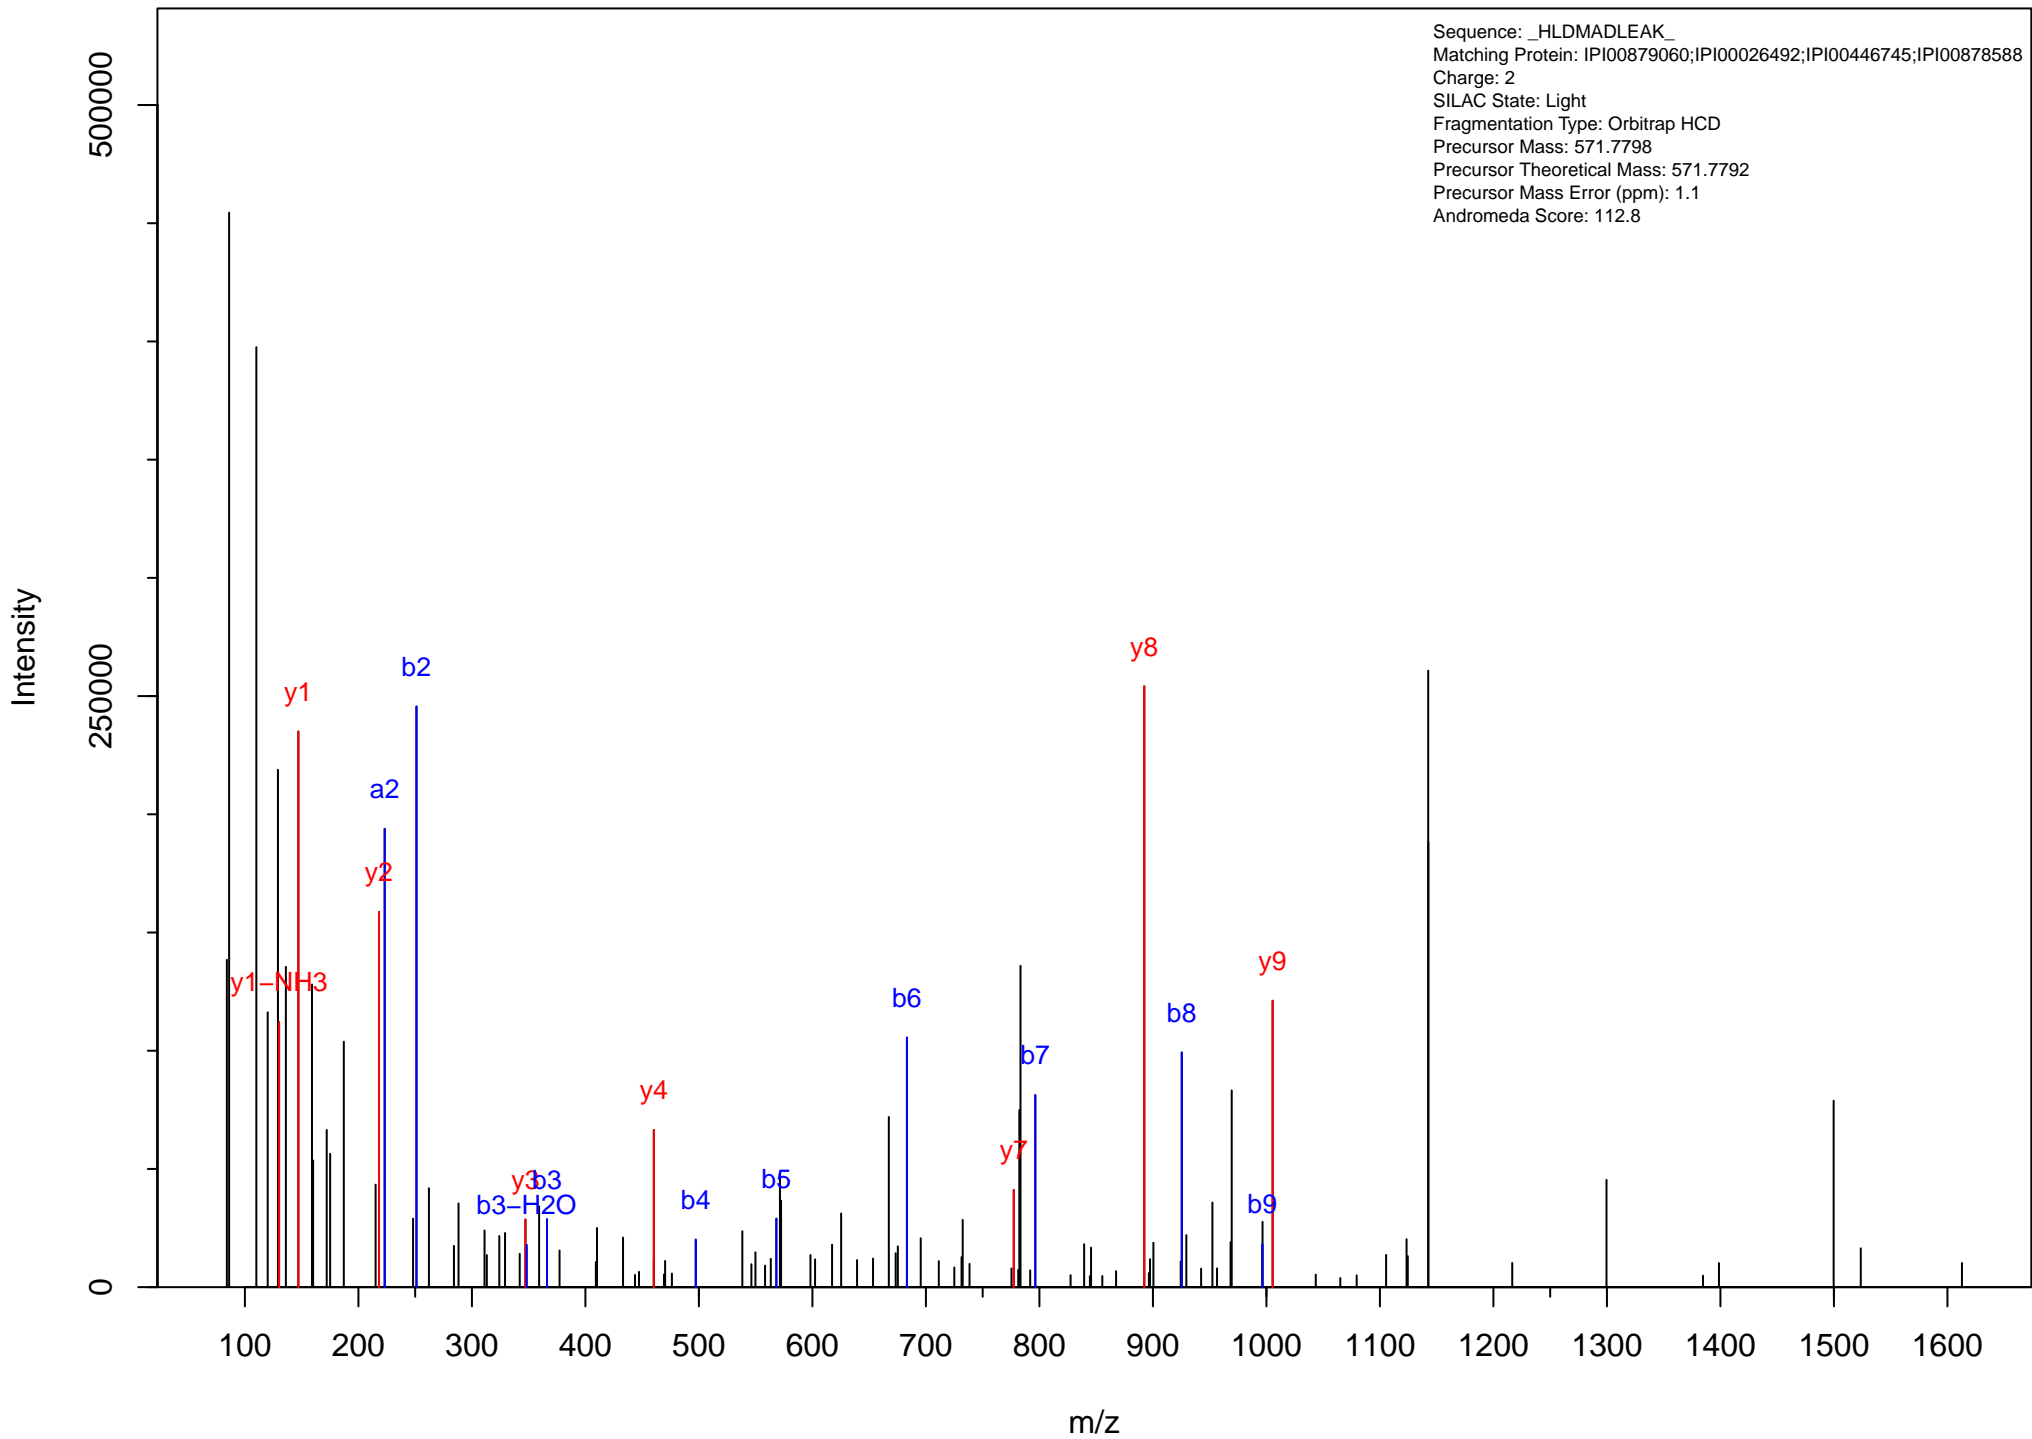

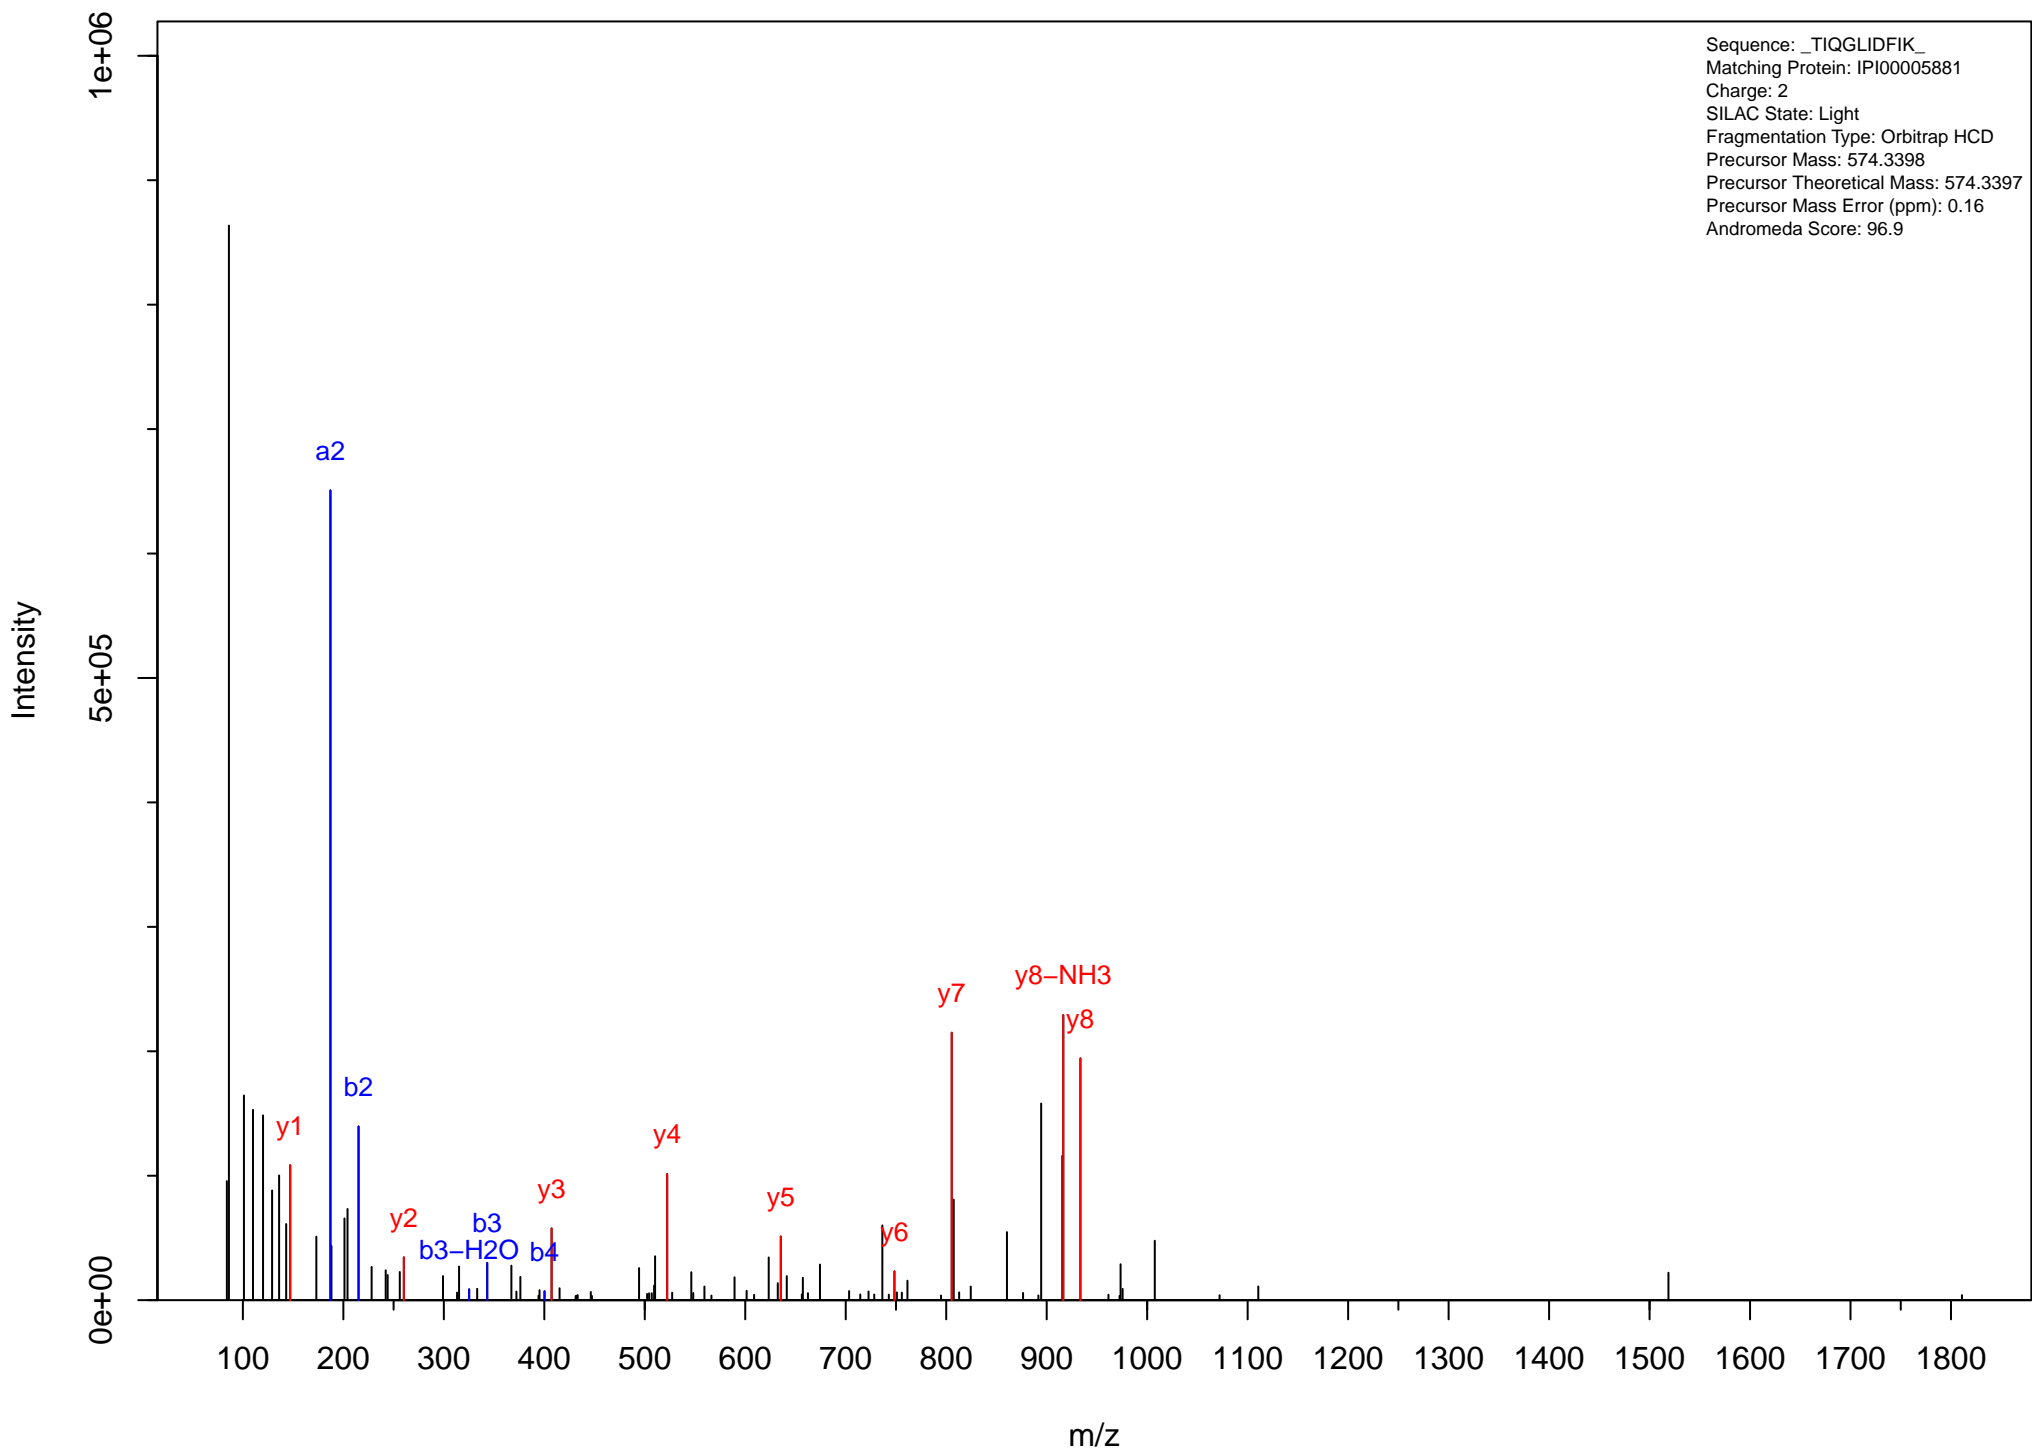

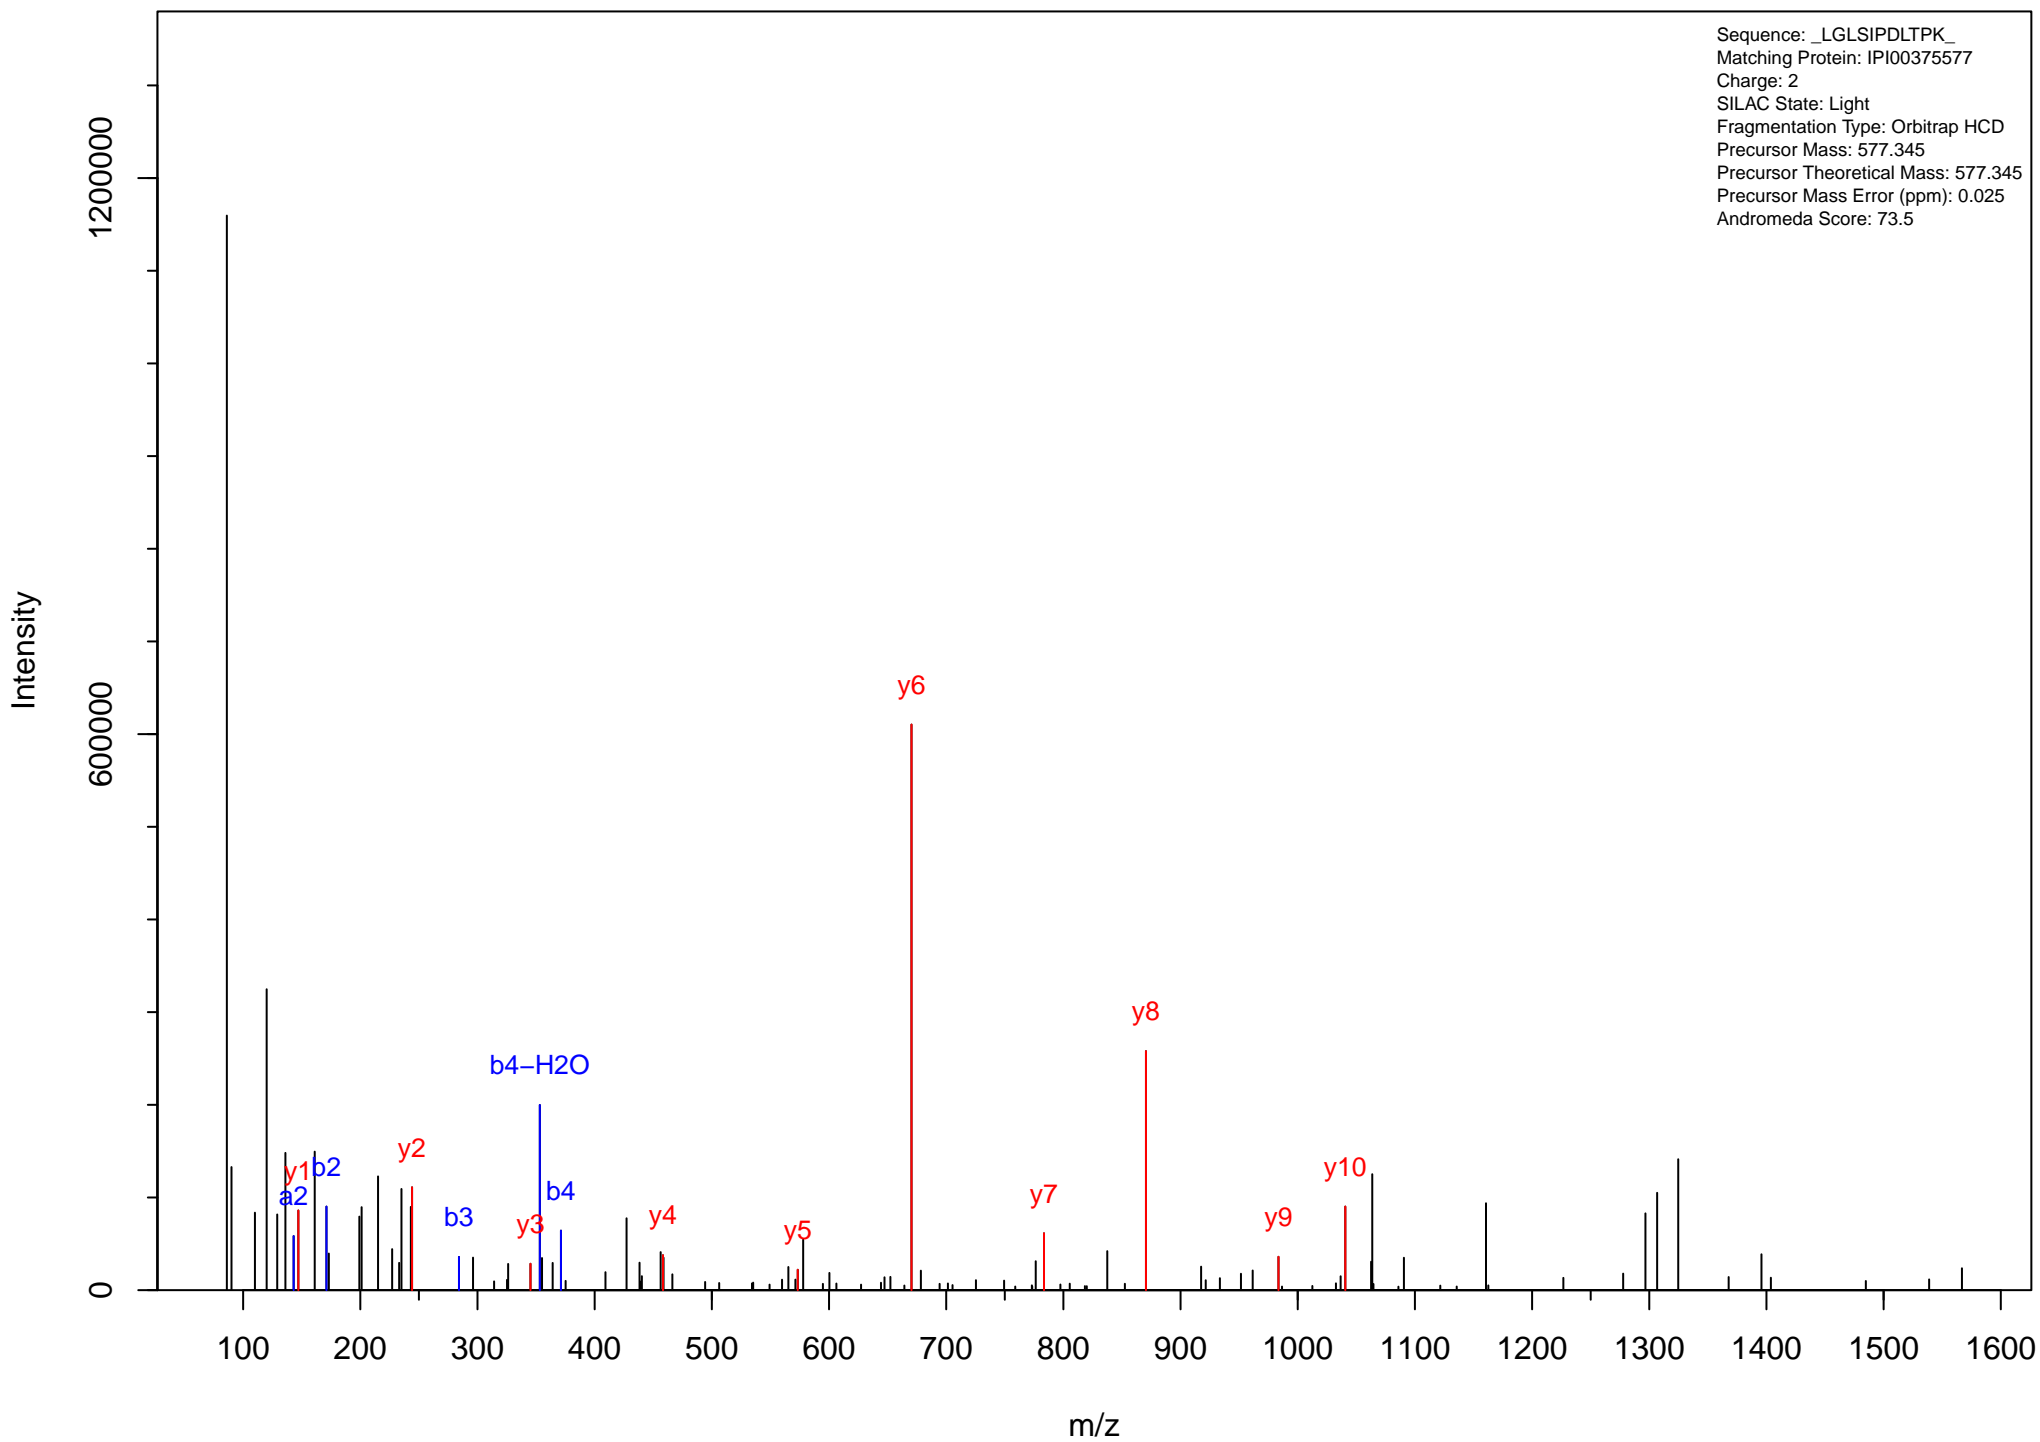

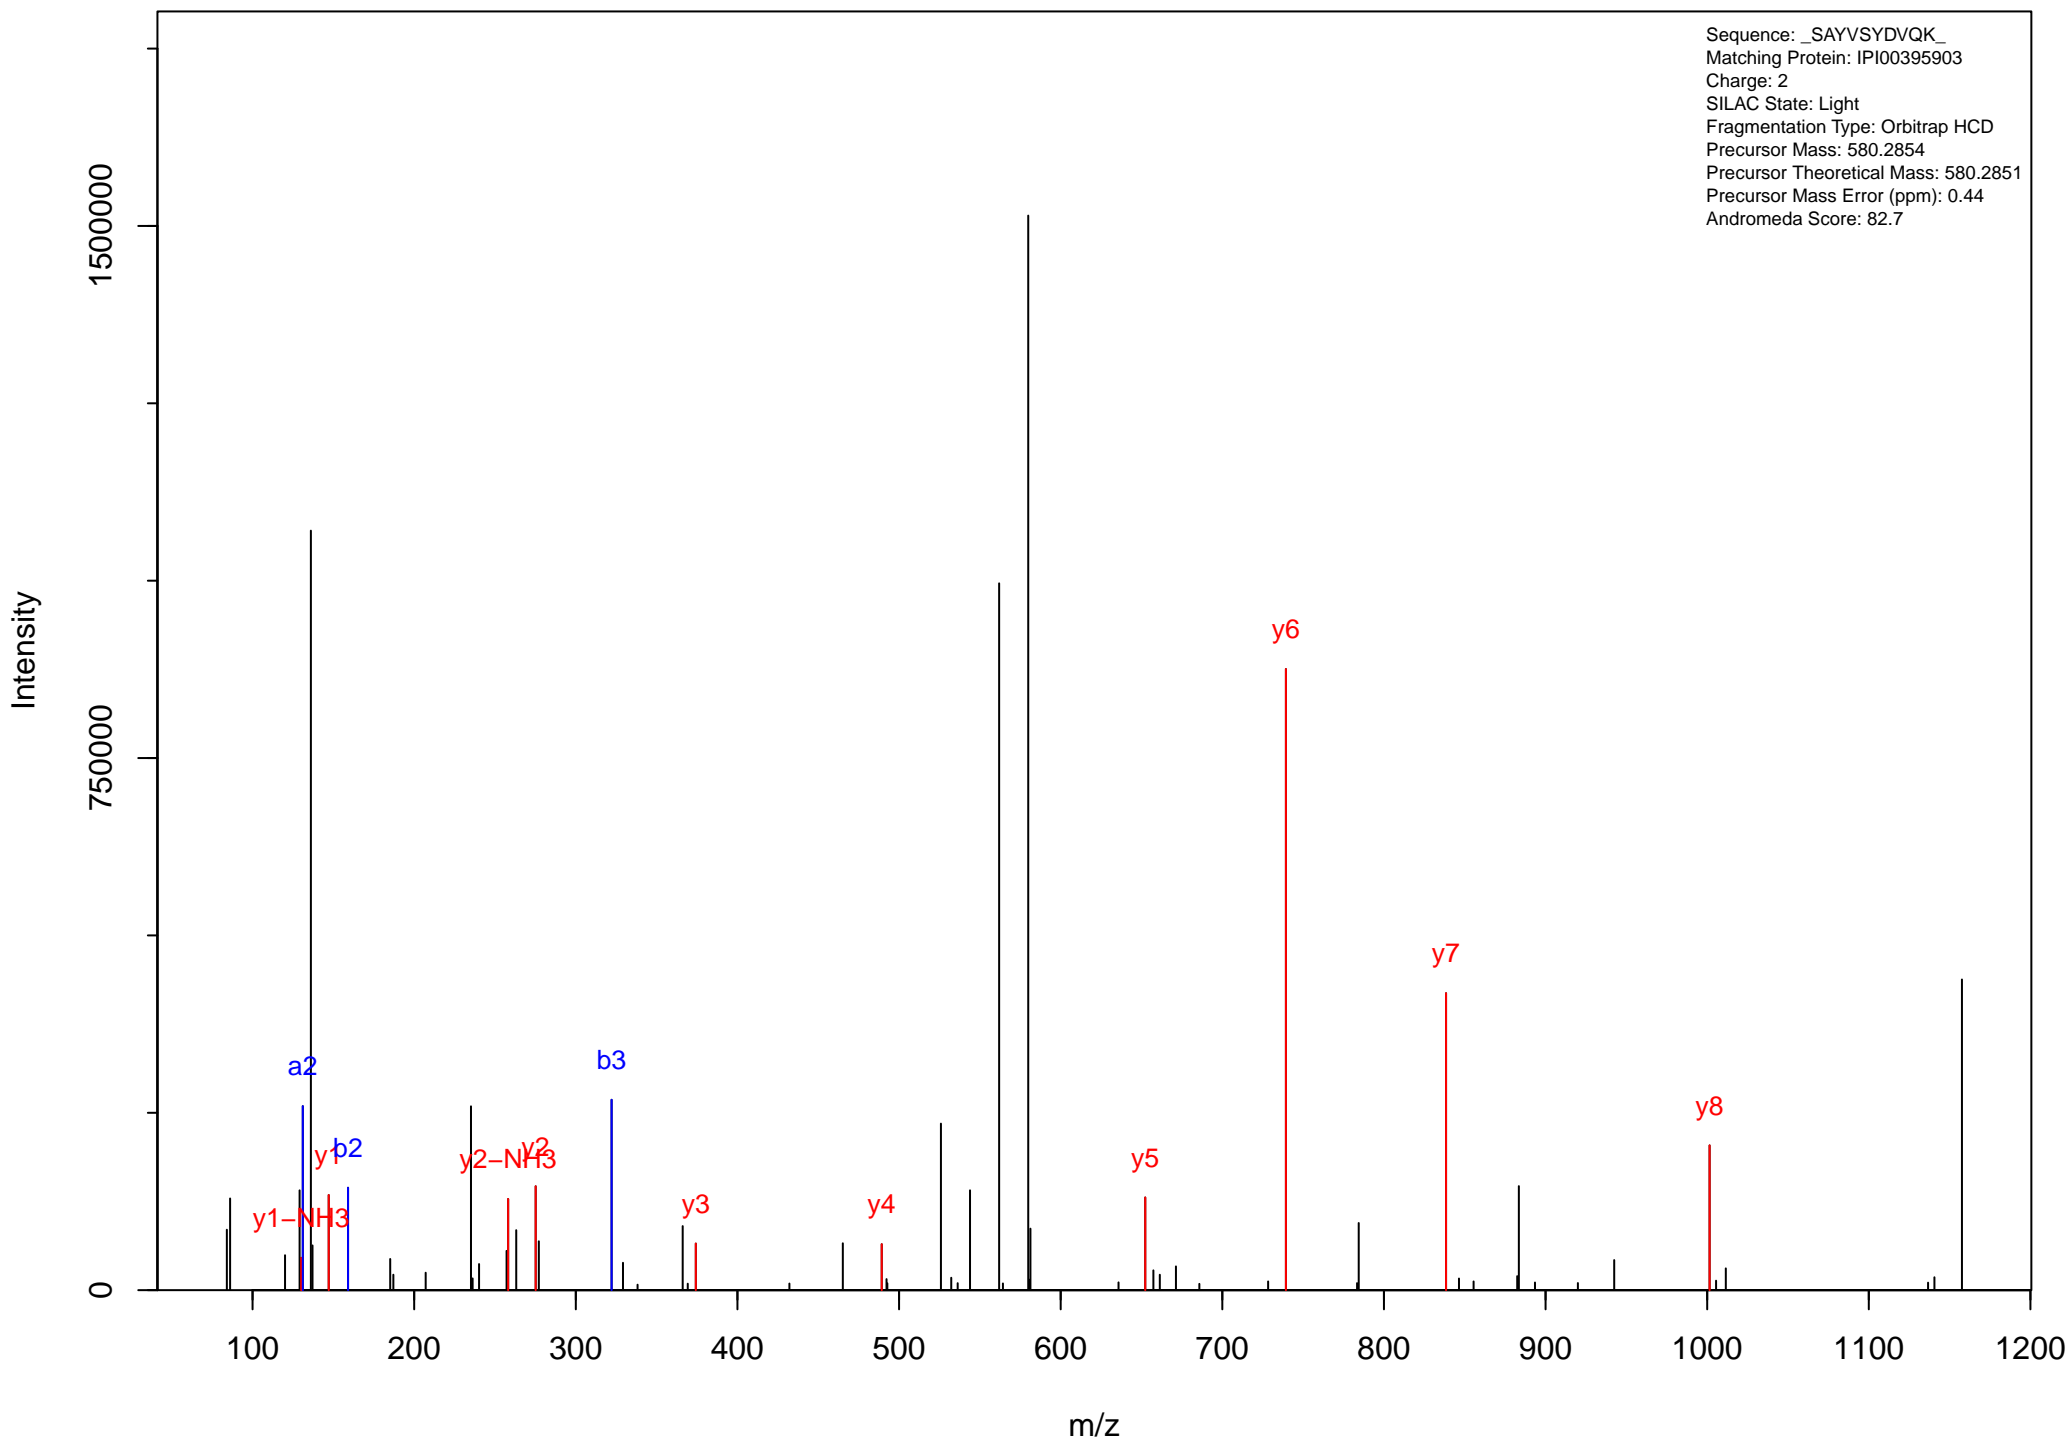

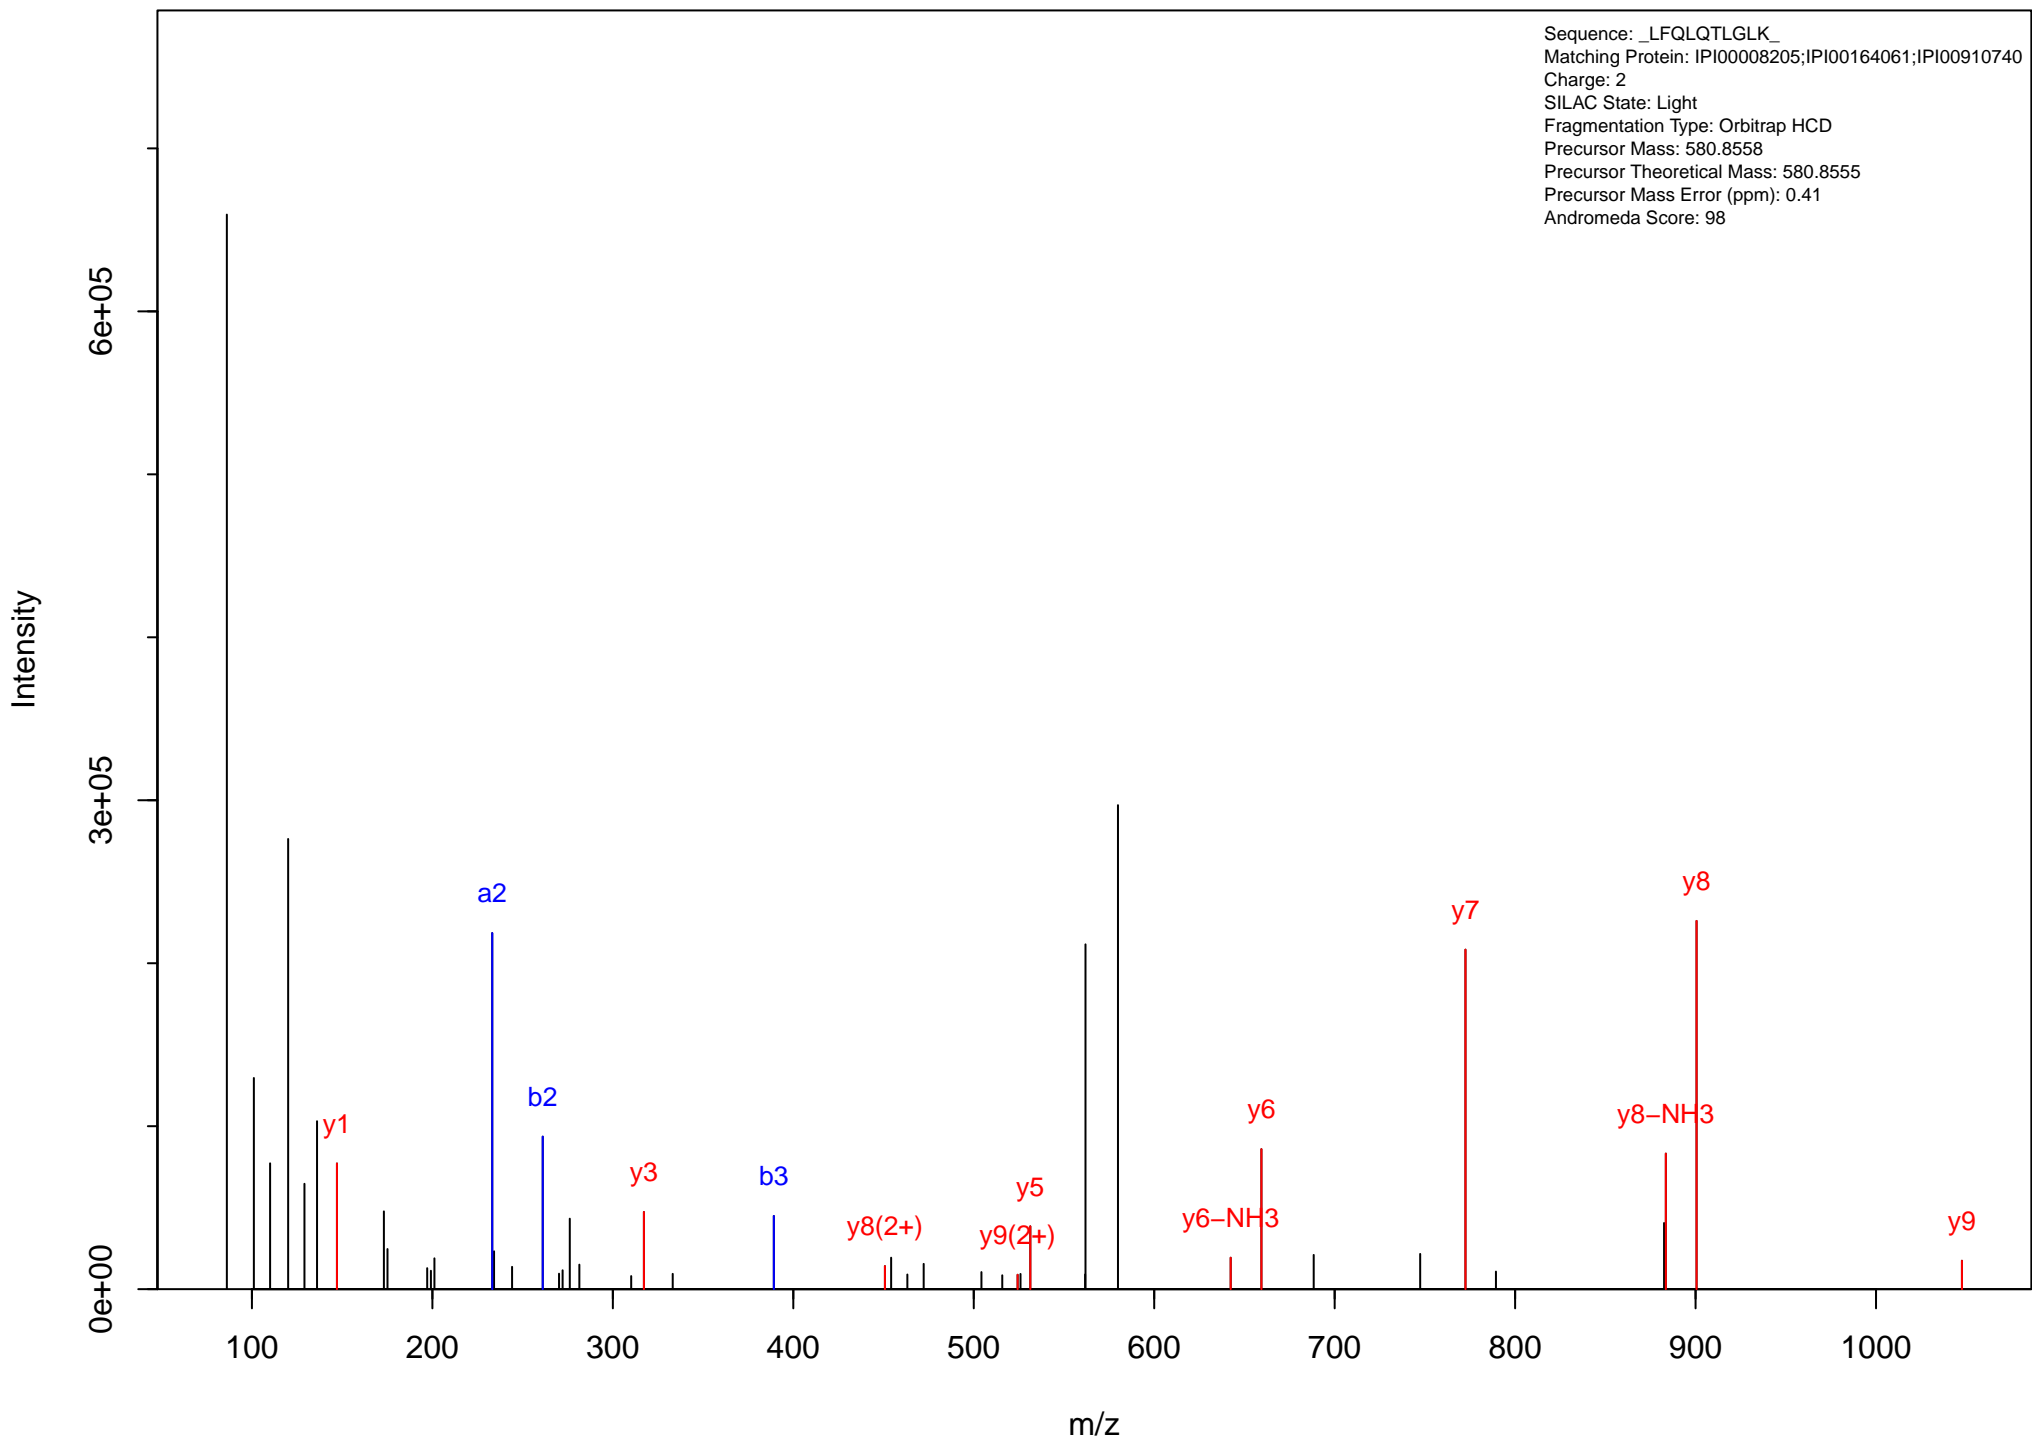

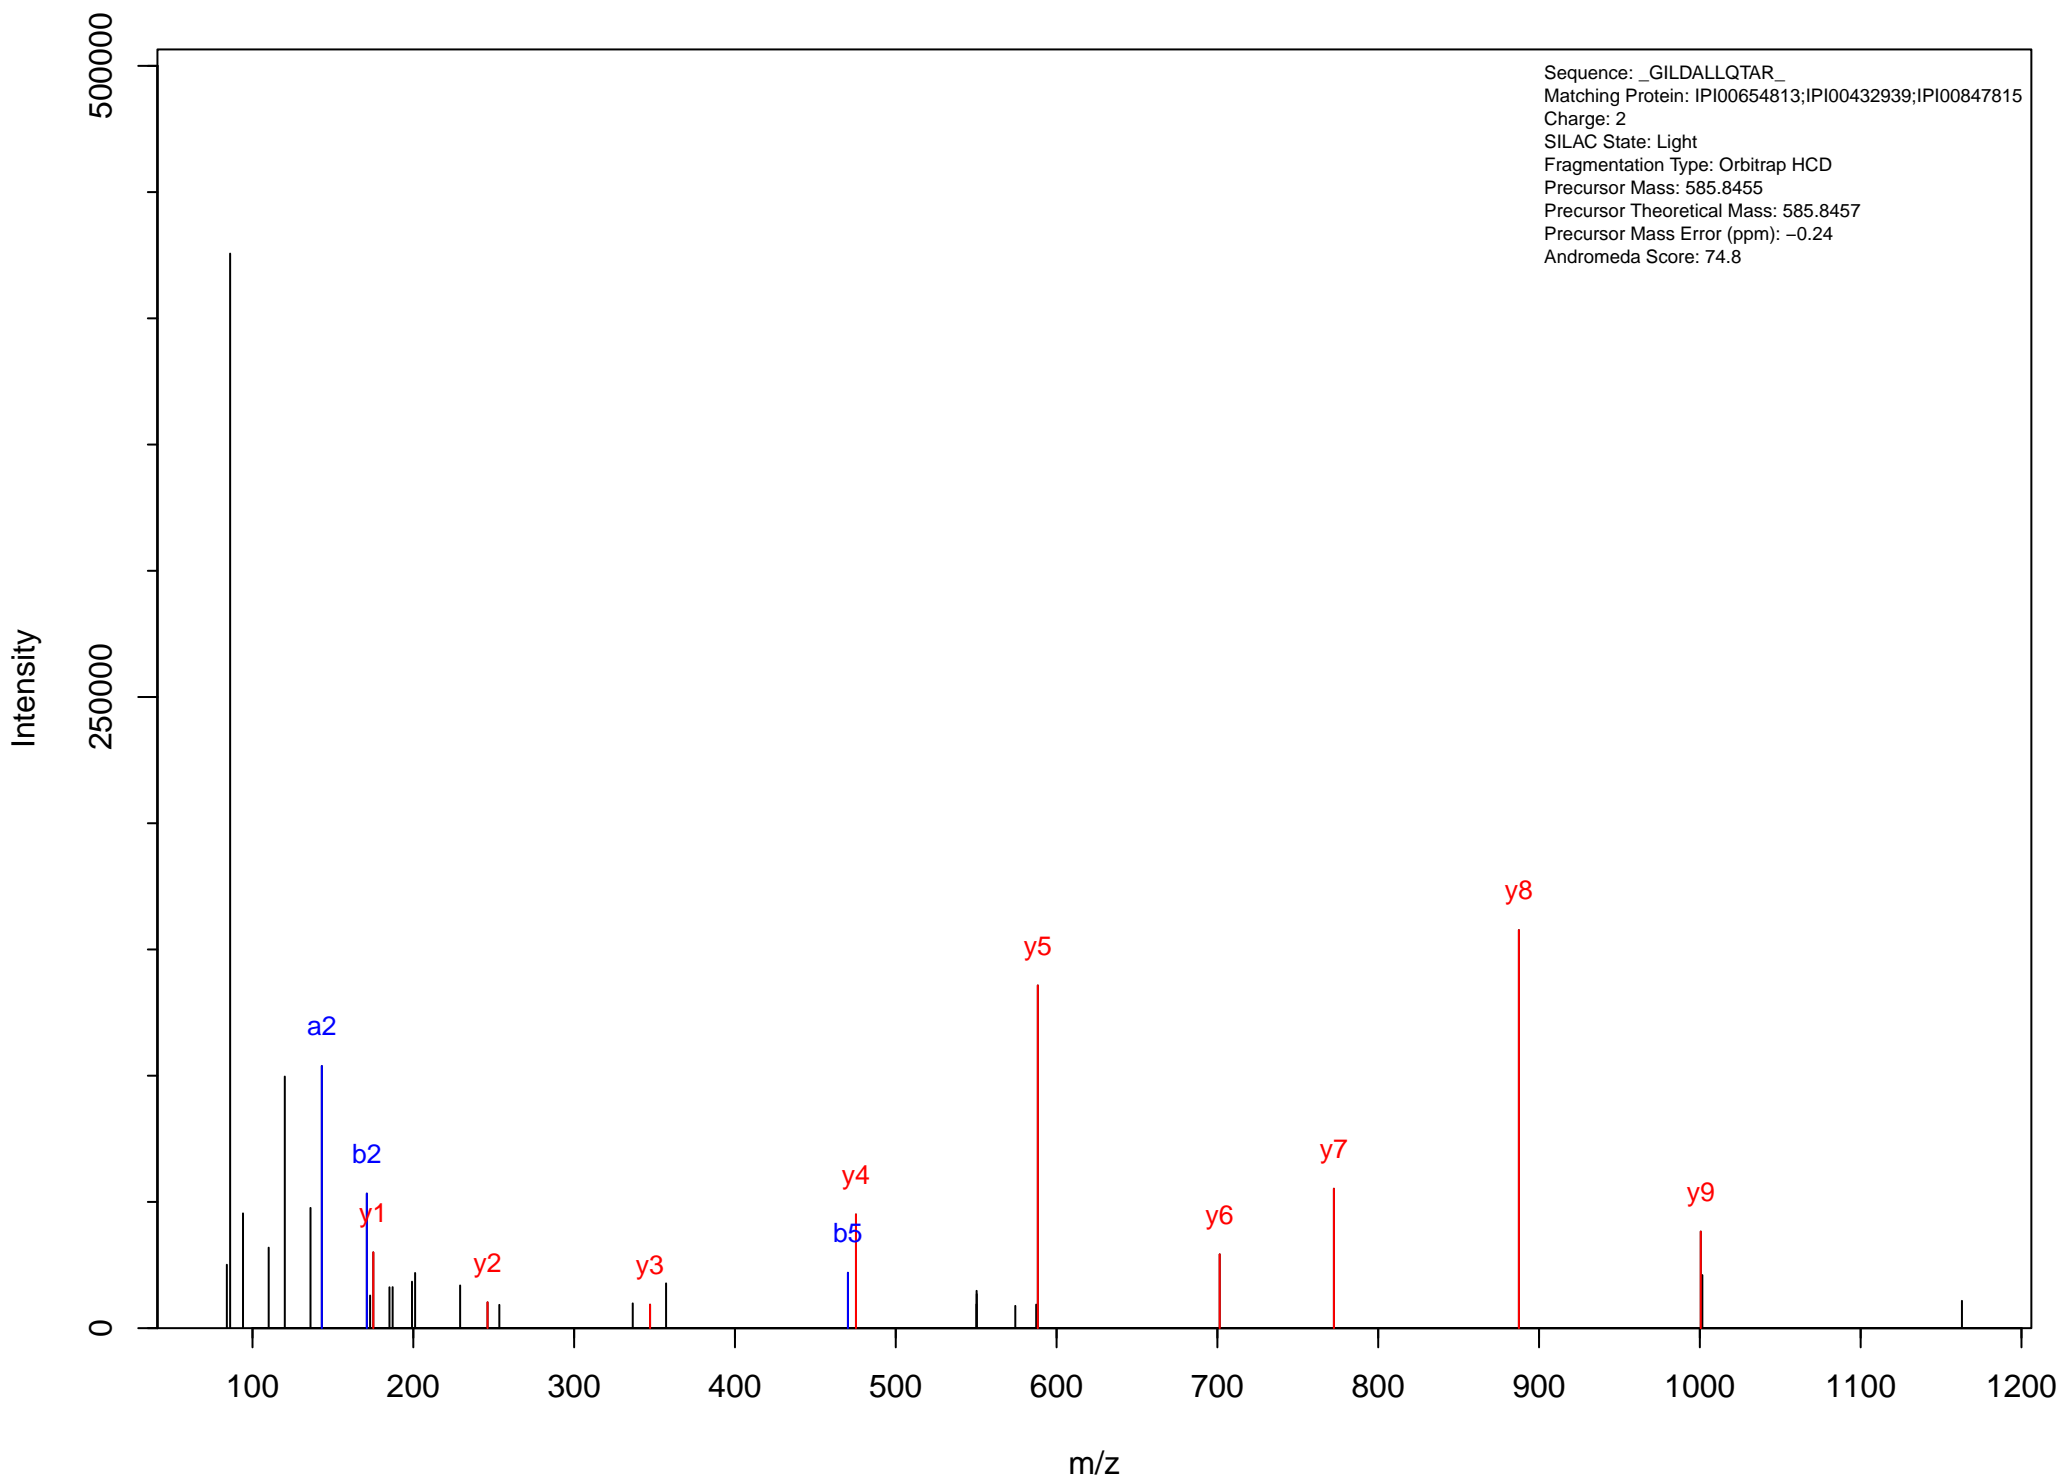

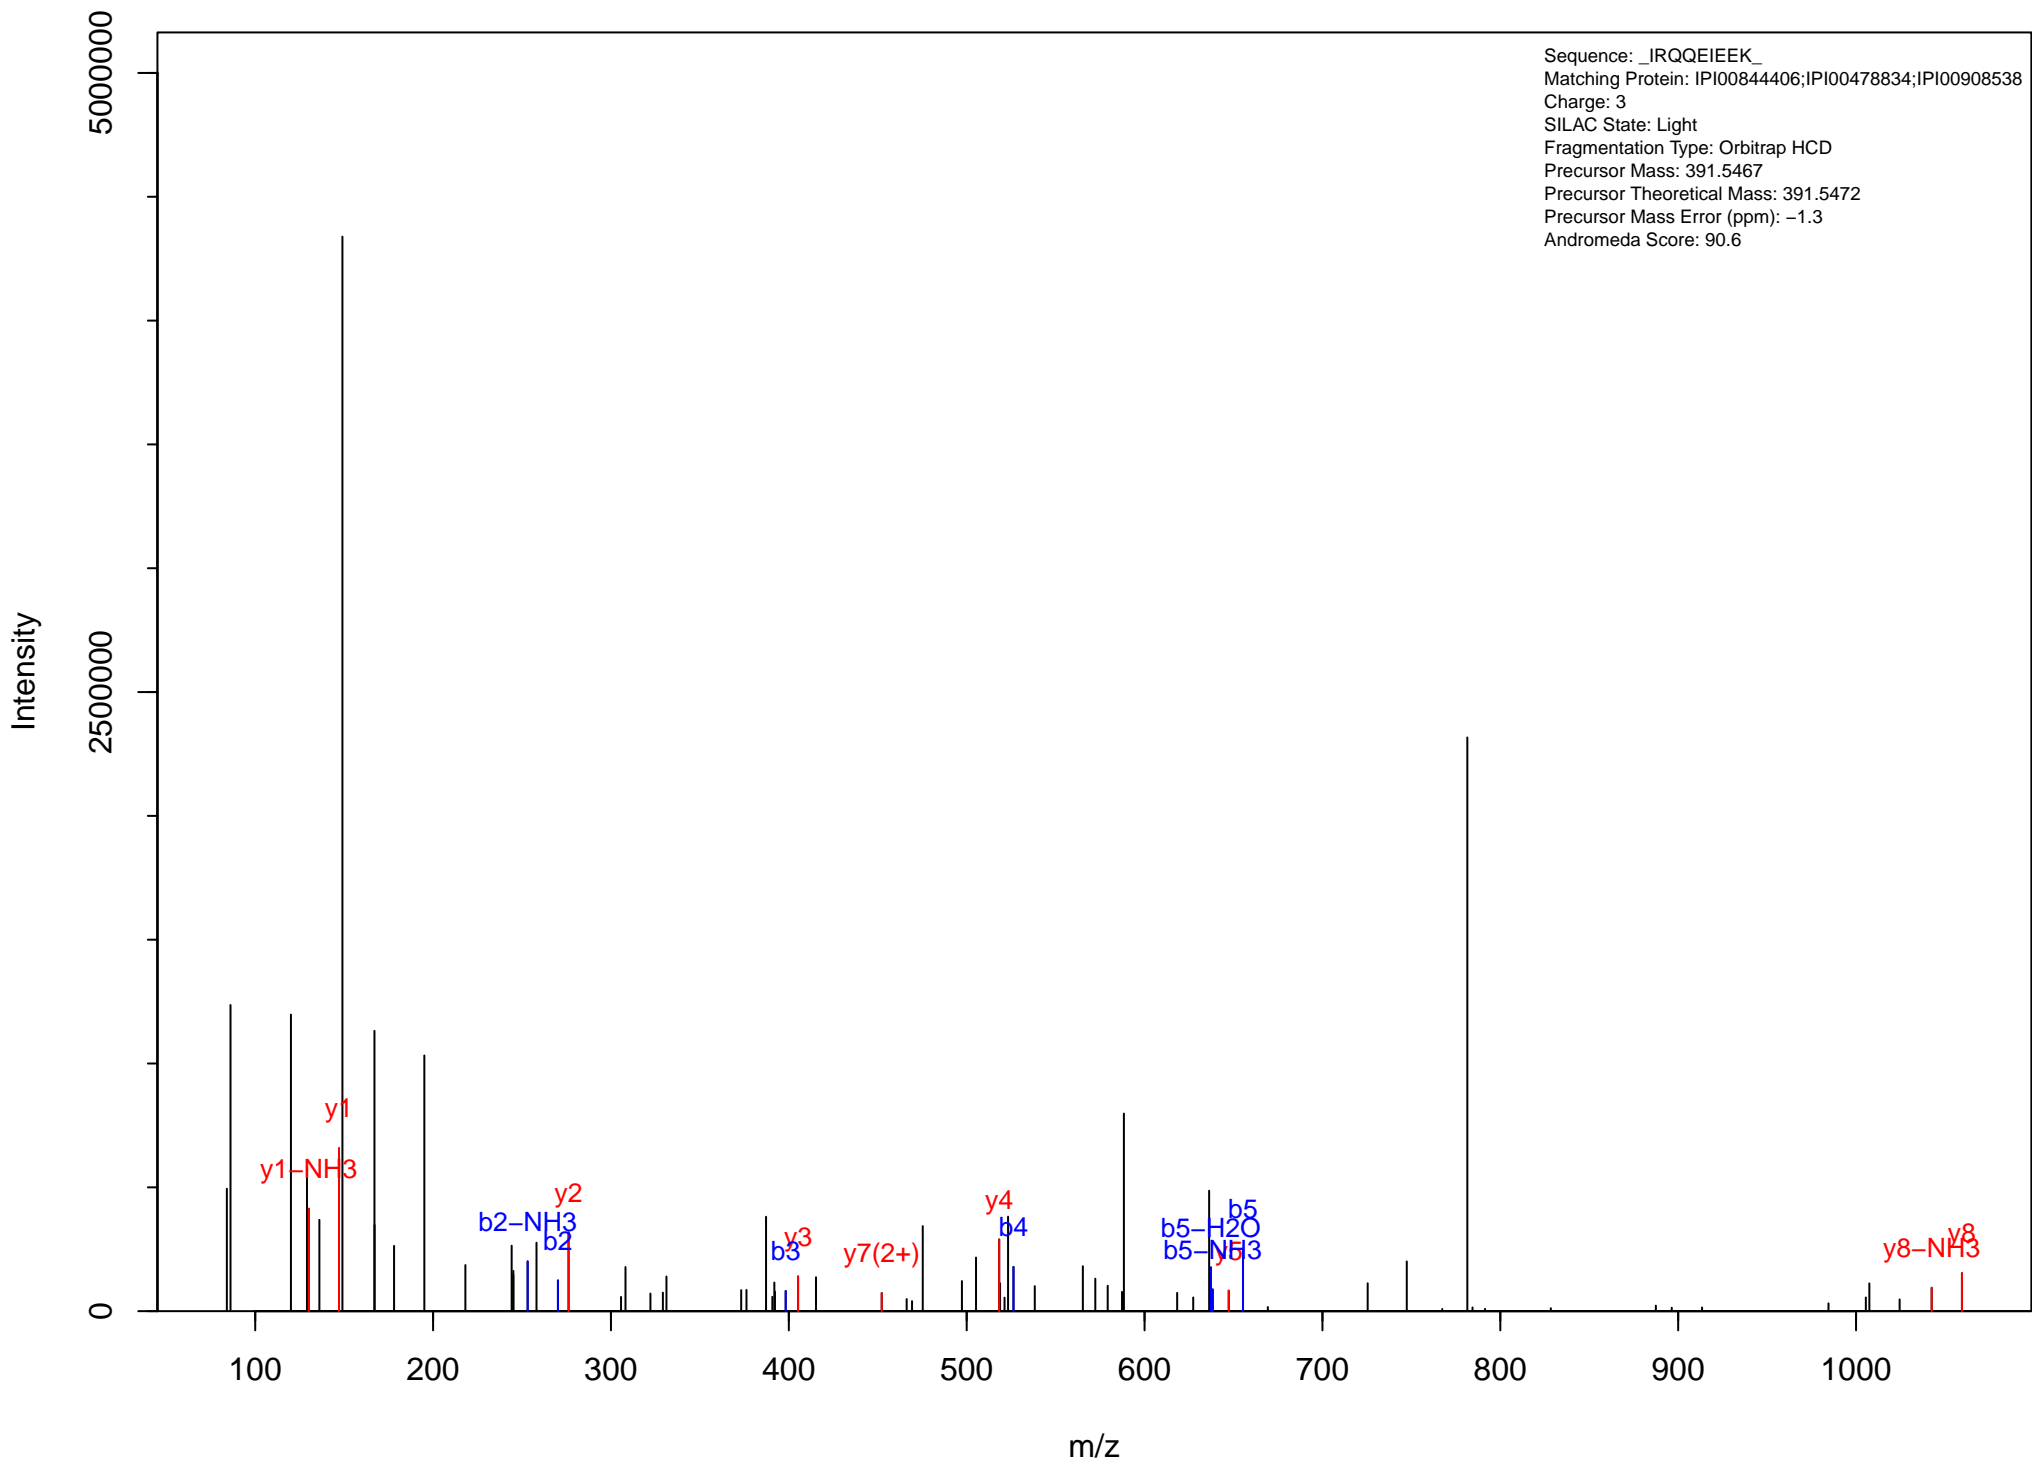

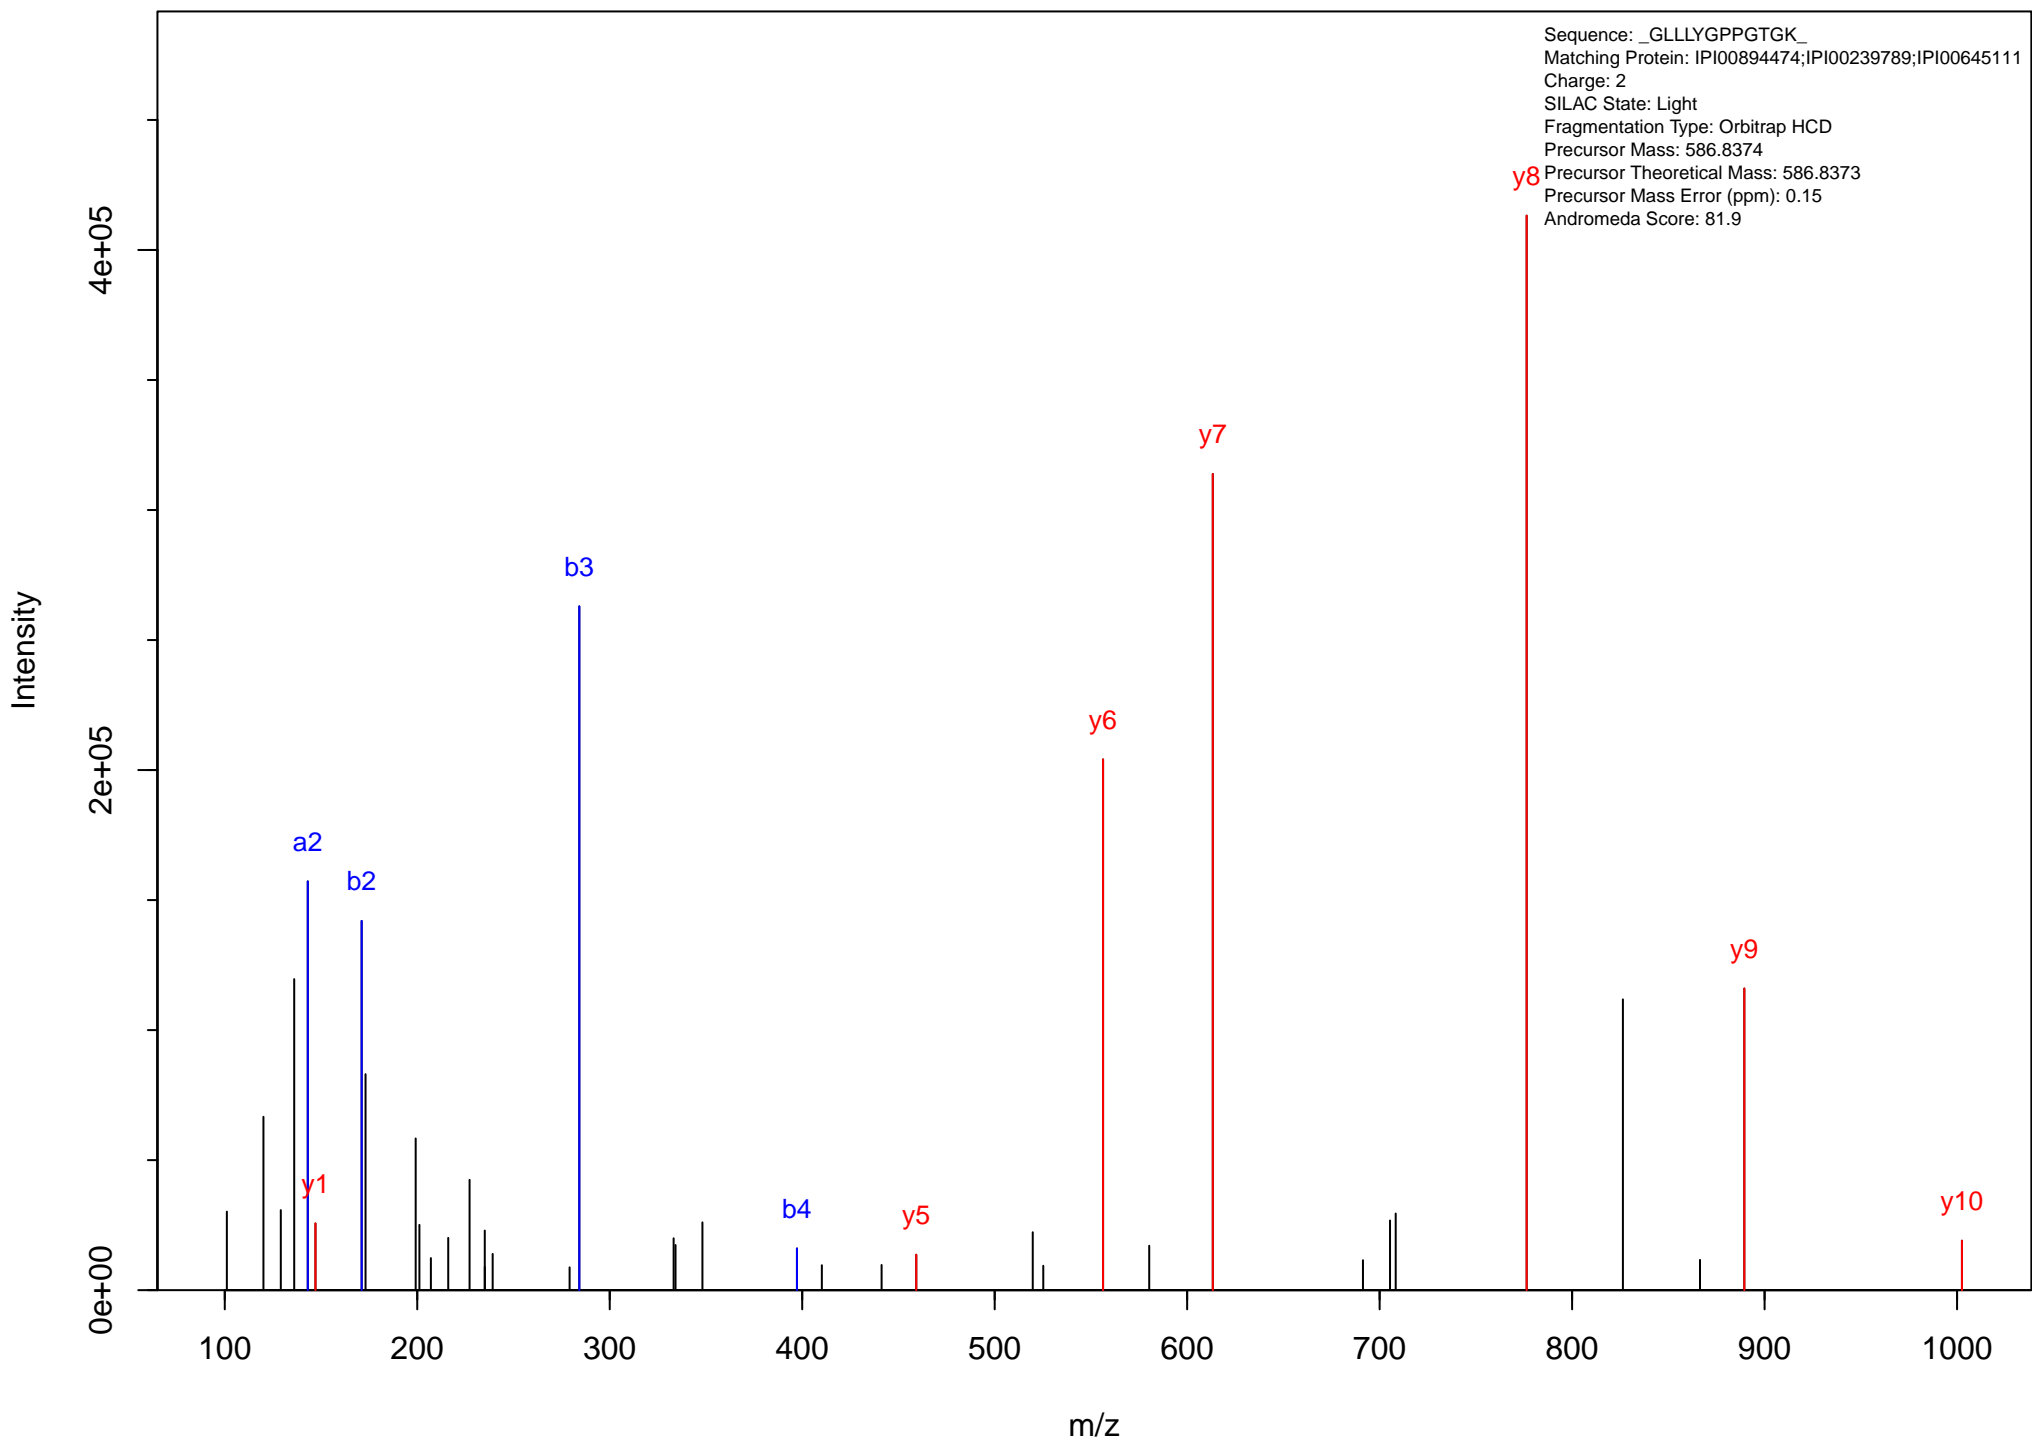

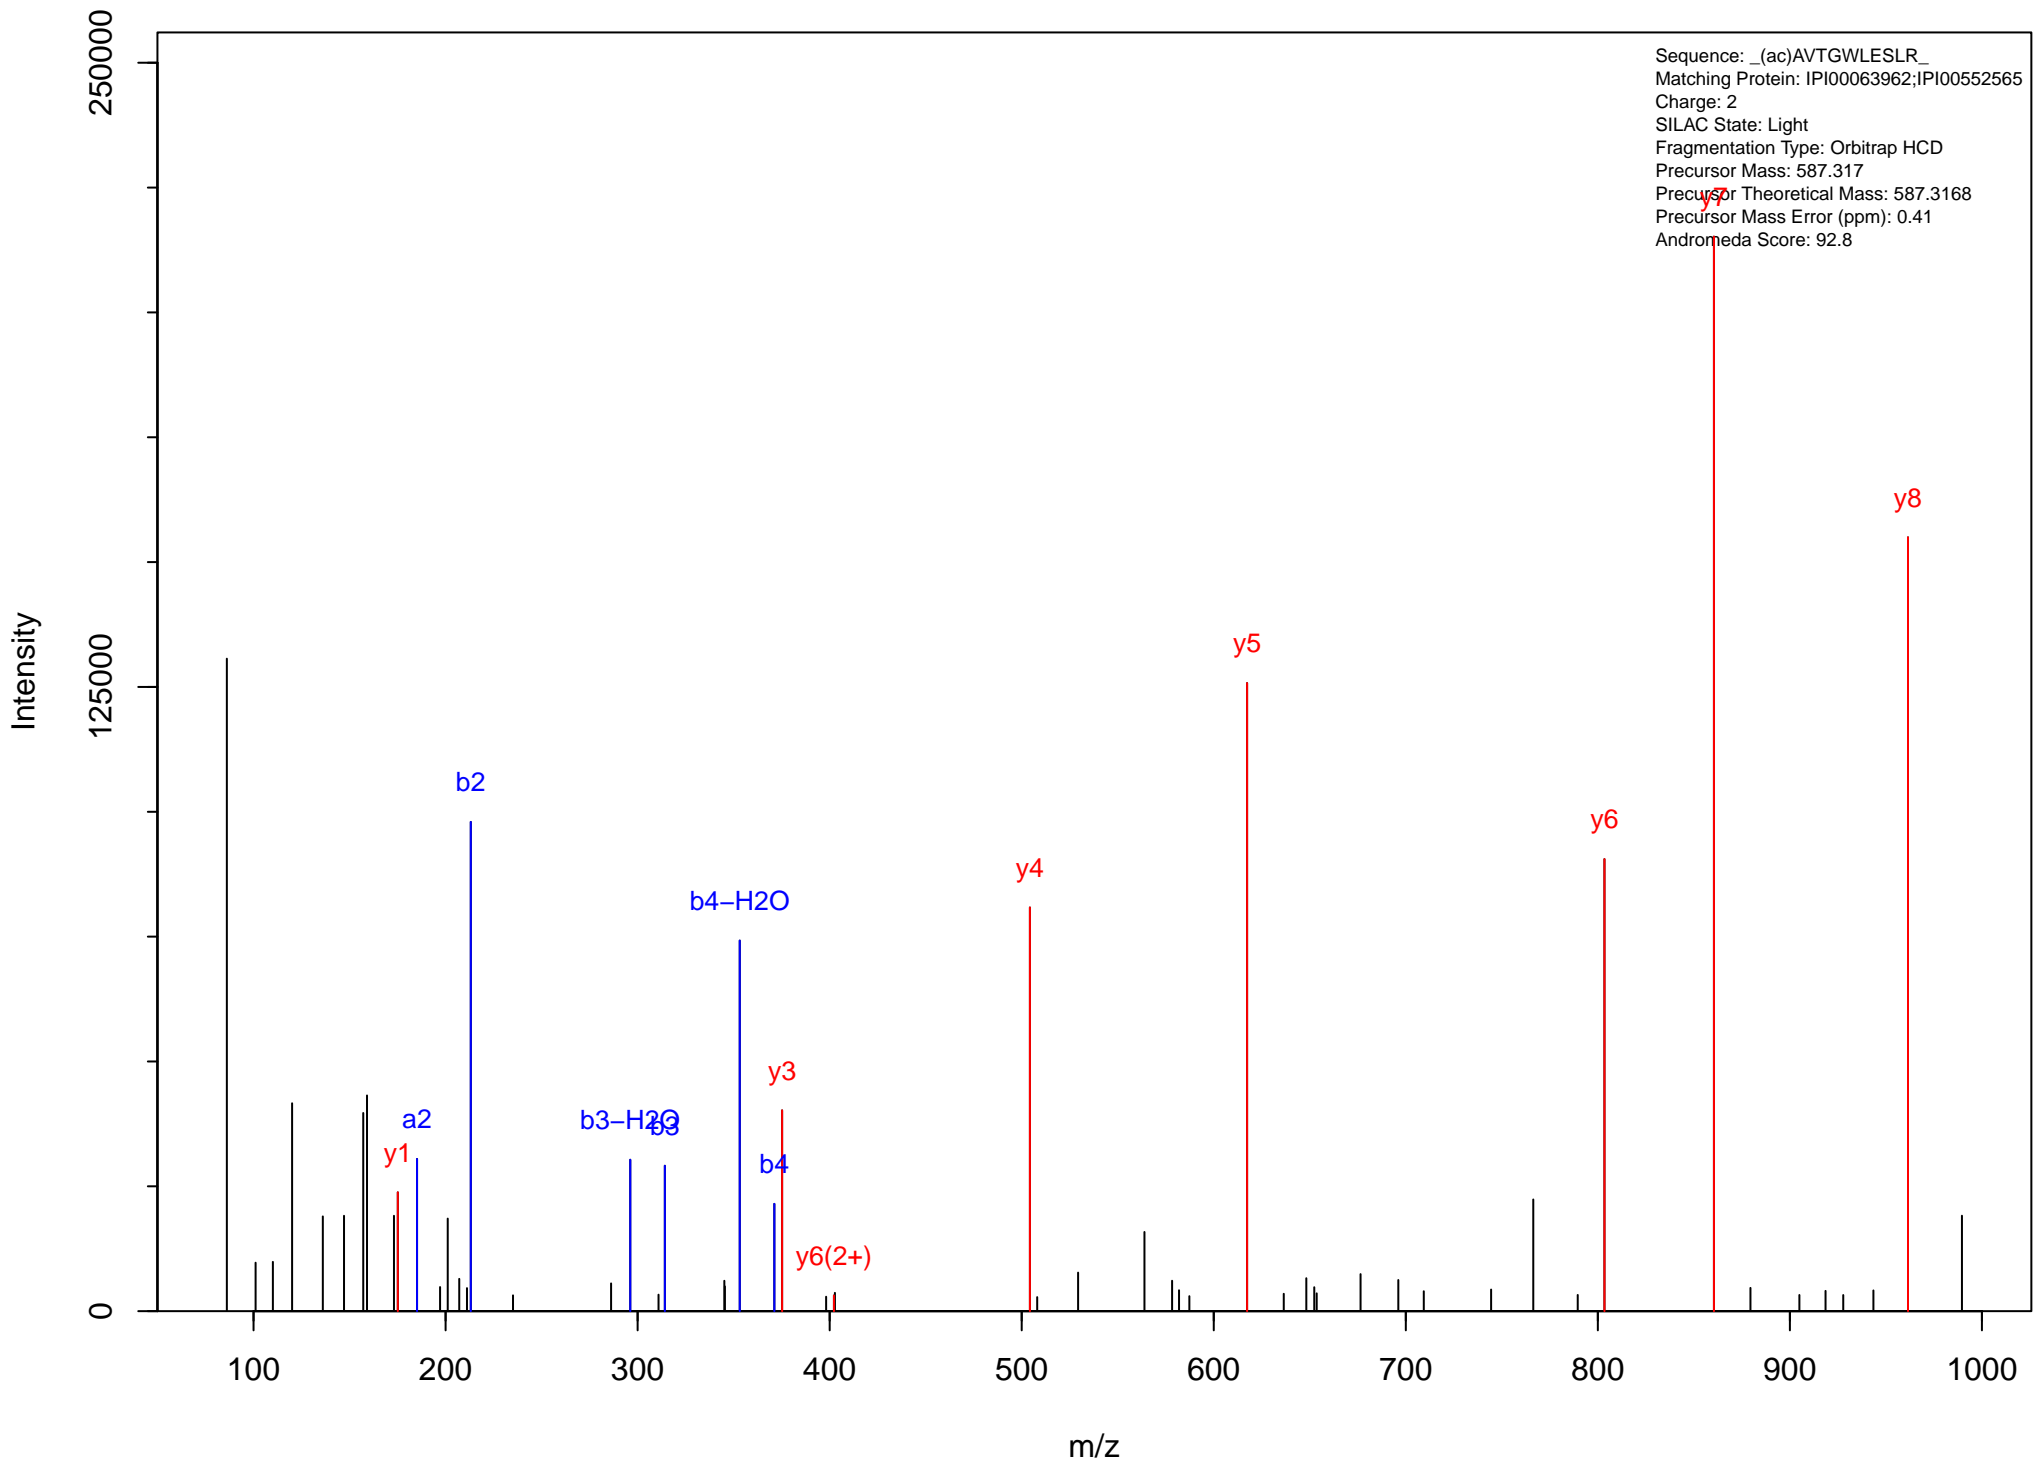

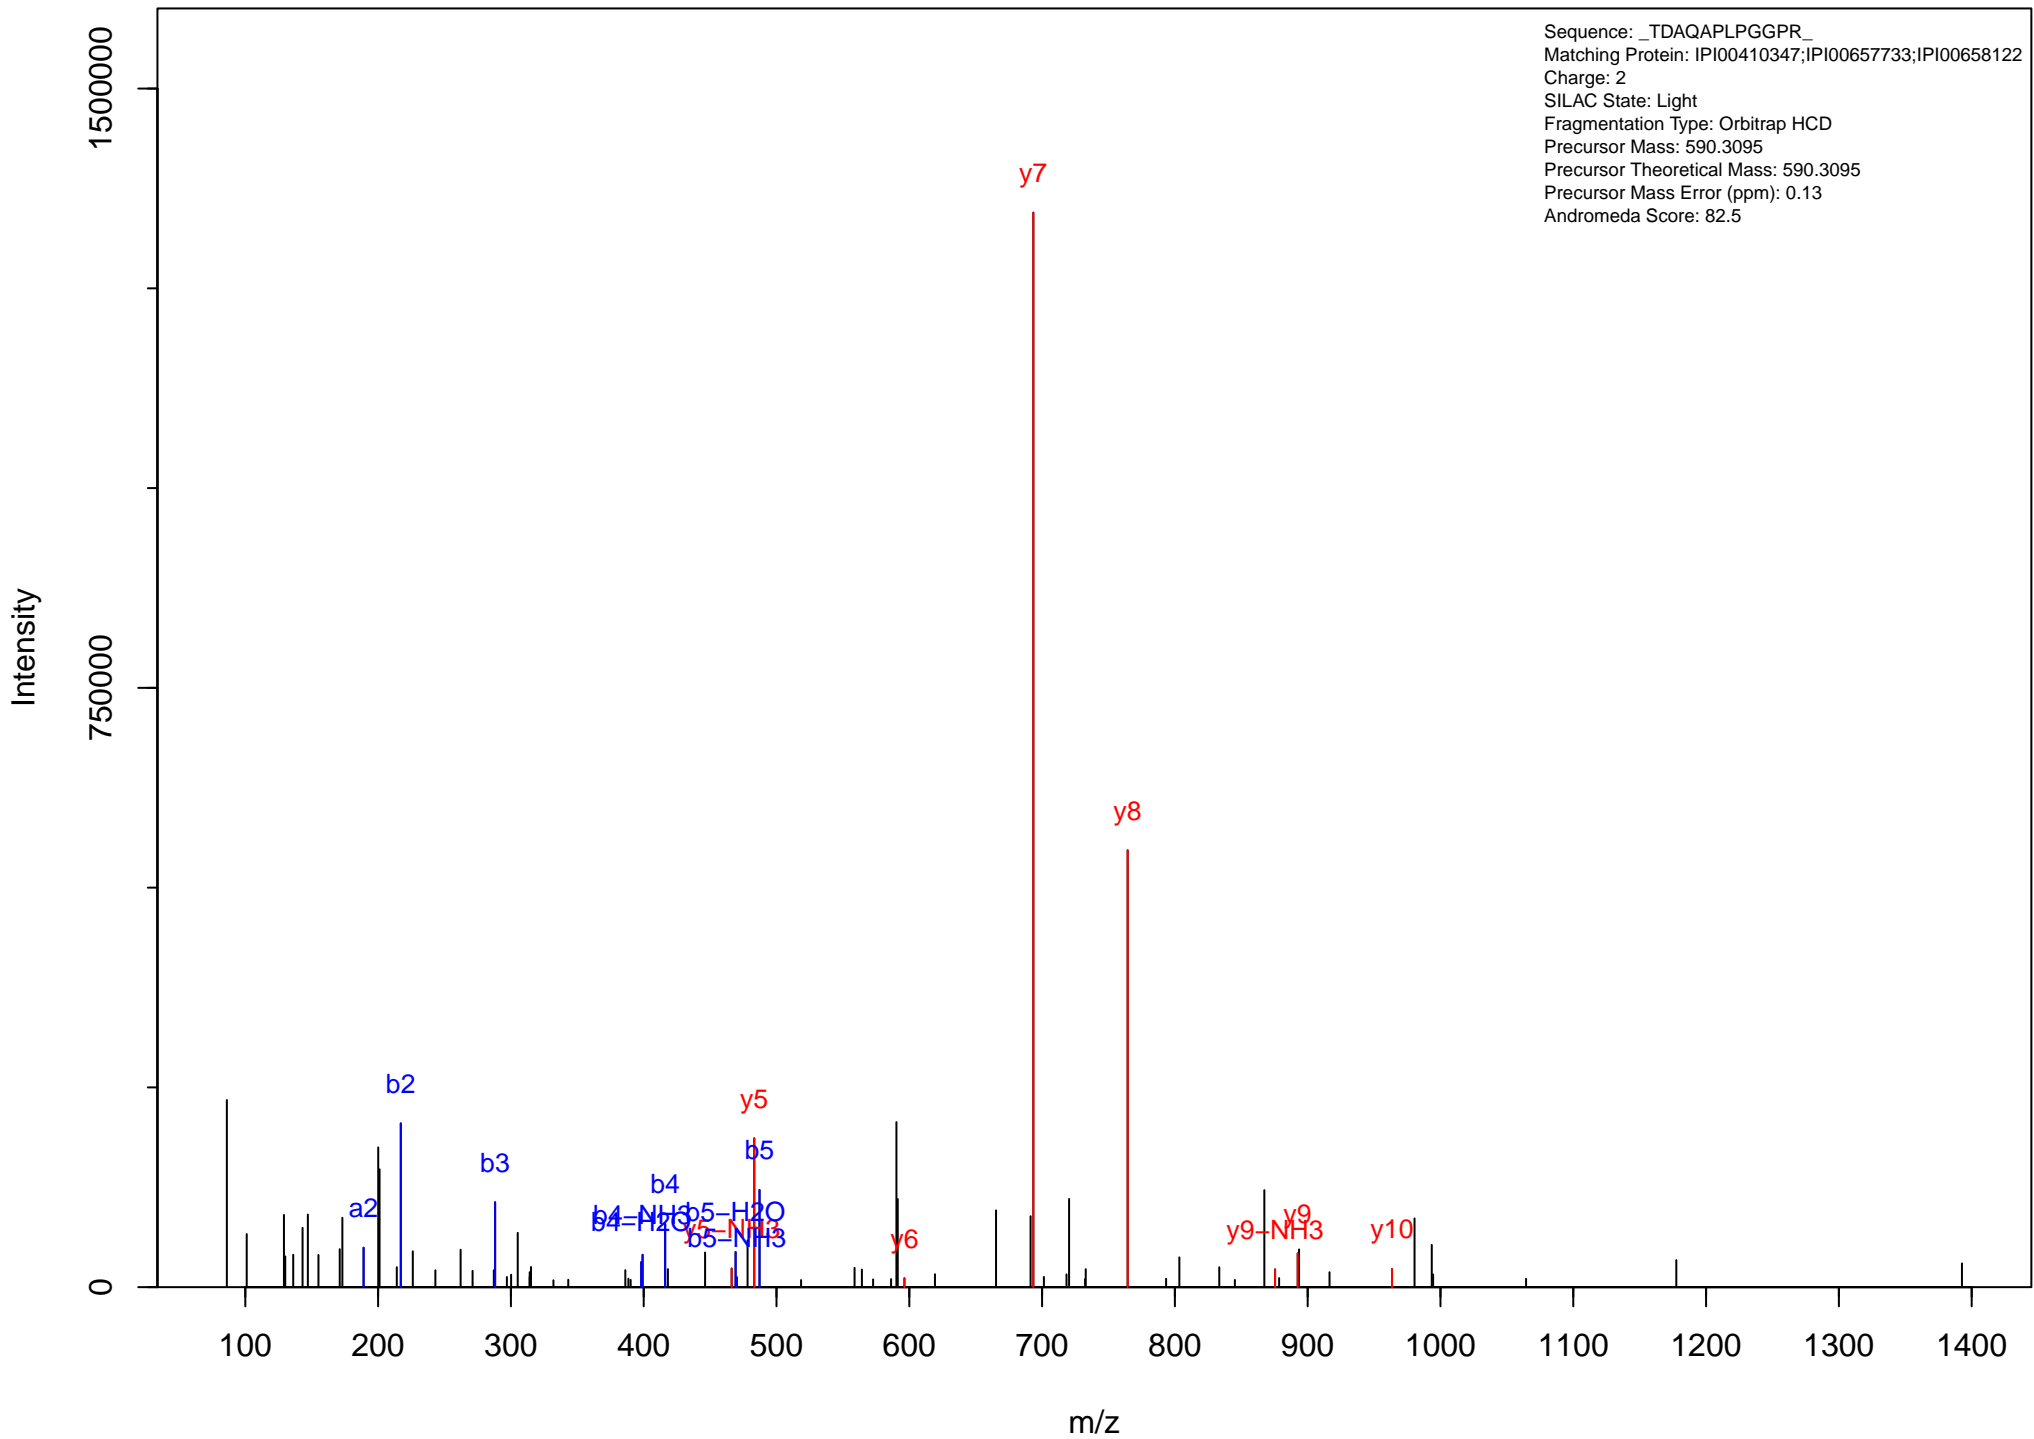

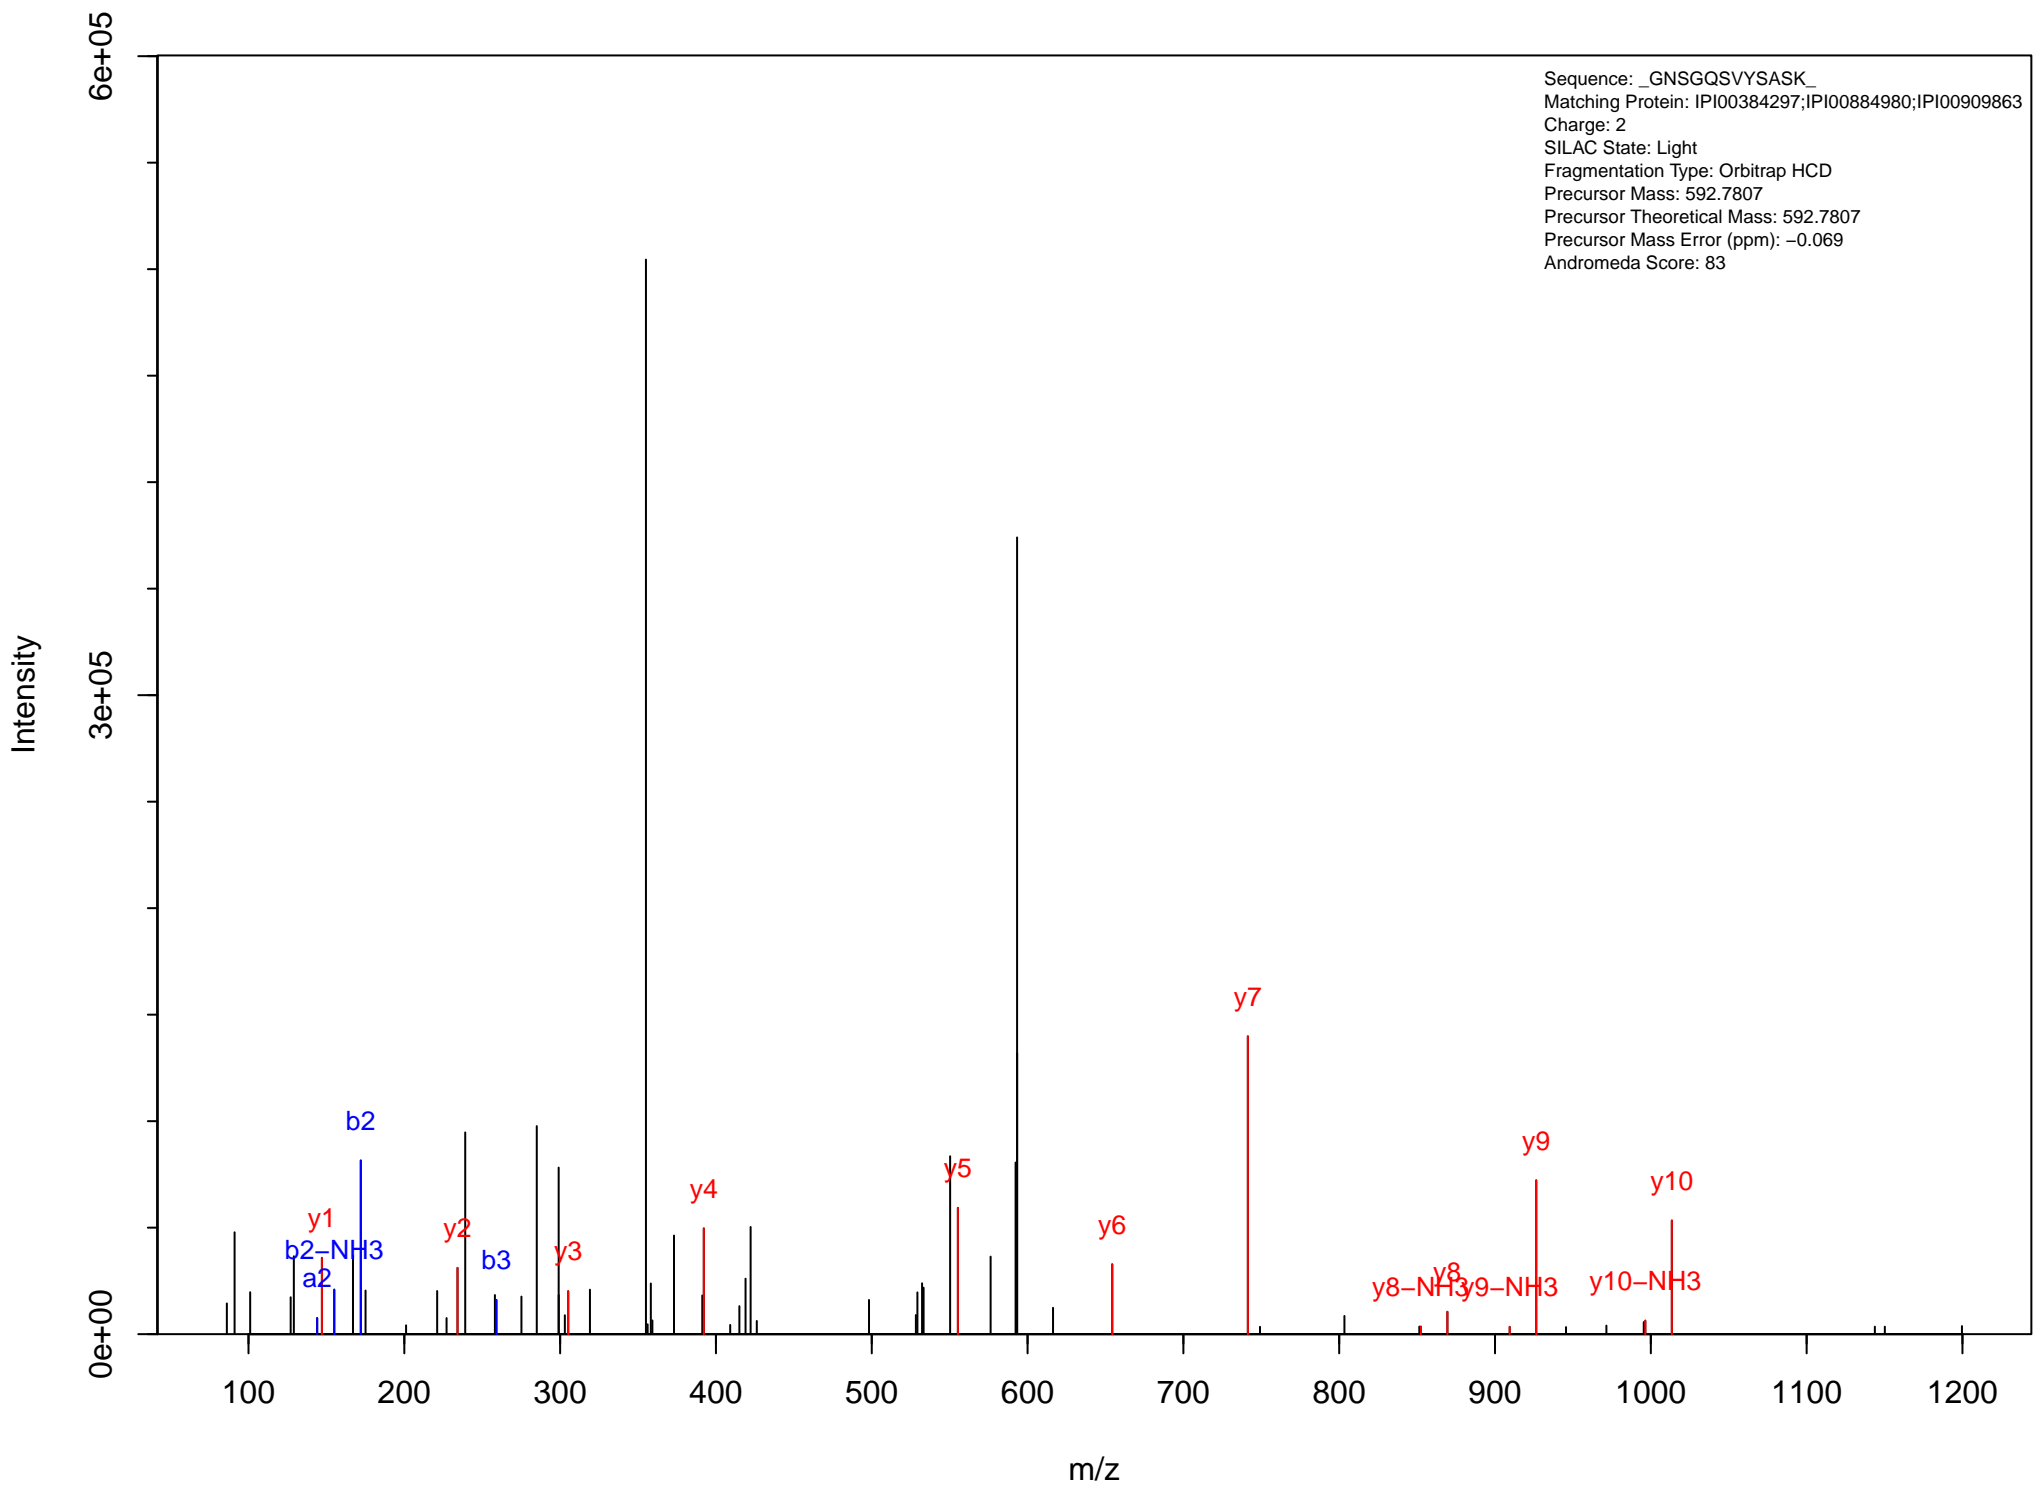

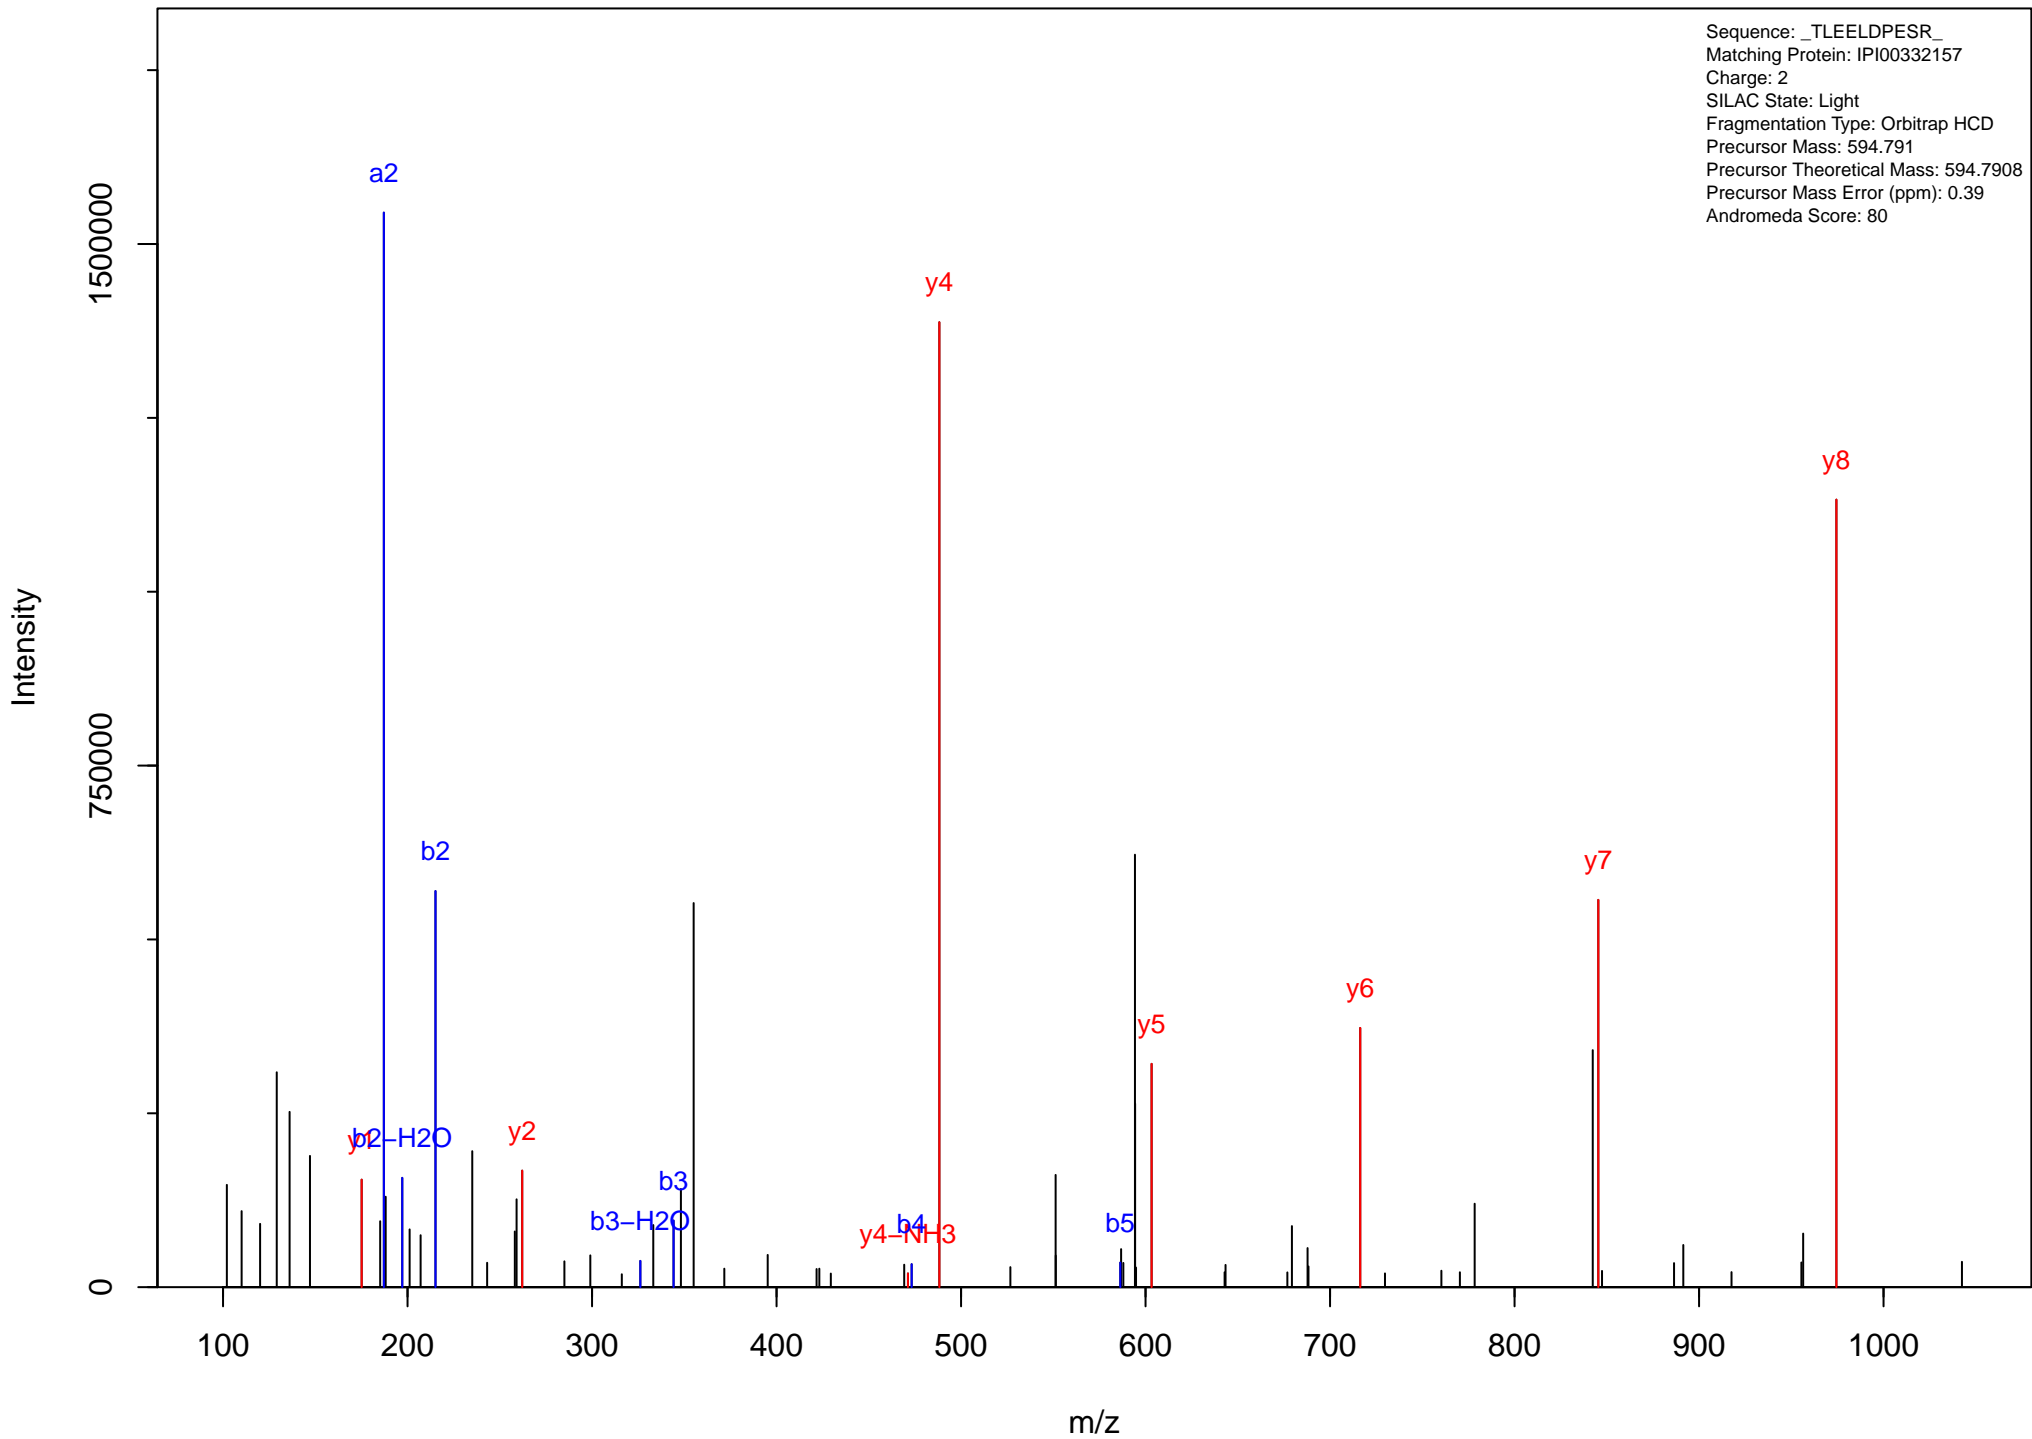

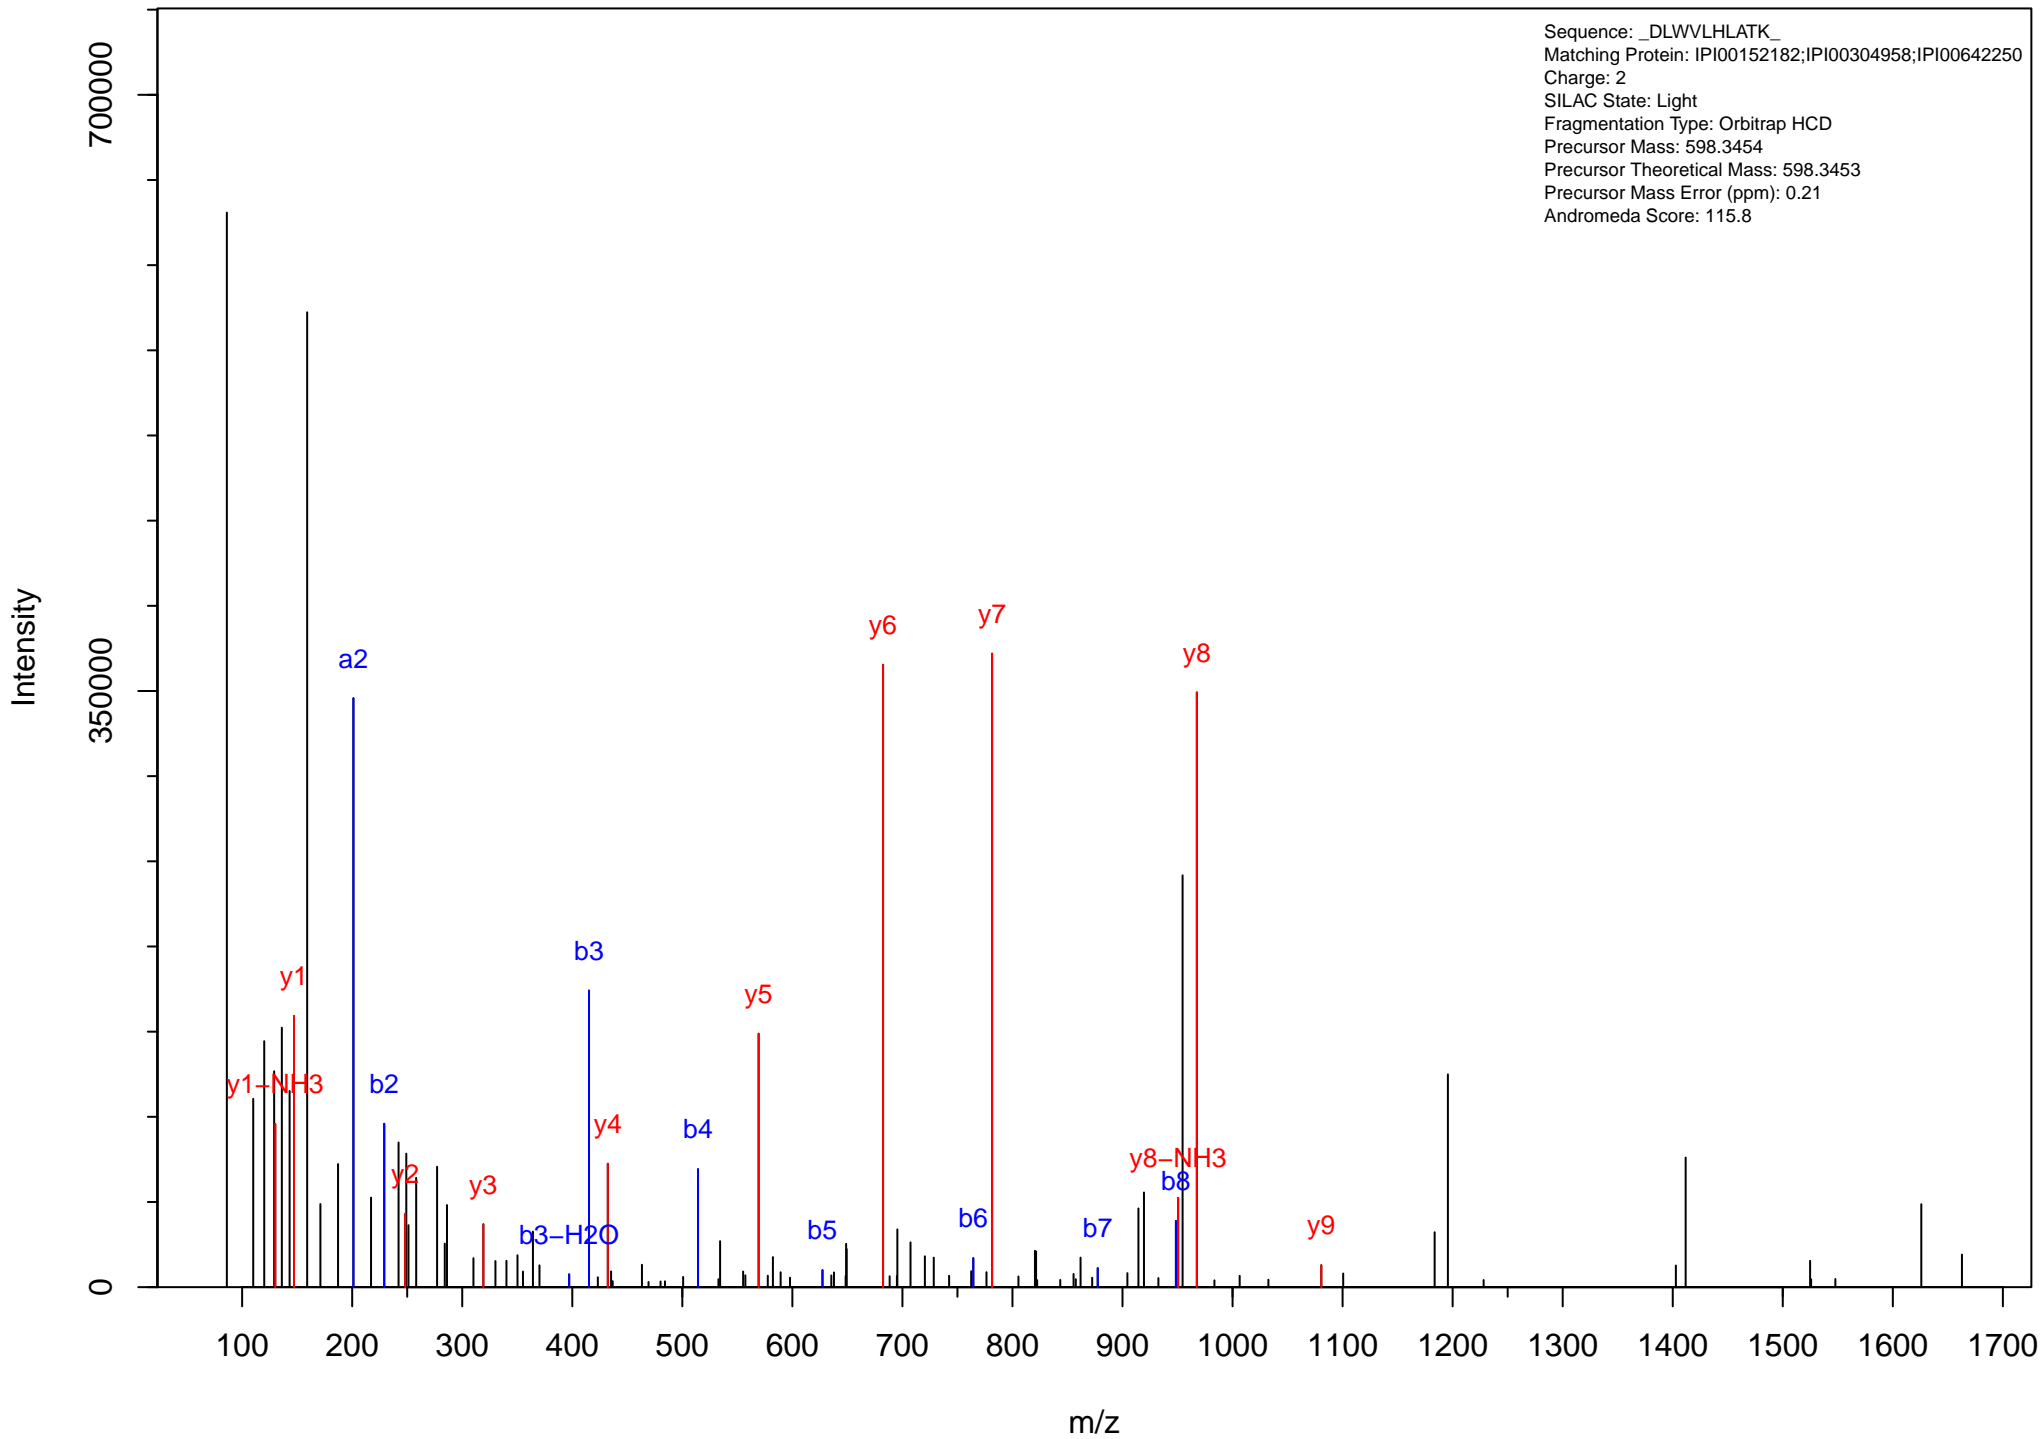

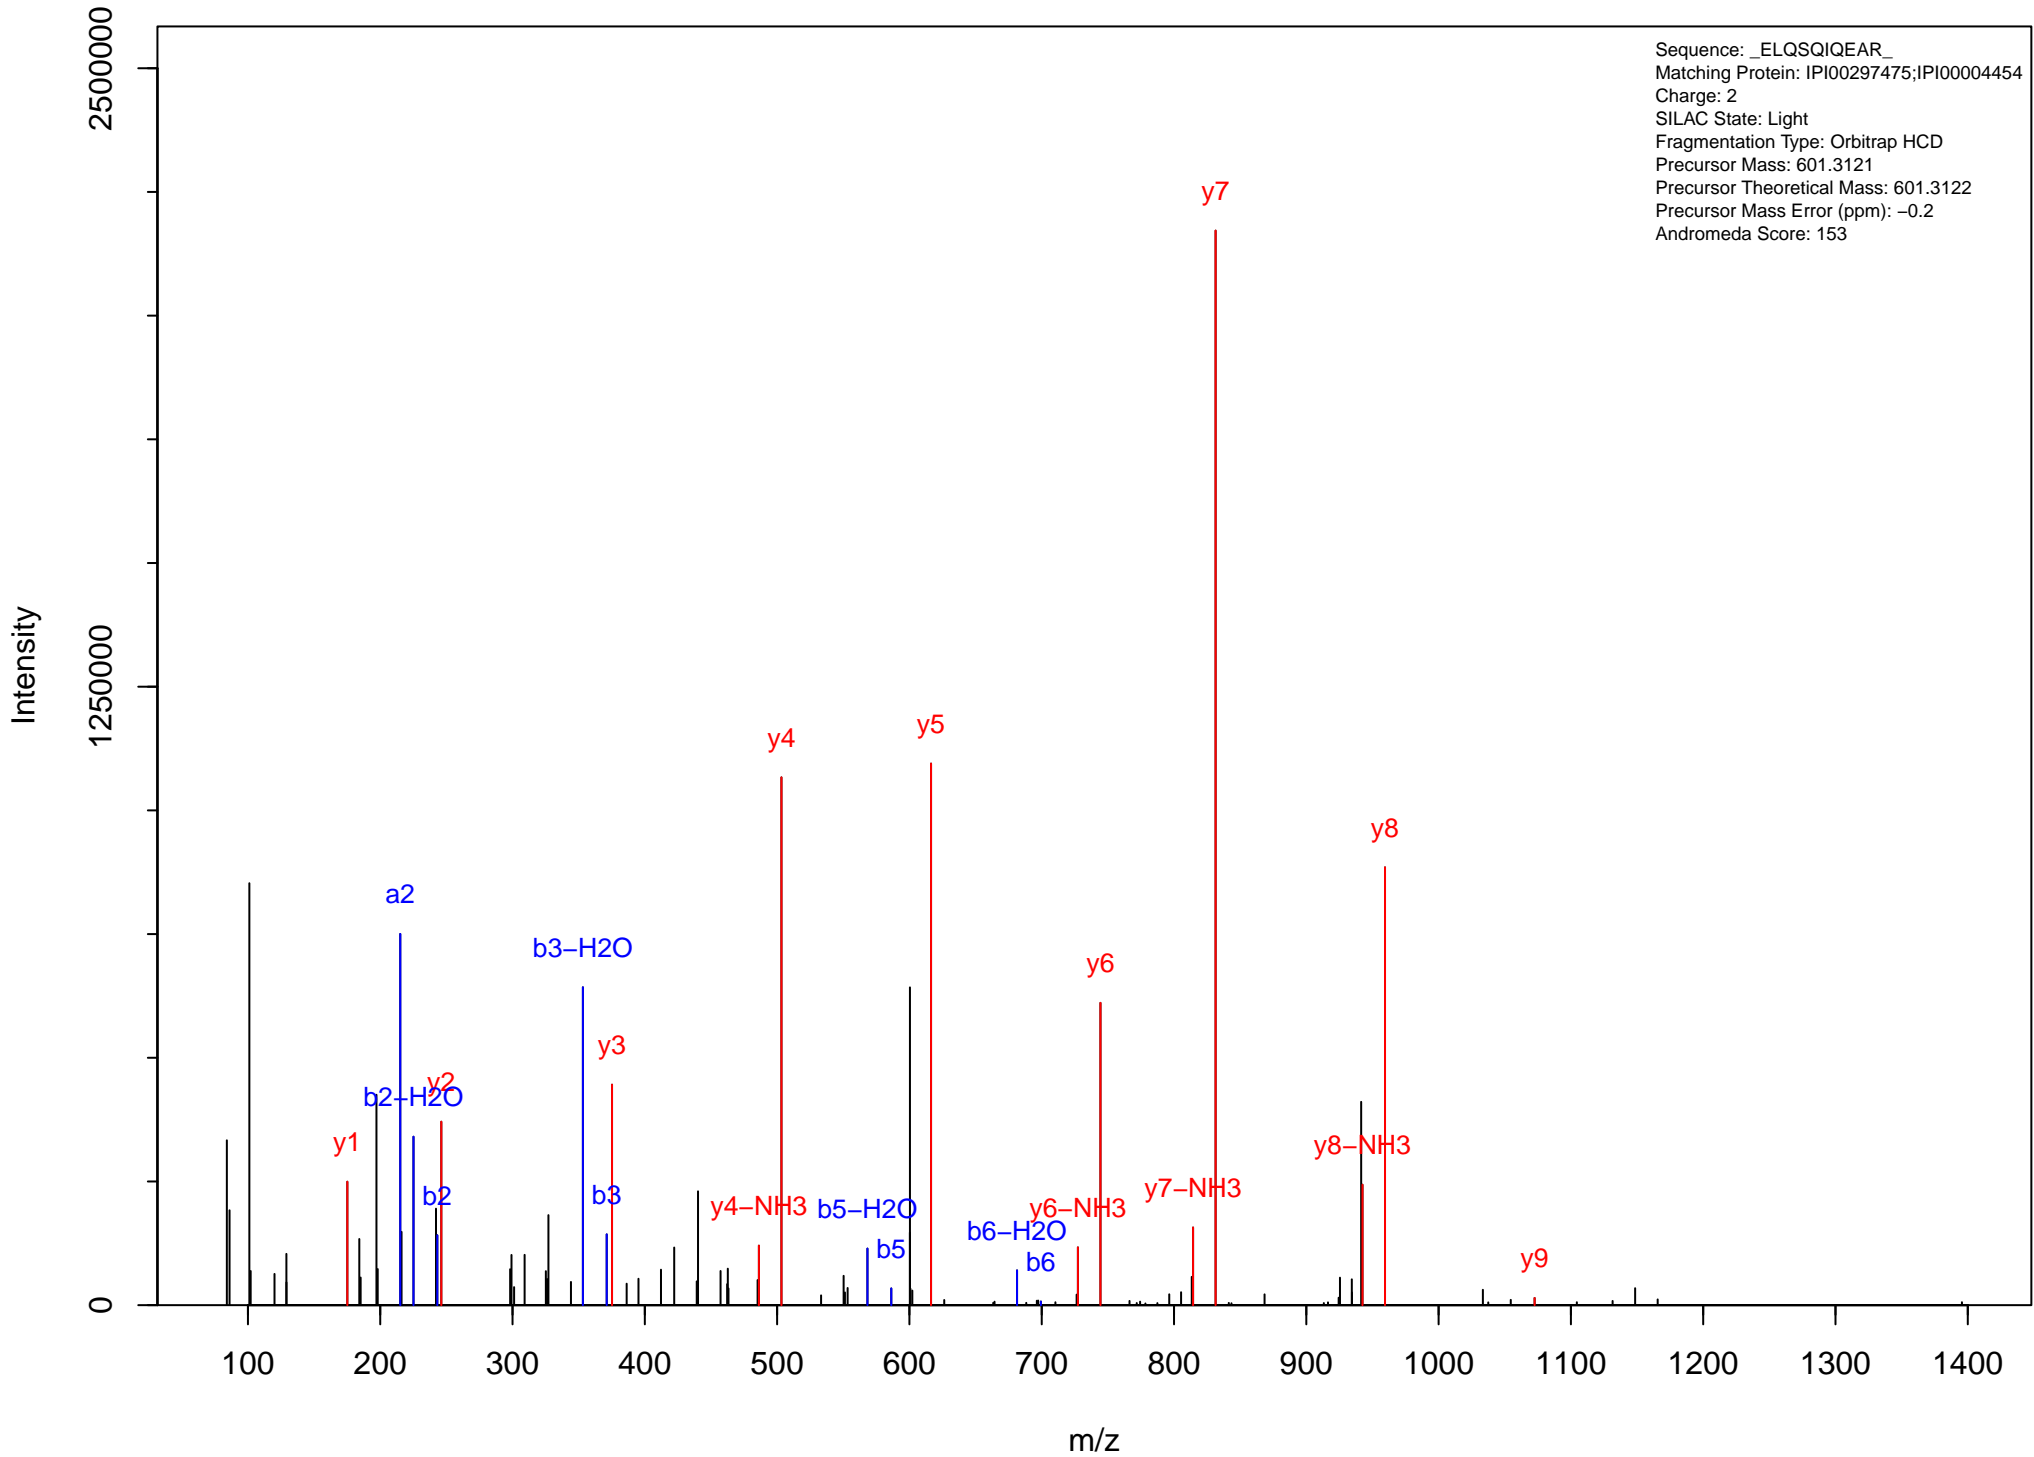

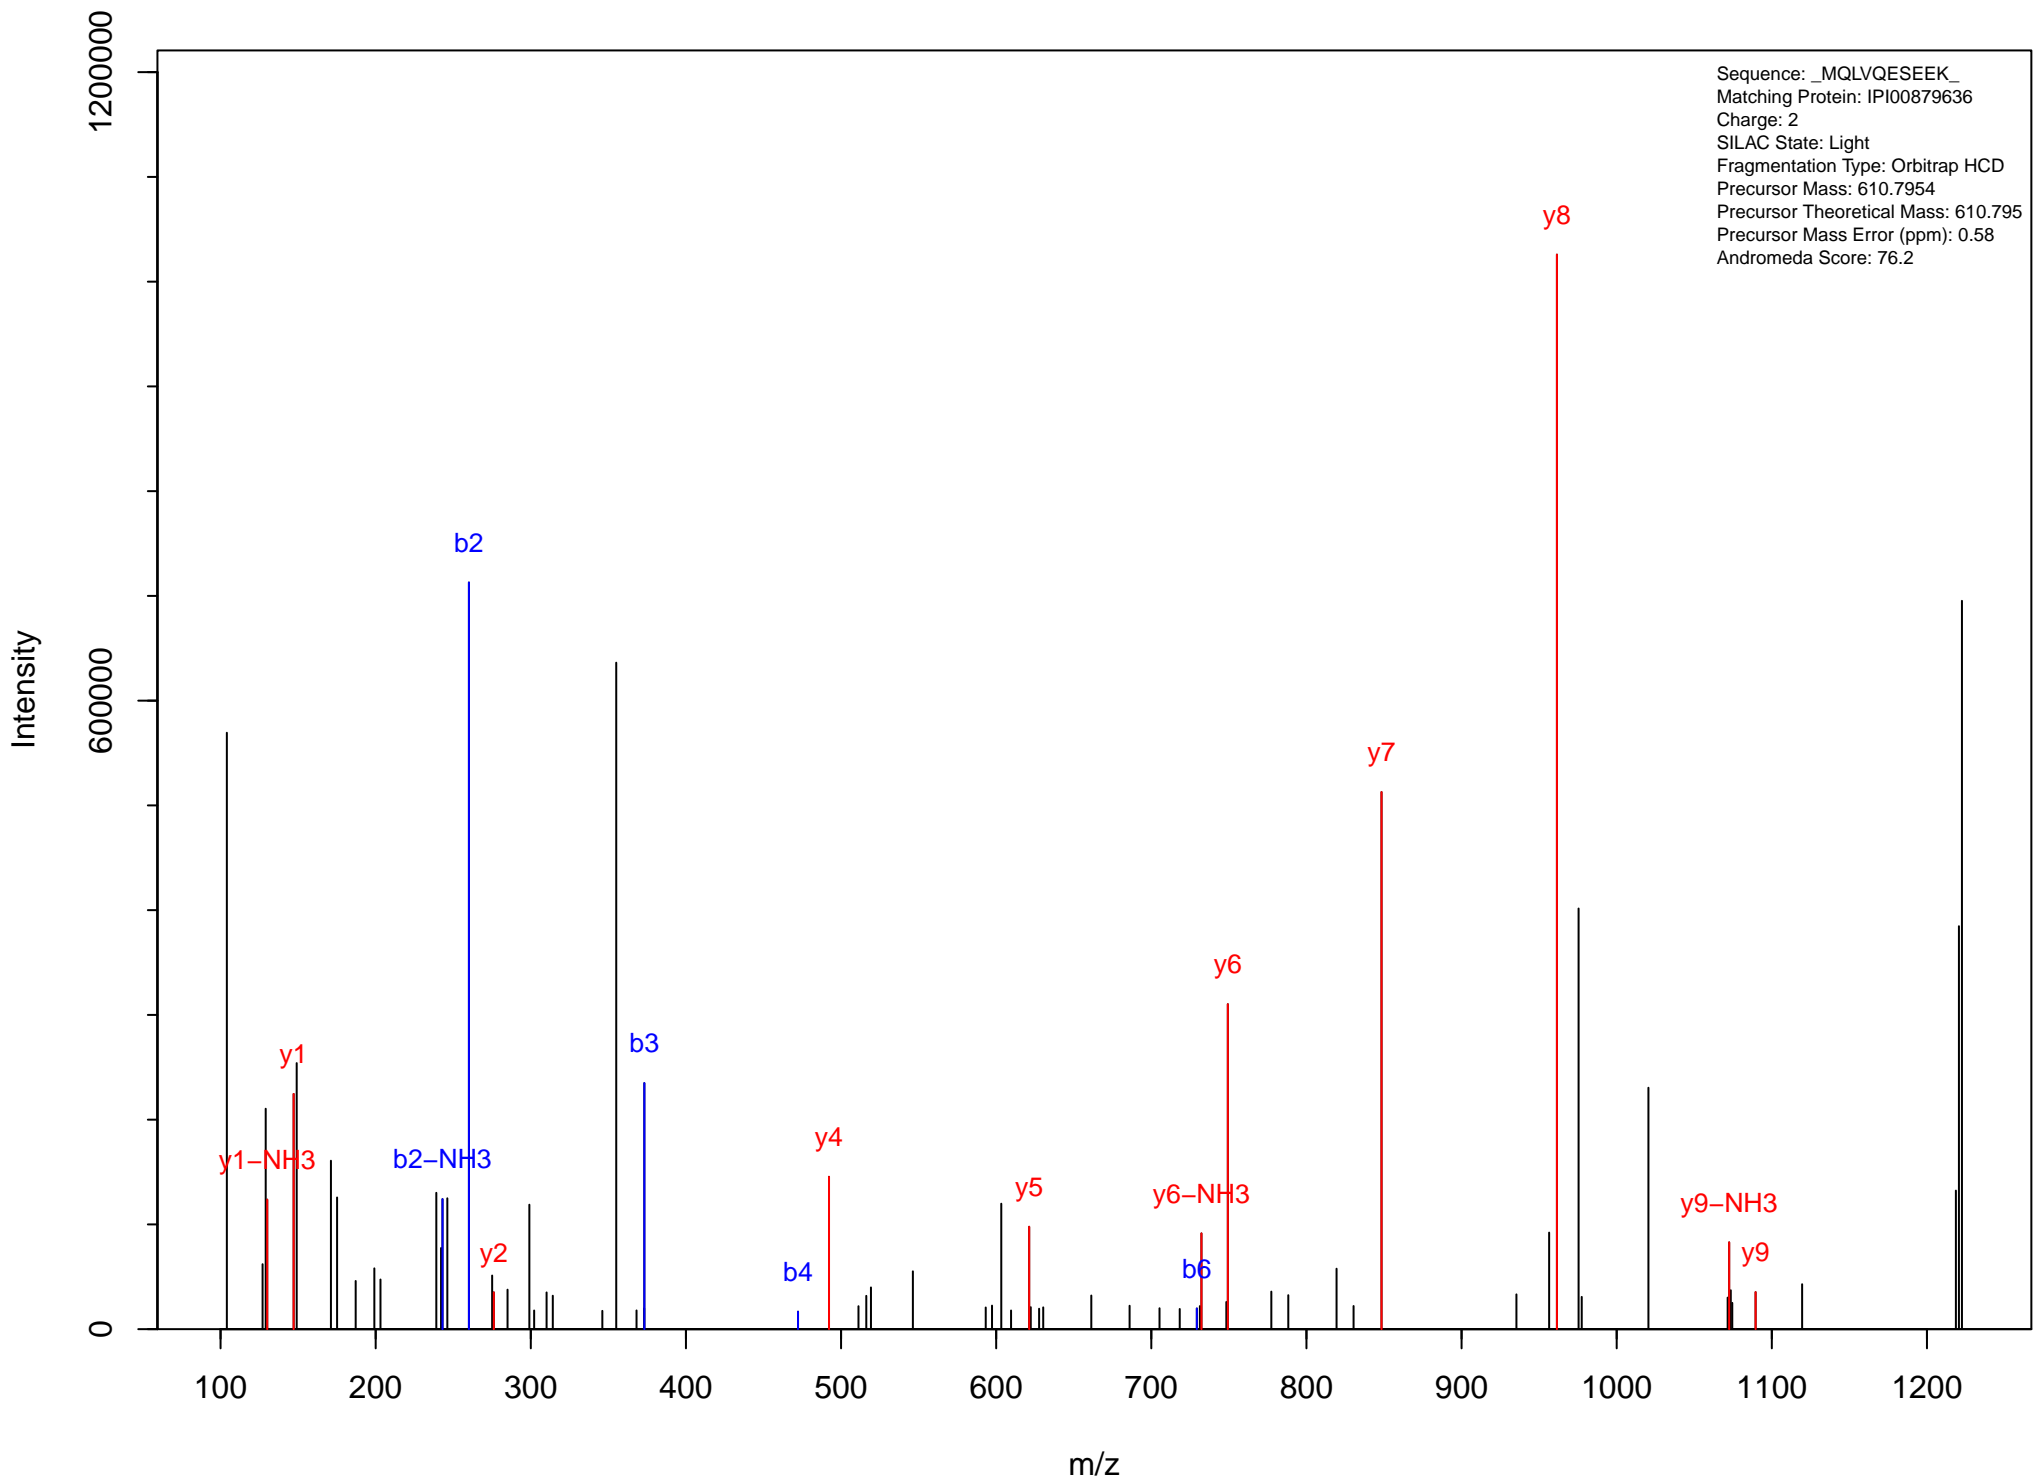

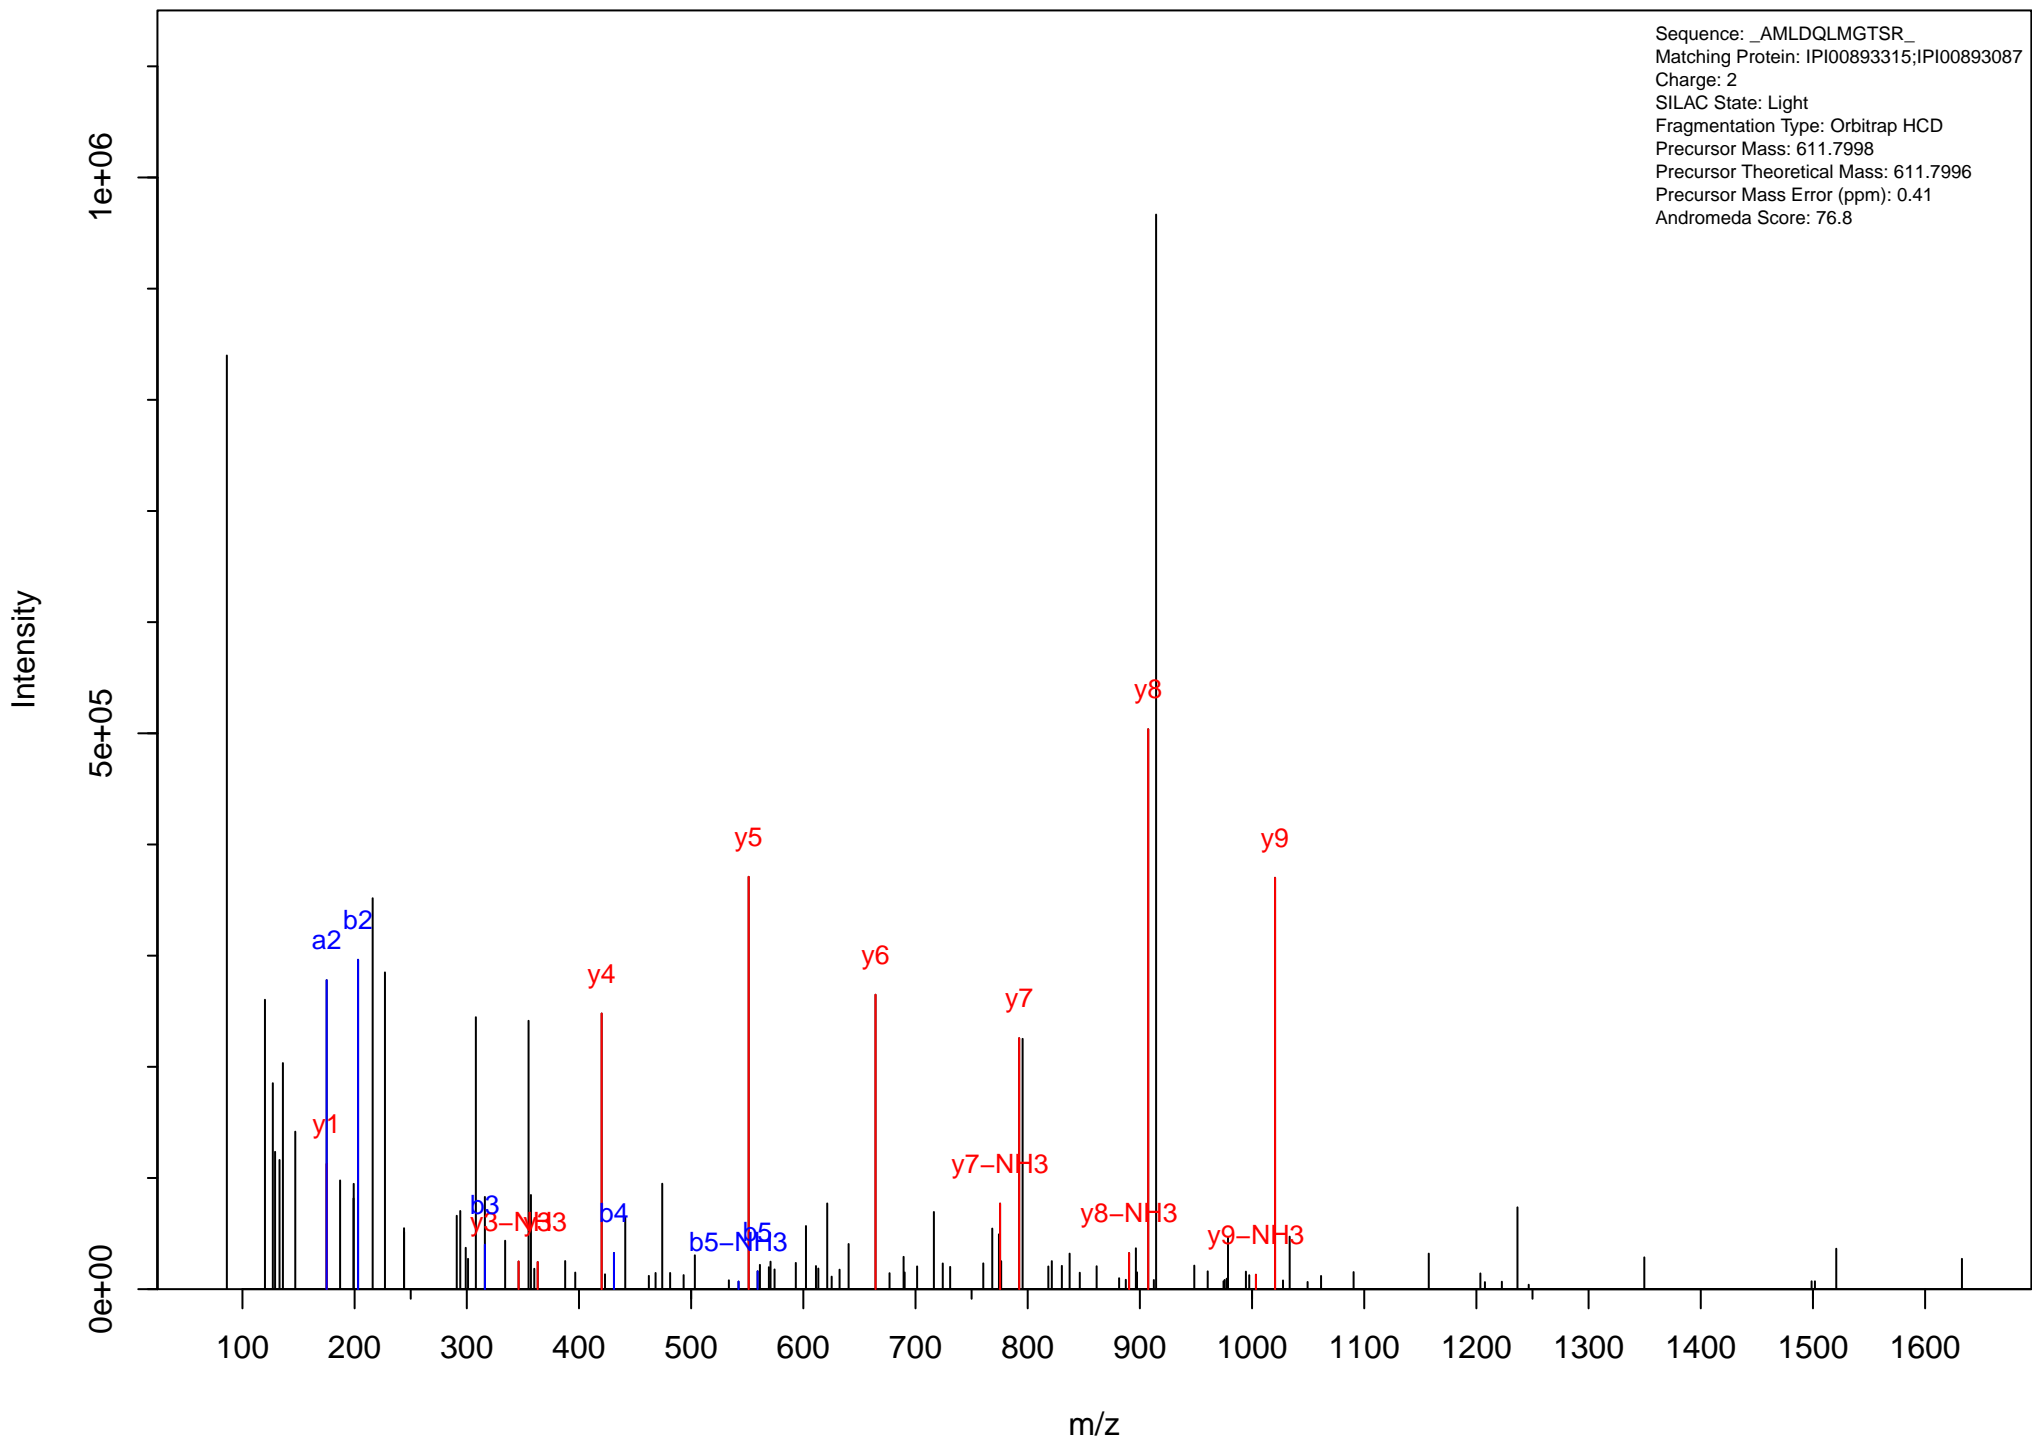

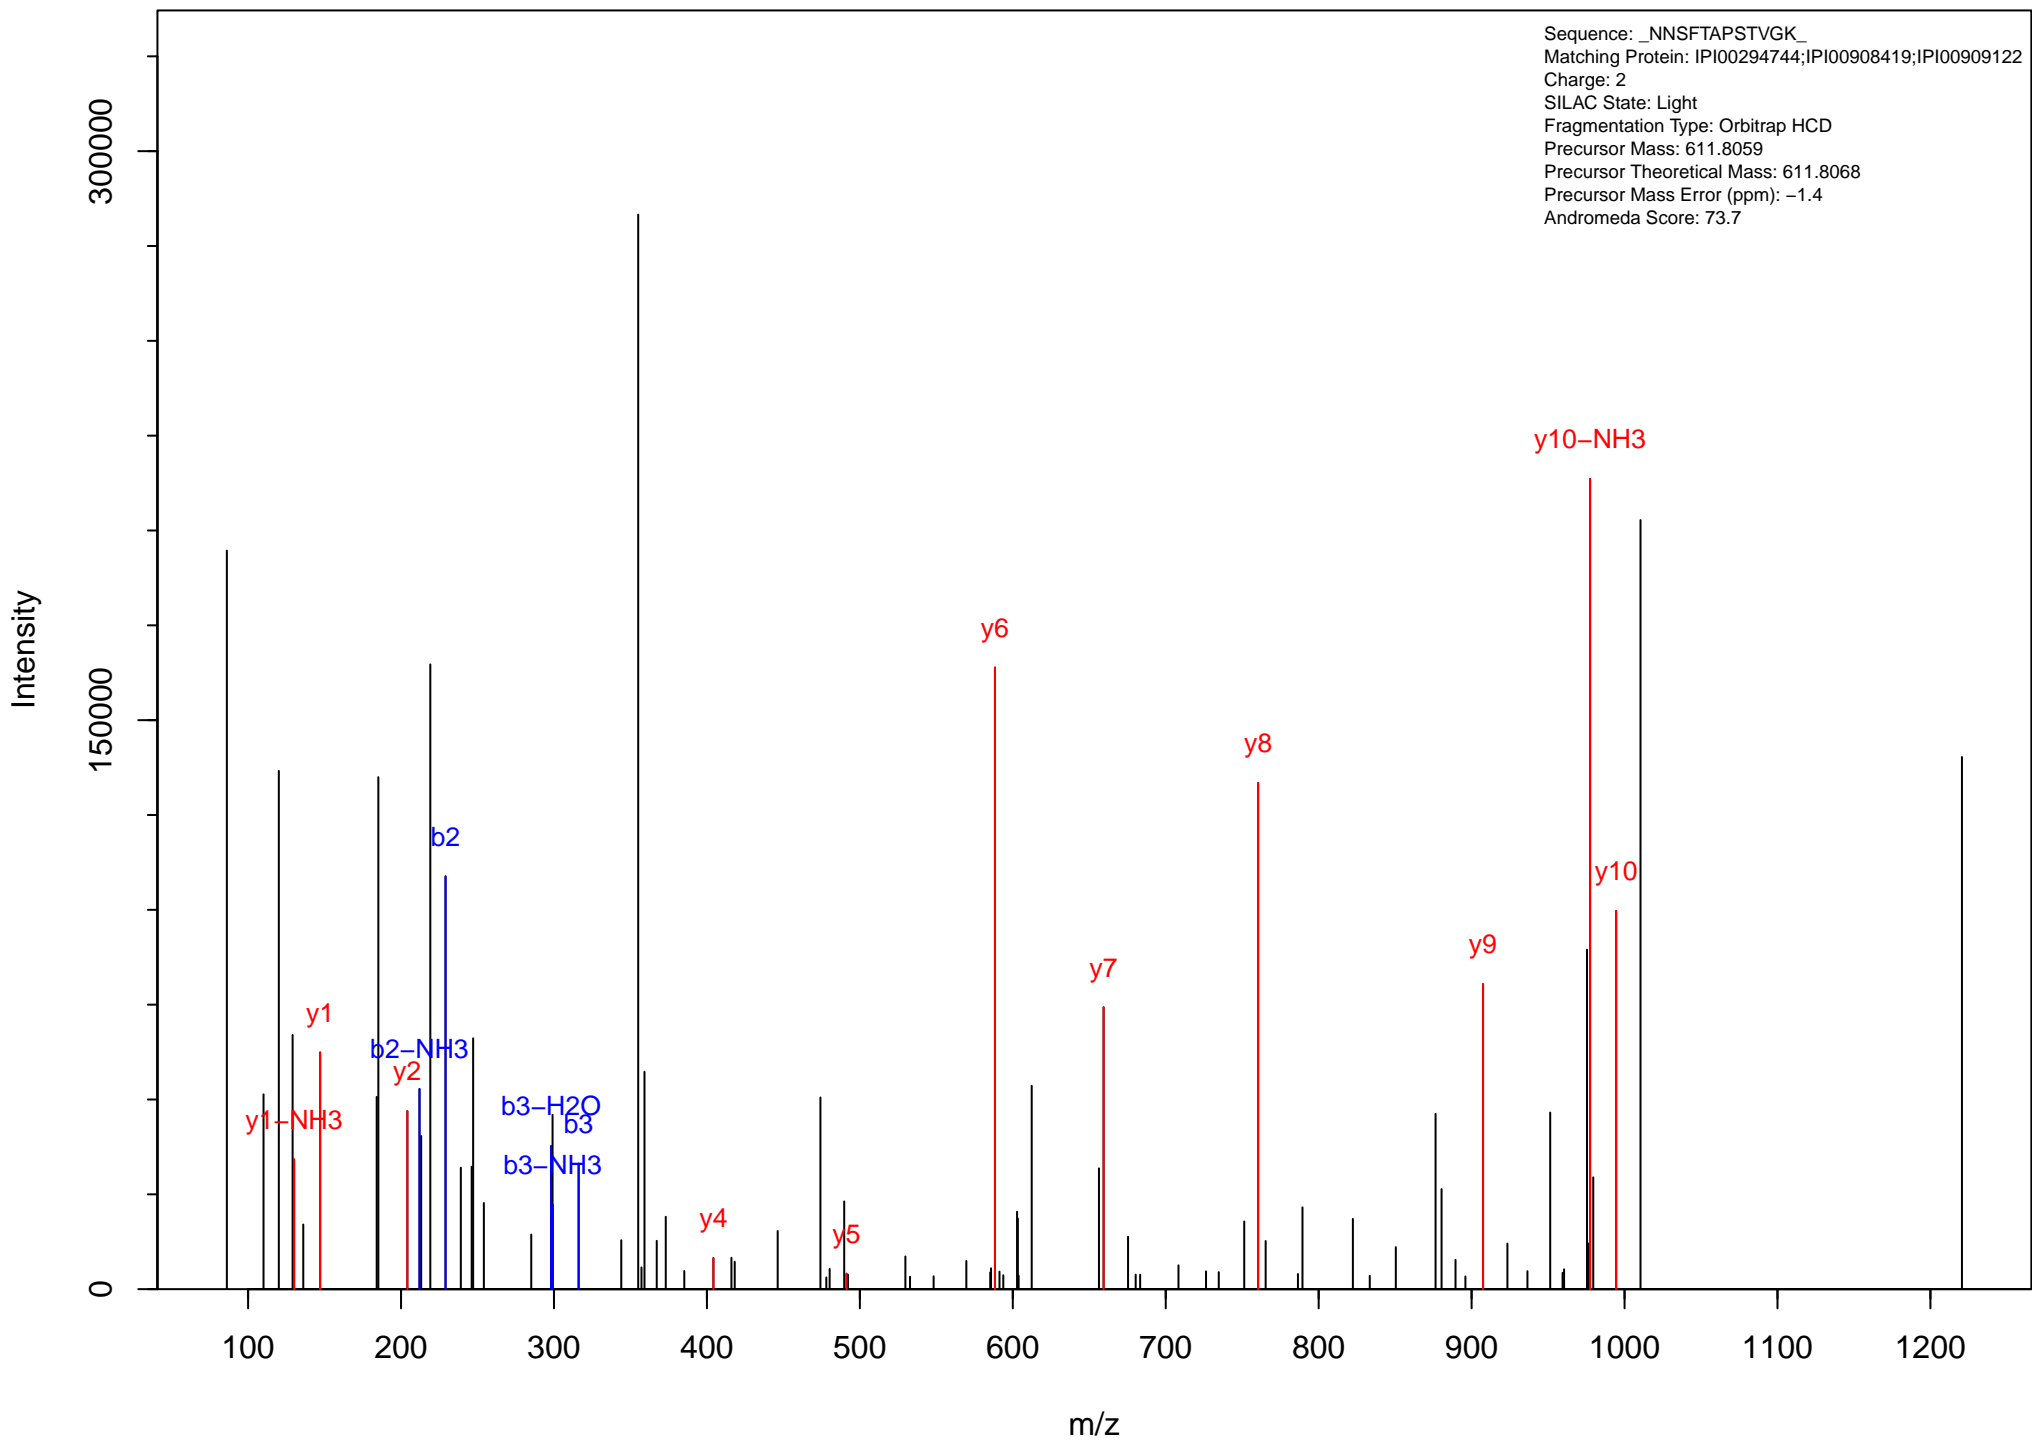

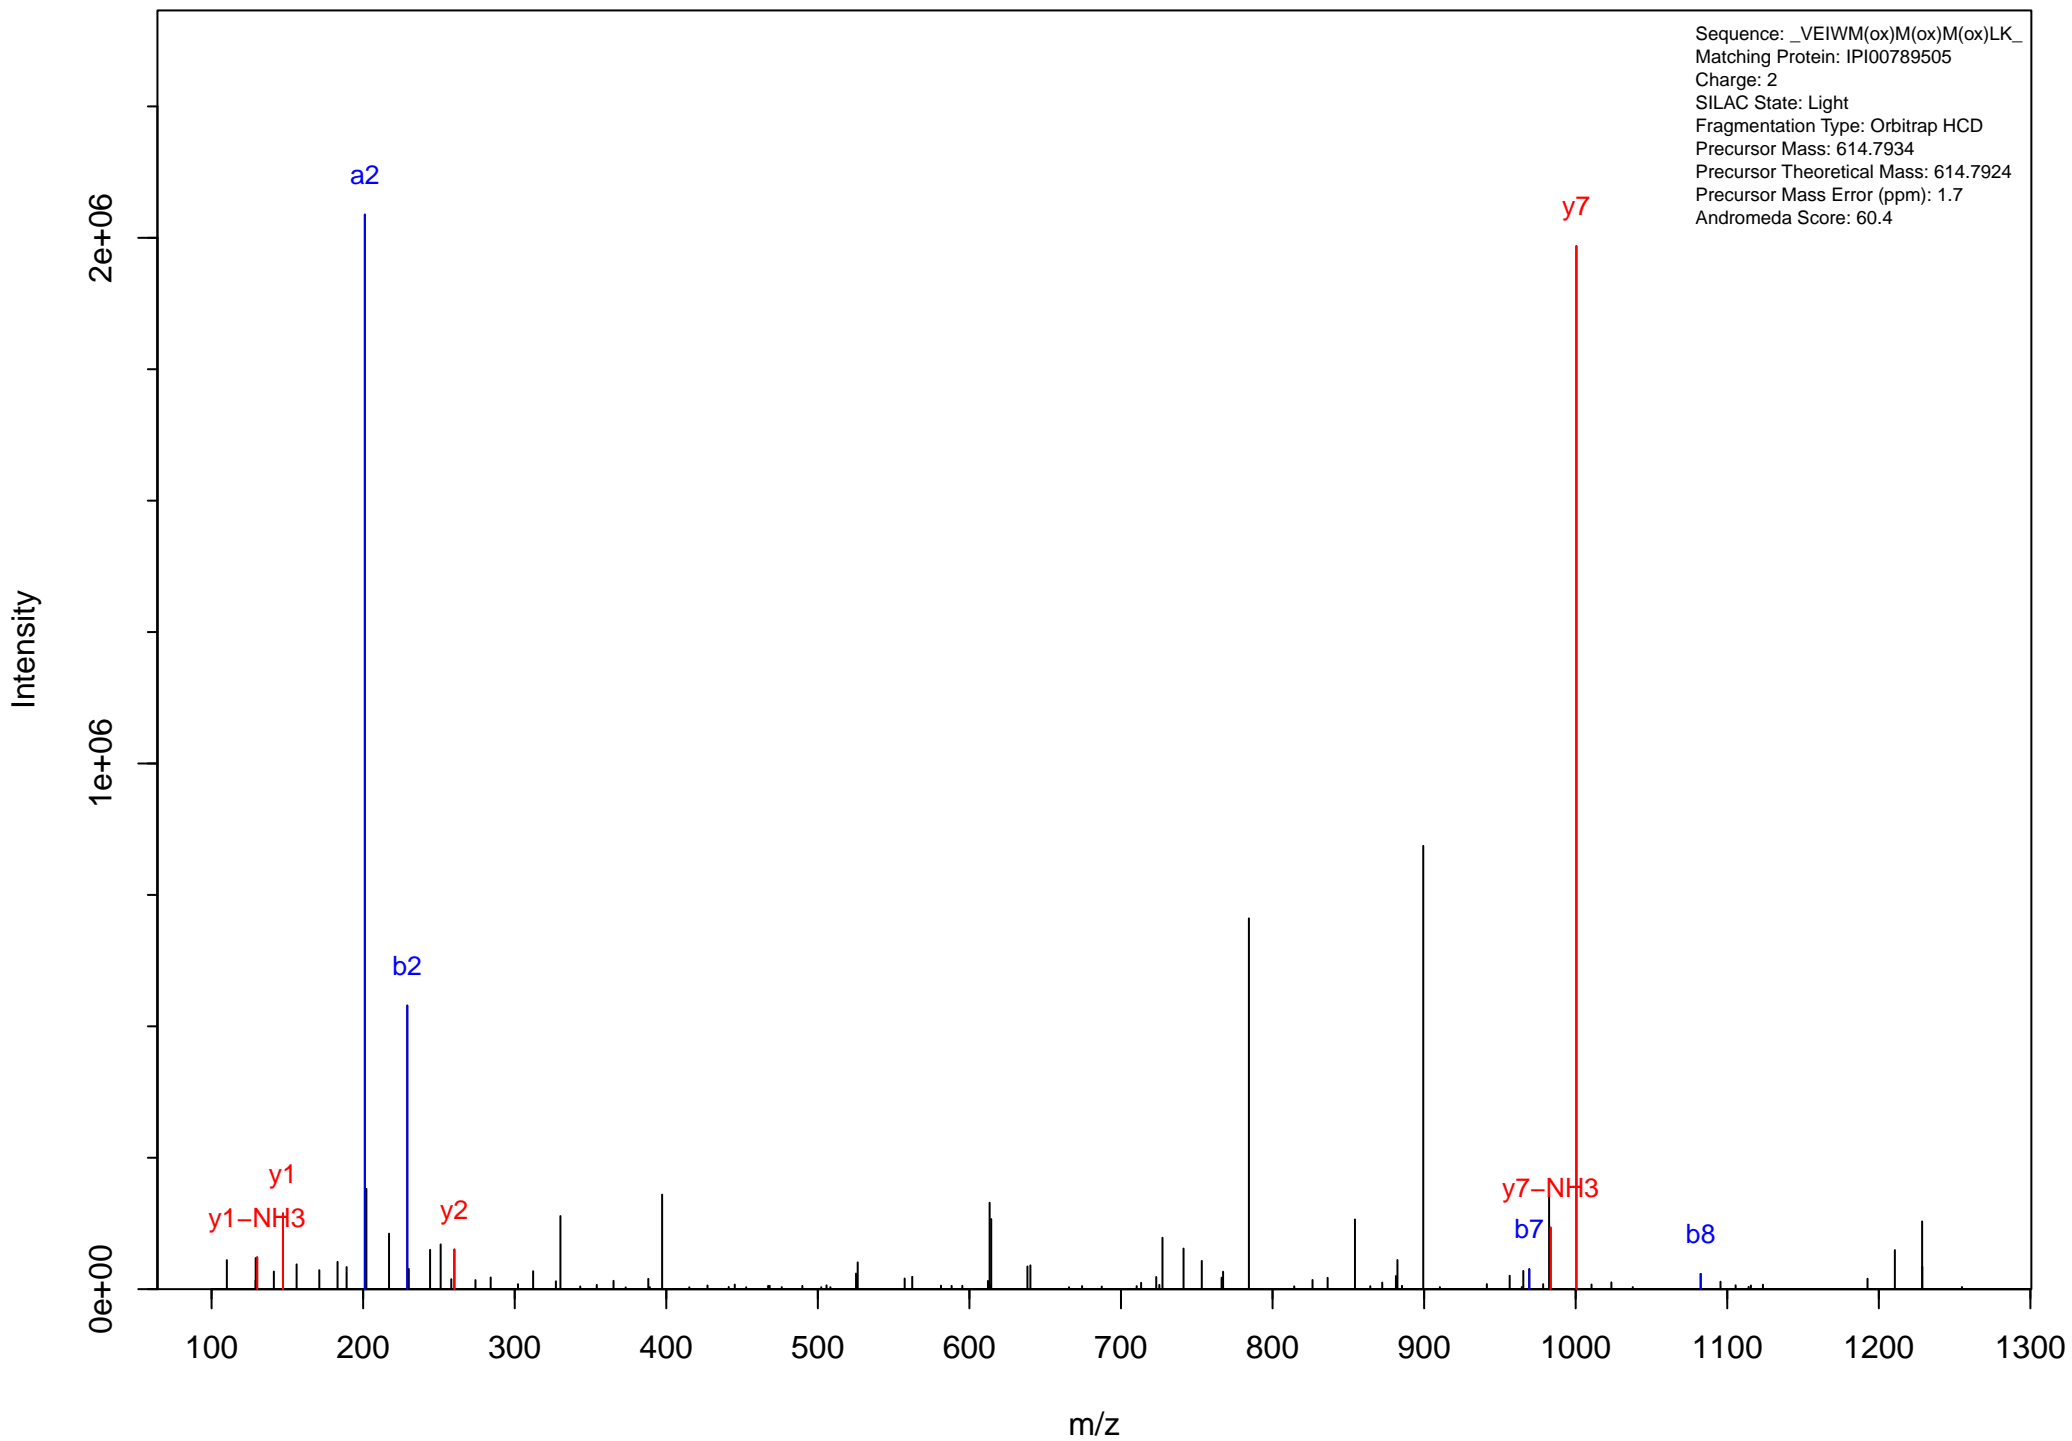

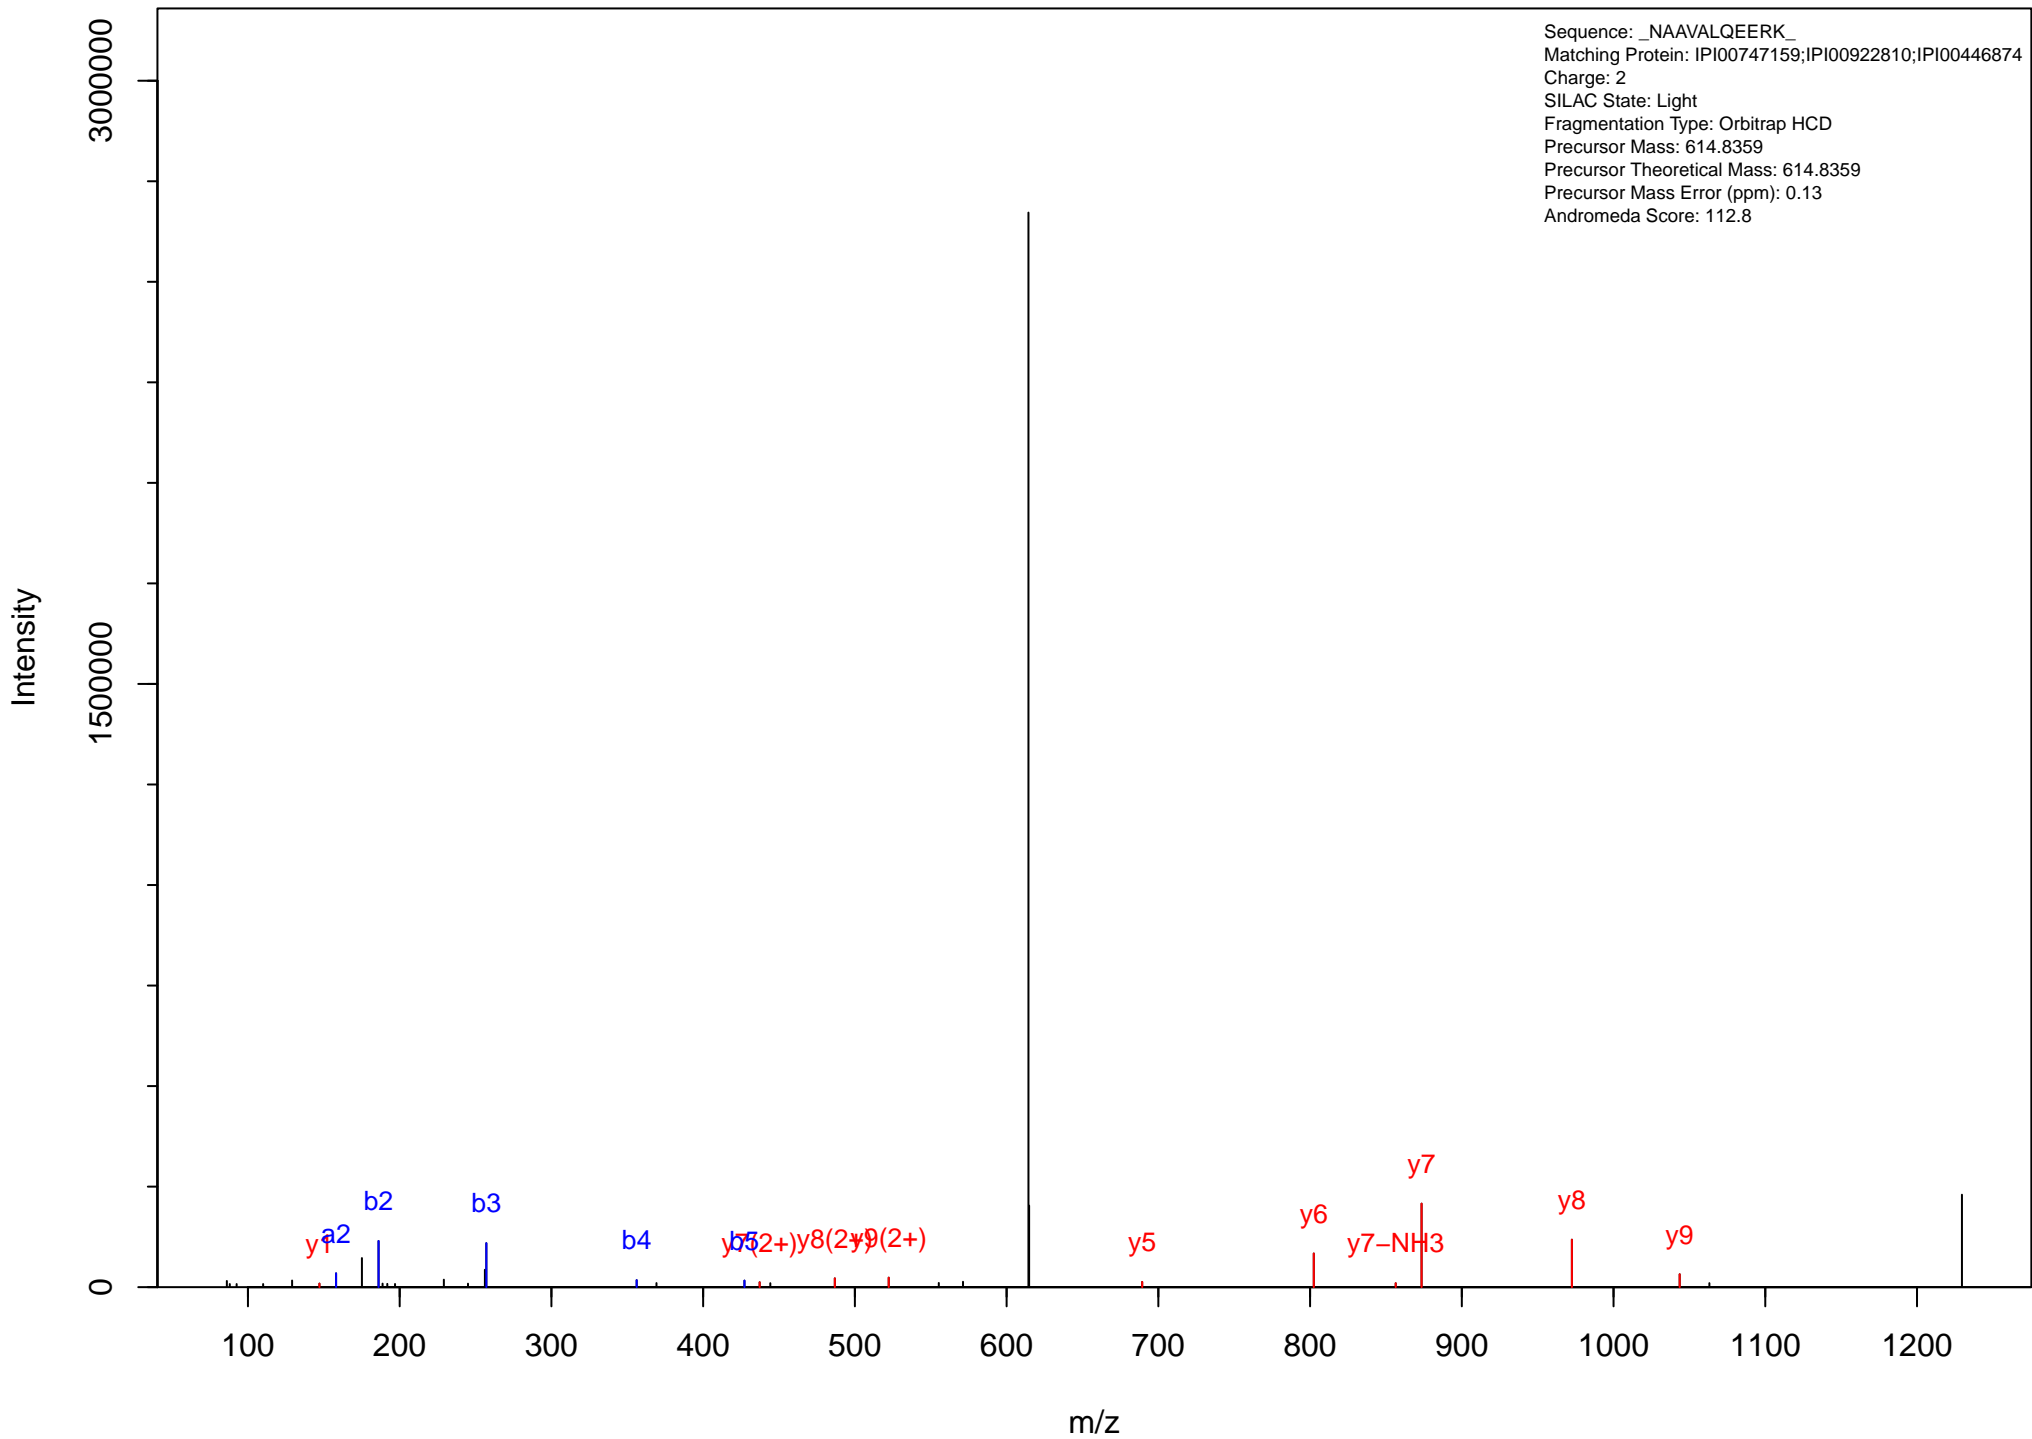

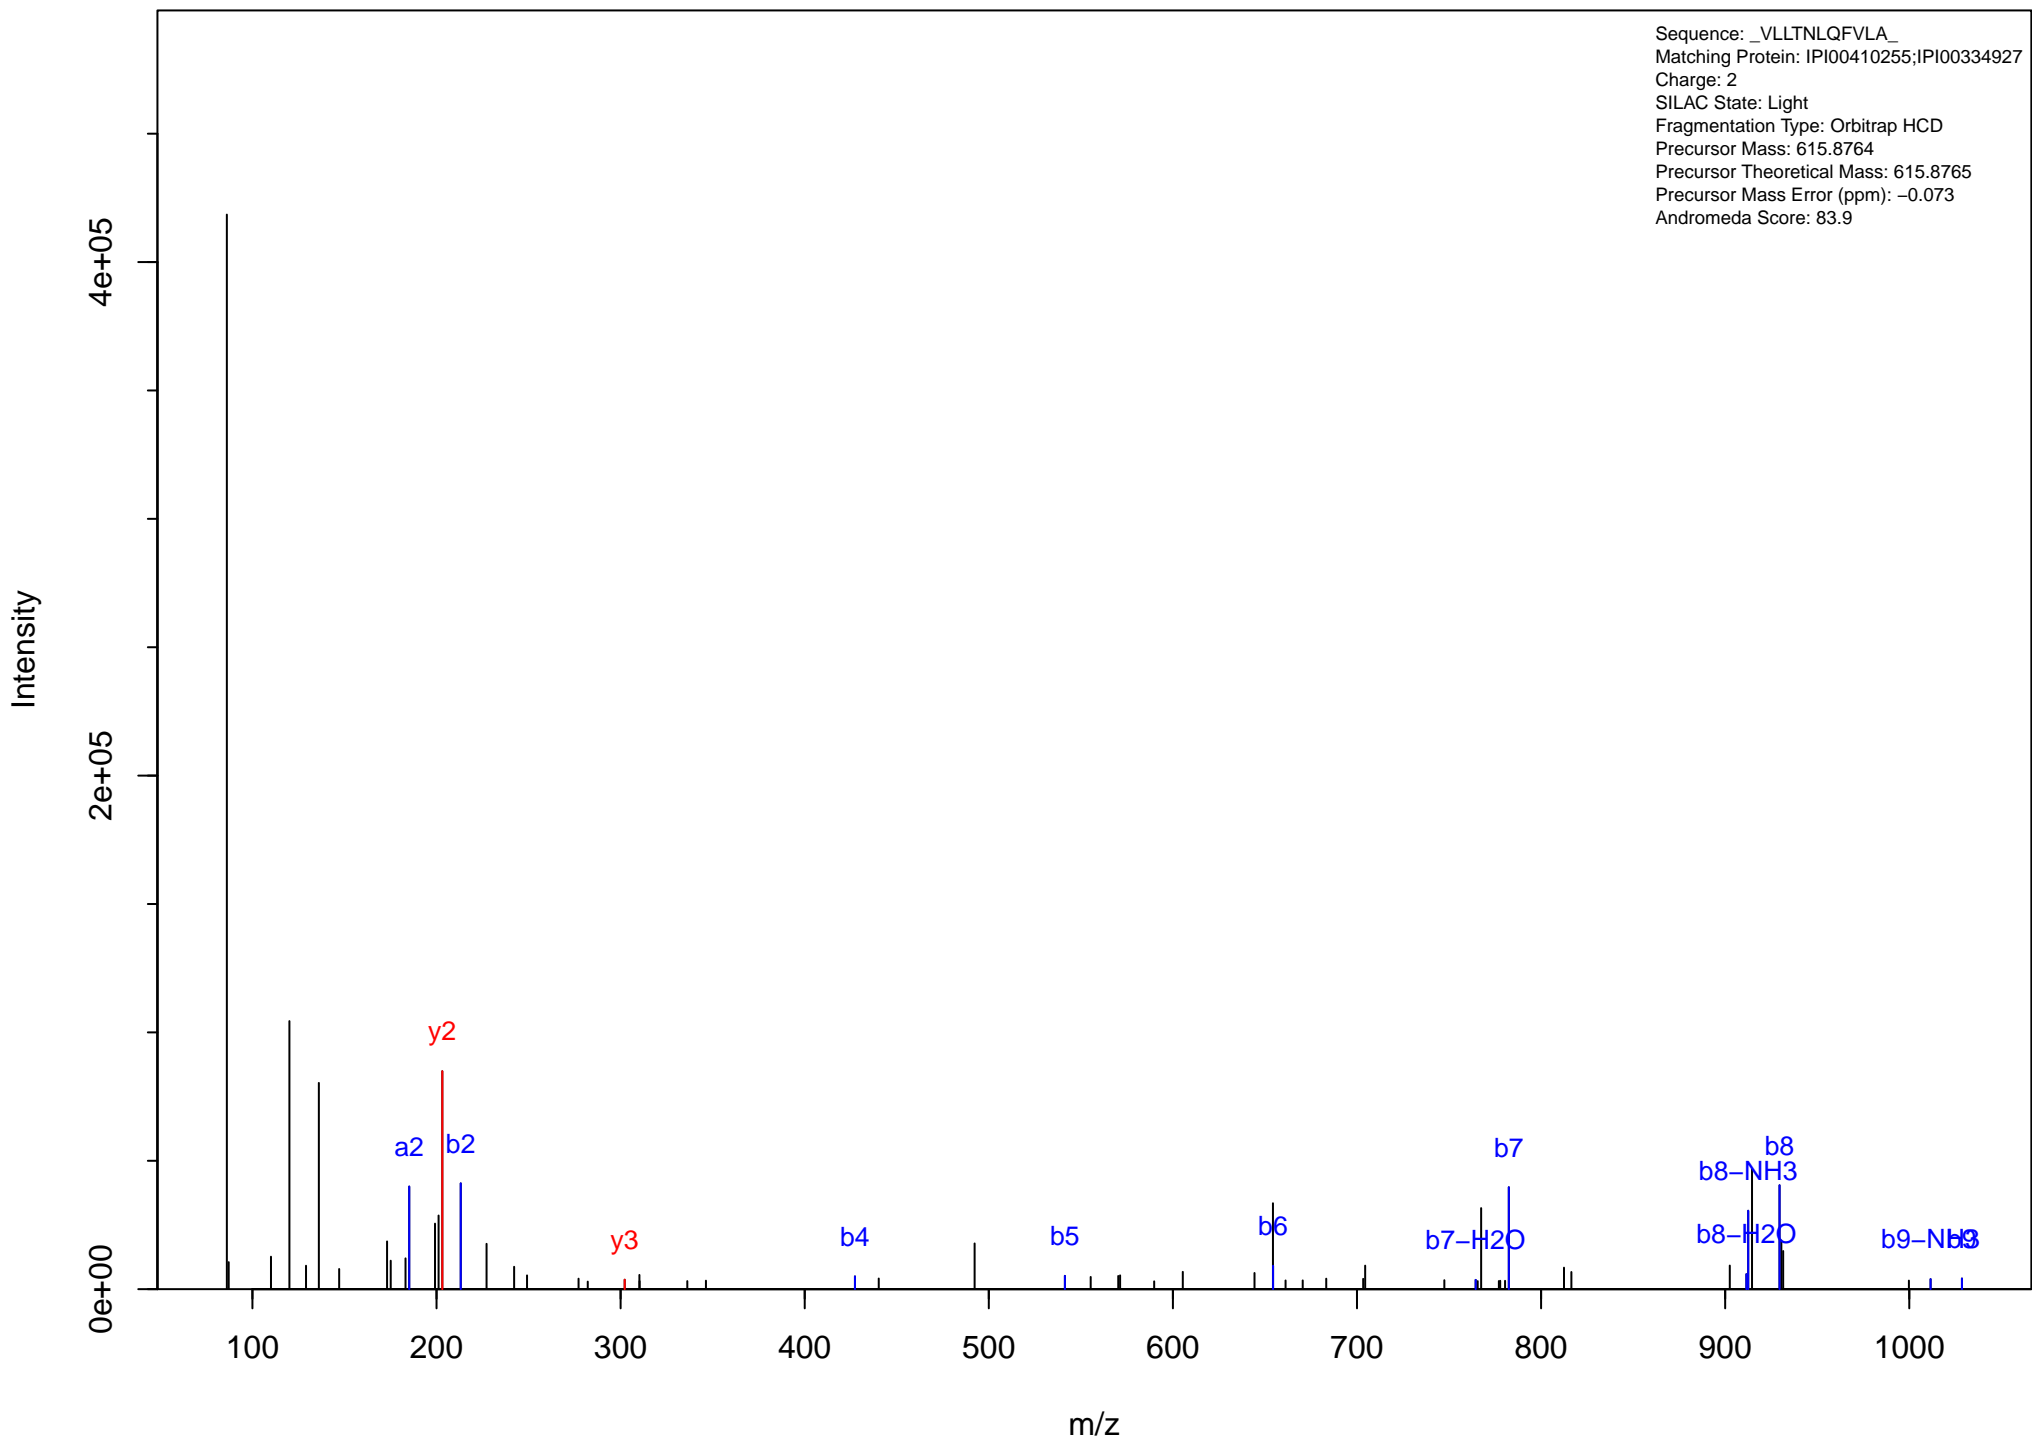

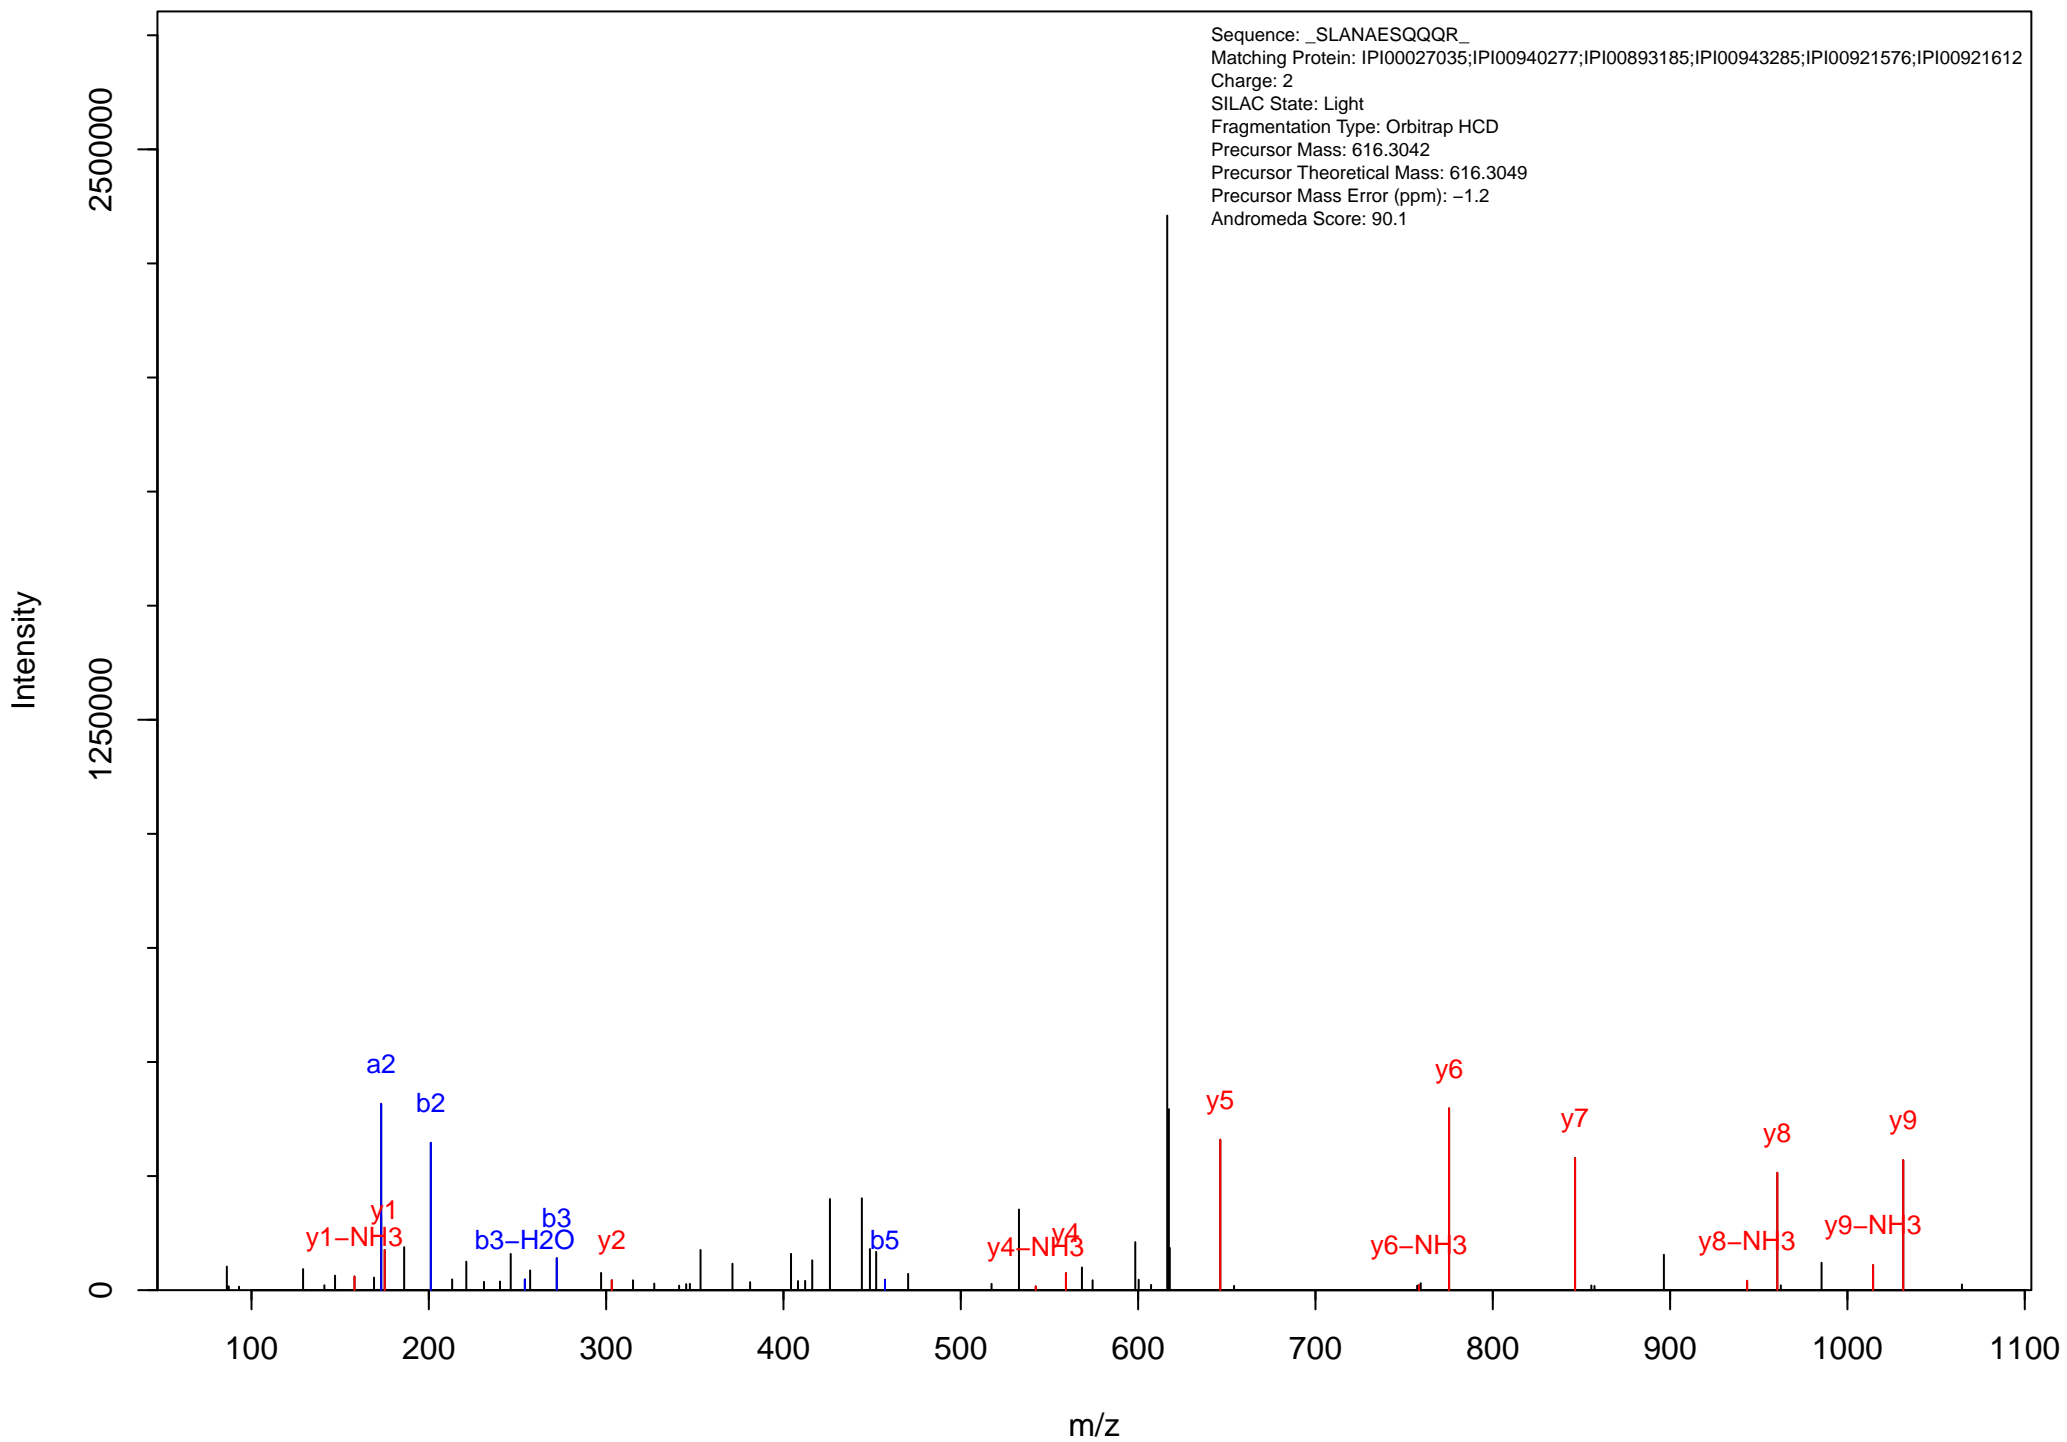

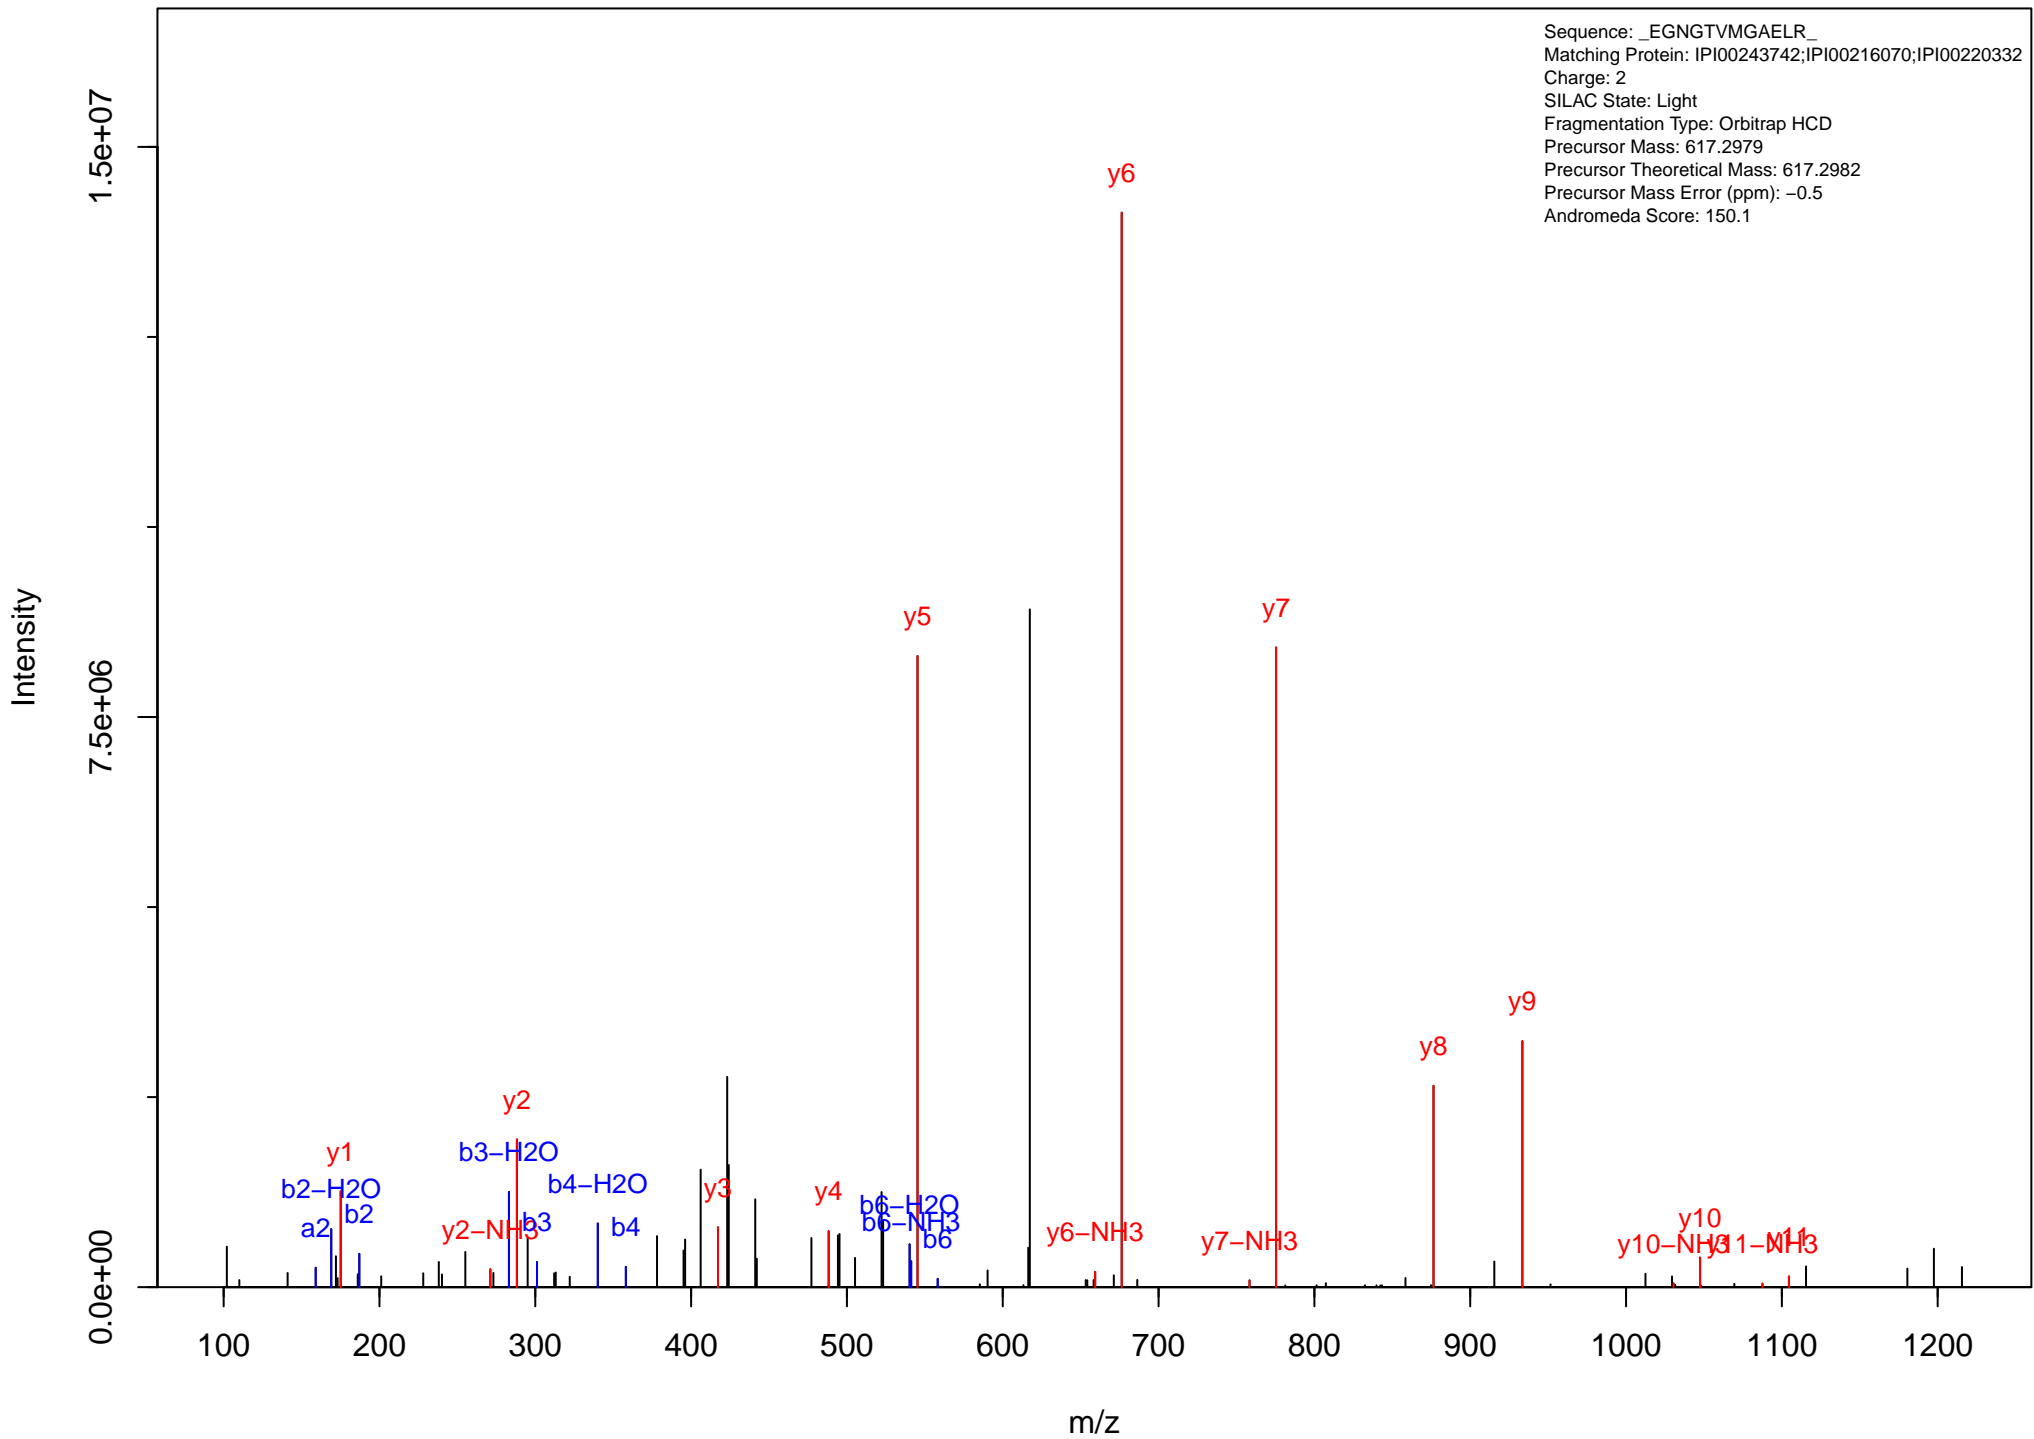

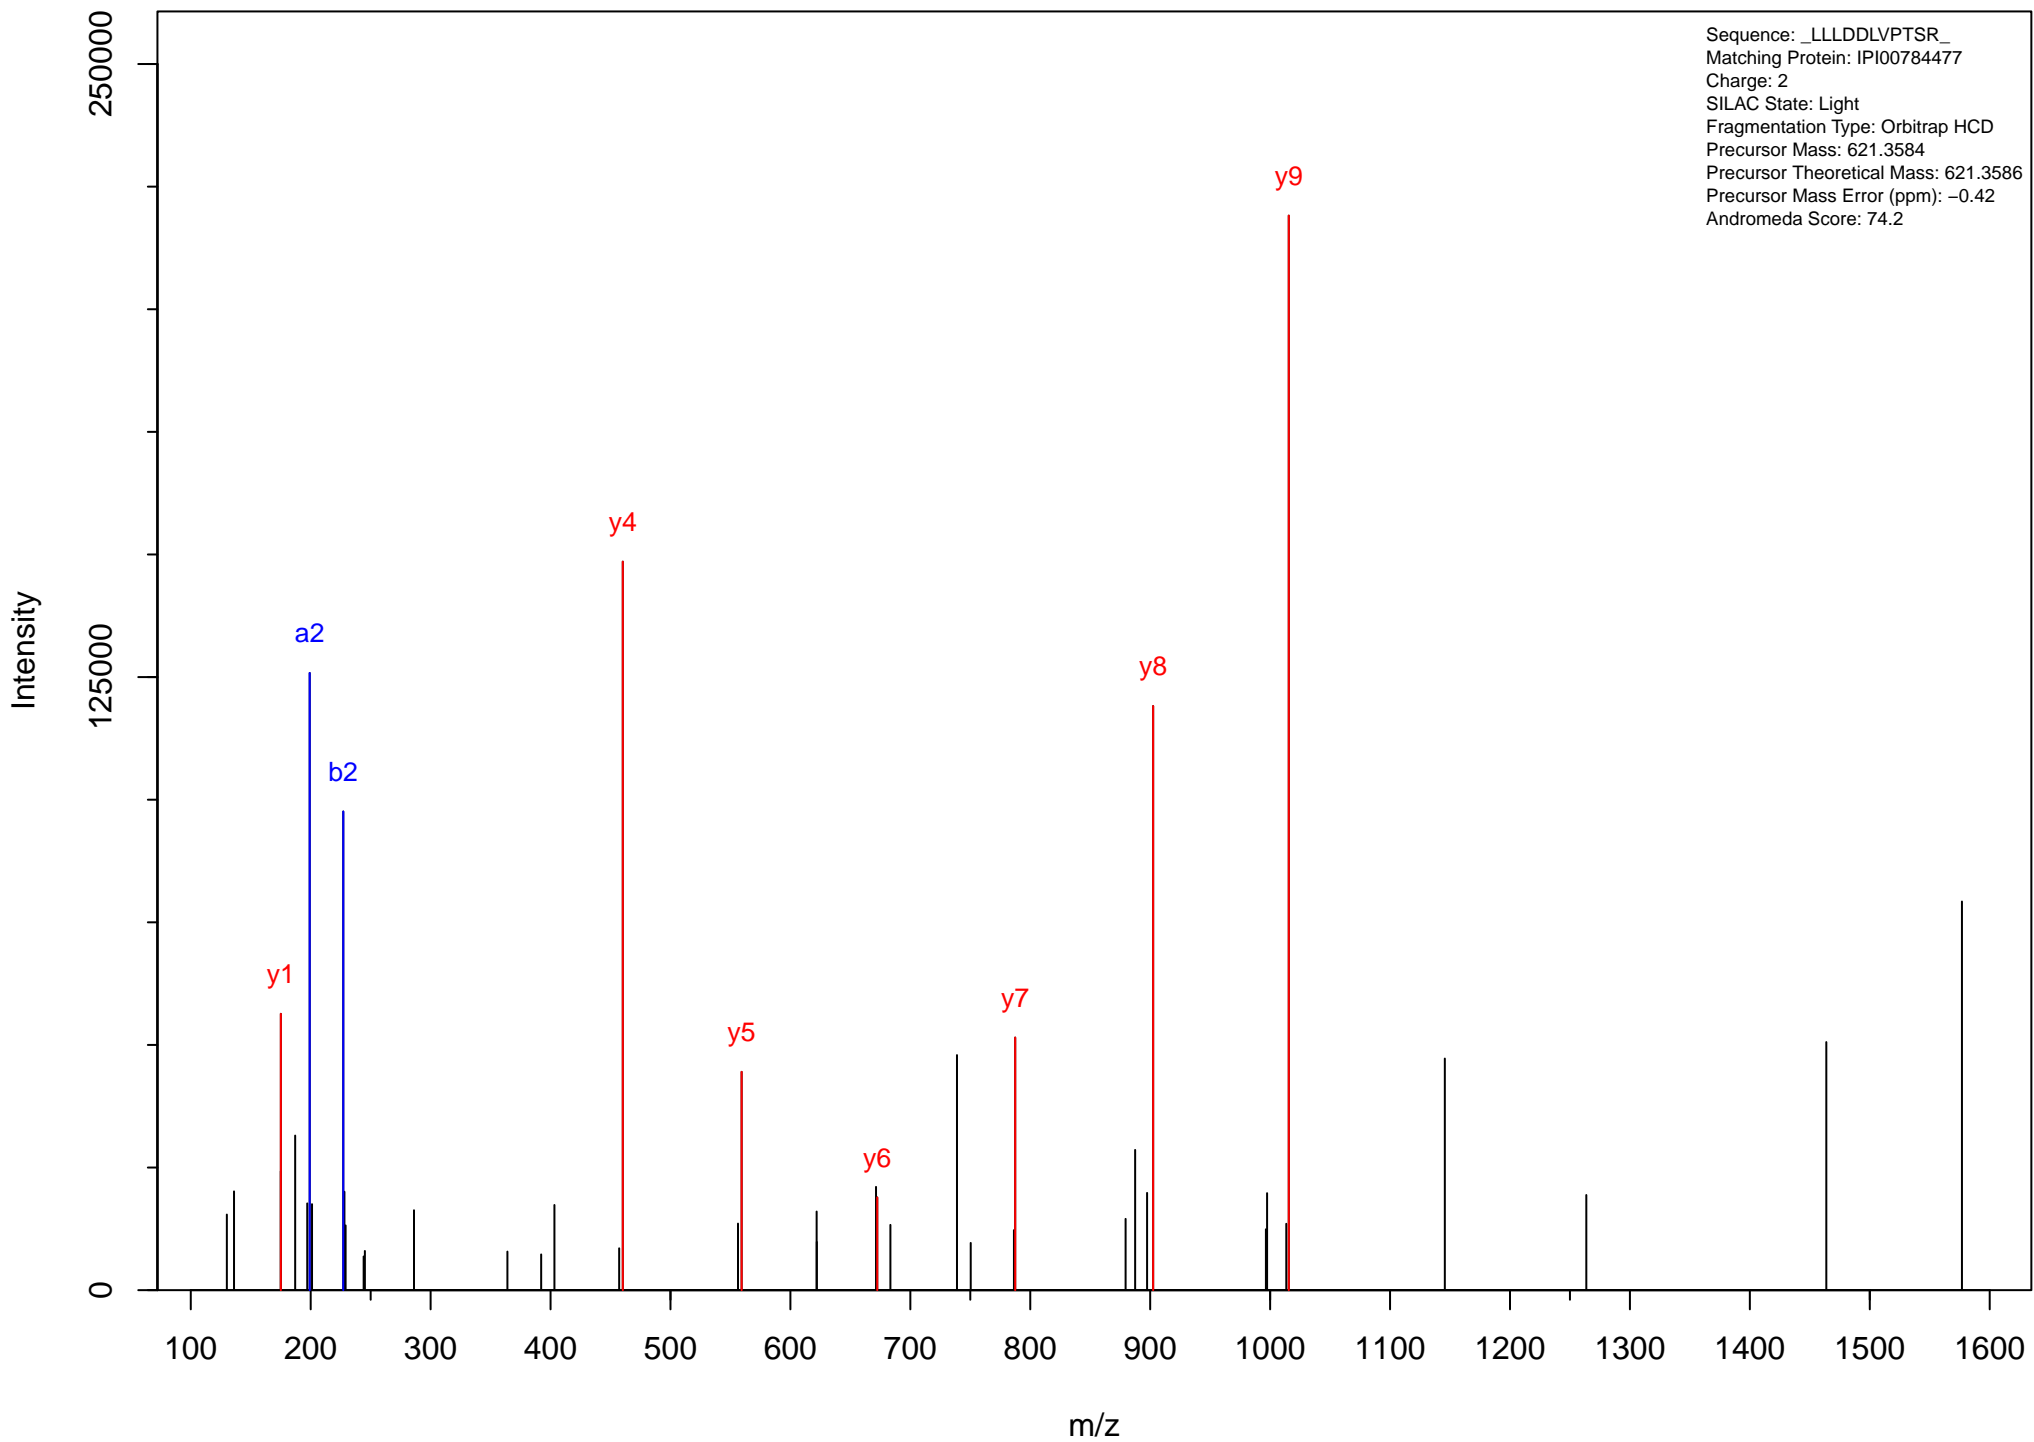

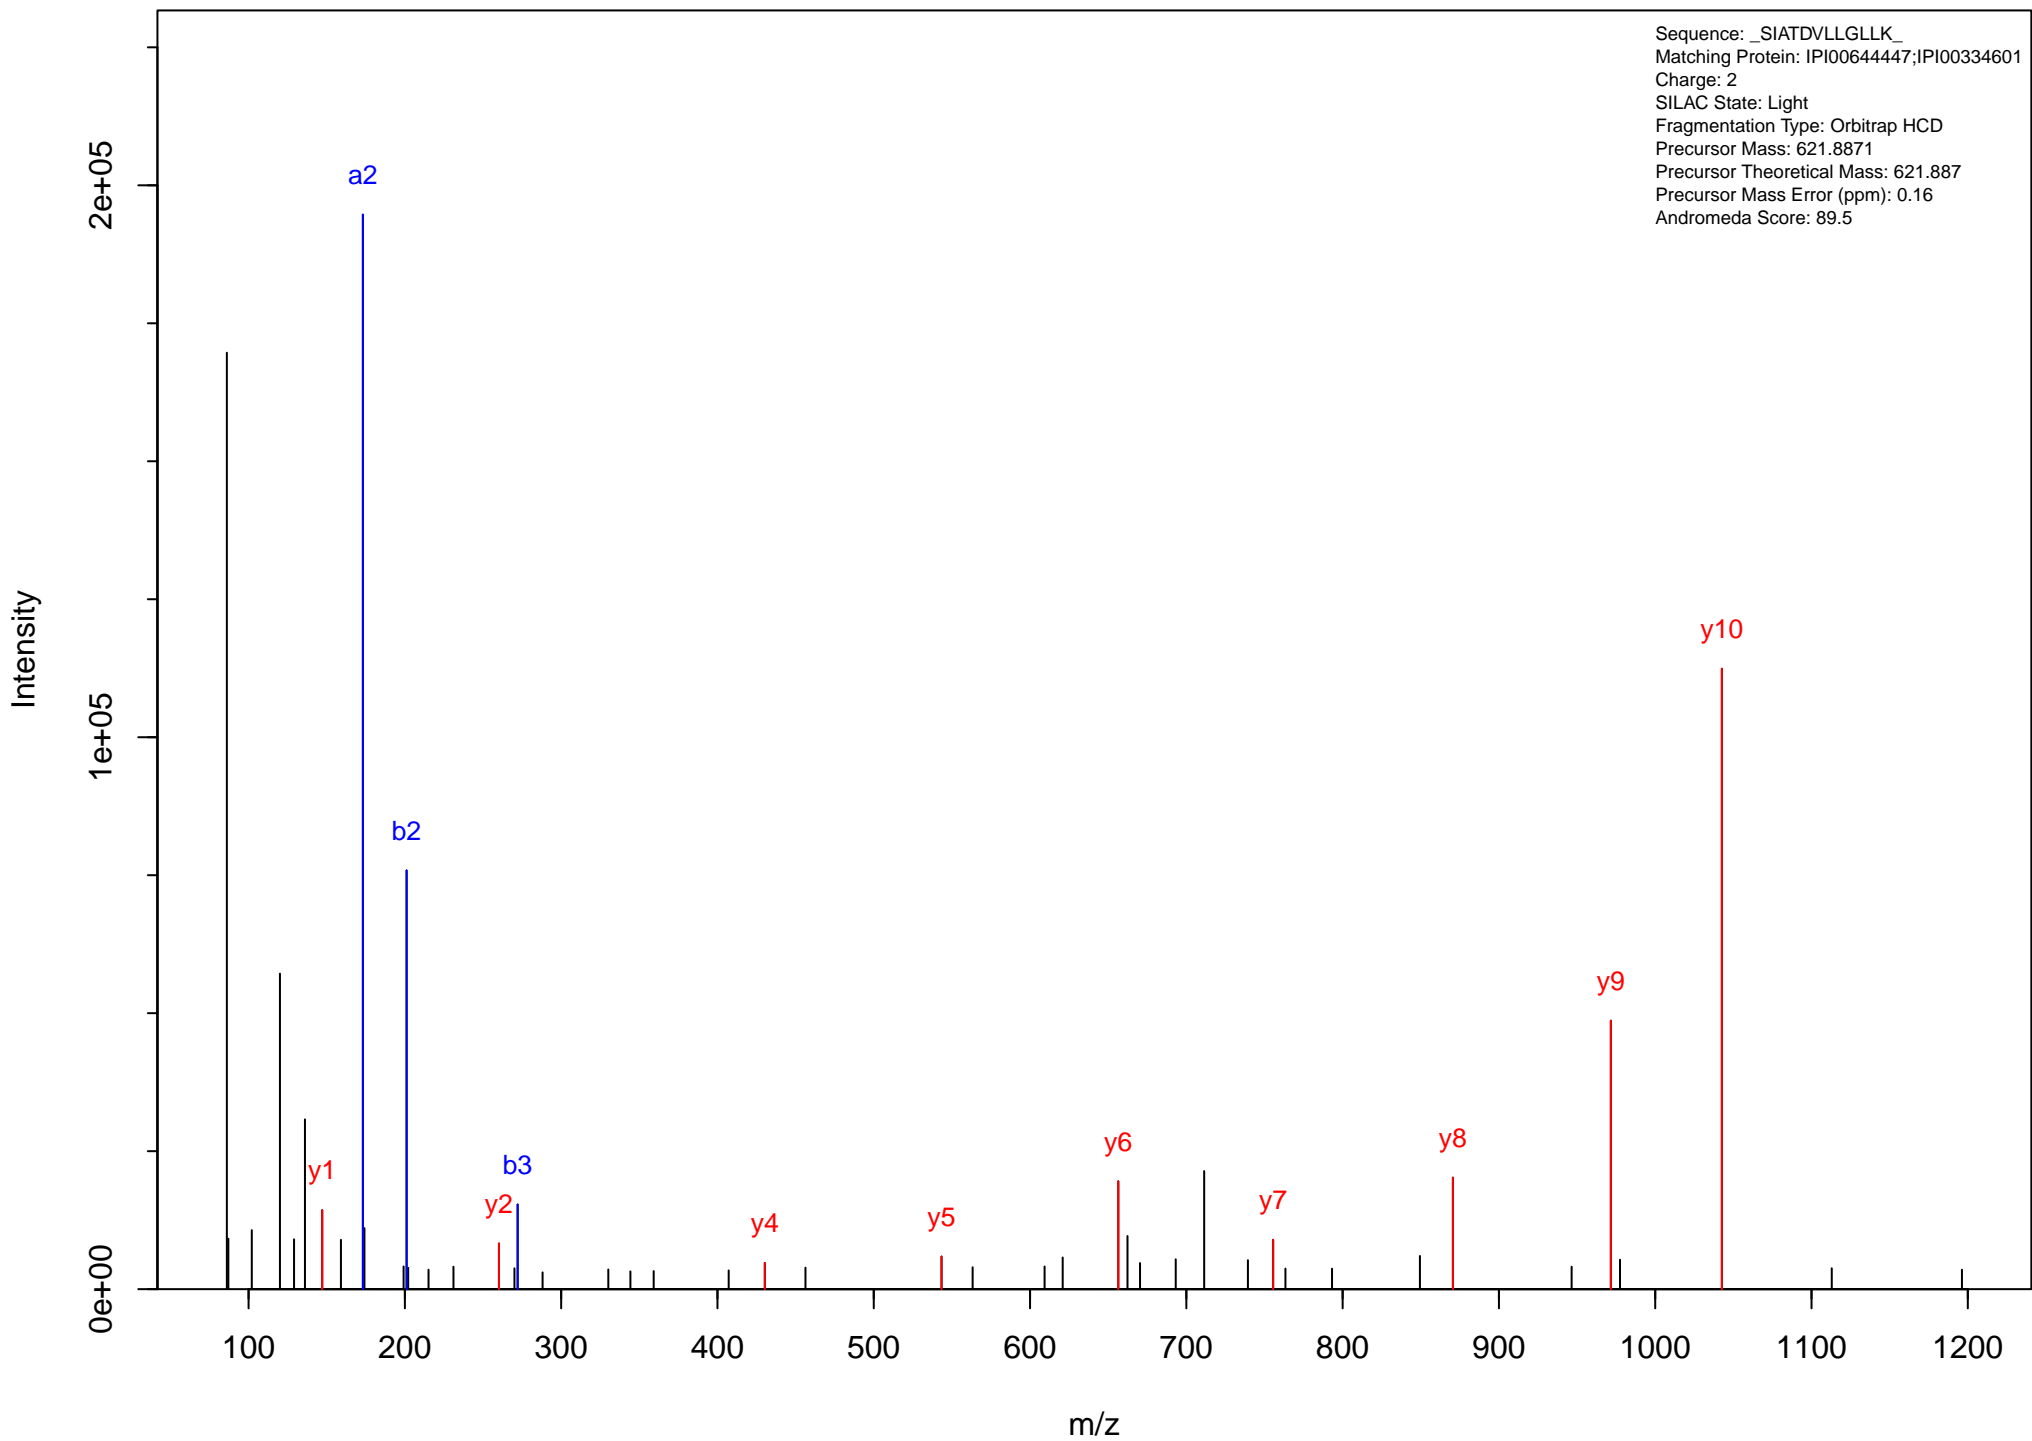

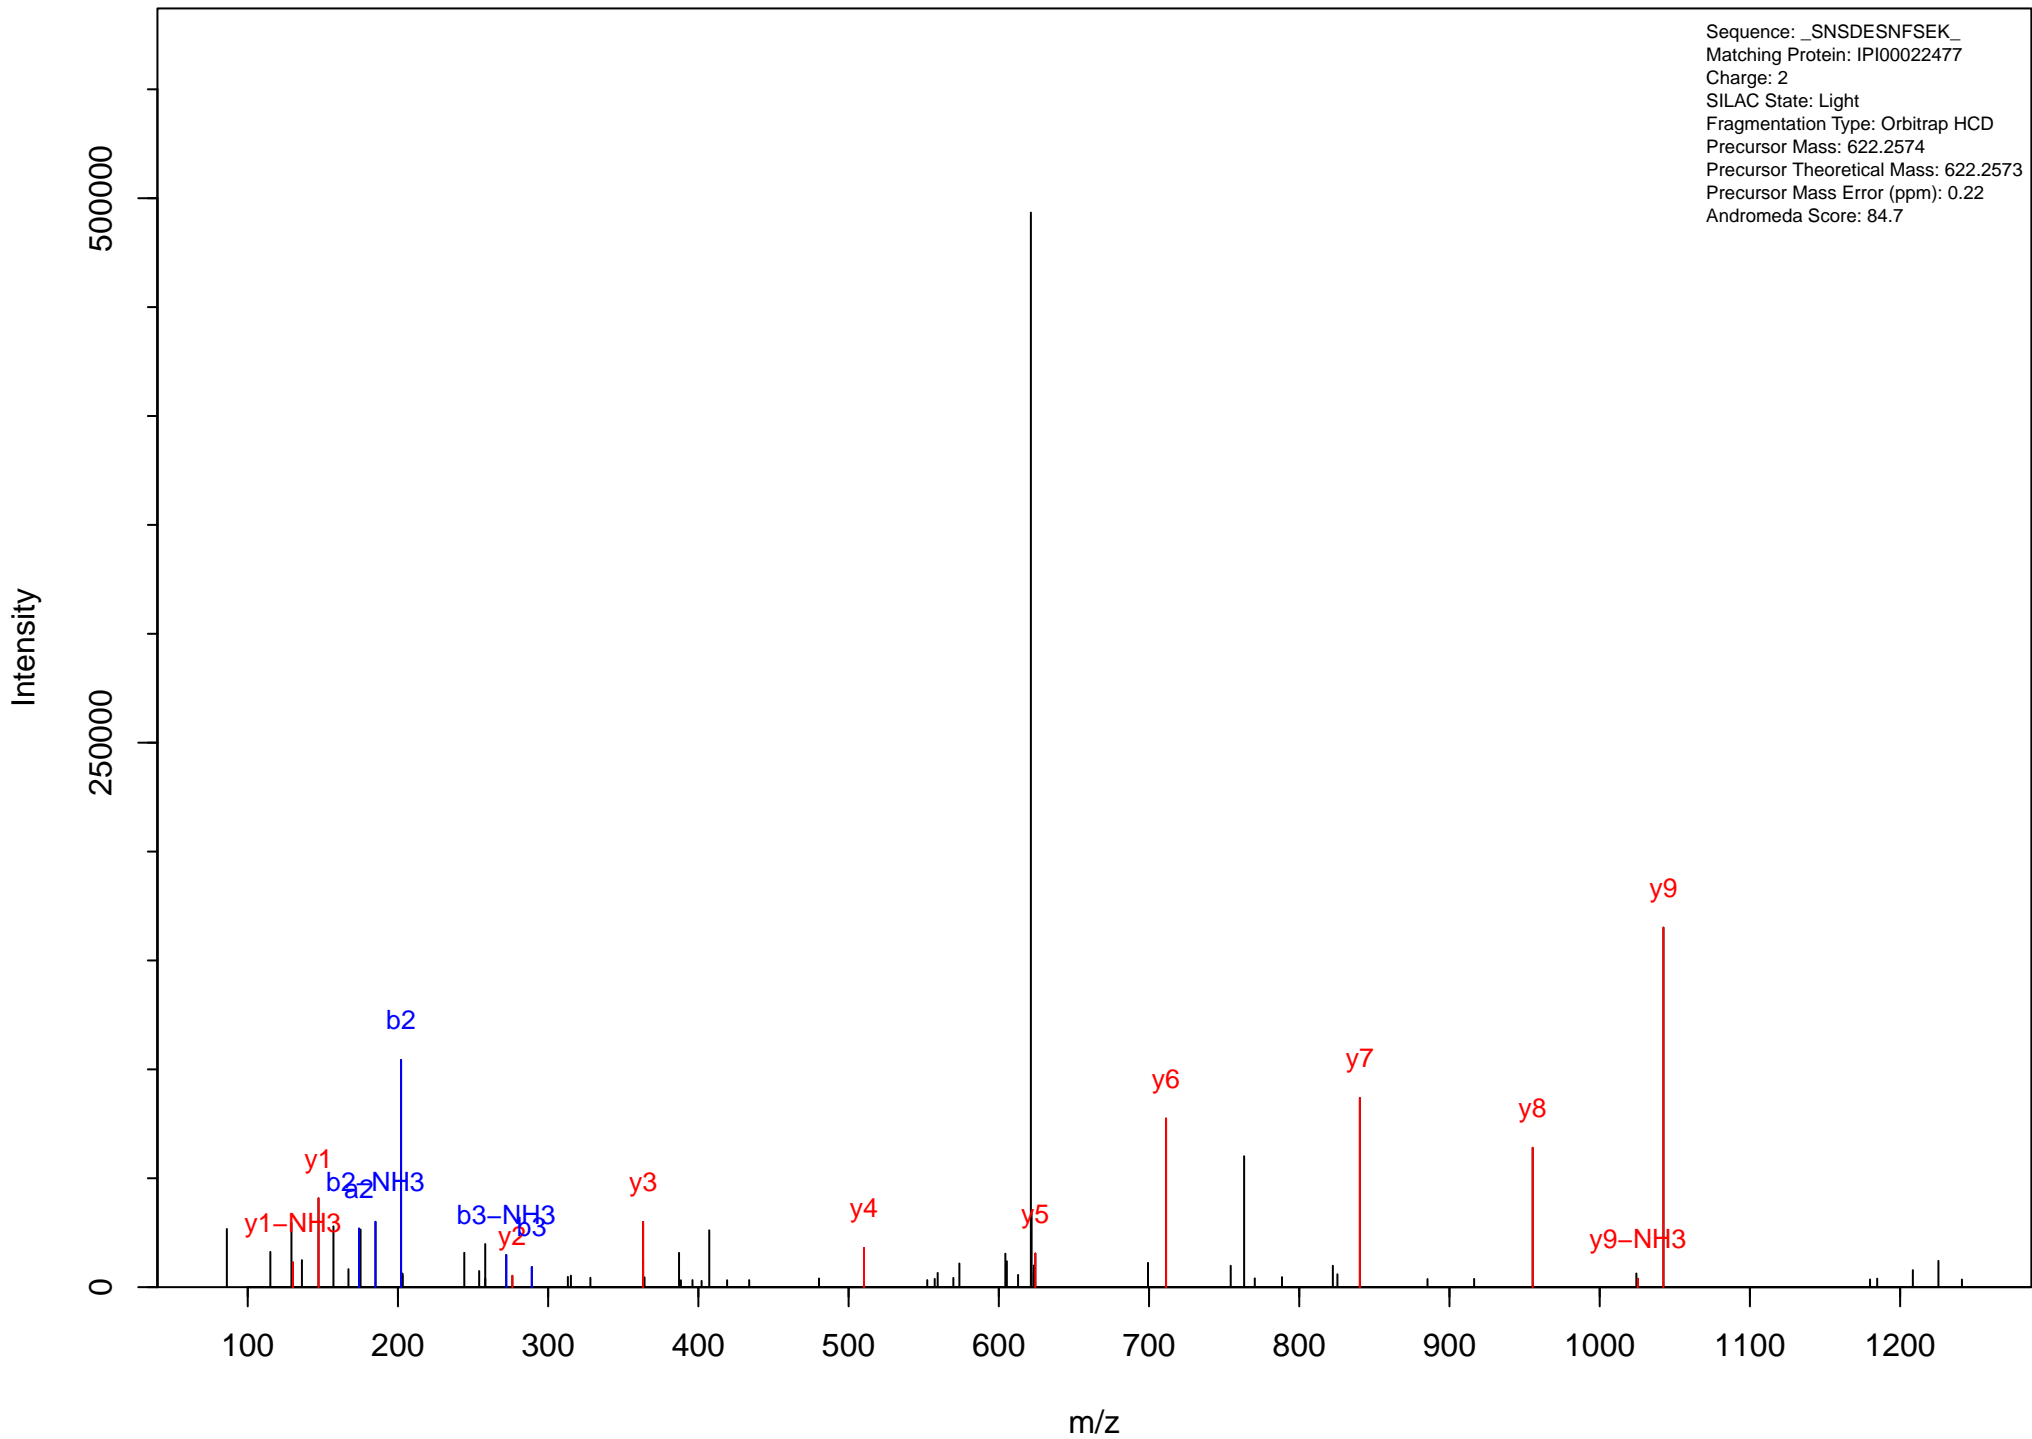

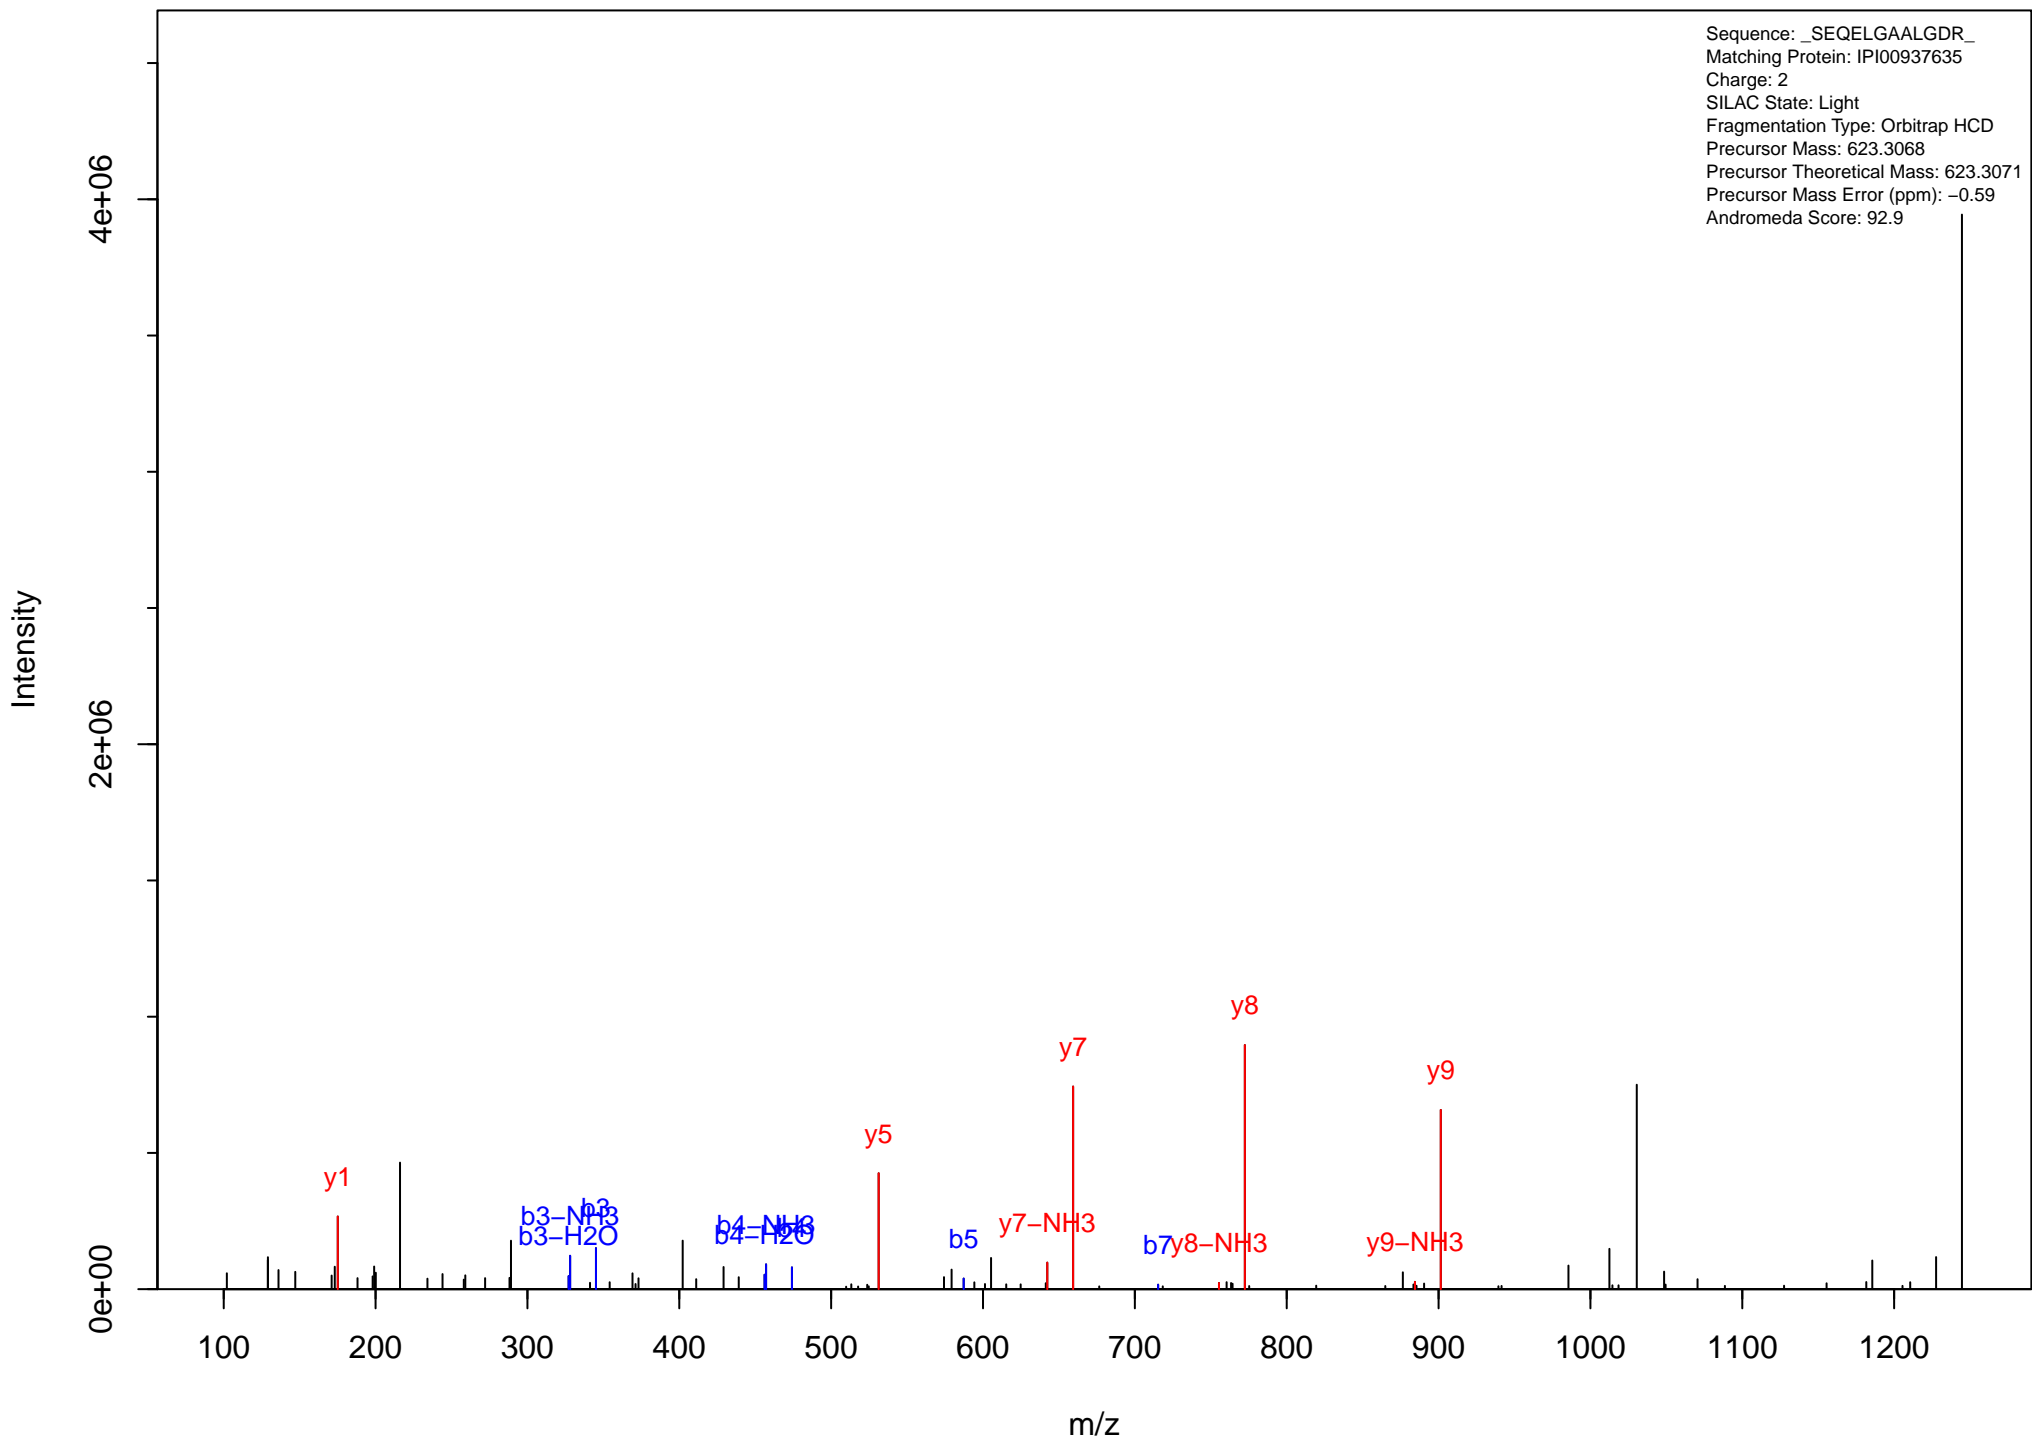

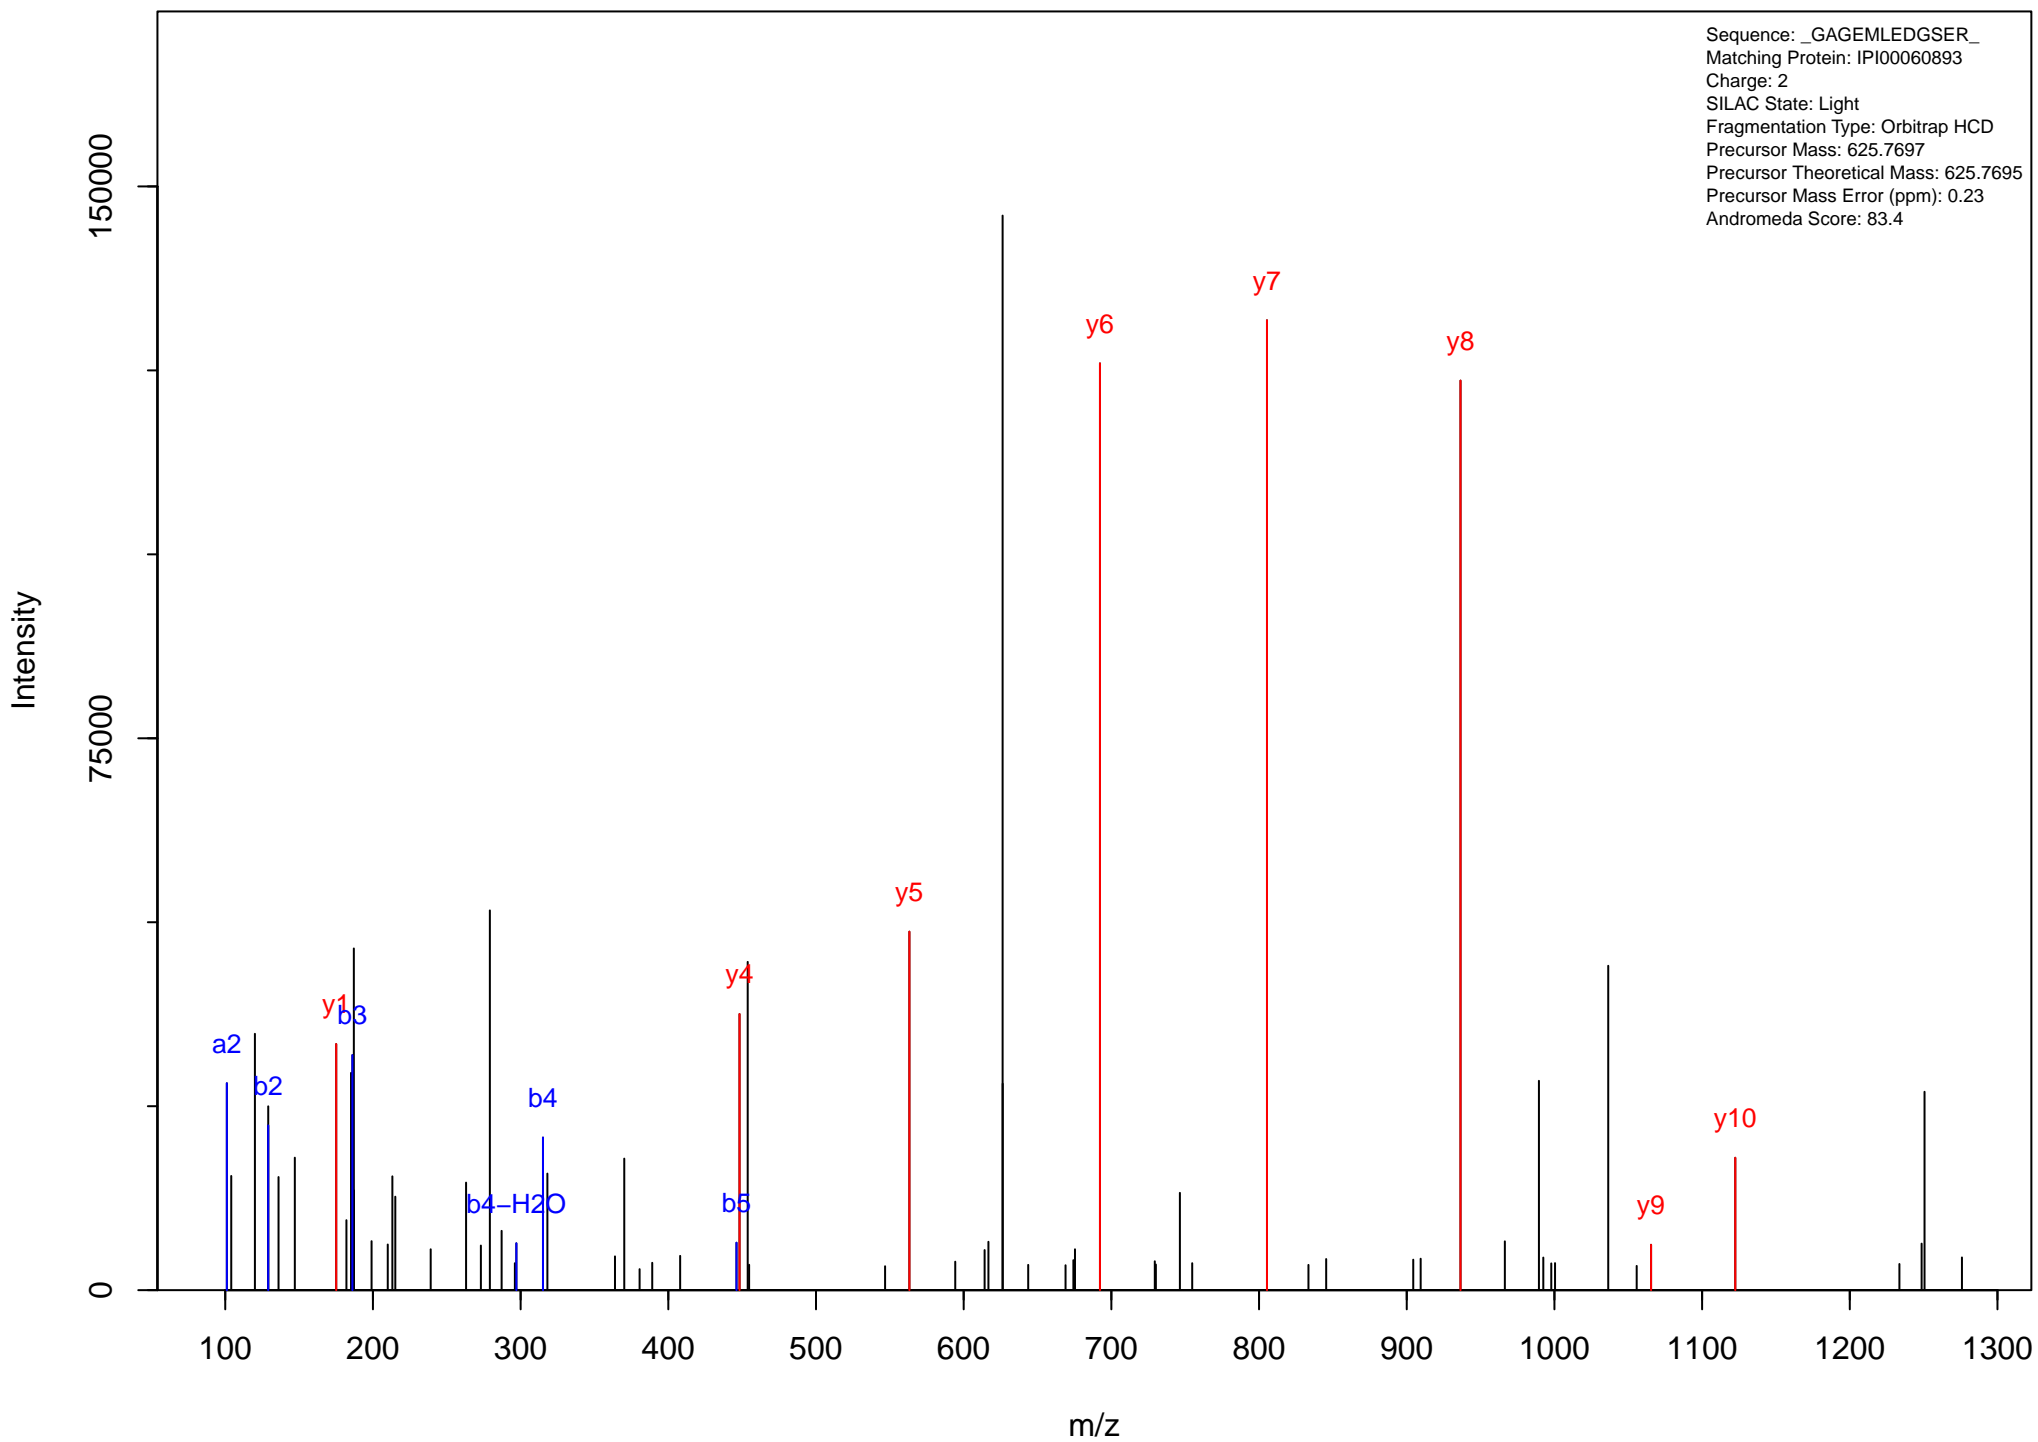

Intensity

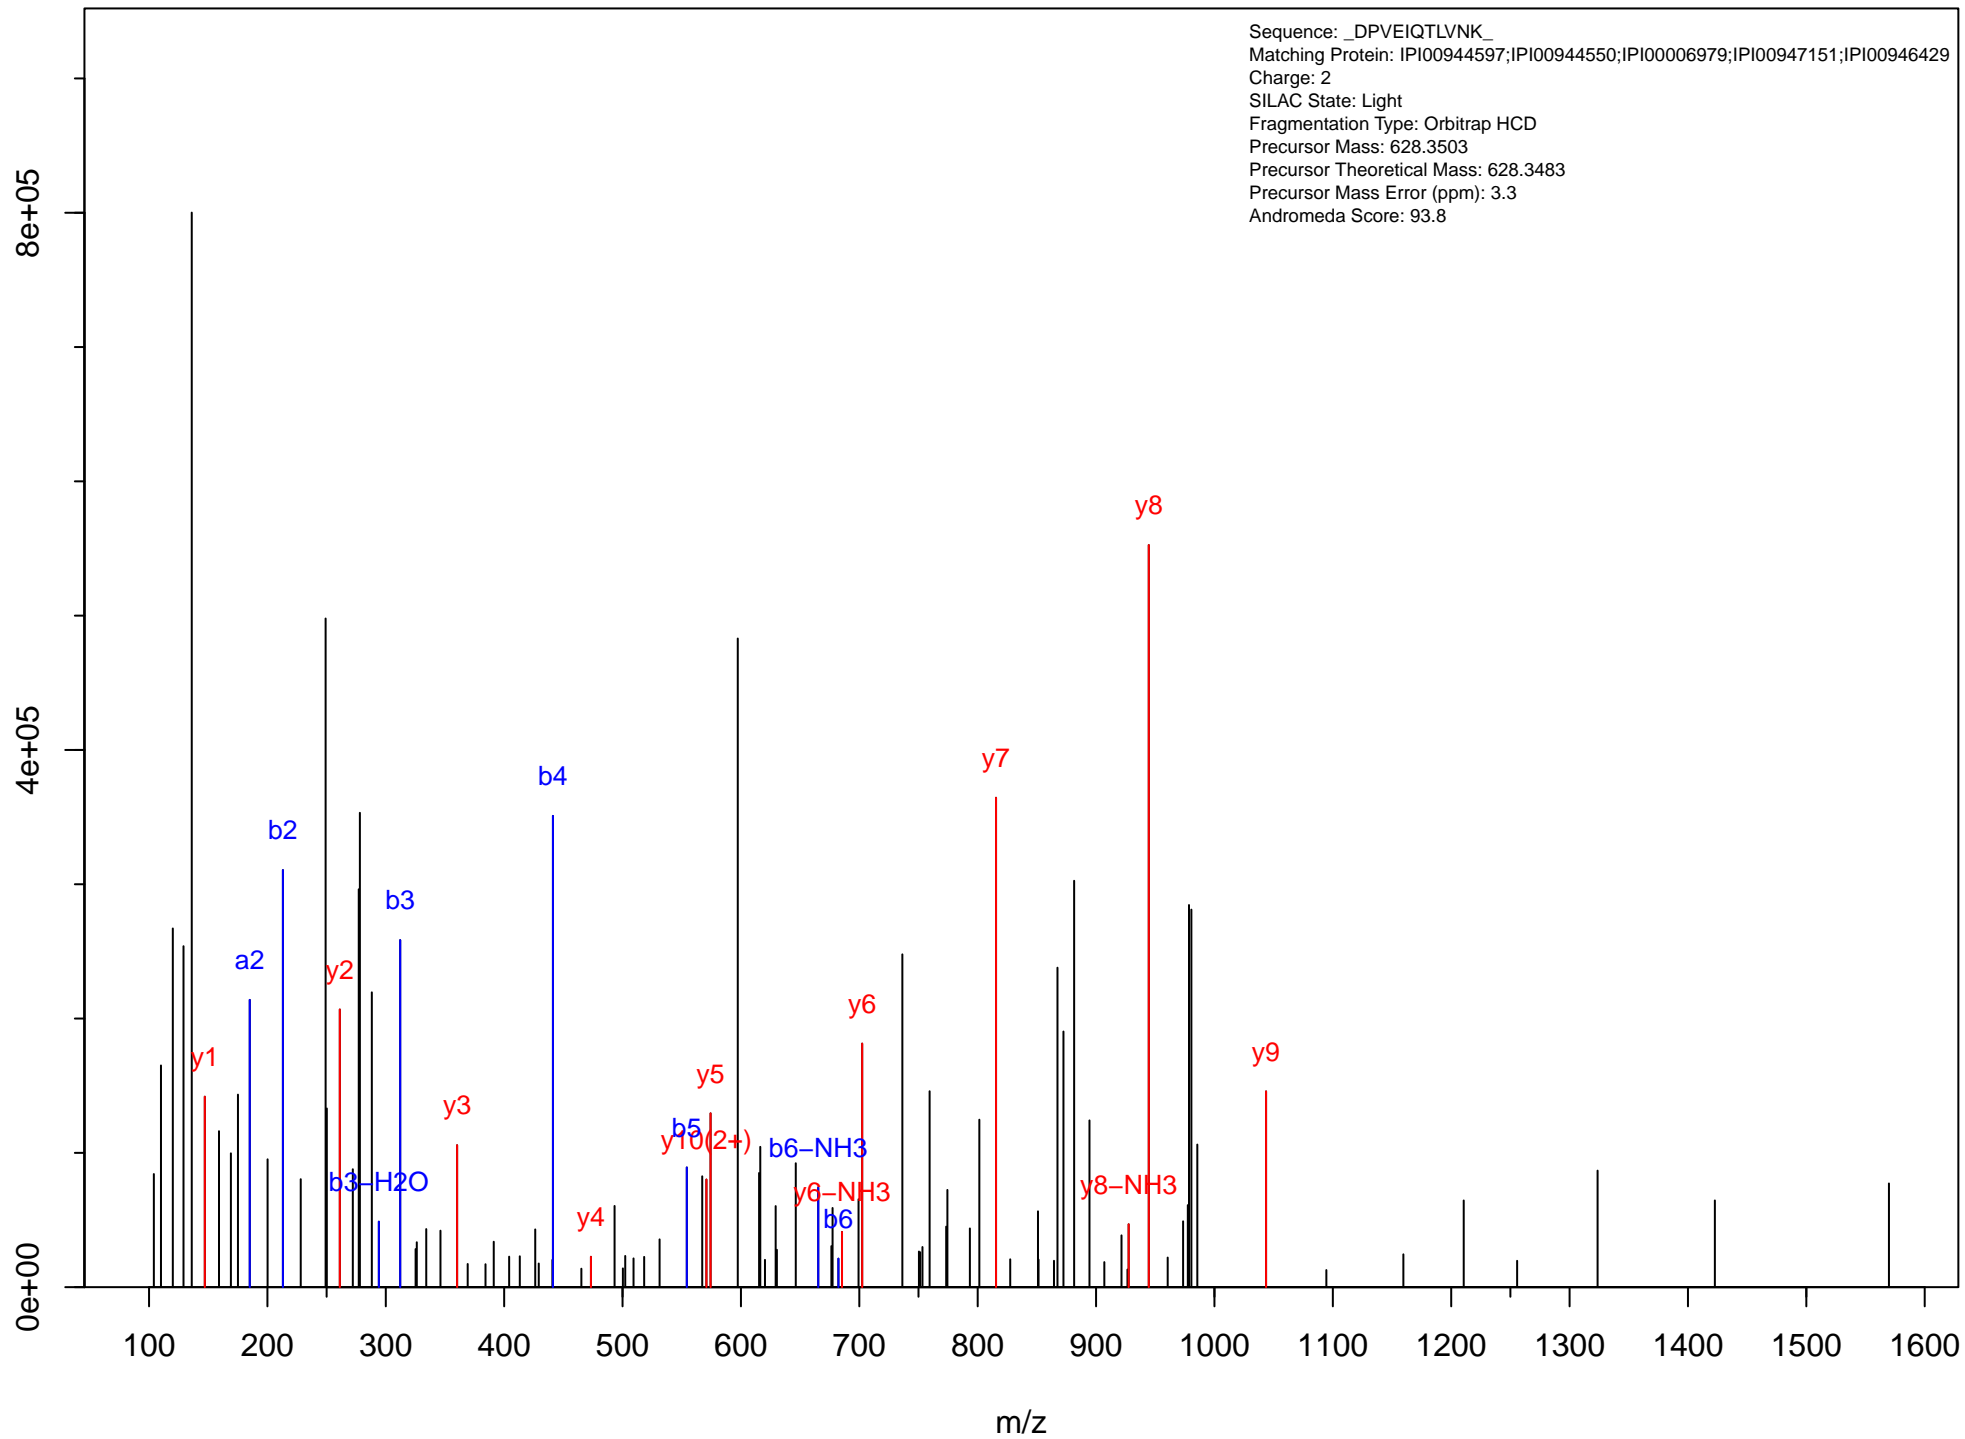

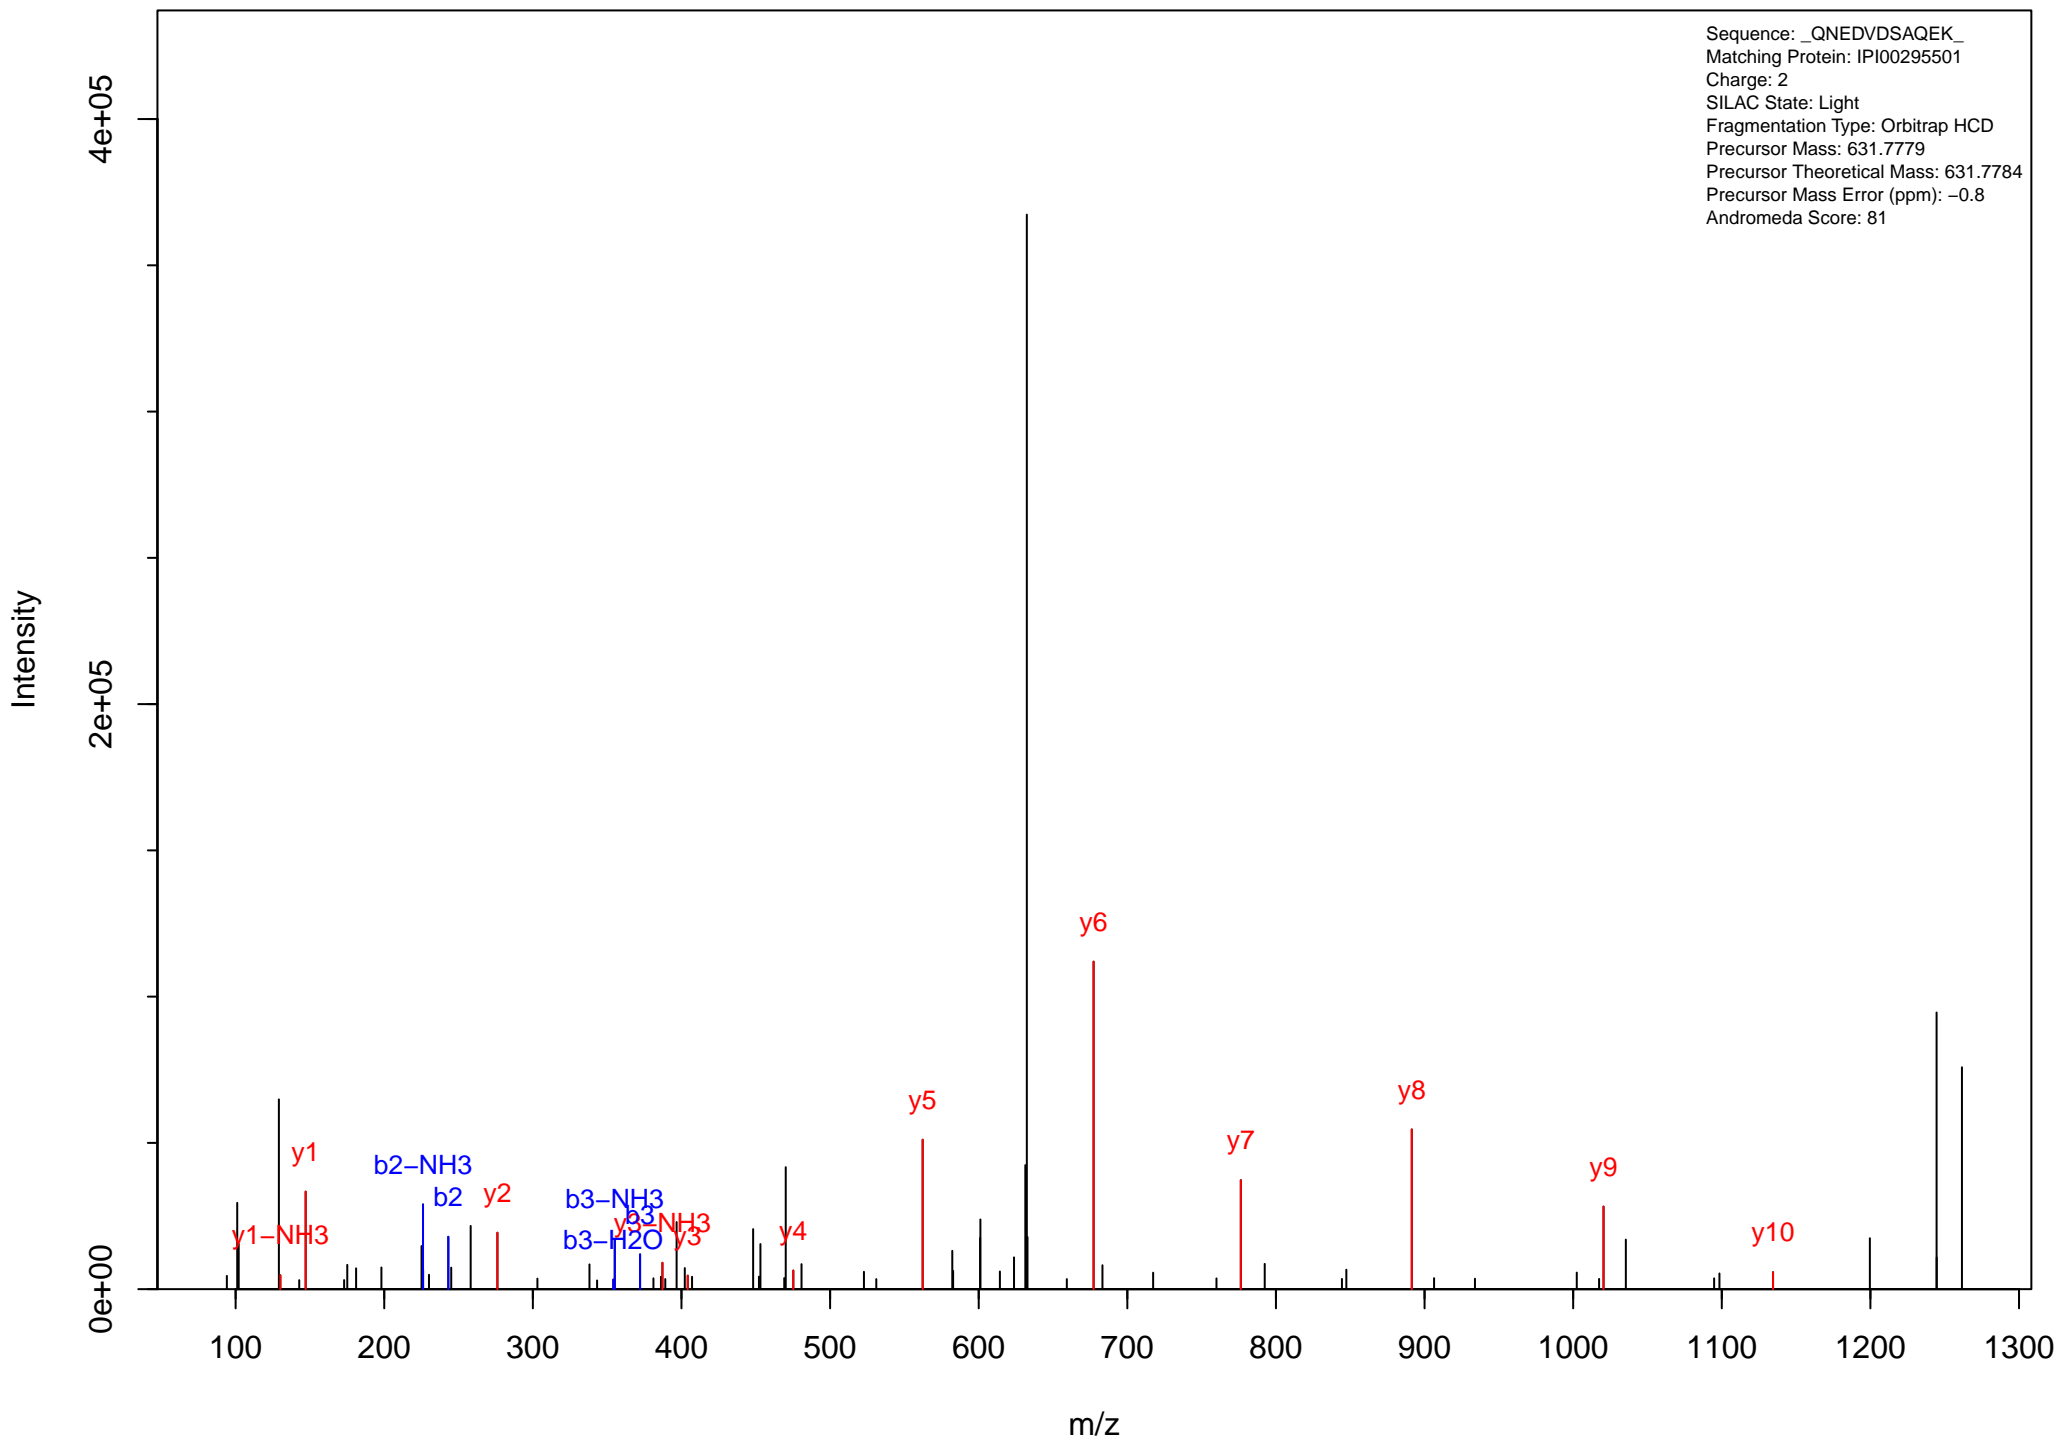

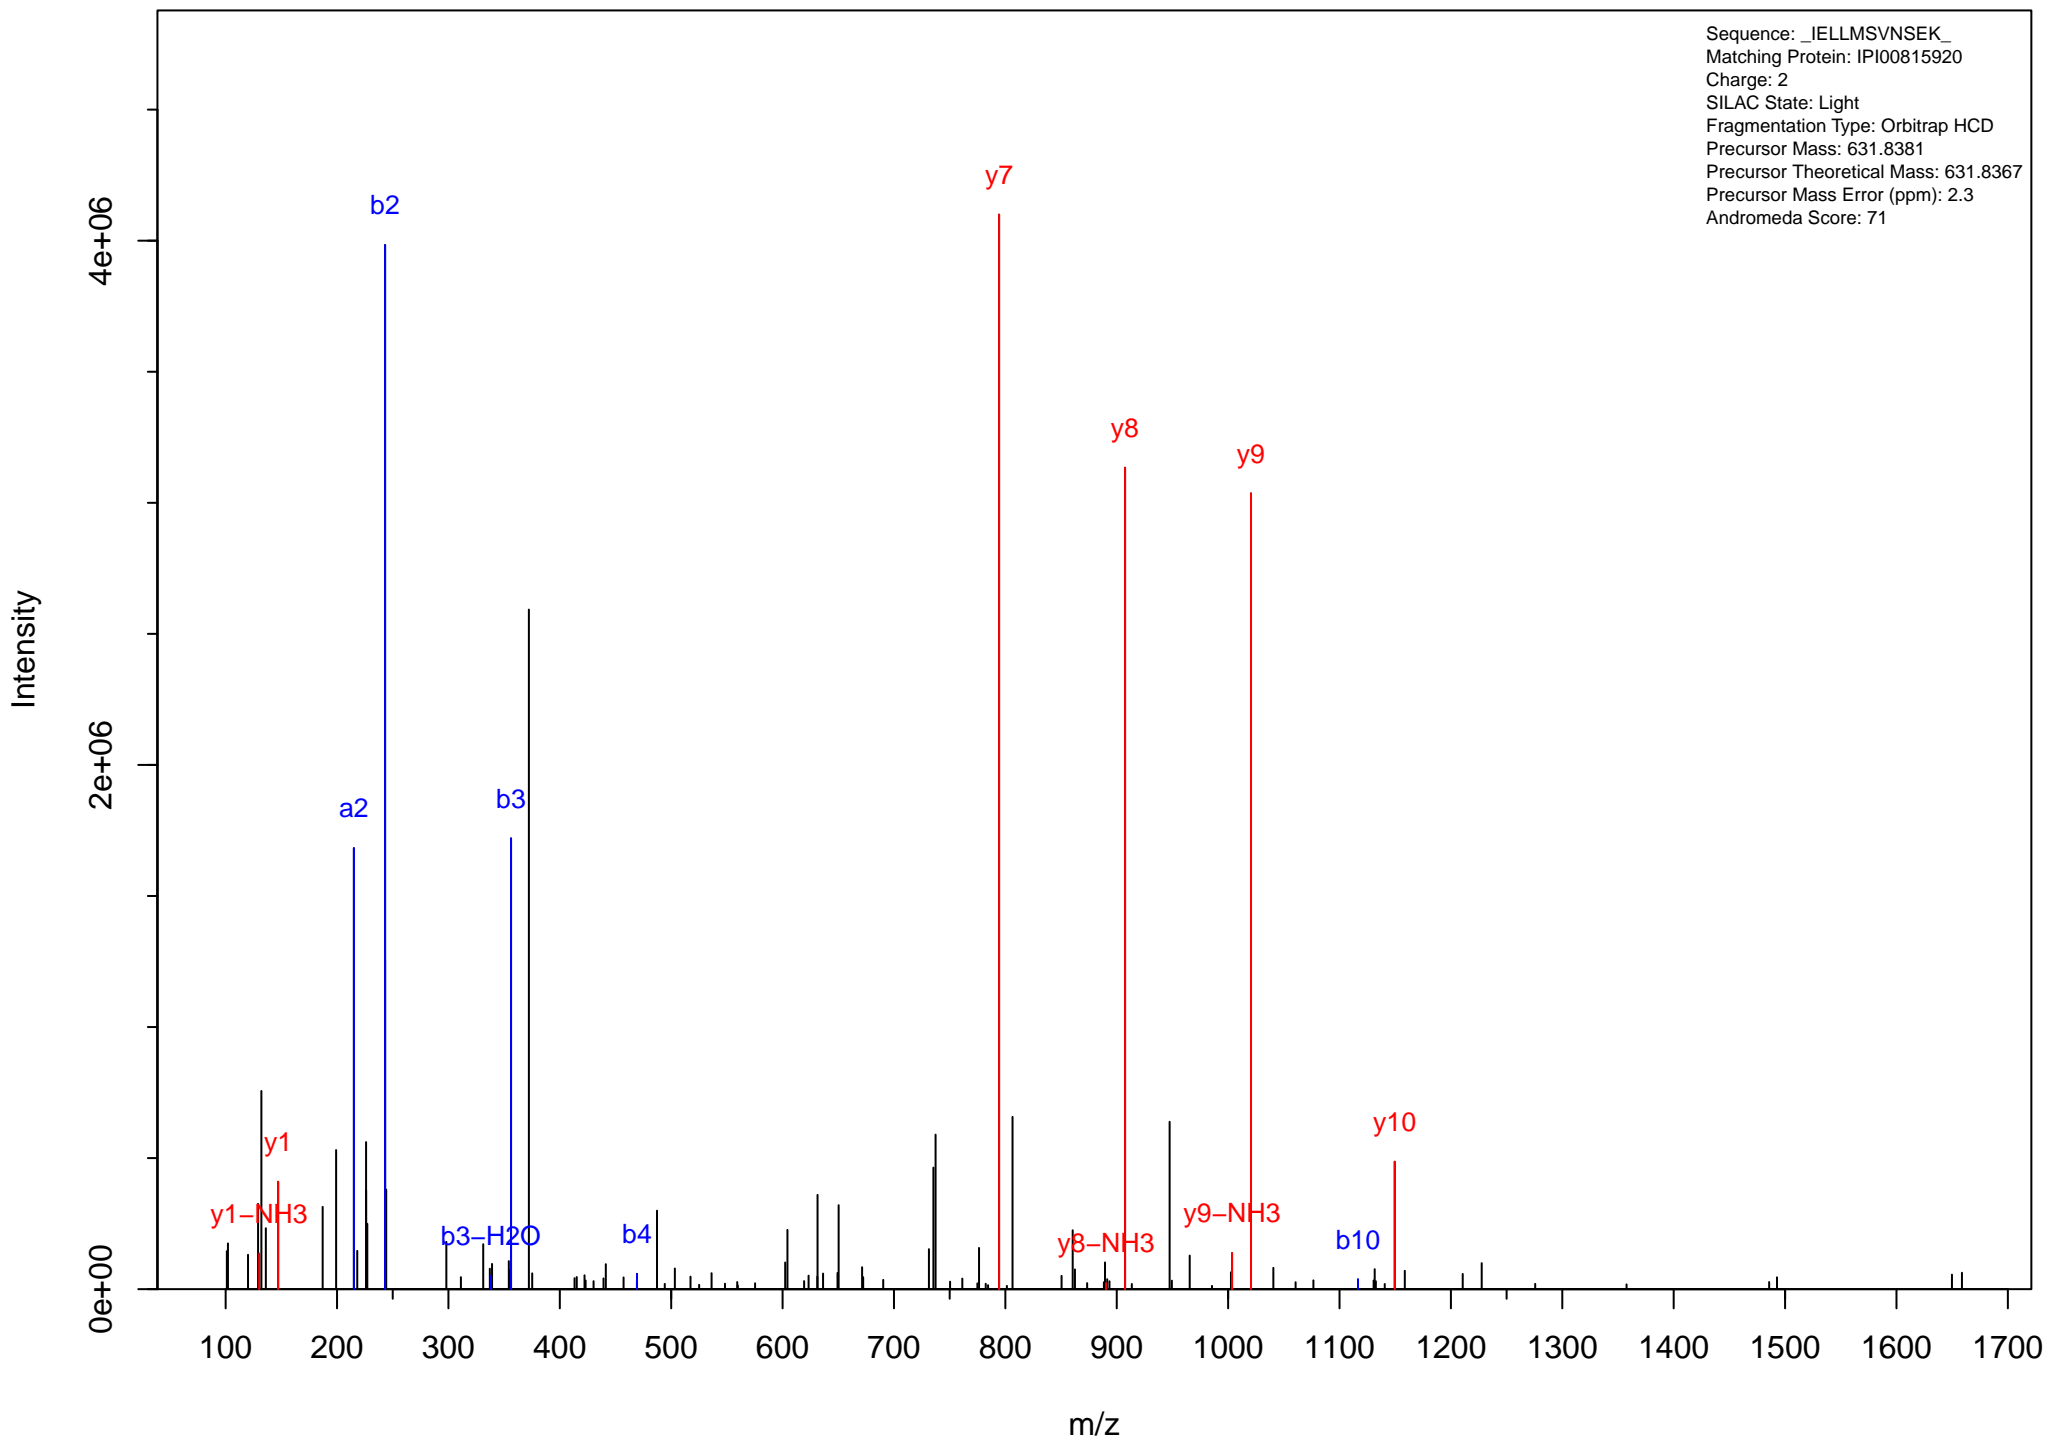

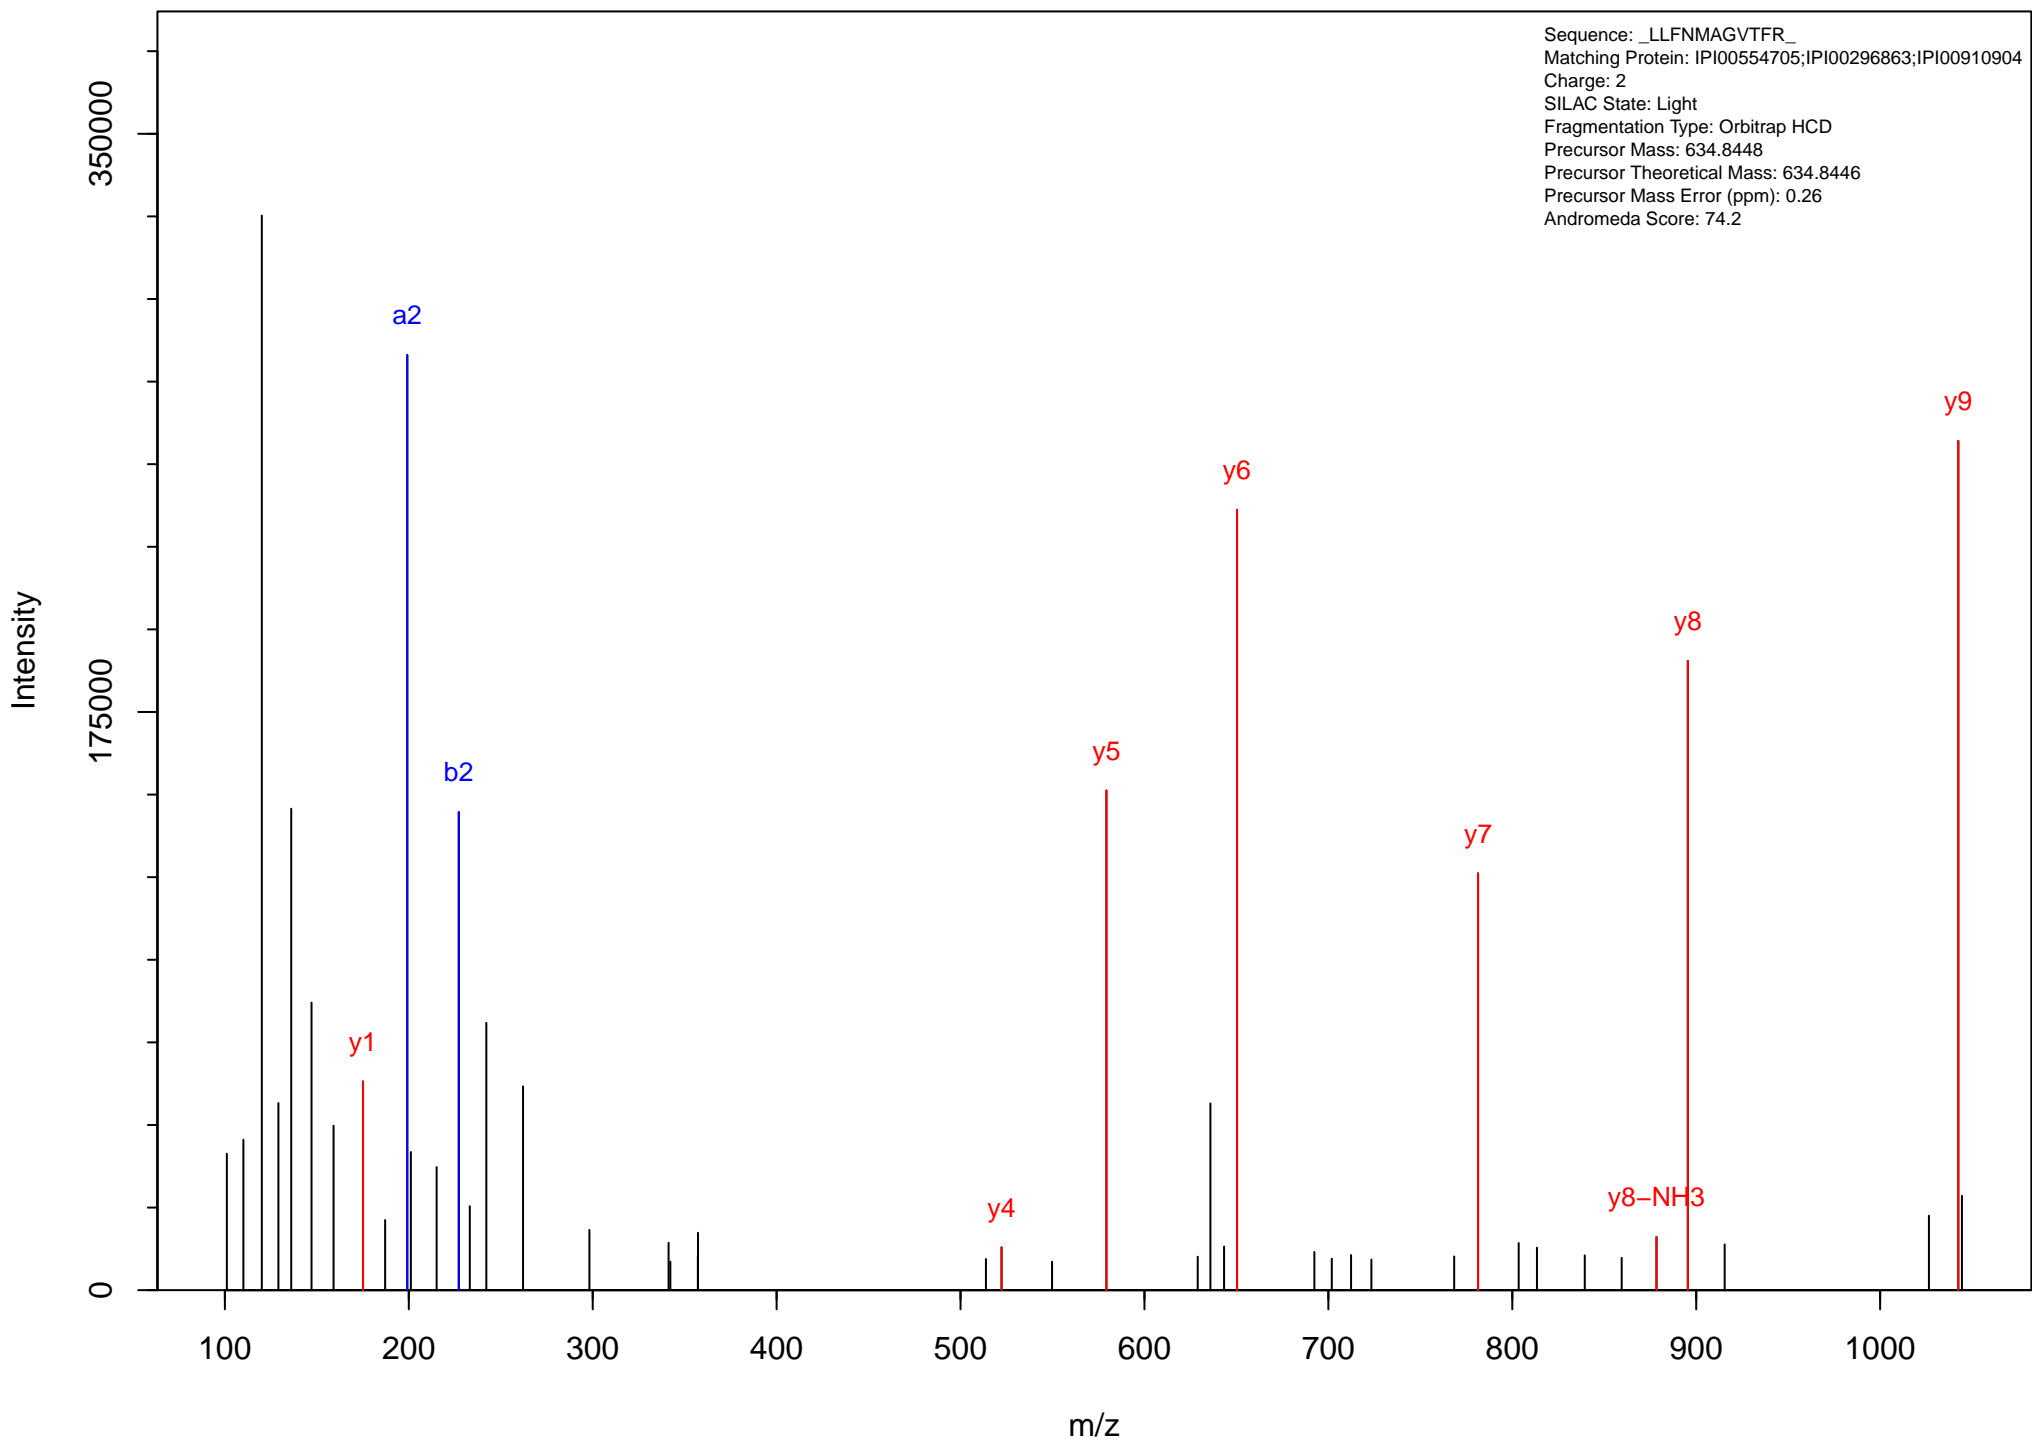

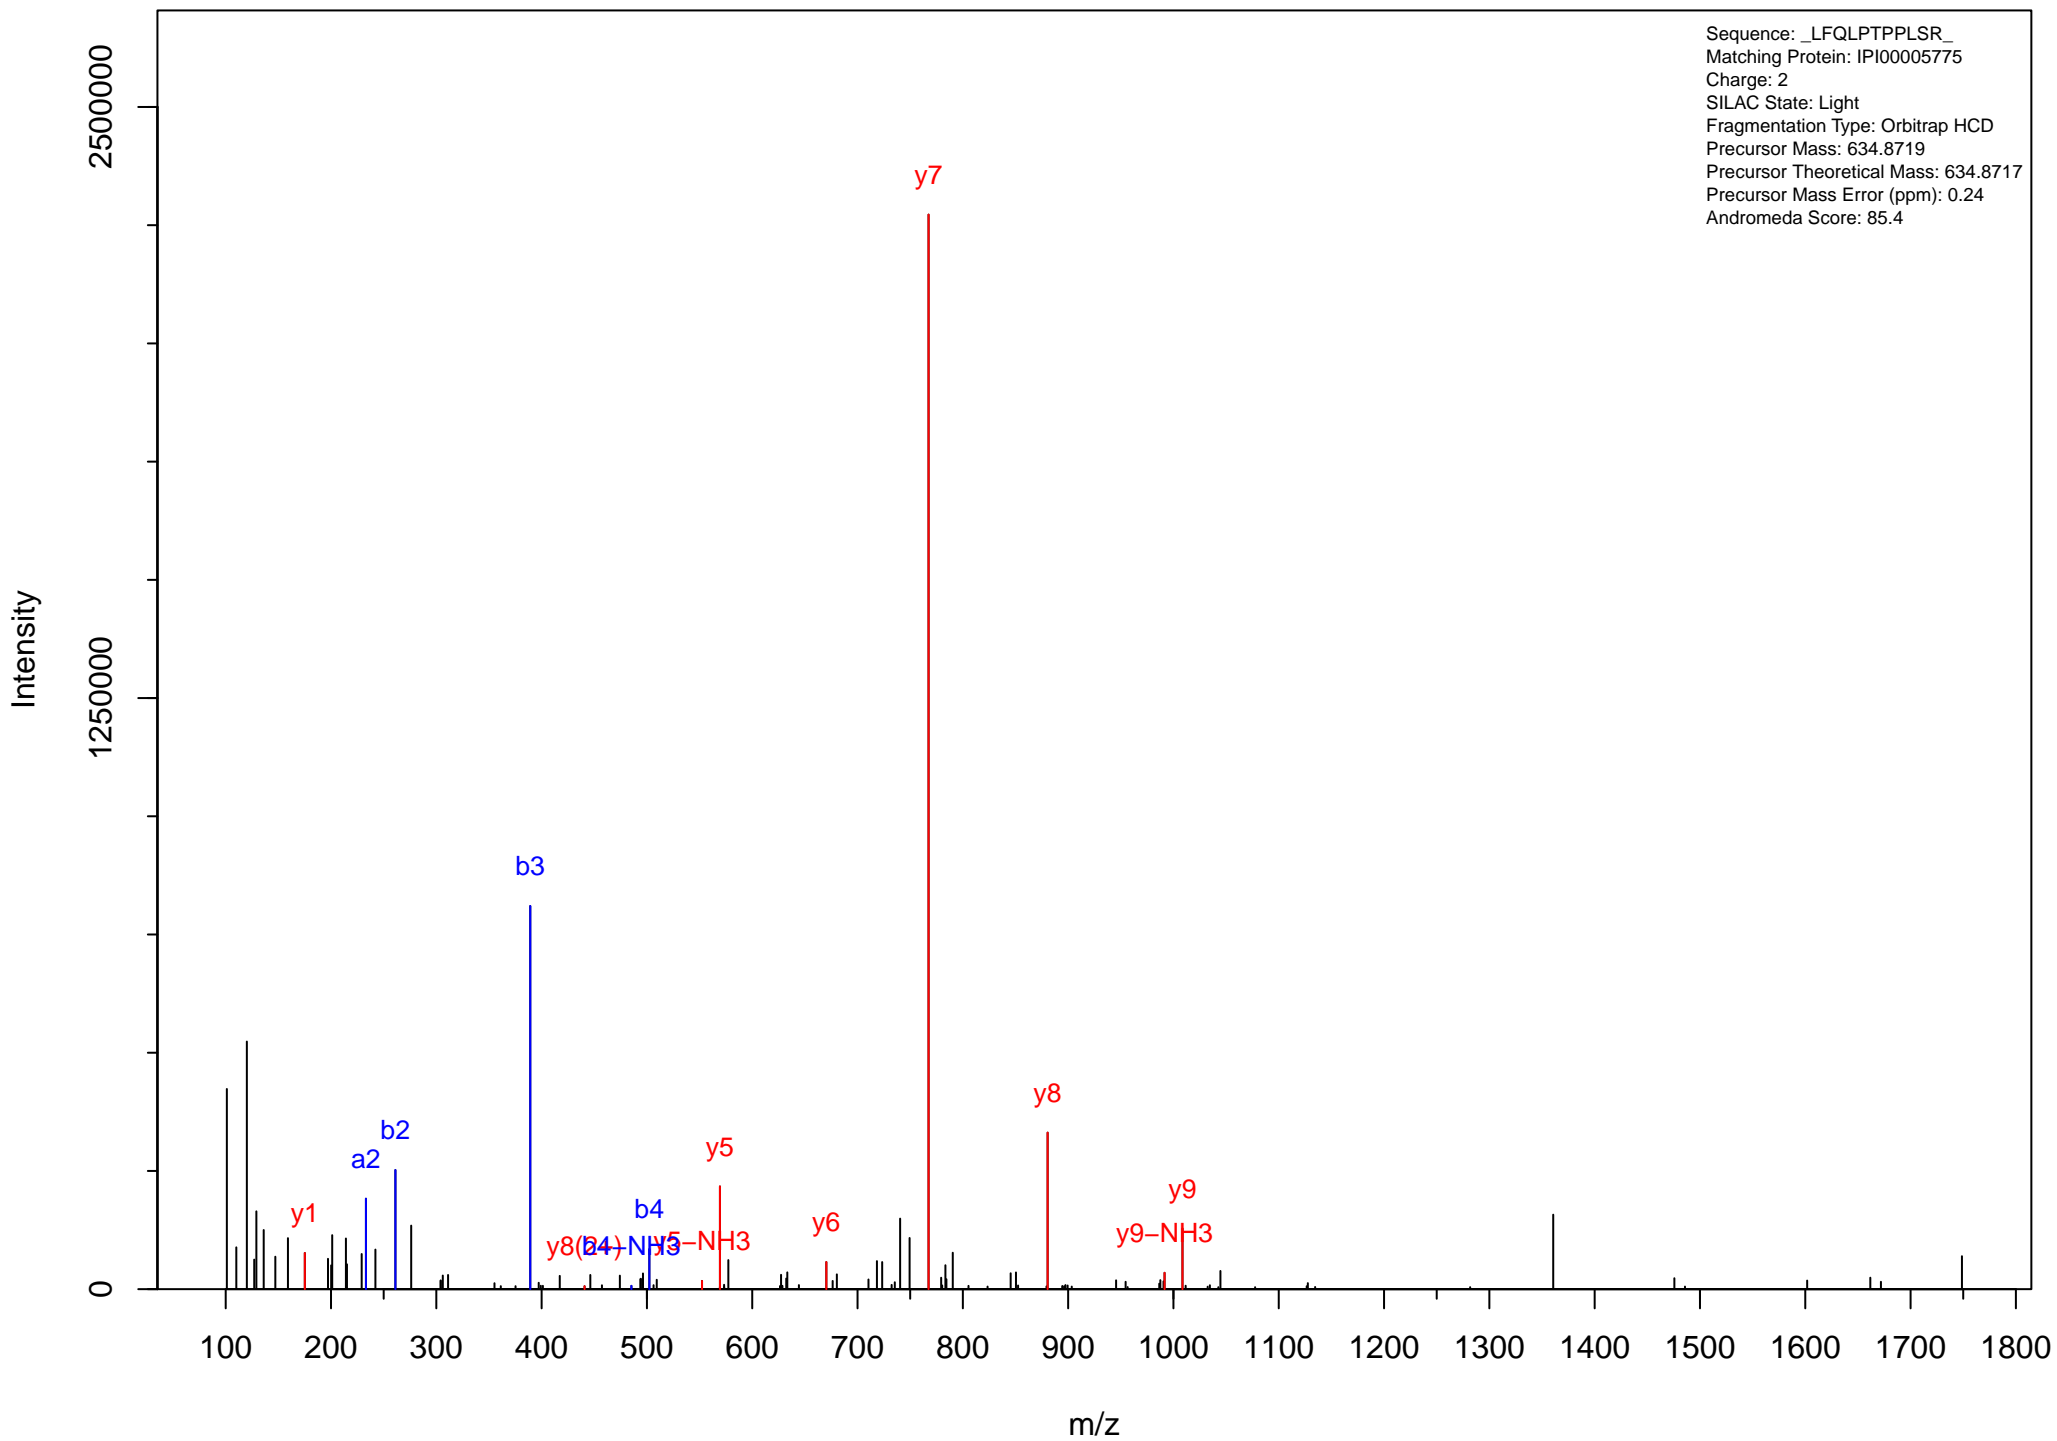

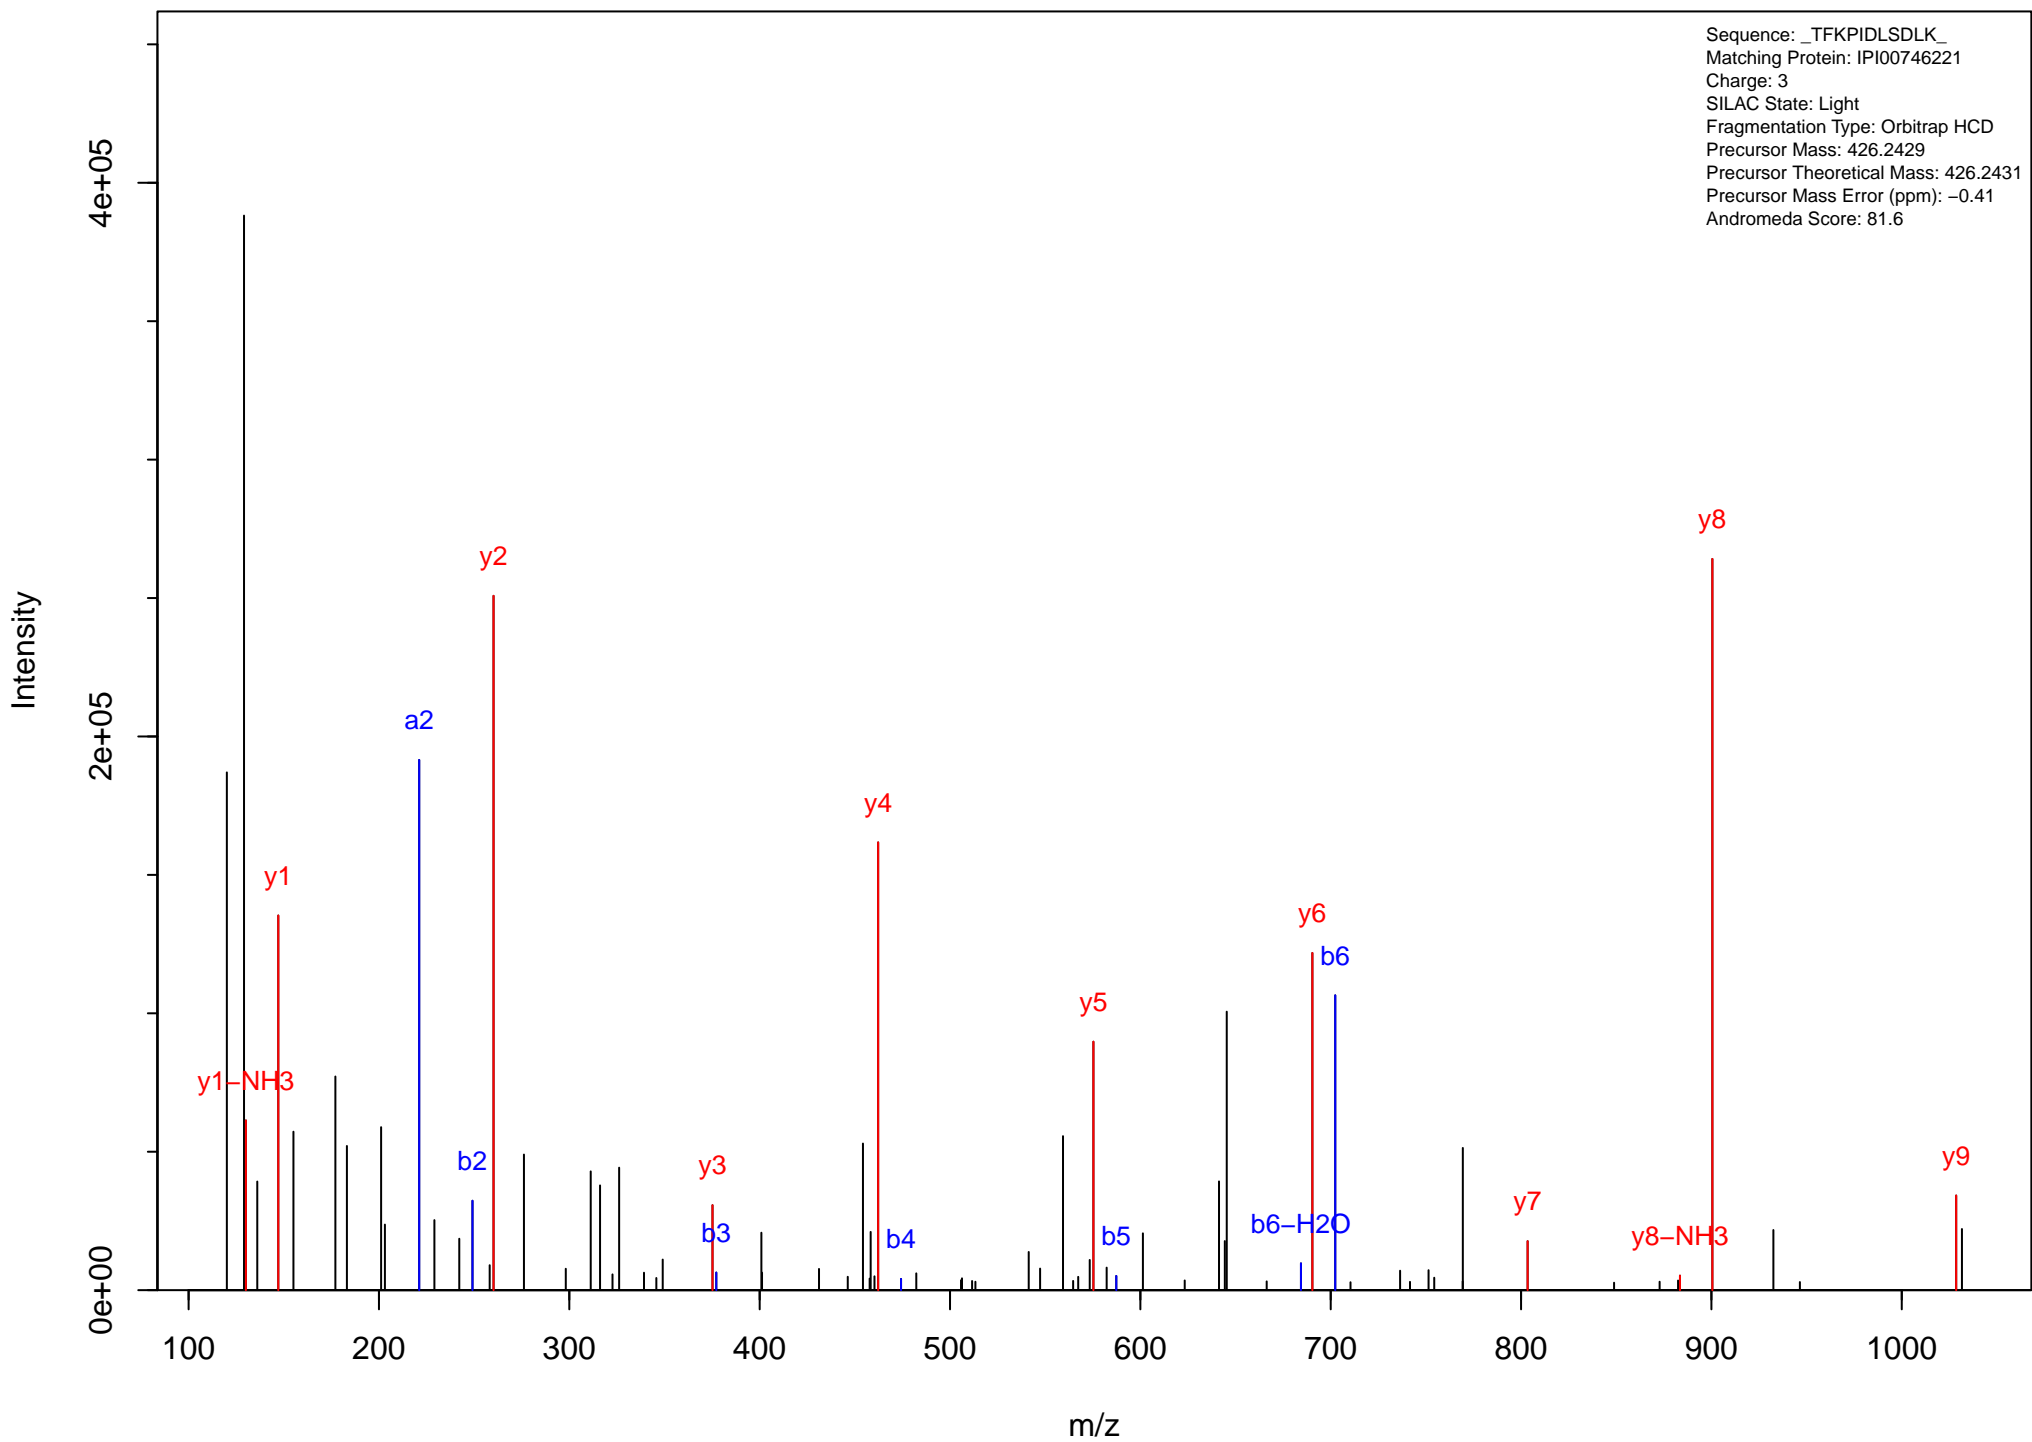

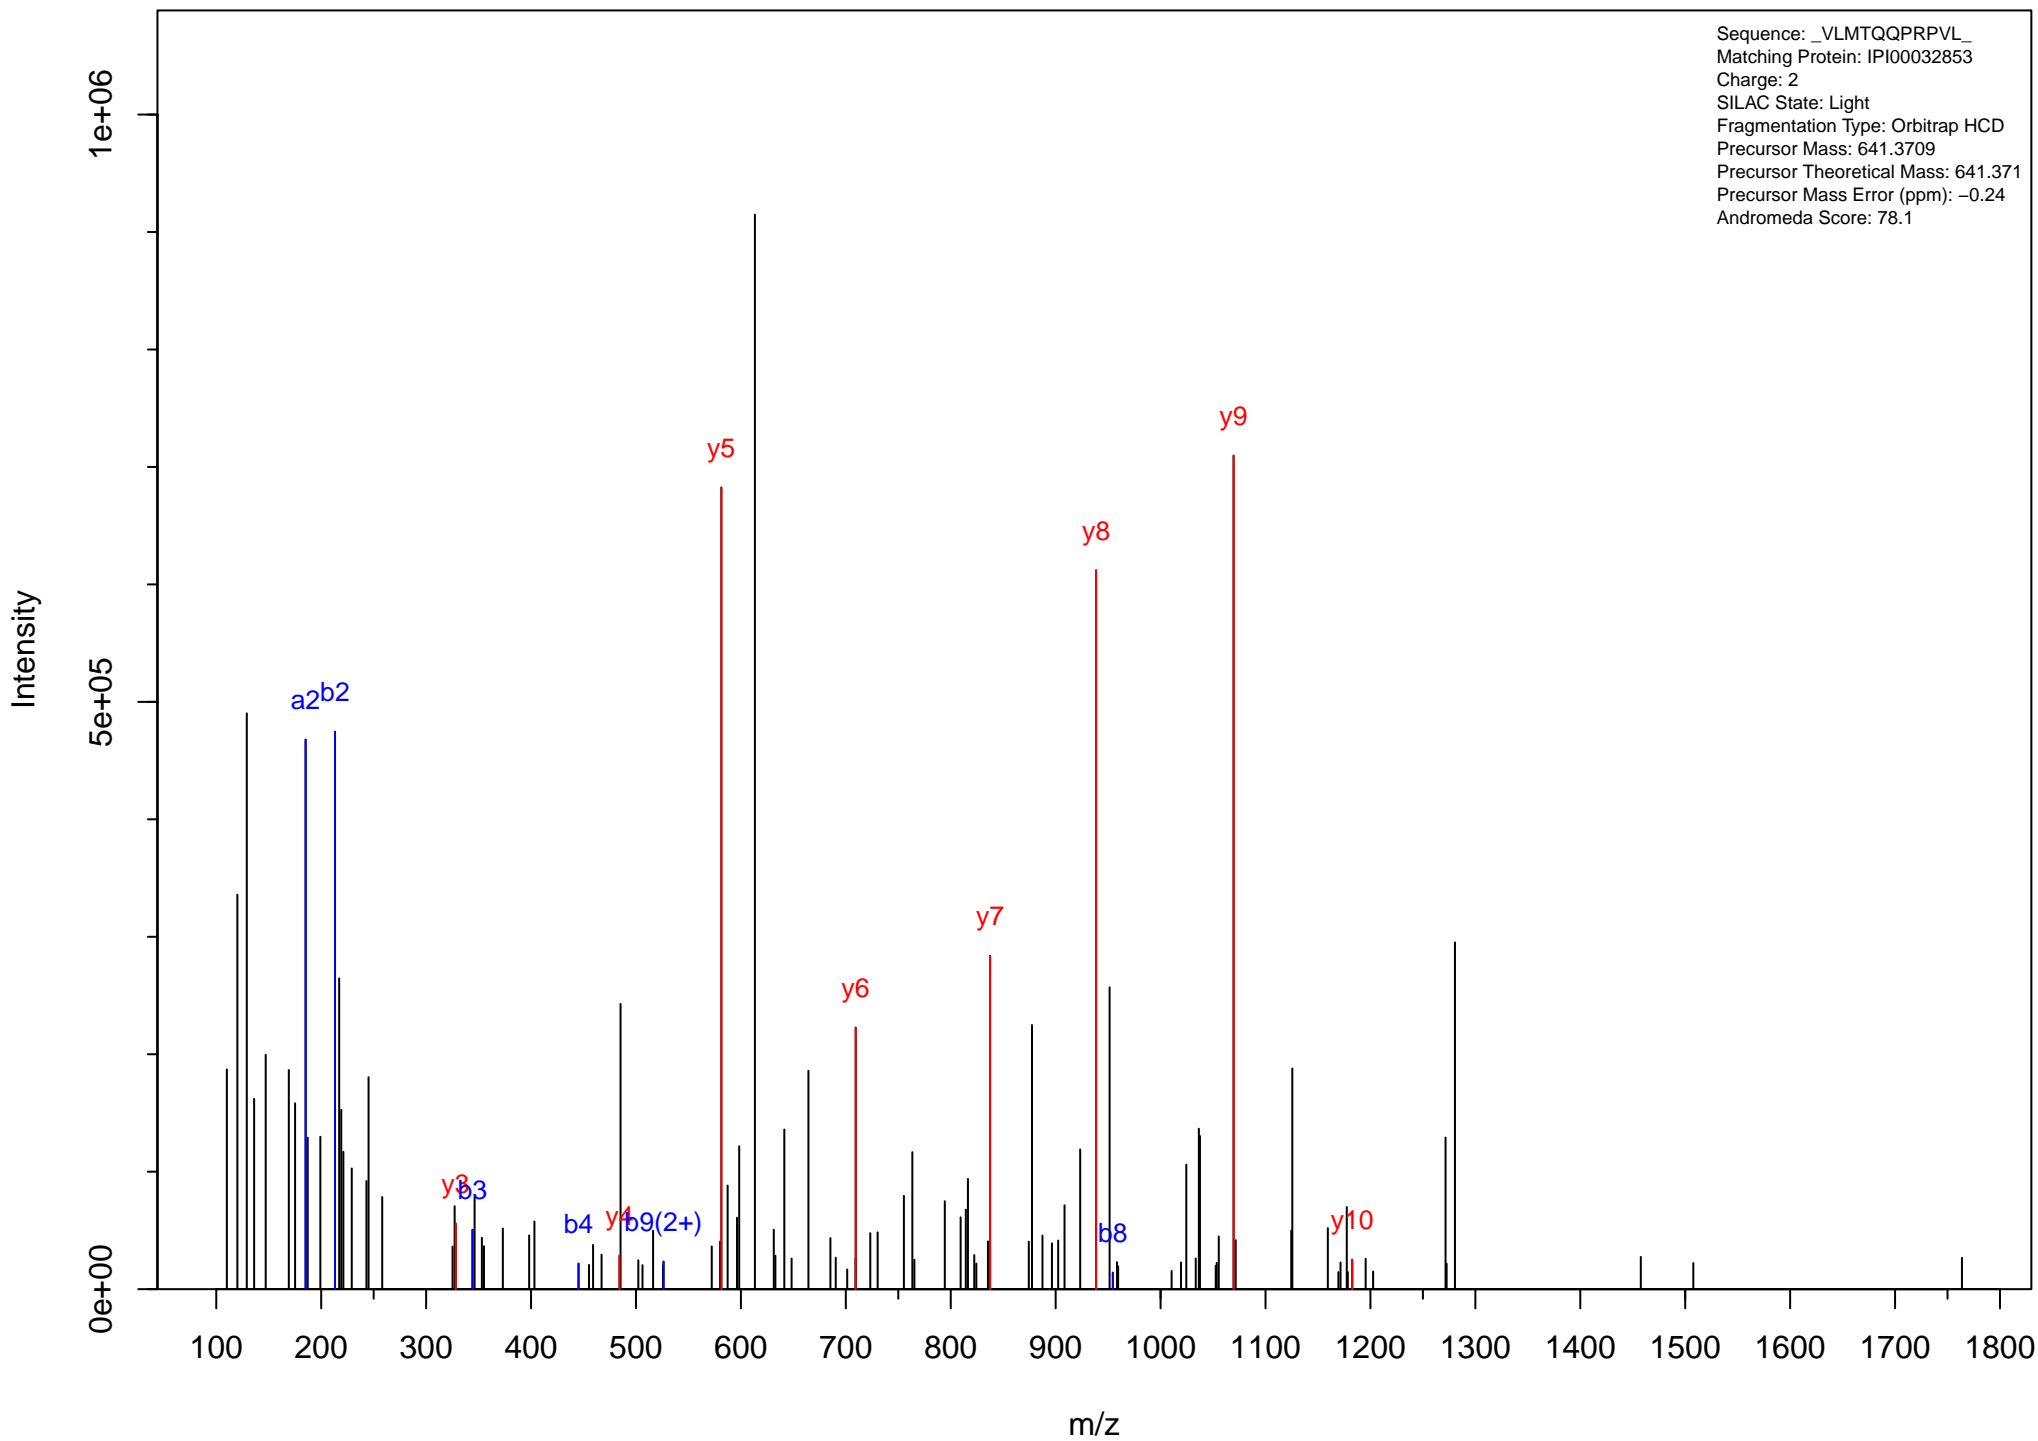

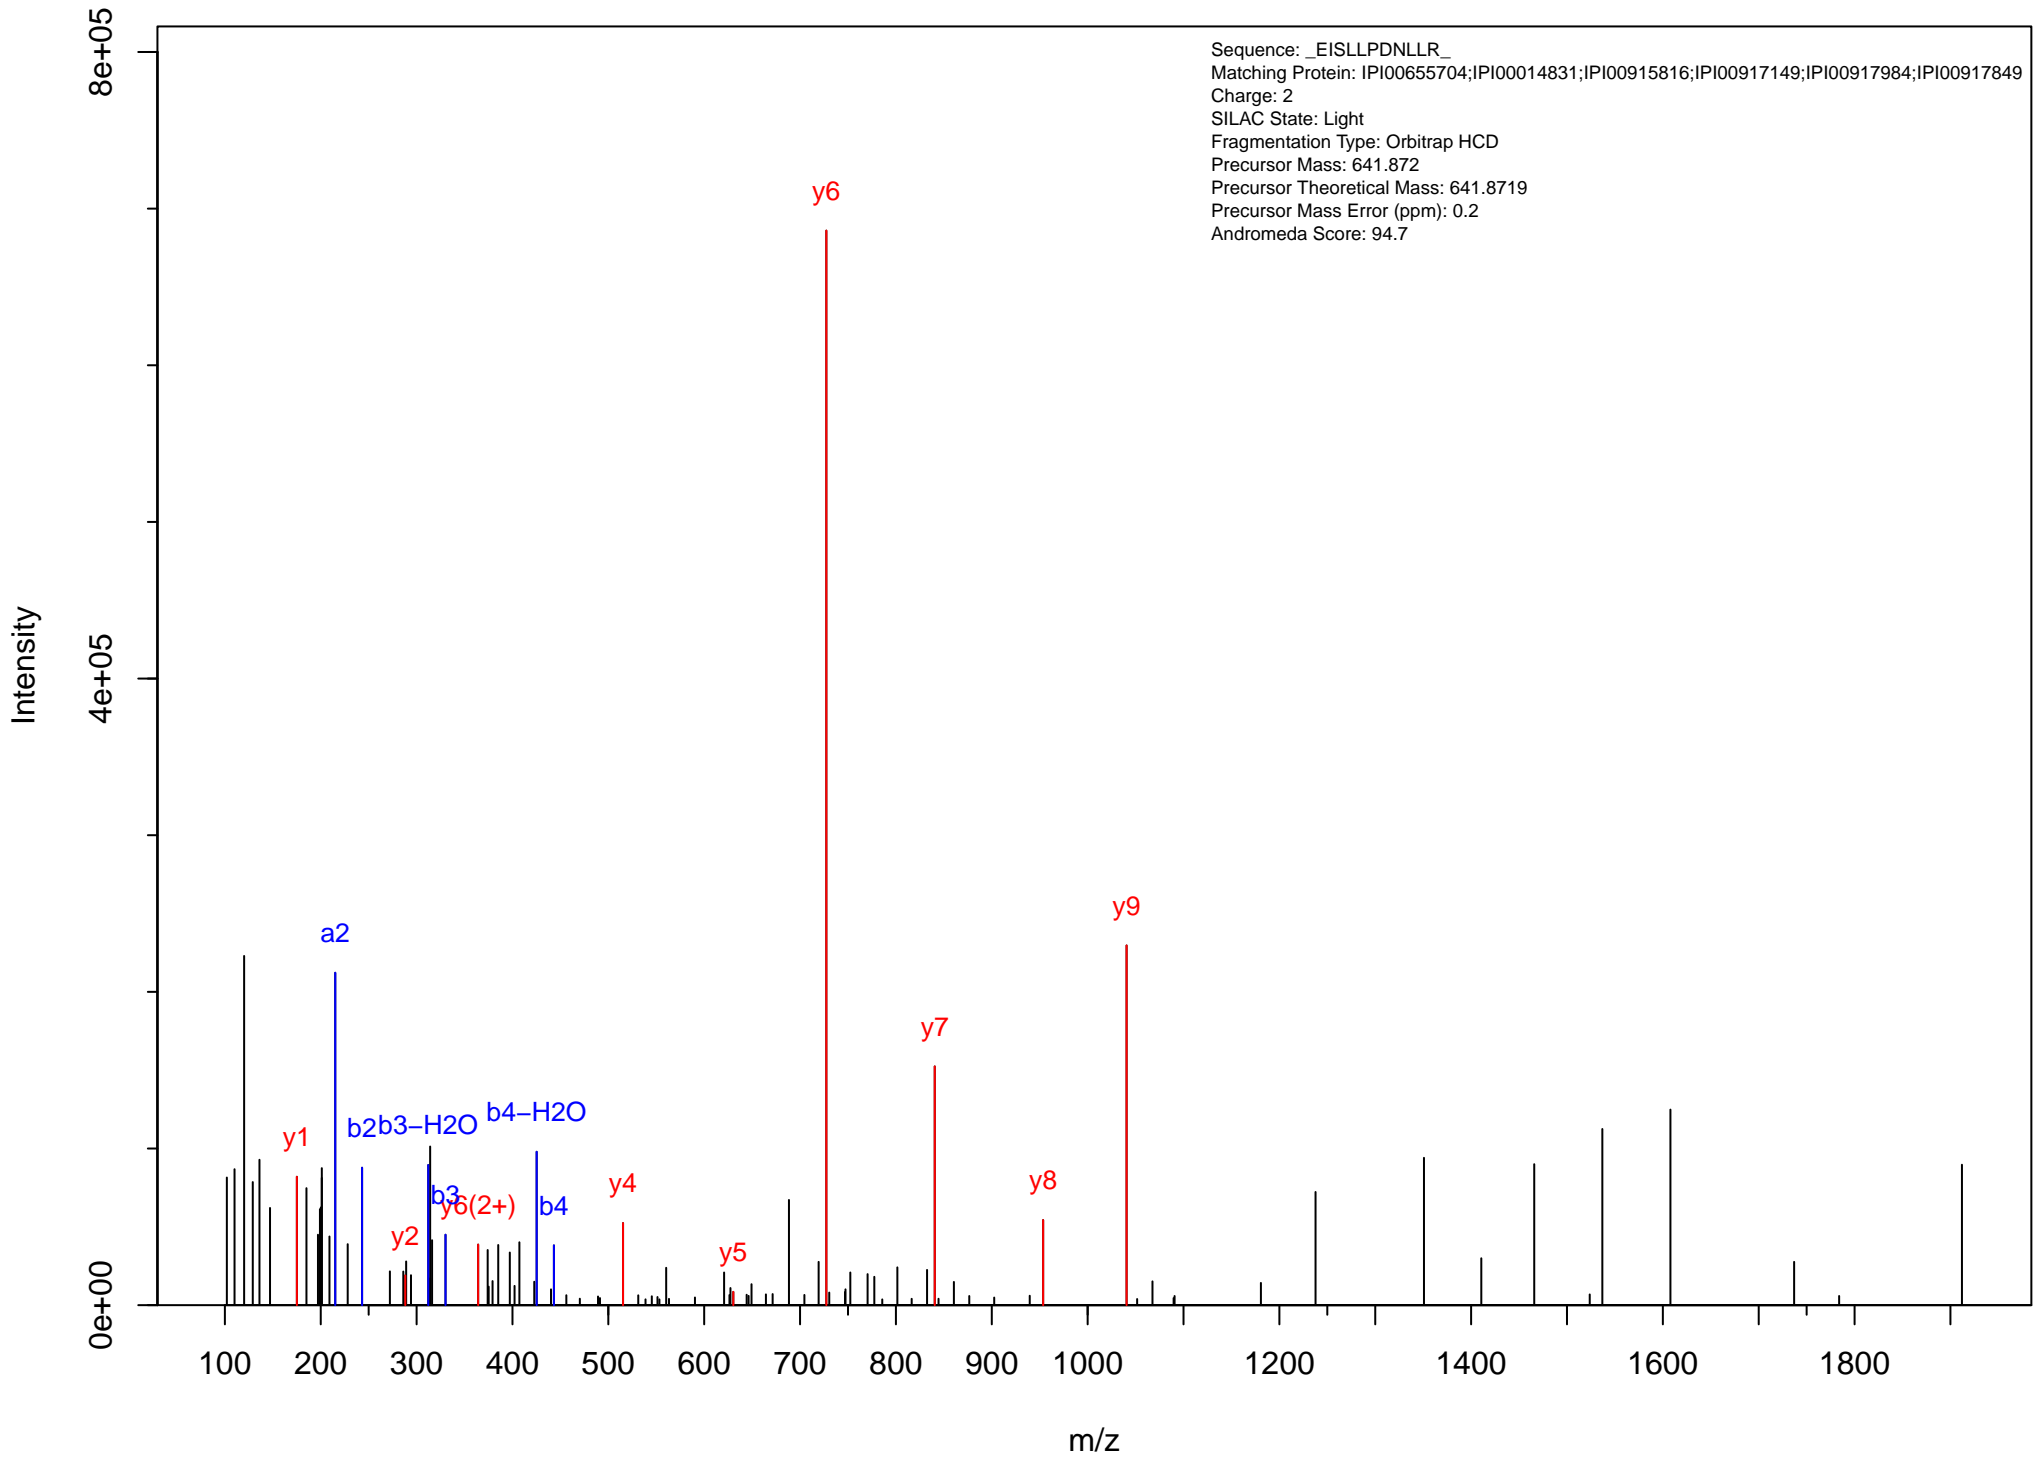

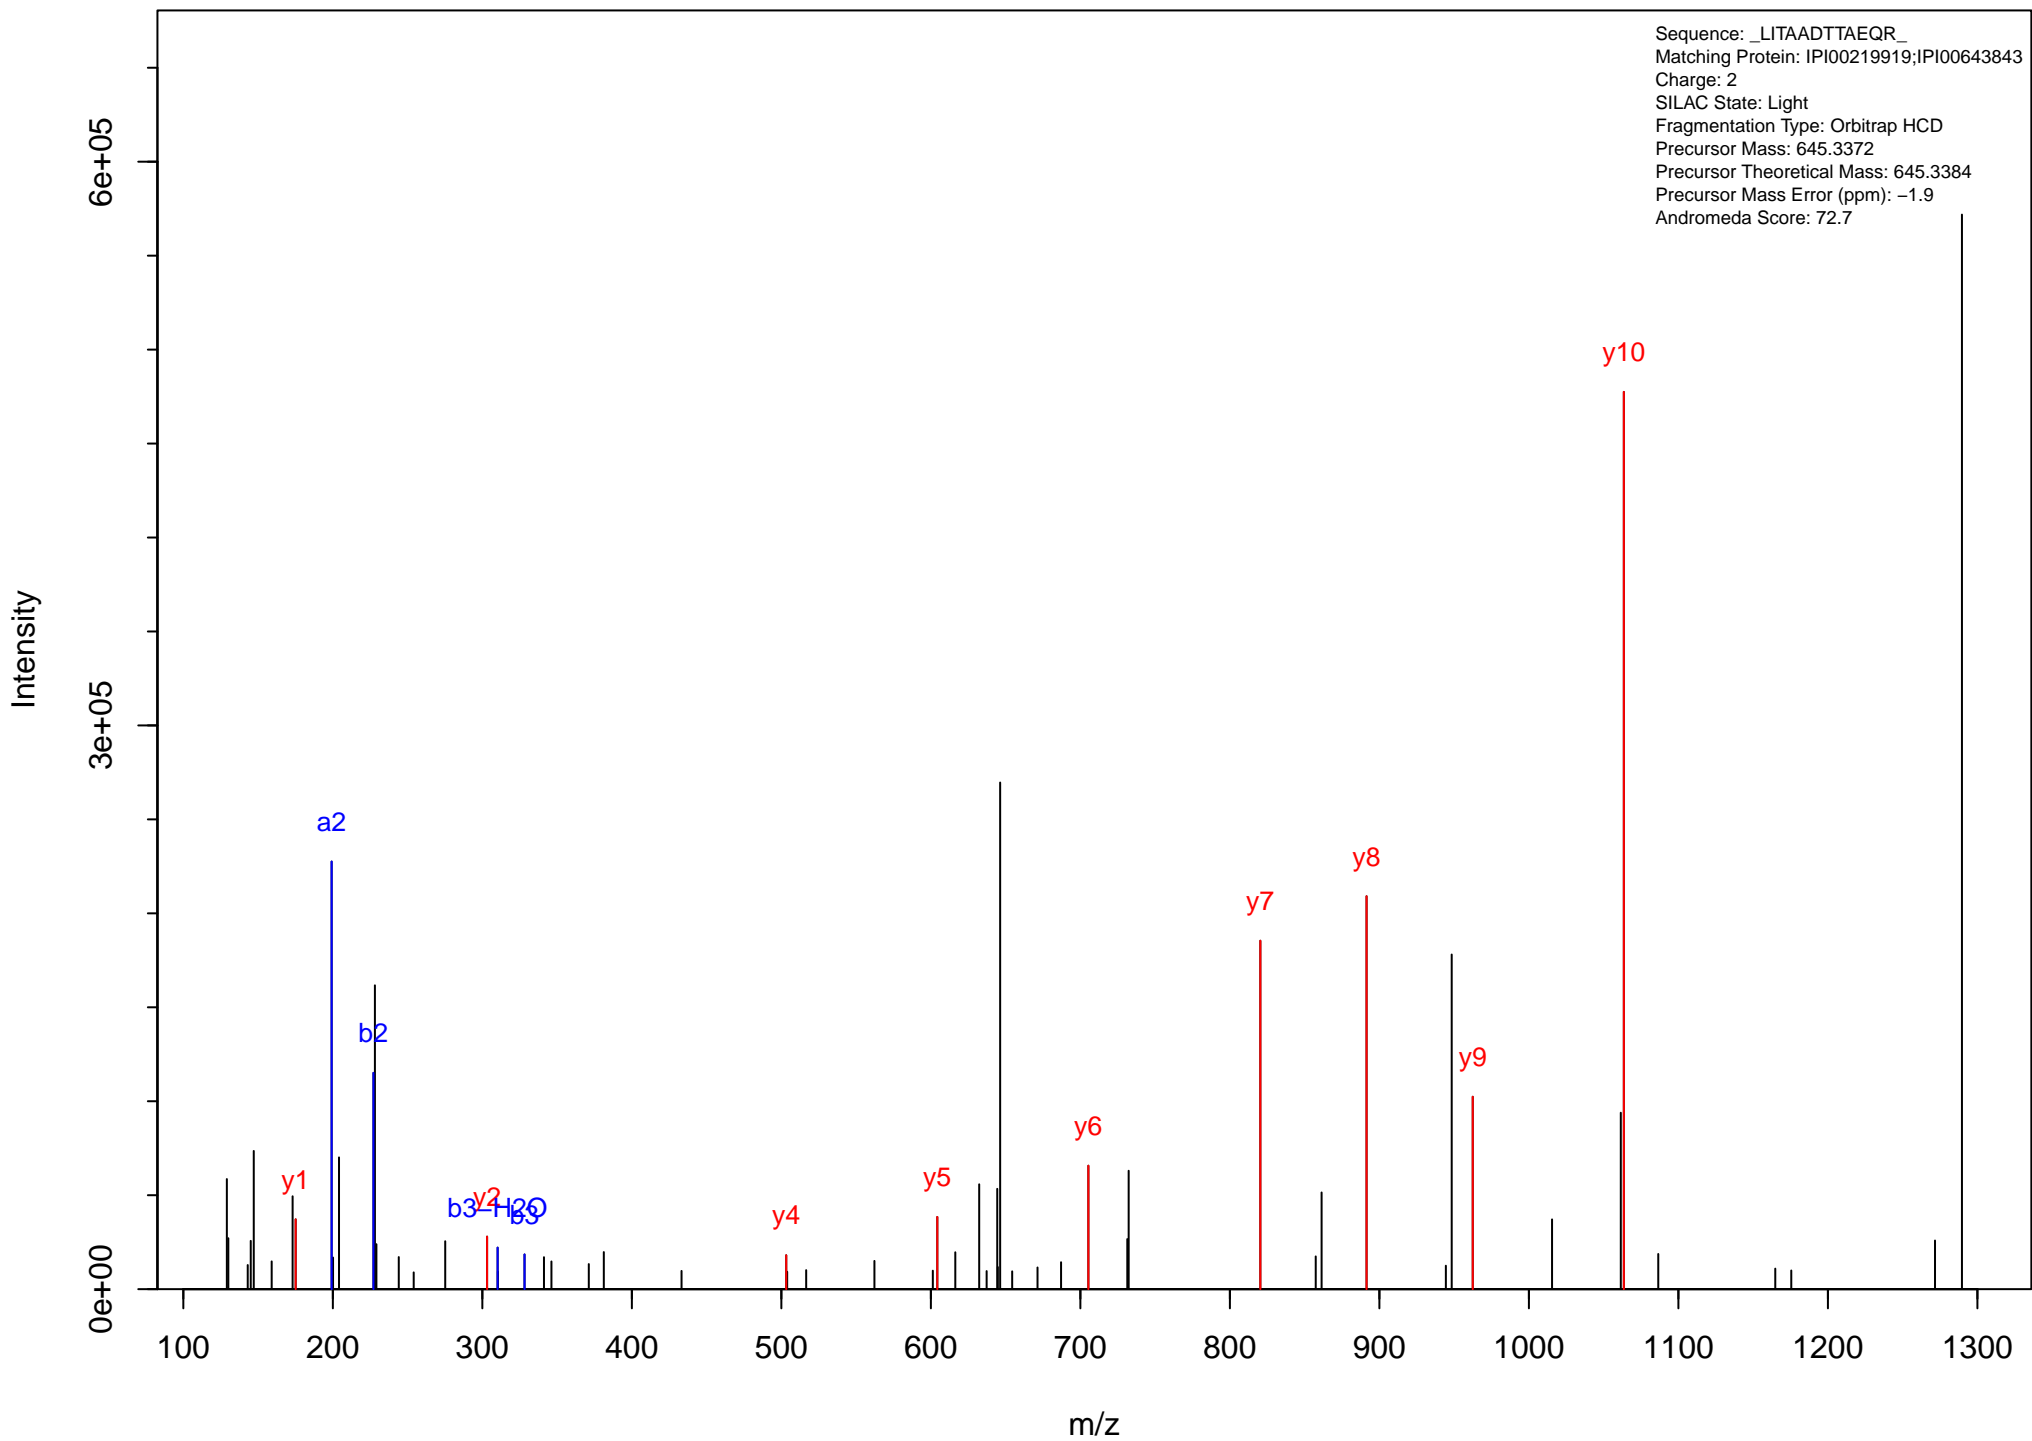

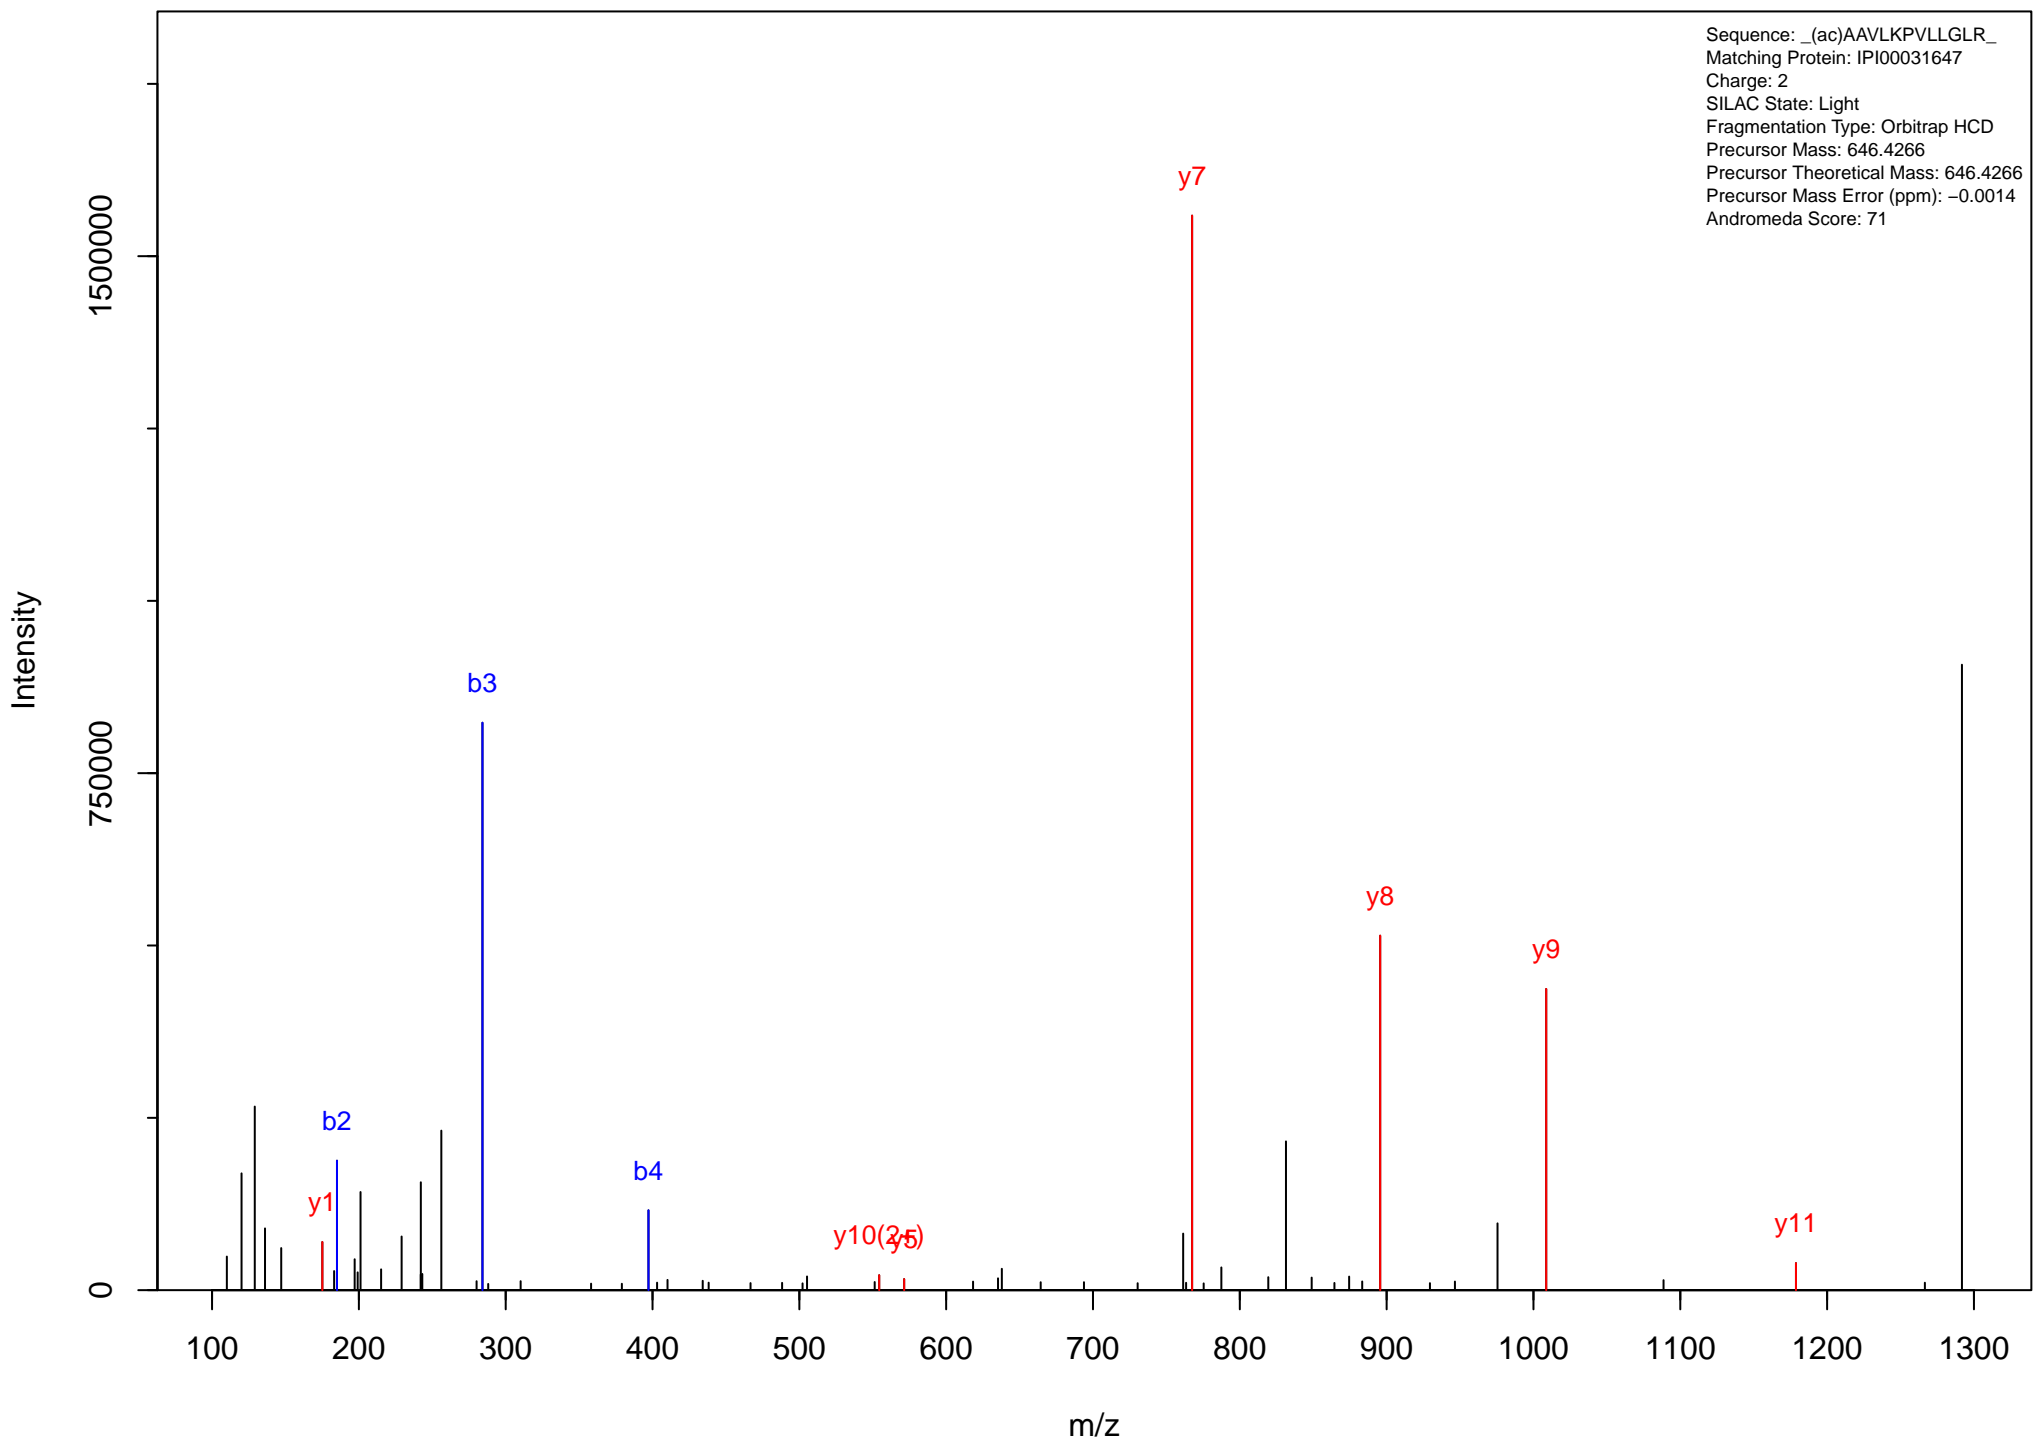

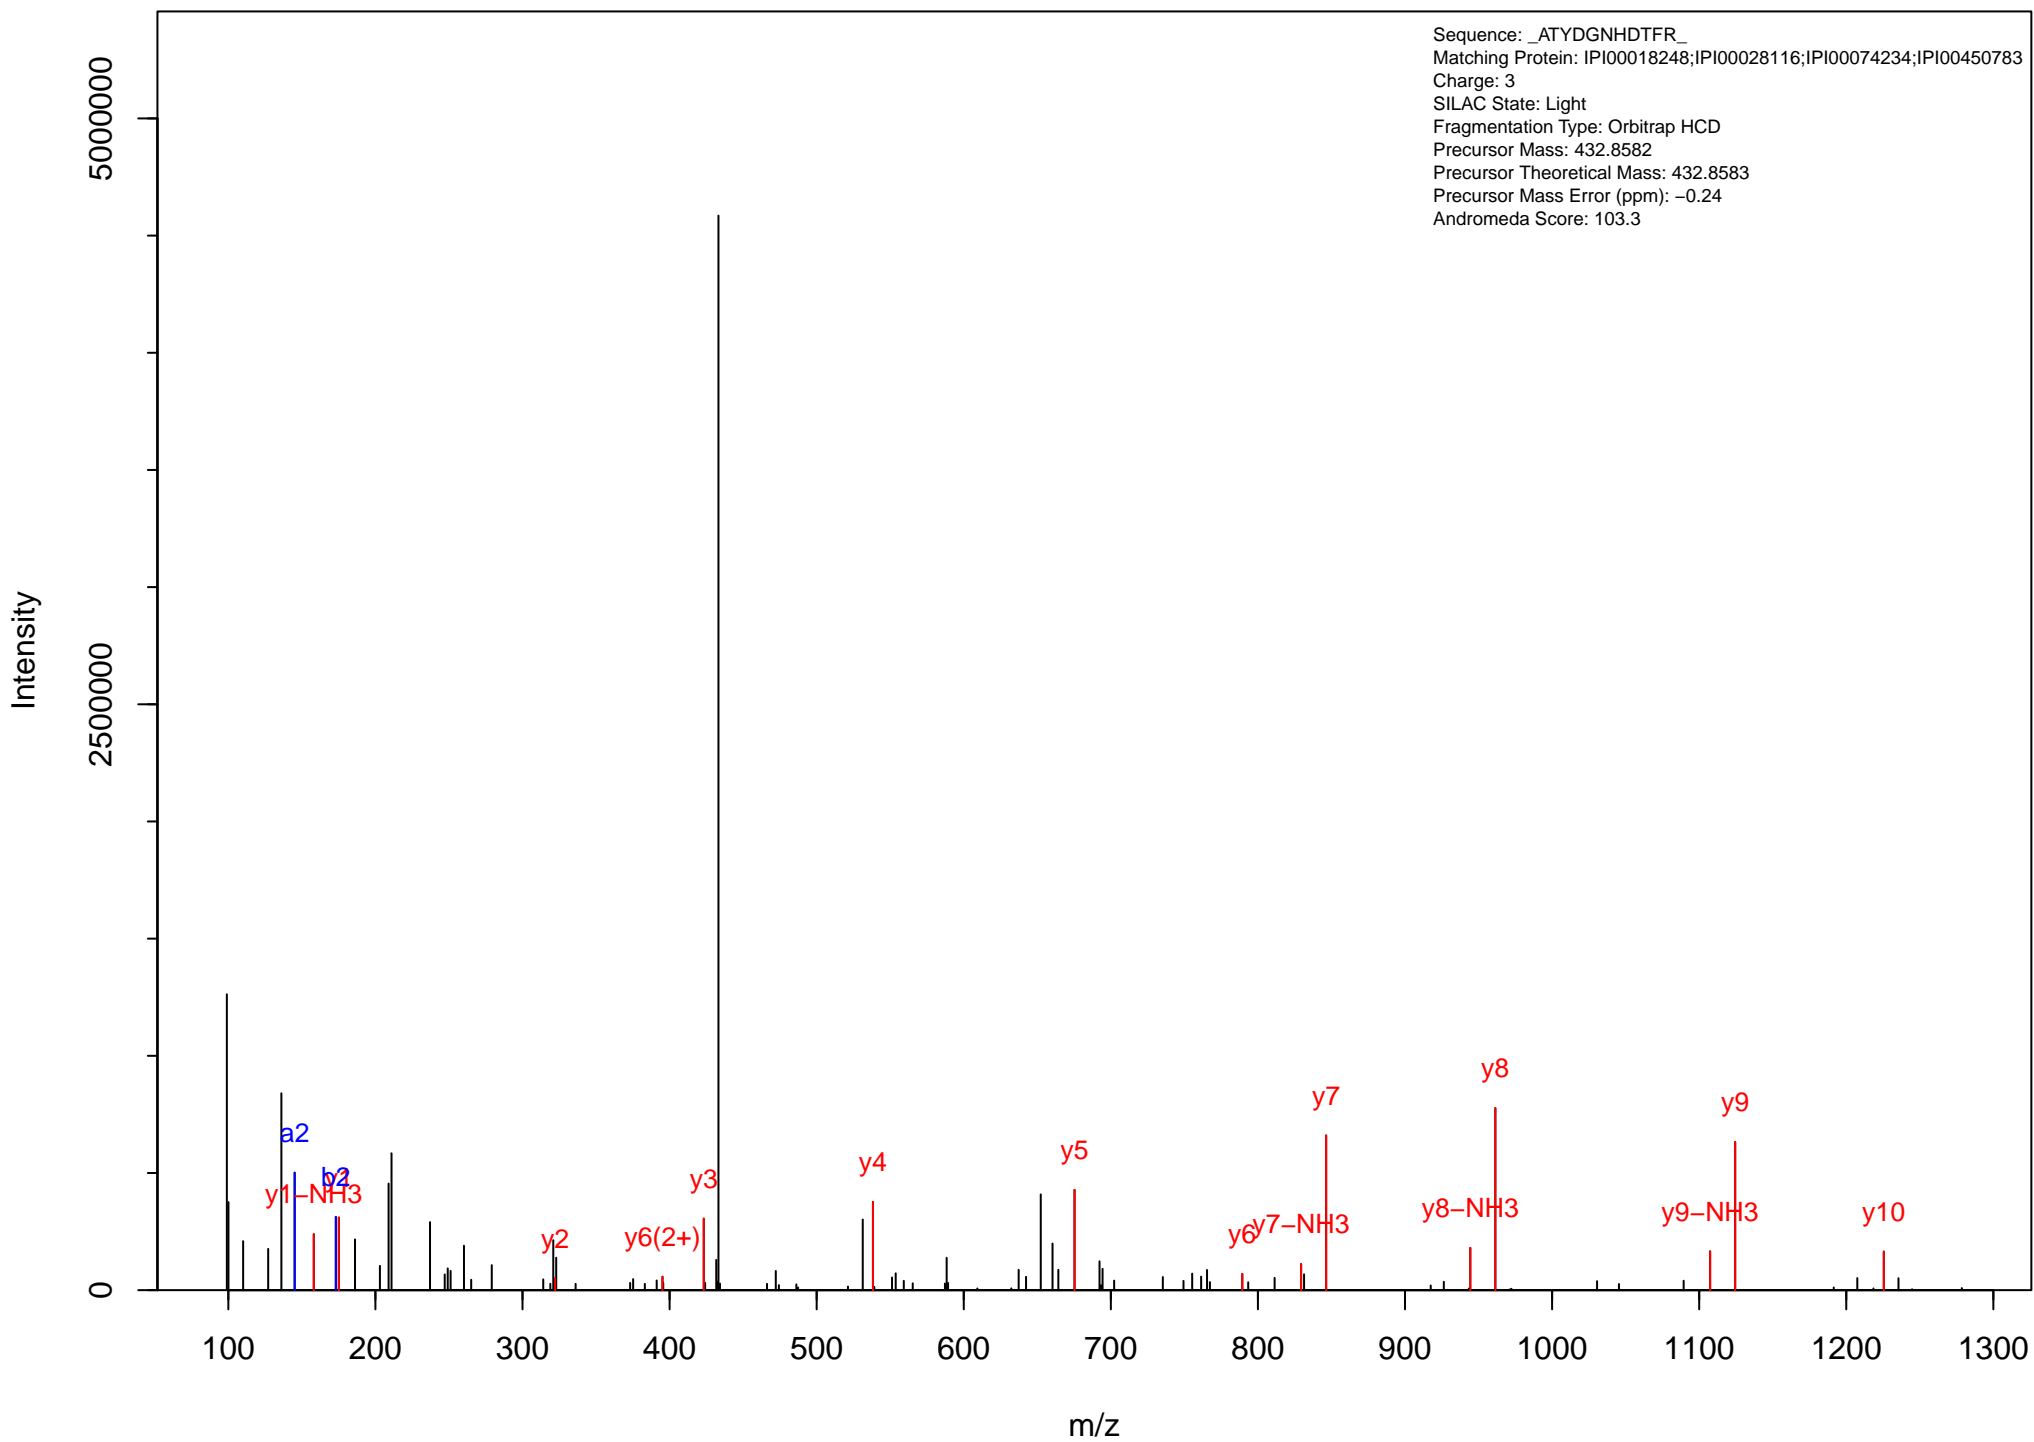

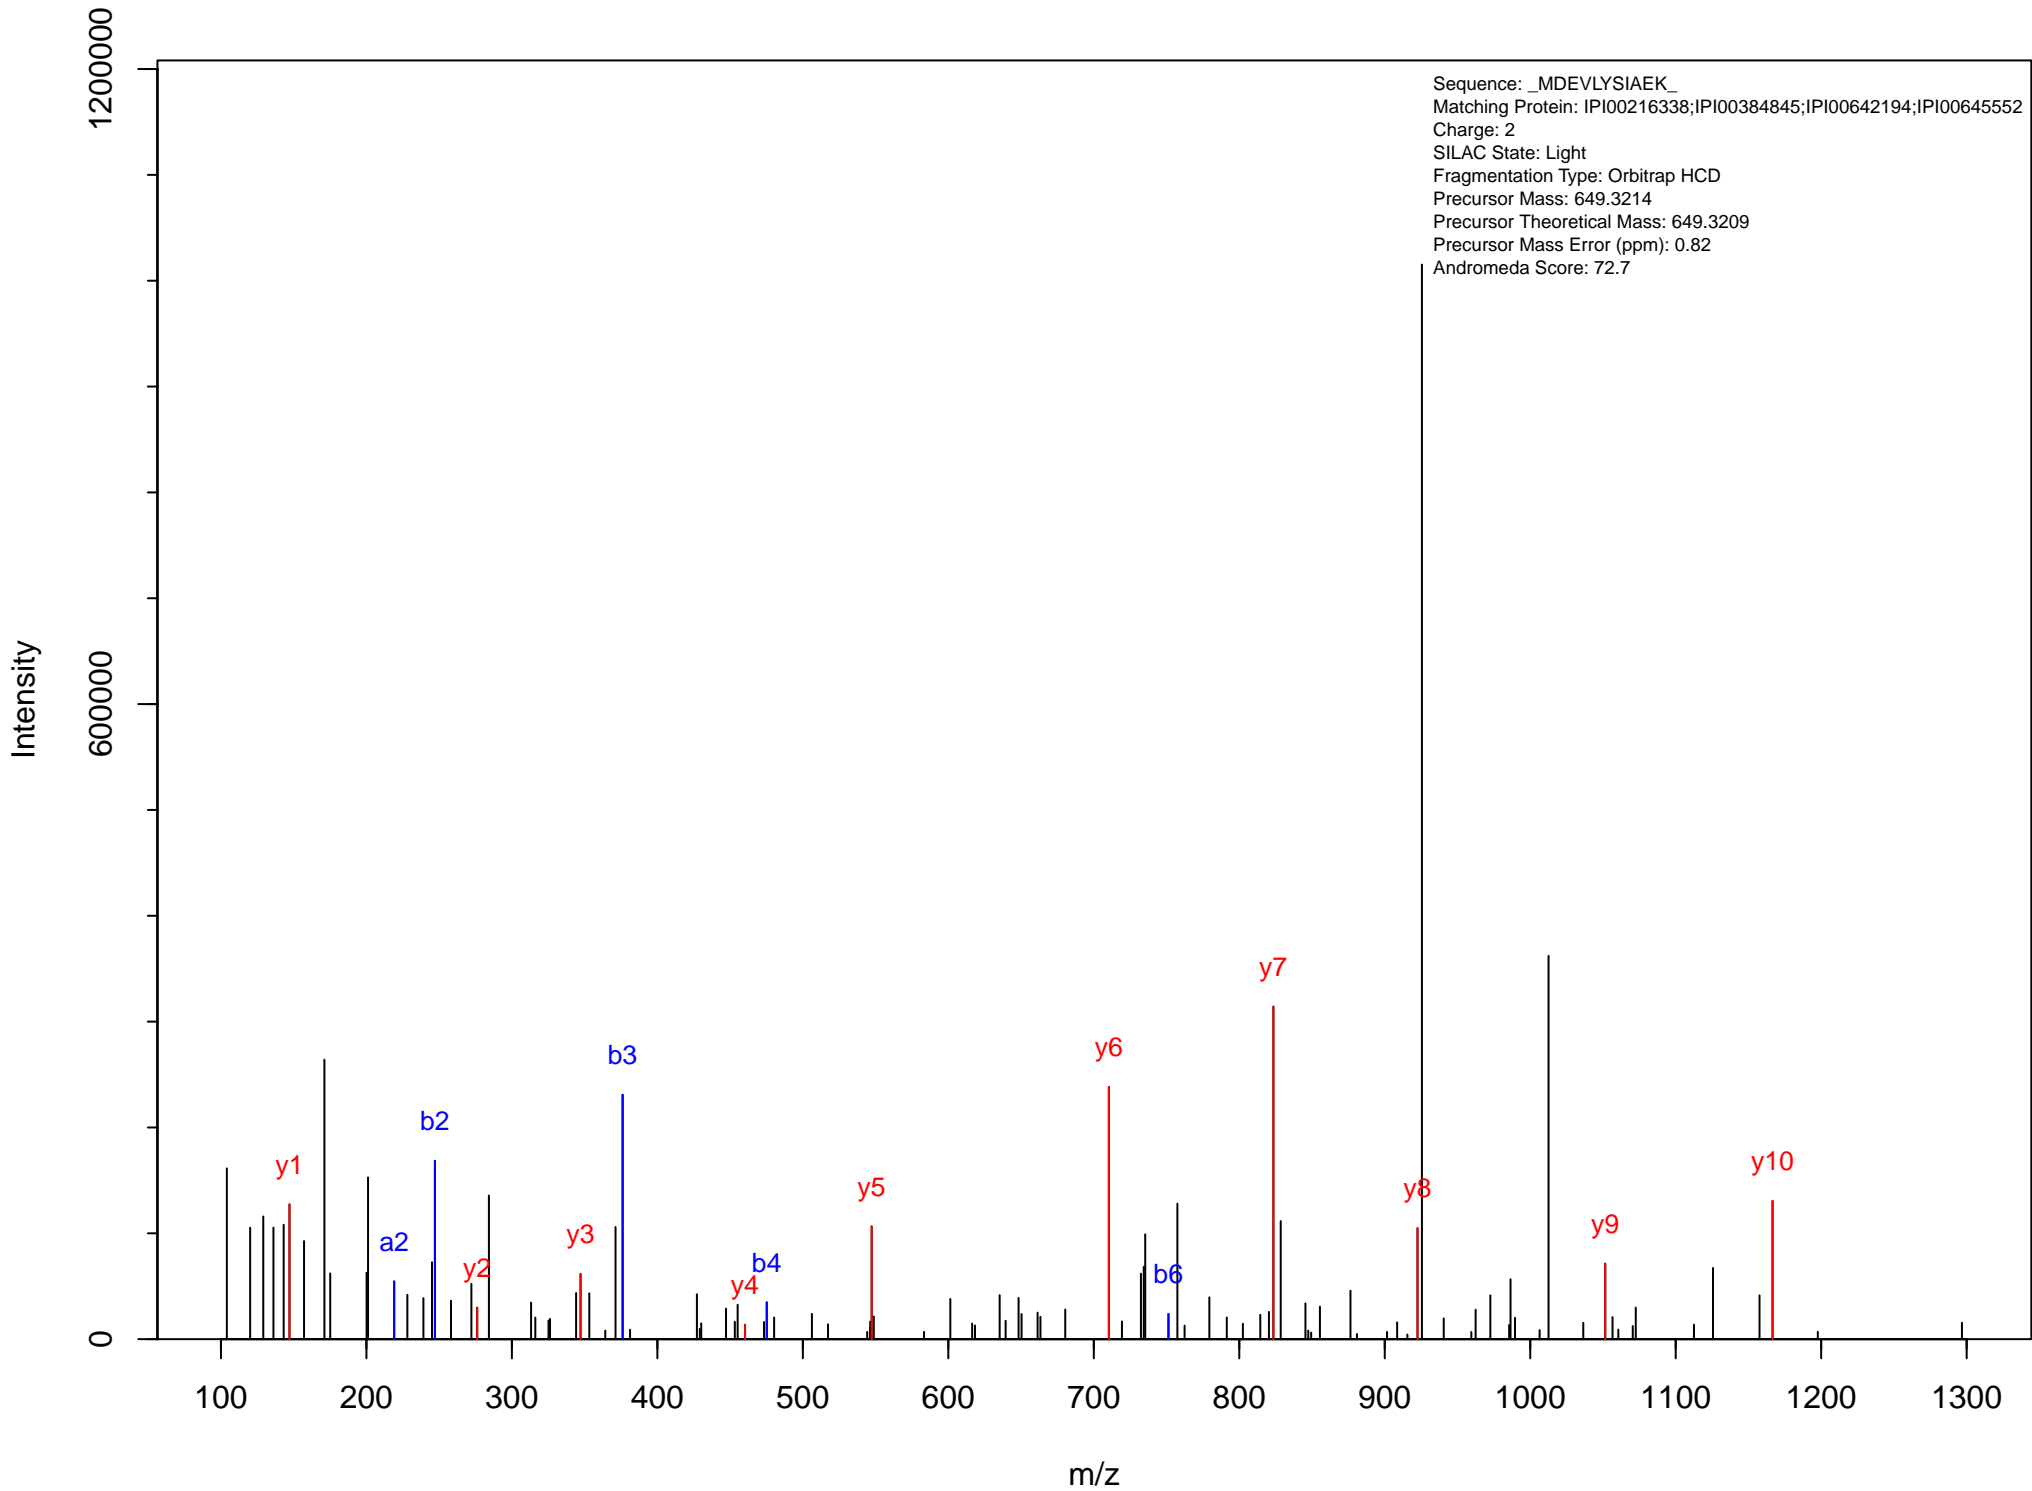

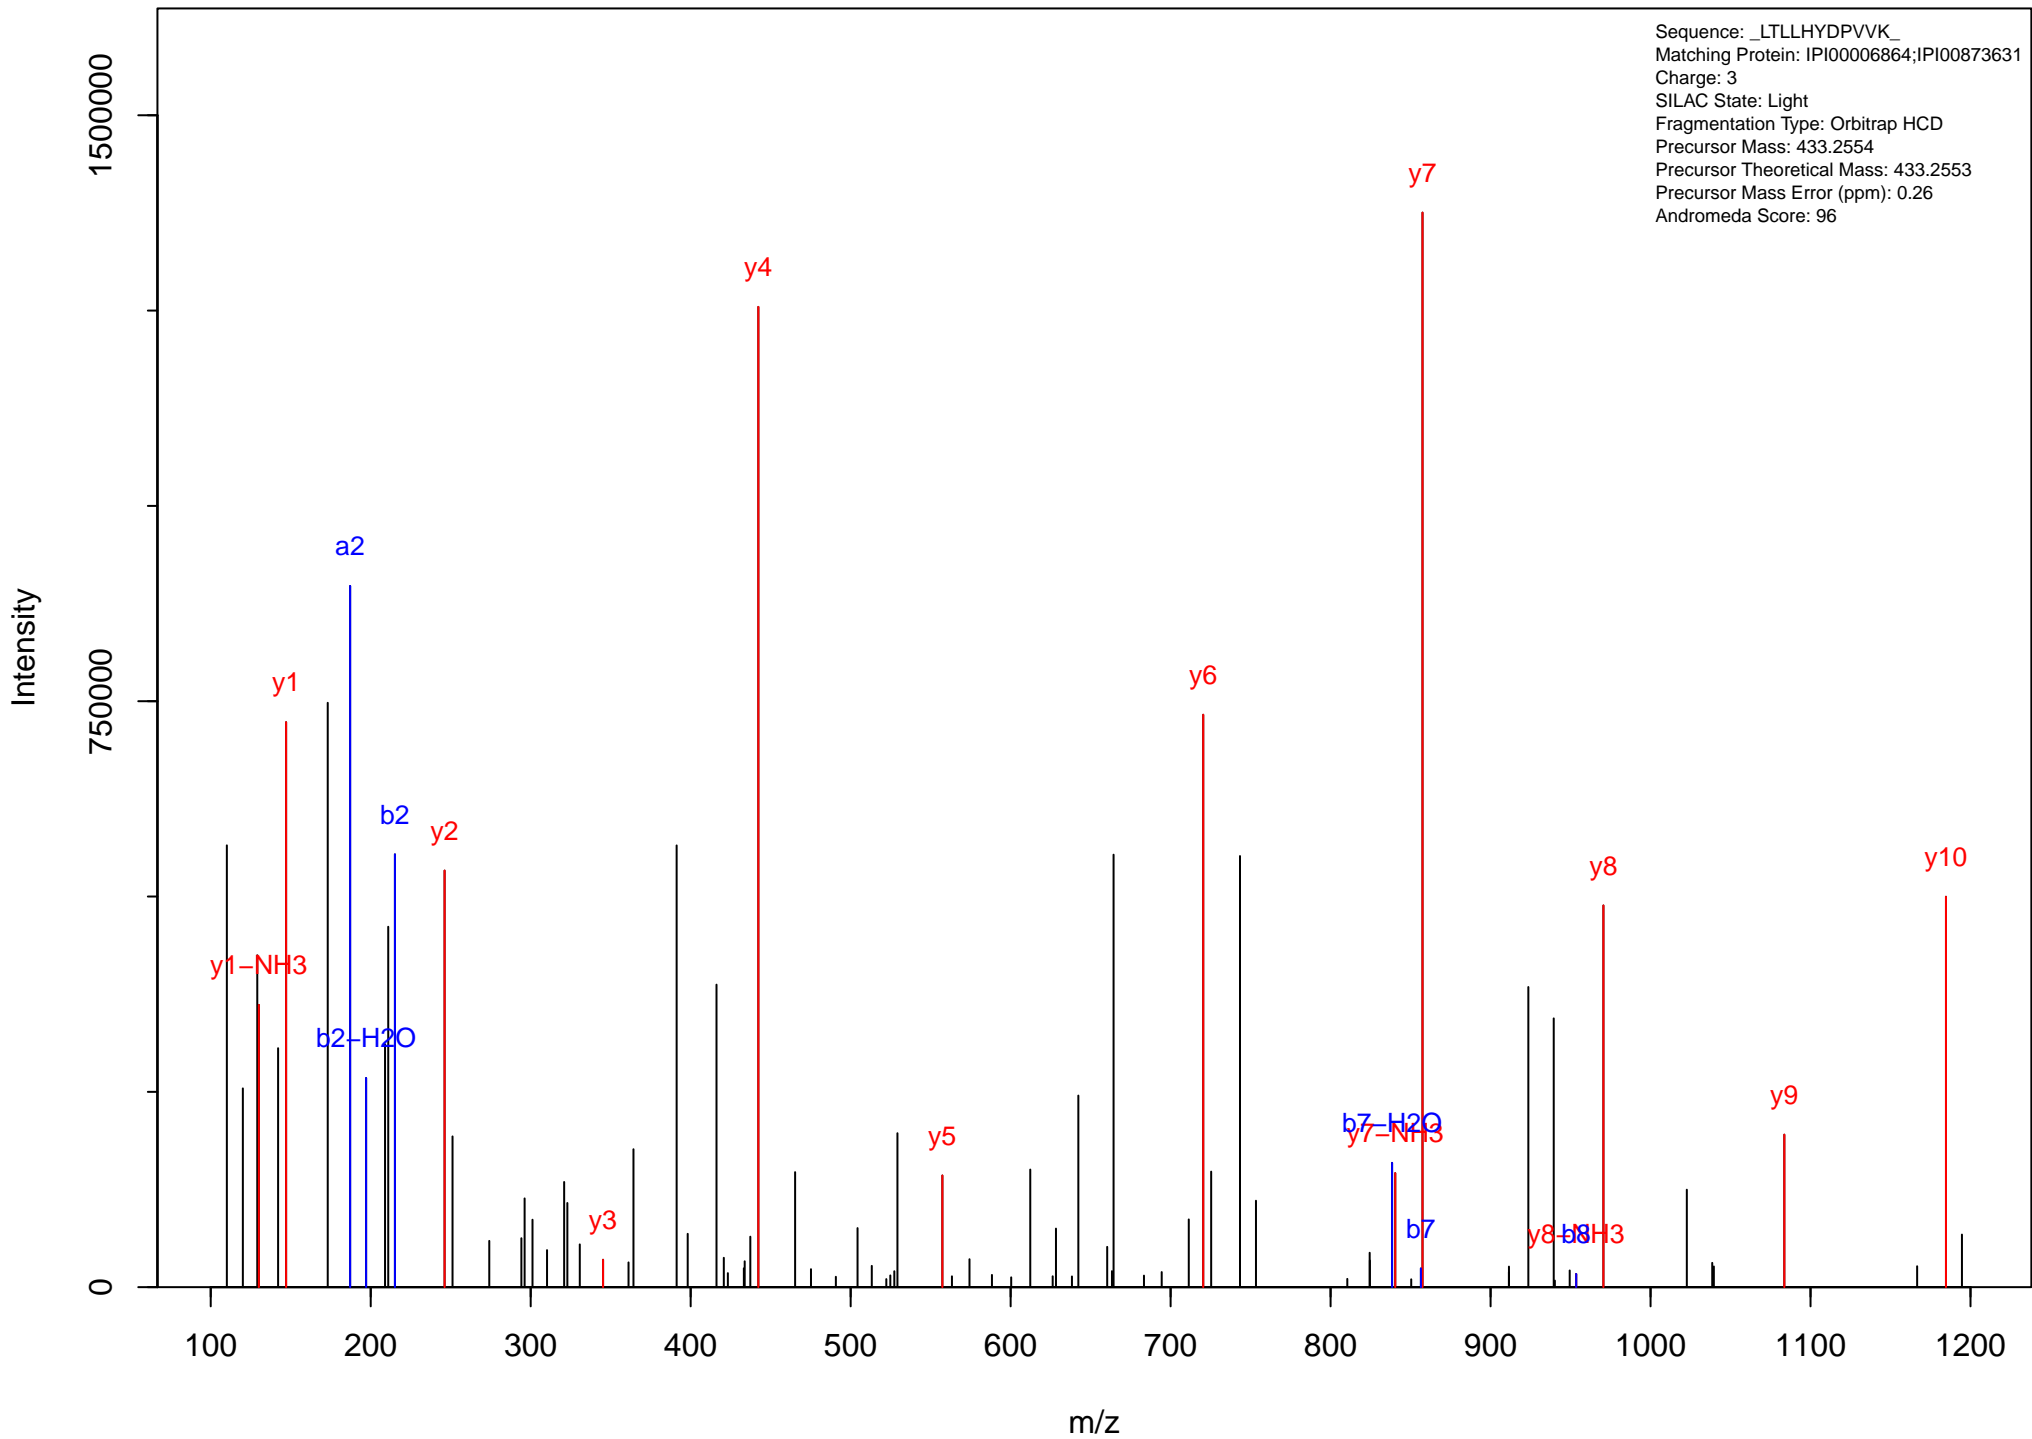

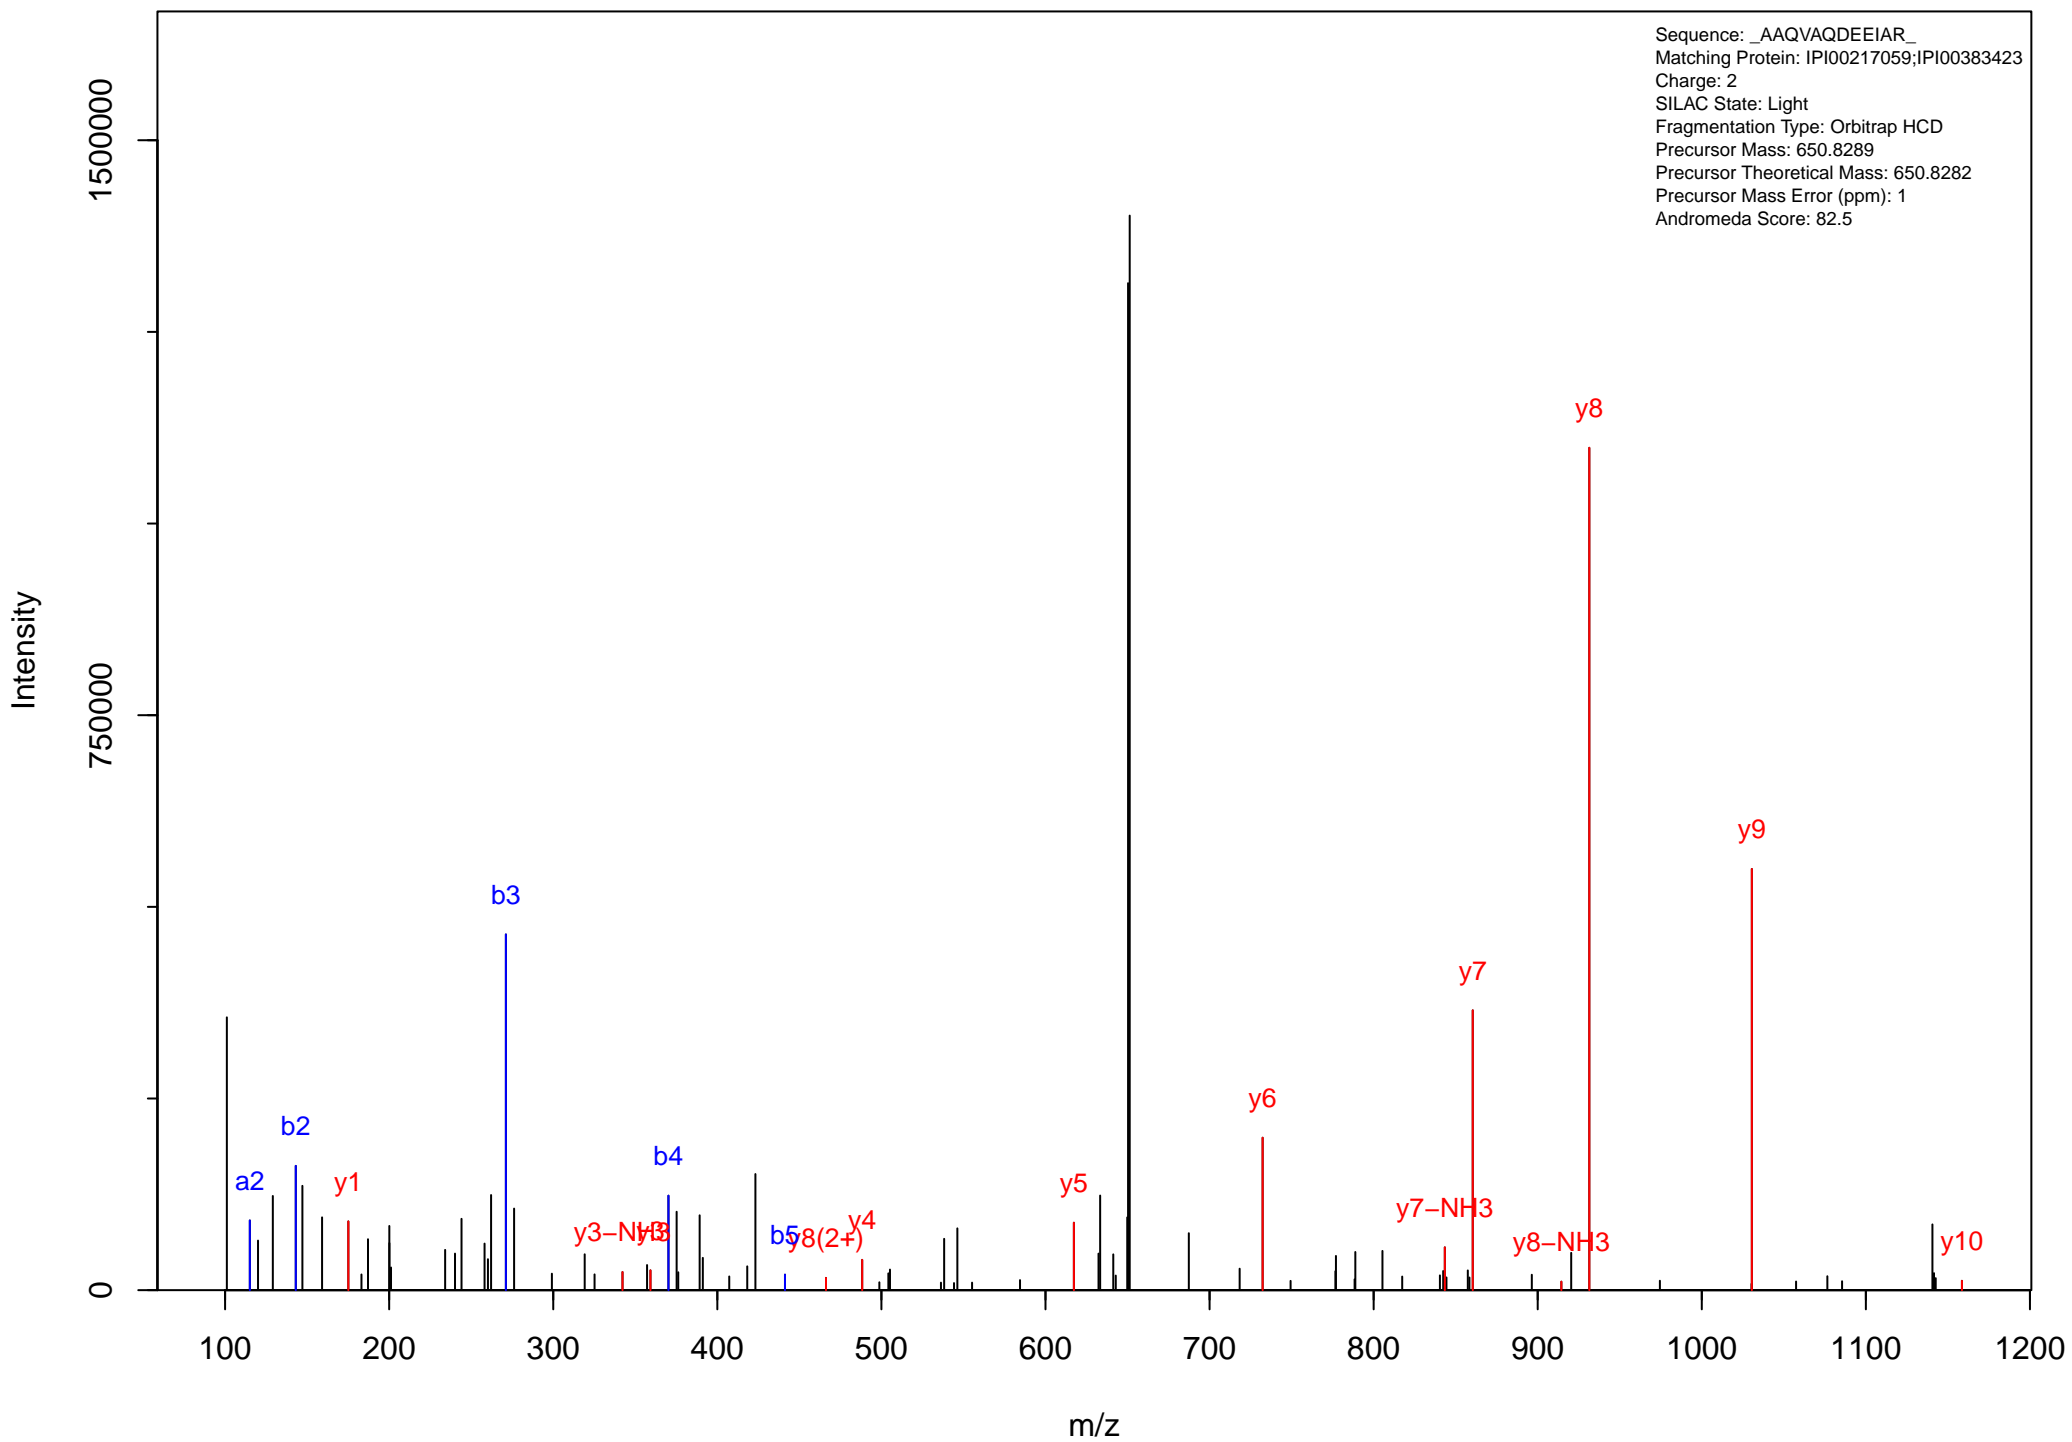

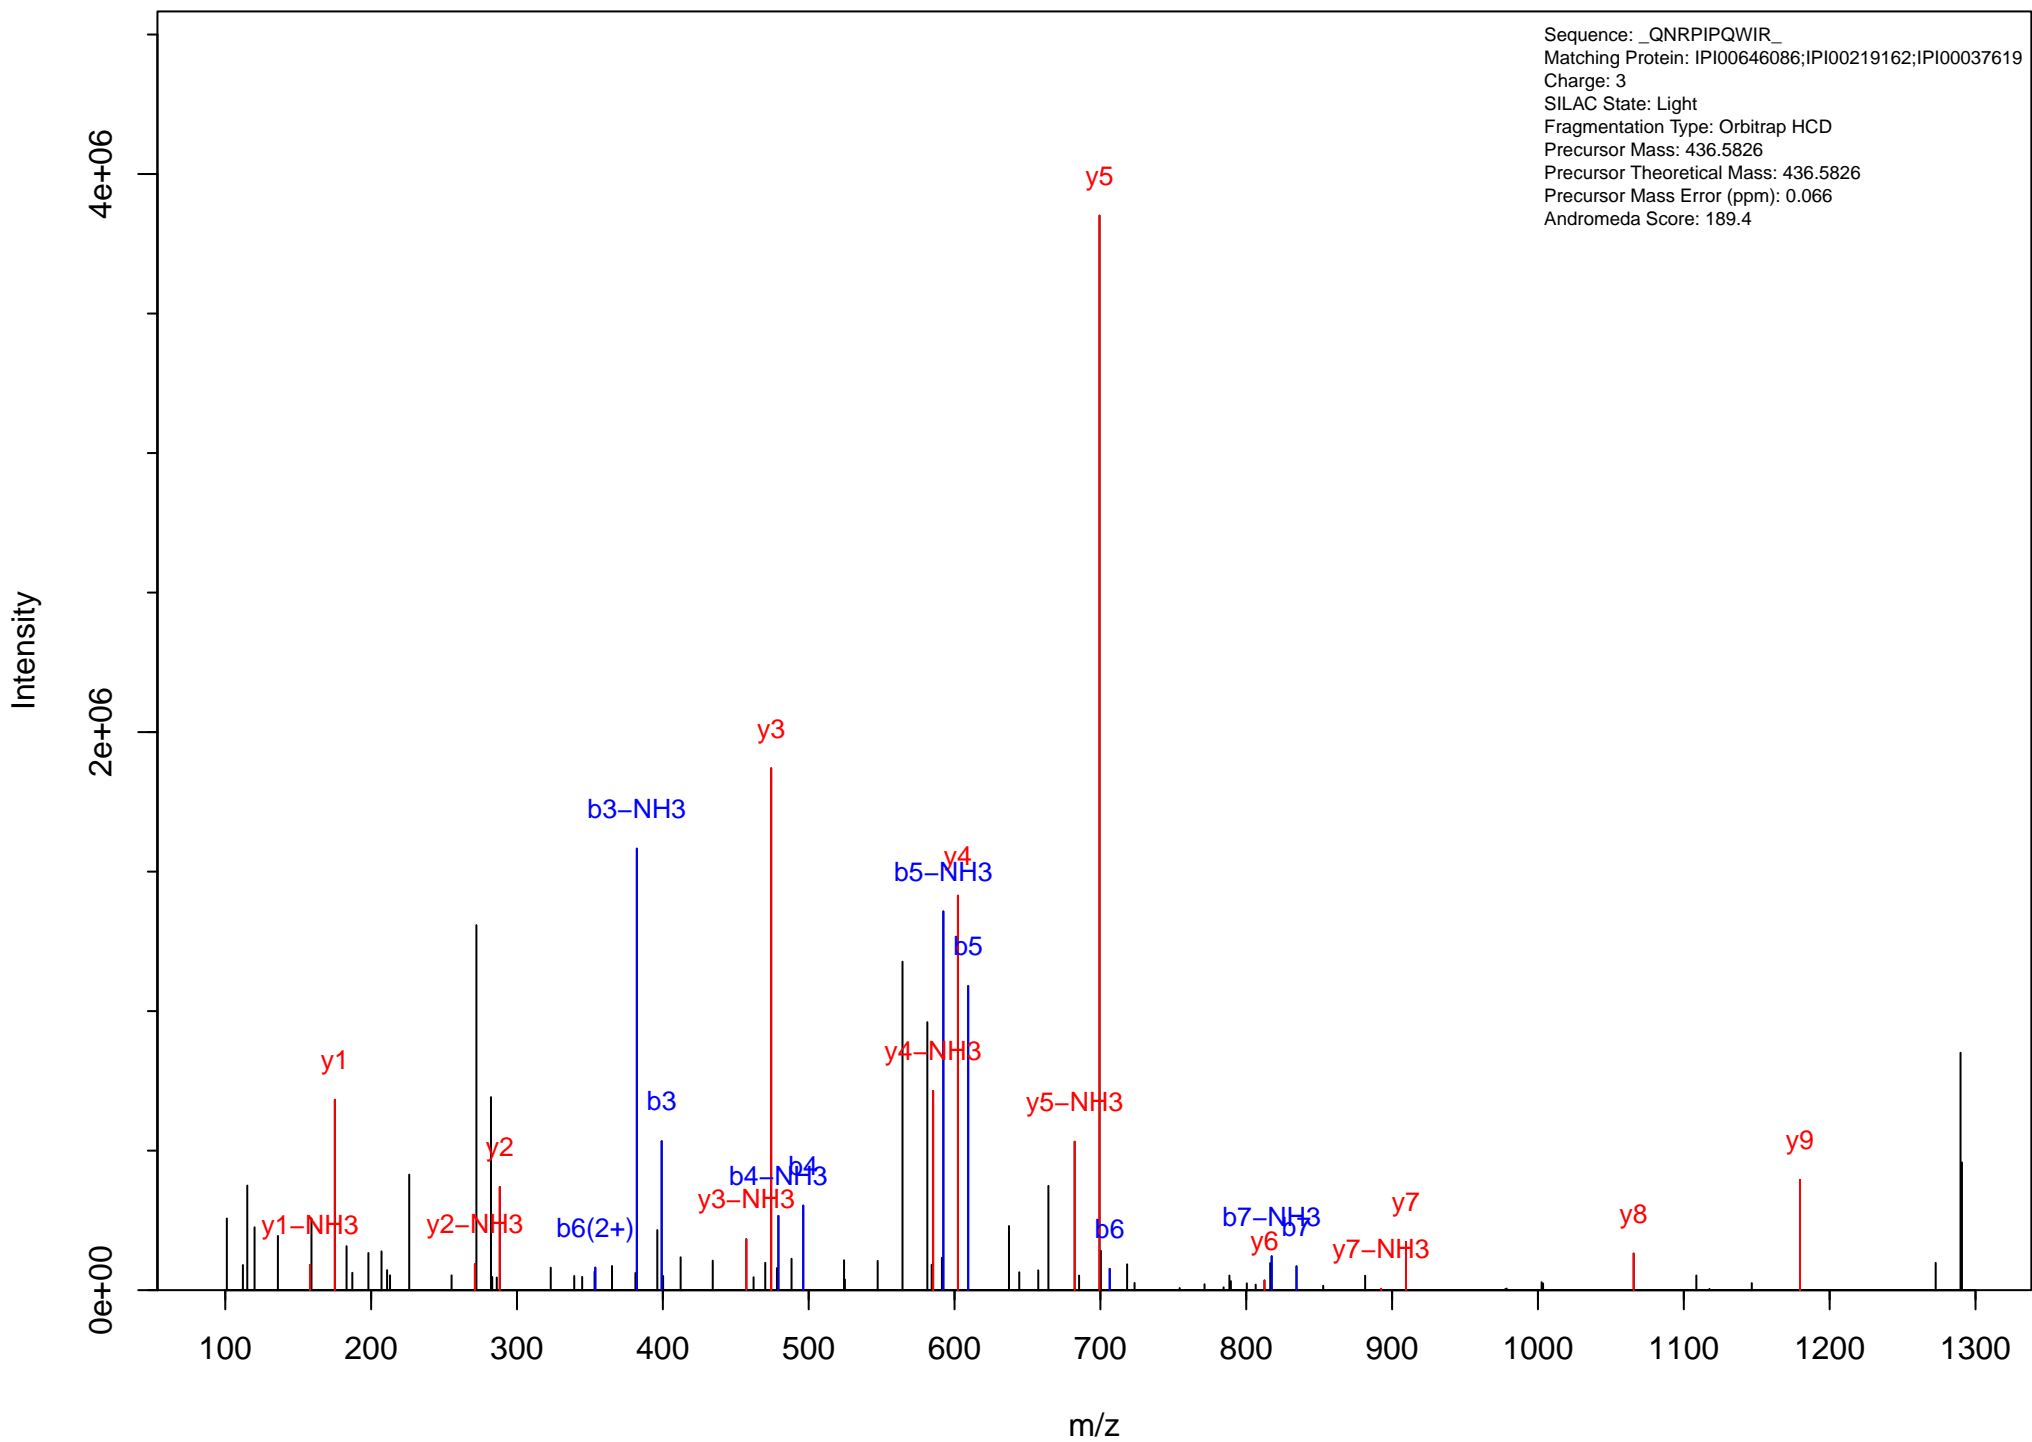

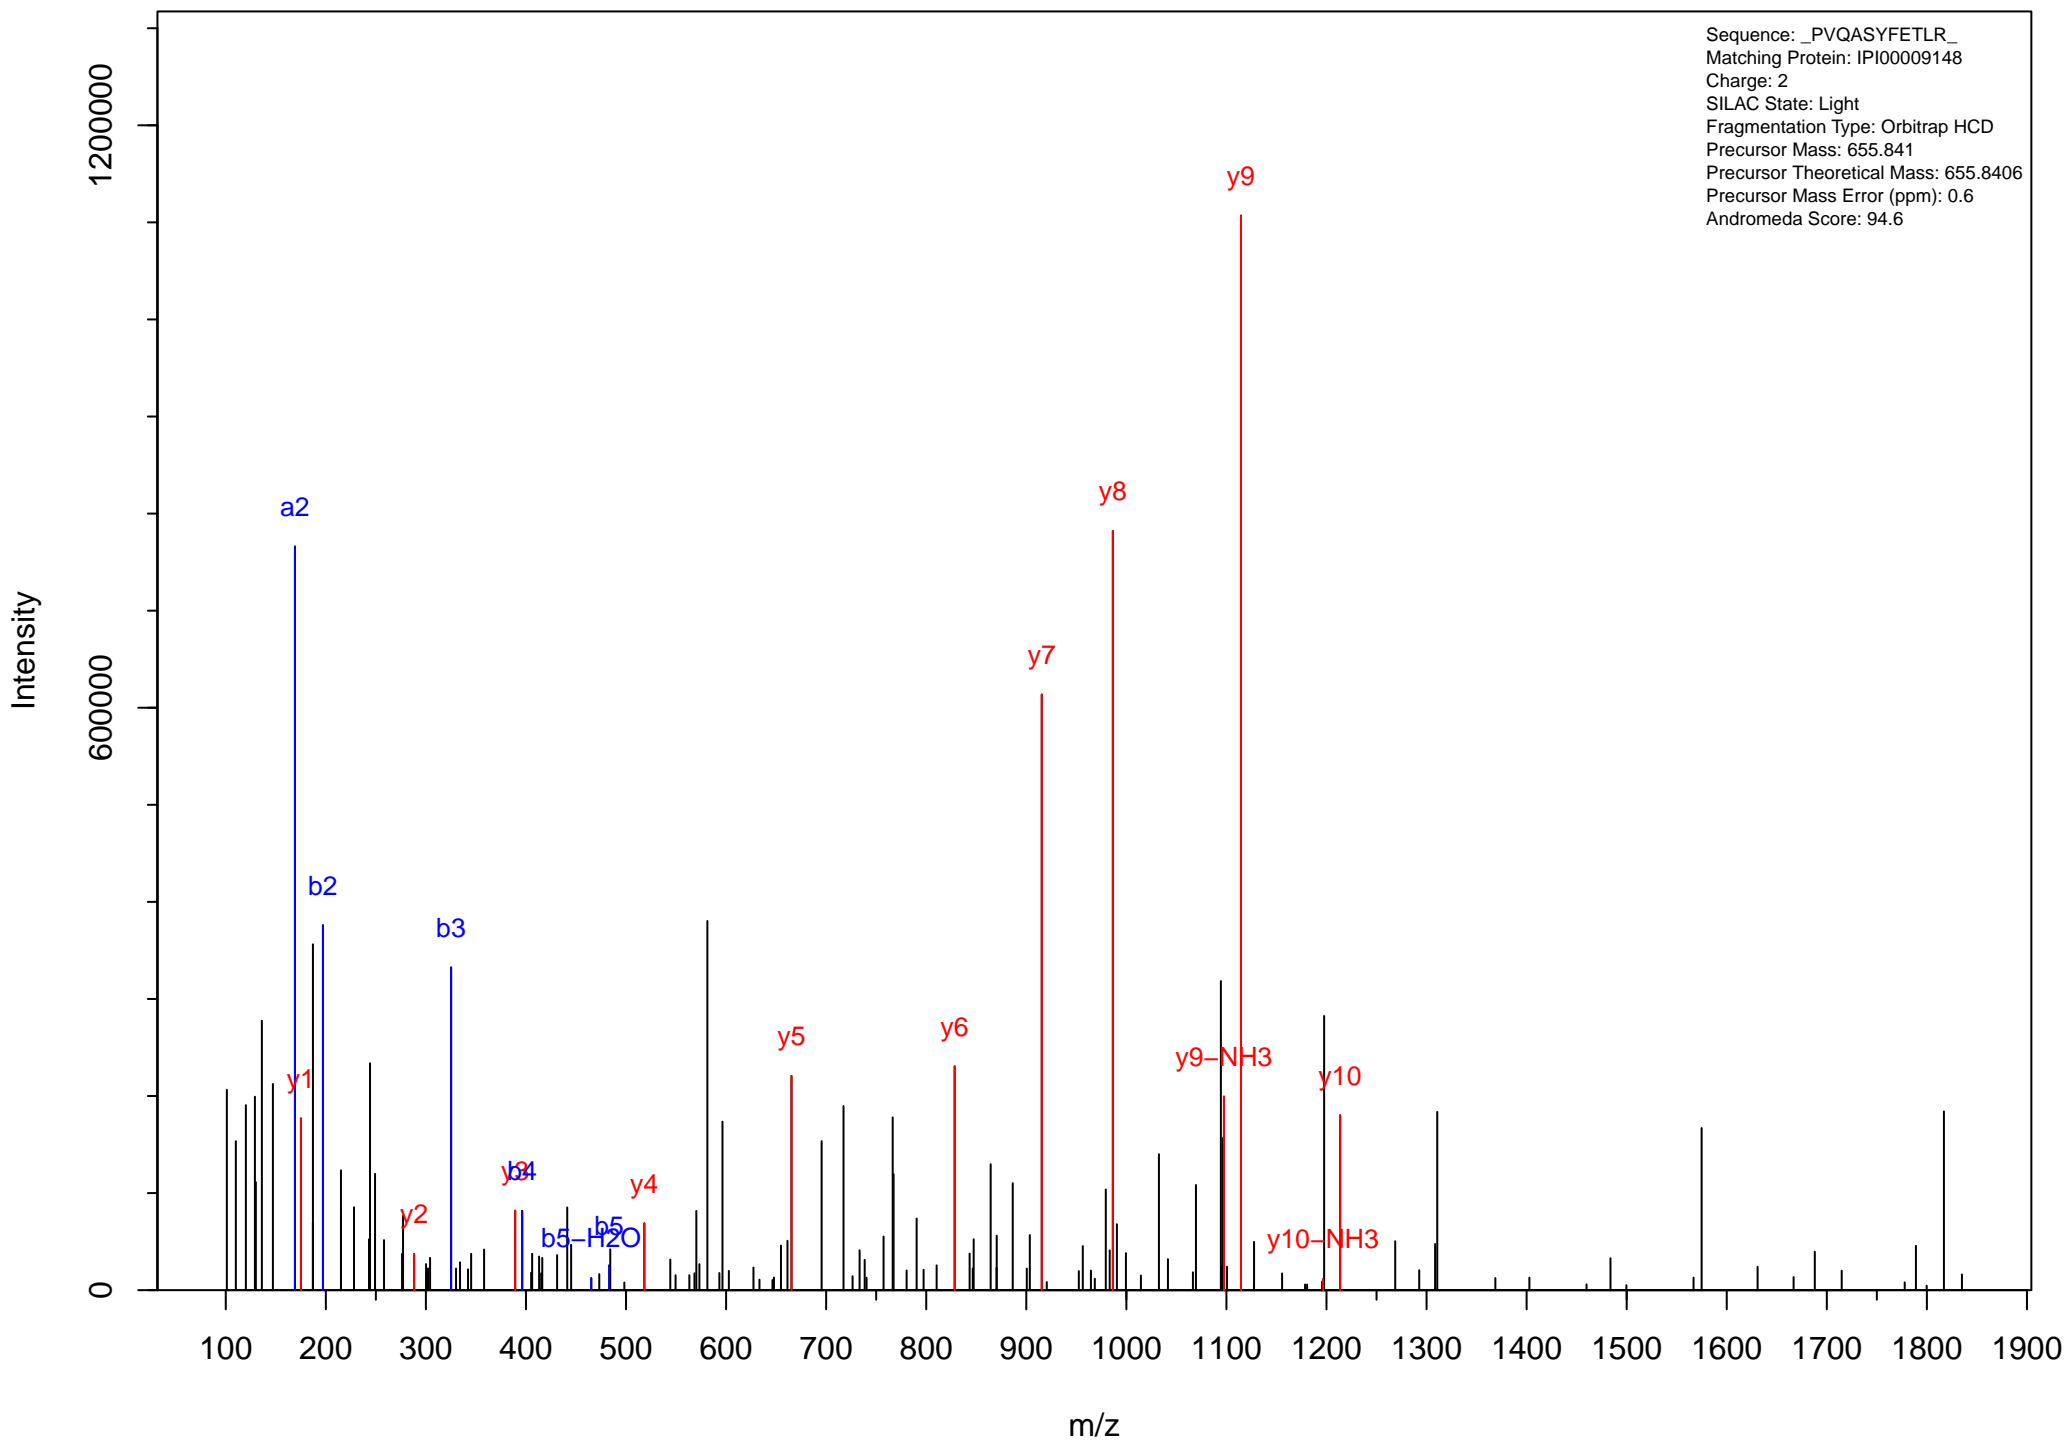

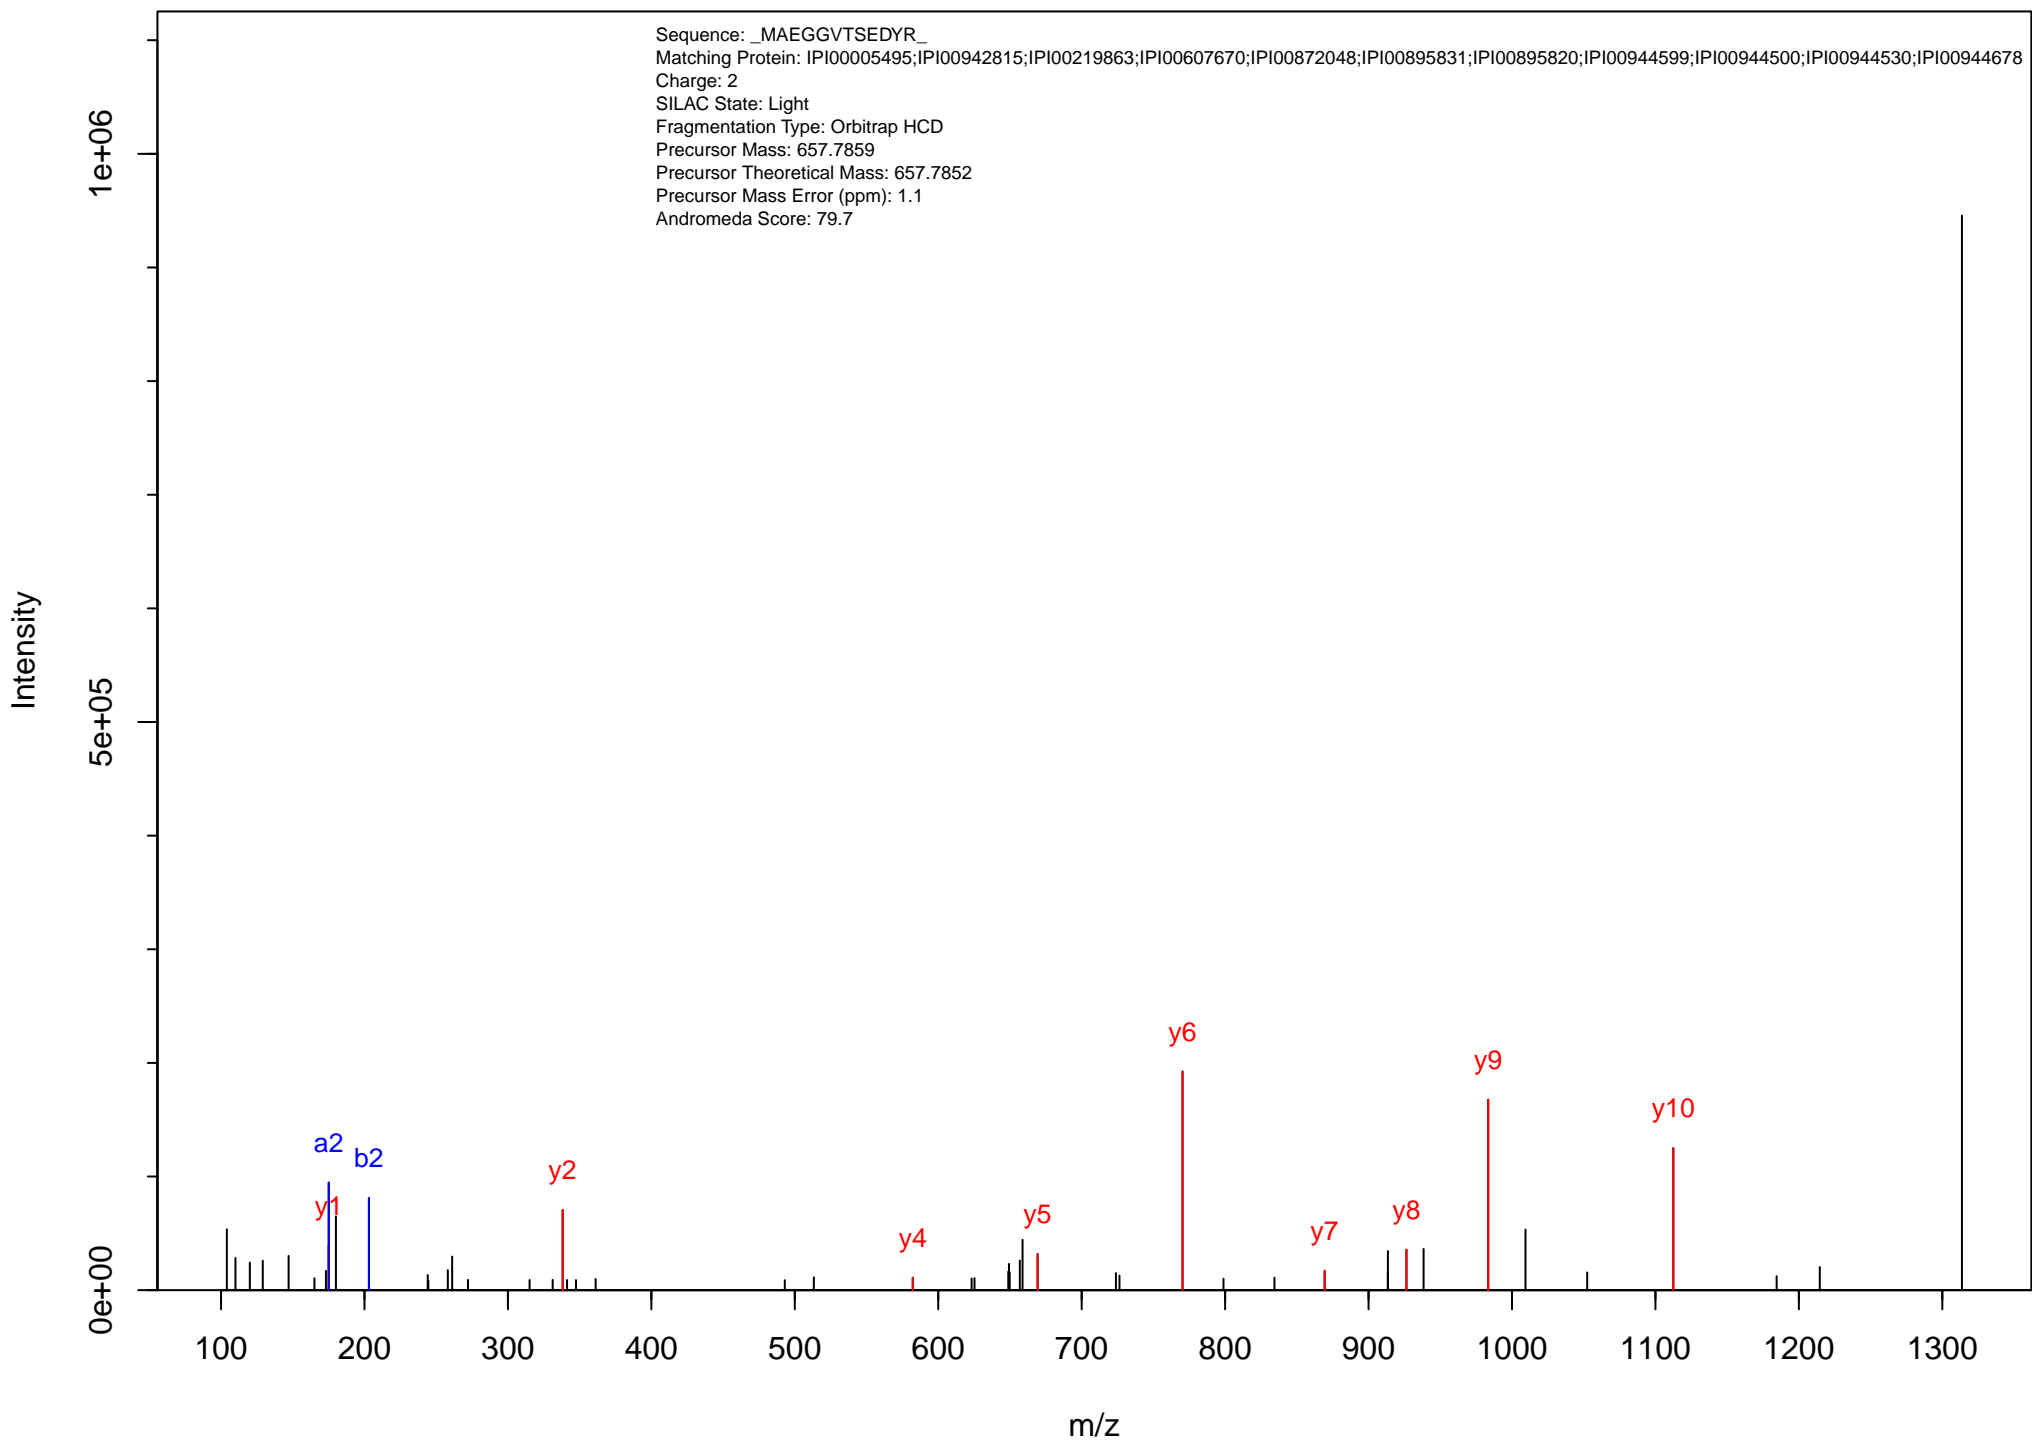

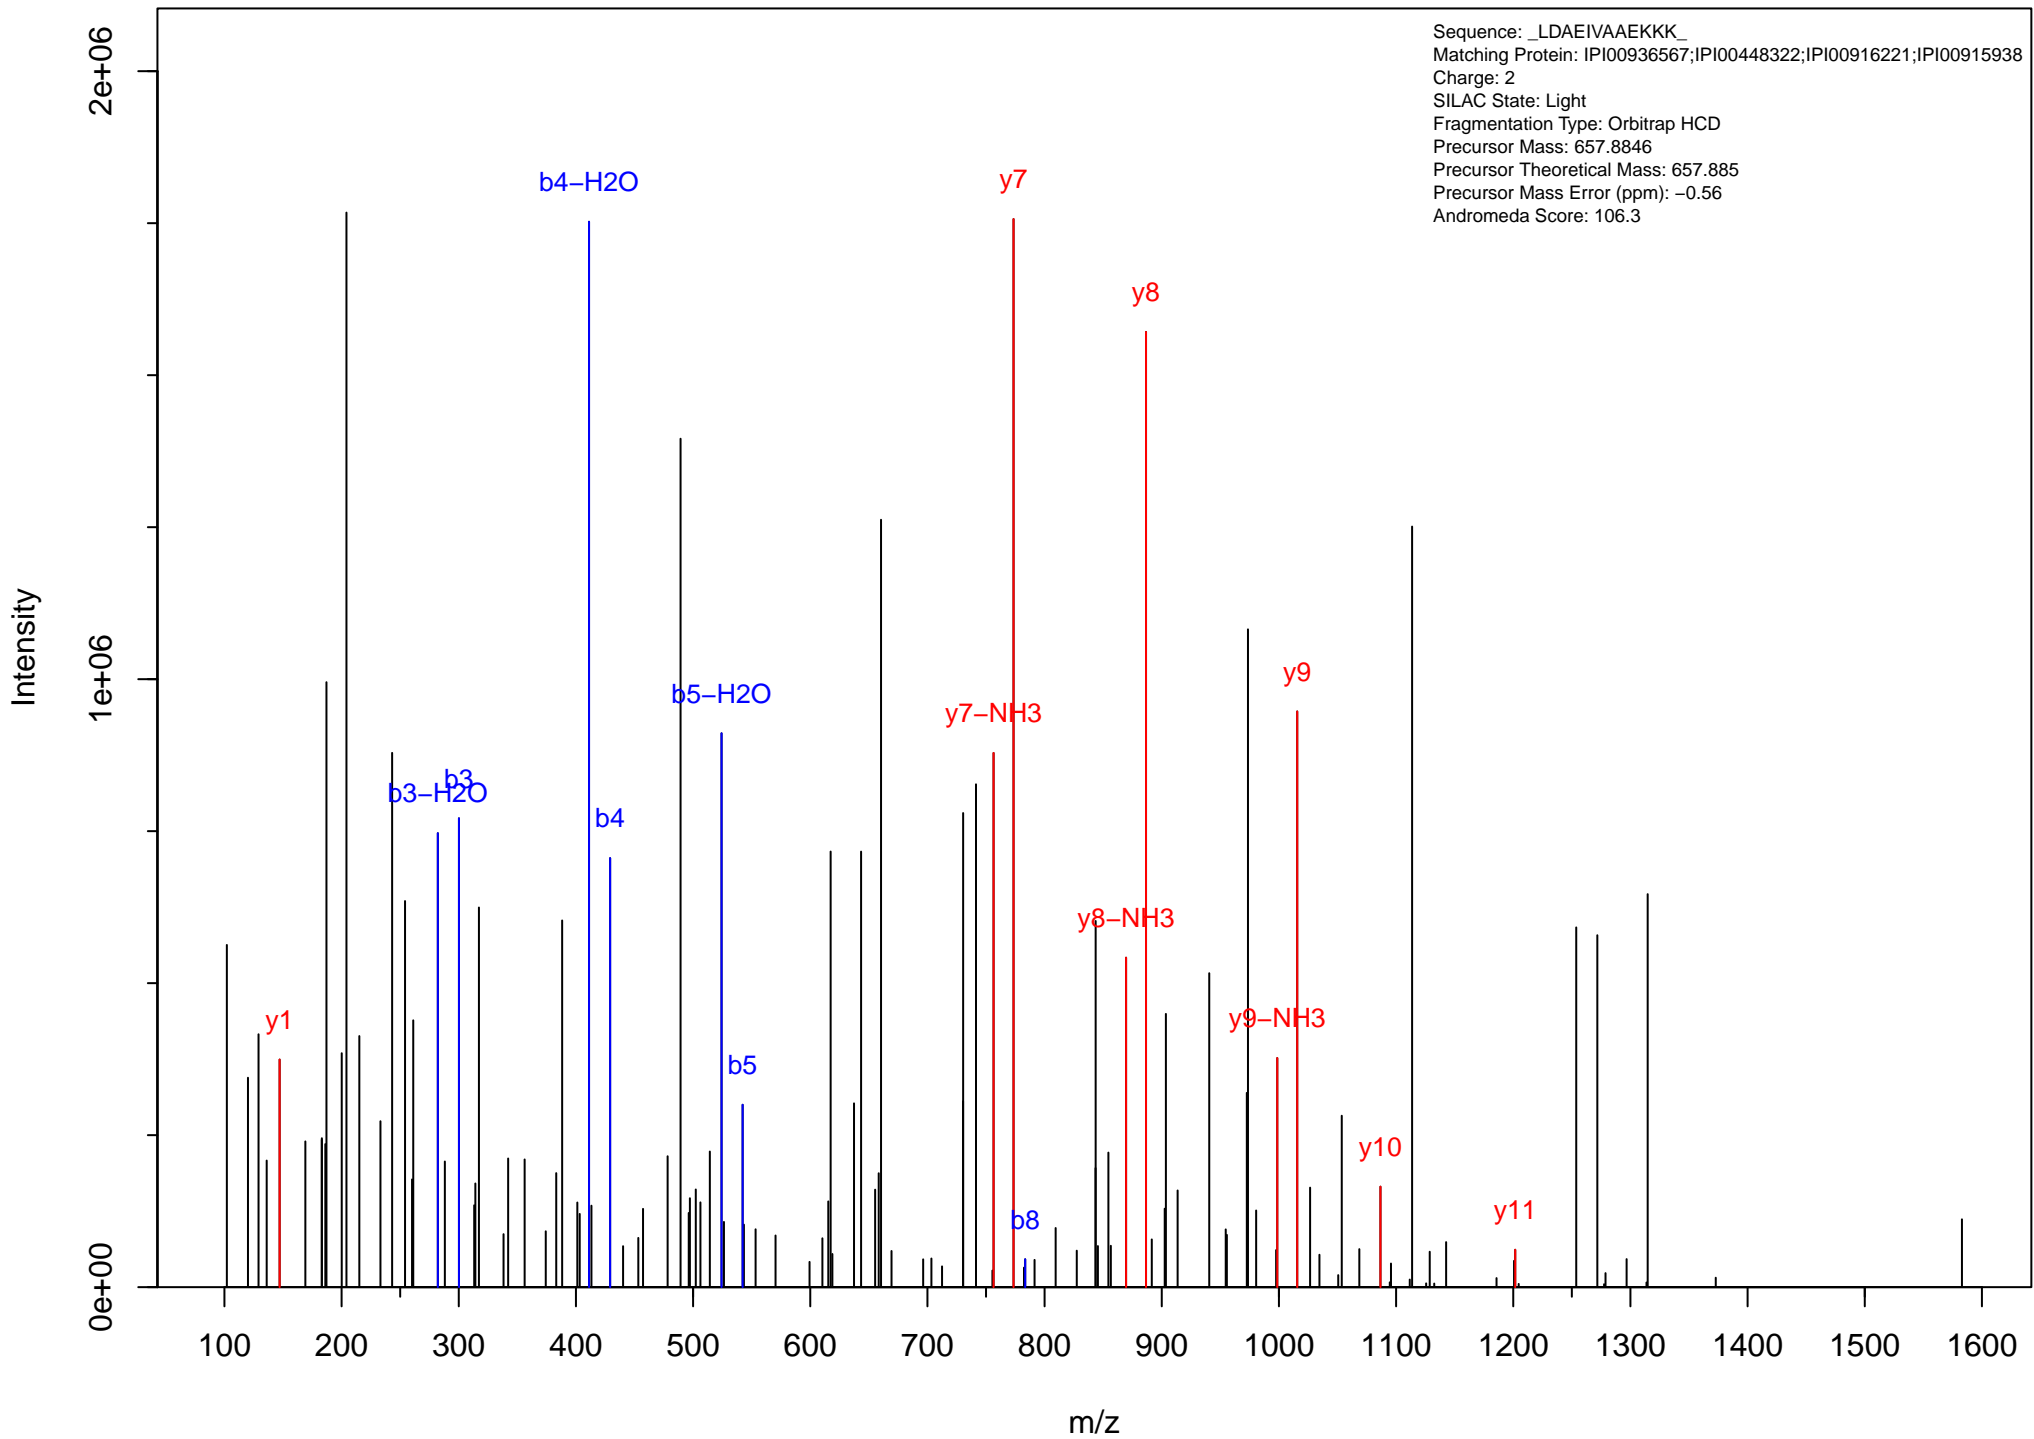

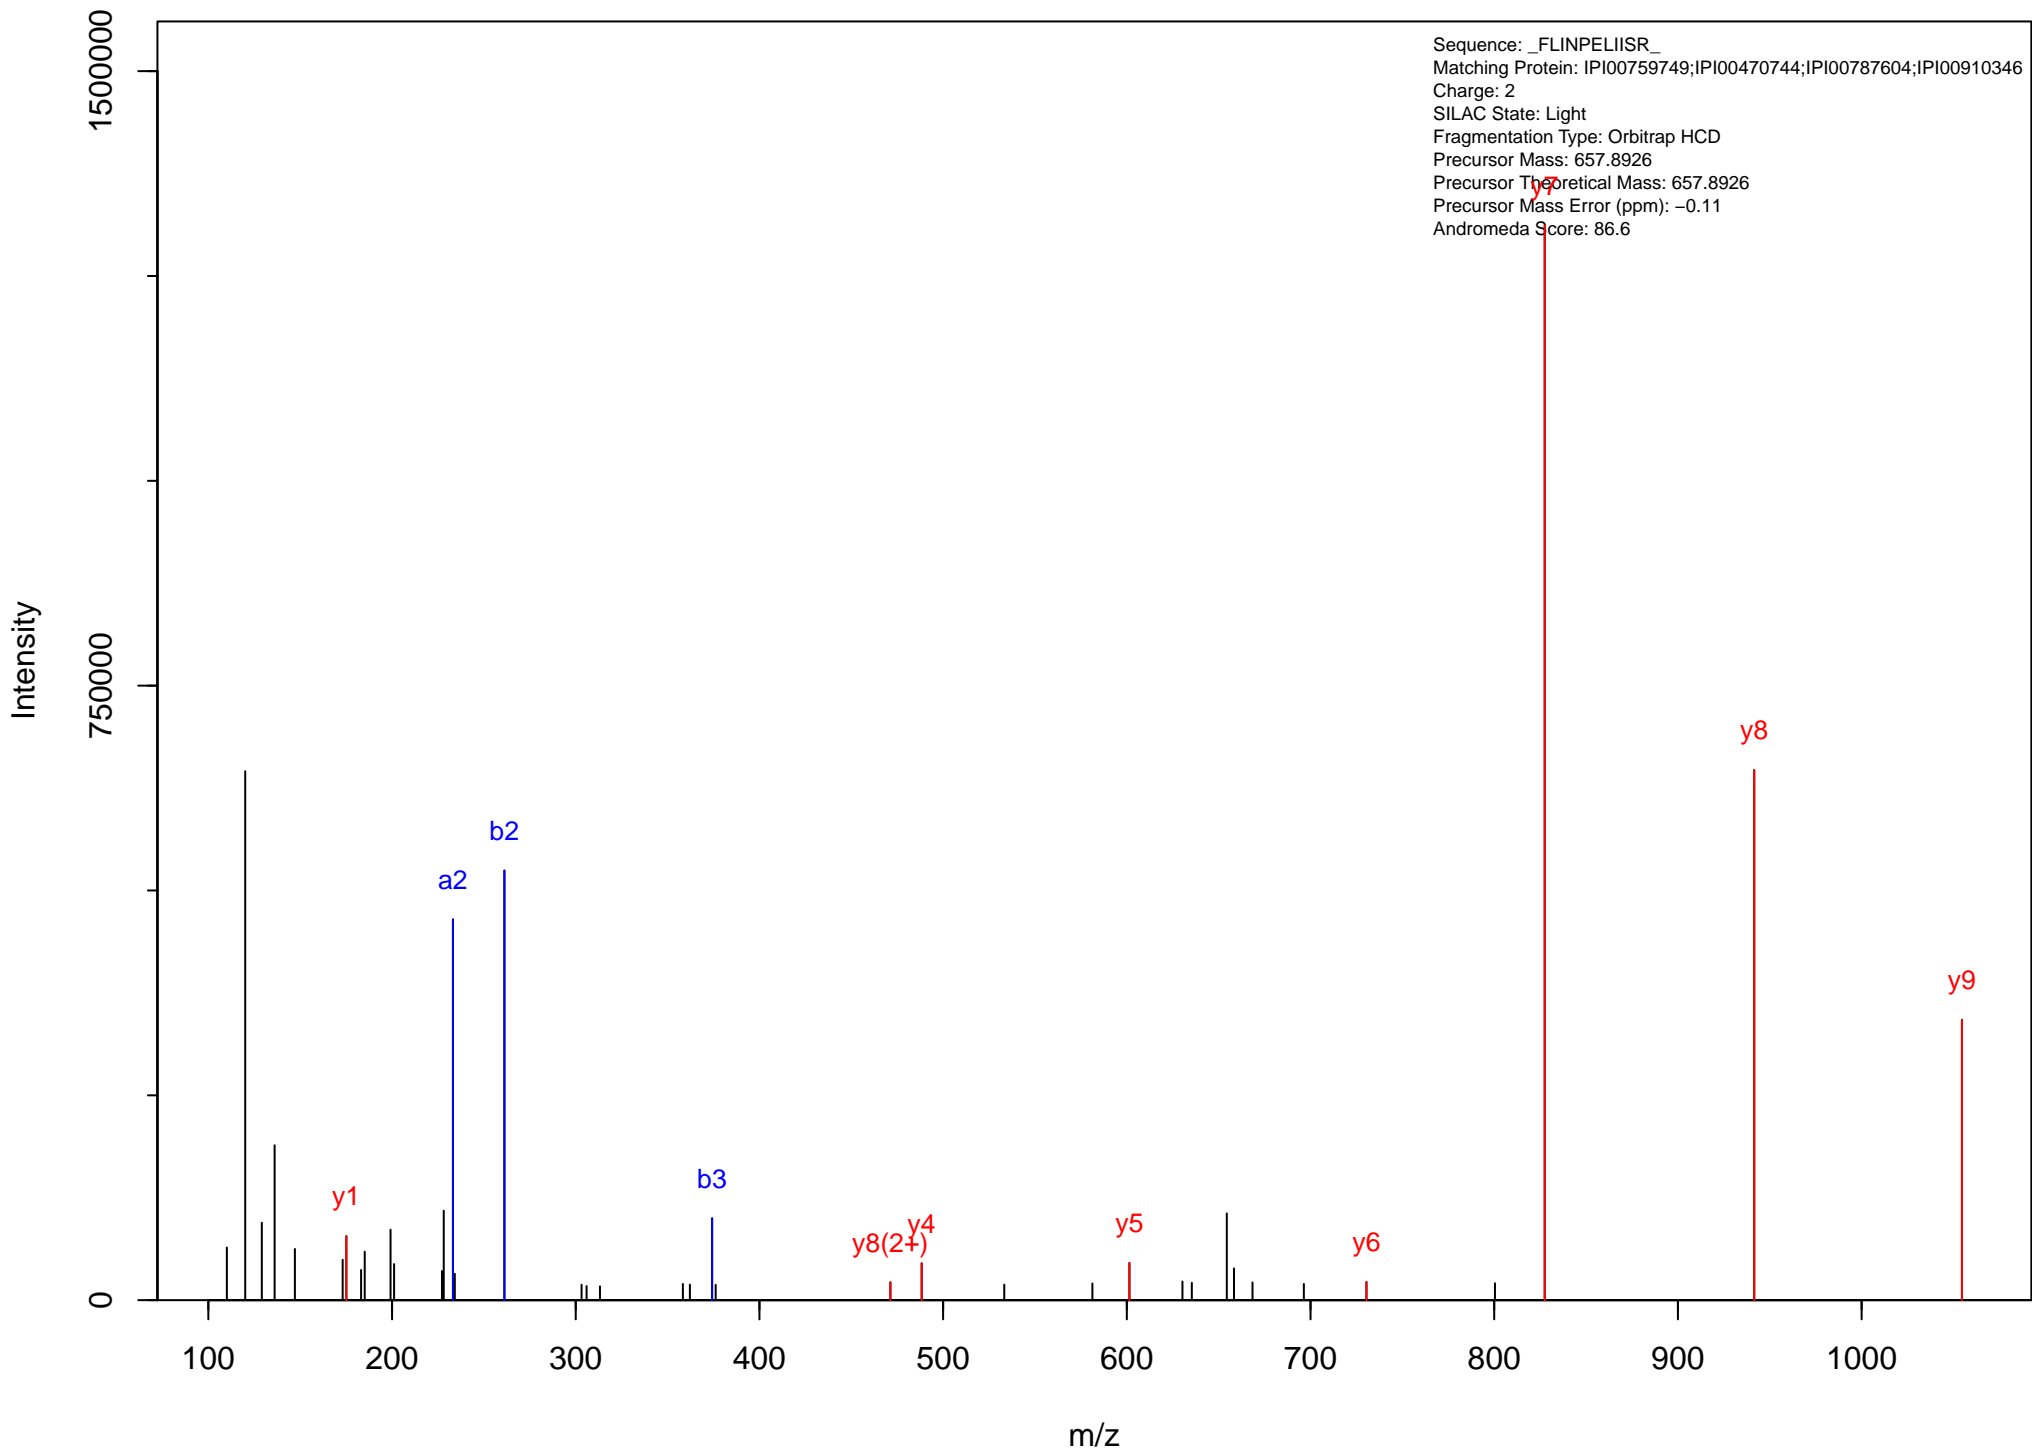

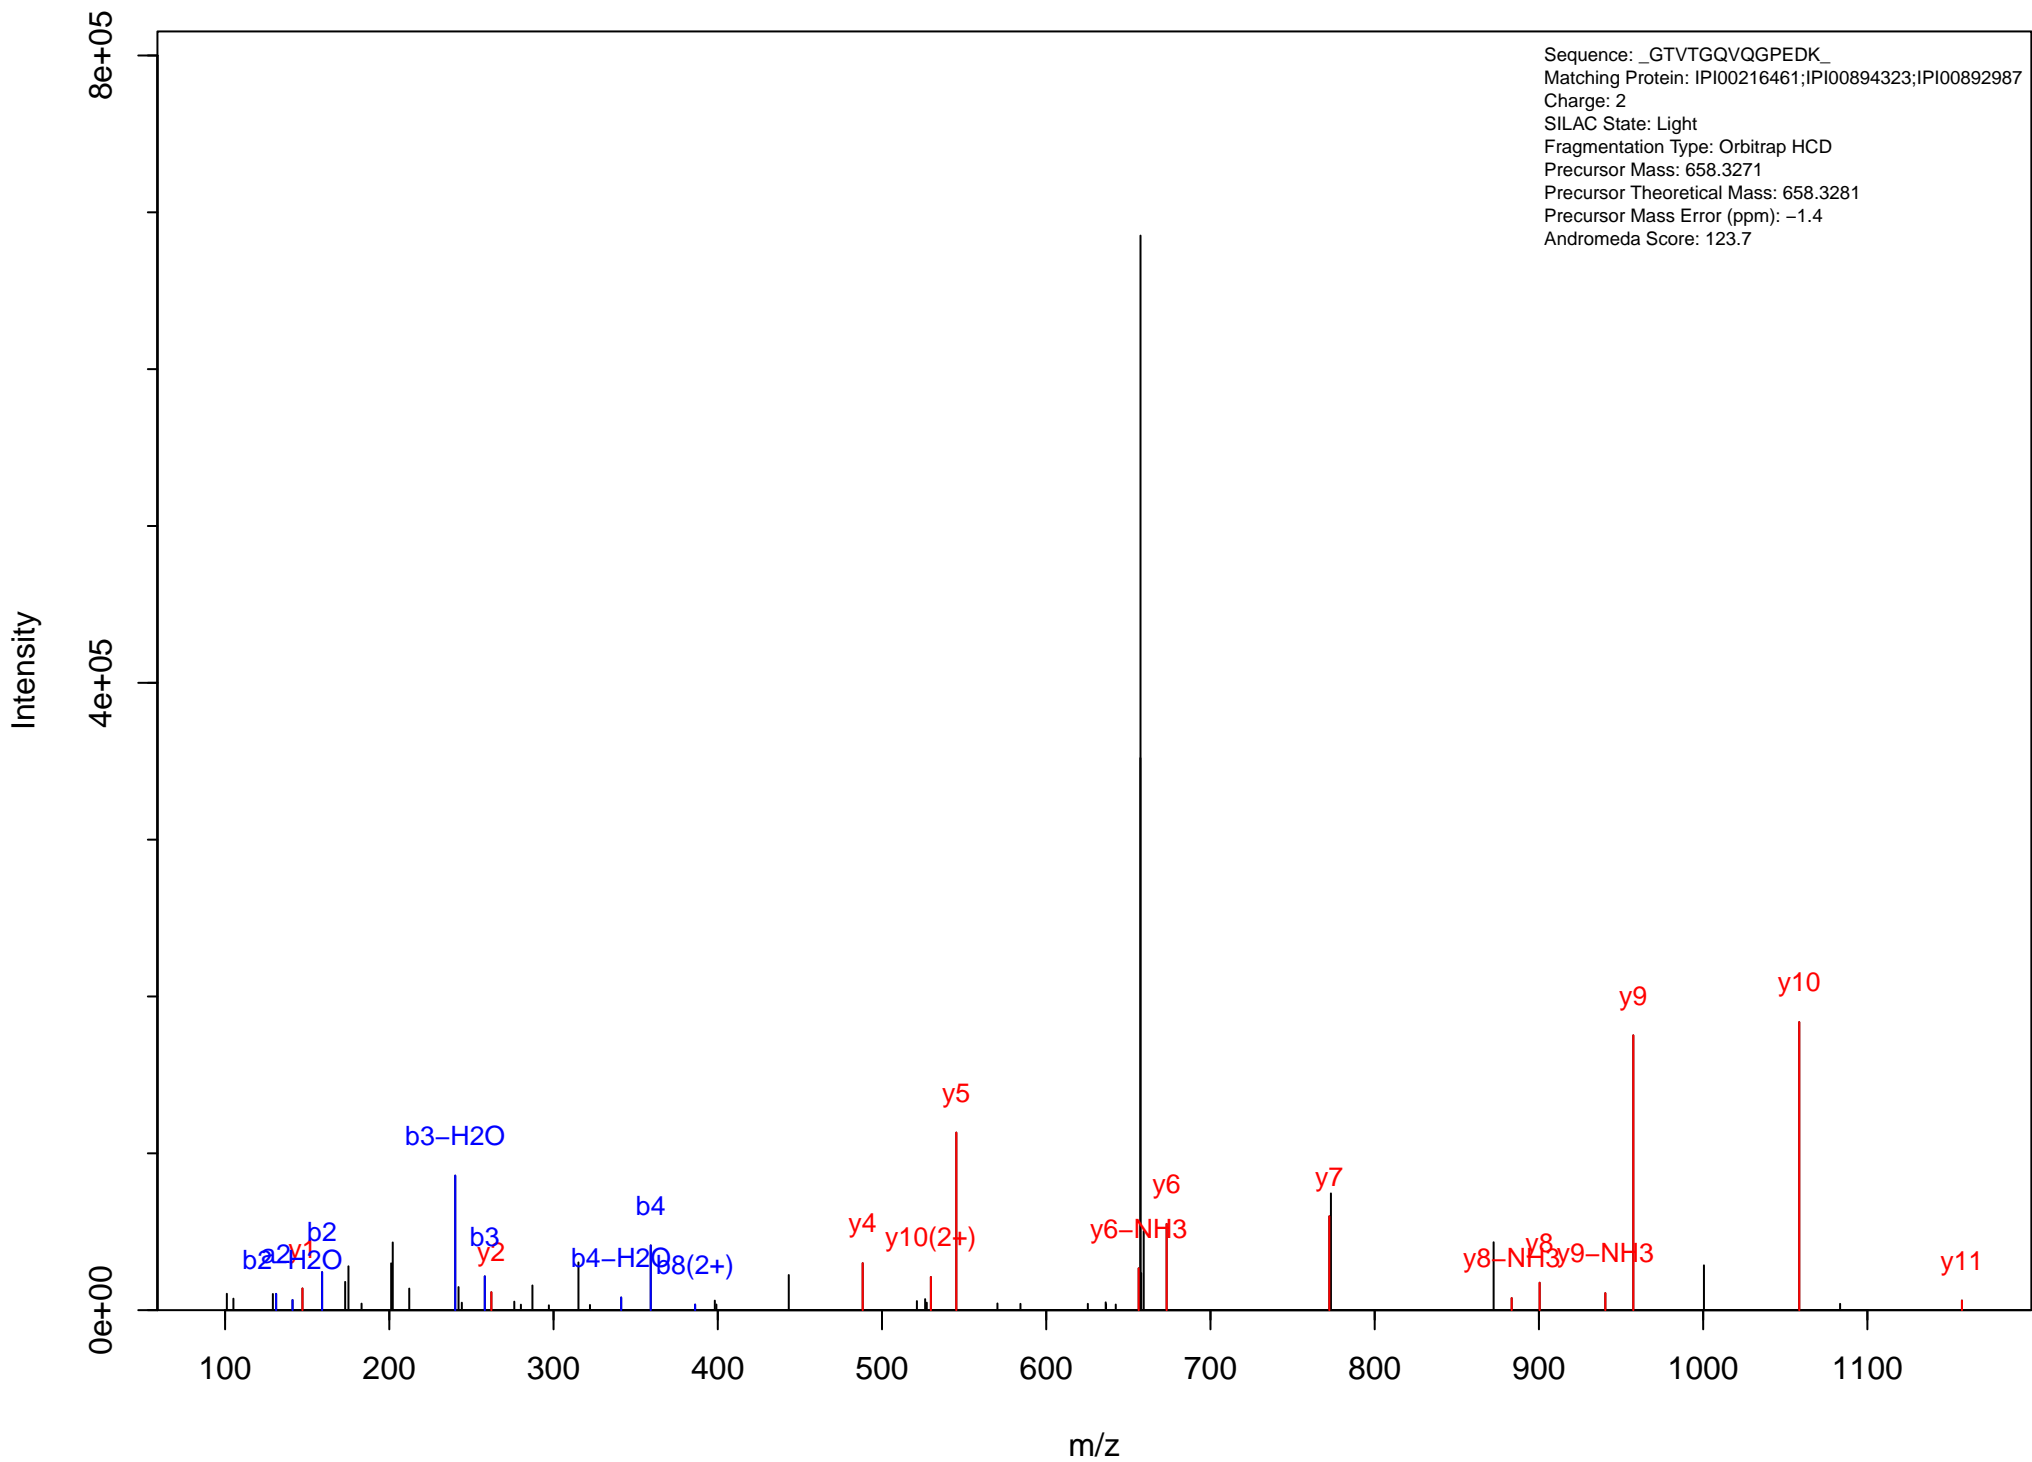

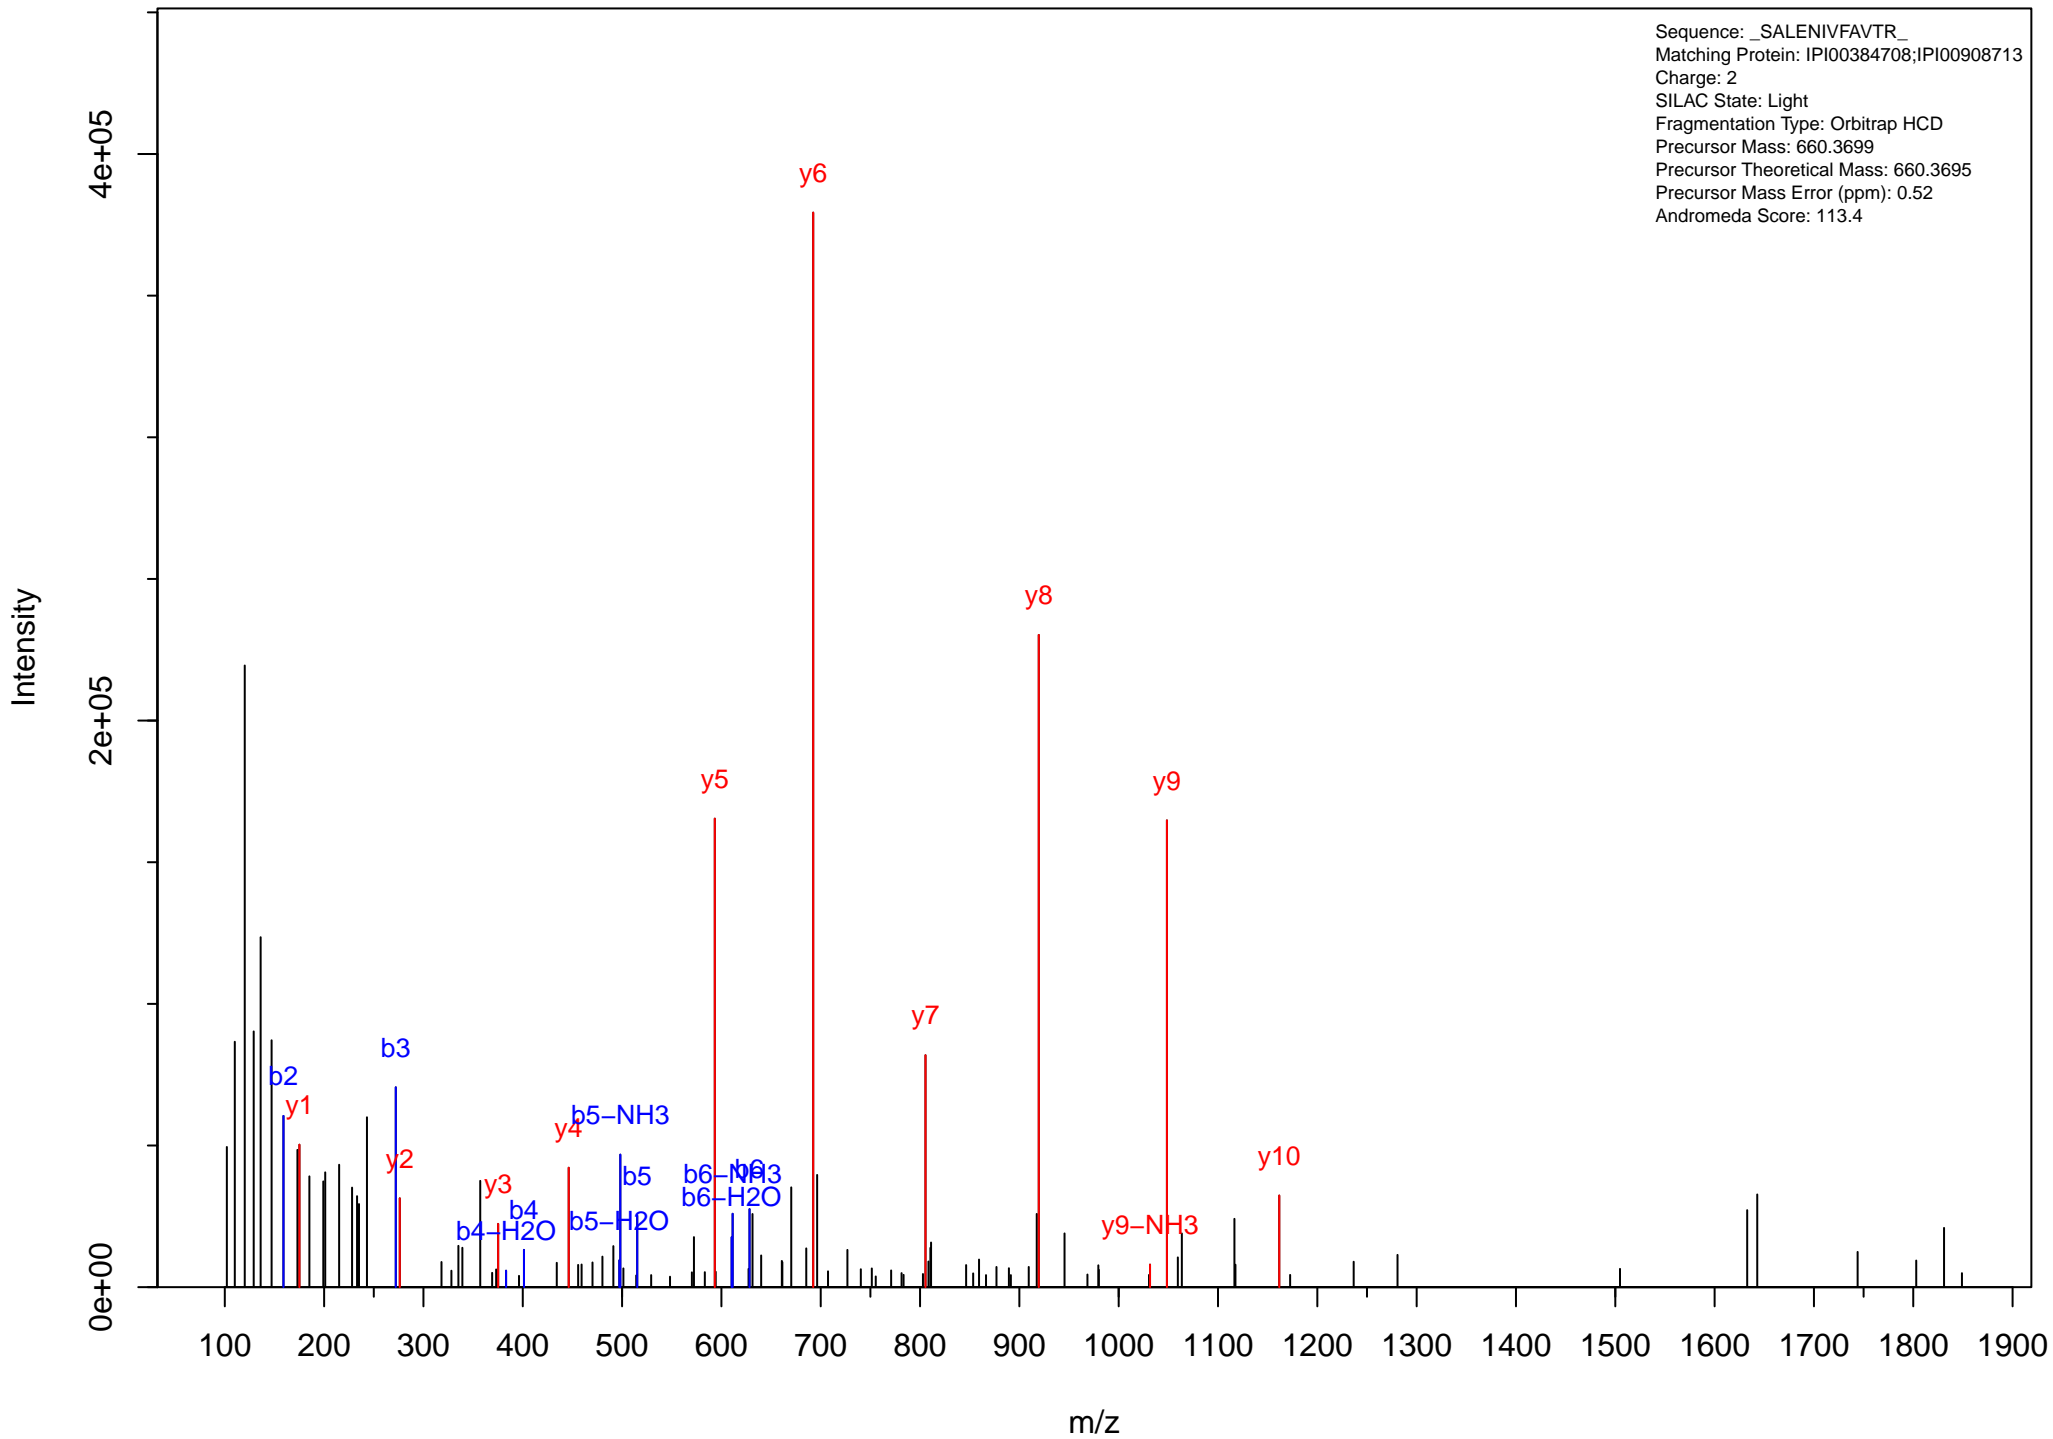

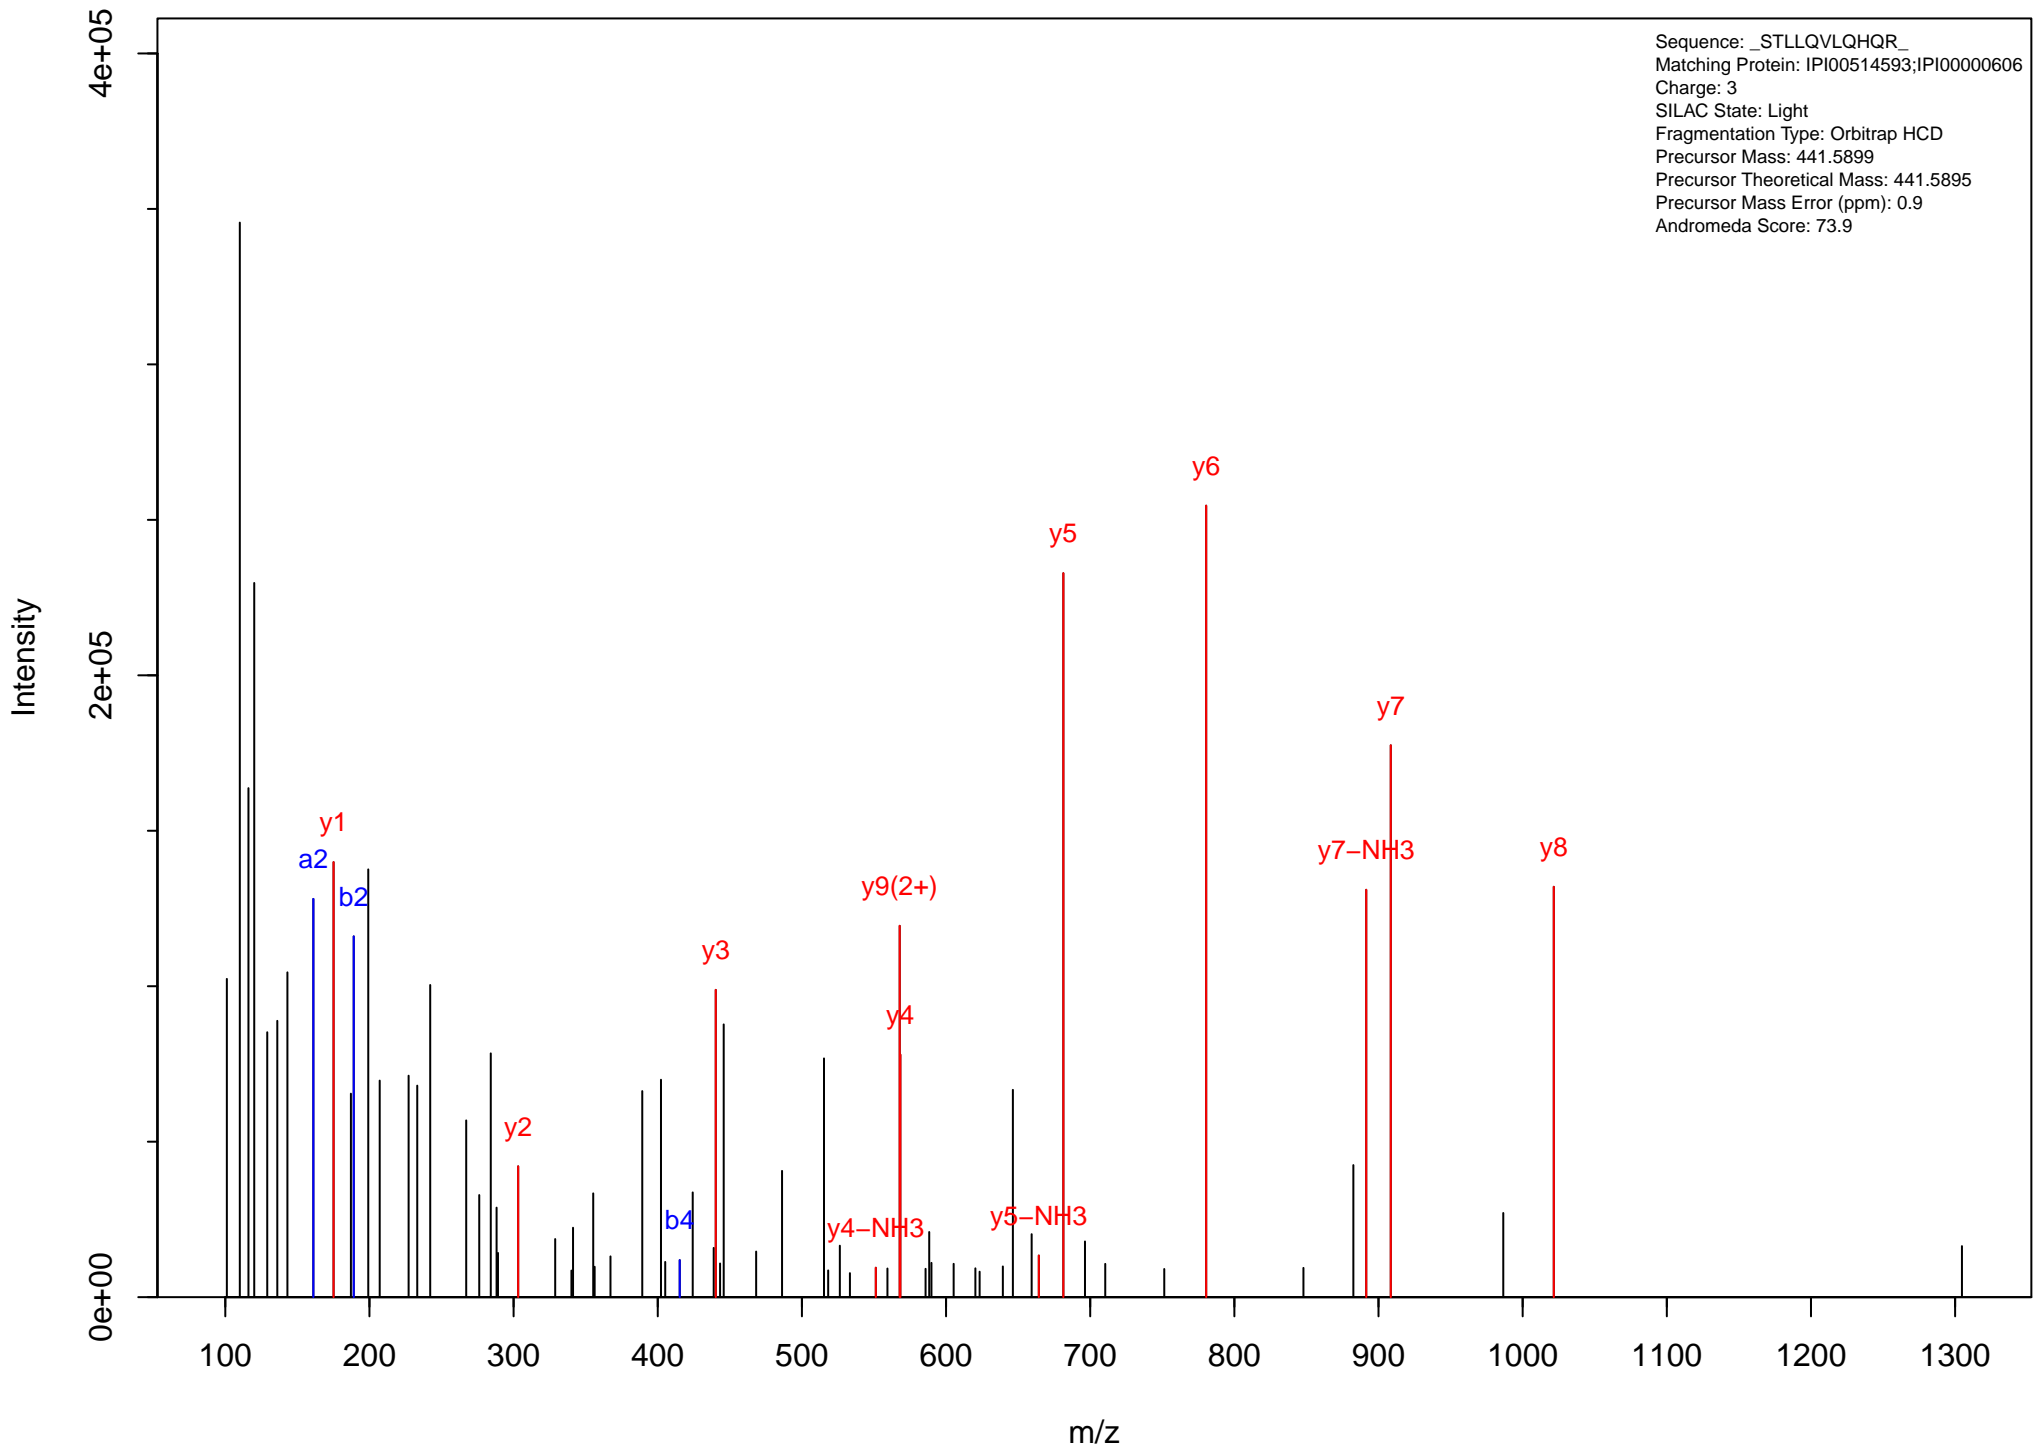

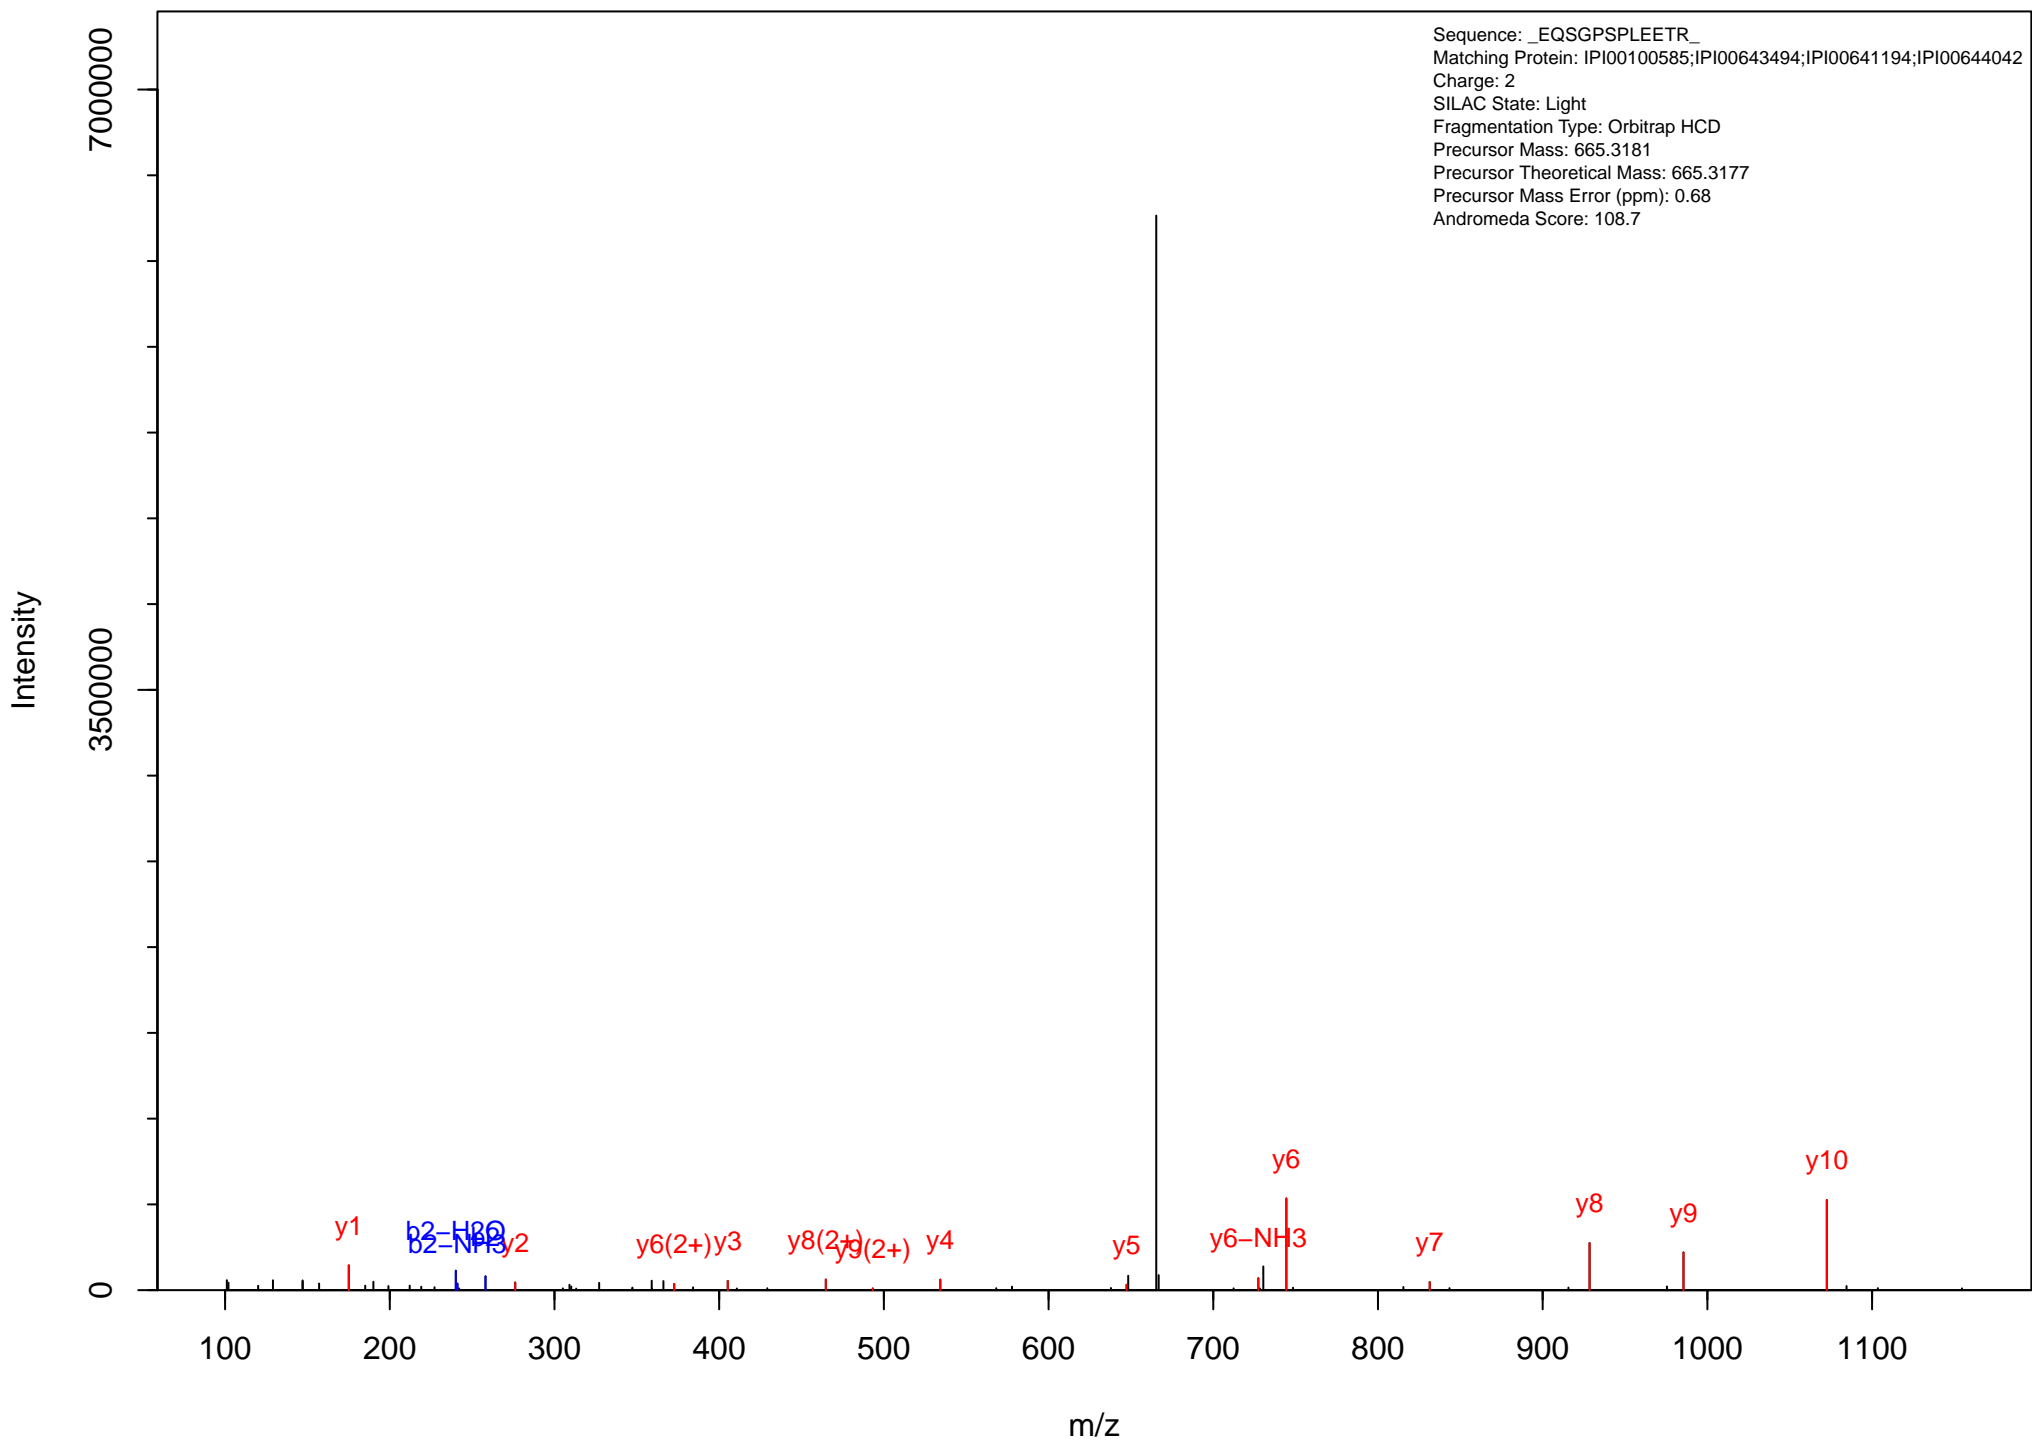

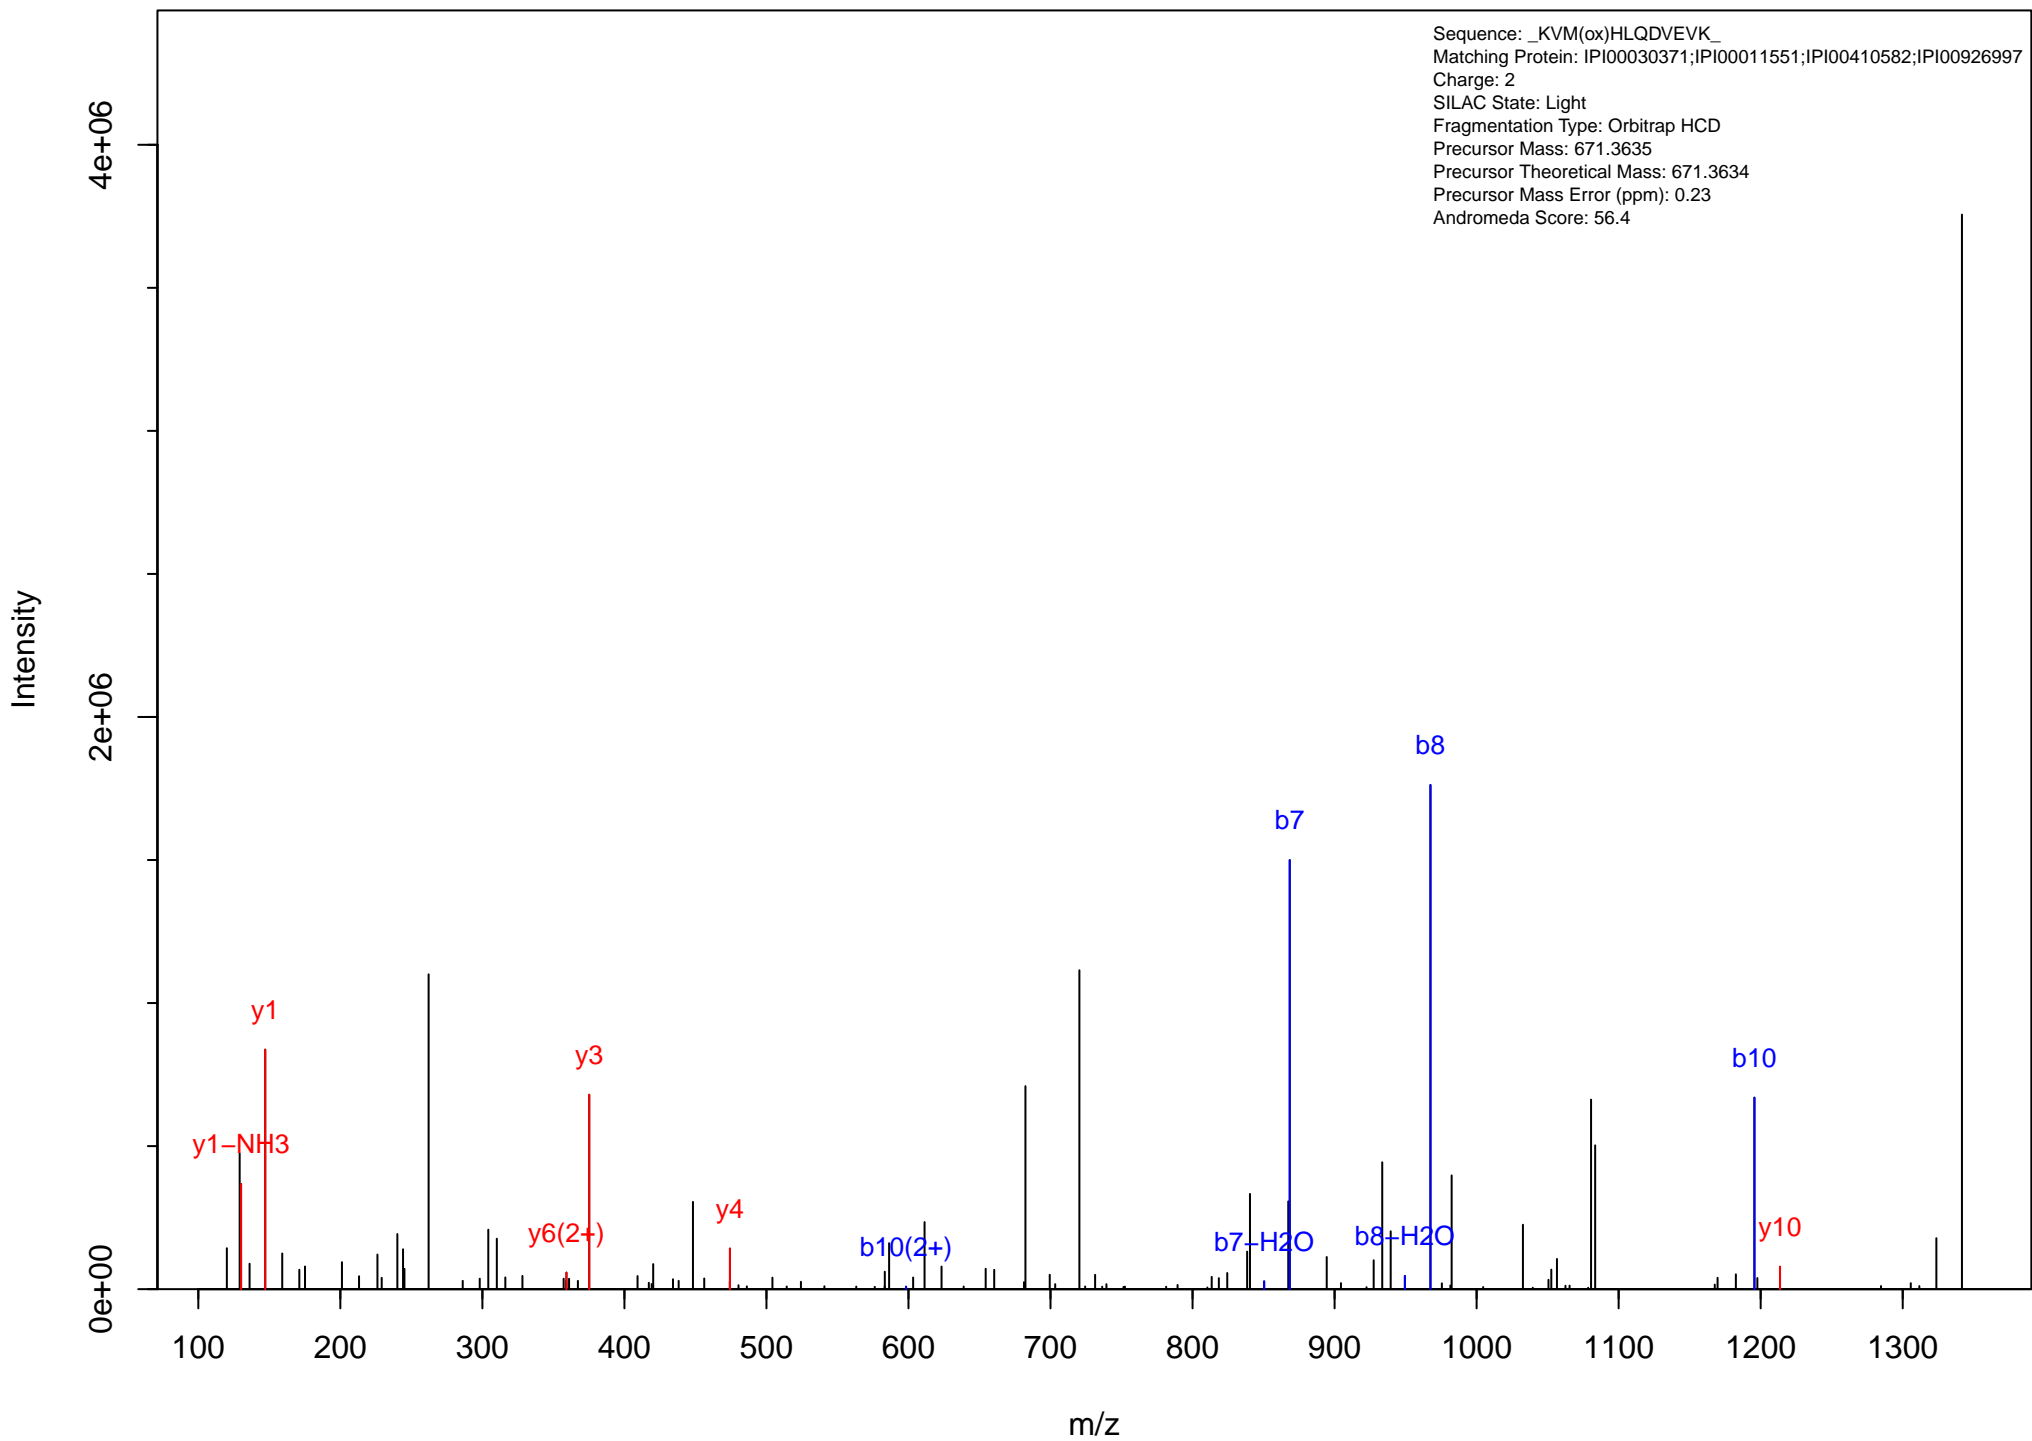

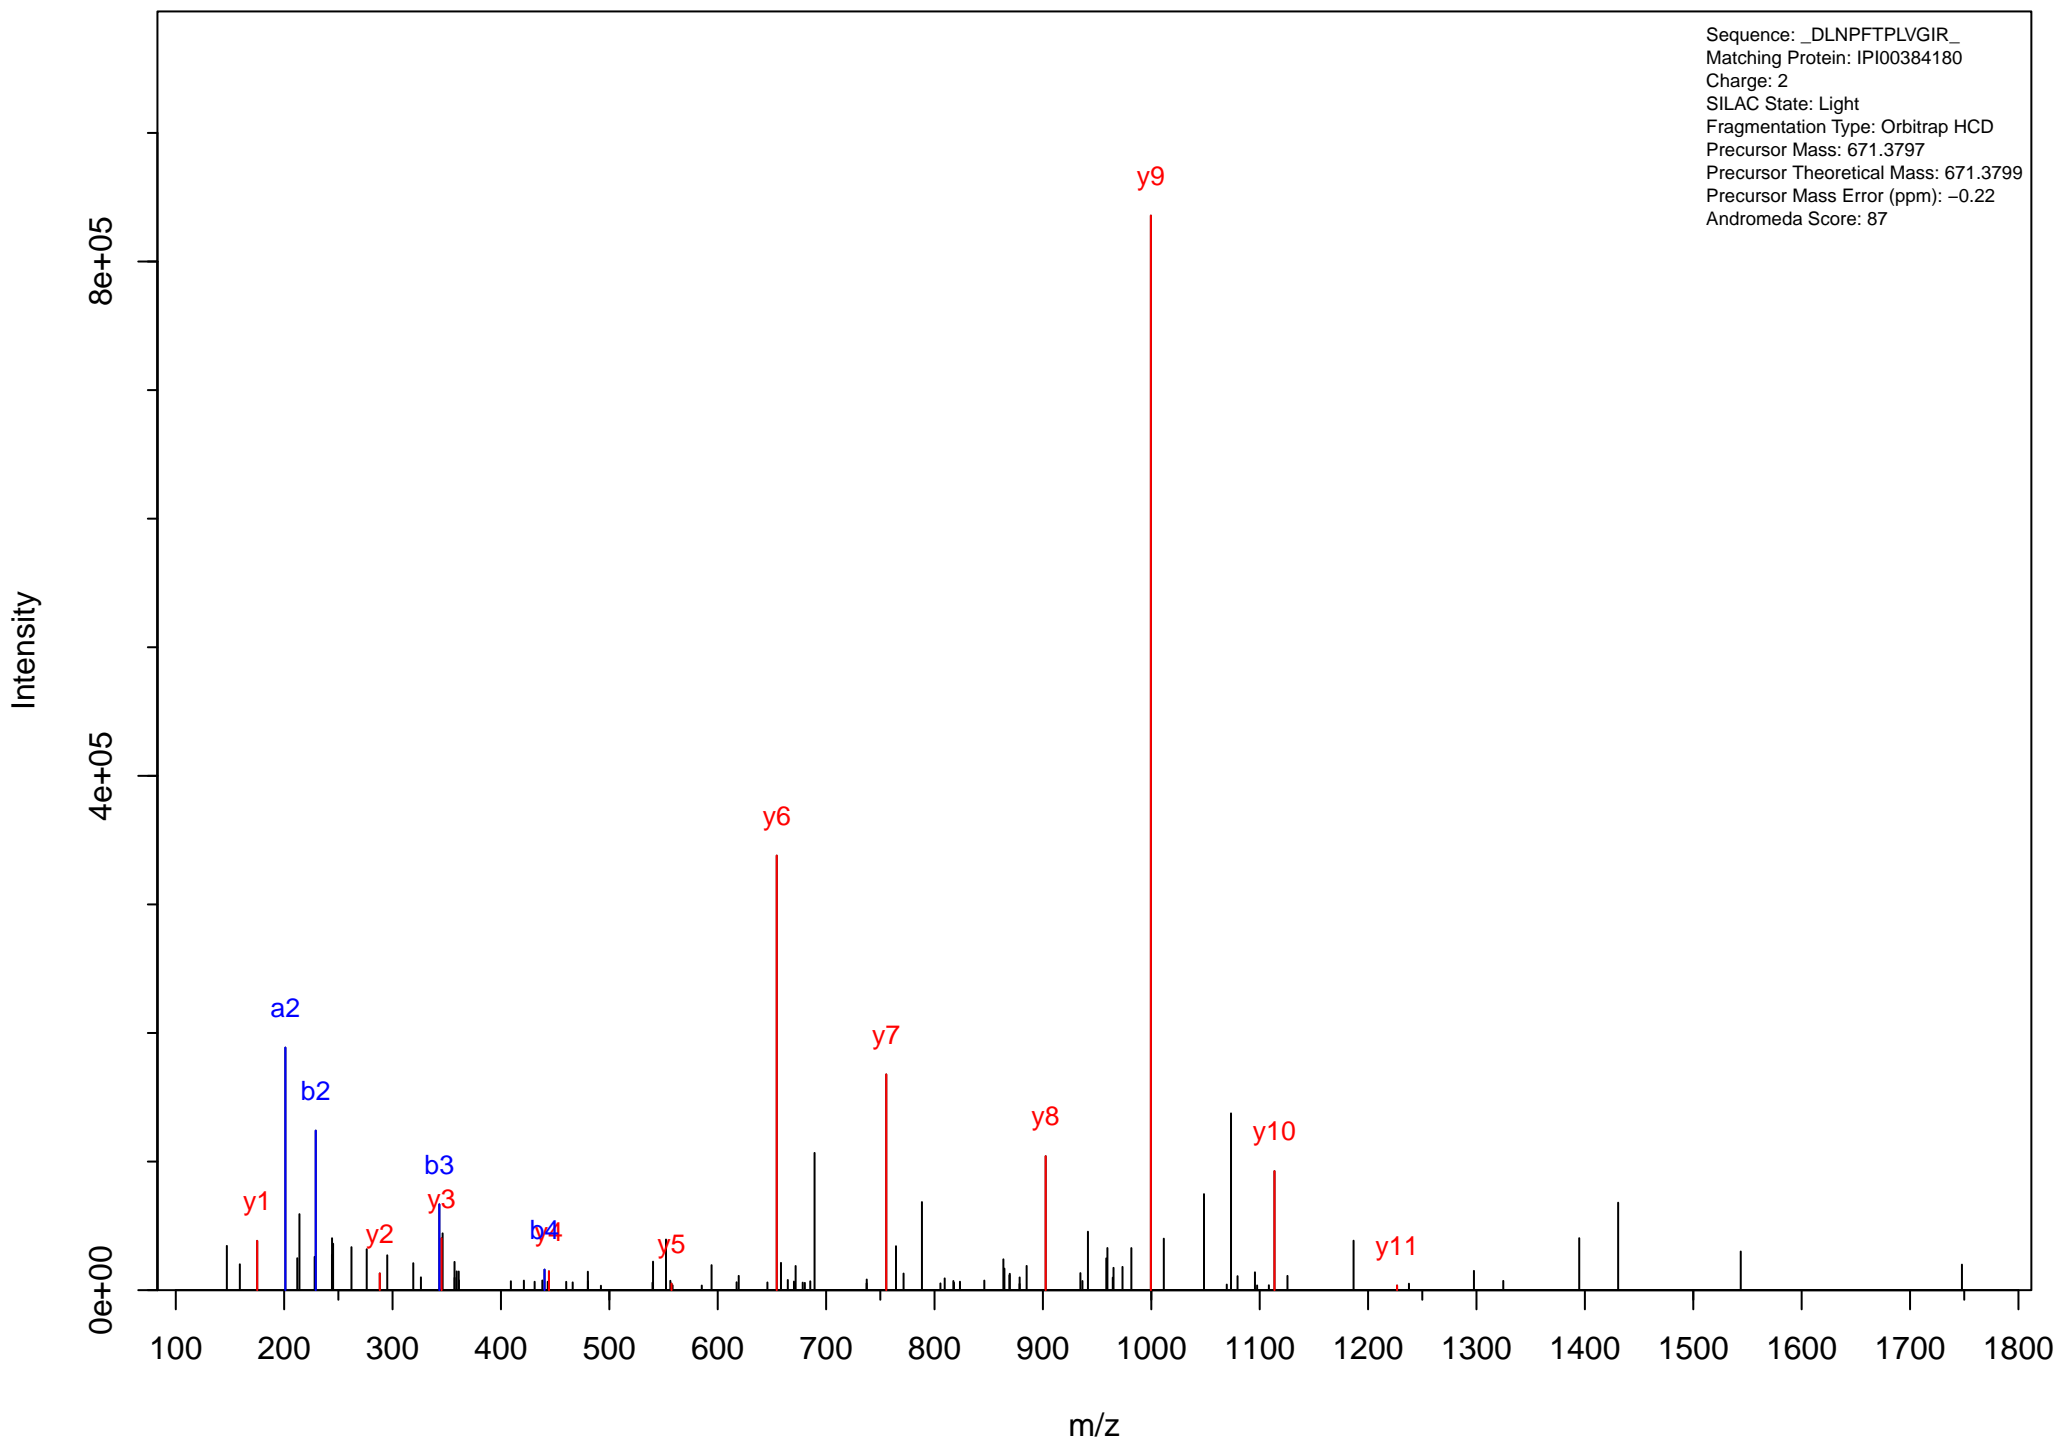

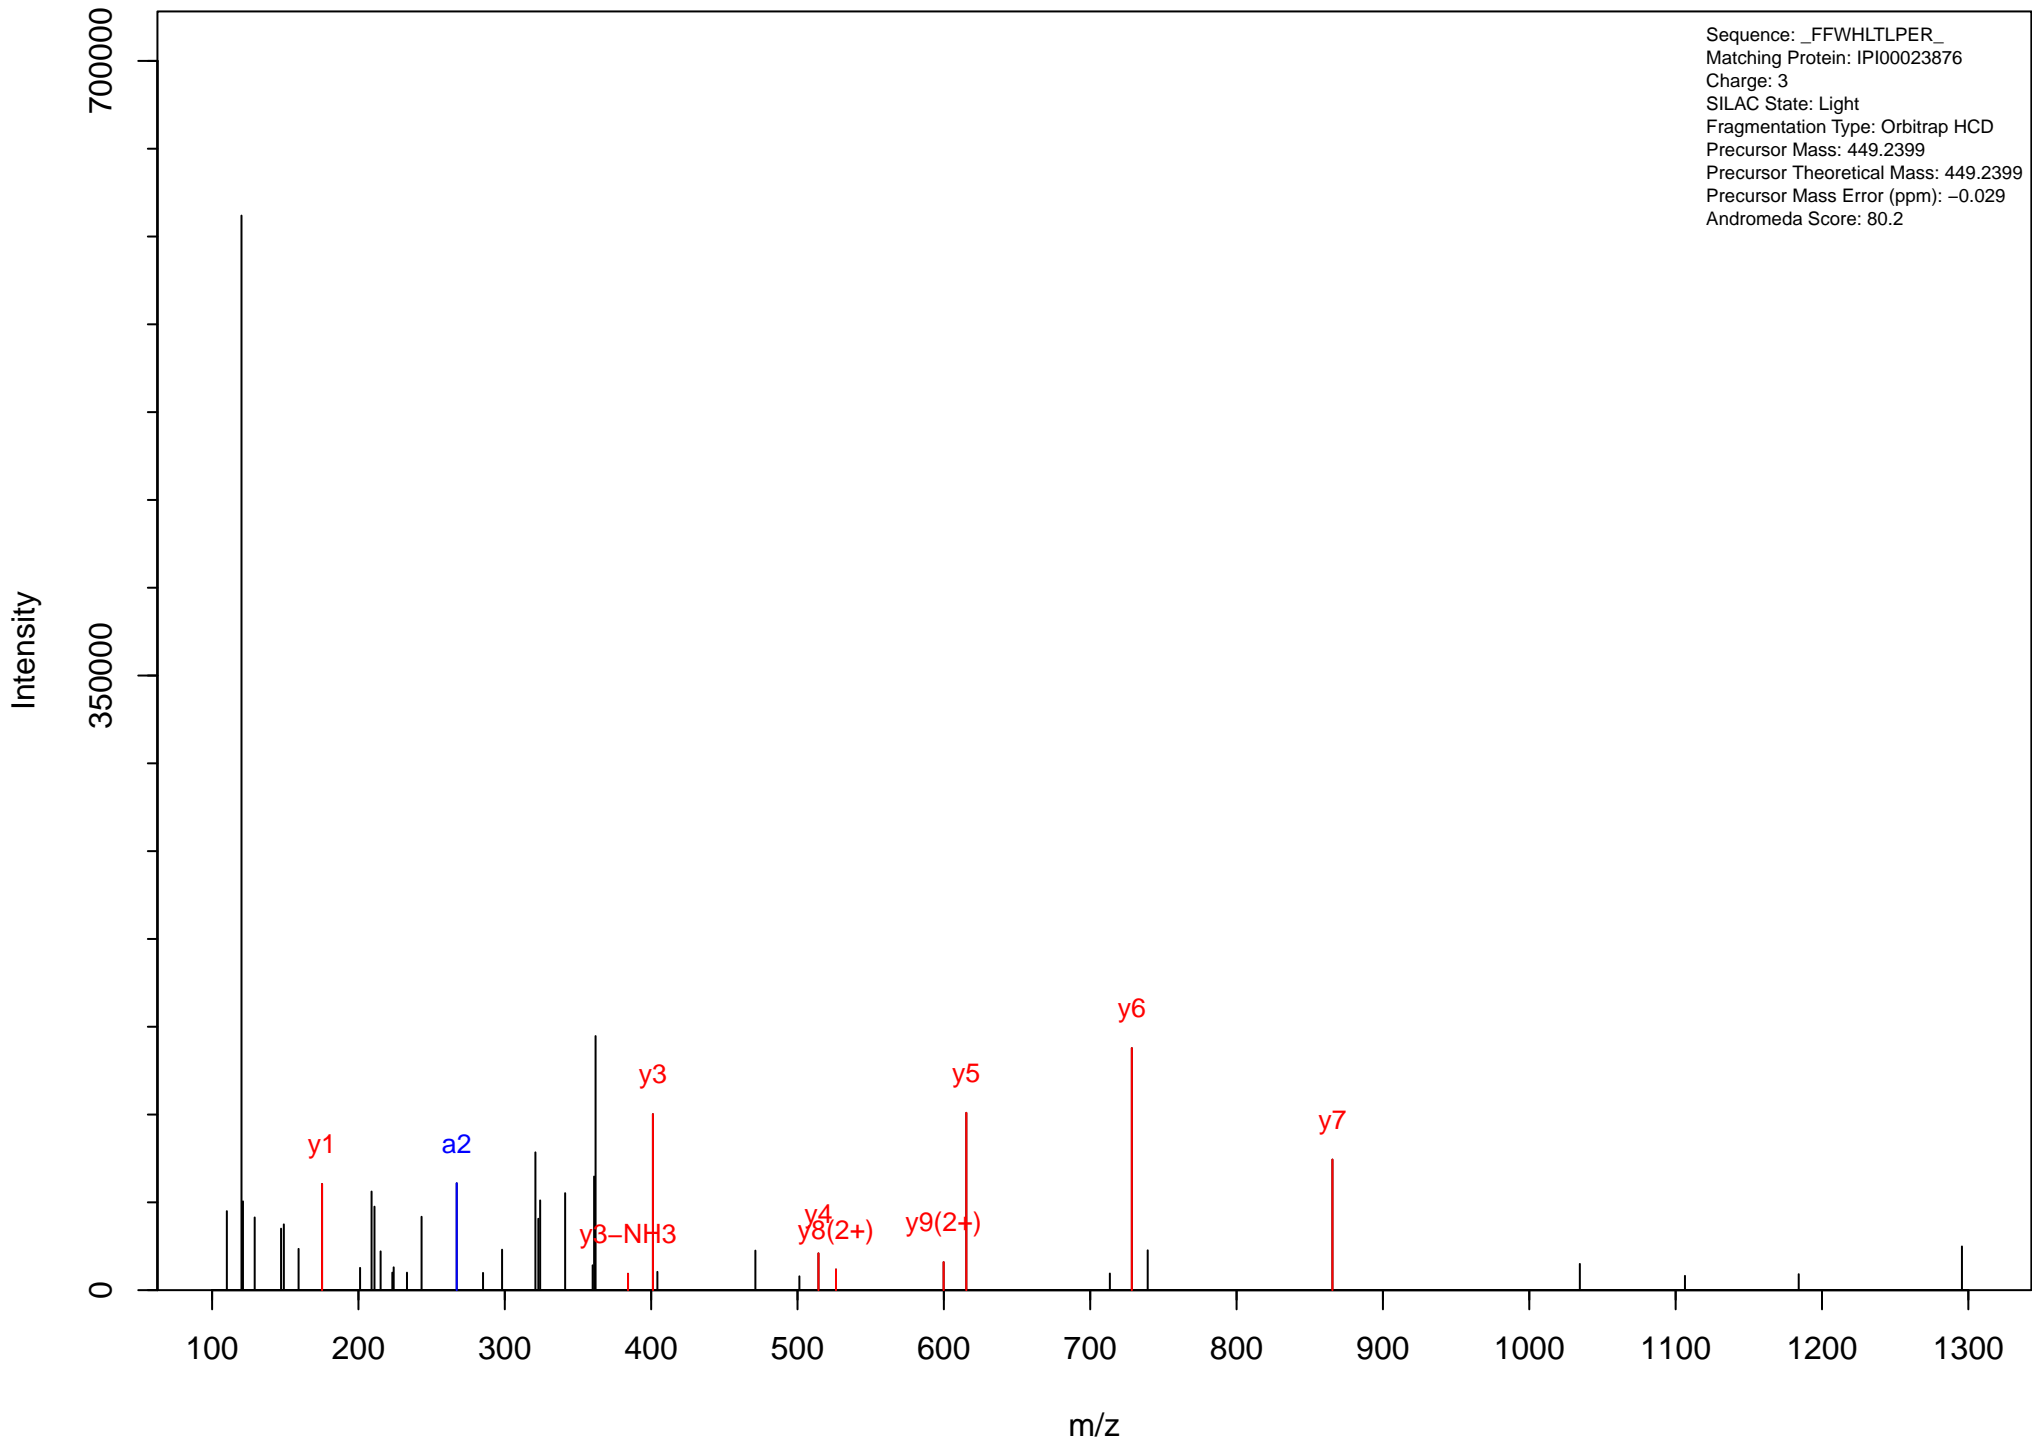

Intensity

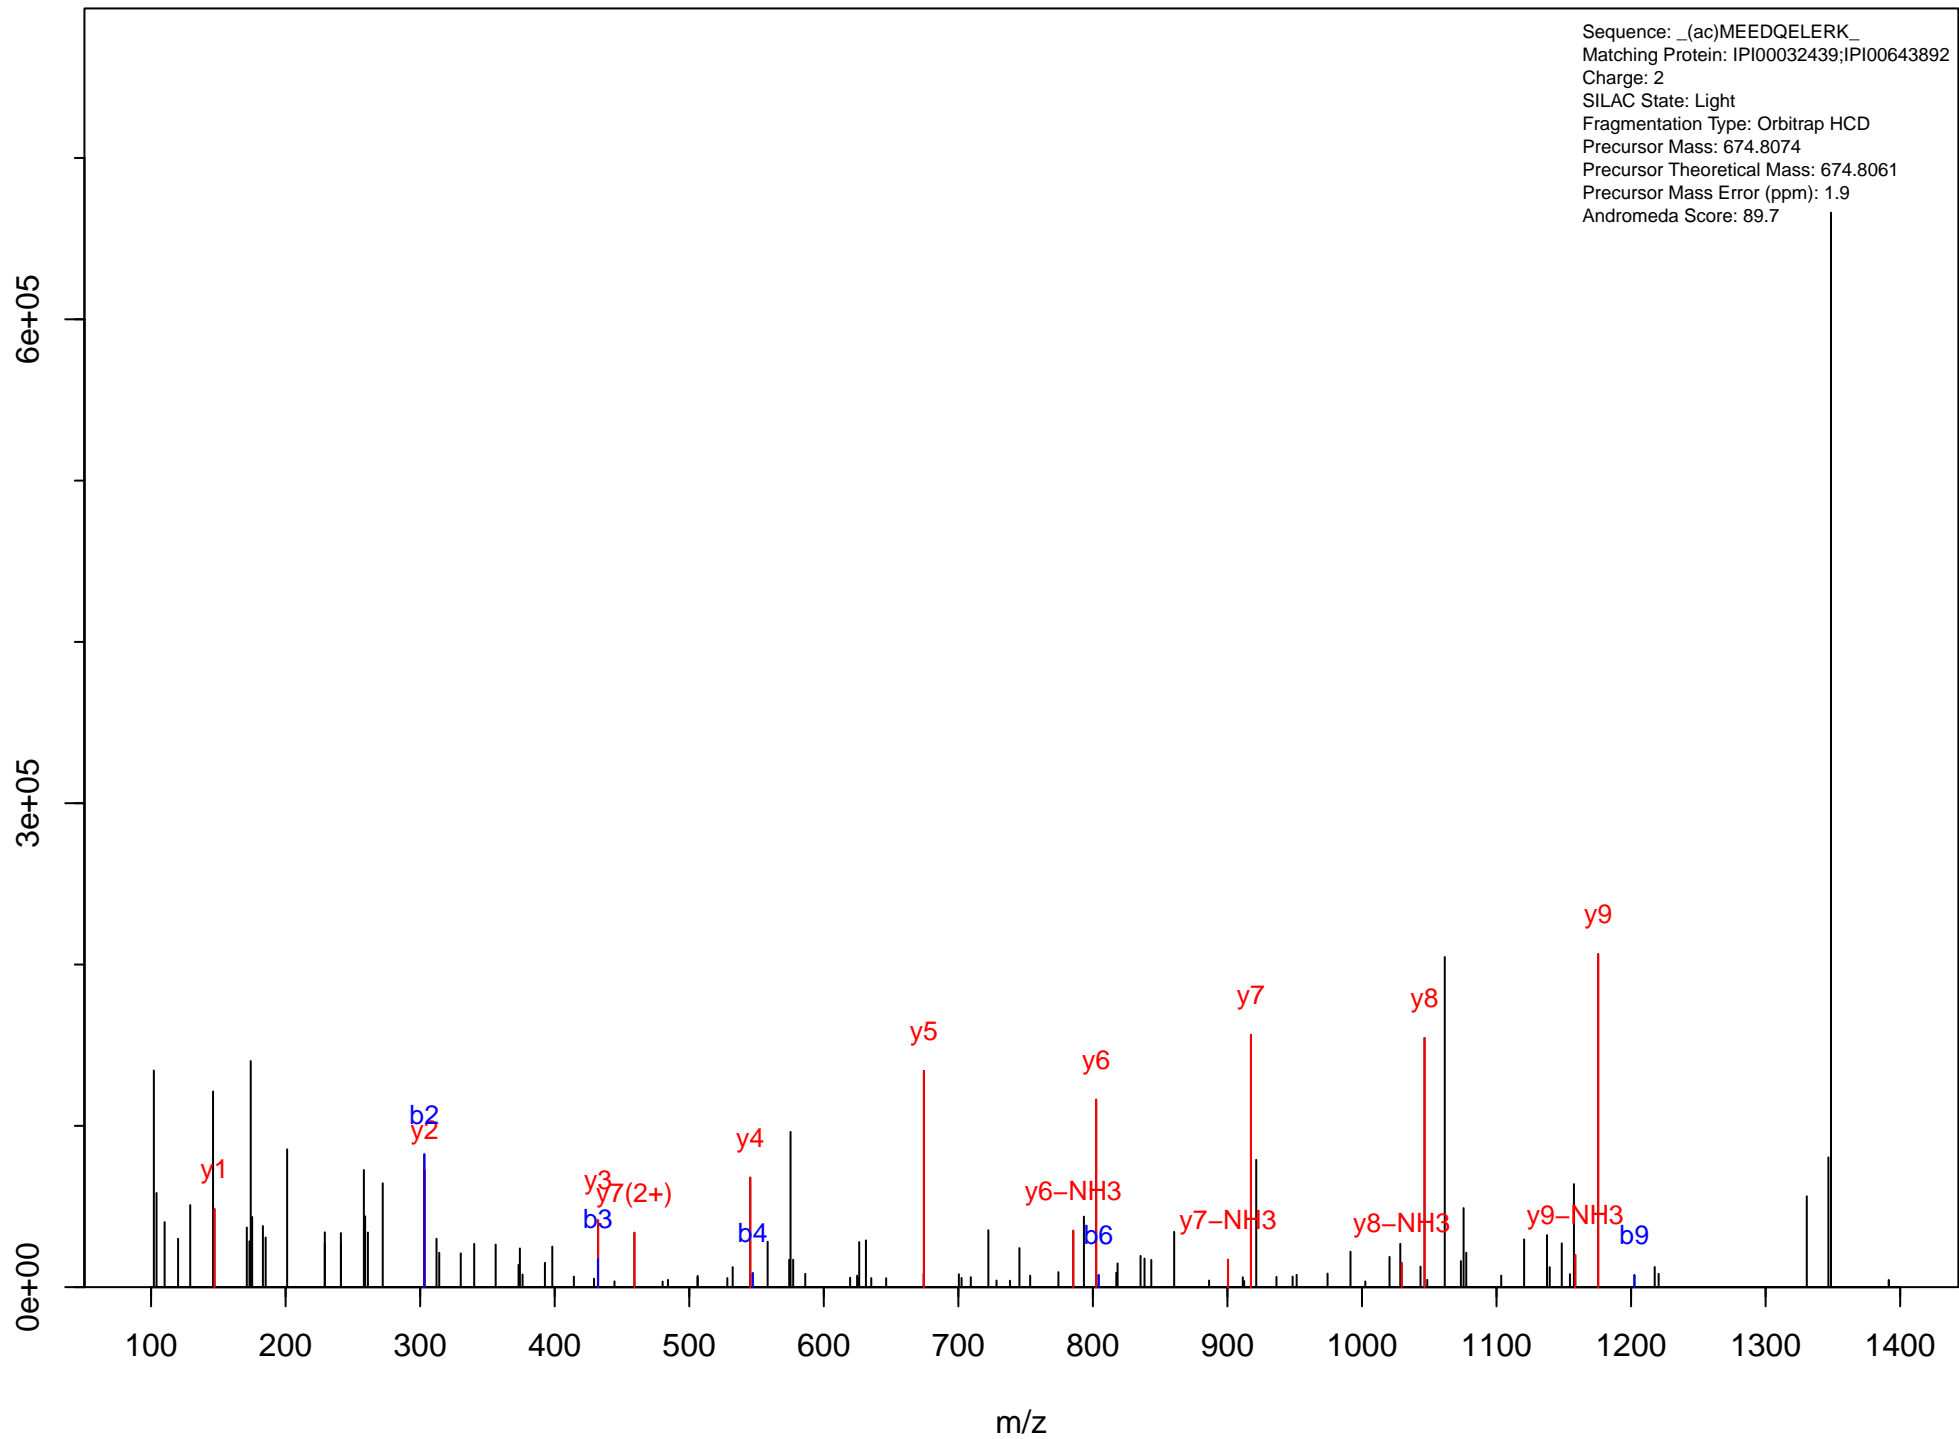

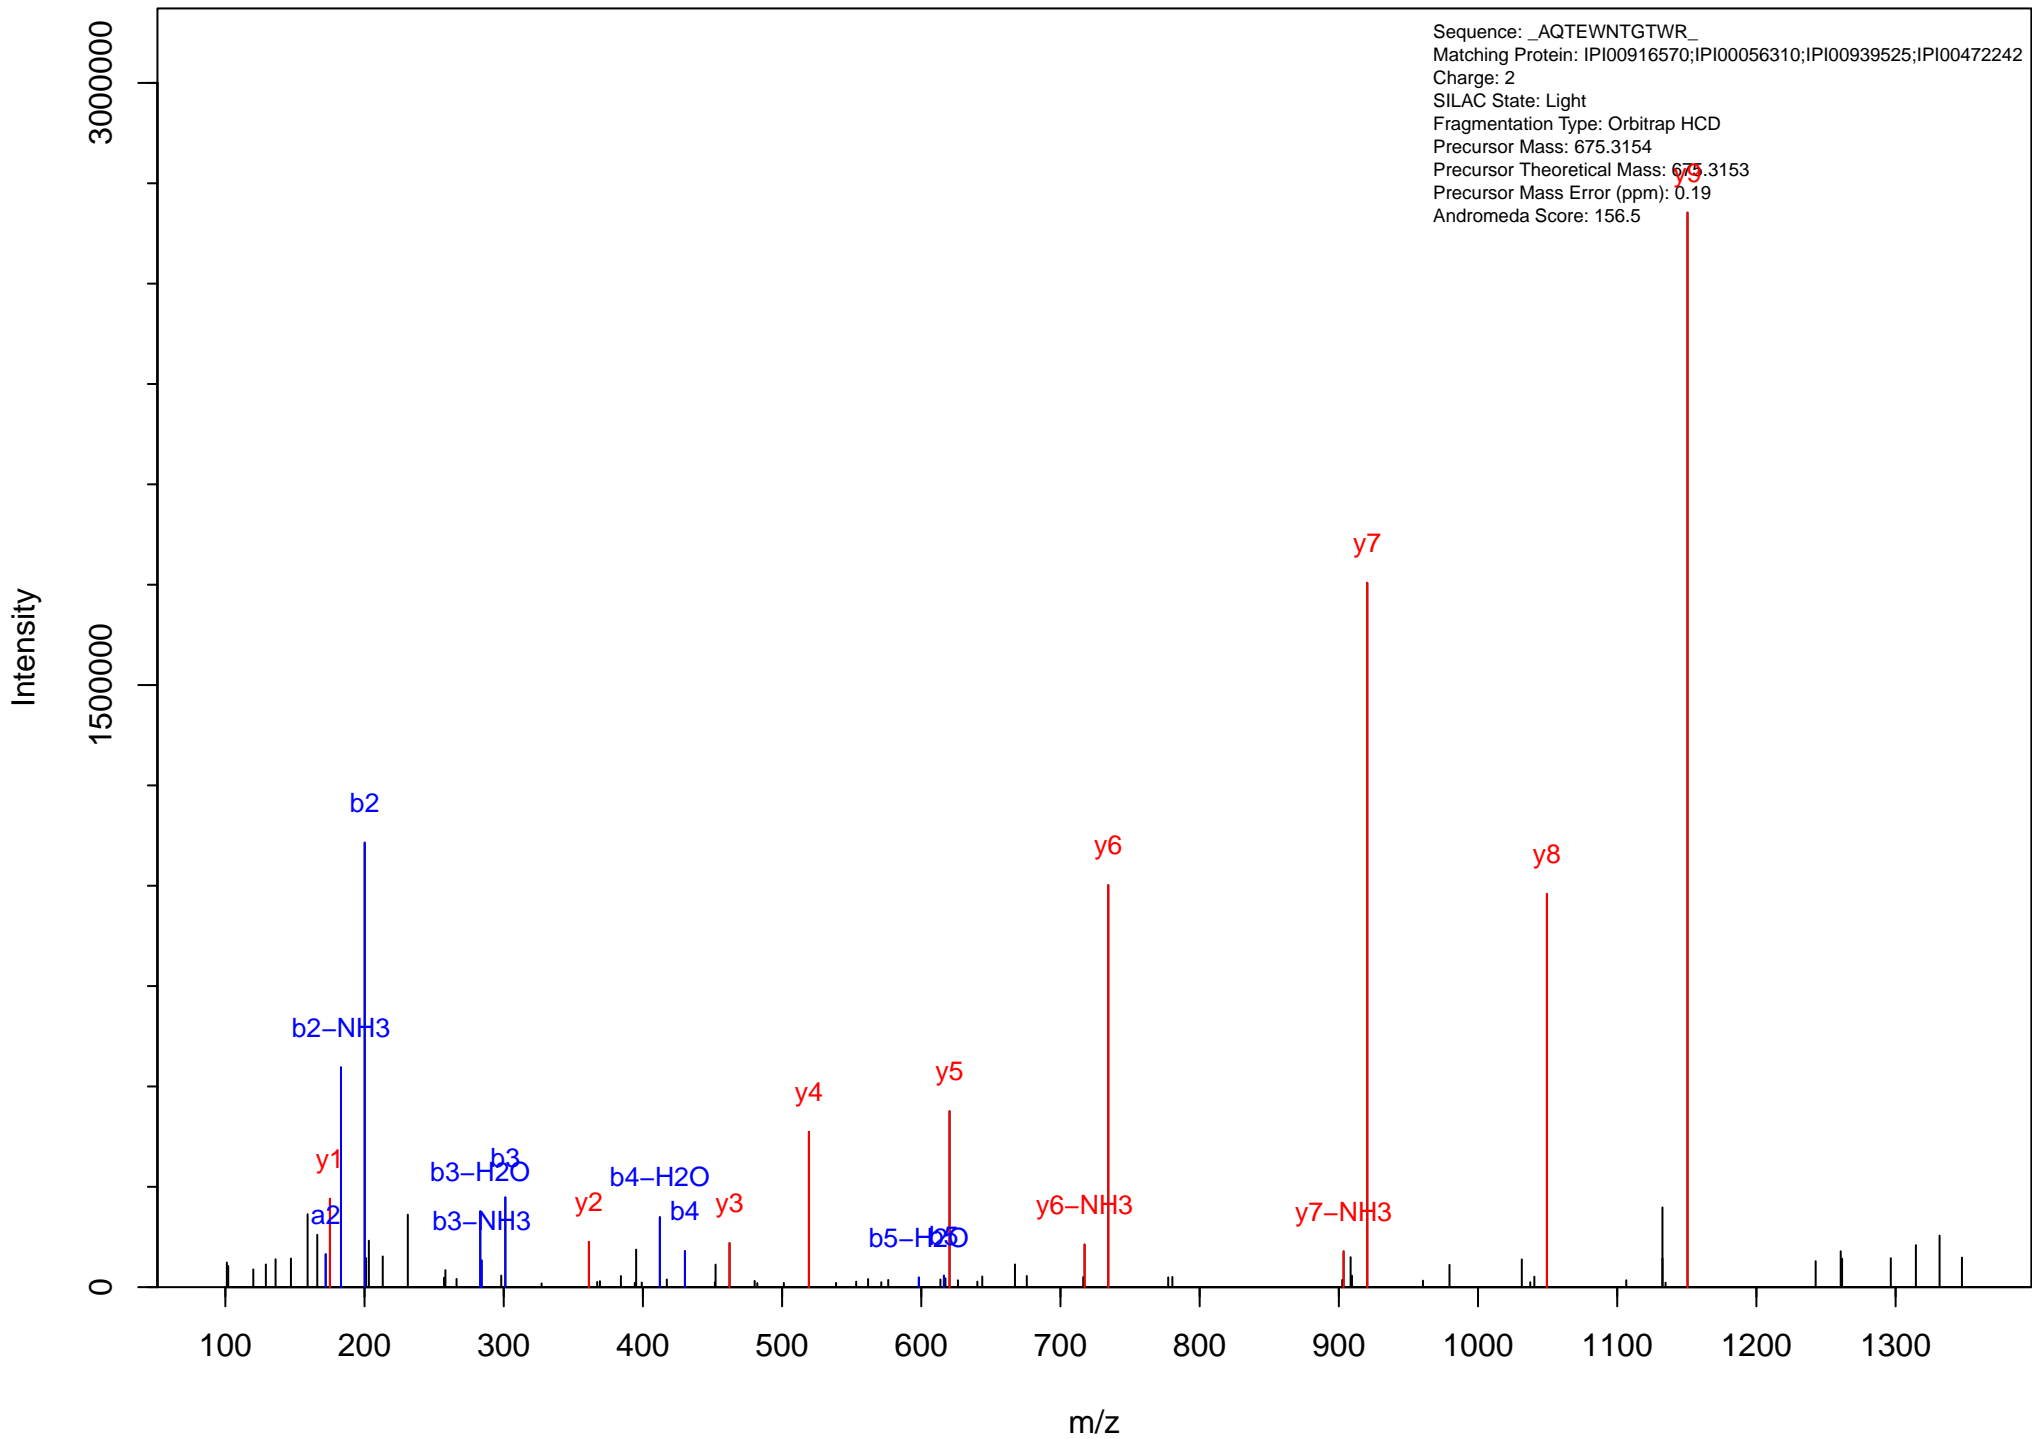

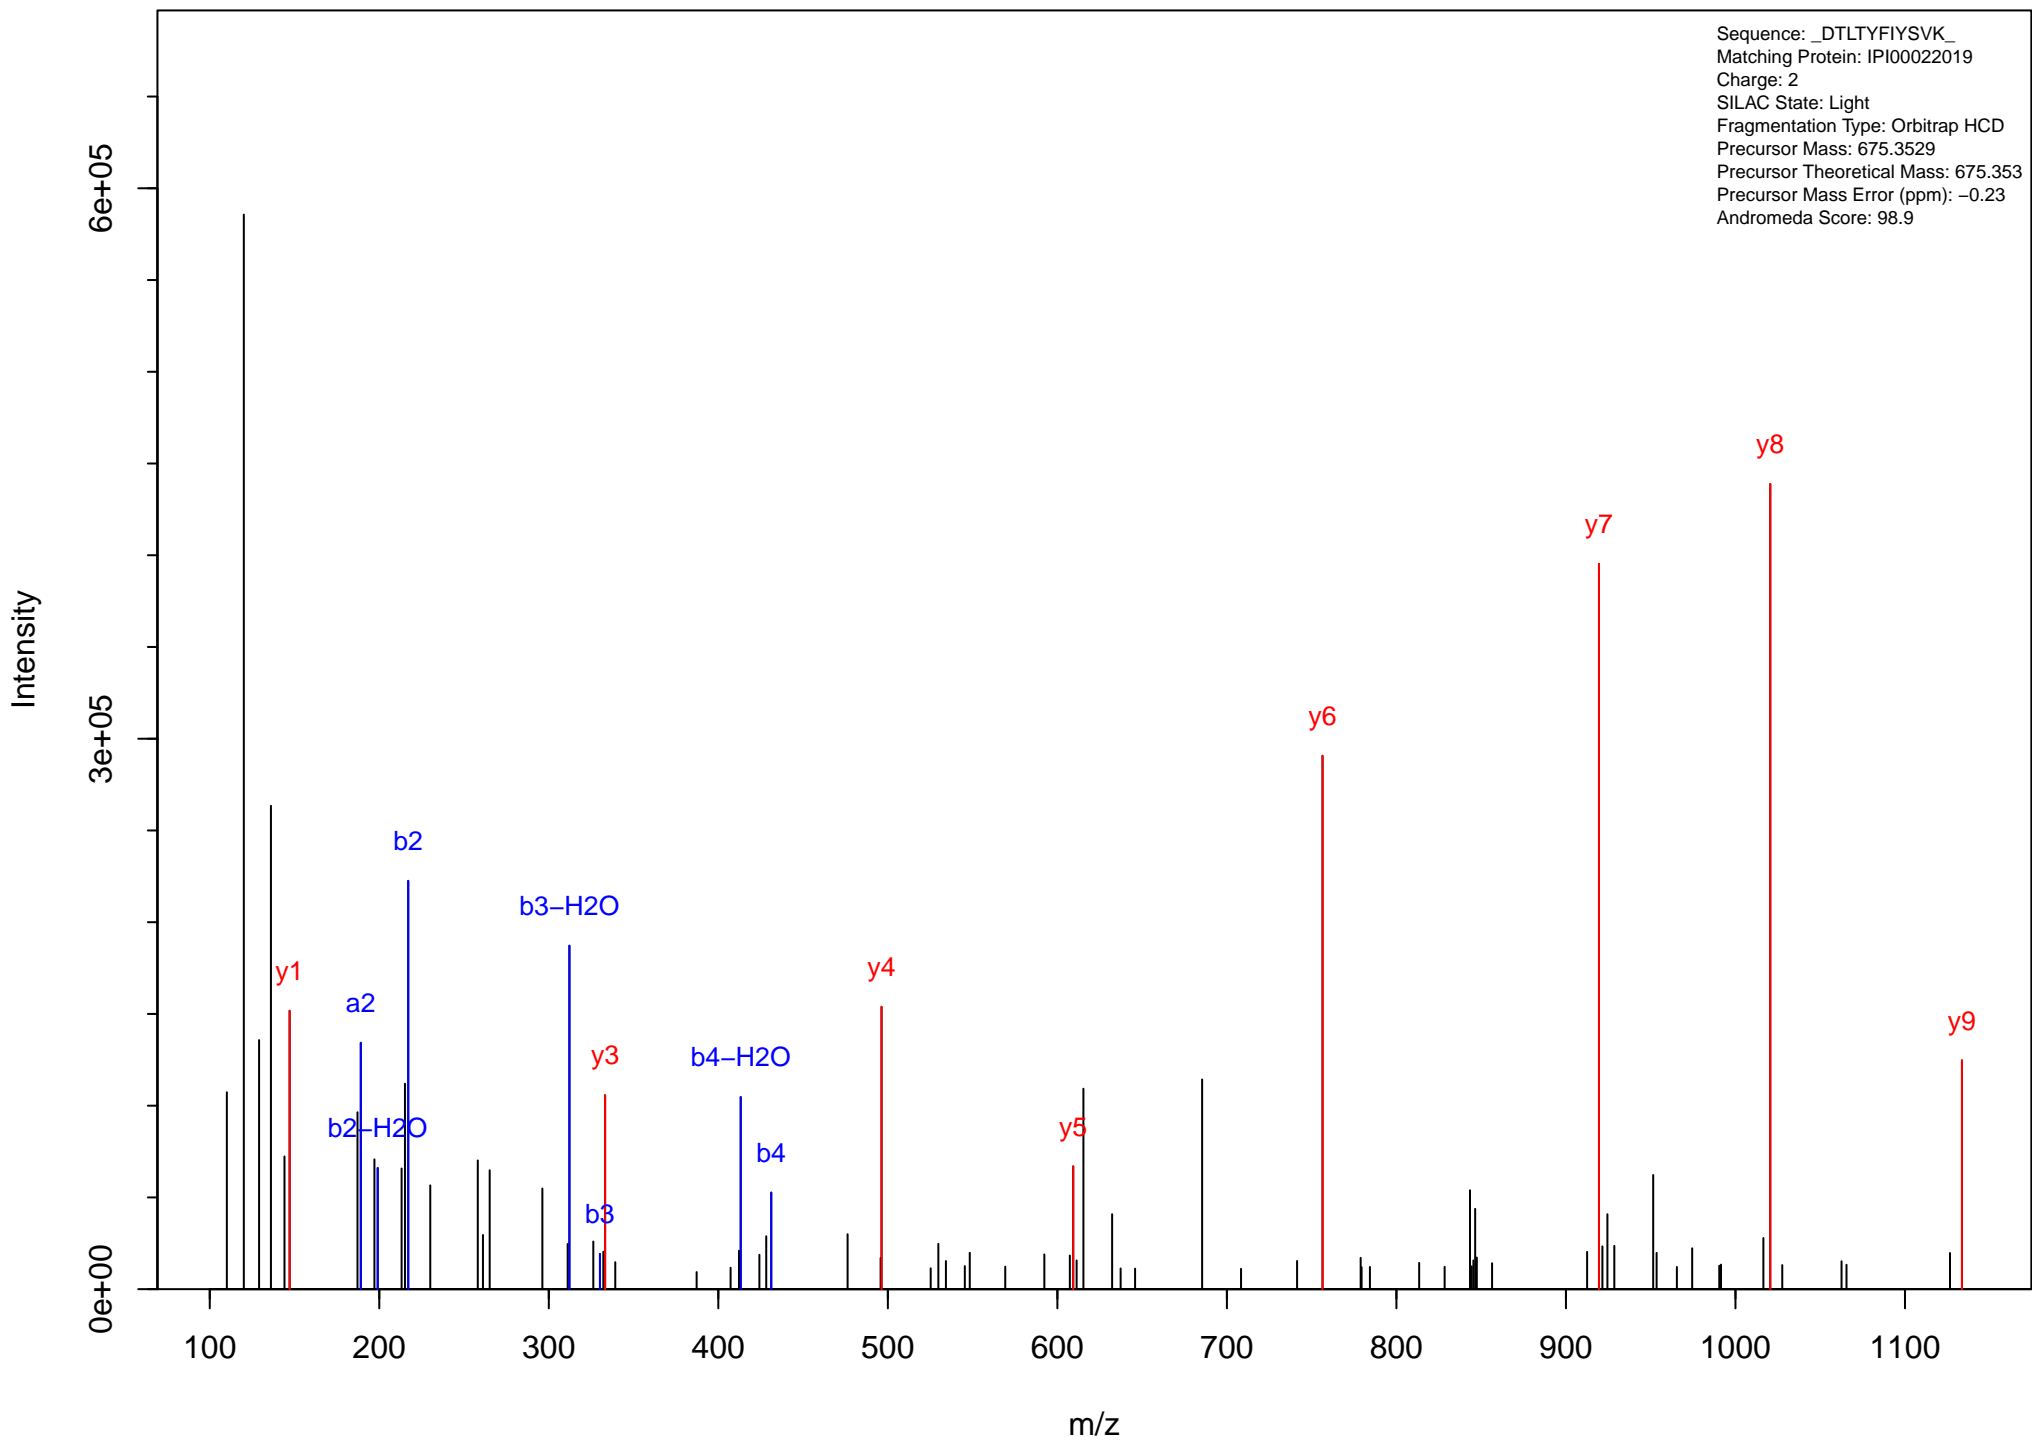

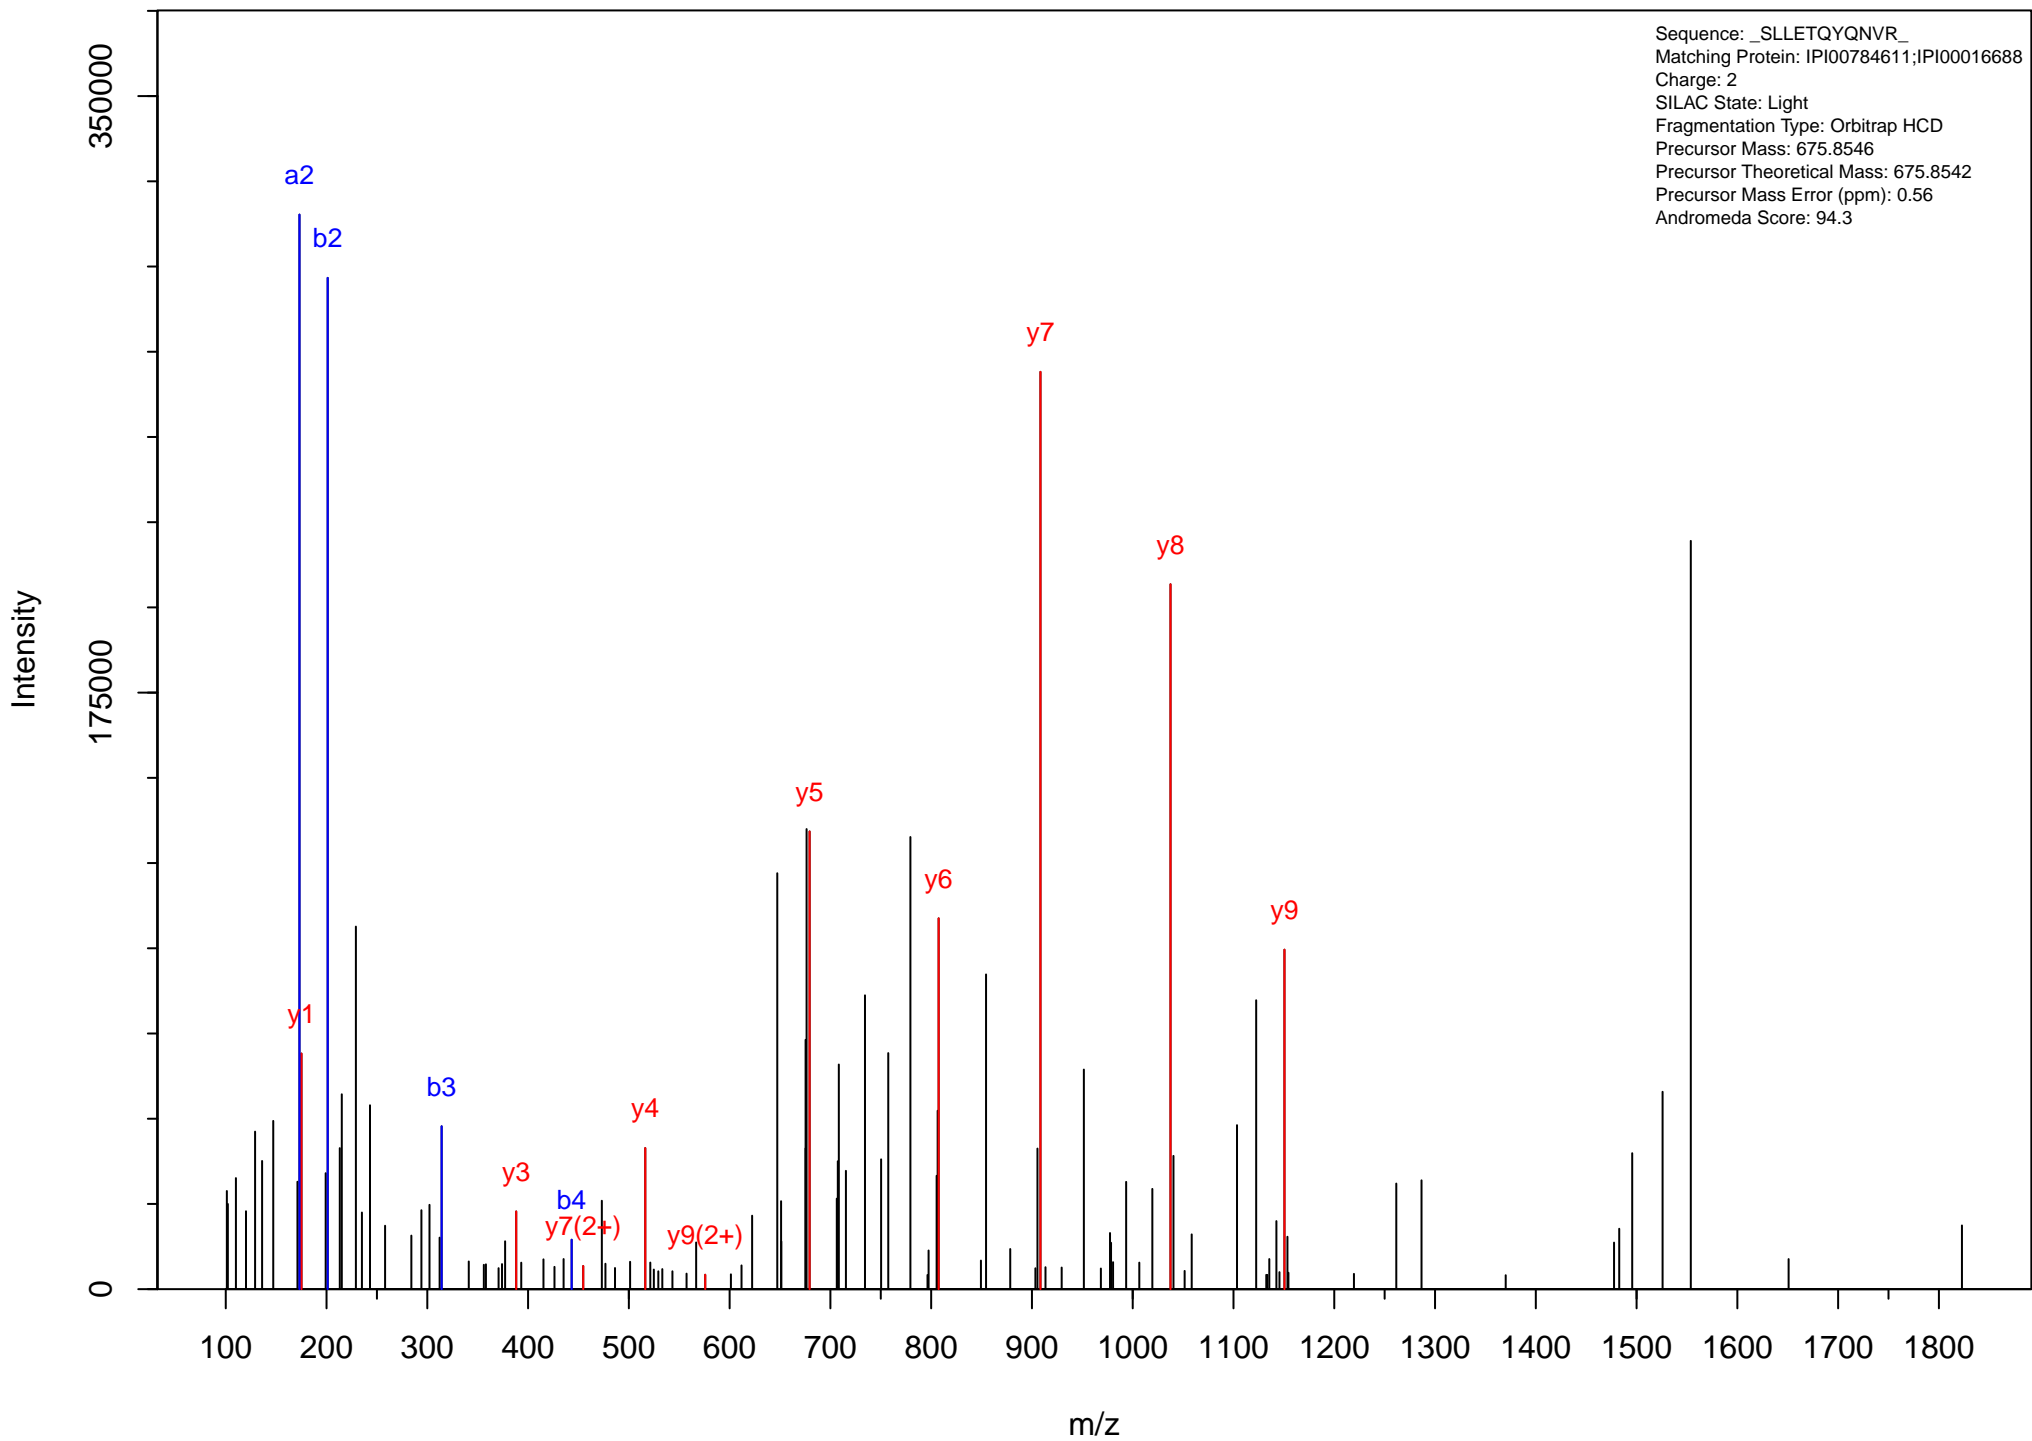

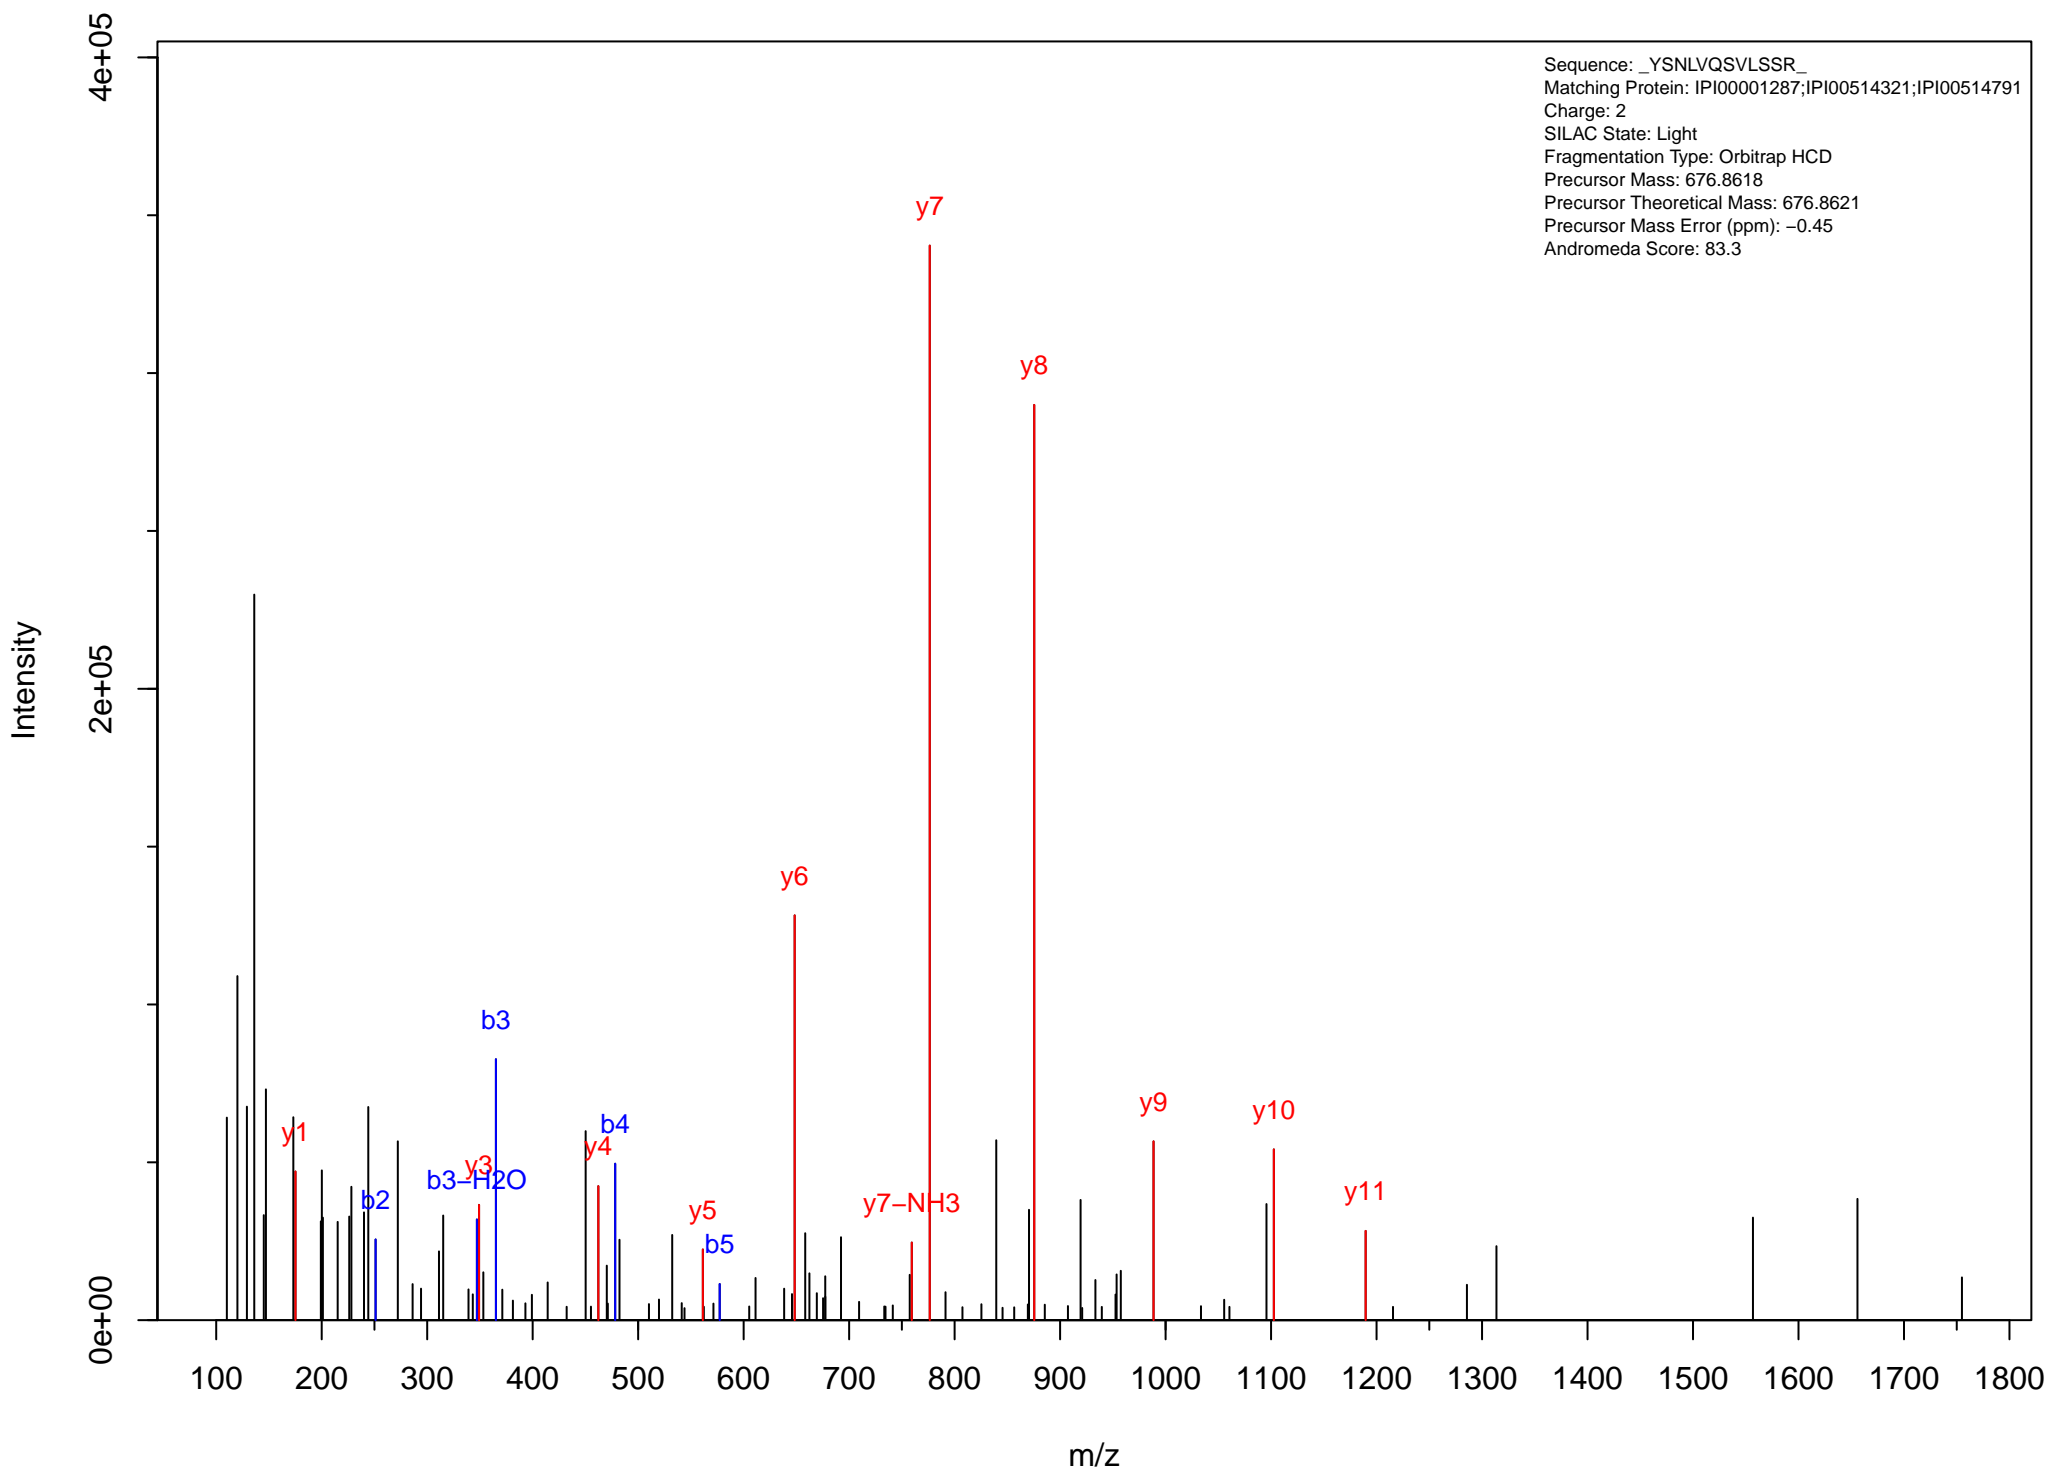

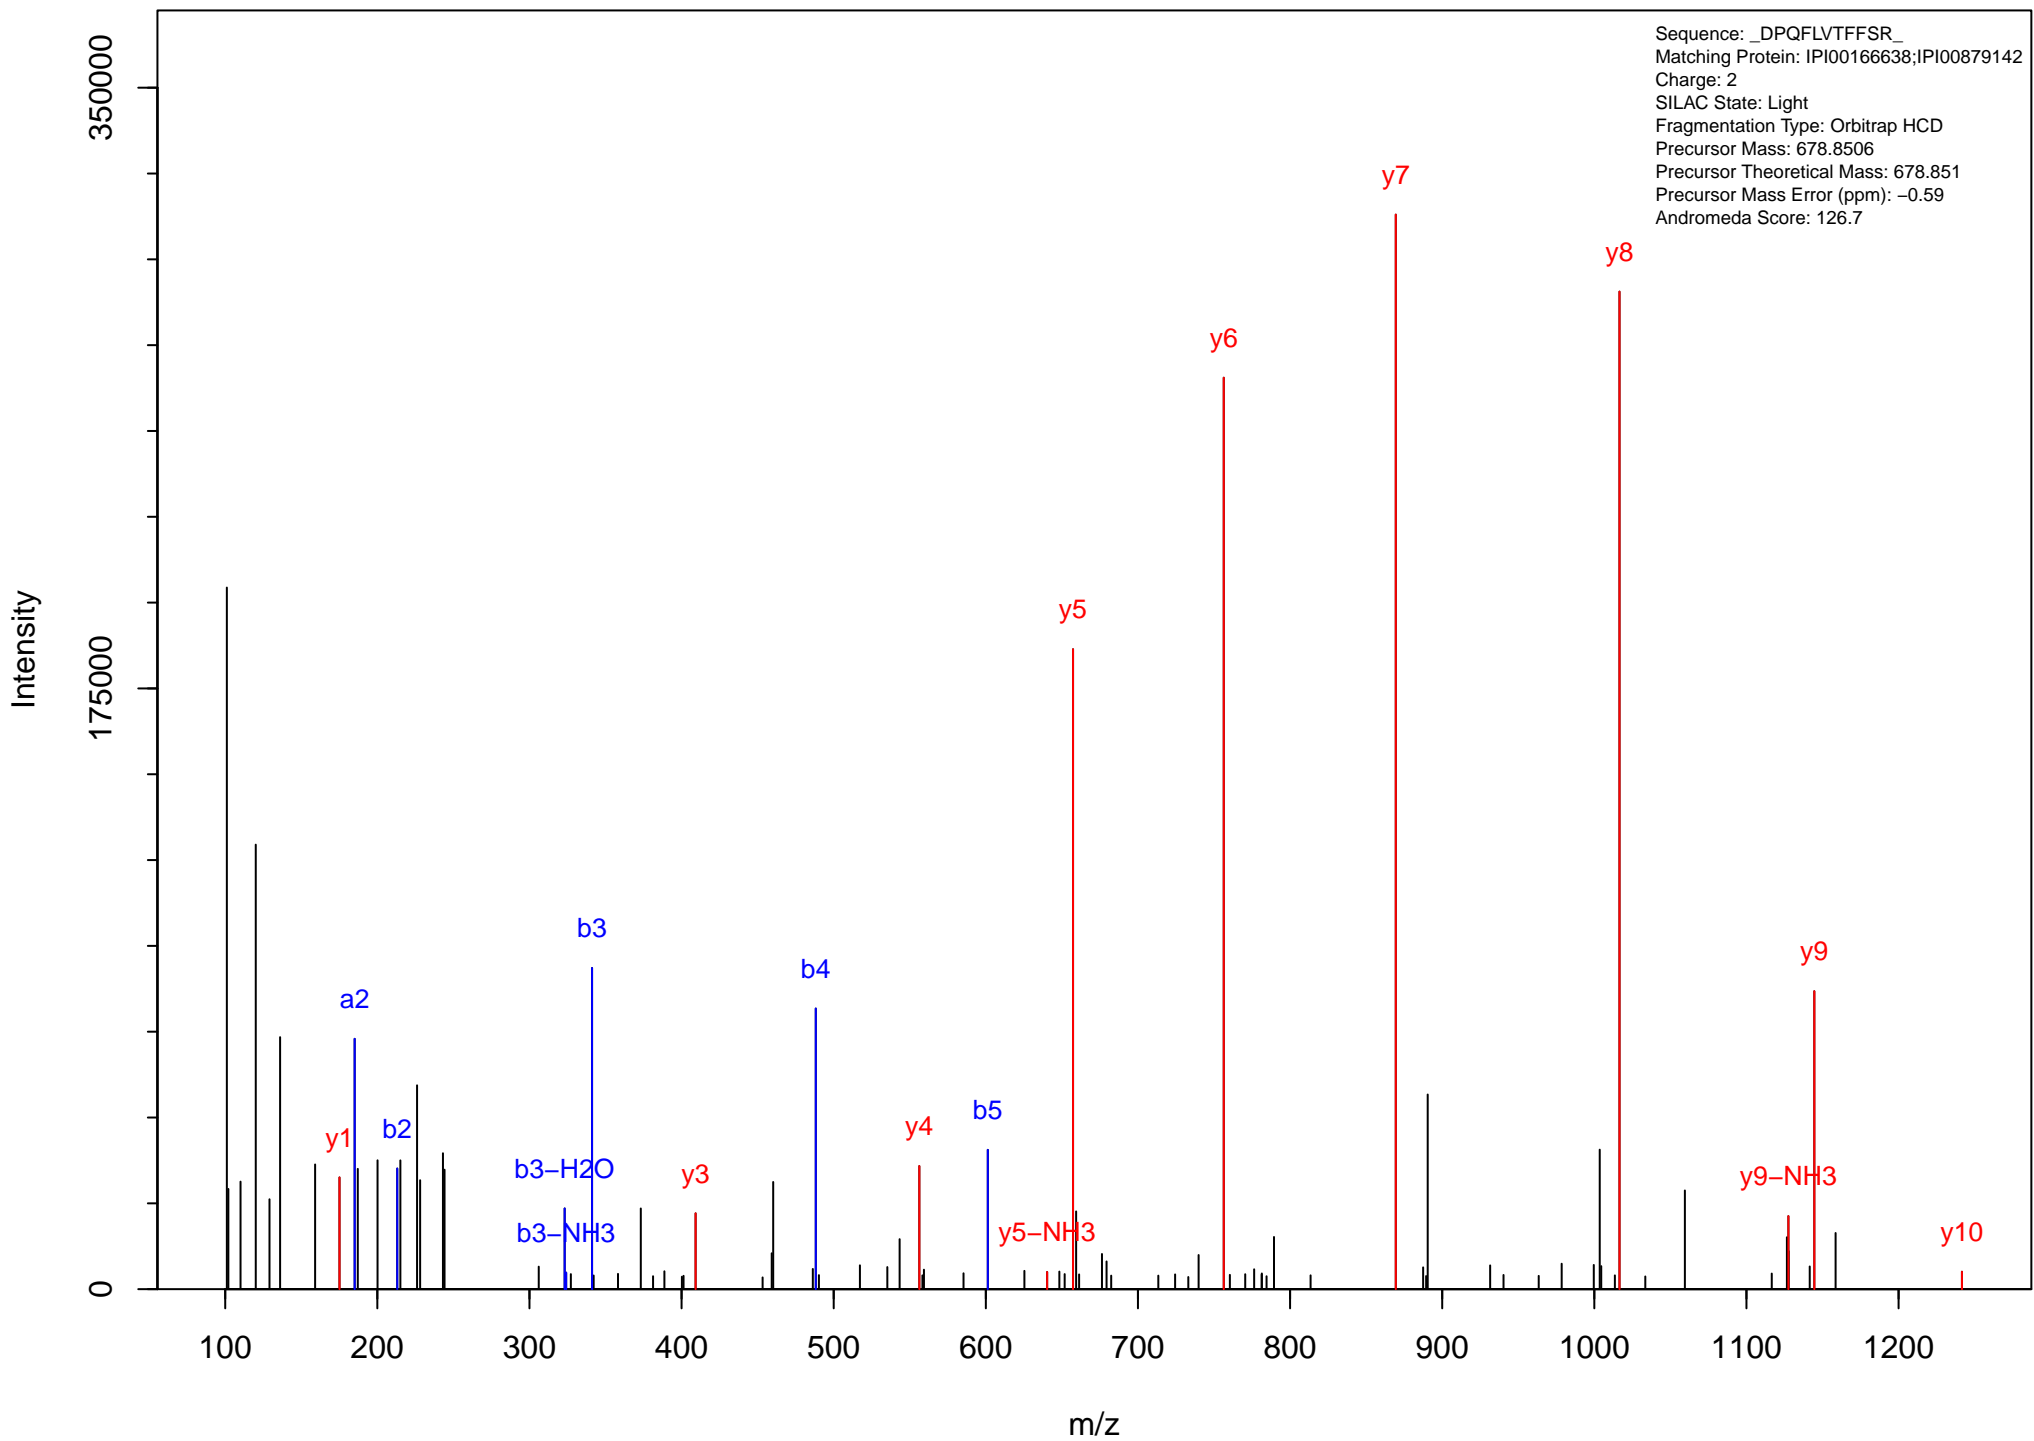

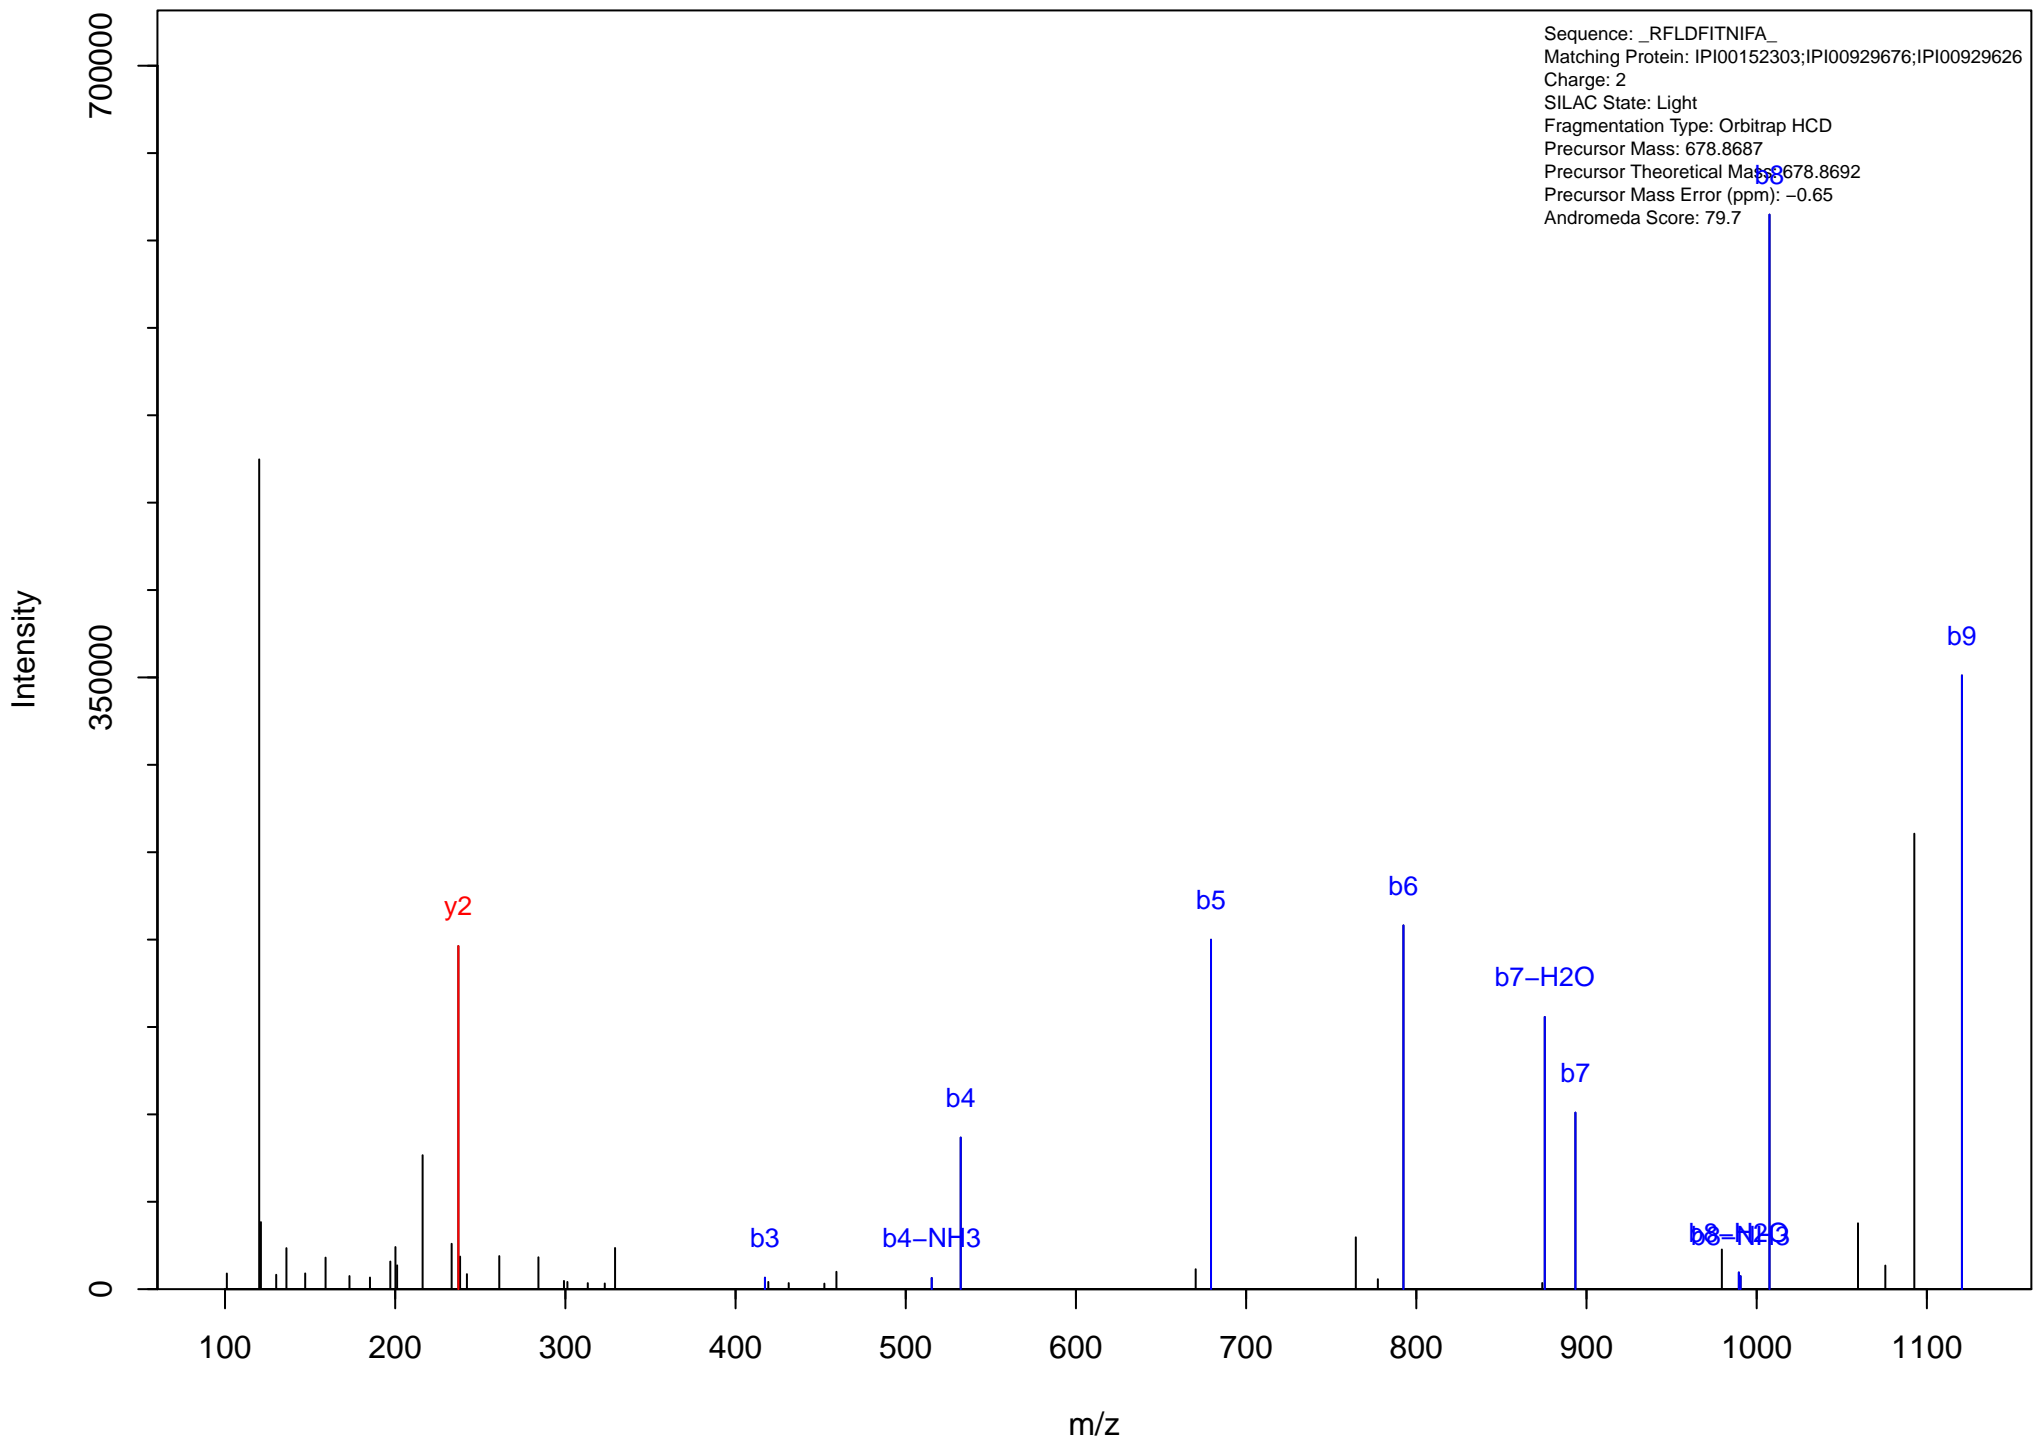

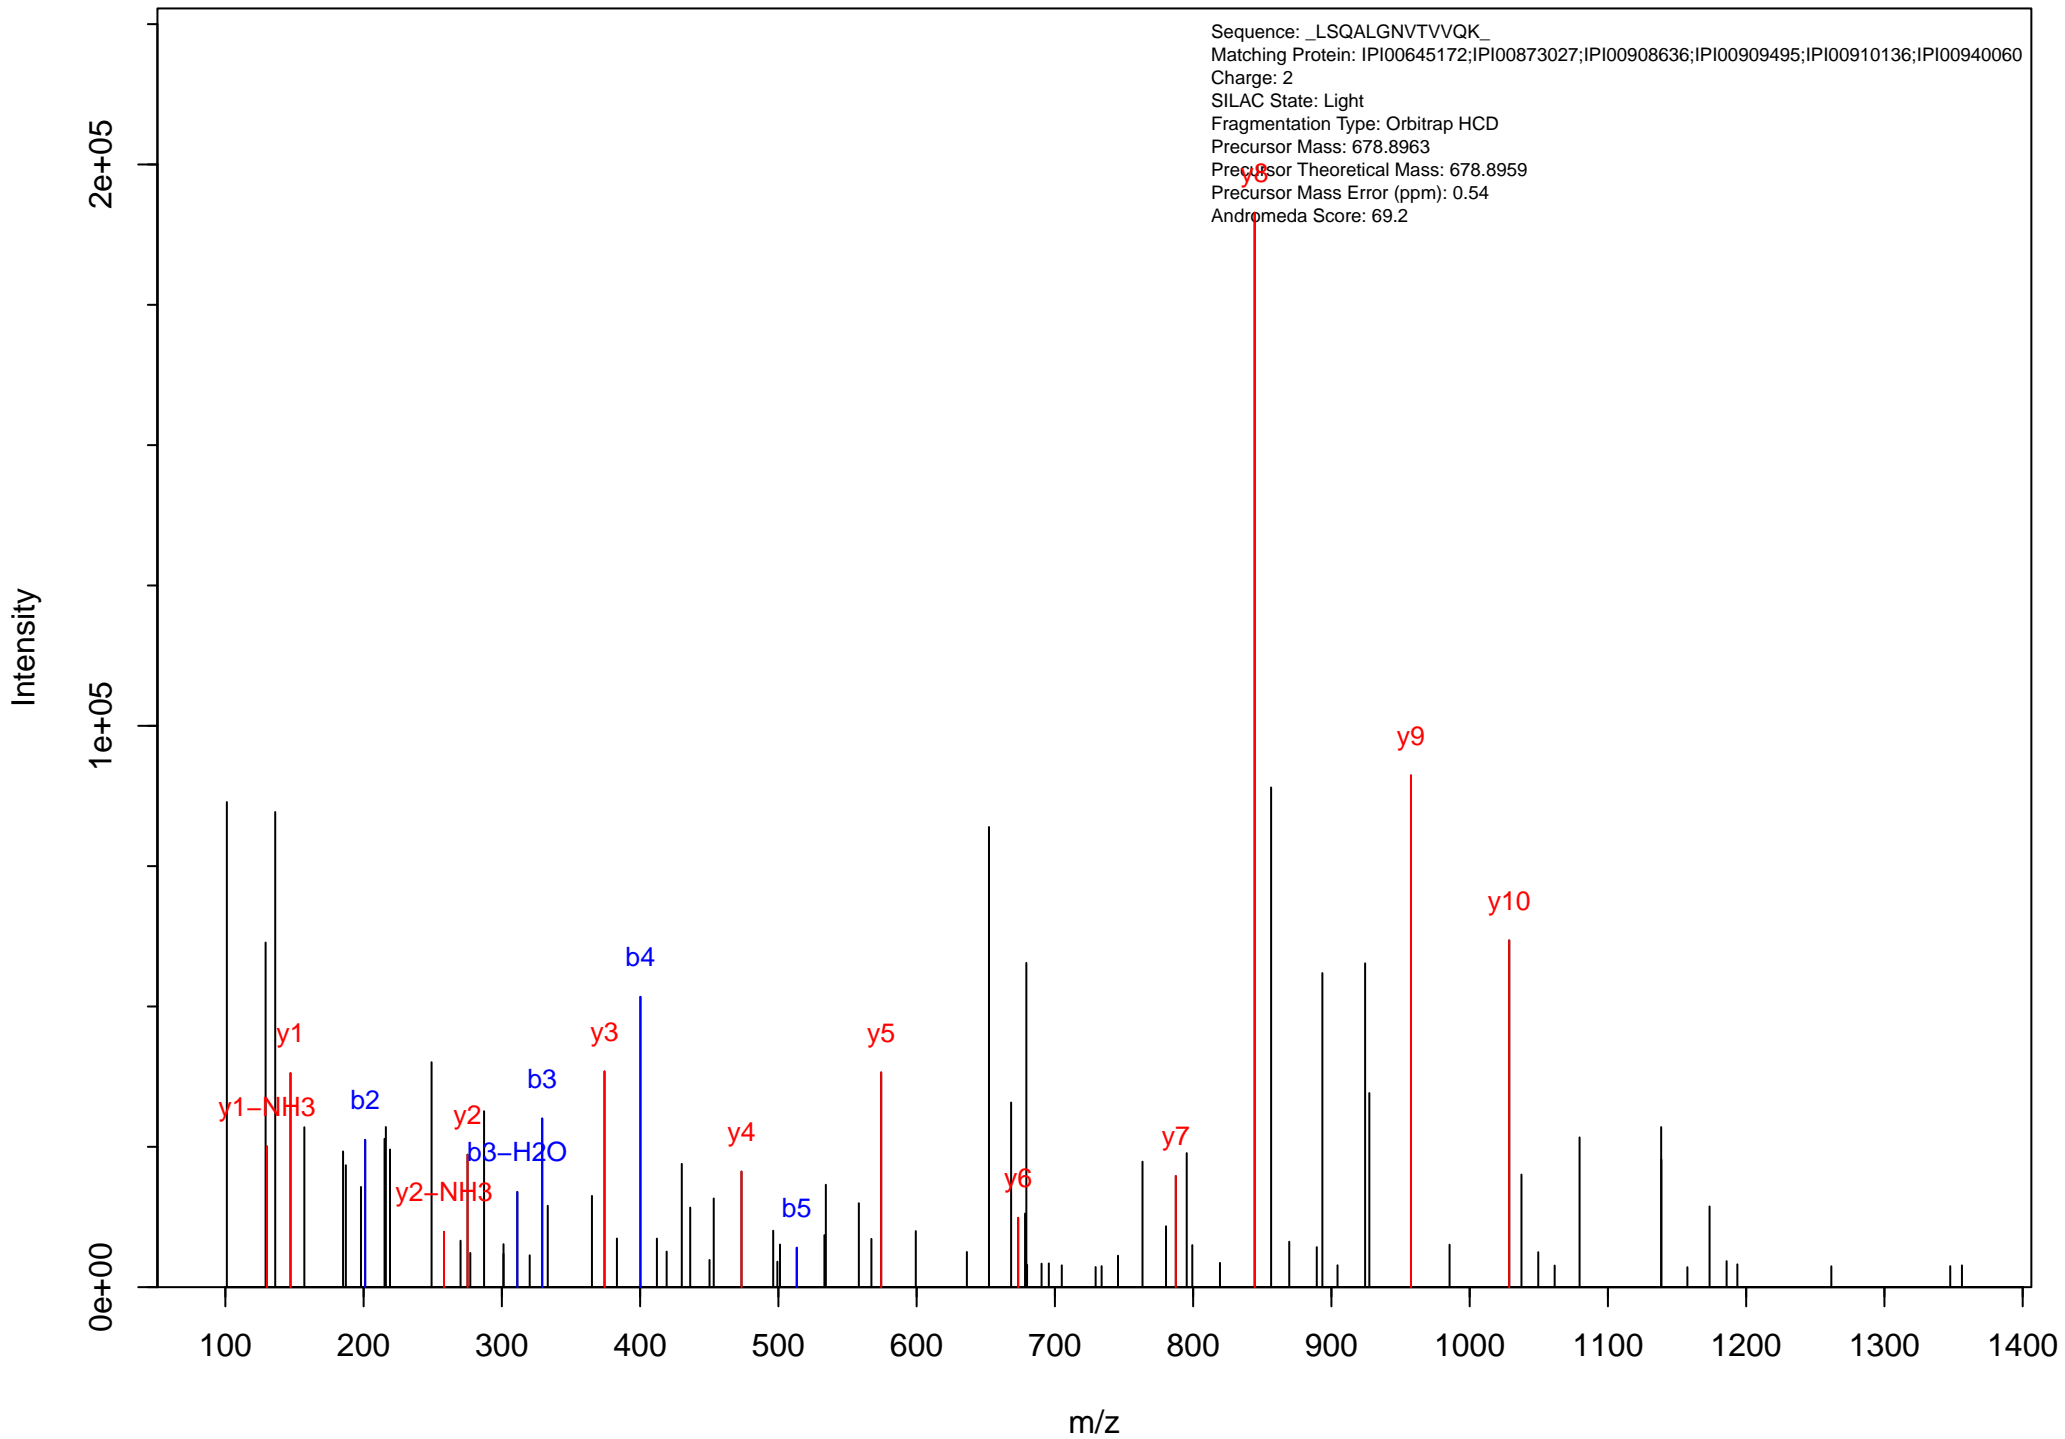

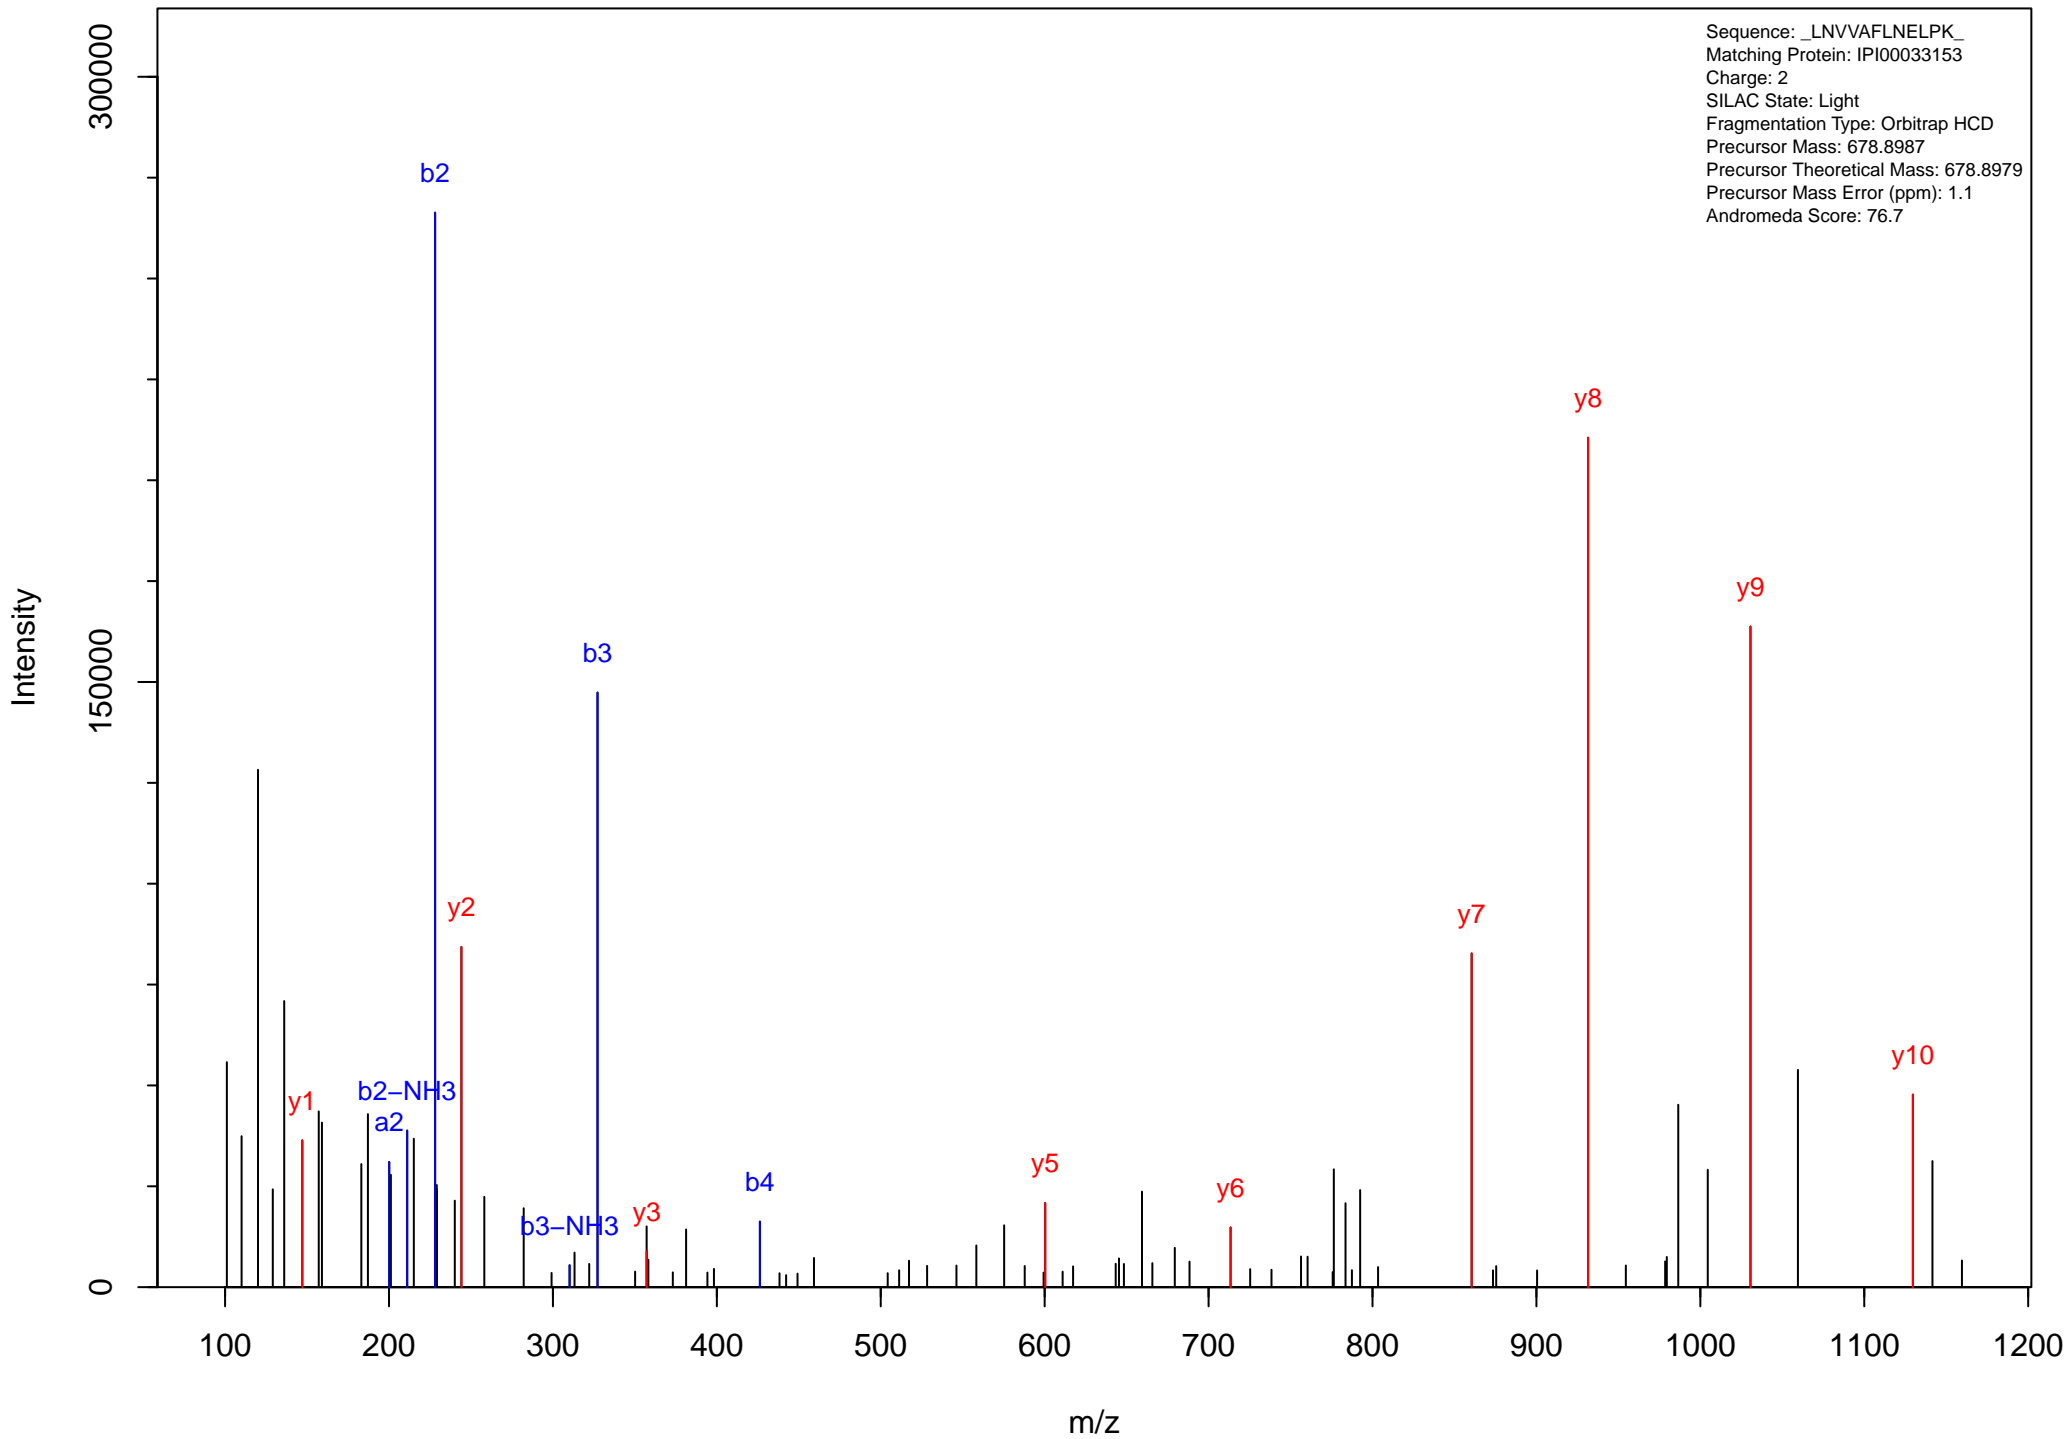

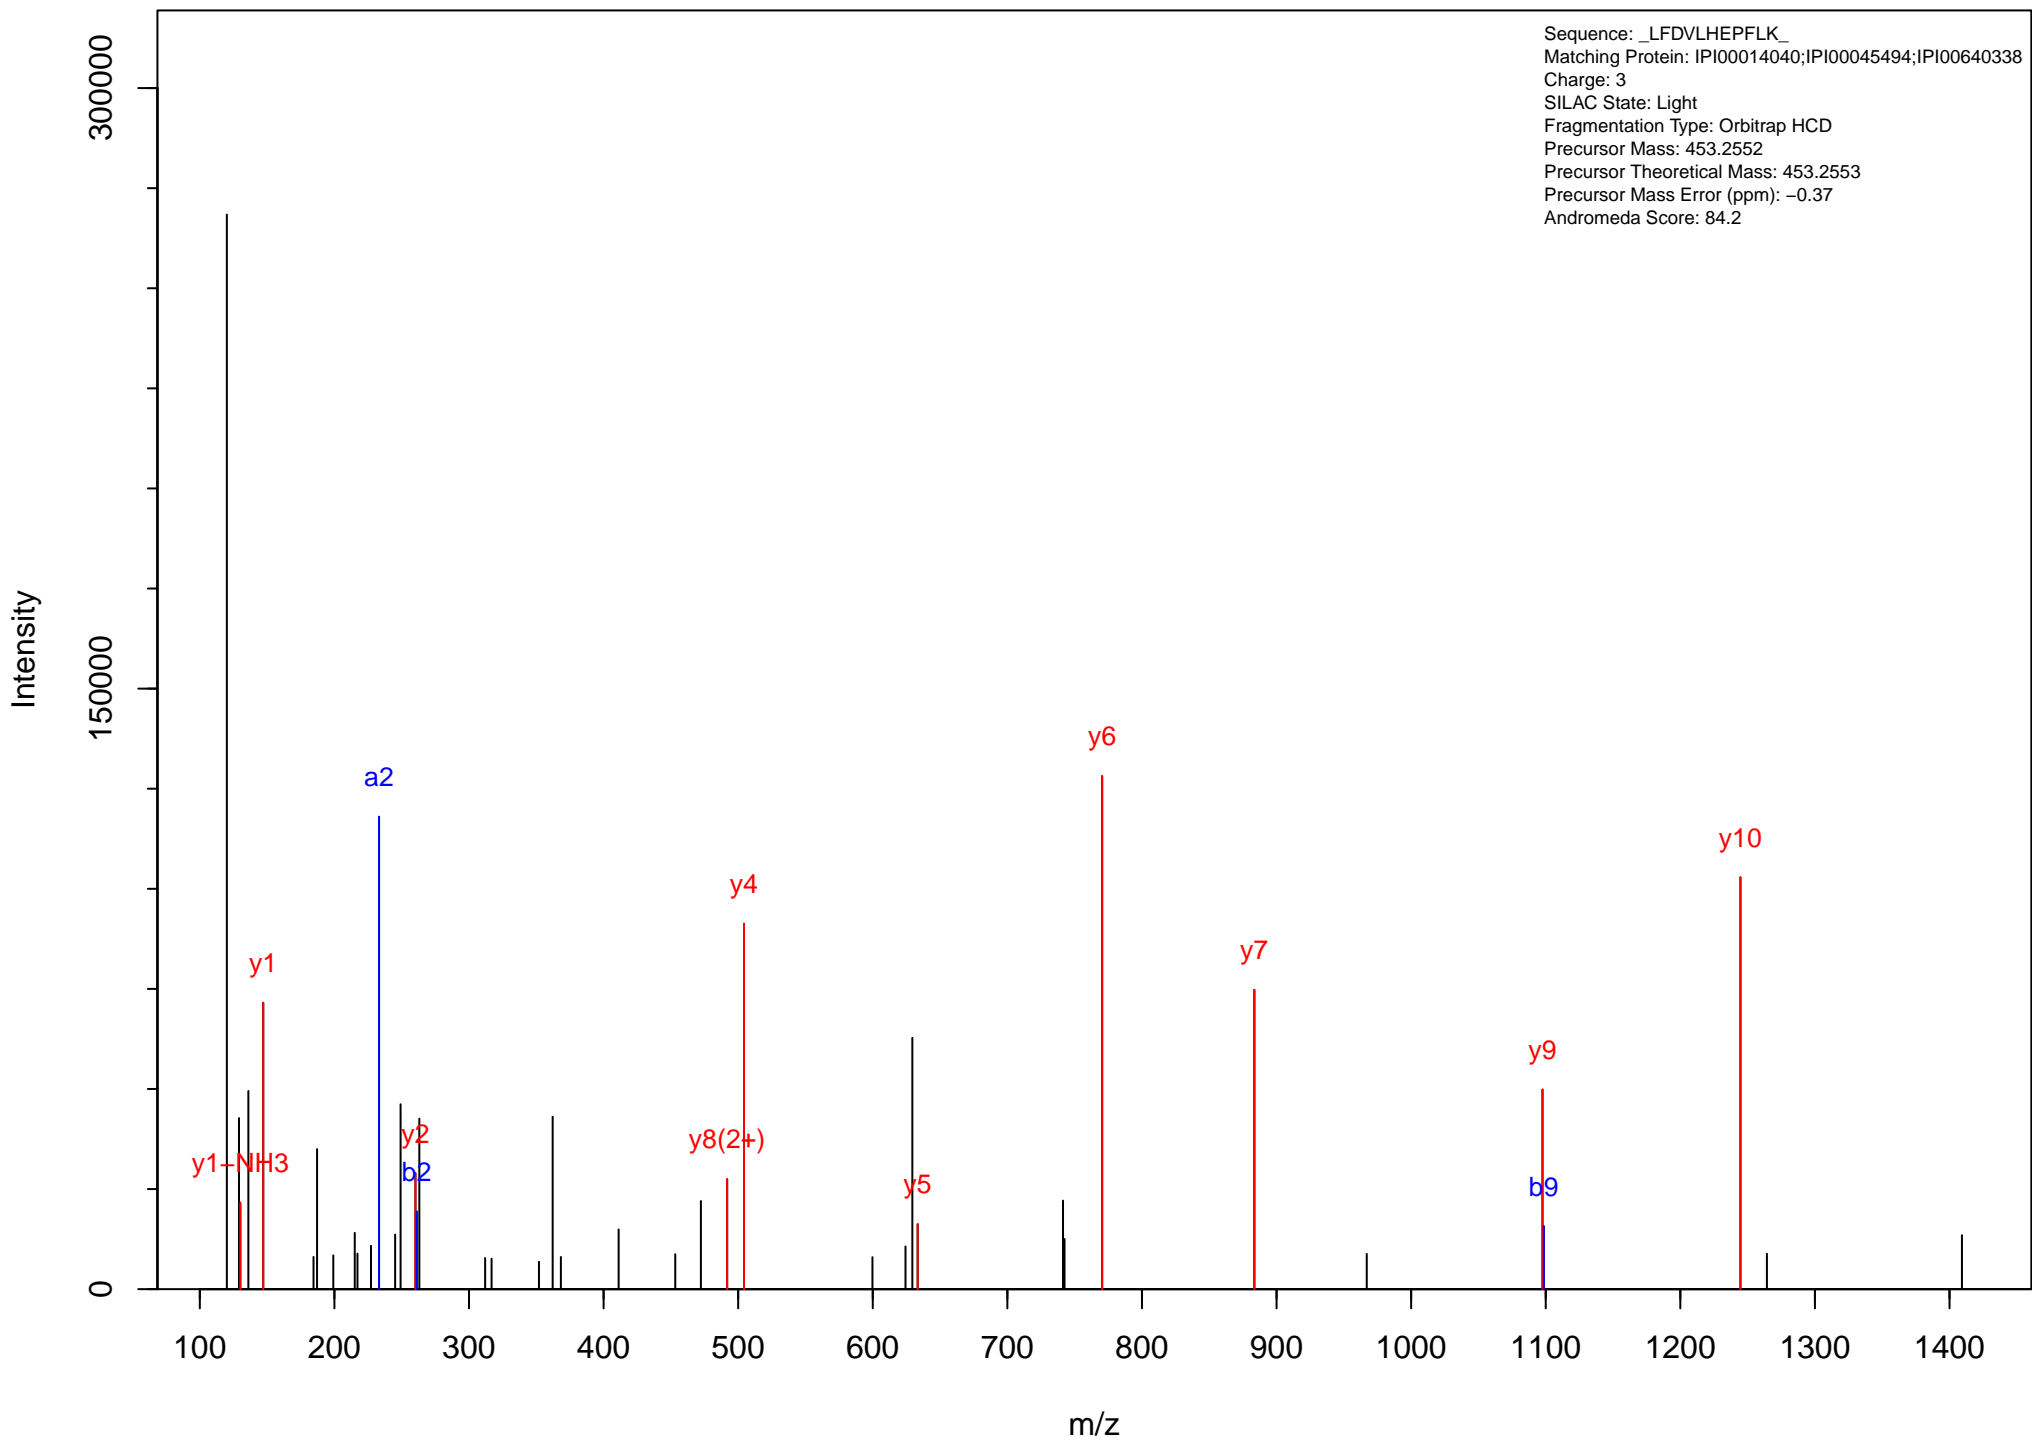

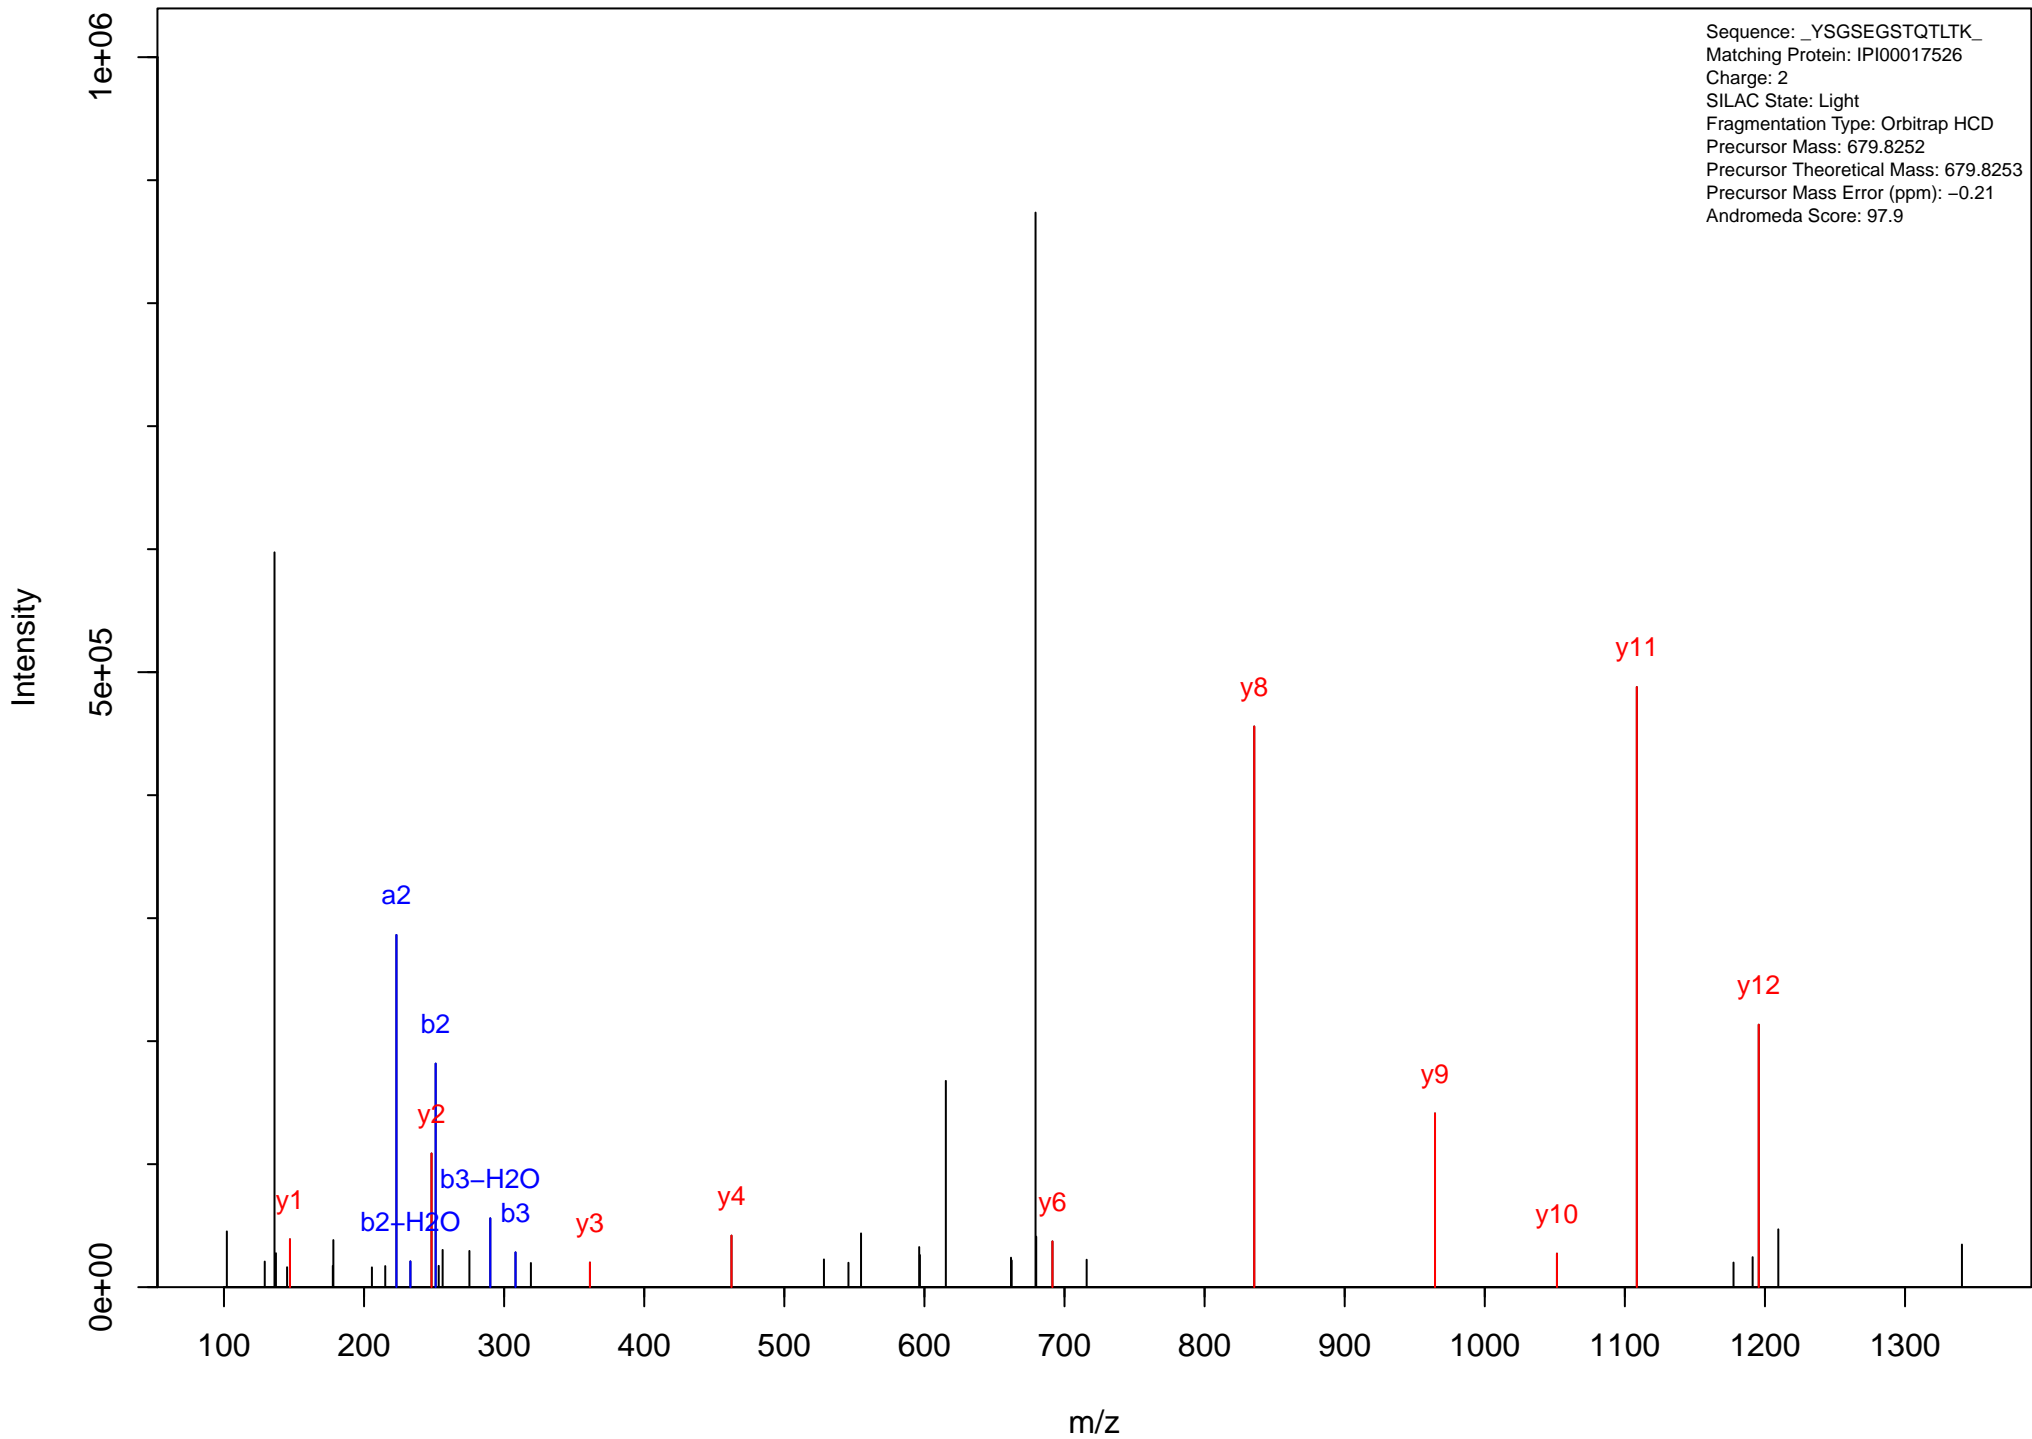

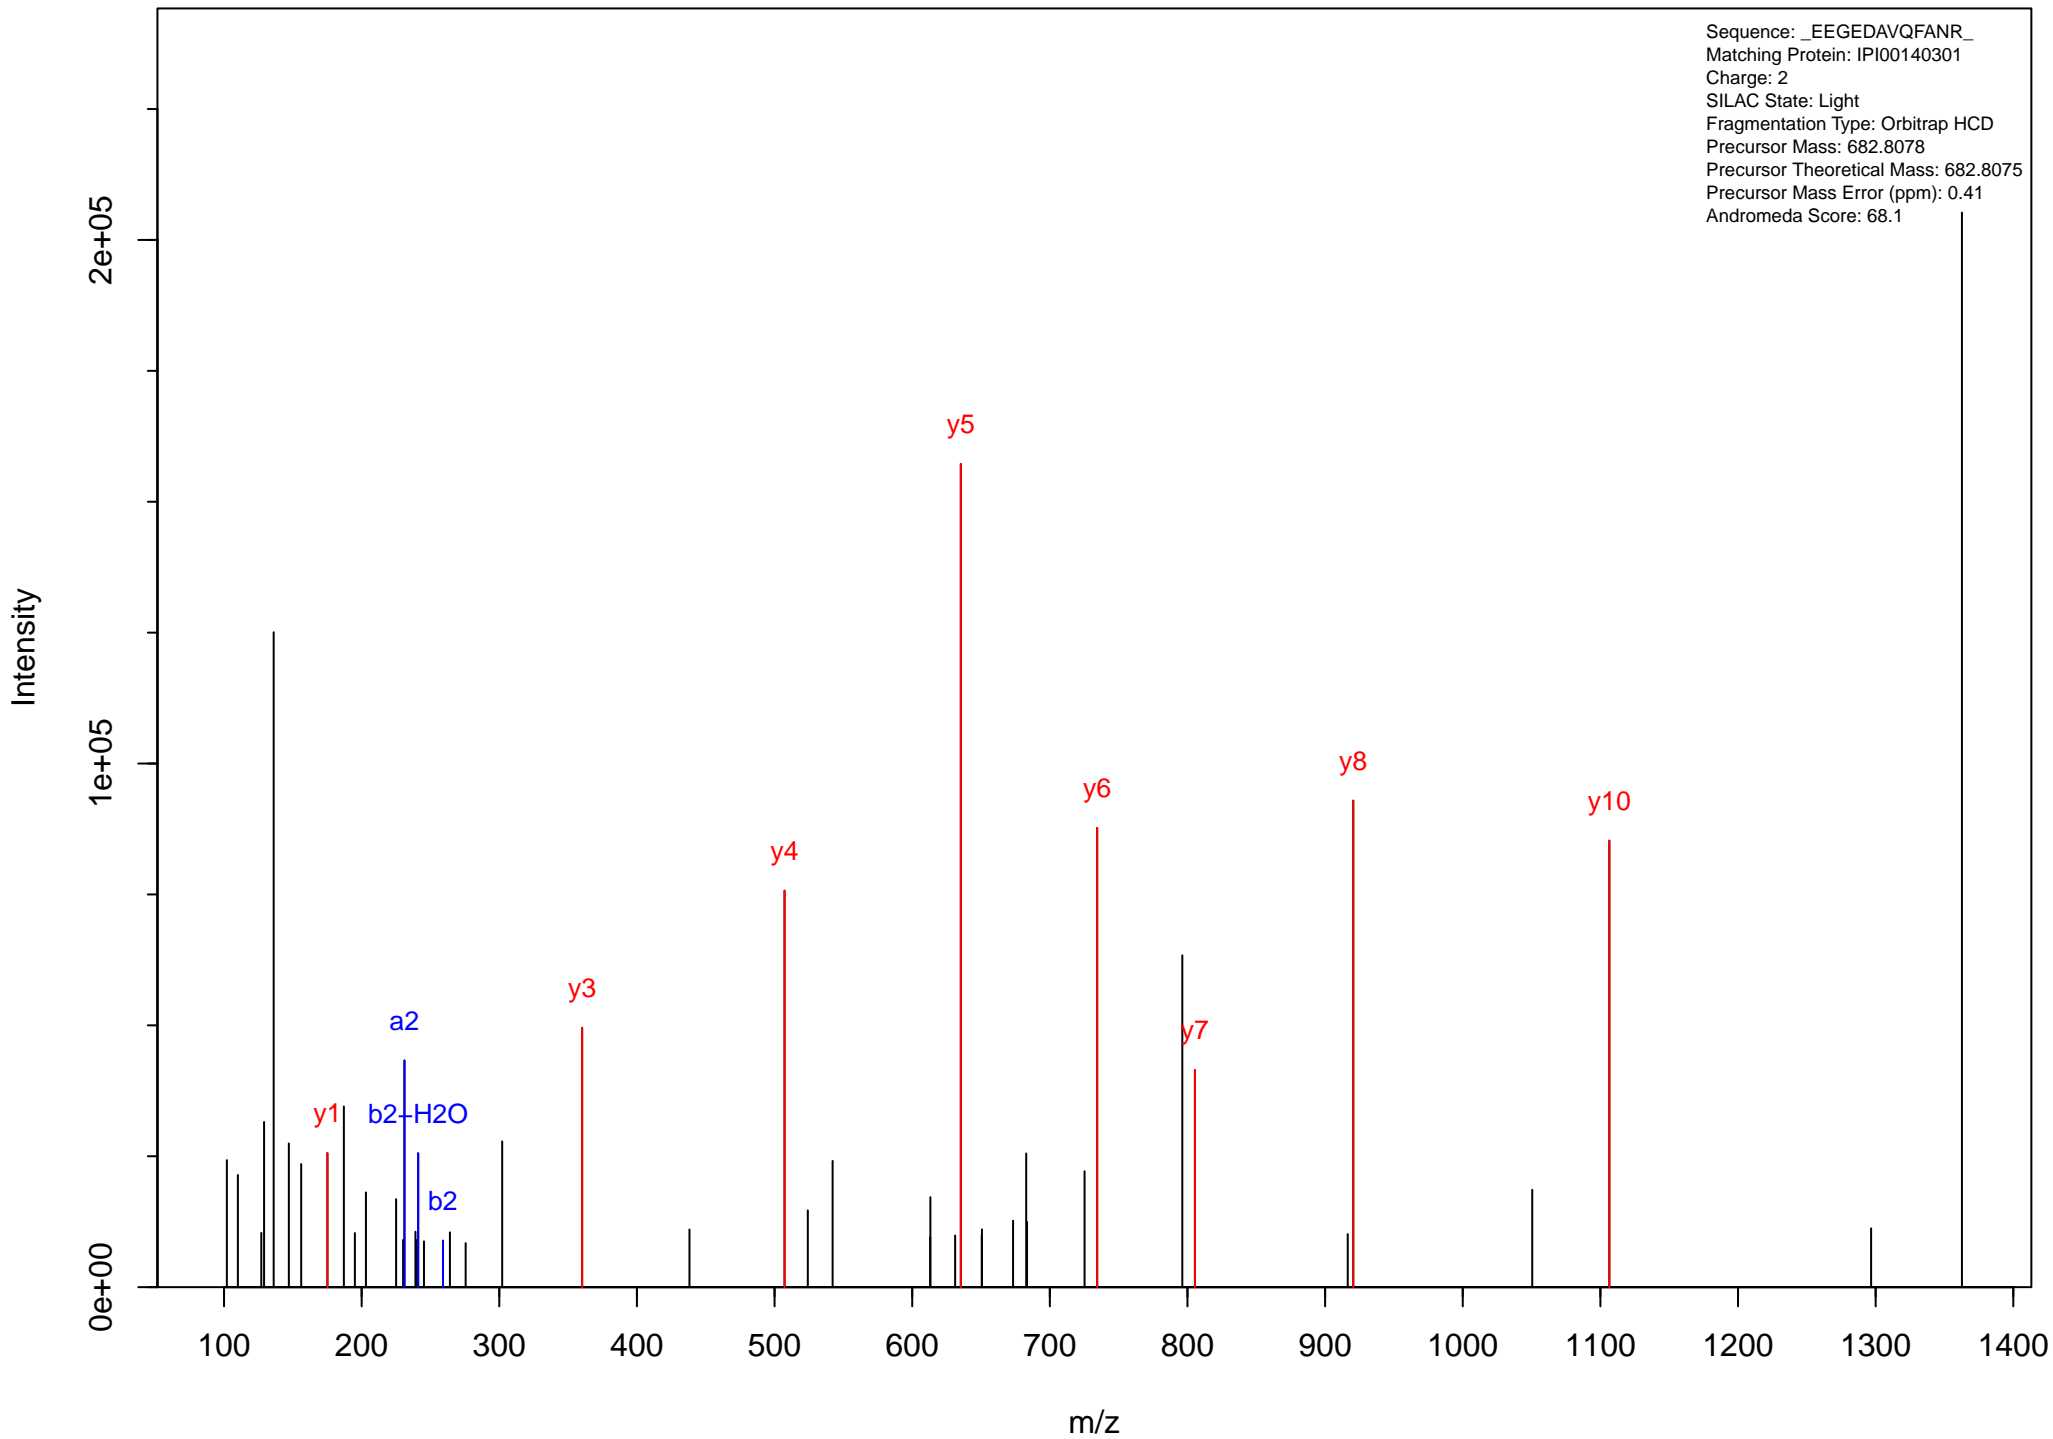

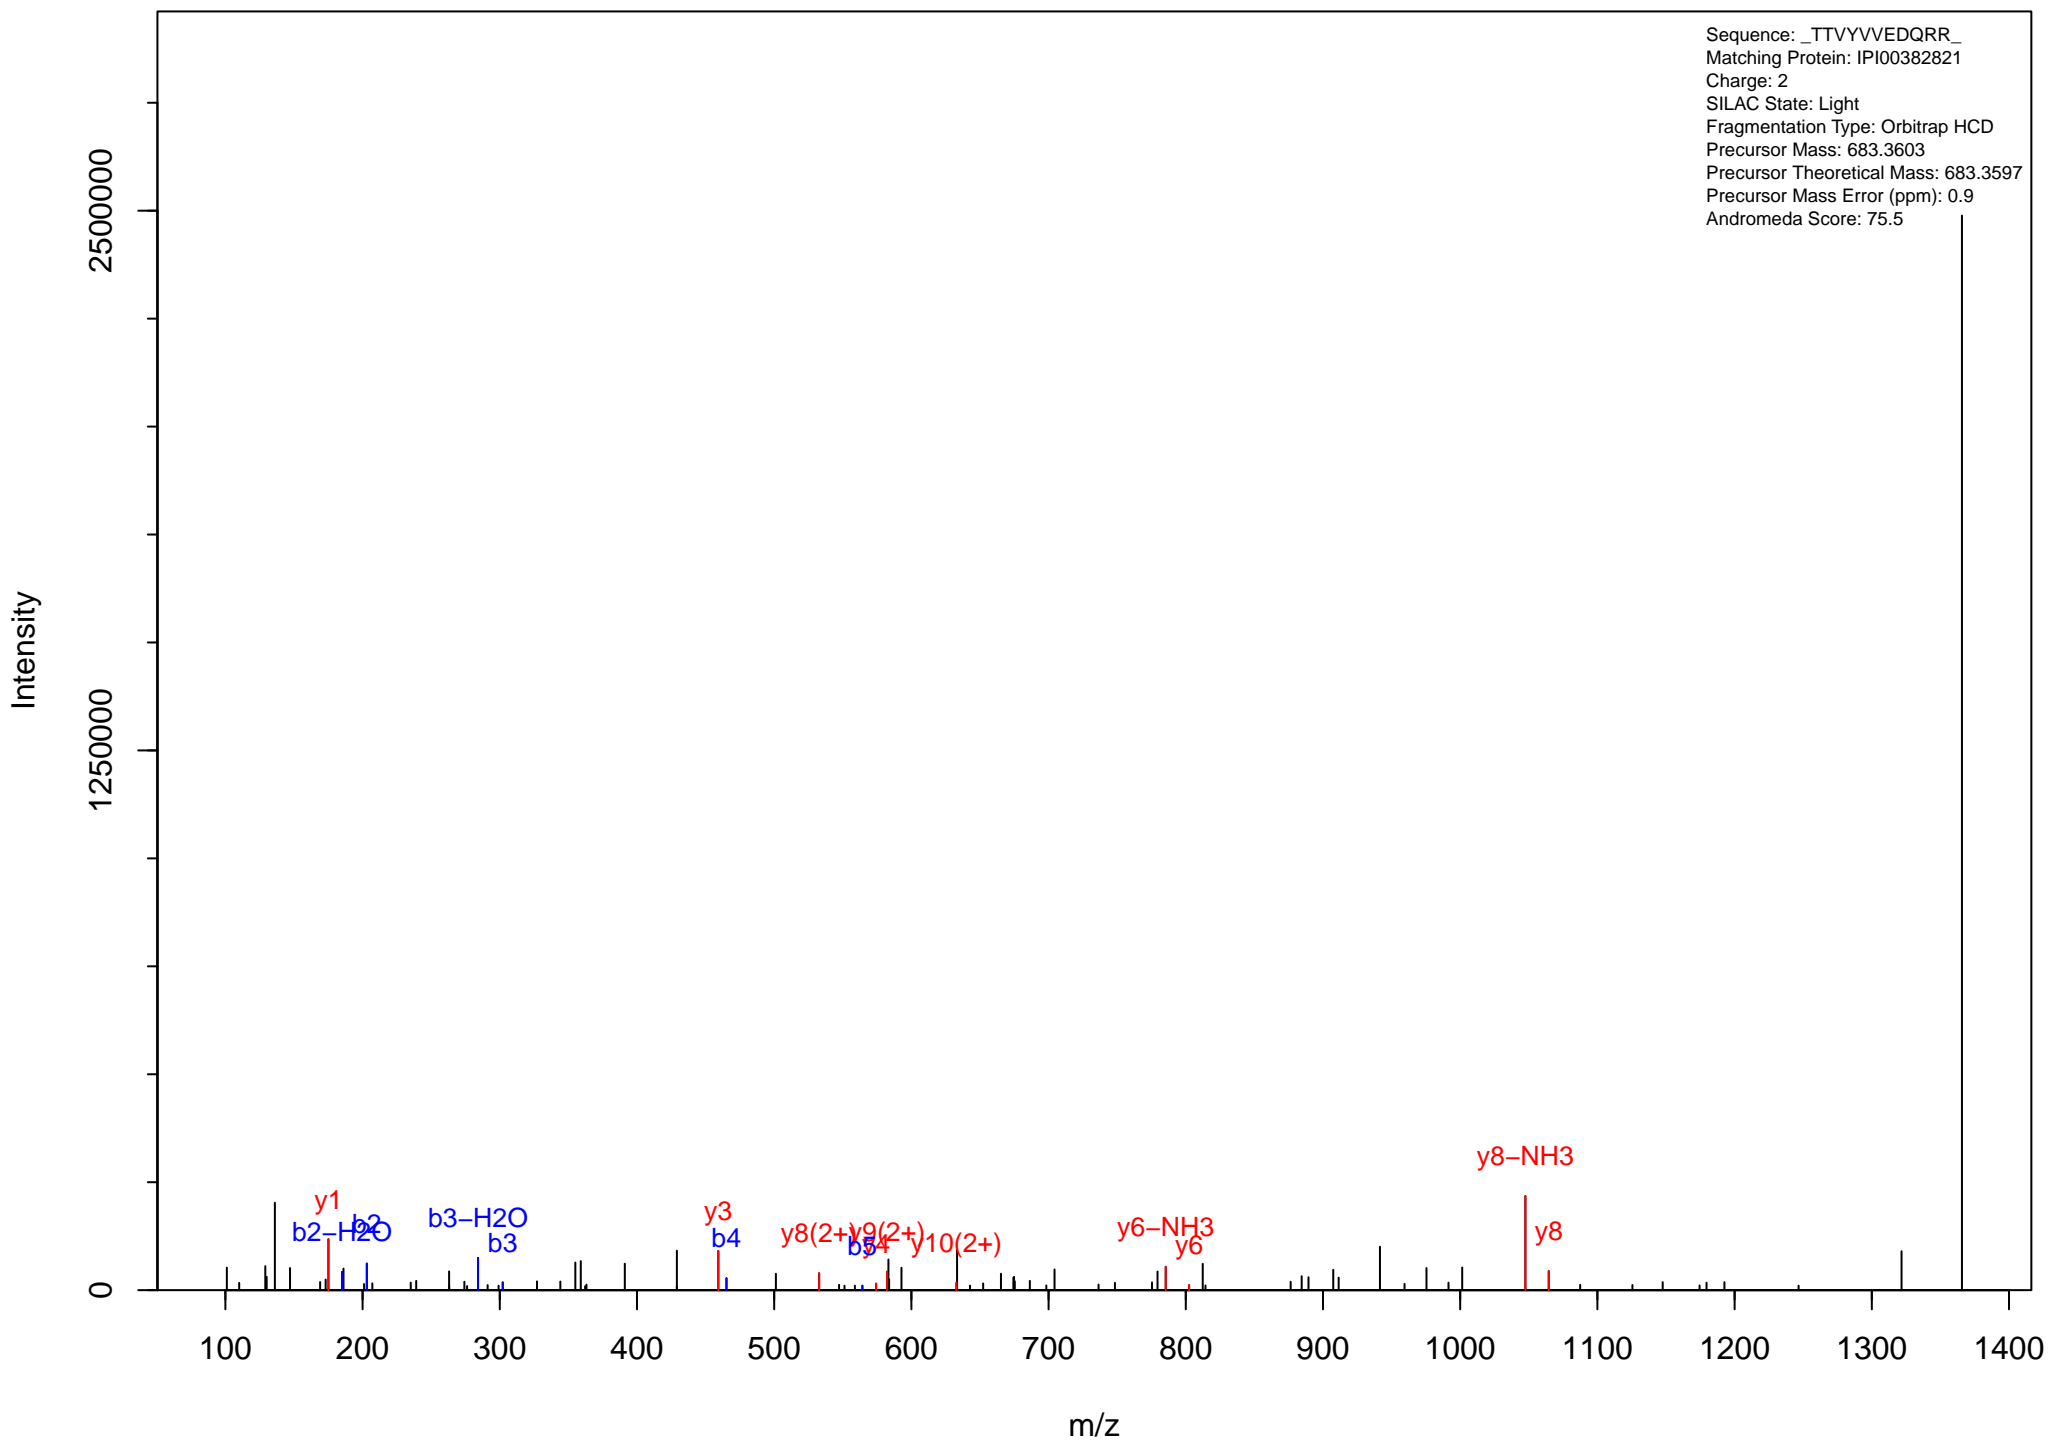

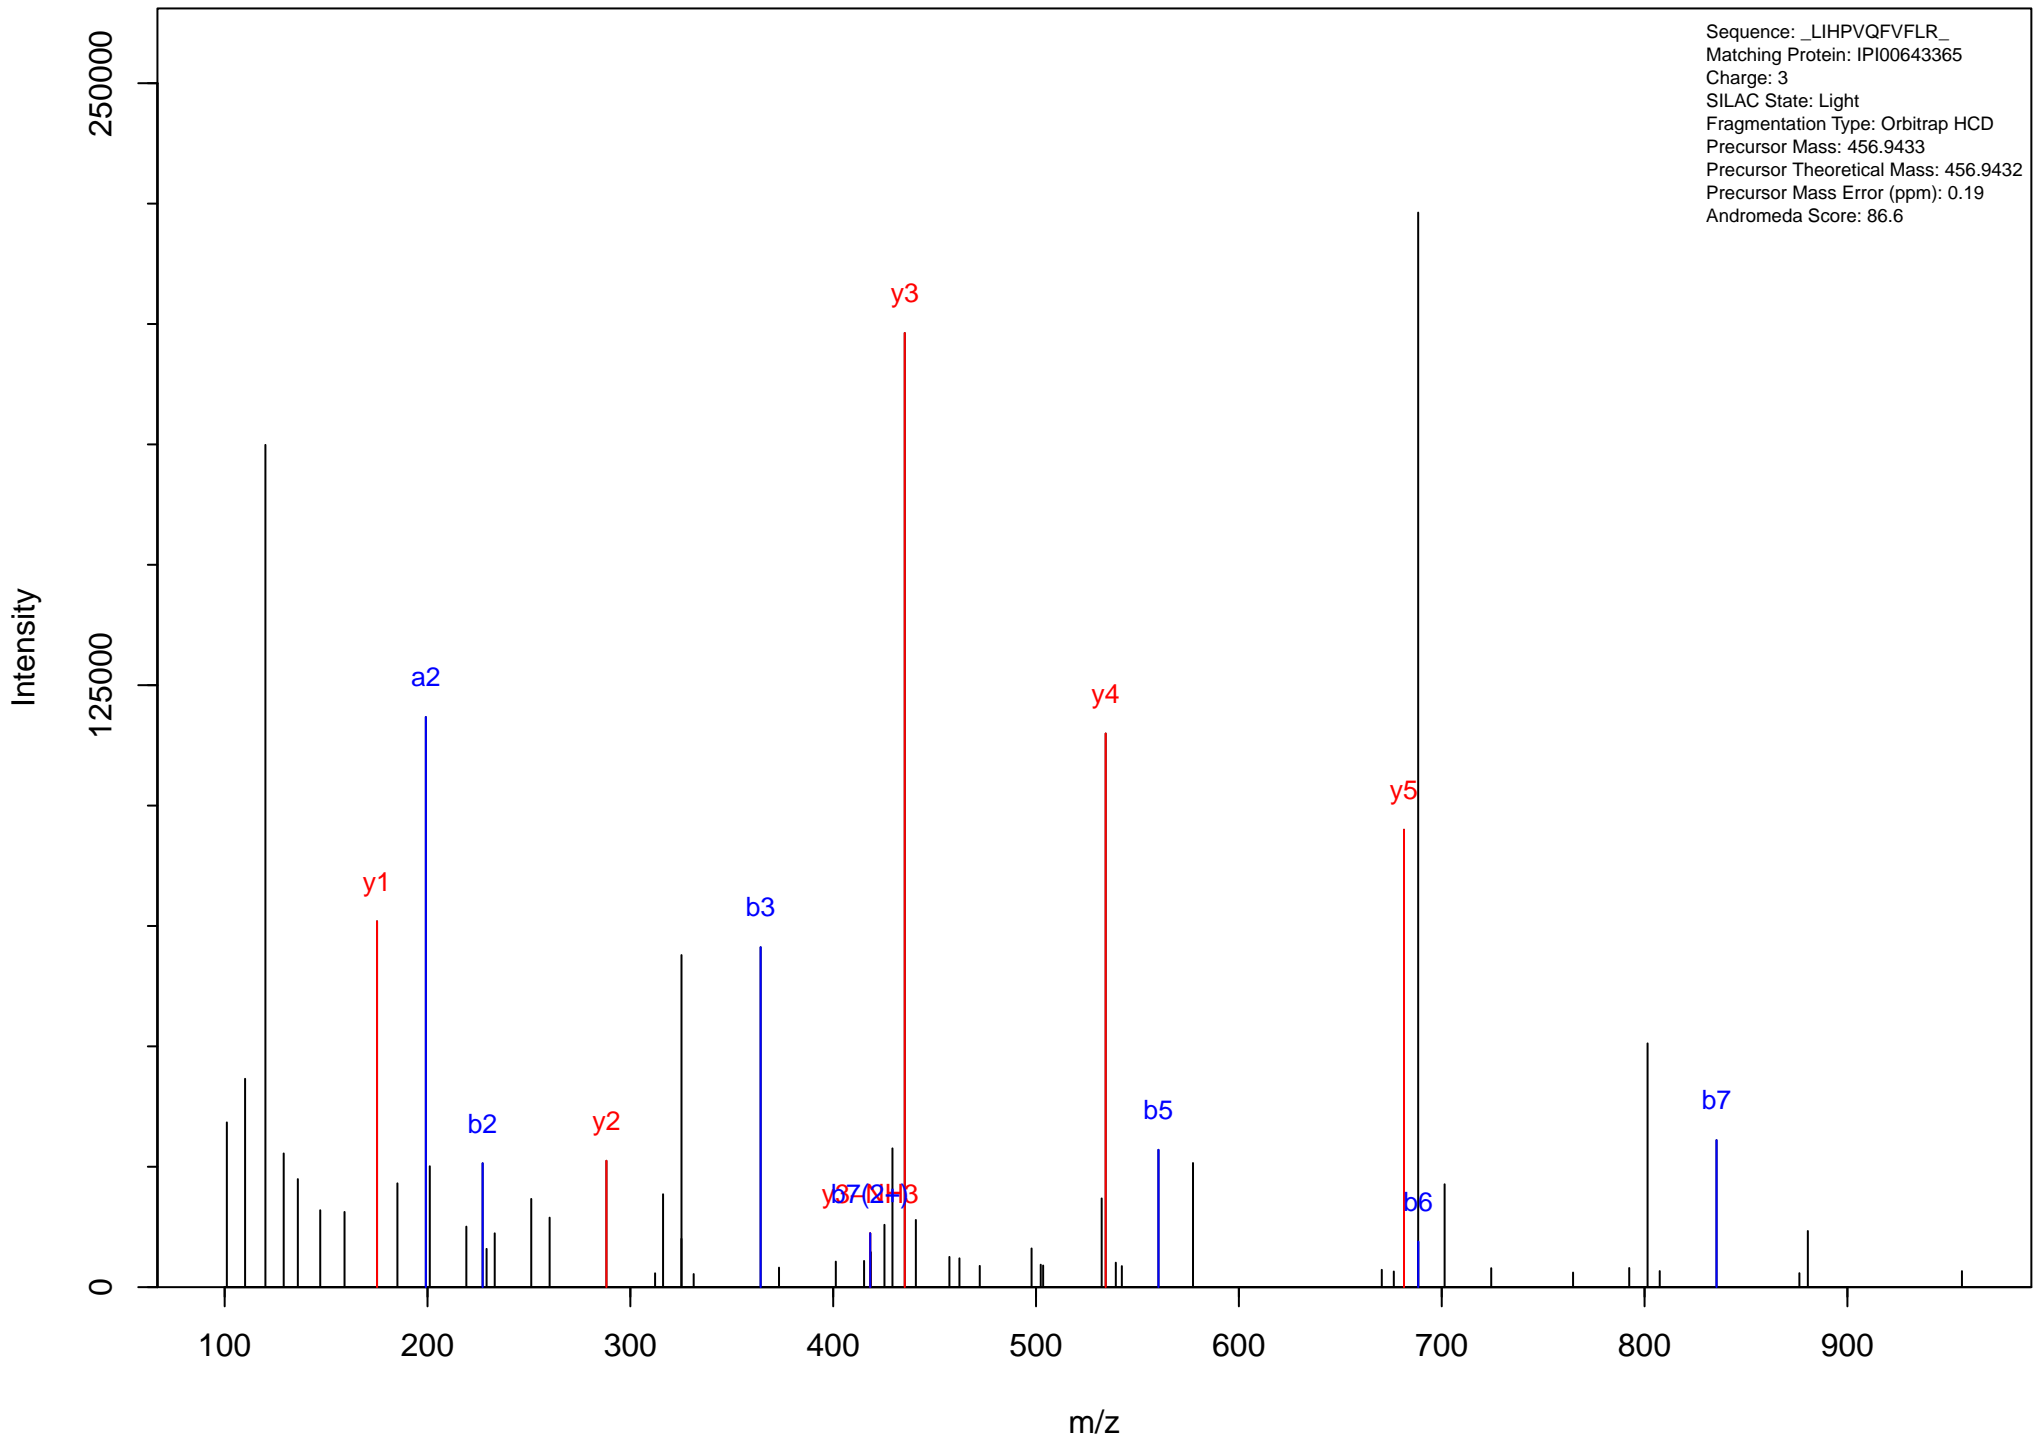

Intensity

8e+05

4e+05

0e+00

Sequence: \_AVESIQAEDESAK\_  
Matching Protein: IPI00607605;IPI00937771;IPI00845303;IPI00556323;IPI00953215;IPI00419963;IPI00845323  
Charge: 2  
SILAC State: Light  
Fragmentation Type: Orbitrap HCD  
Precursor Mass: 688.8304  
Precursor Theoretical Mass: 688.8306  
Precursor Mass Error (ppm): -0.34  
Andromeda Score: 152

100 200 300 400 500 600 700 800 900 1000 1100 1200 1300 1400

m/z

a2

b2

y1

y2-NH3

y2

y3

b4-H2O

b3

y3

b4

y4

b5-H2O

y5

y9(2+)

b5

b6

y6

y7

y8-NH3

y8

y9

y10

y10-NH3

y11

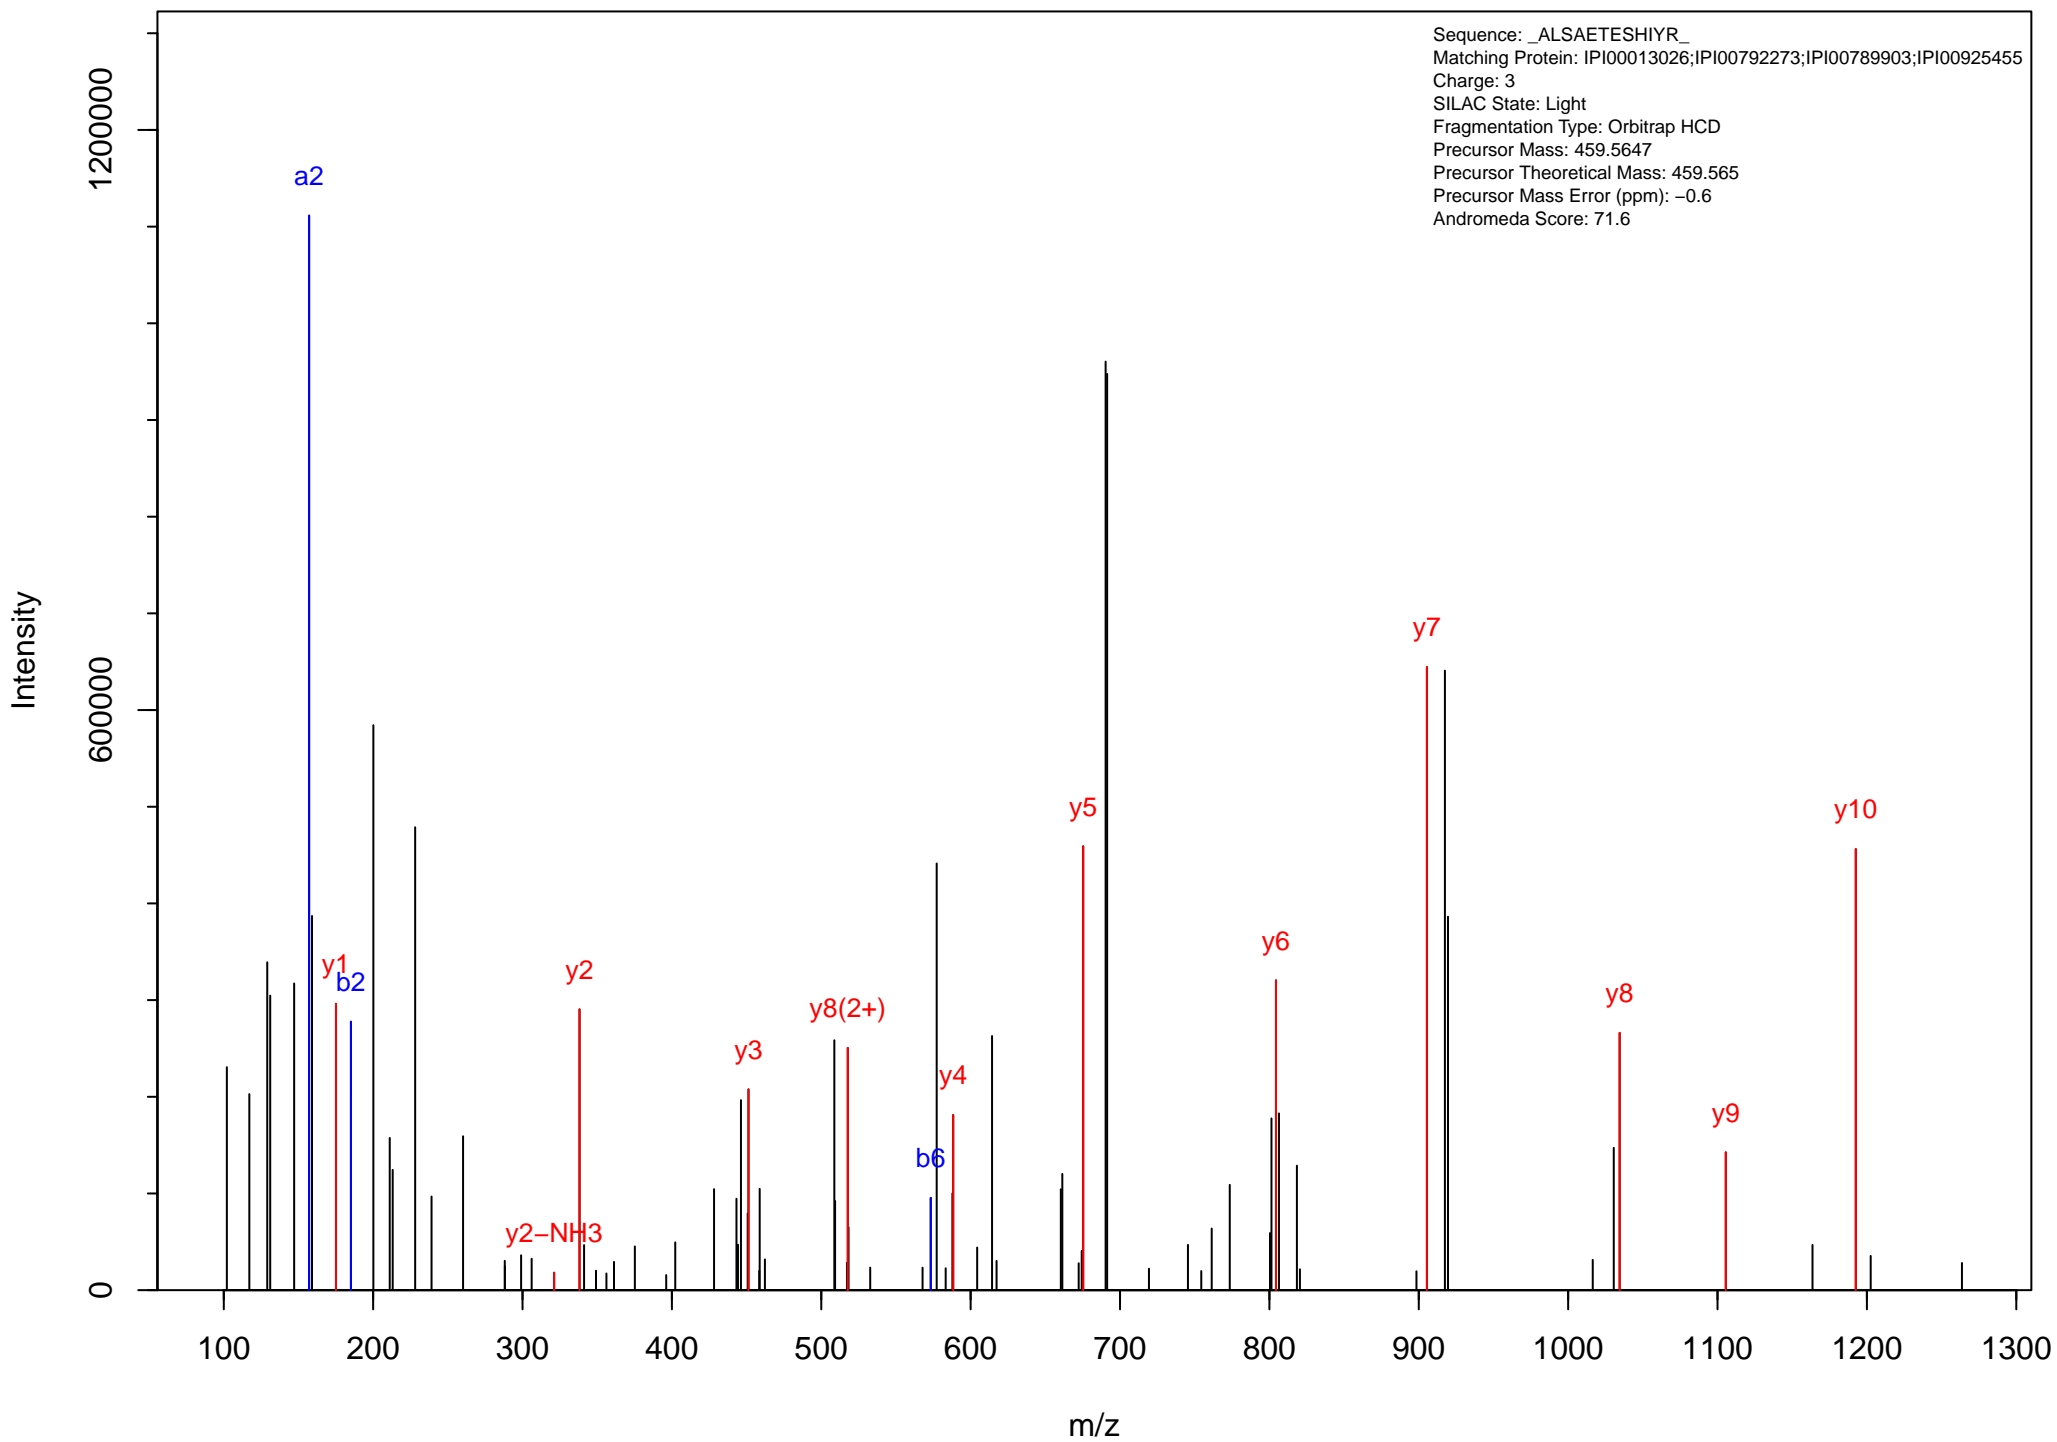

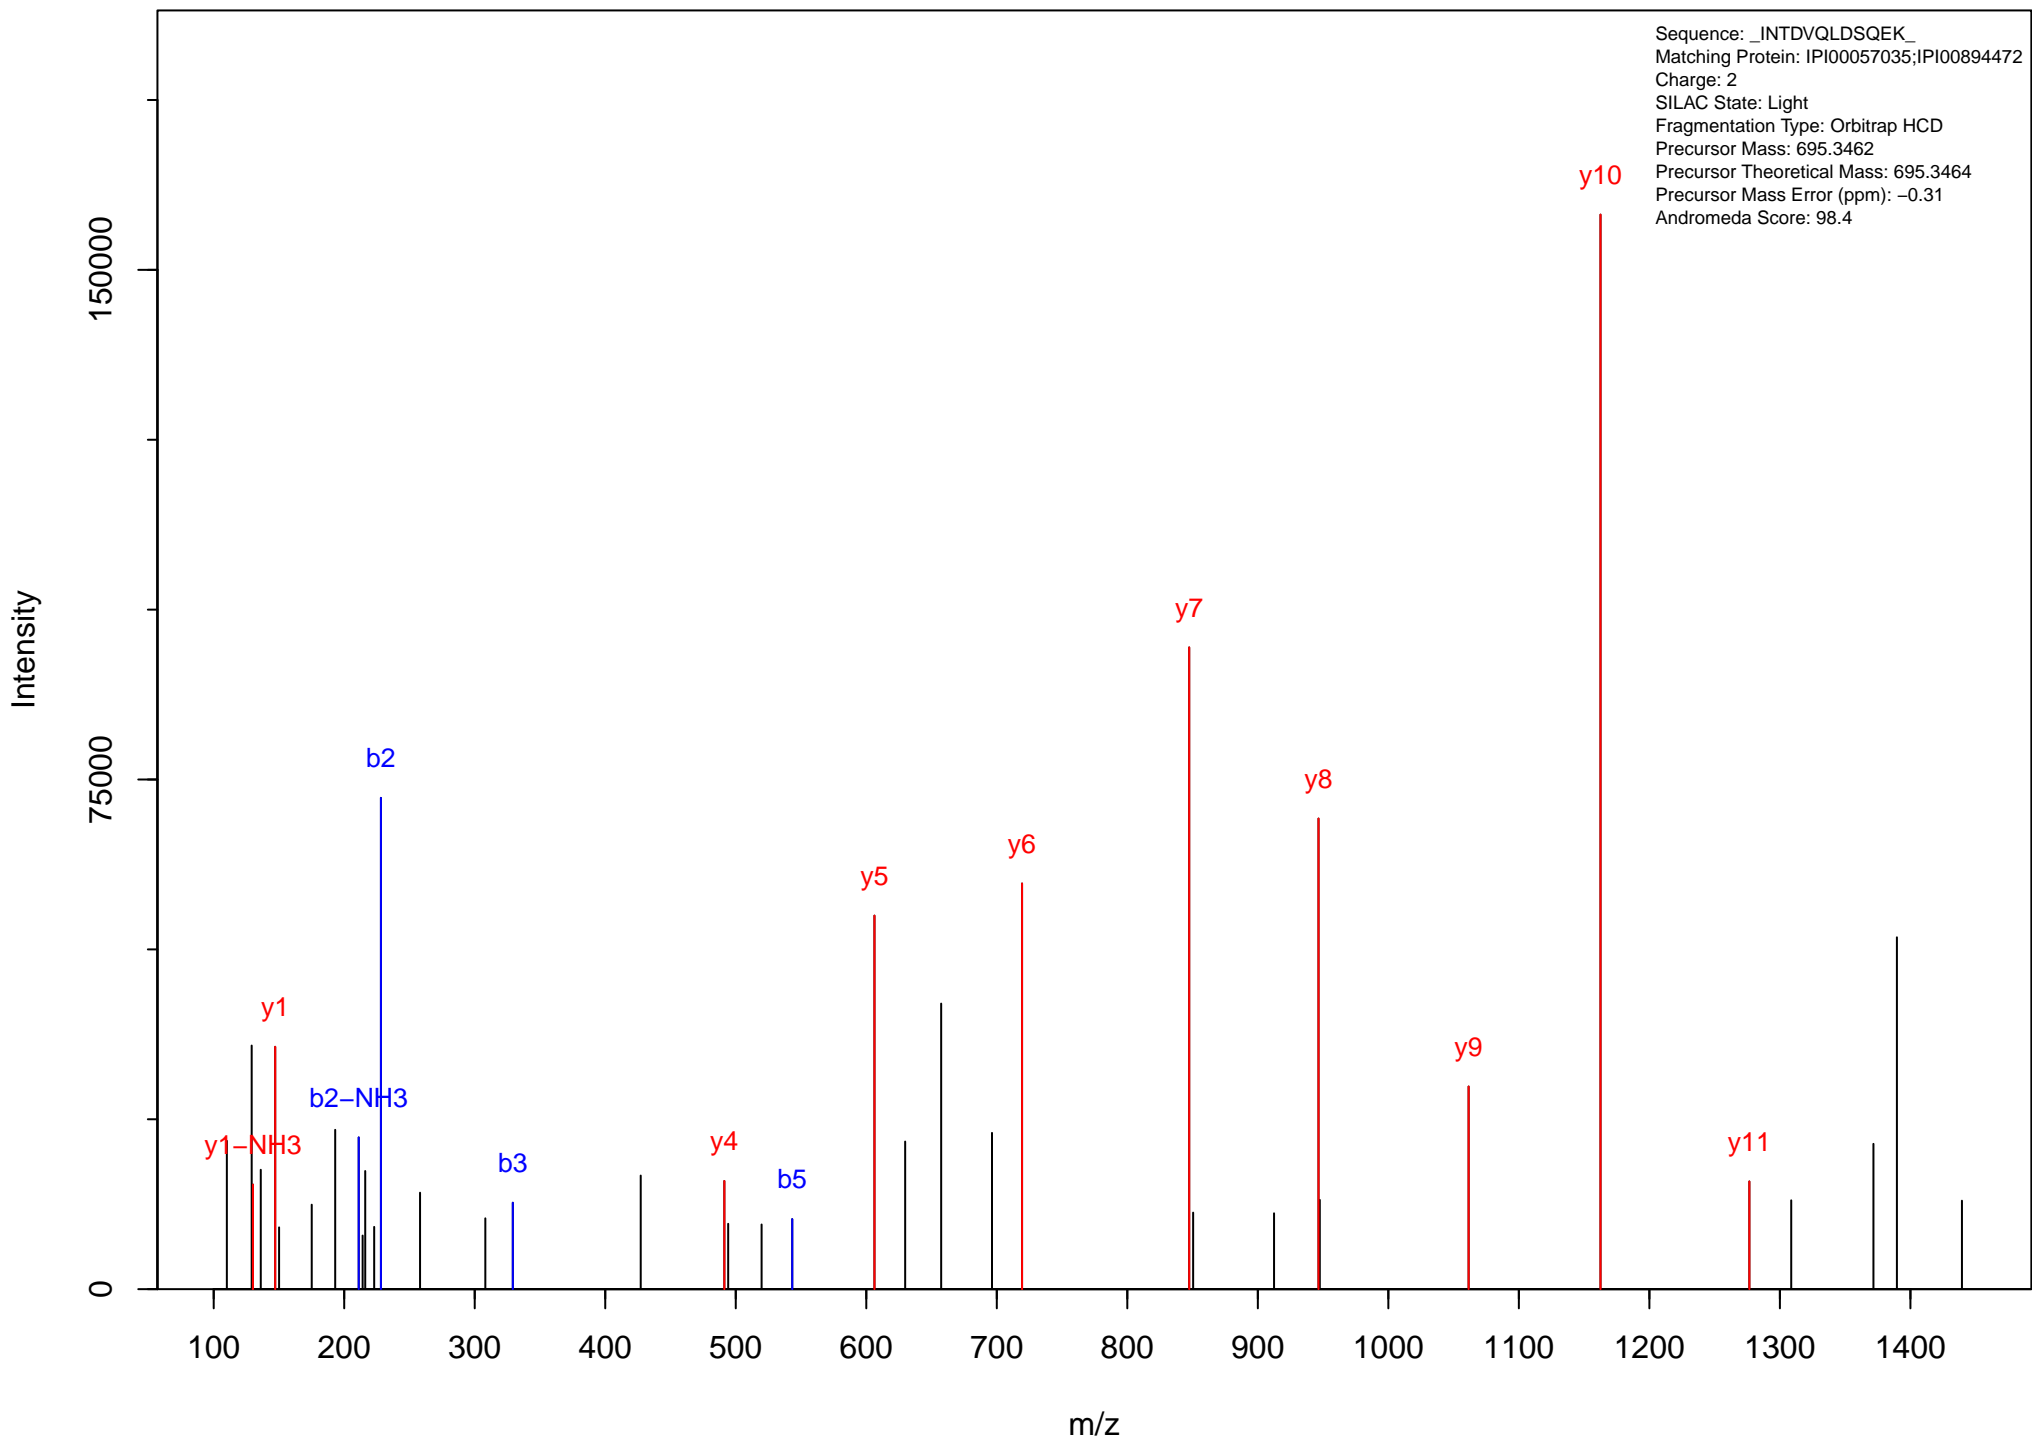

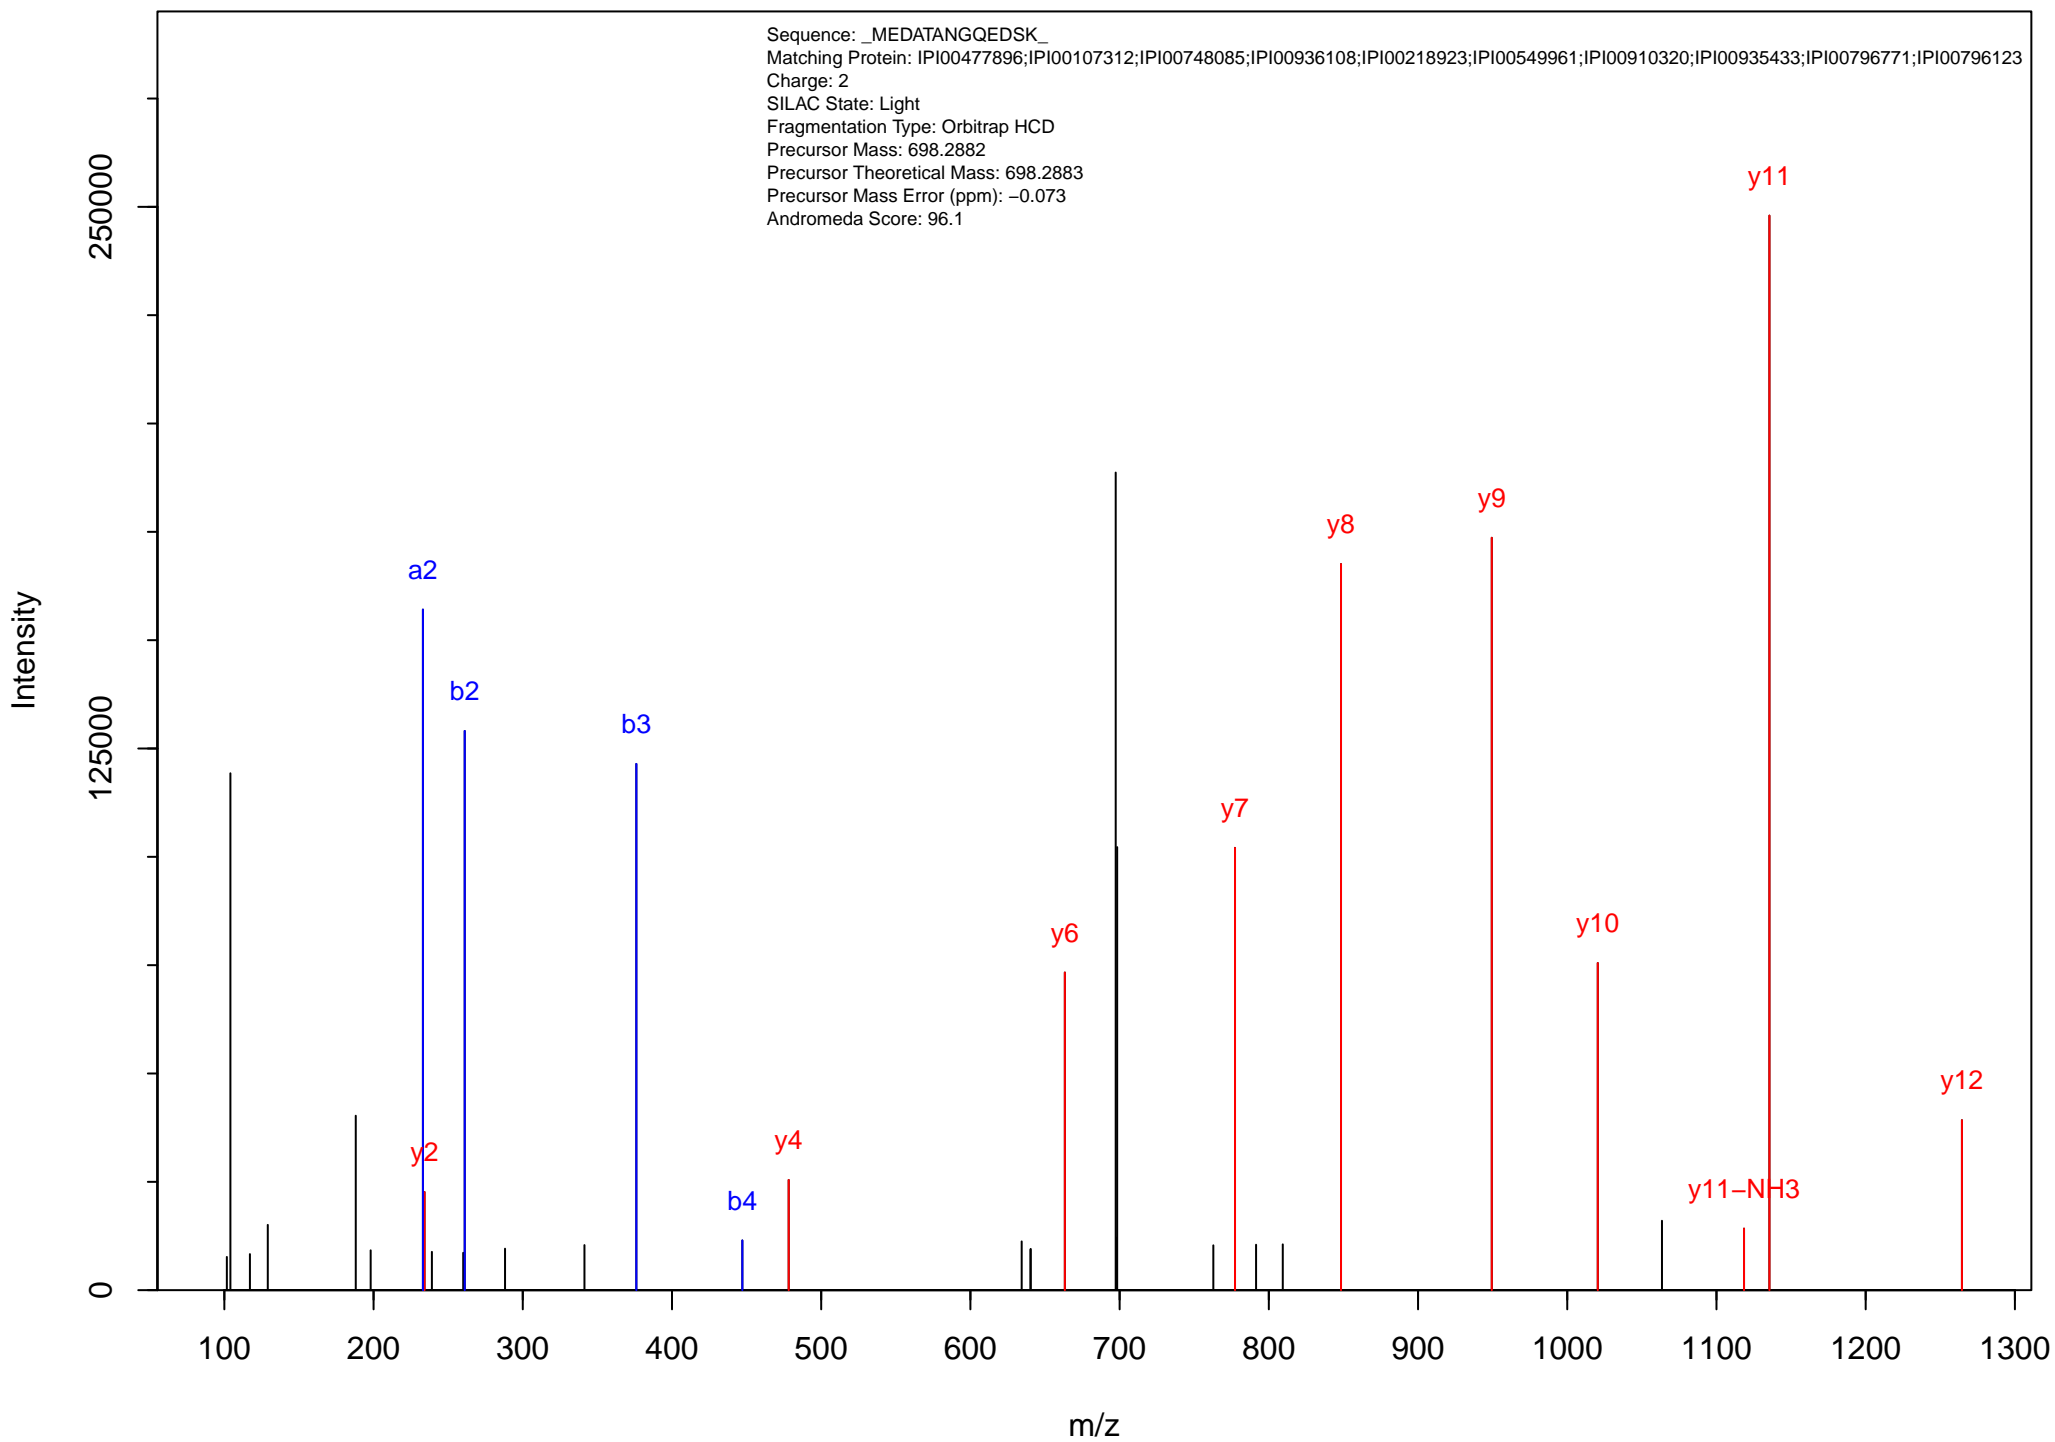

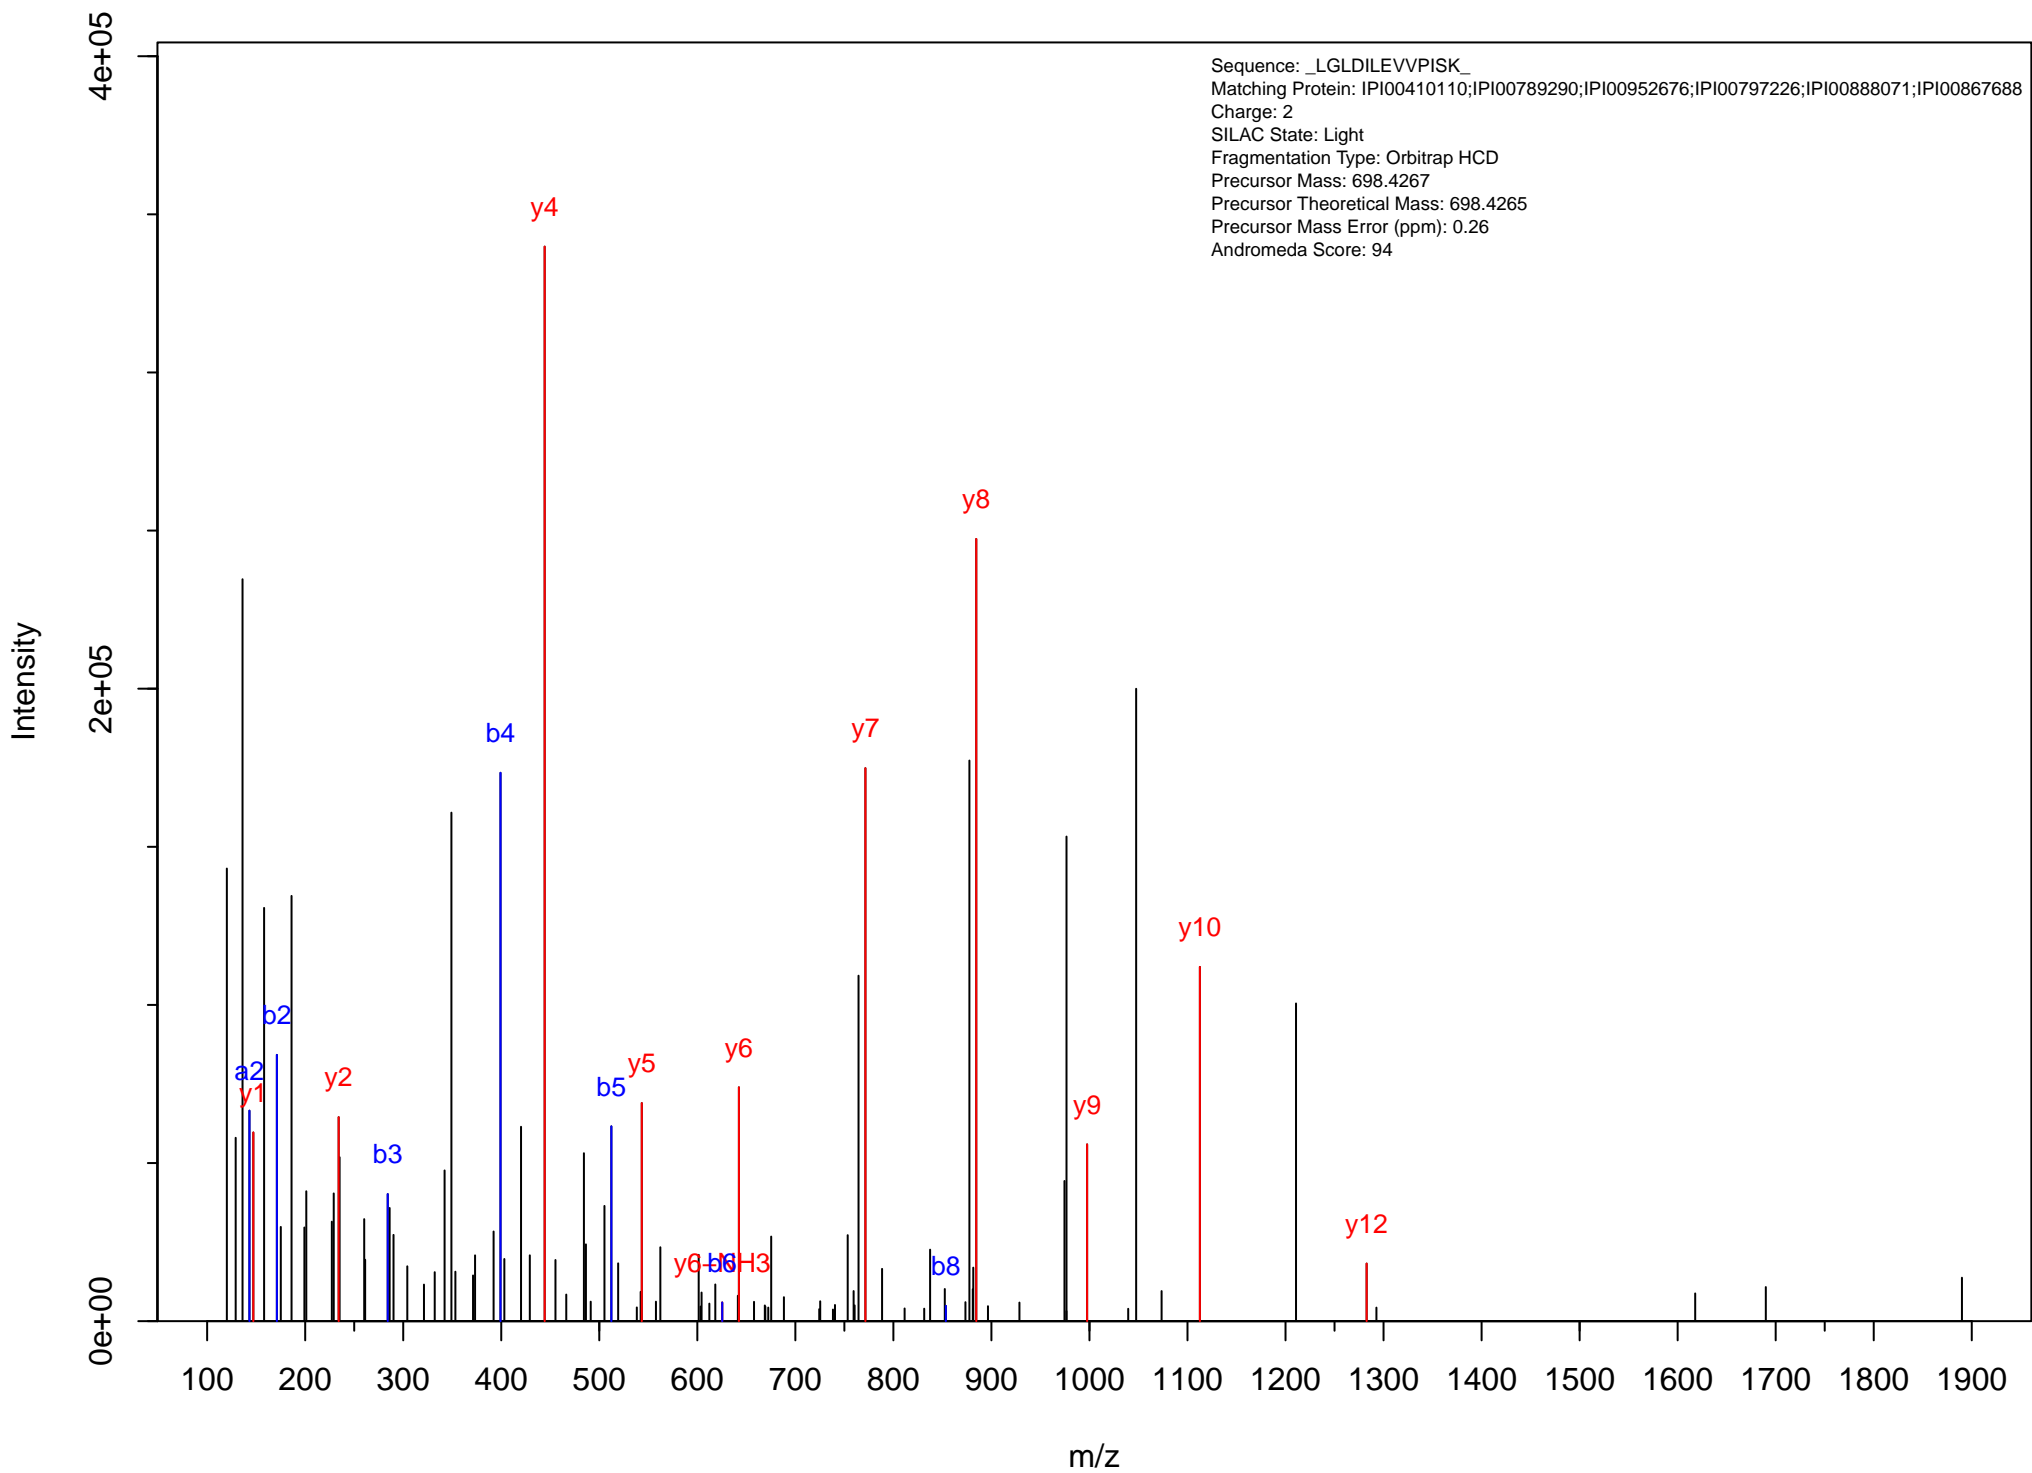

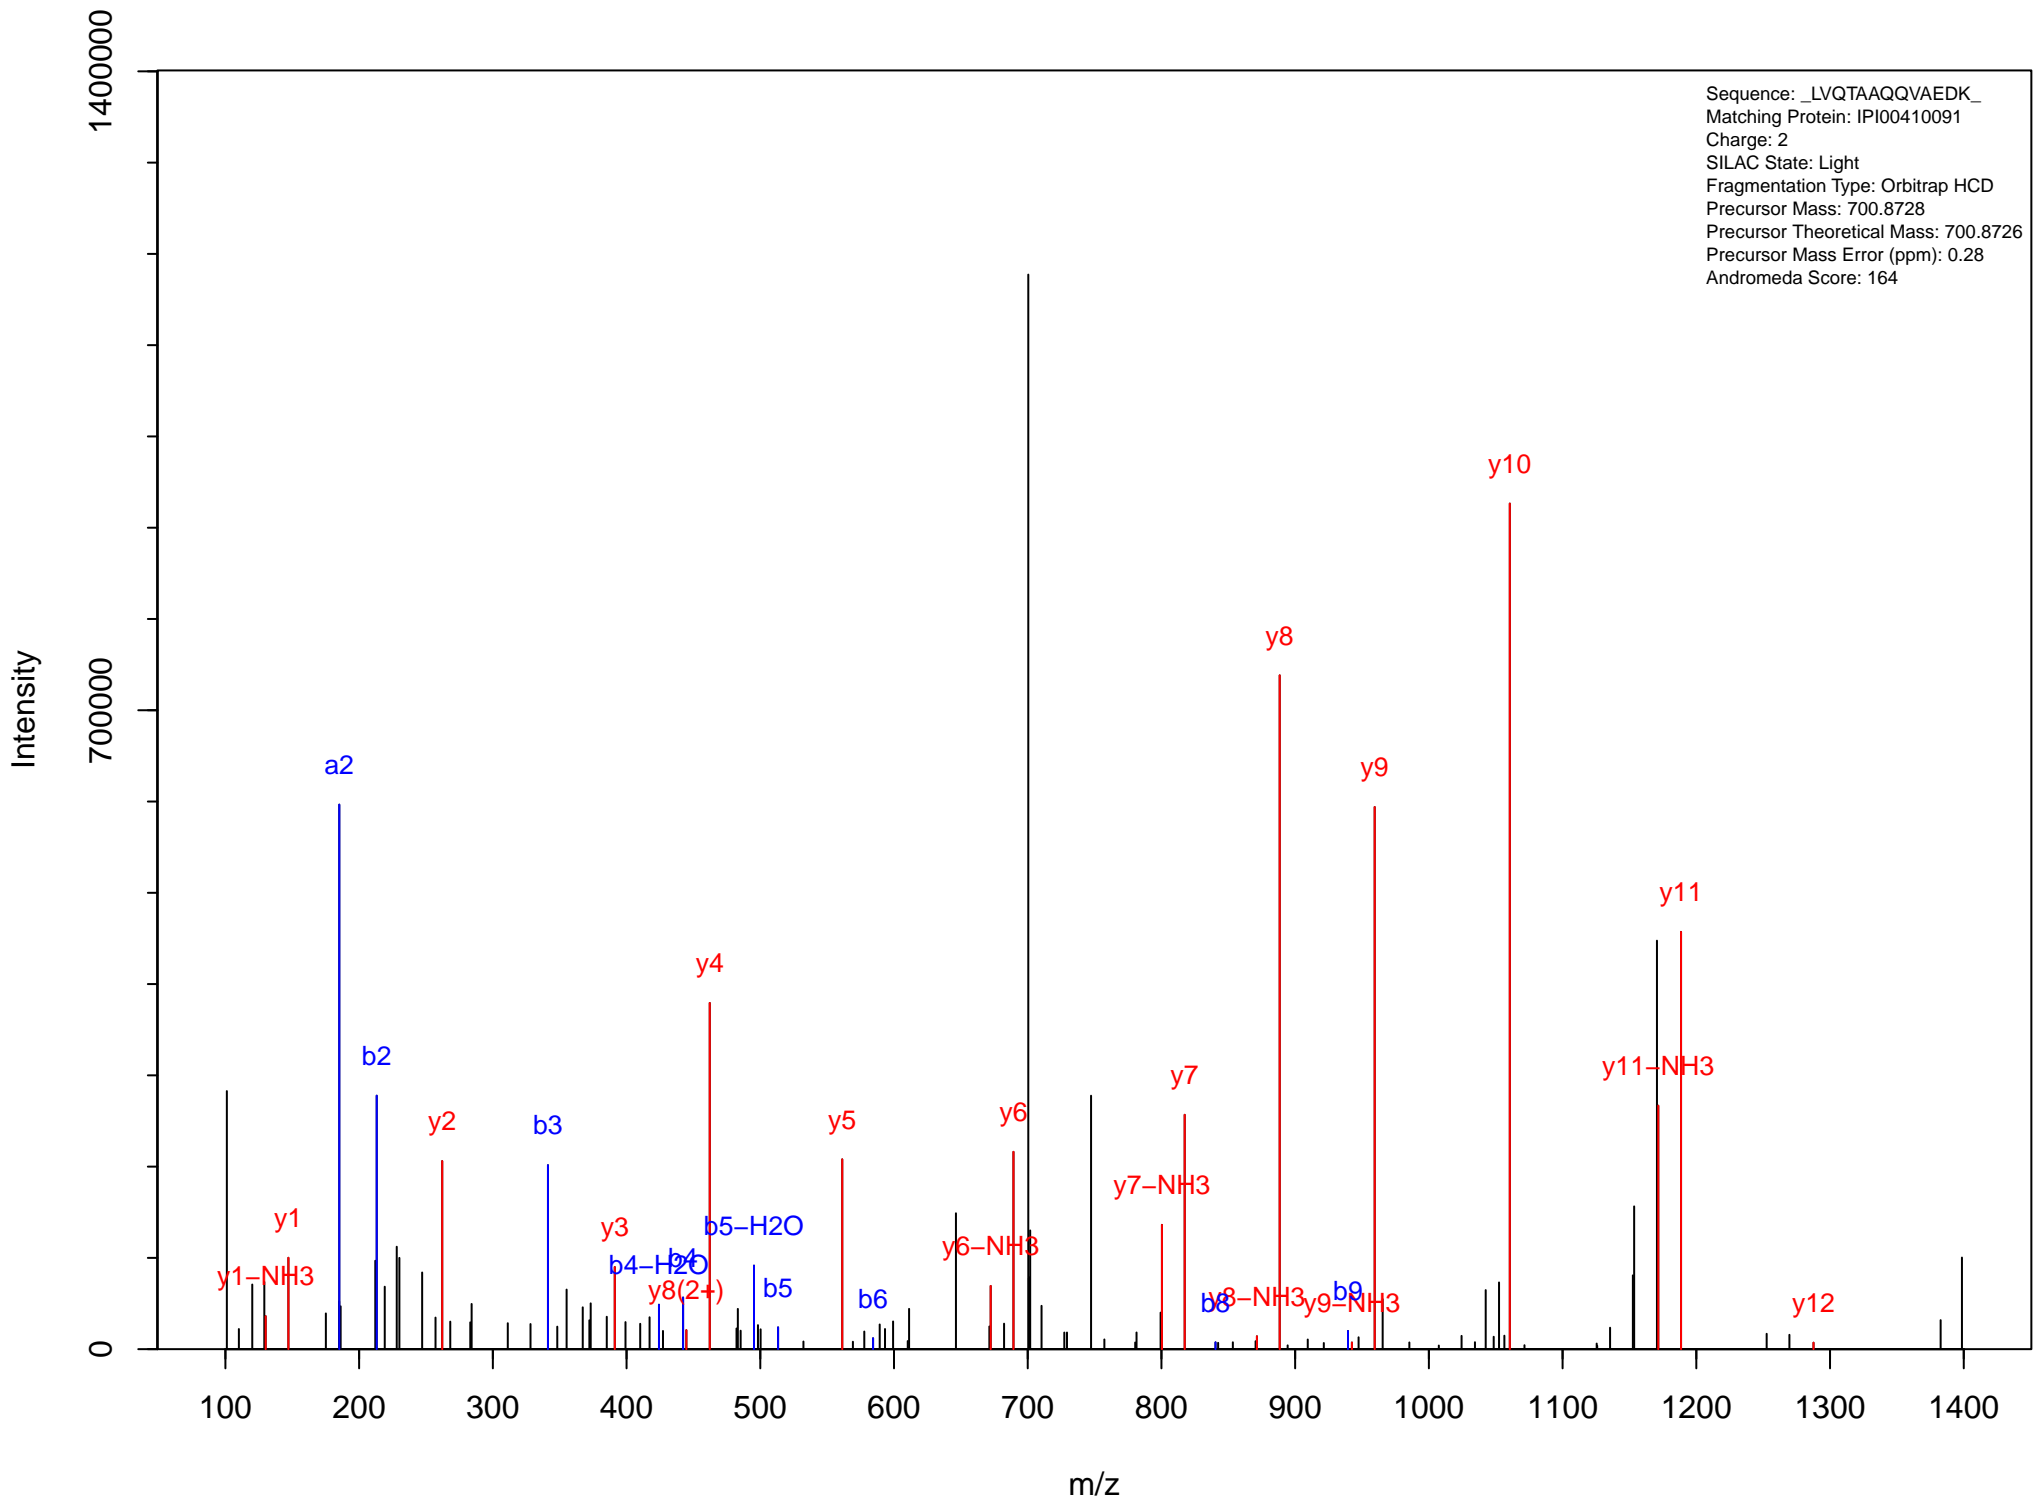

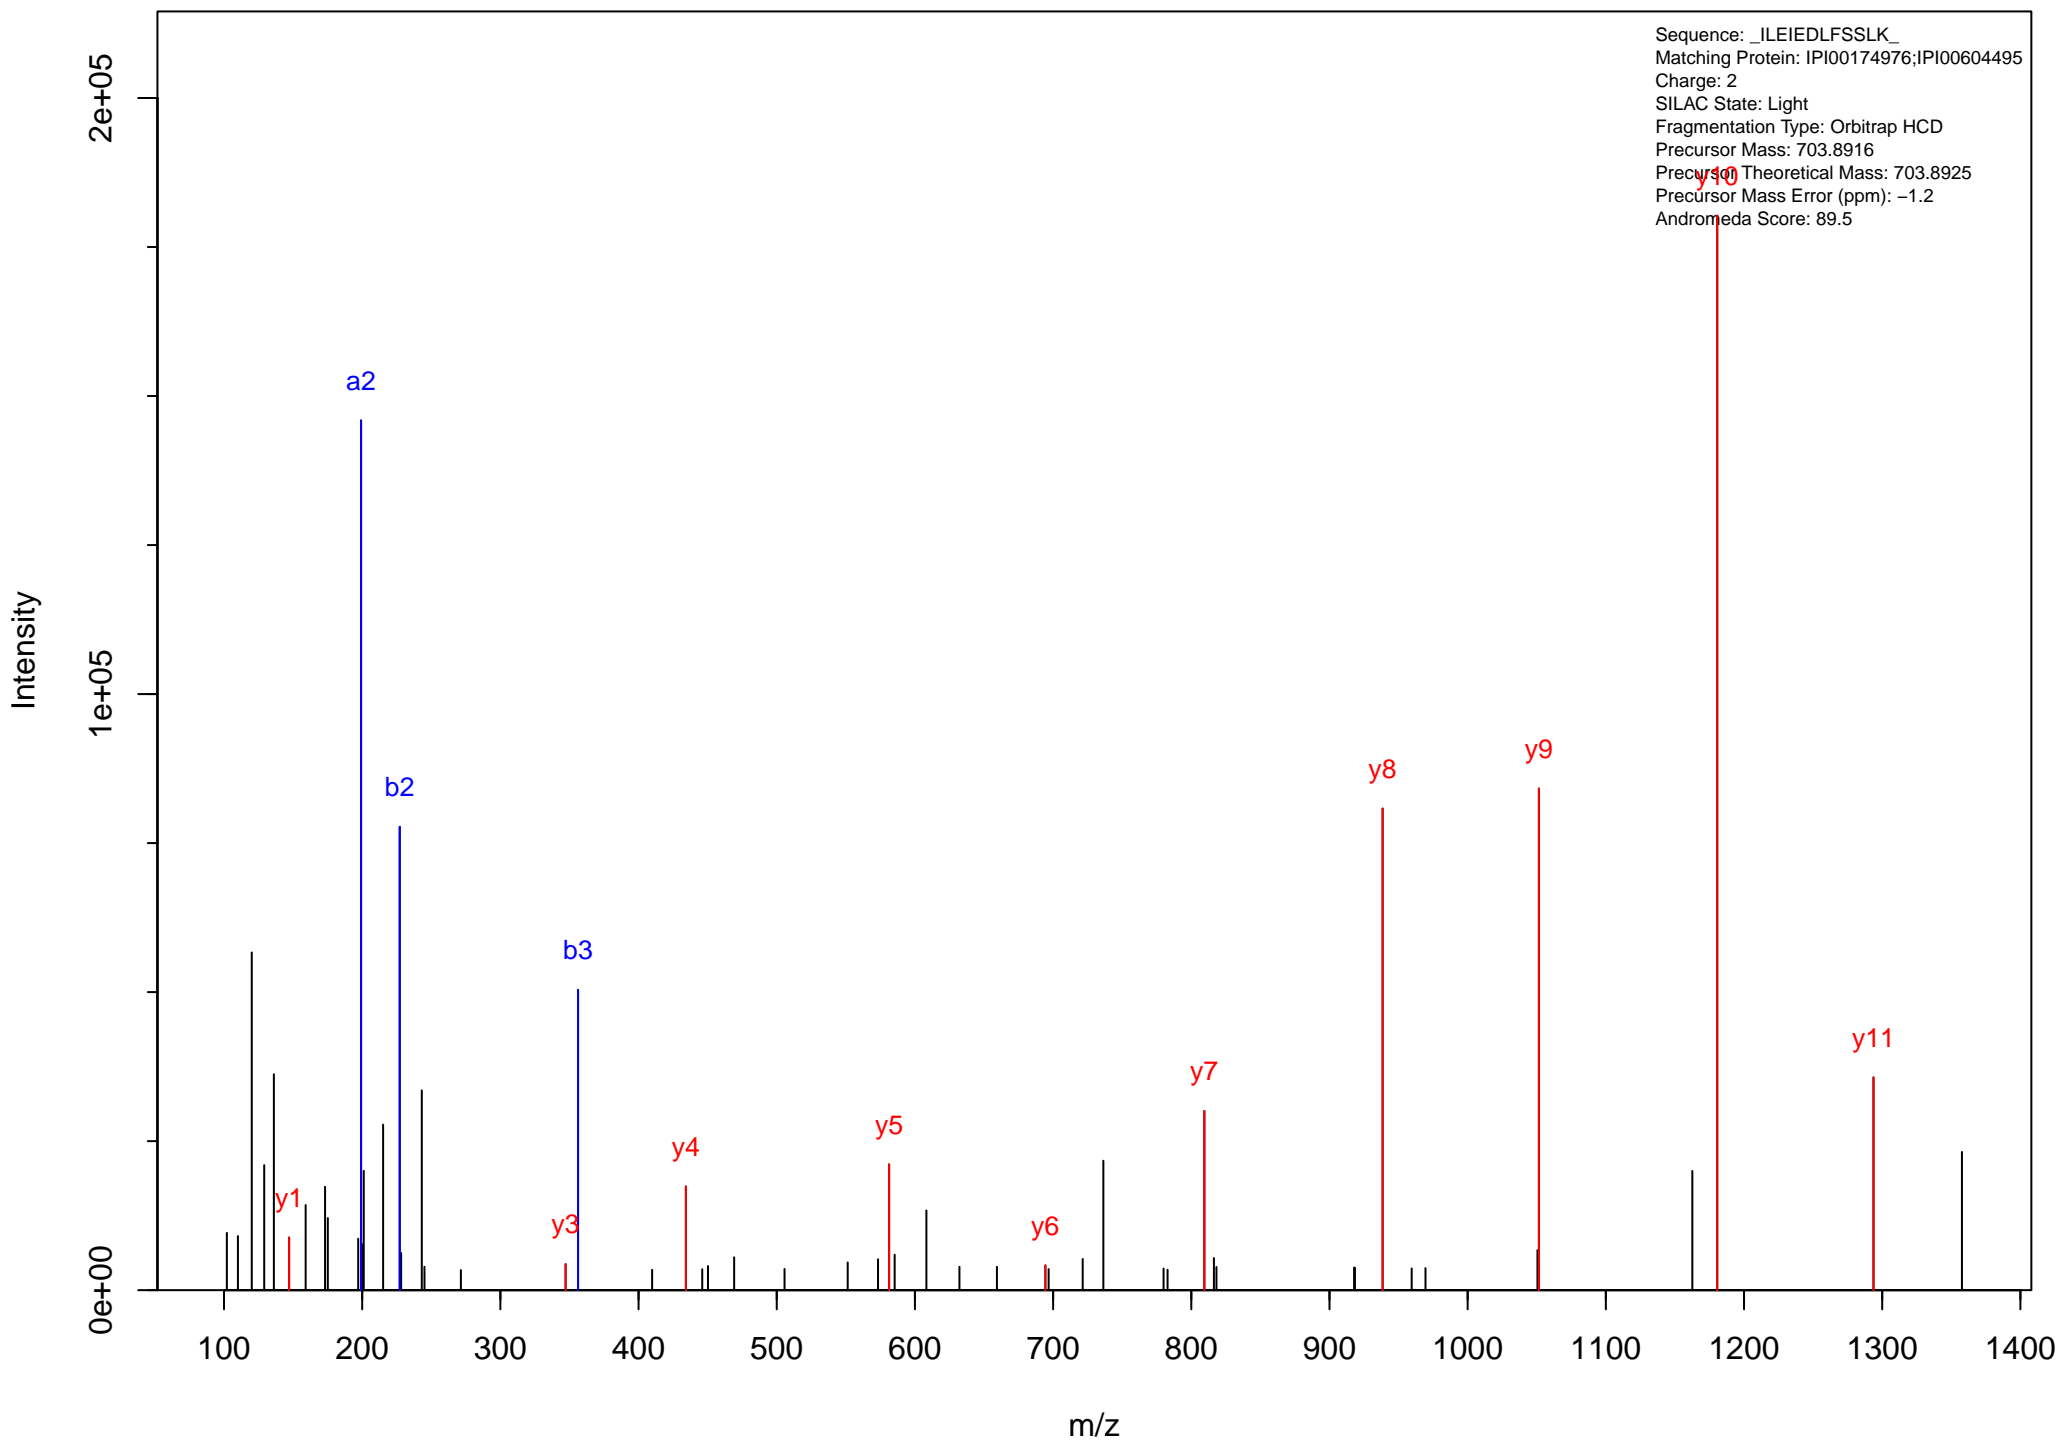

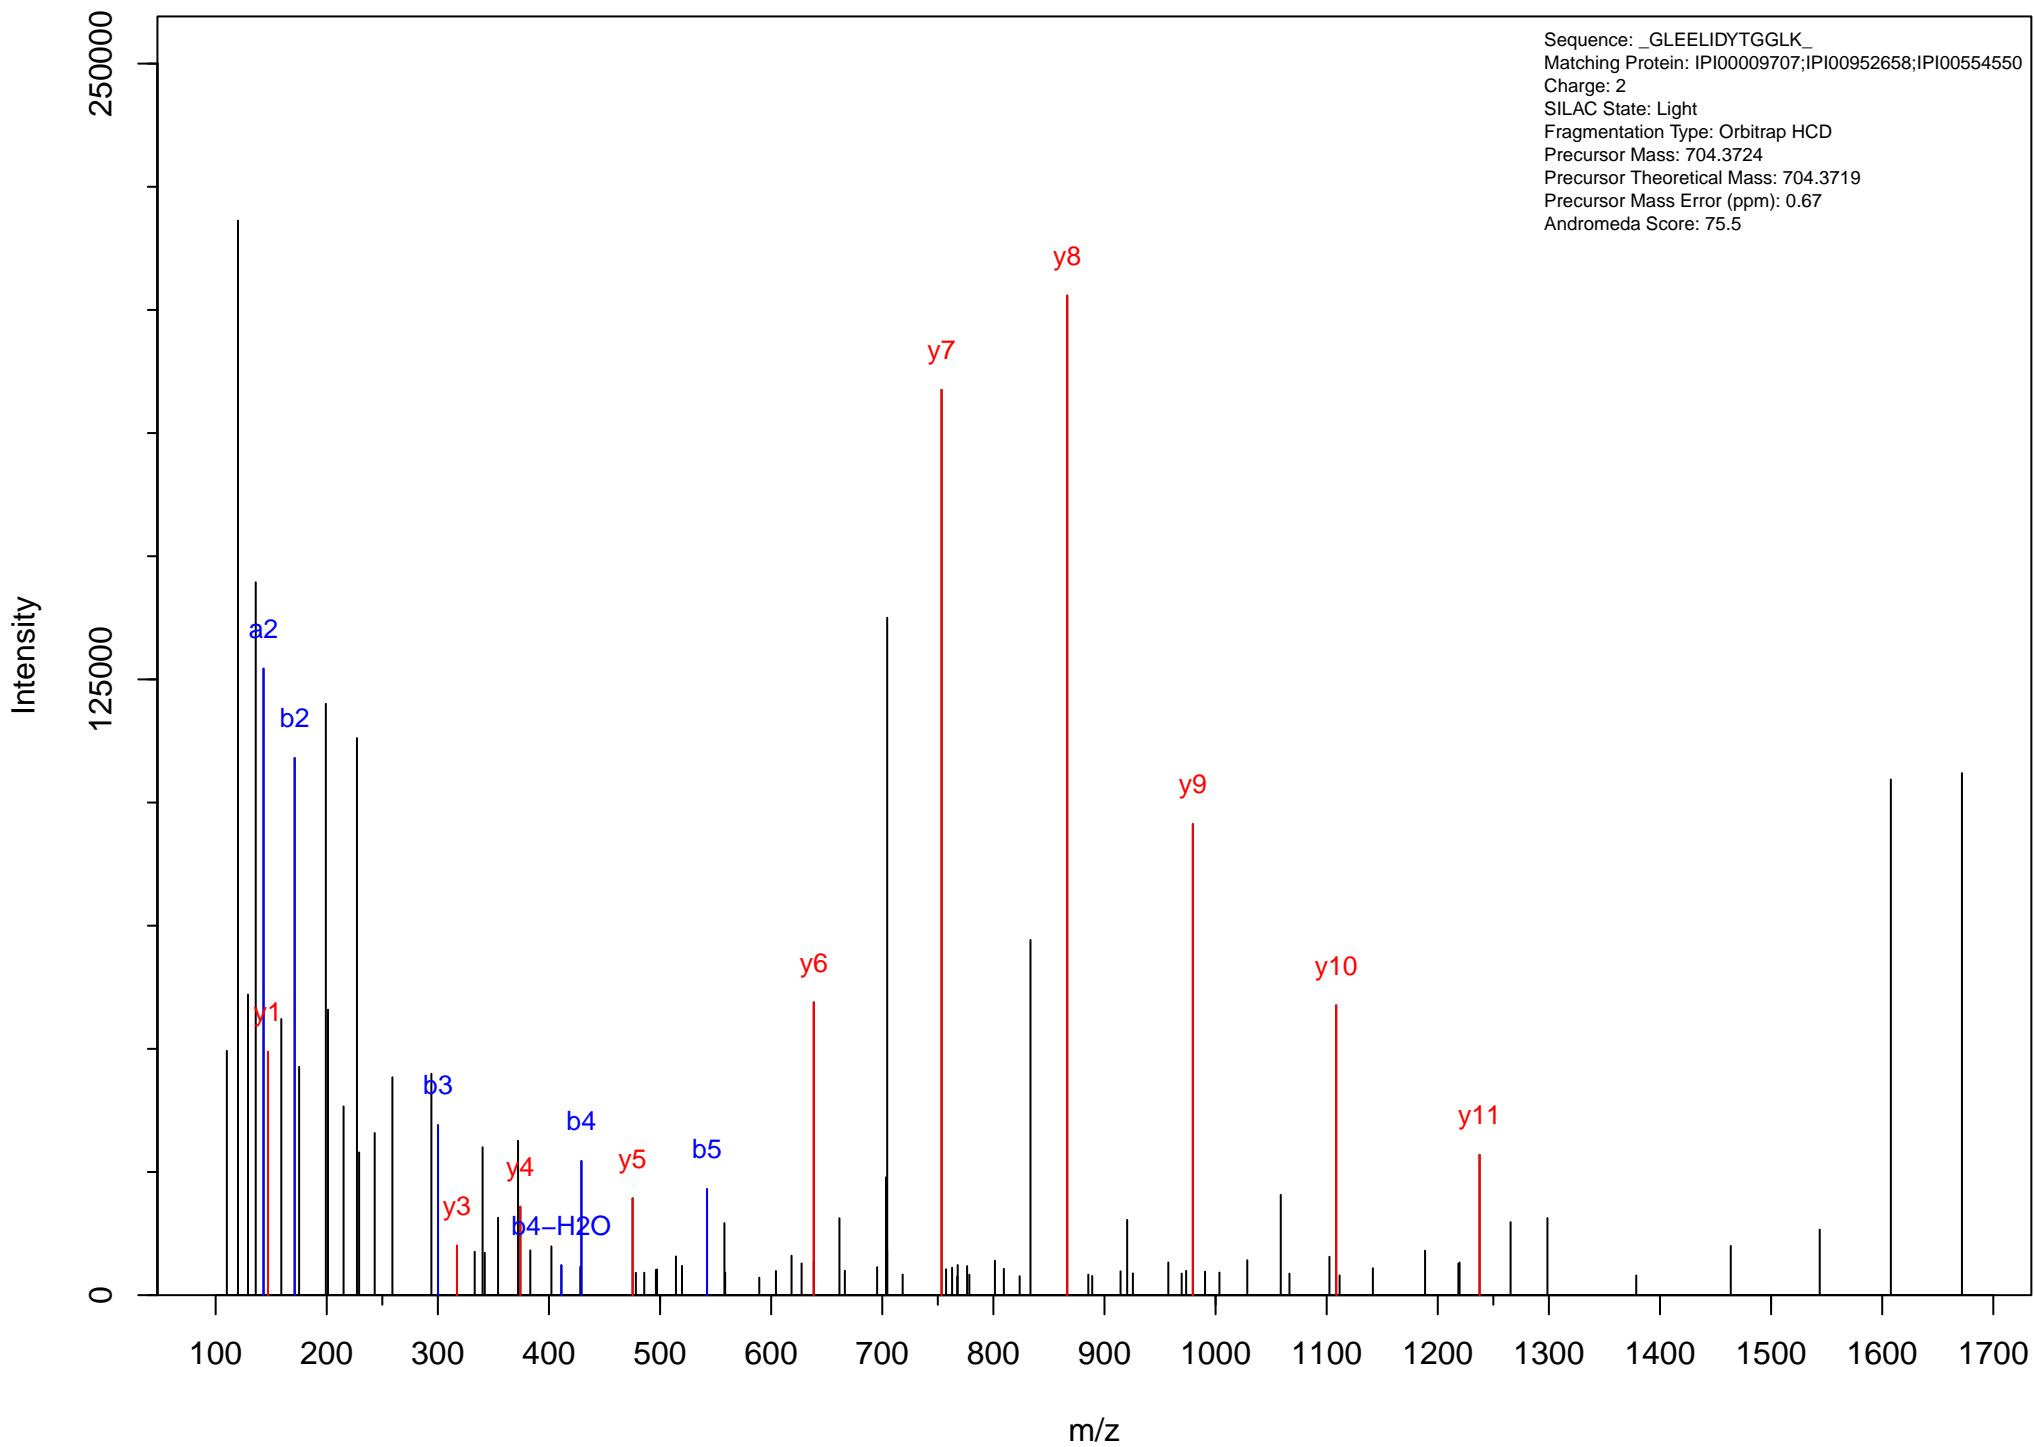

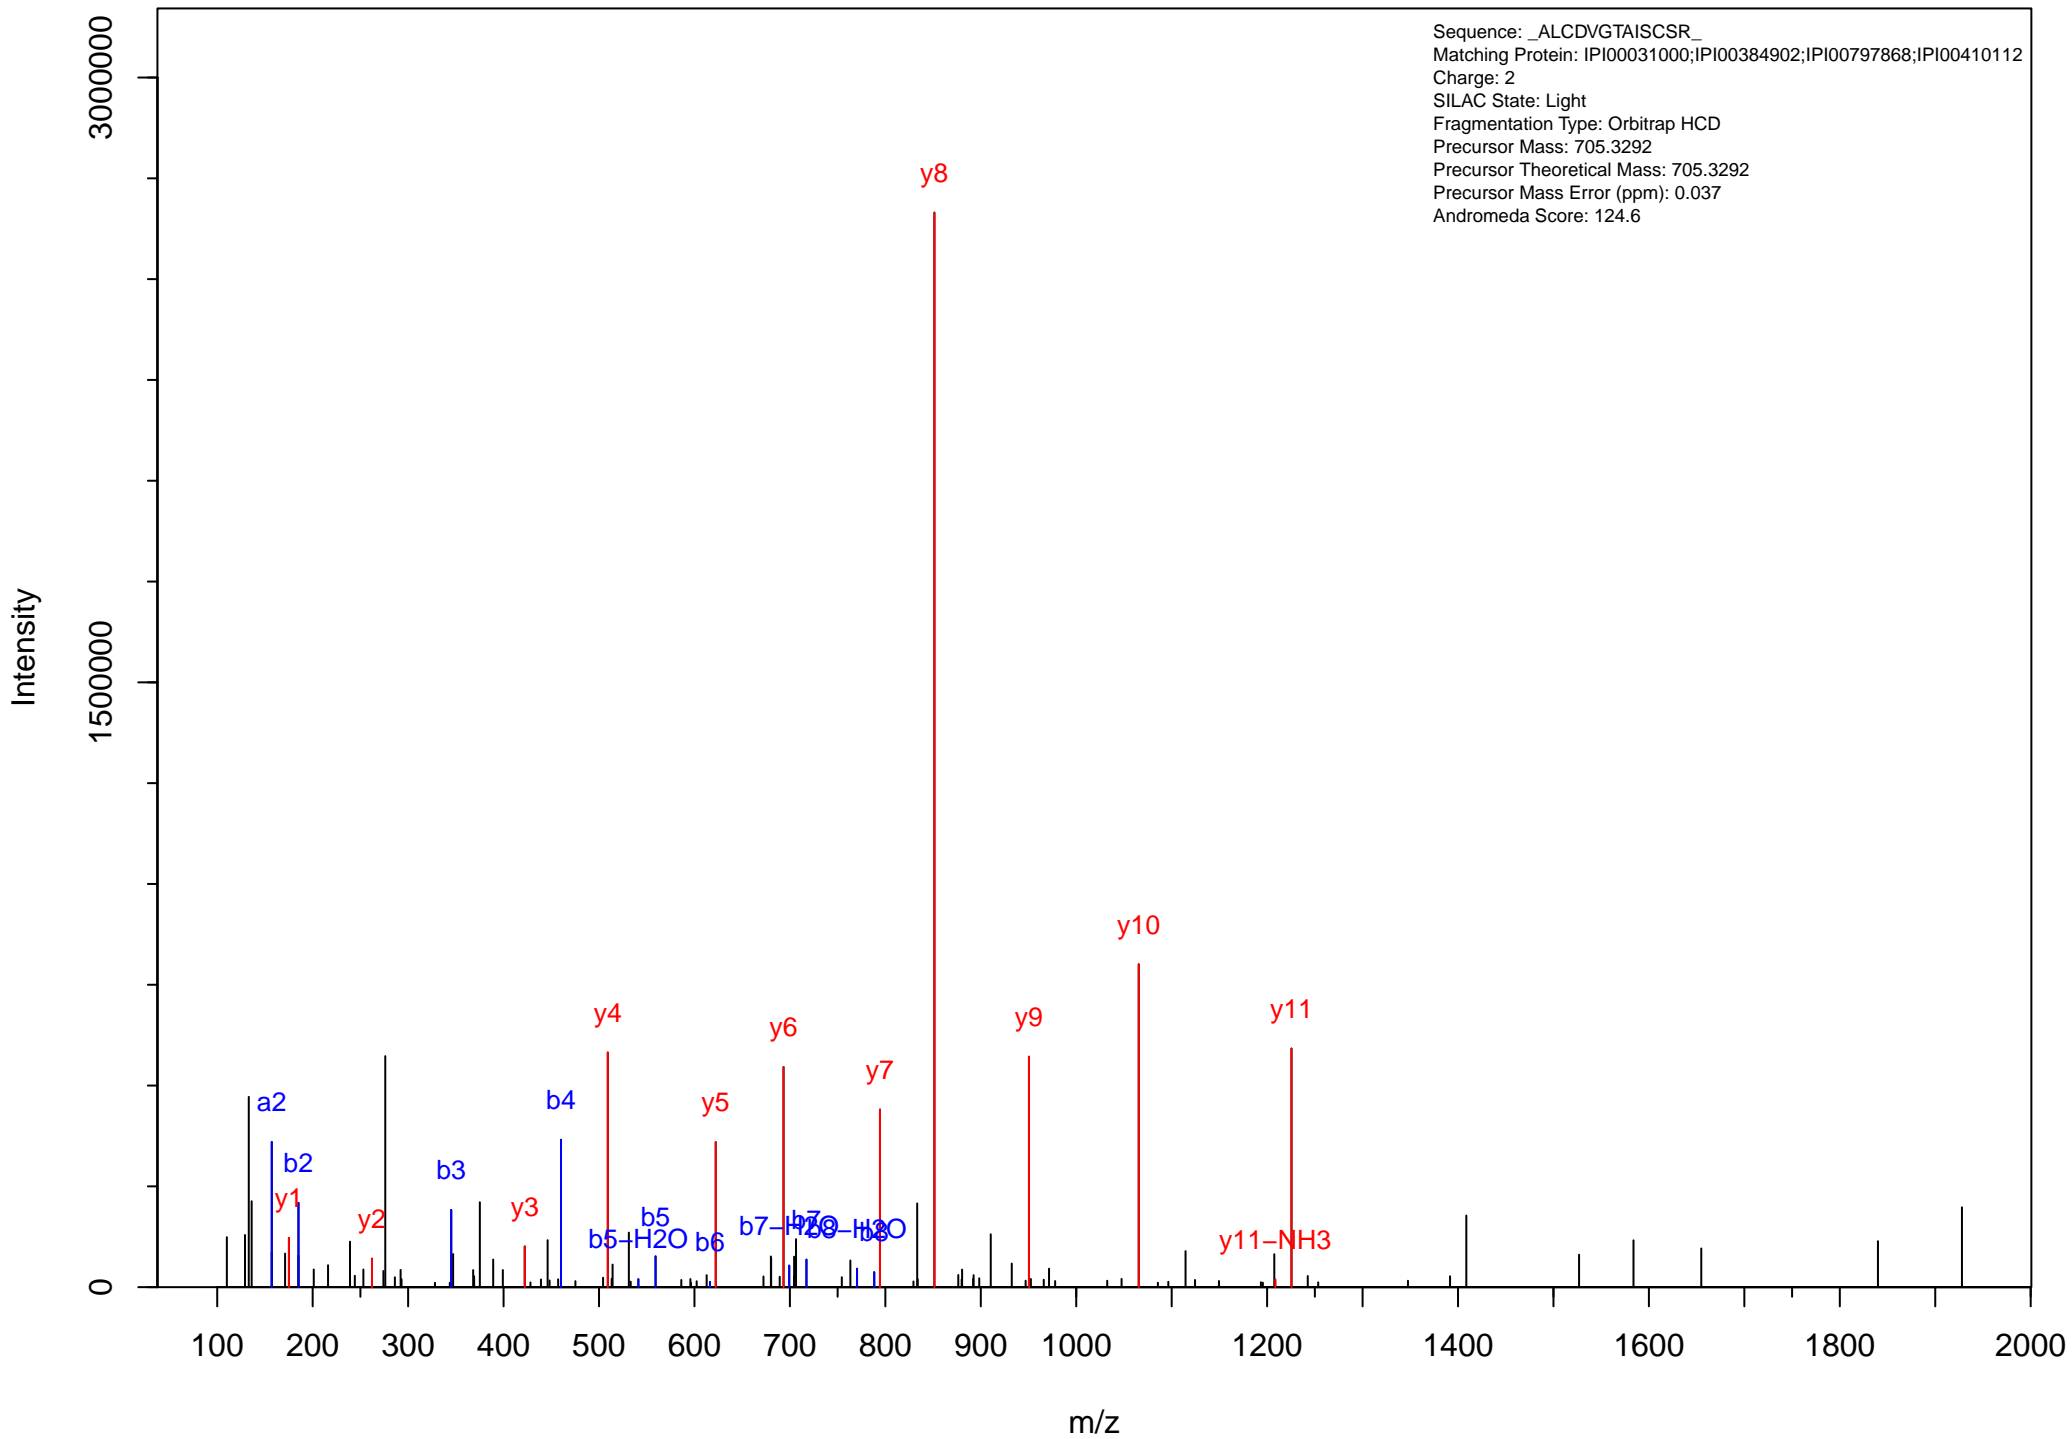

Intensity

6e+05

3e+05

0e+00

100 200 300 400 500 600 700 800 900 1000 1100 1200 1300 1400 1500 1600 1700 1800 1900

m/z

Sequence: \_GPLEWQDYIYK\_  
Matching Protein: IPI00103087;IPI00917281;IPI00916543  
Charge: 2  
SILAC State: Light  
Fragmentation Type: Orbitrap HCD  
Precursor Mass: 706.3479  
Precursor Theoretical Mass: 706.3483  
Precursor Mass Error (ppm): -0.5  
Andromeda Score: 73.8

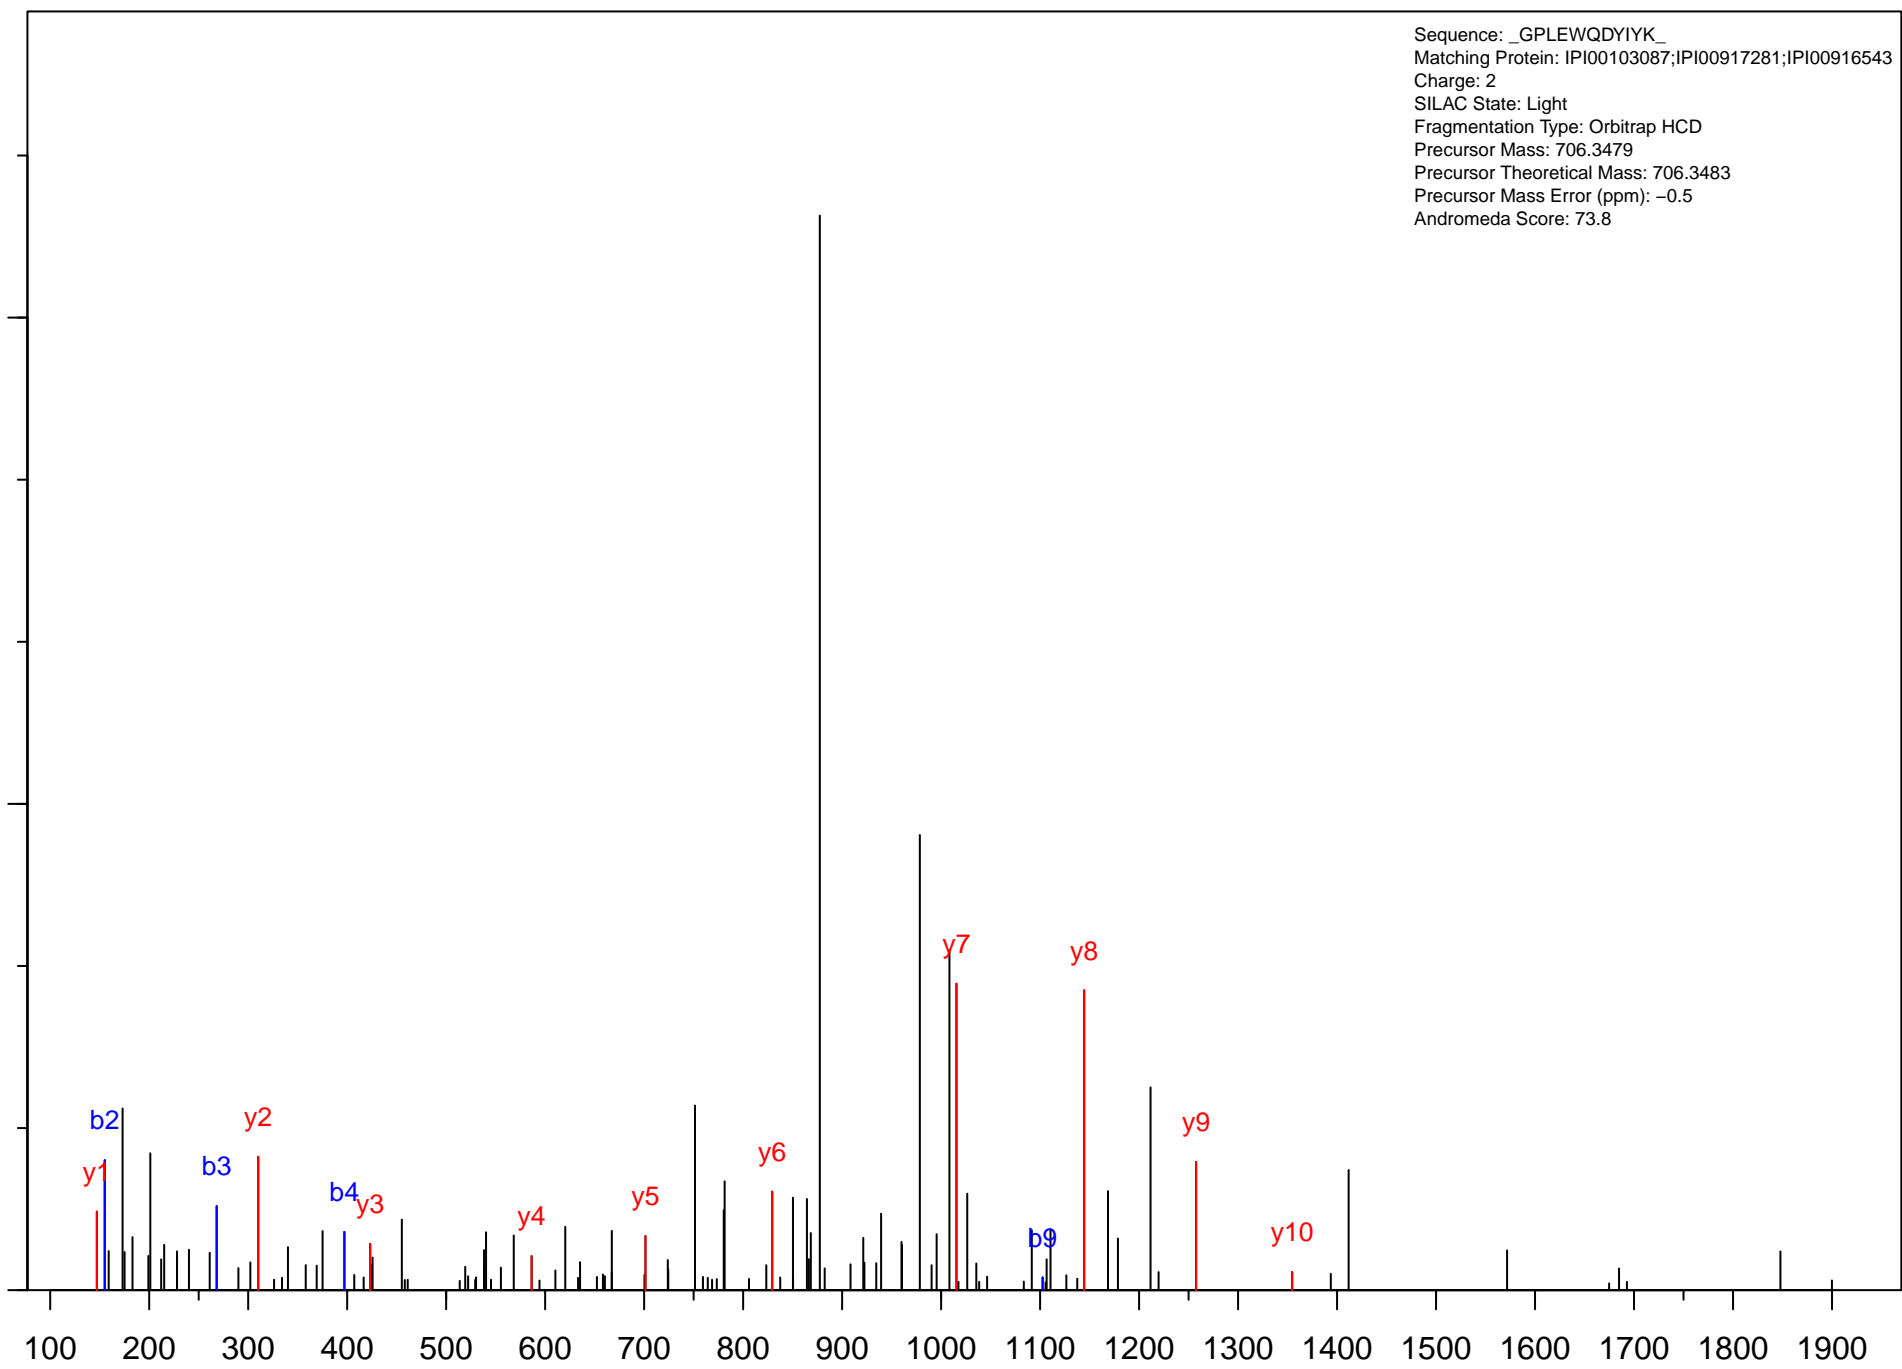

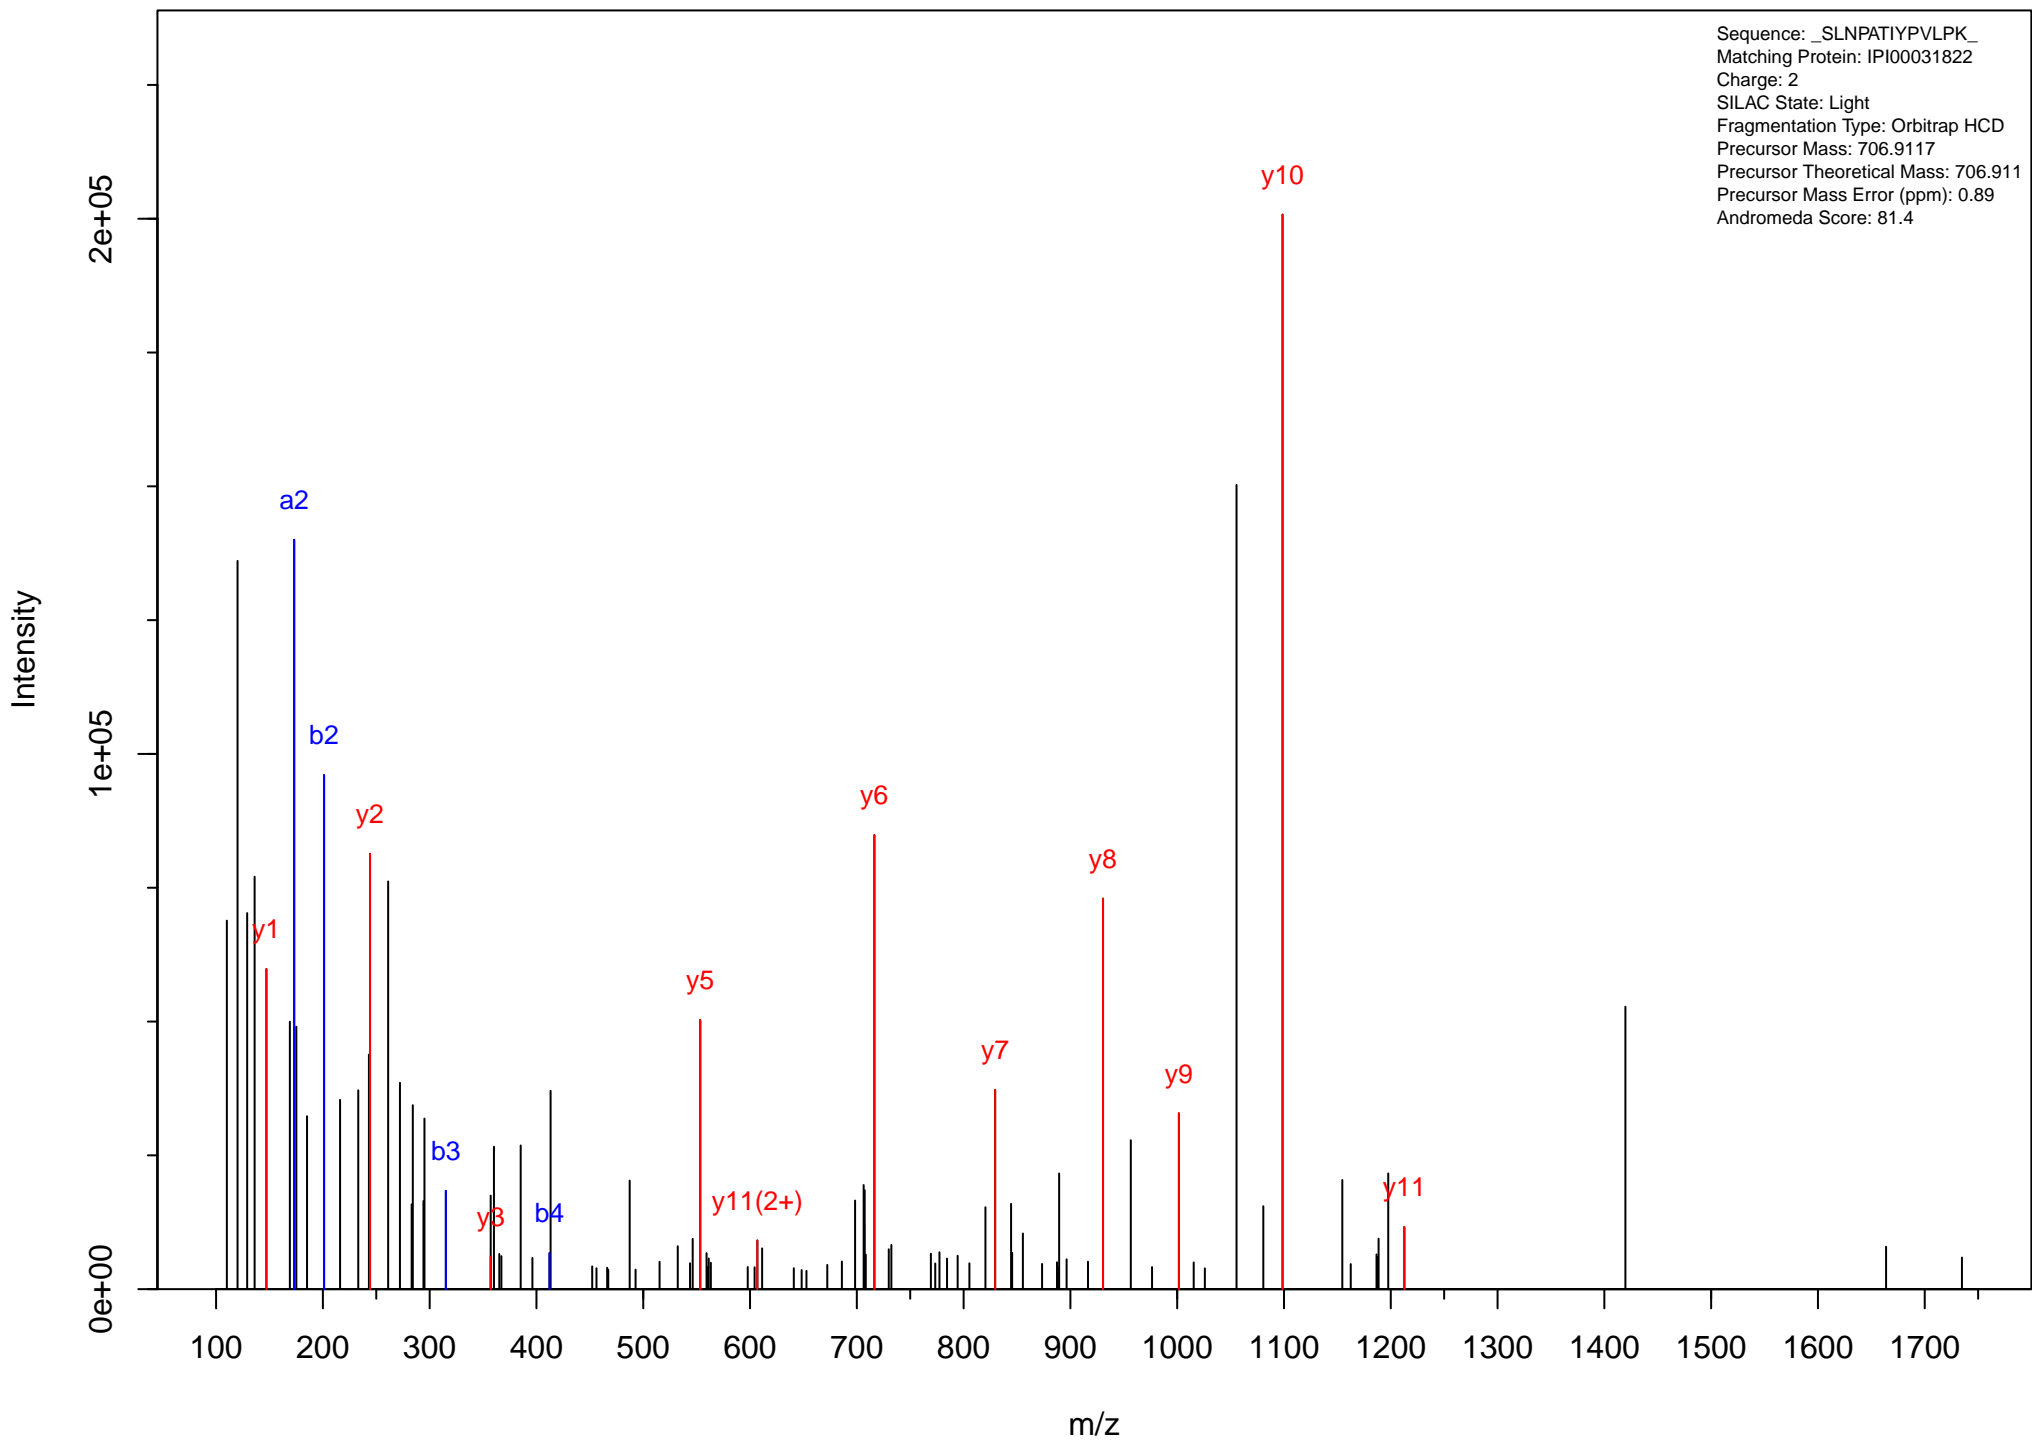

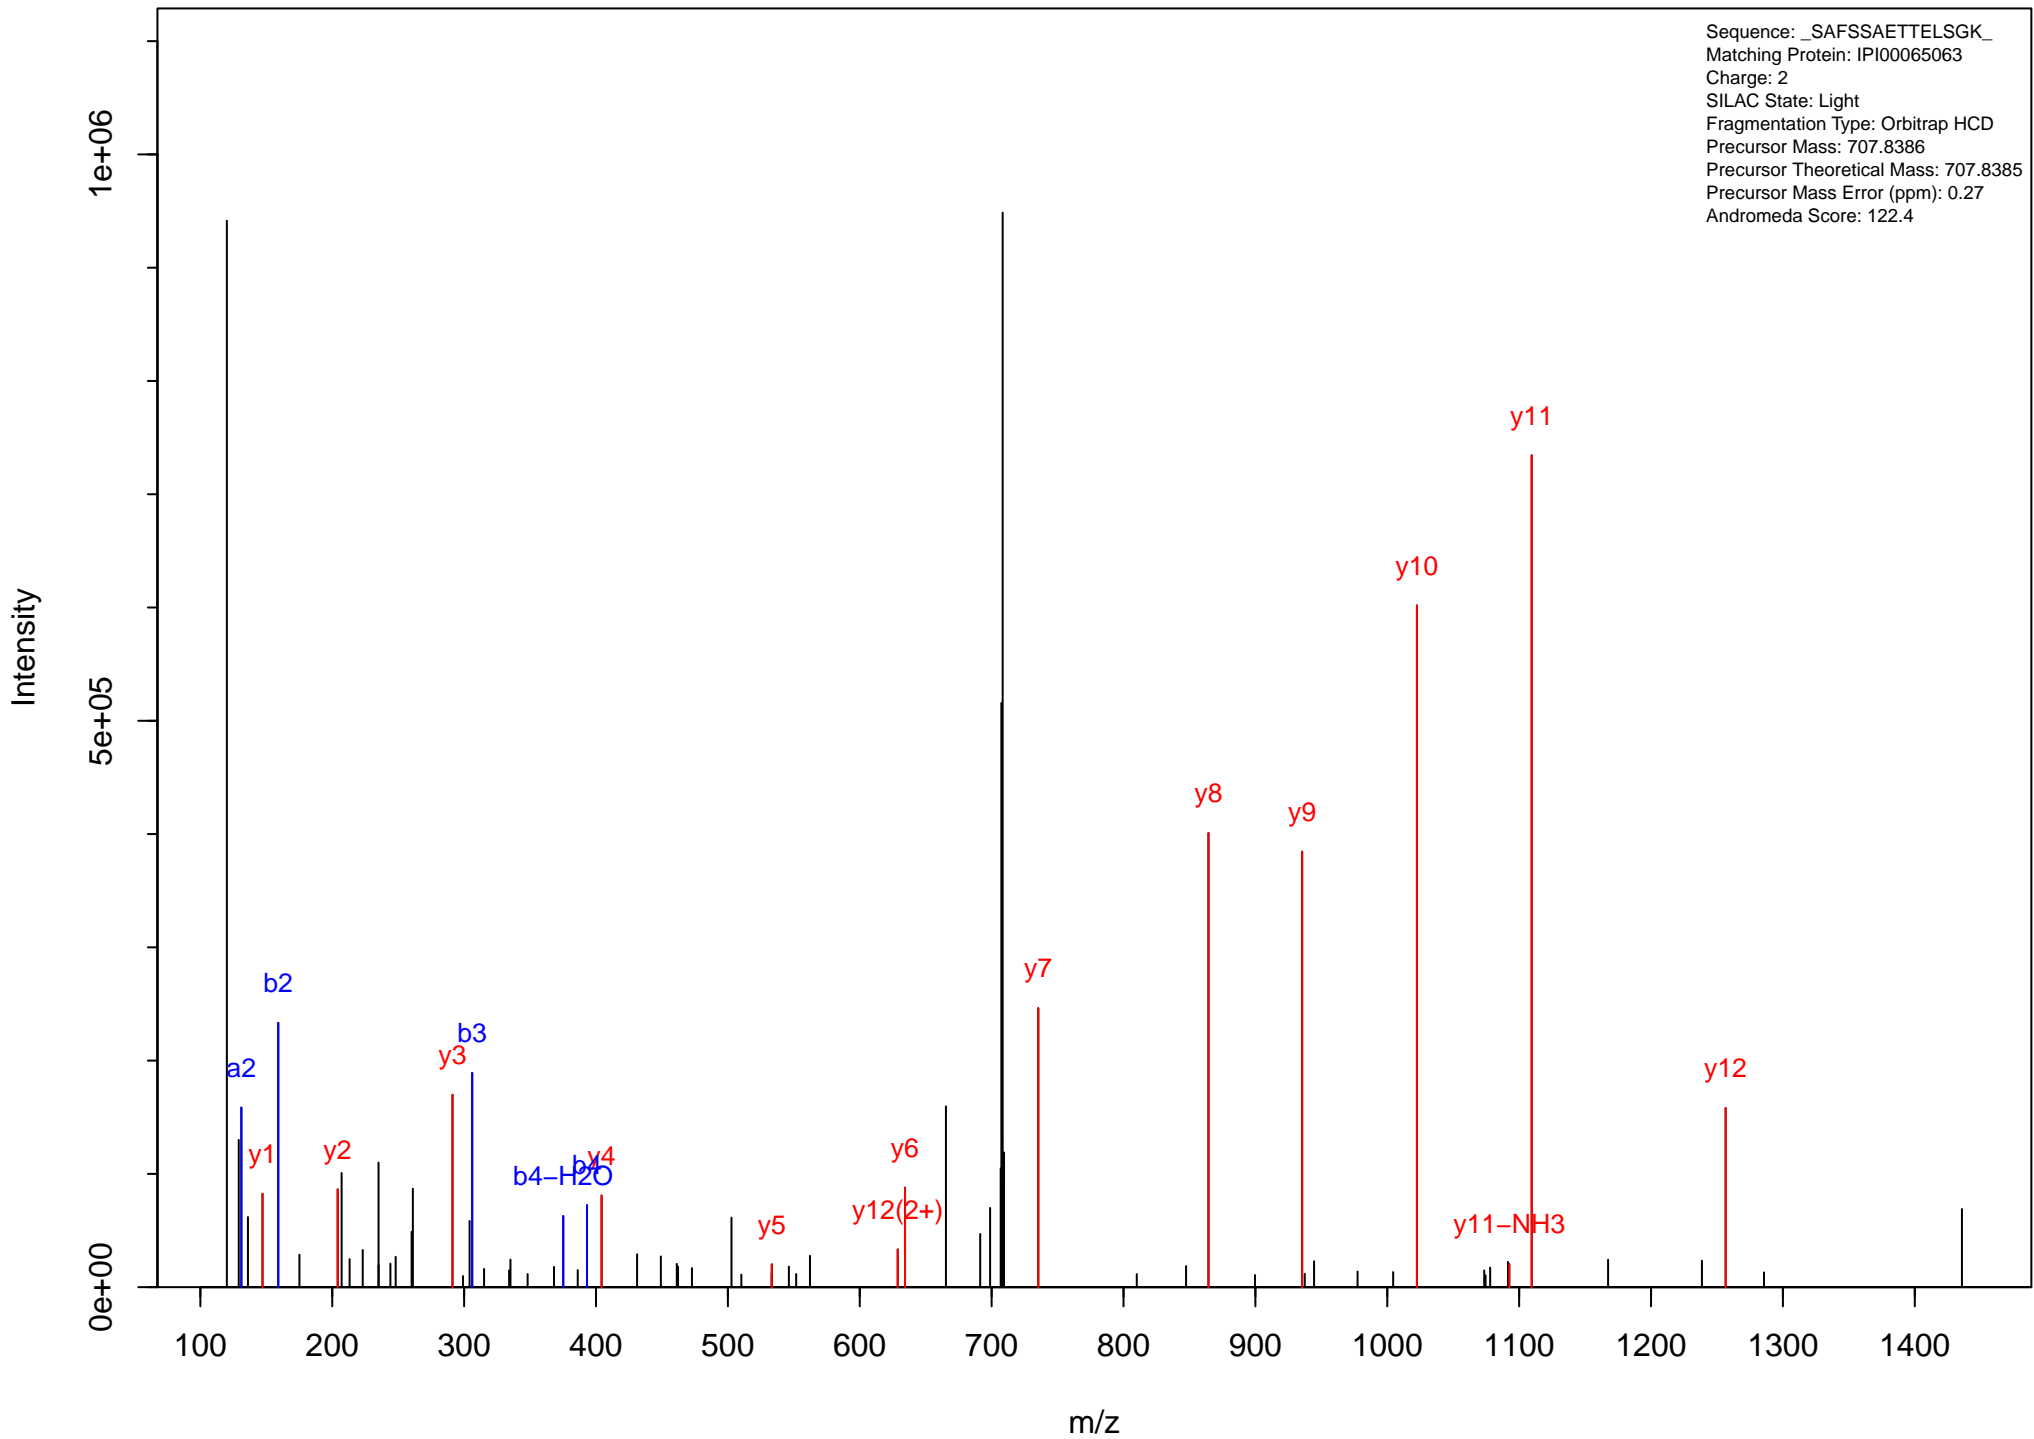

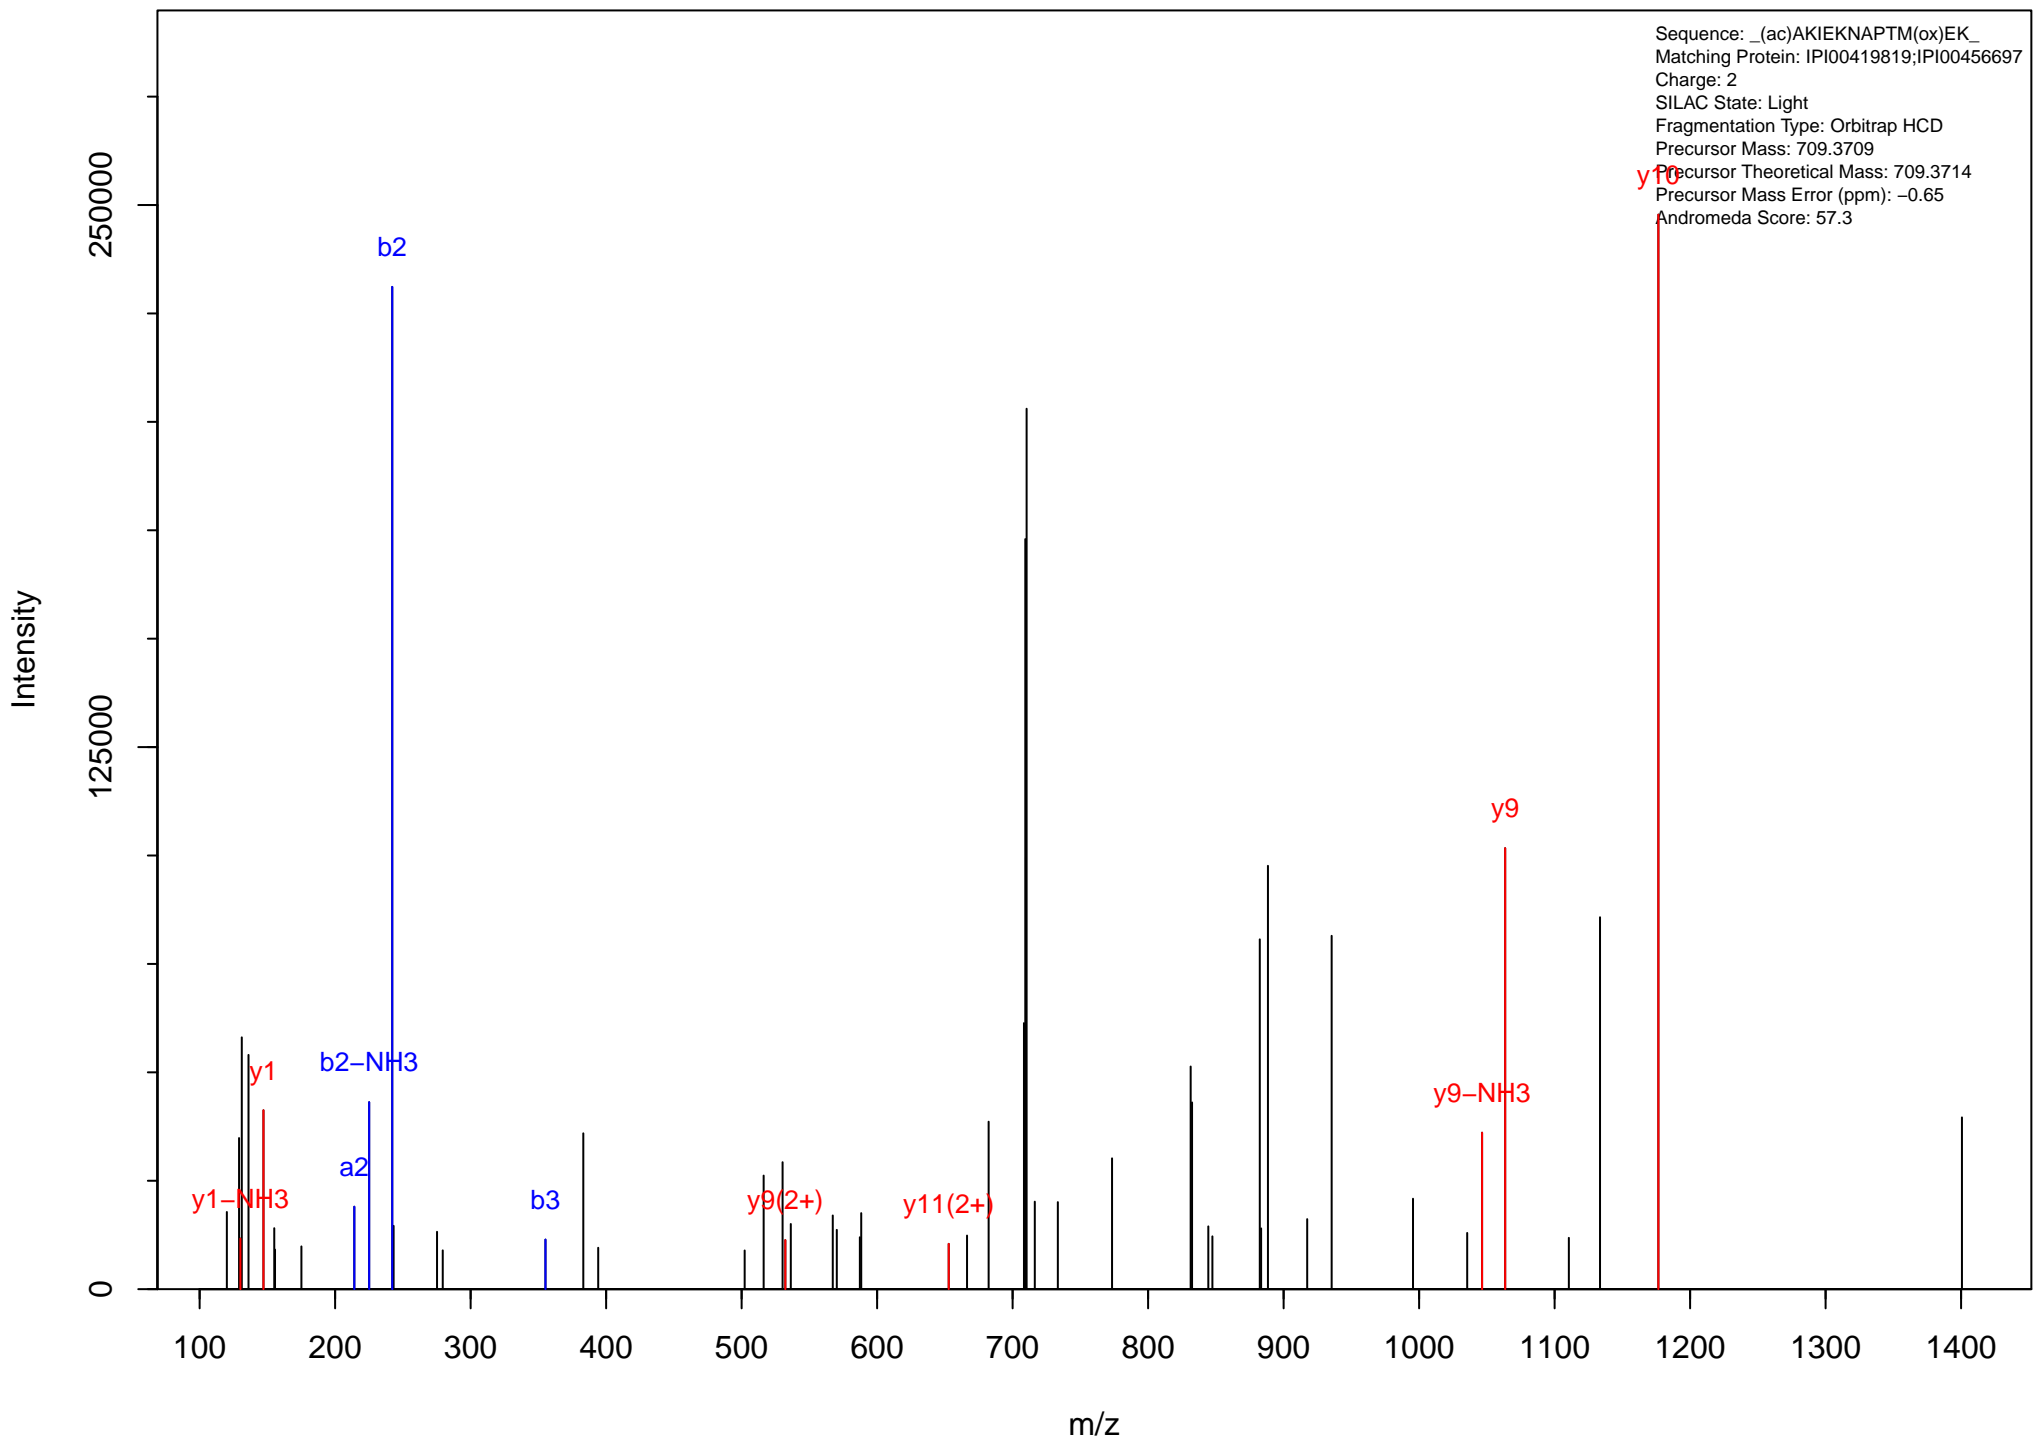

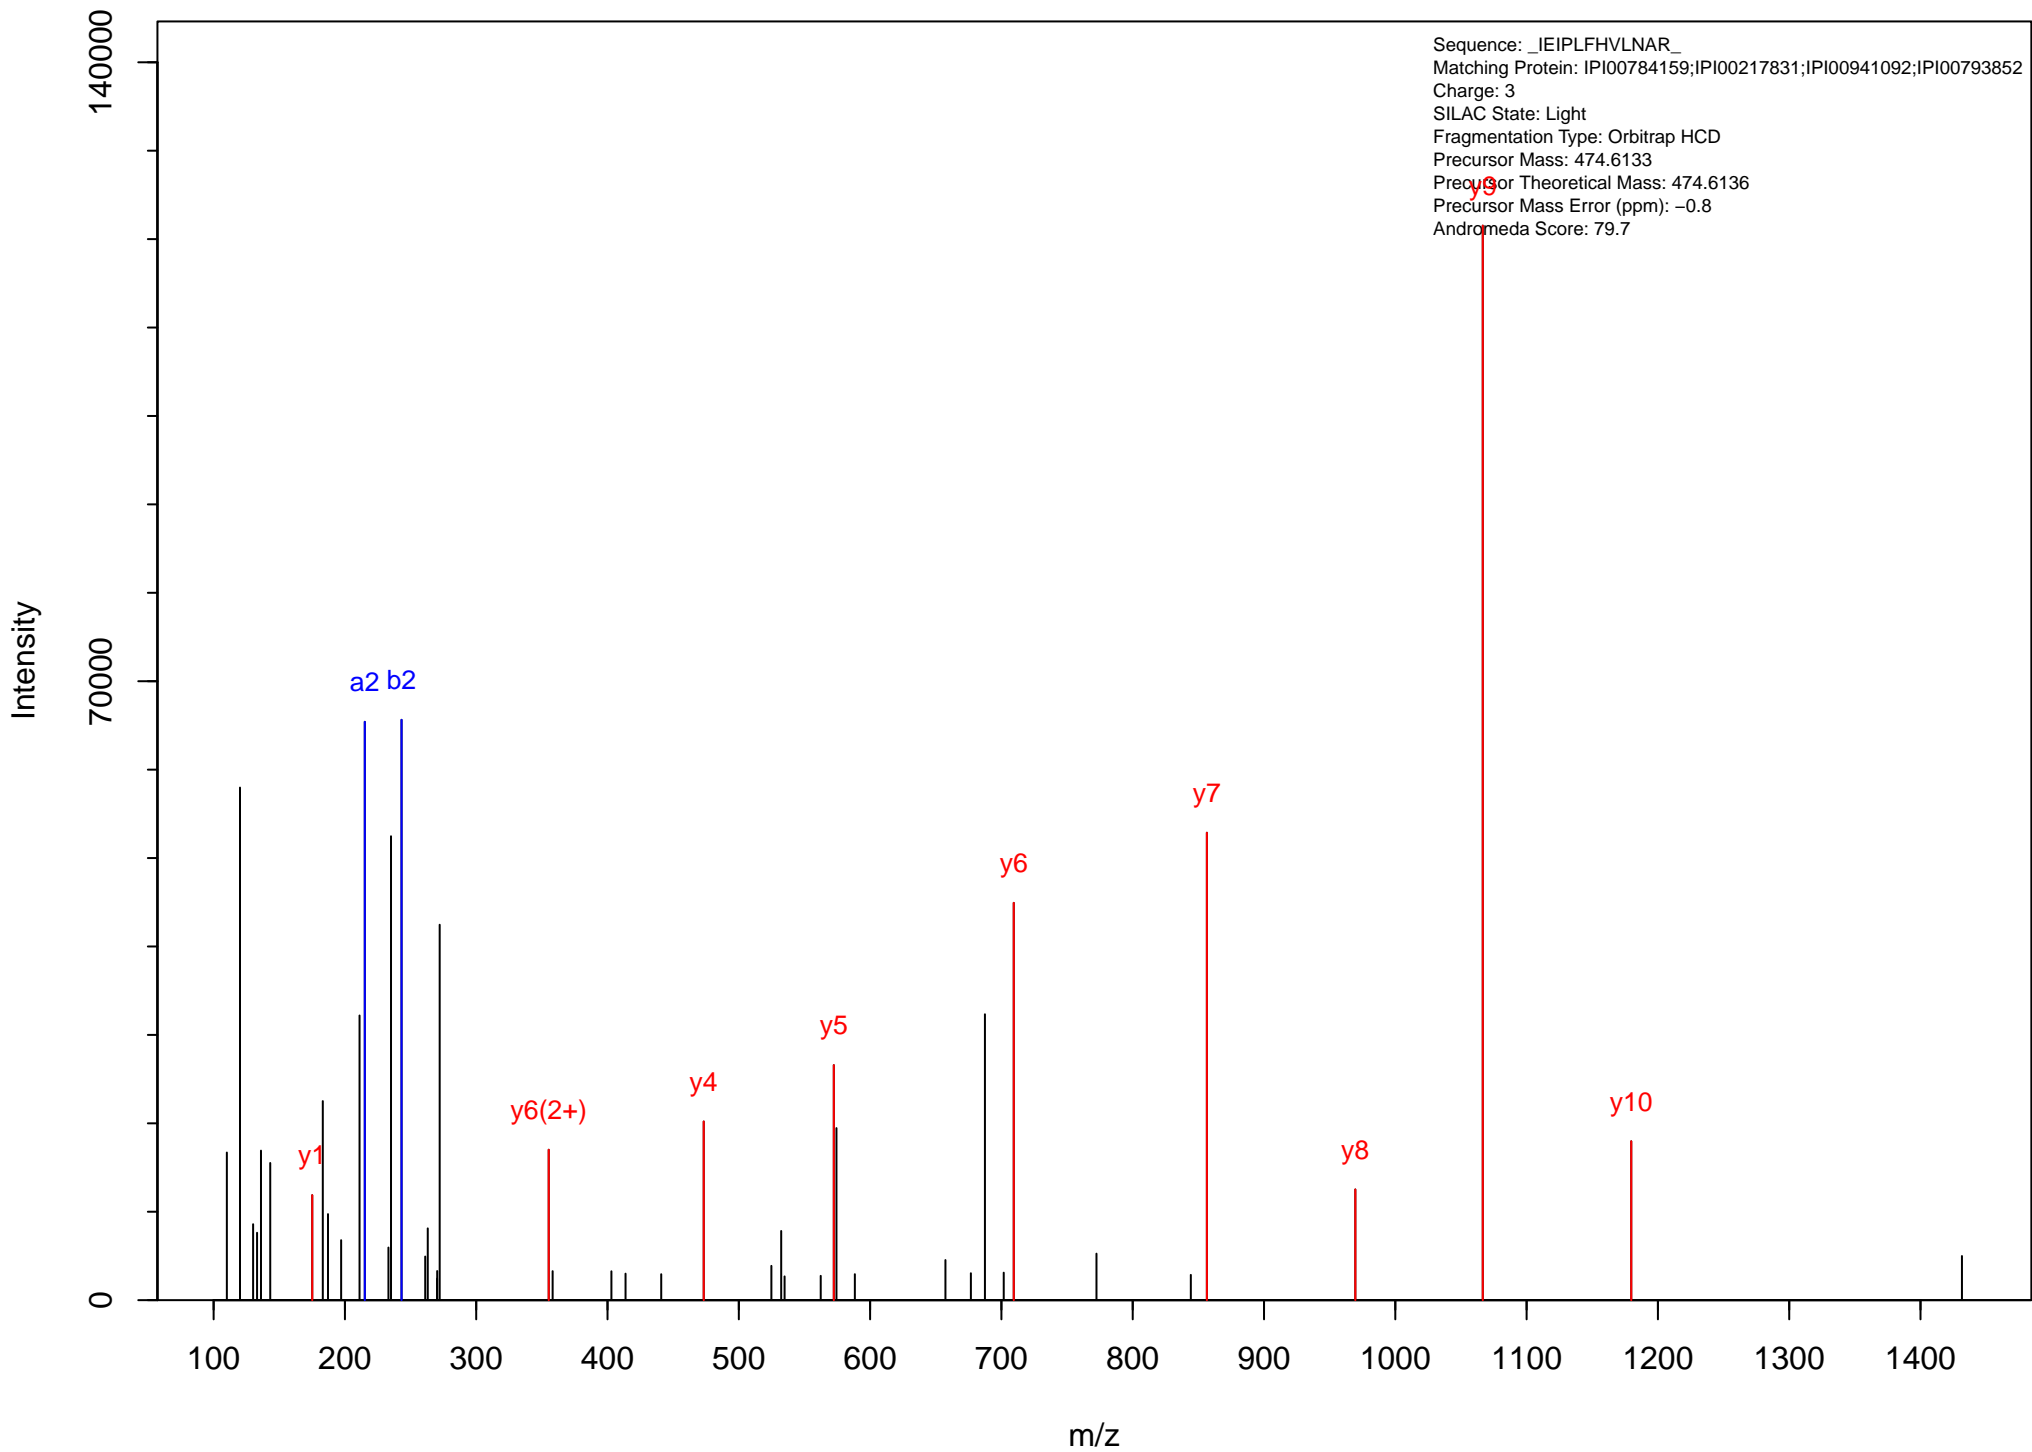

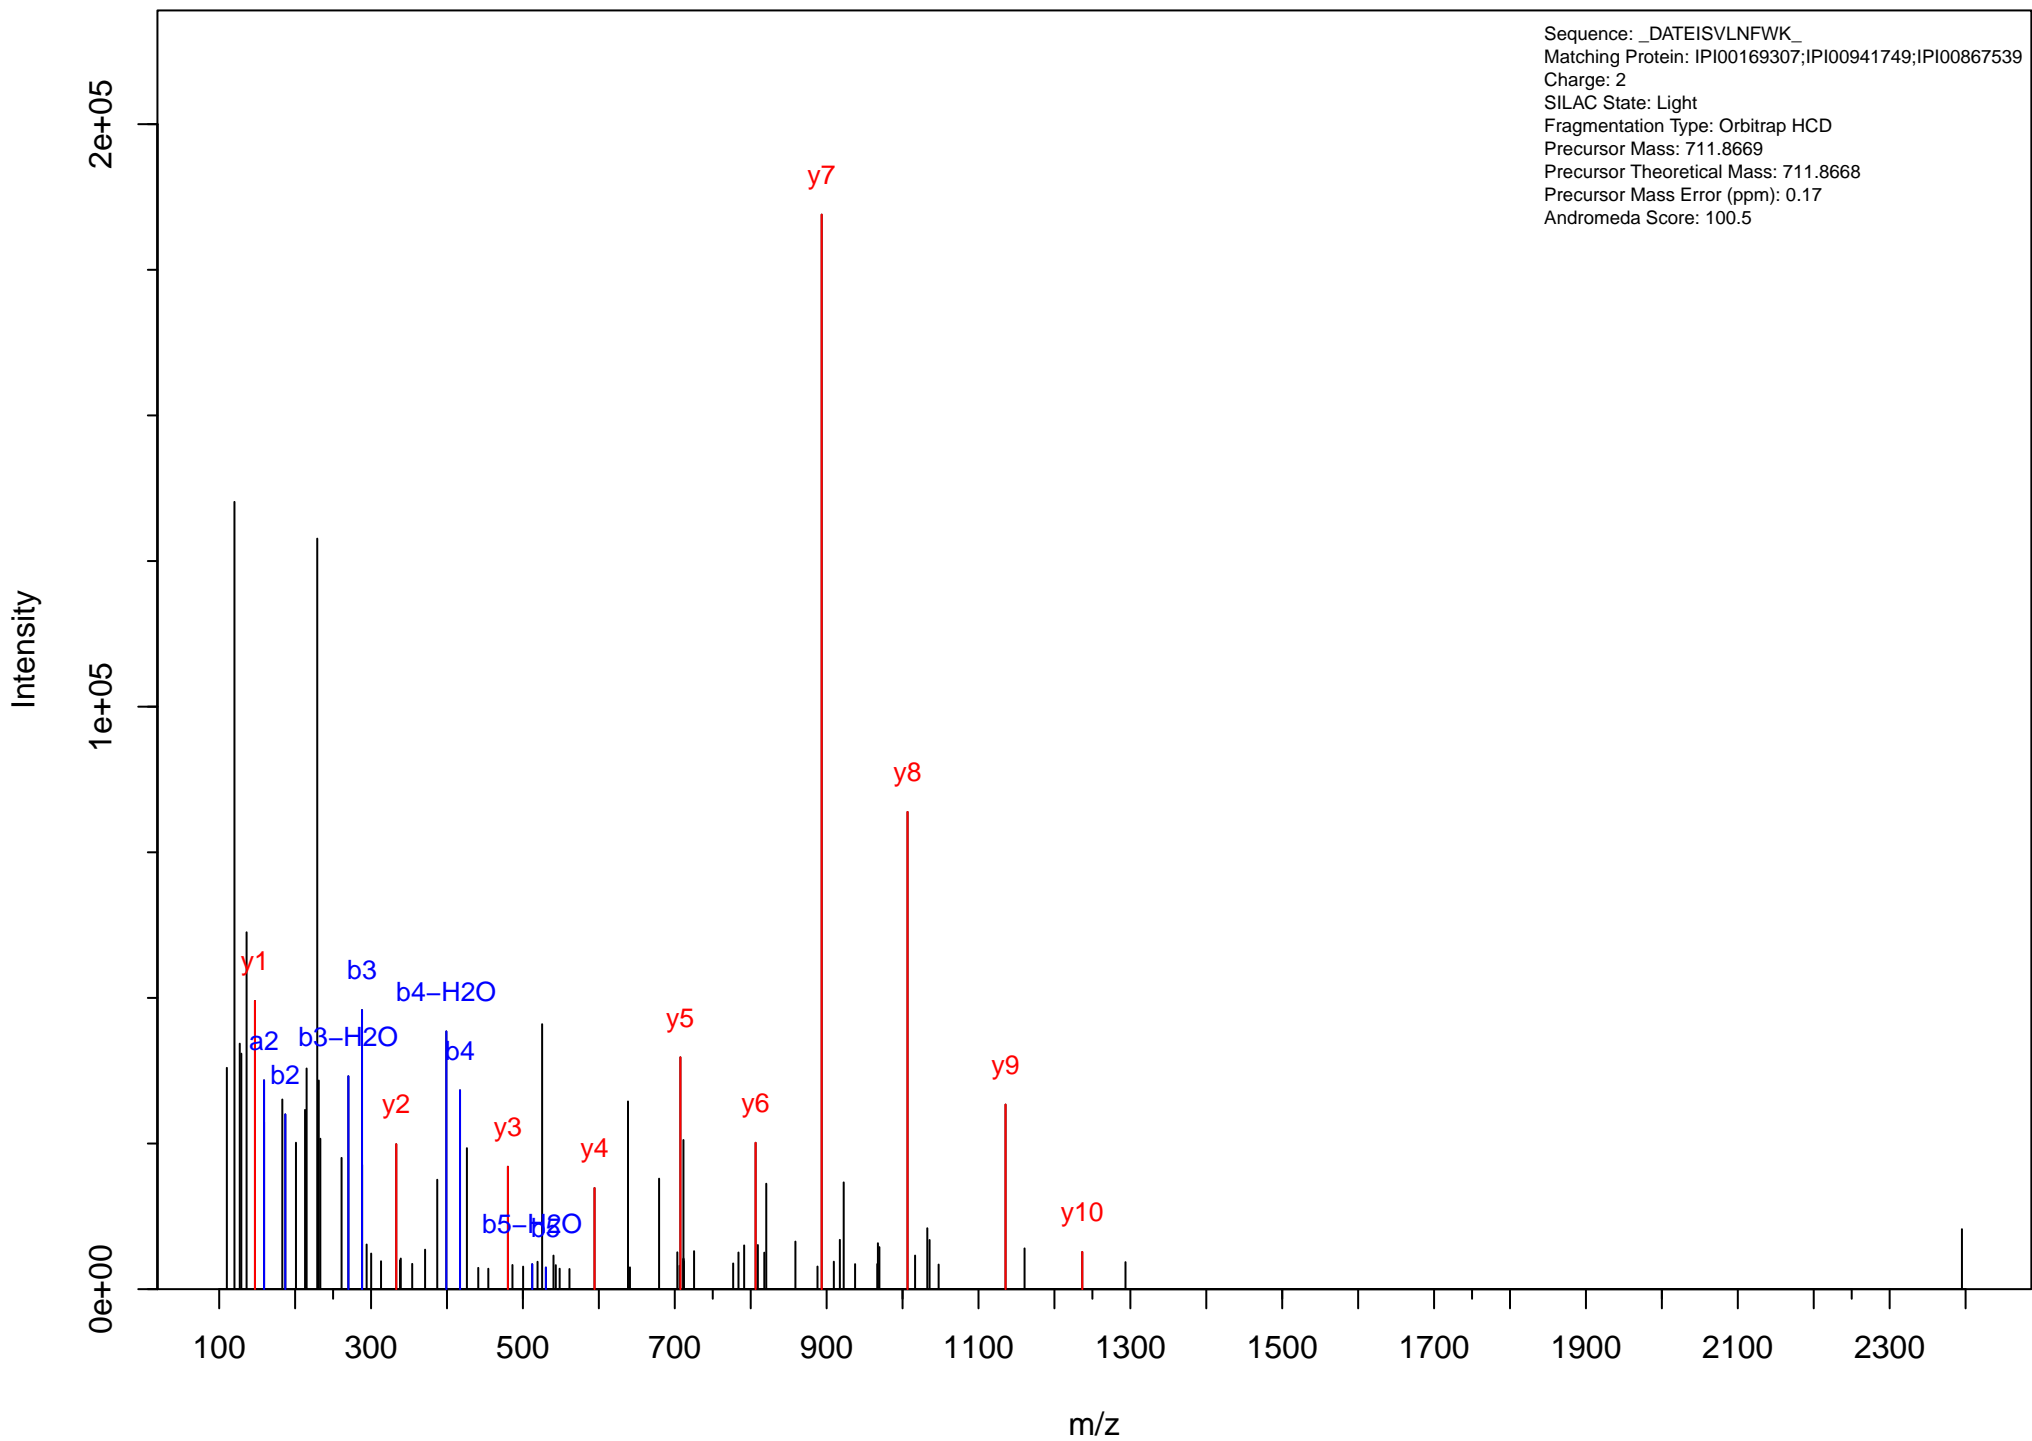

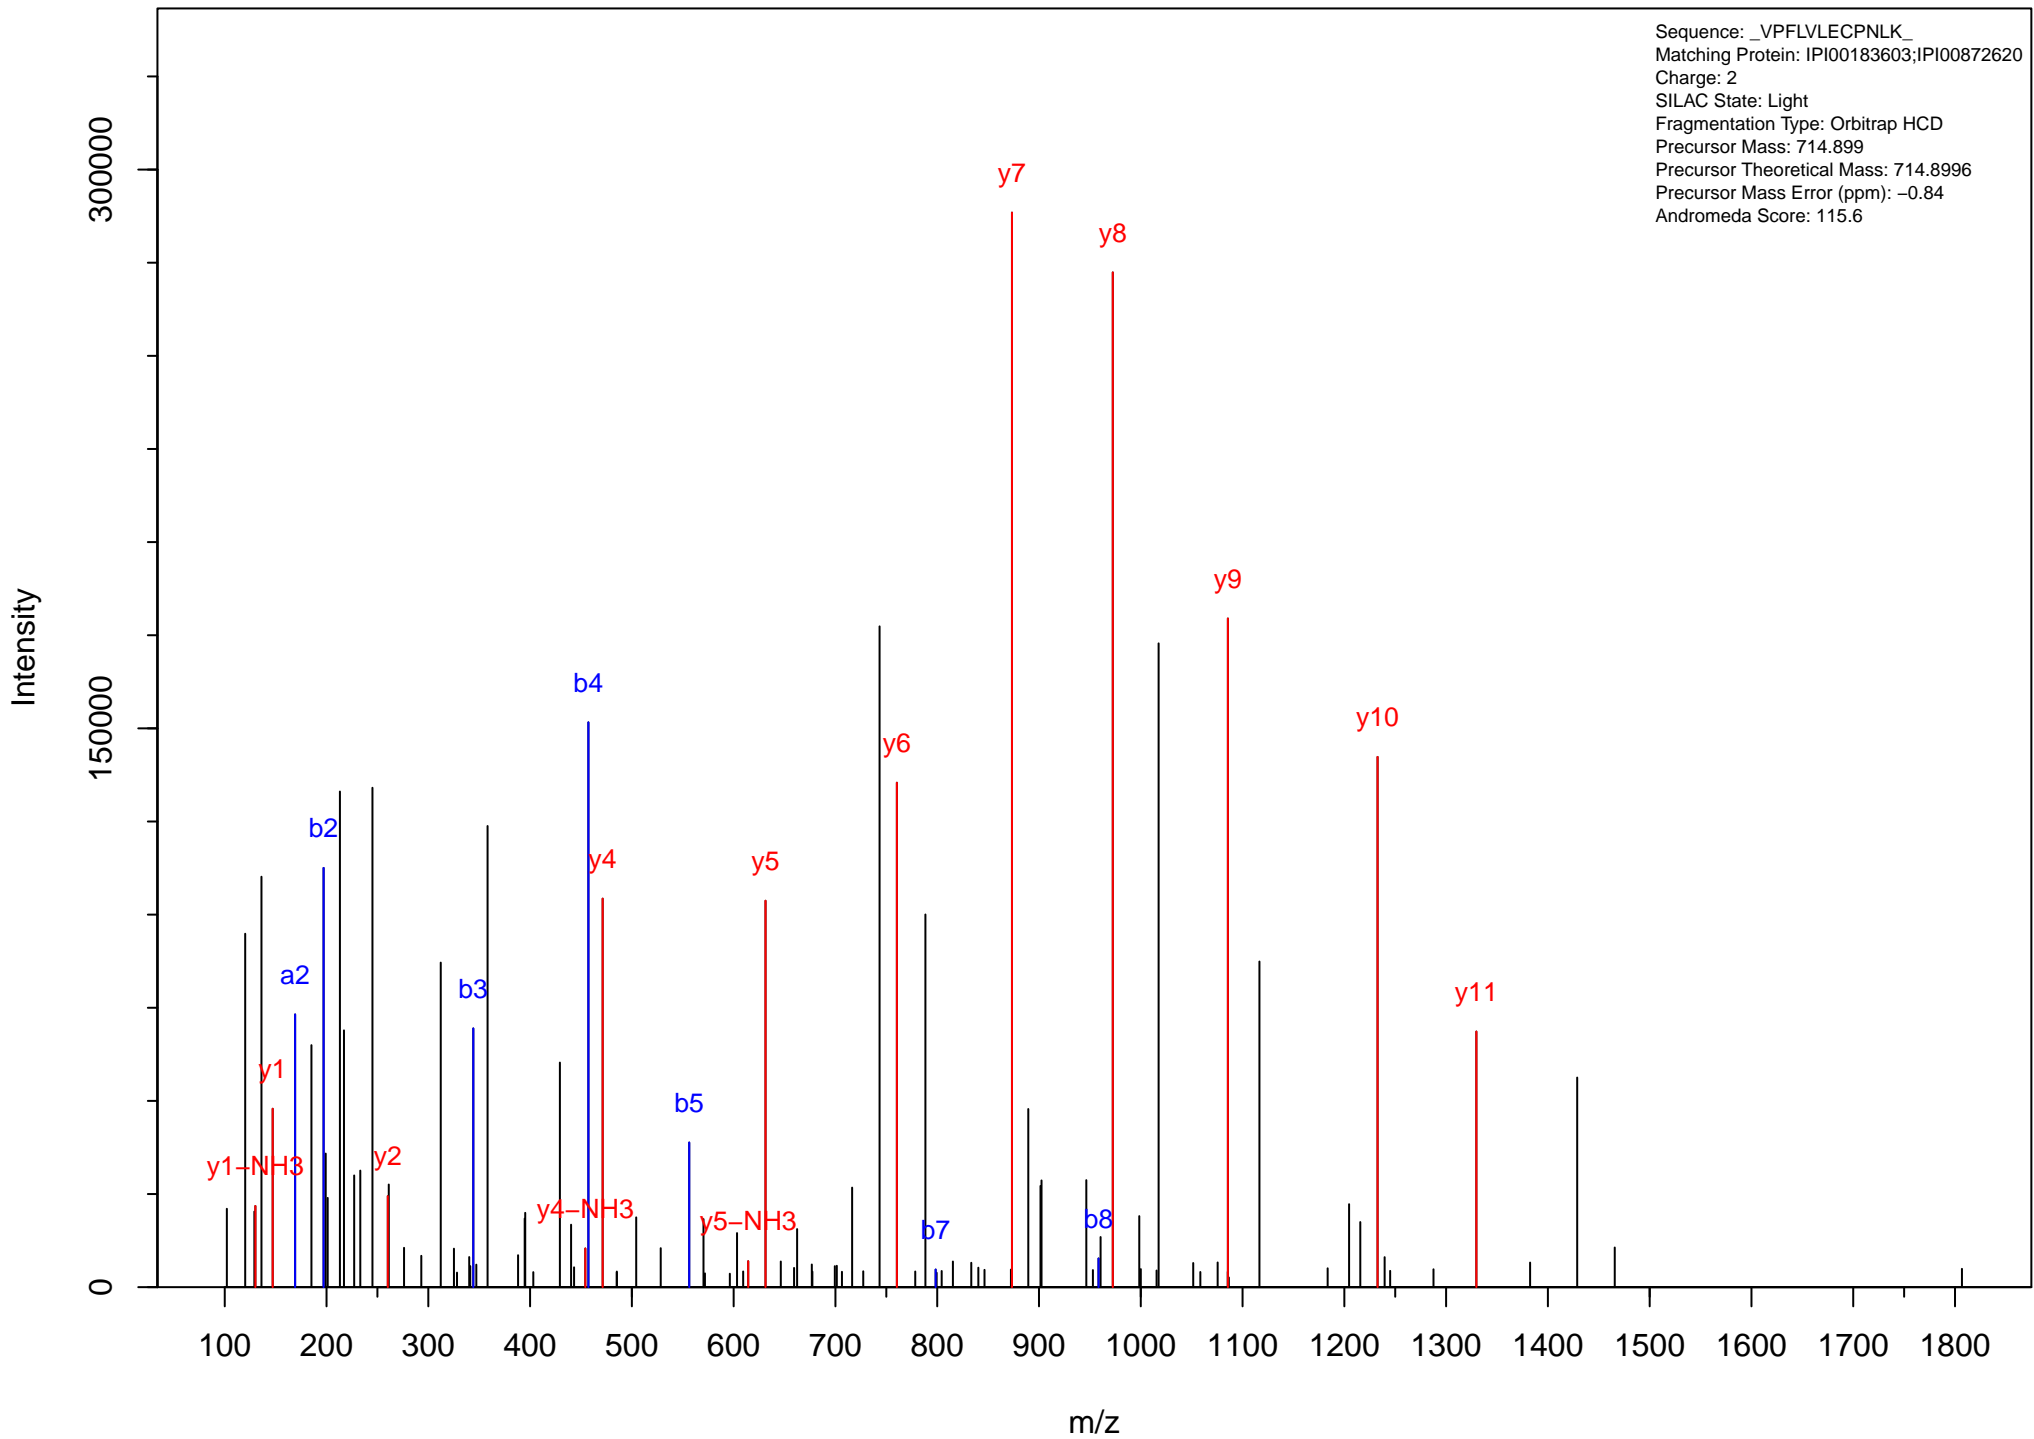

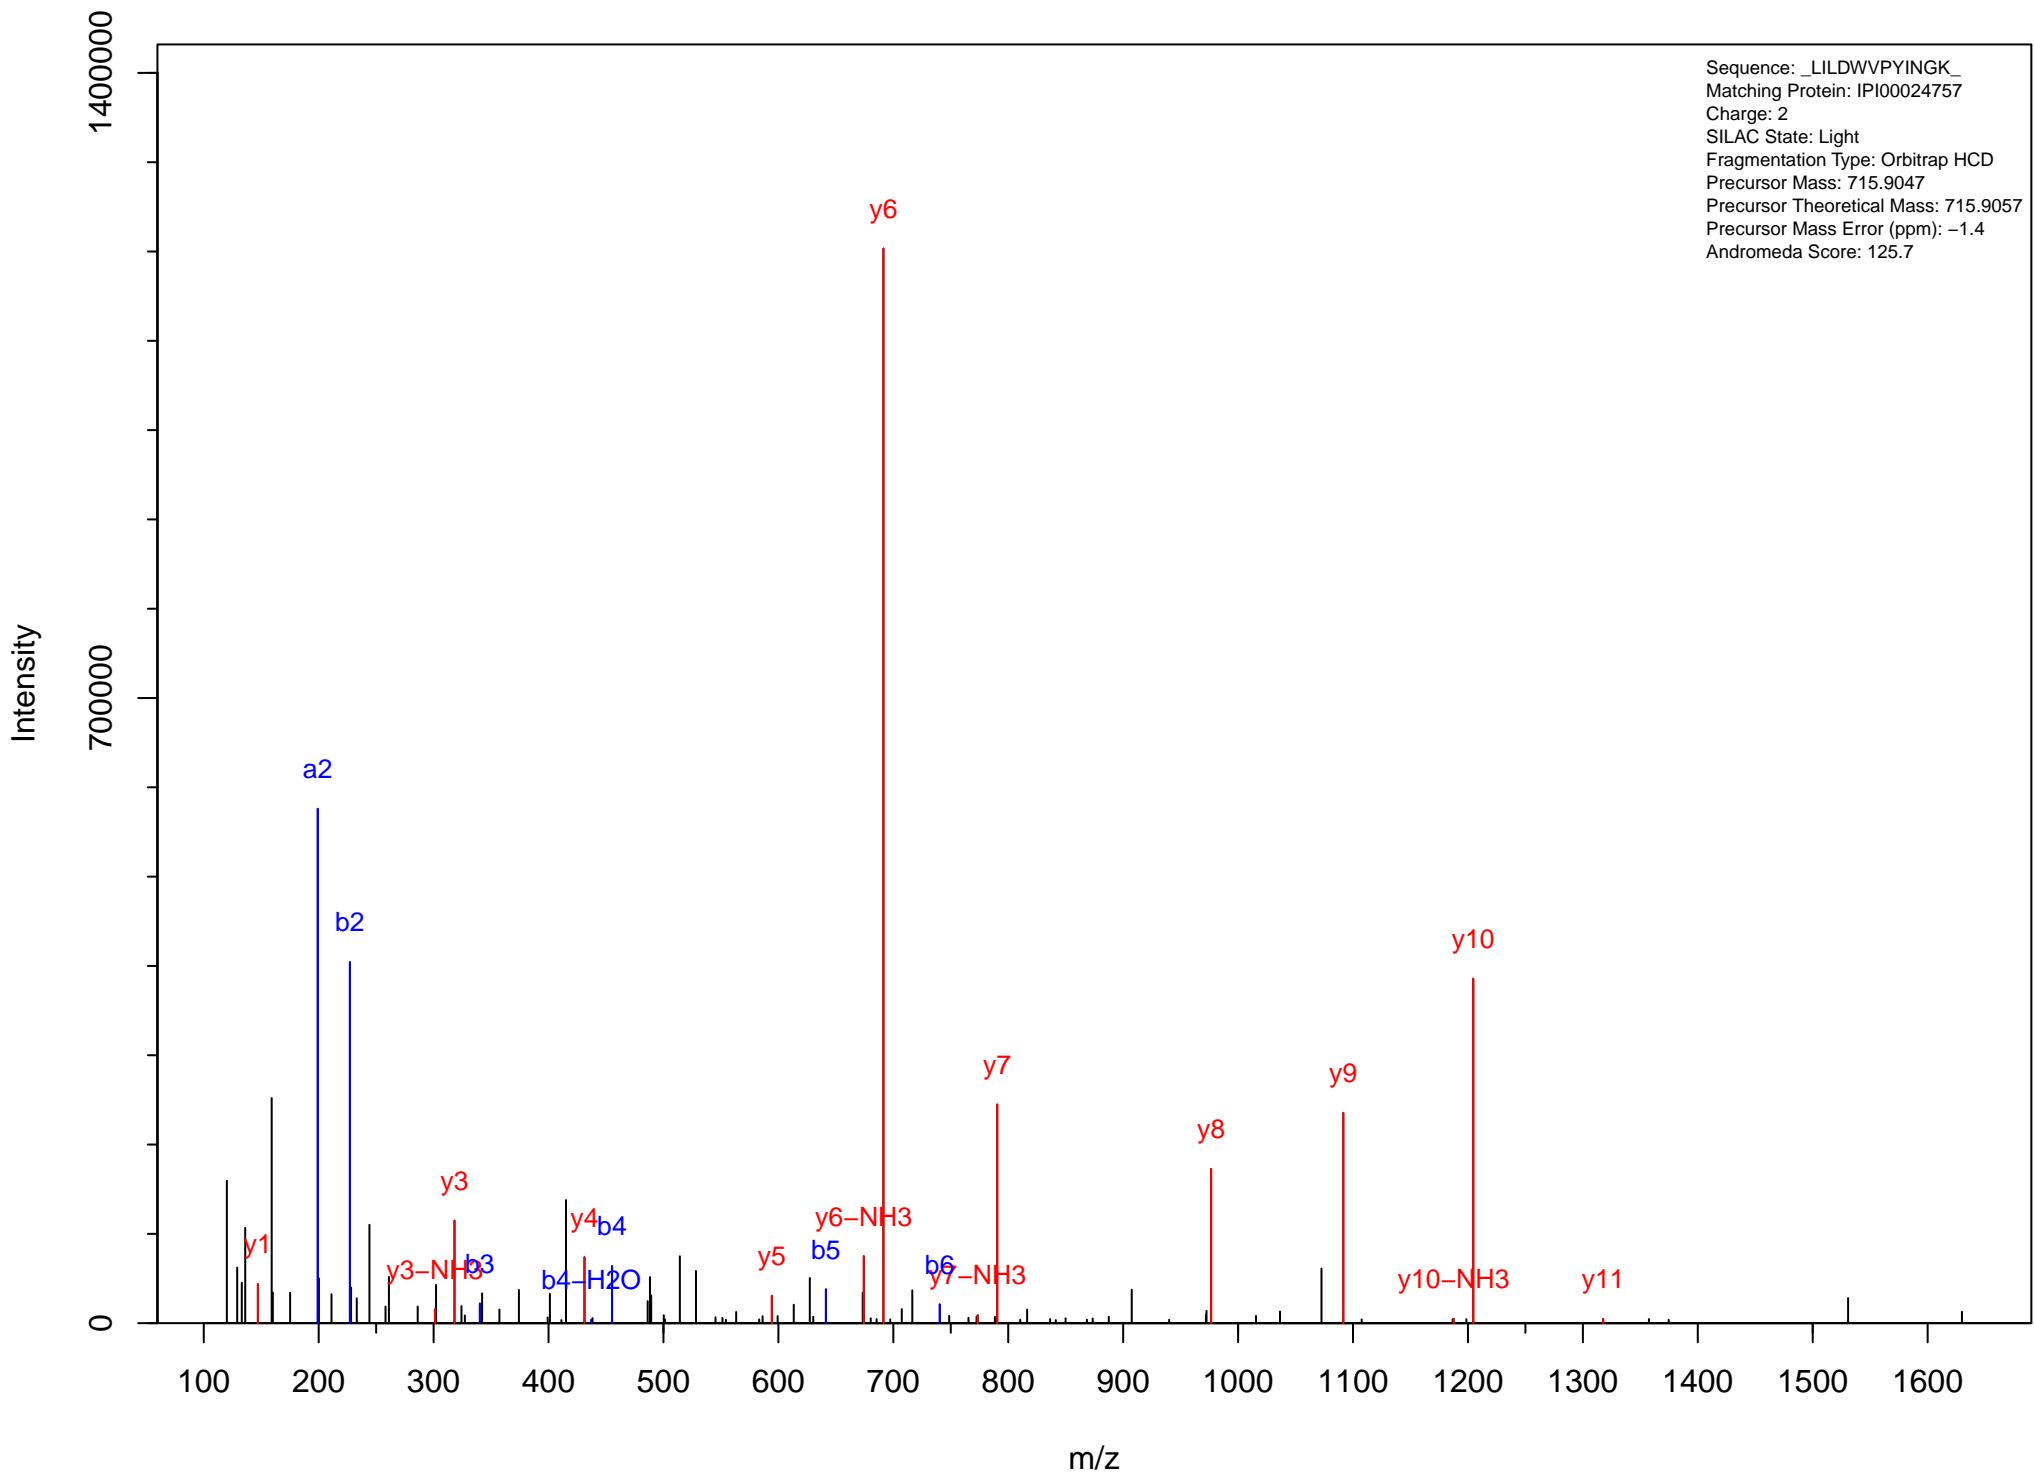

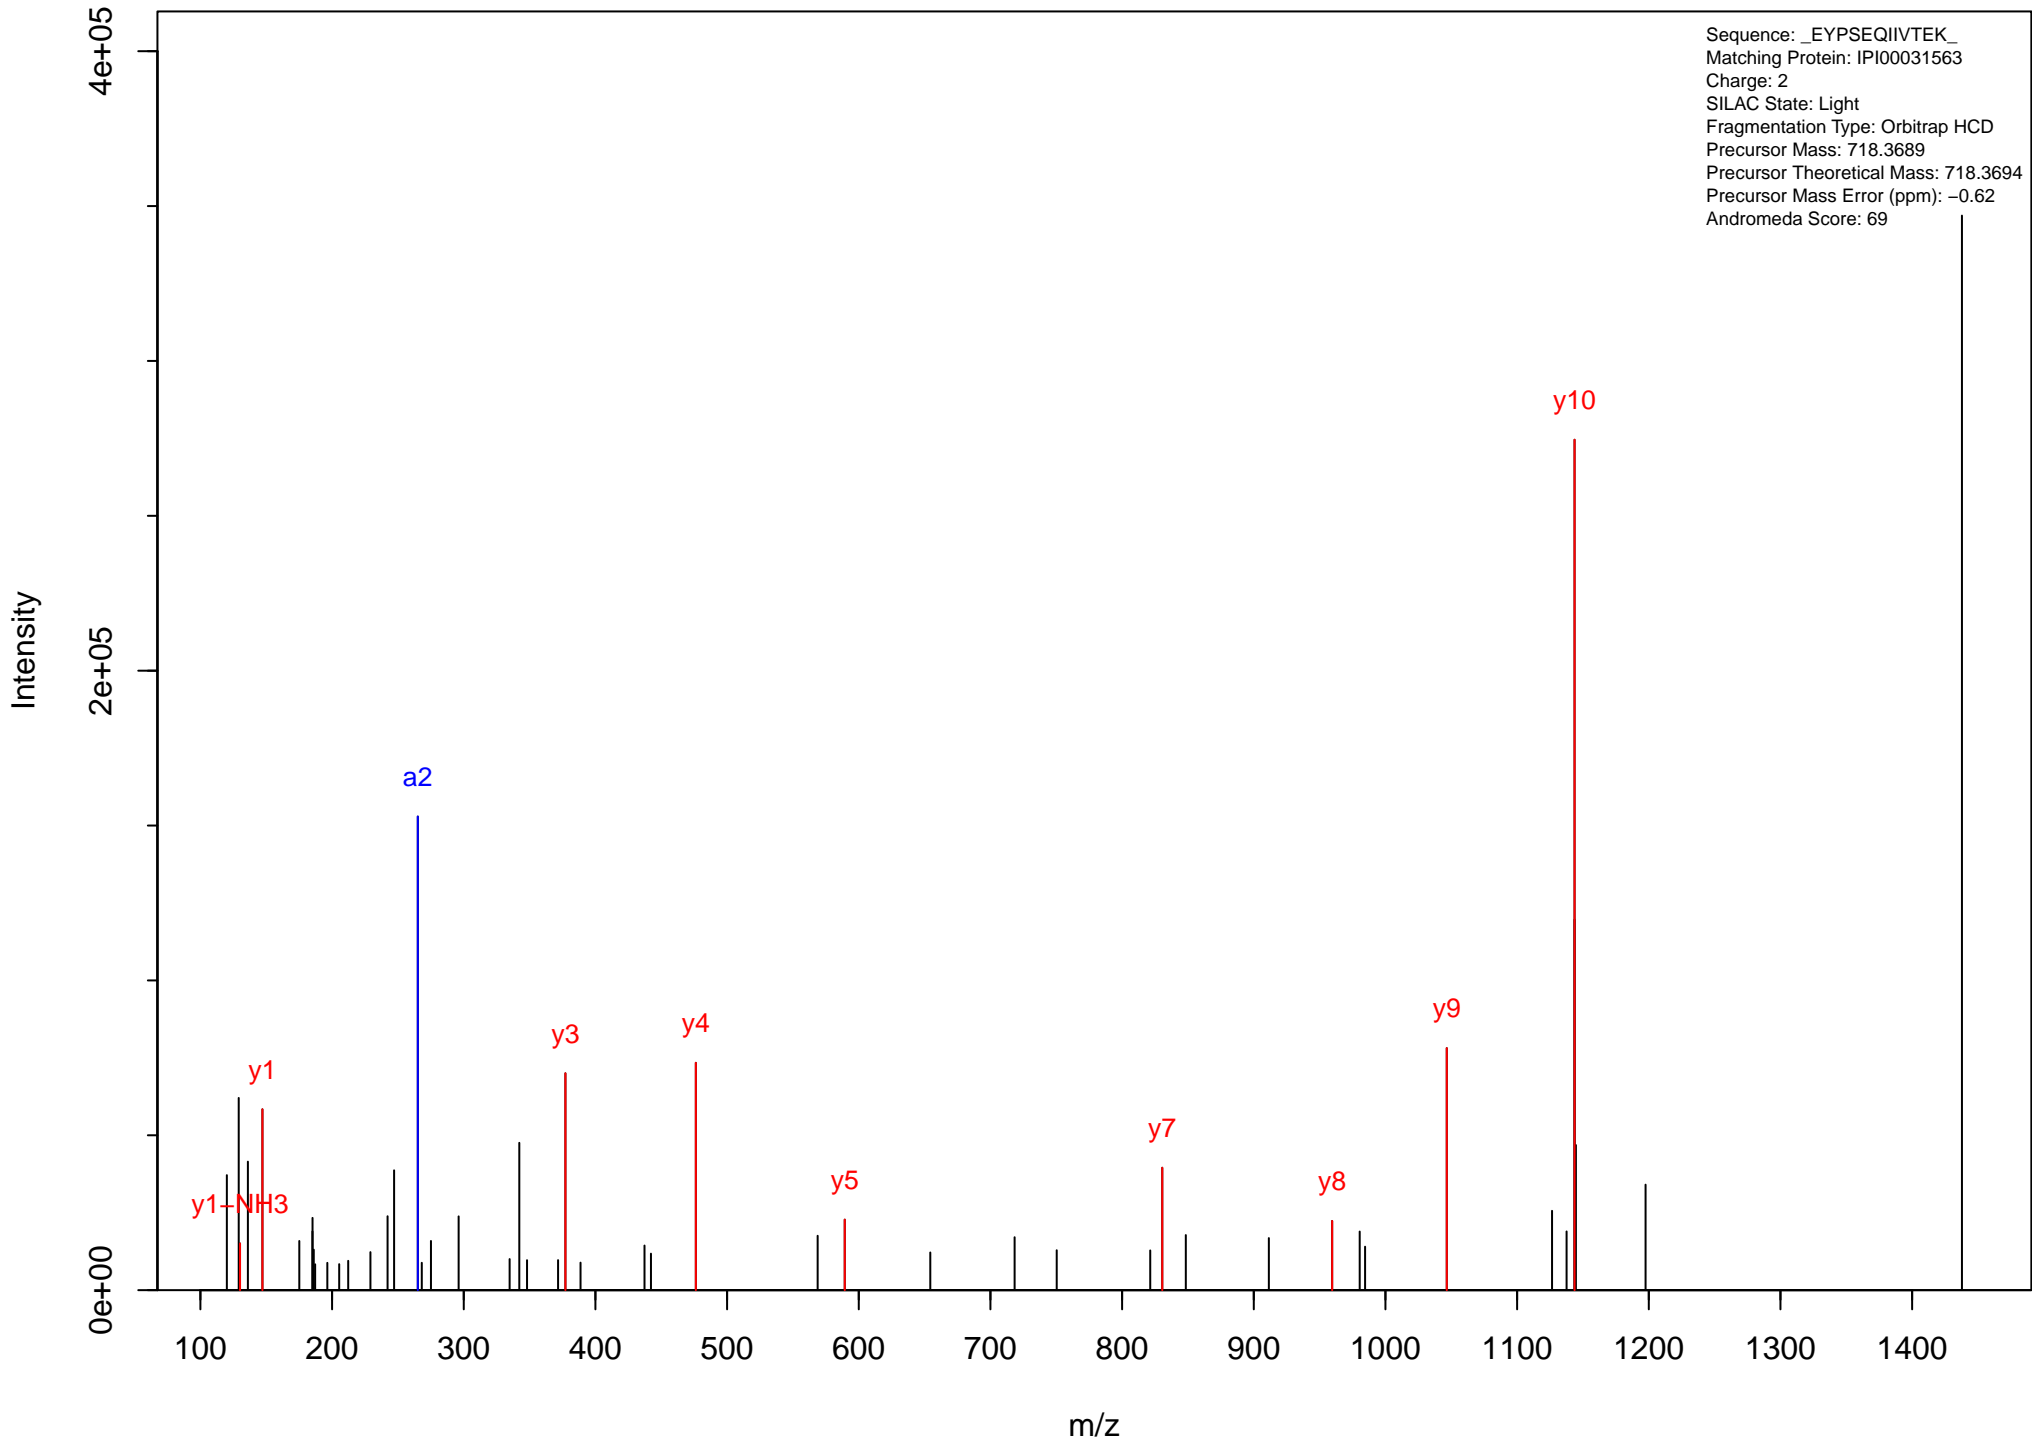

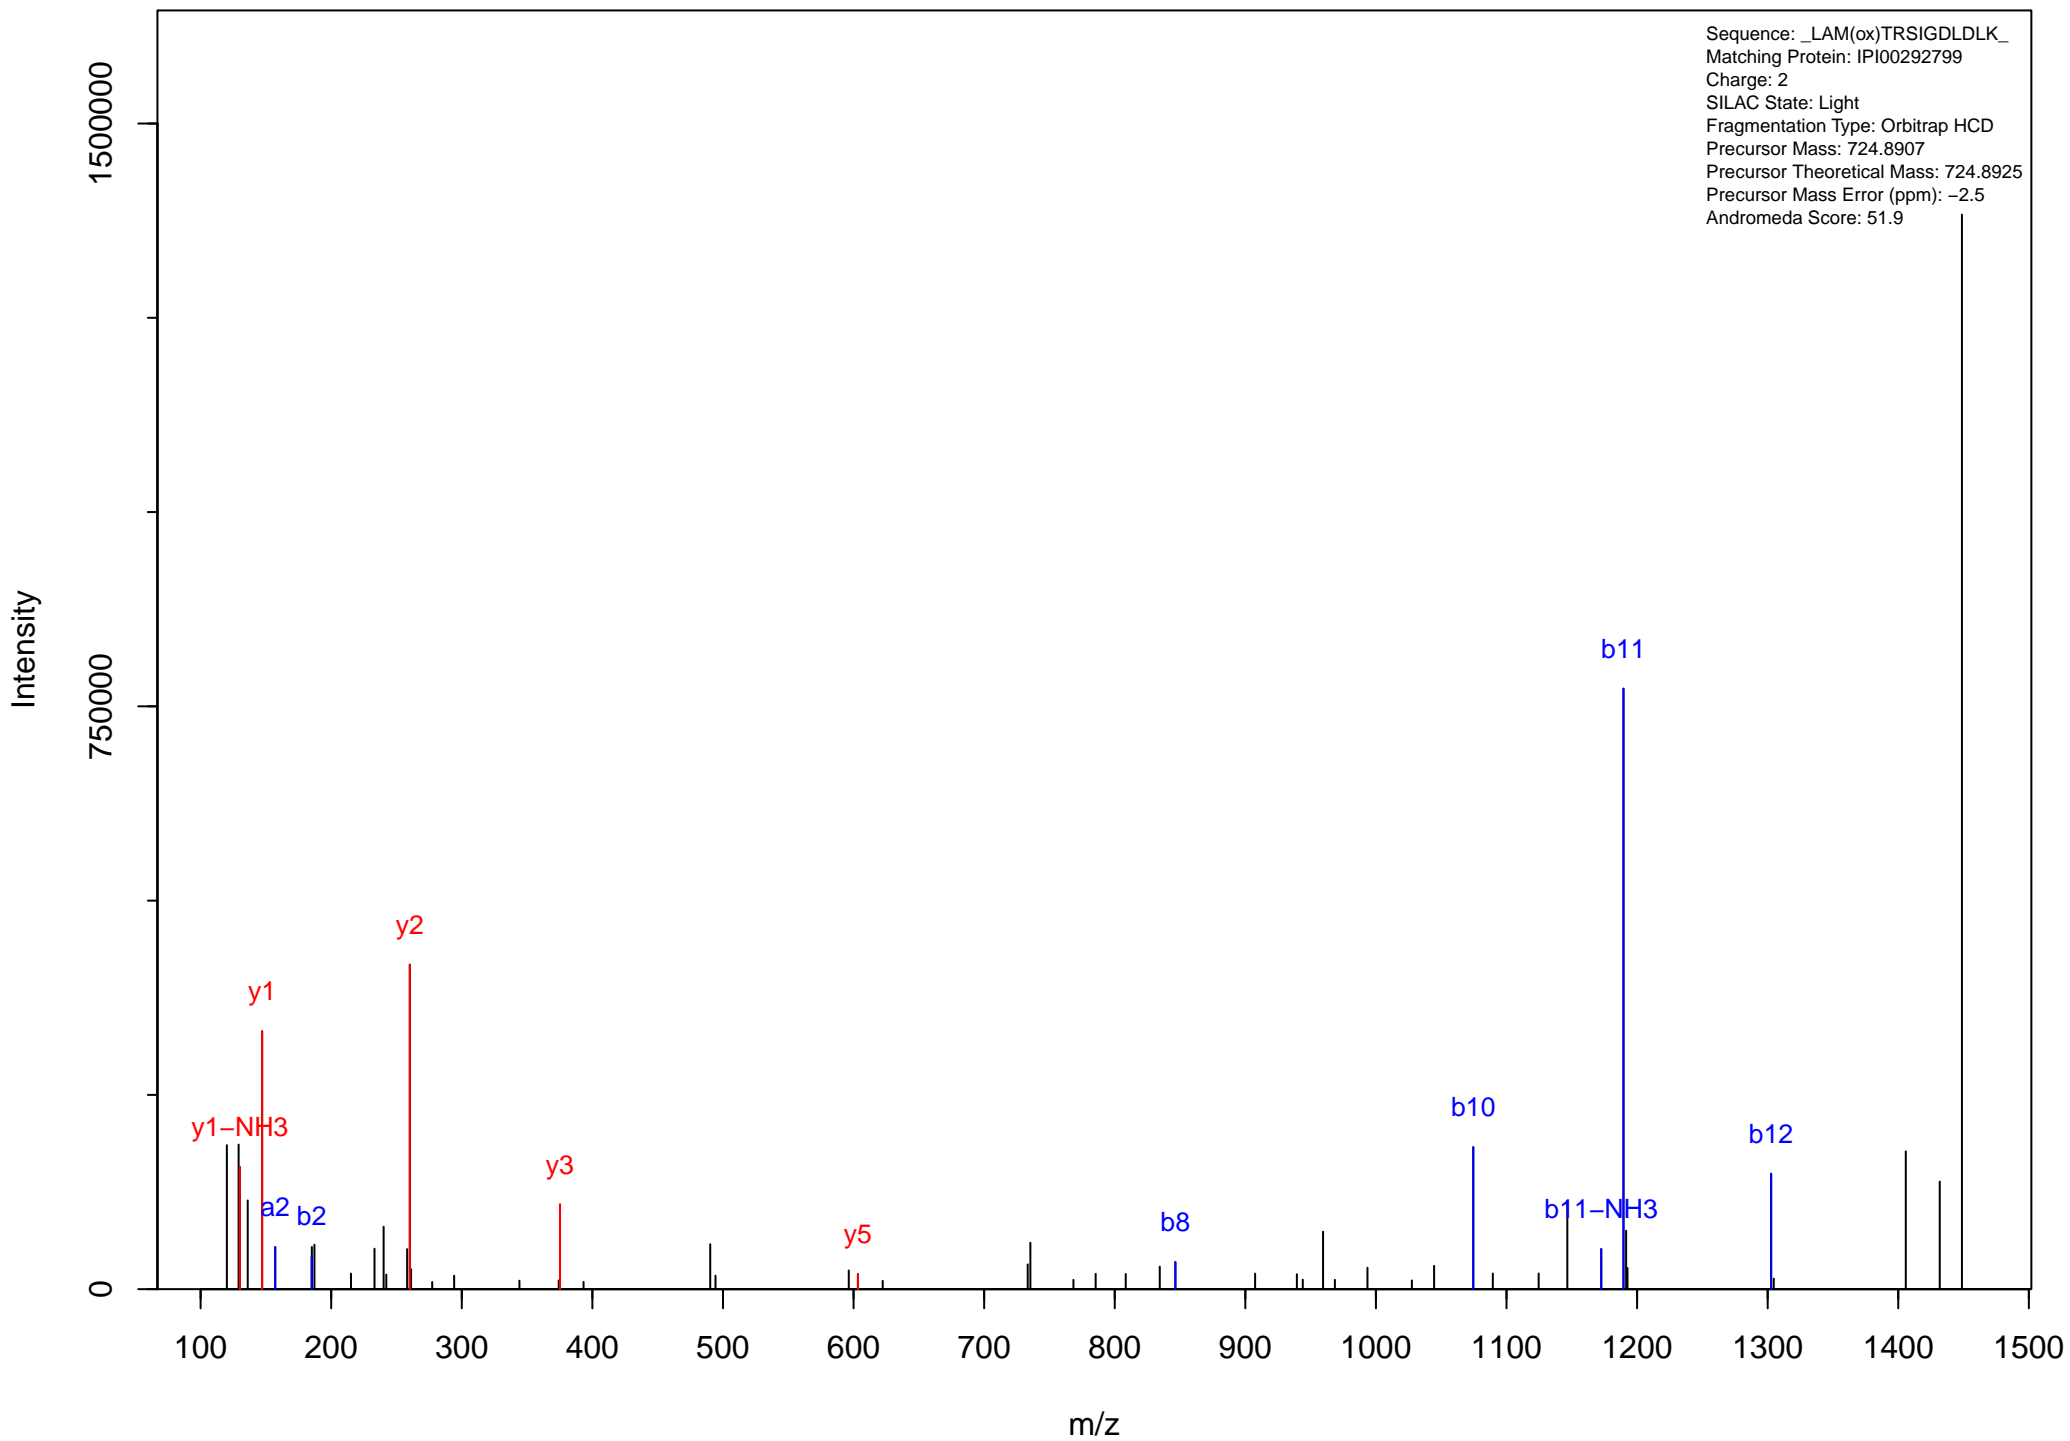

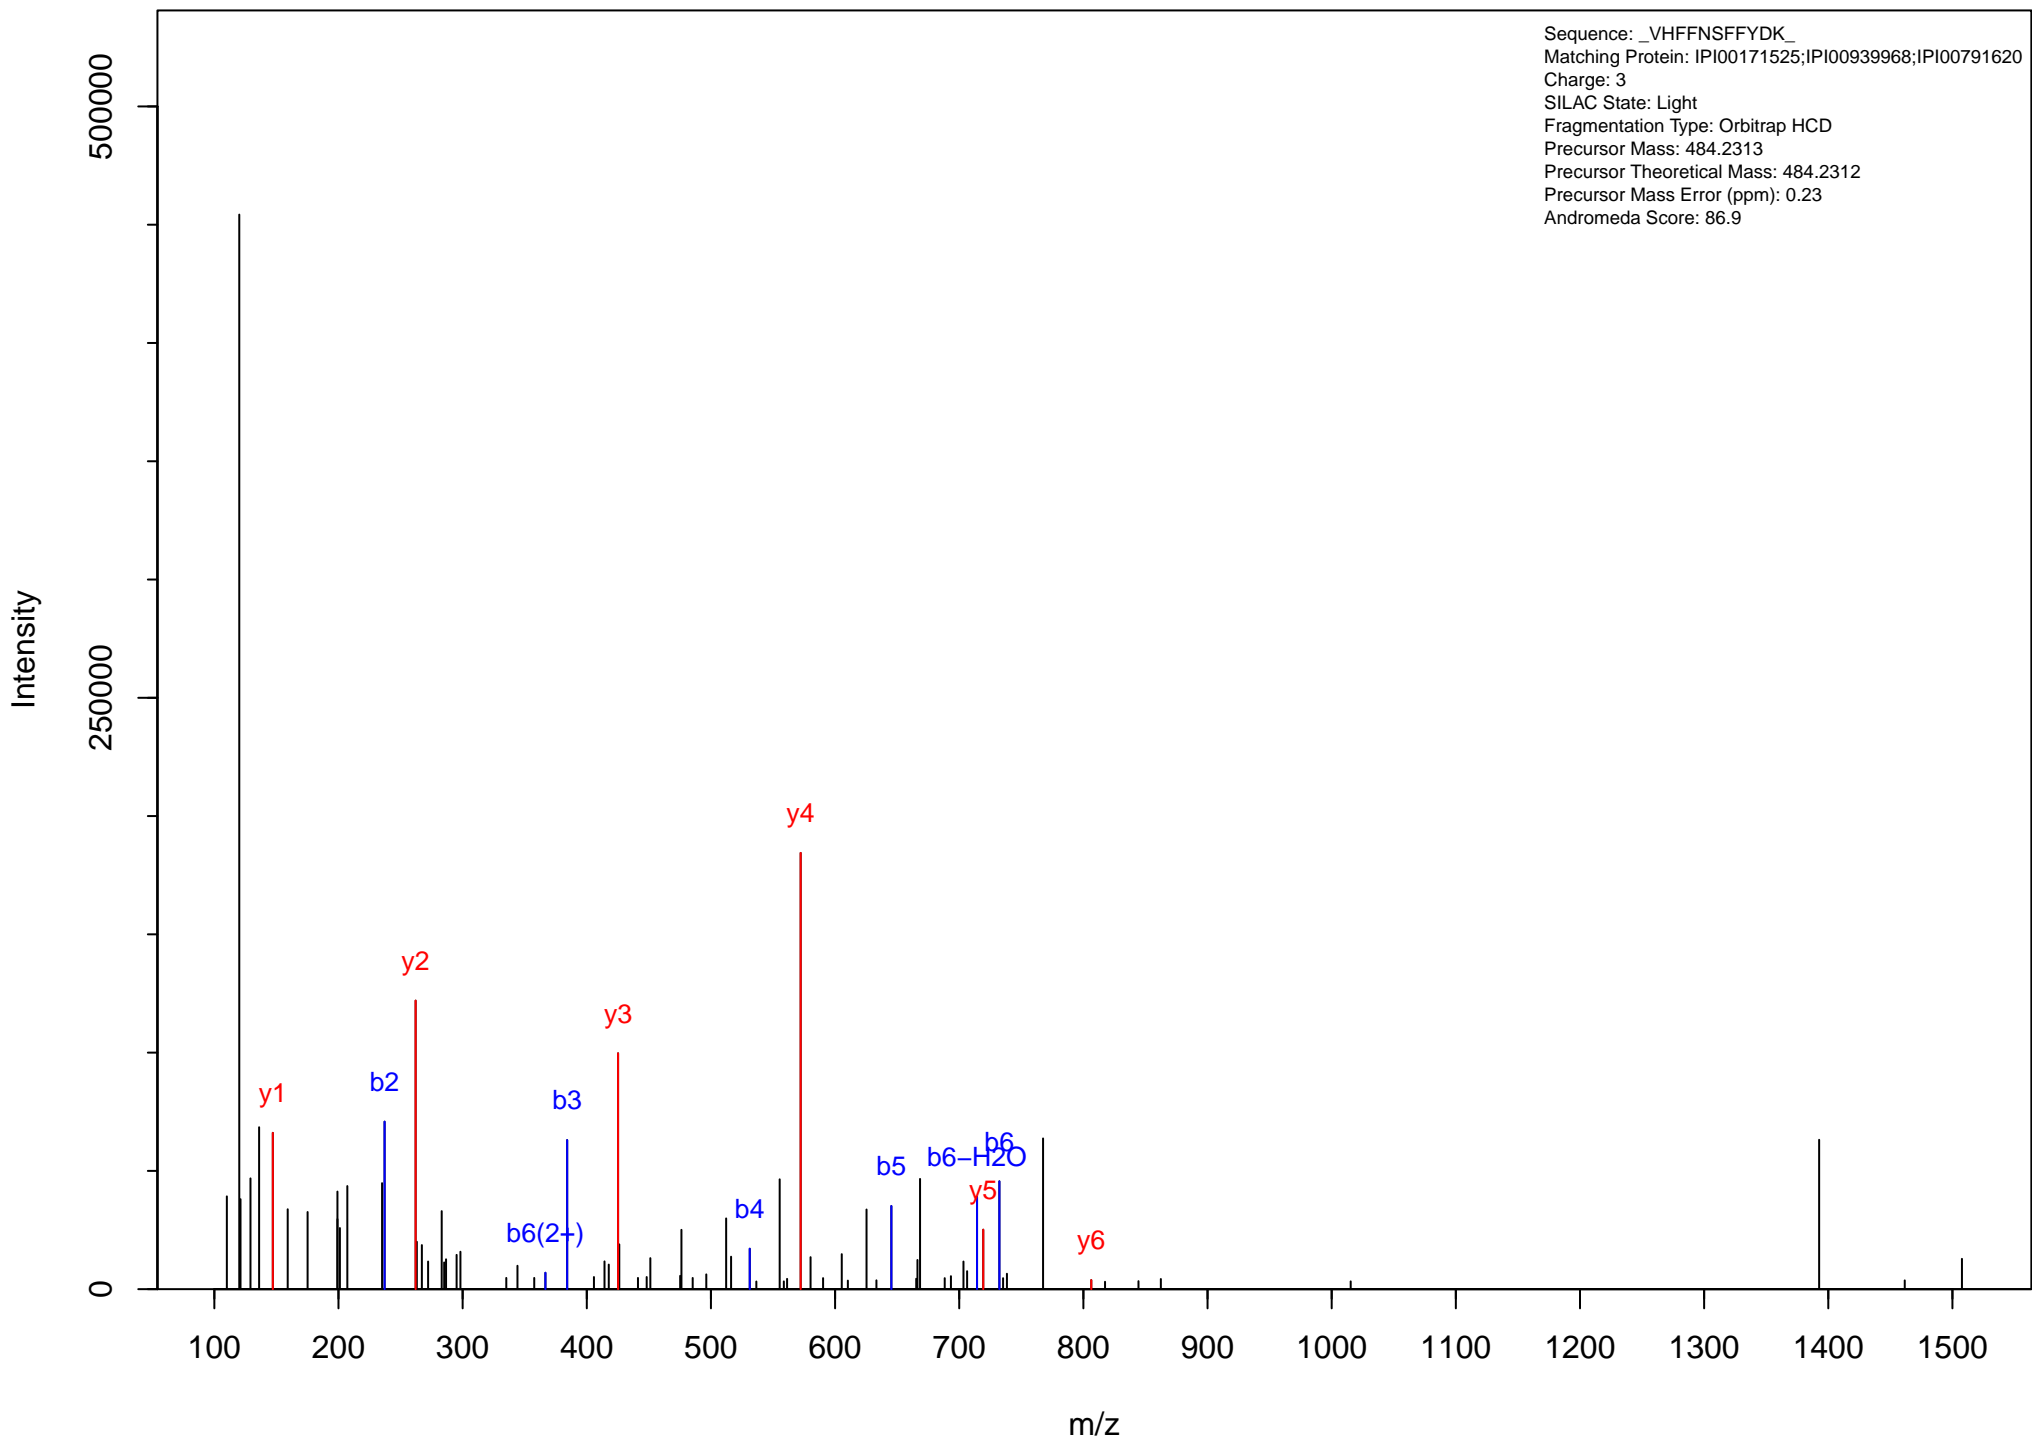

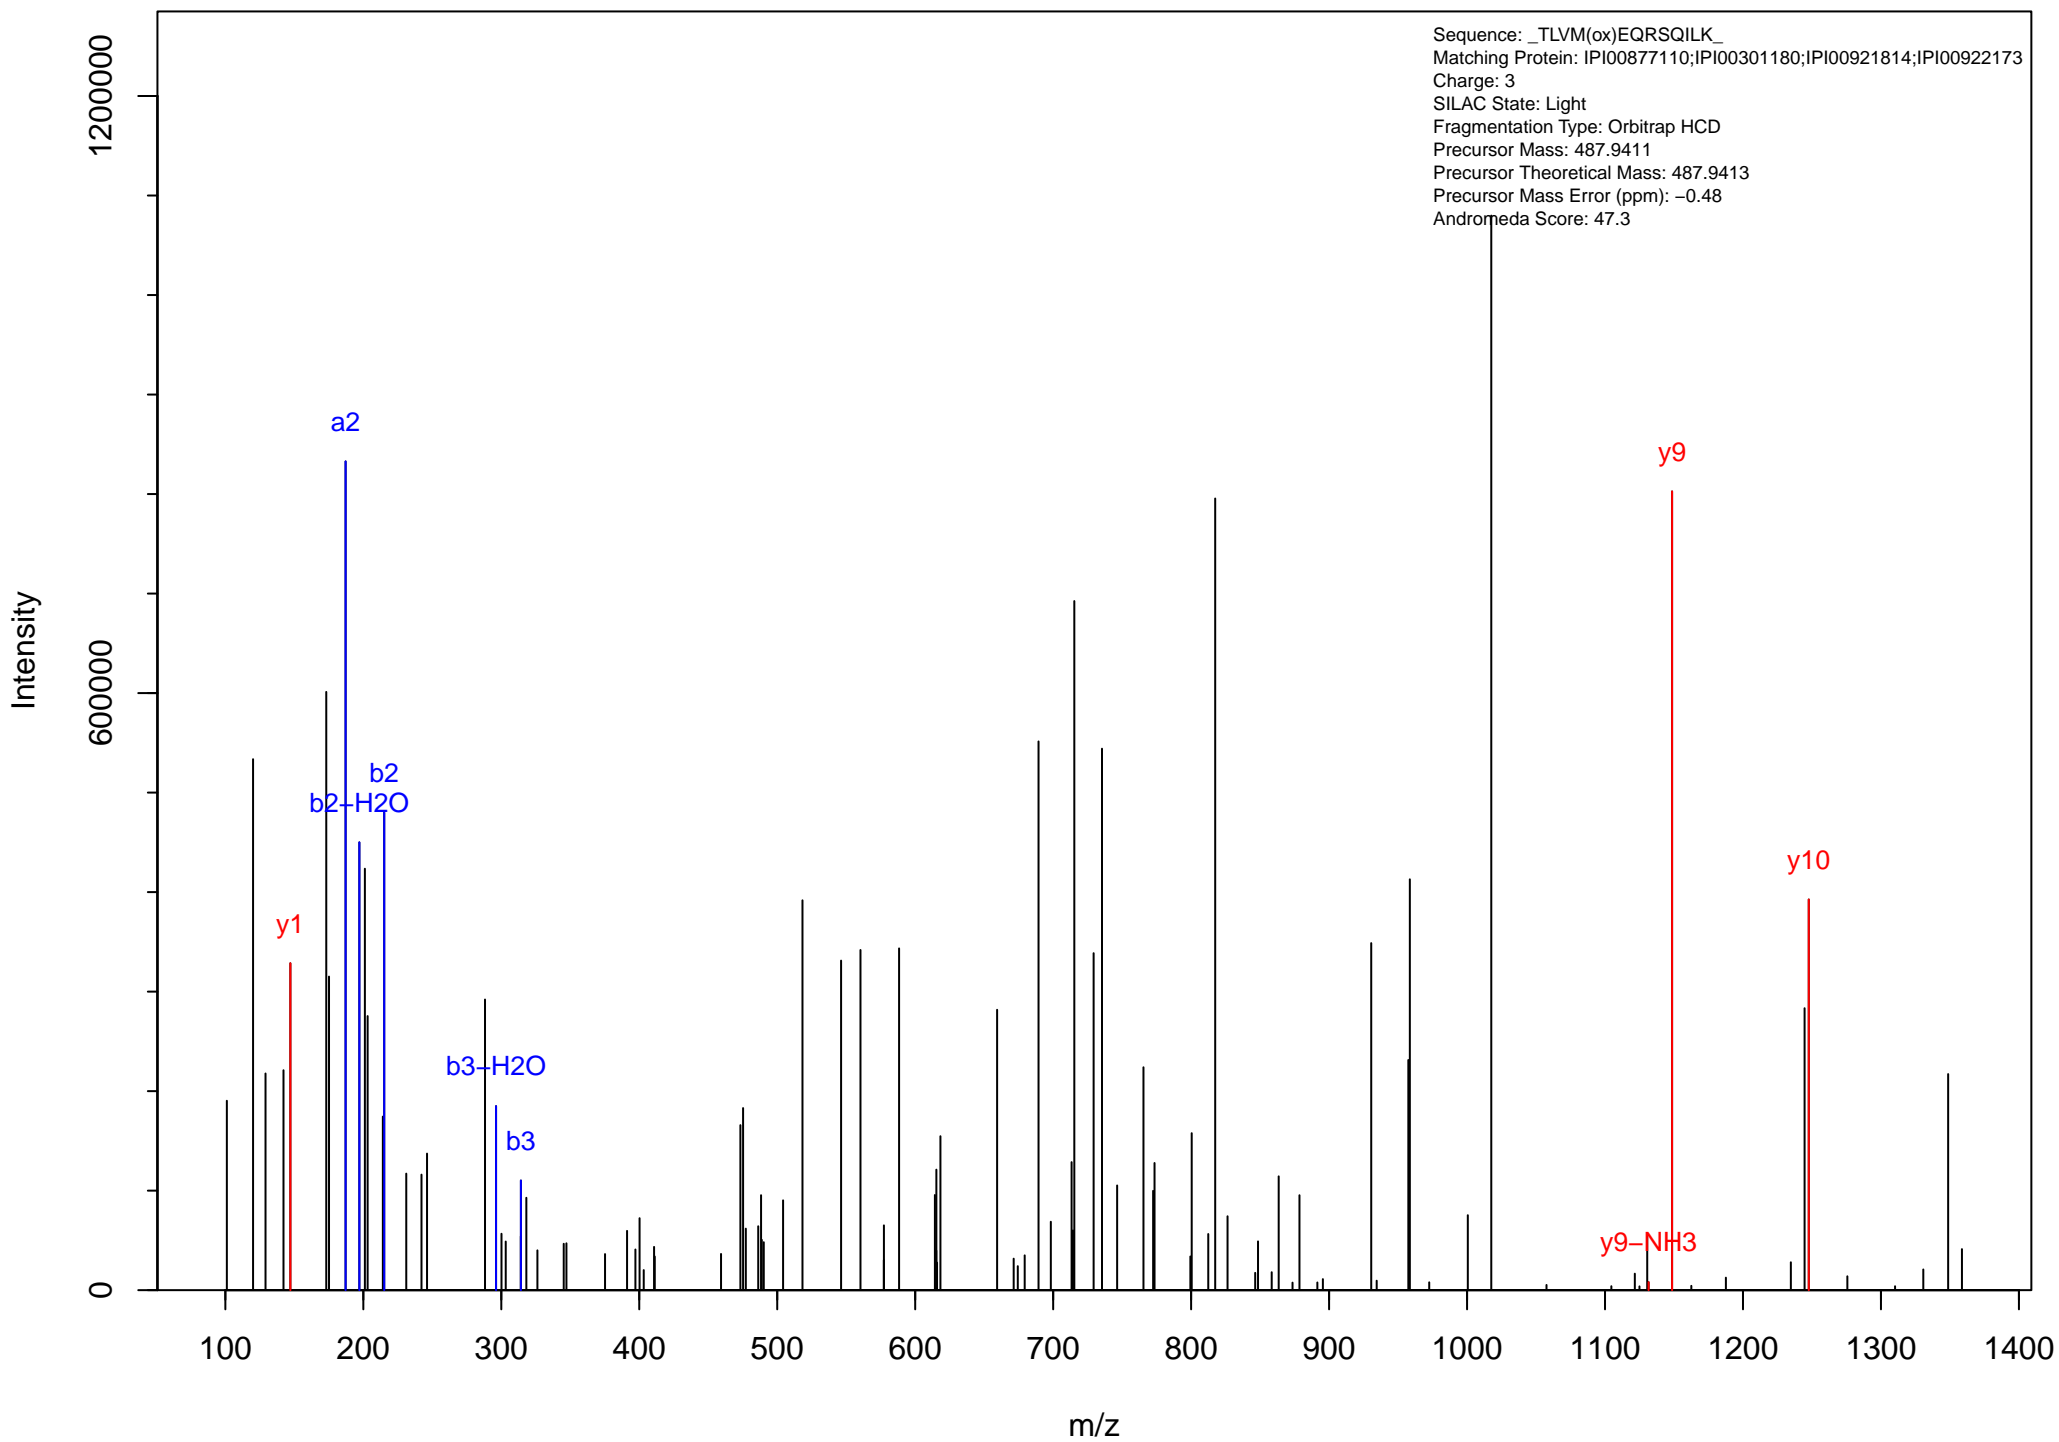

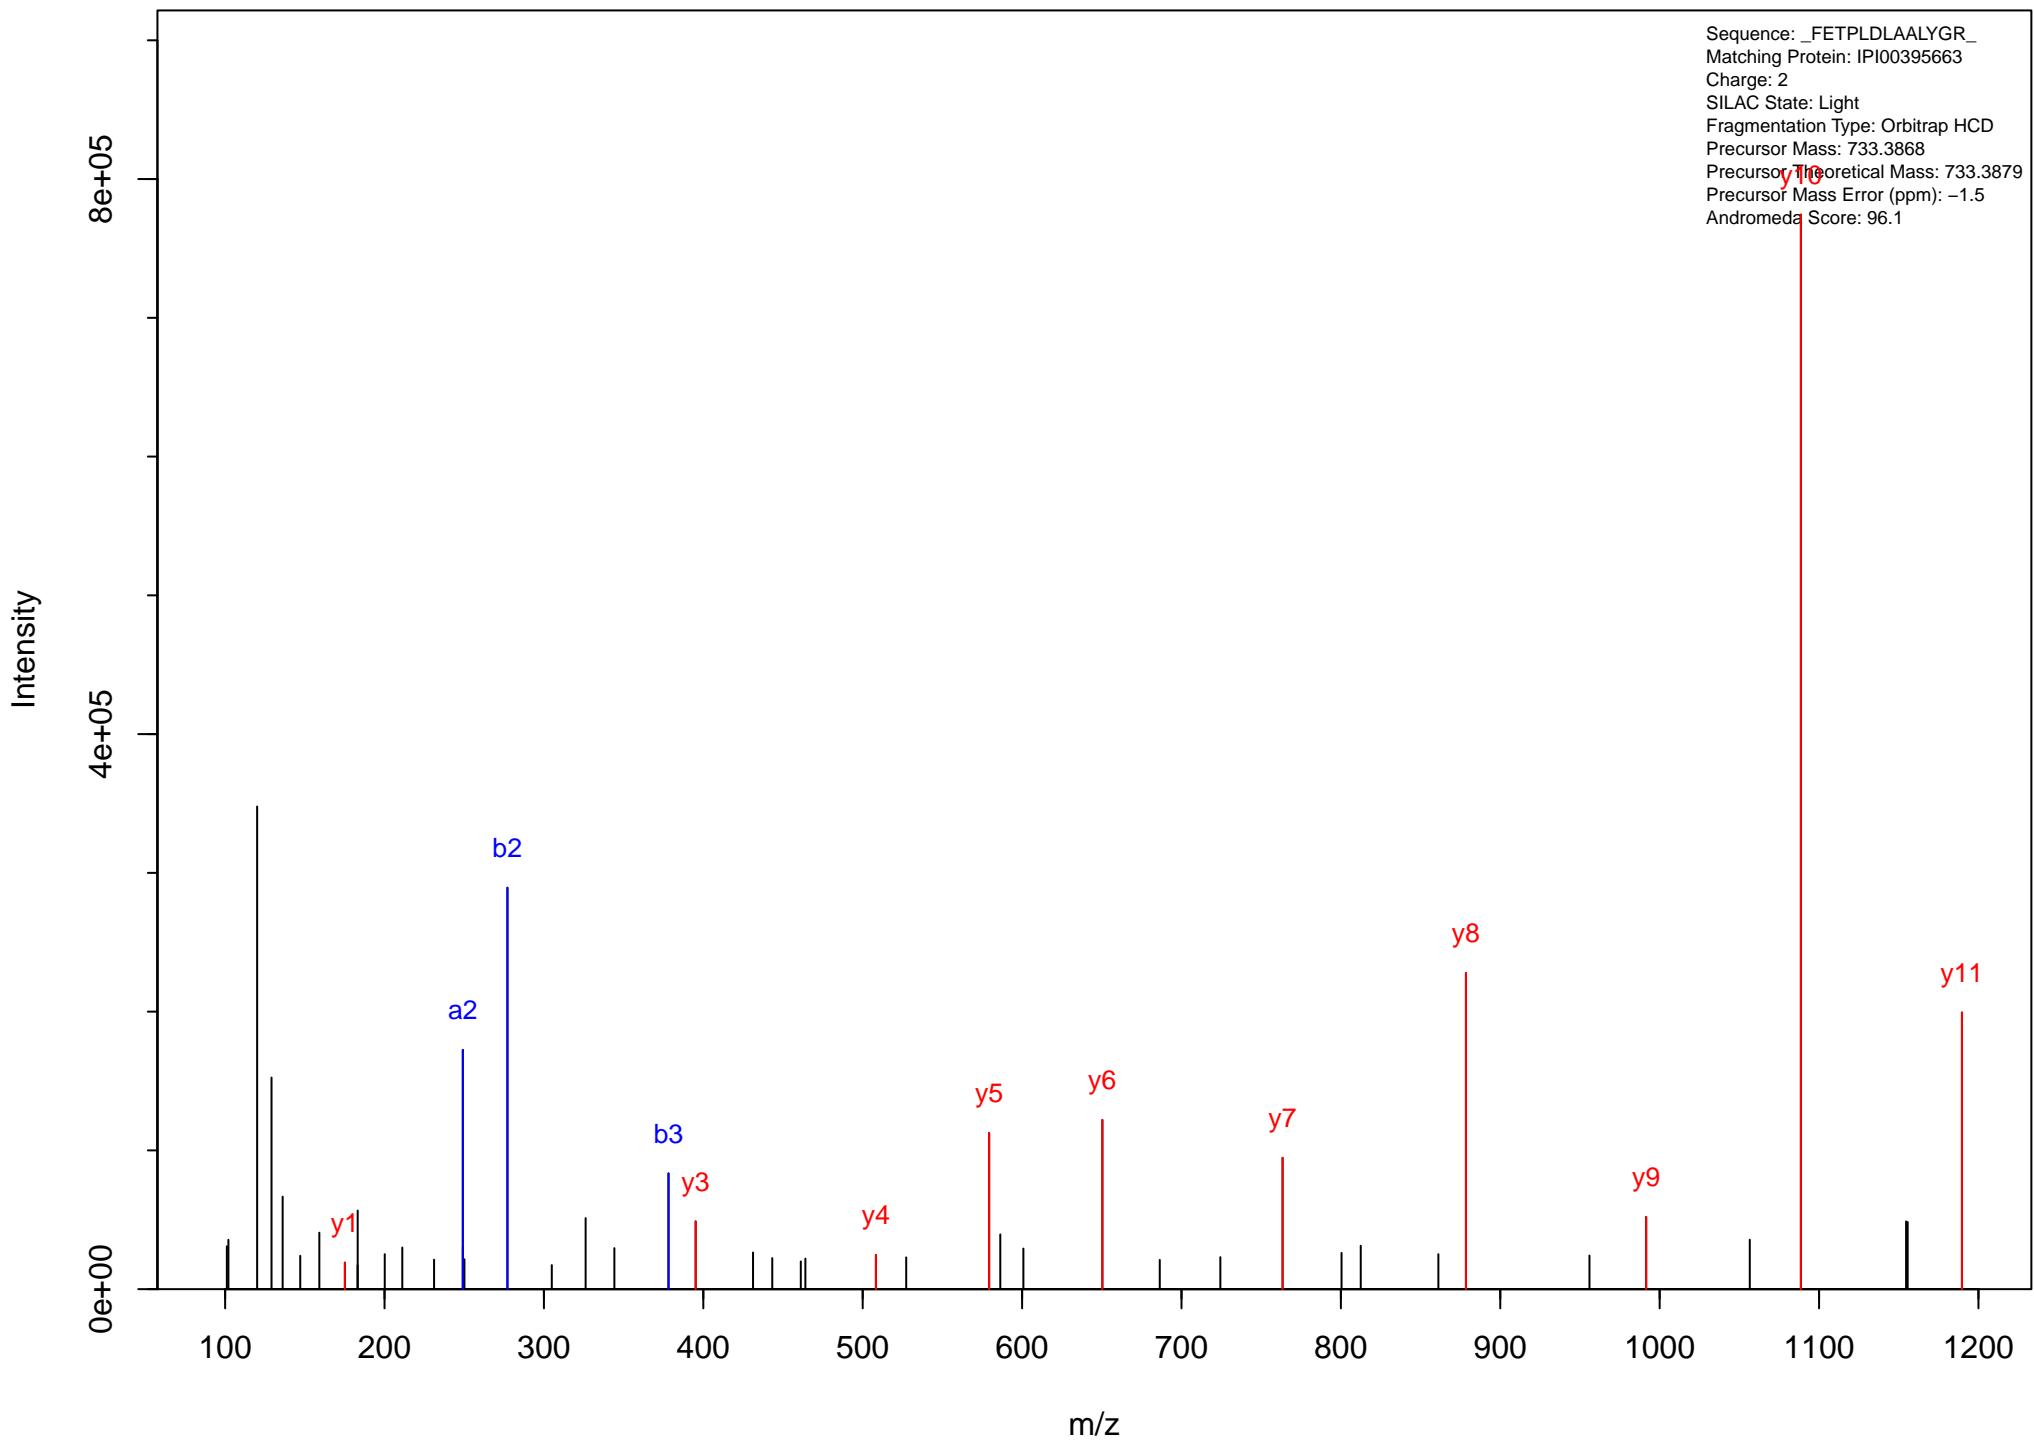

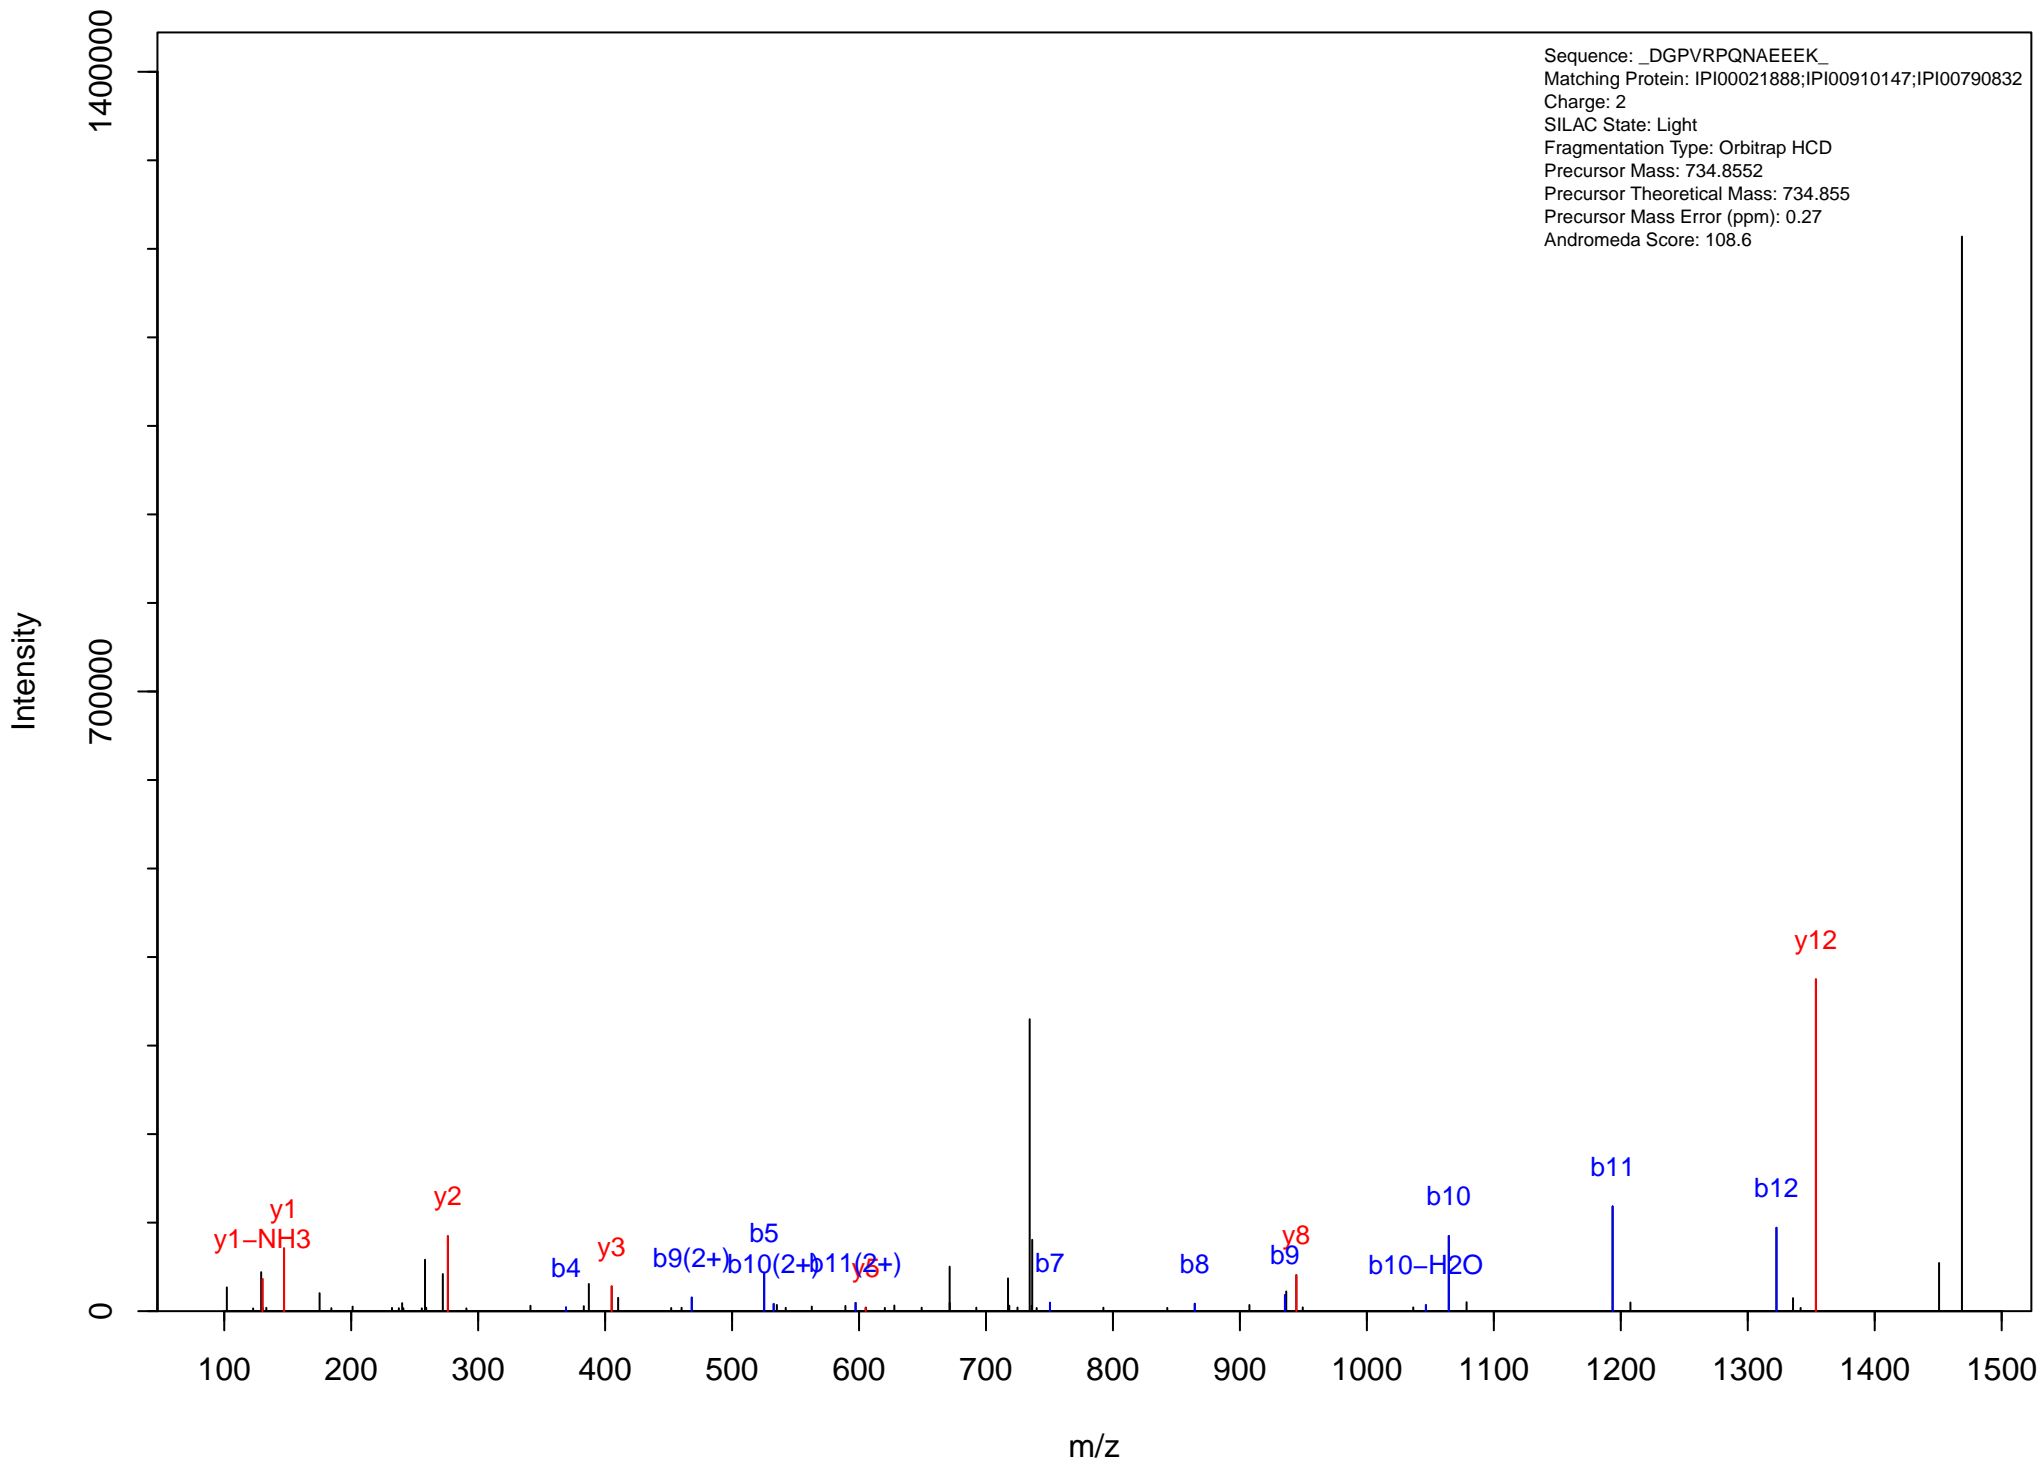

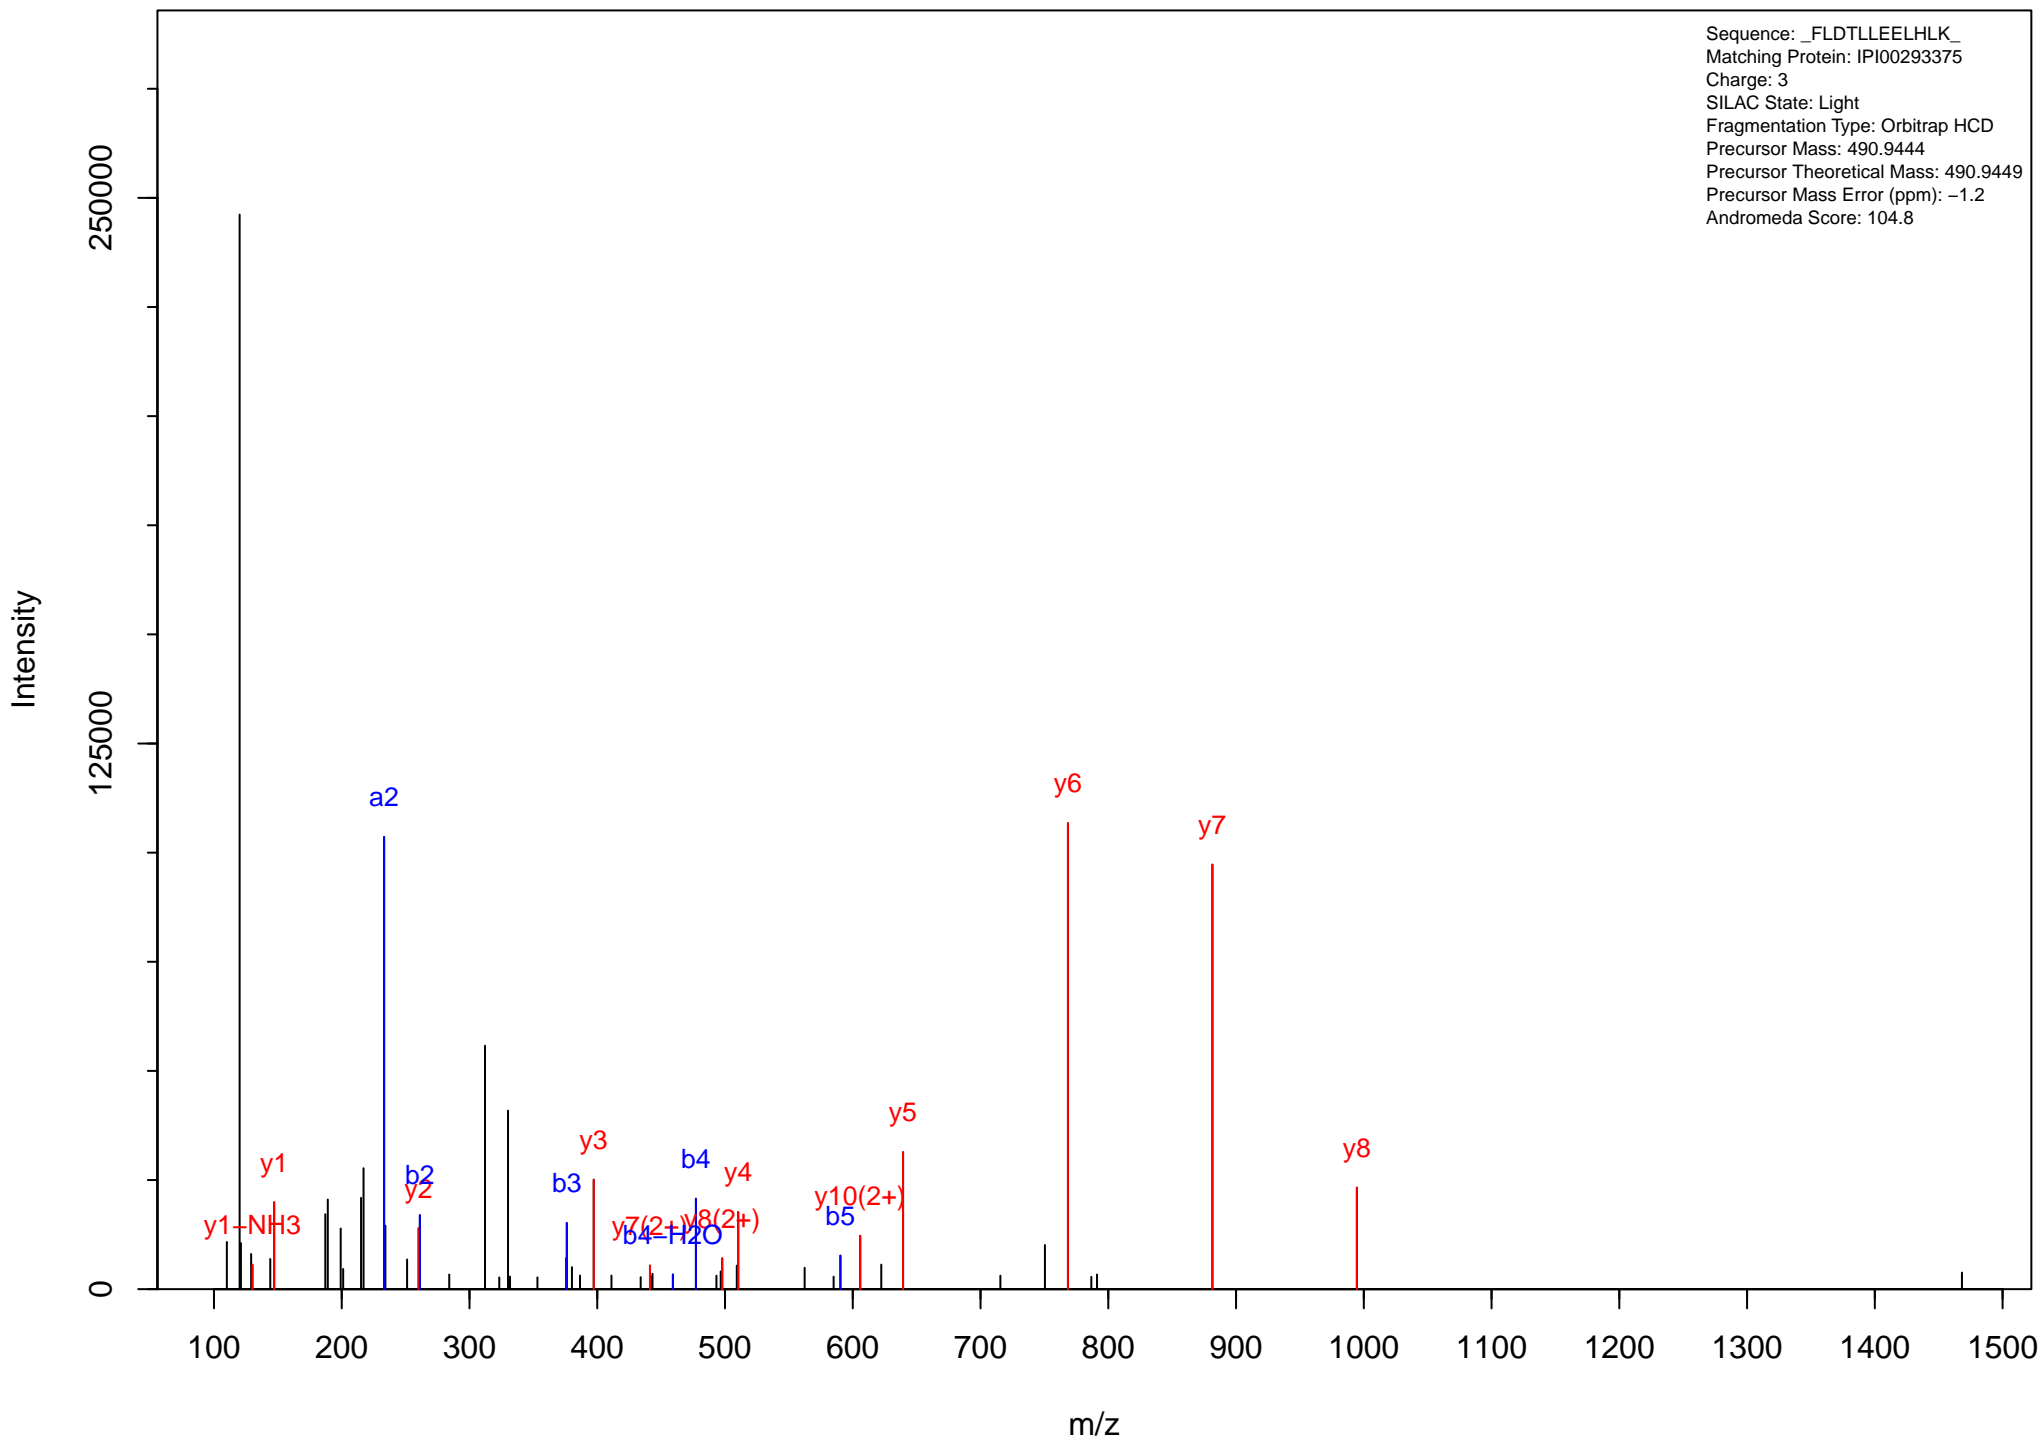

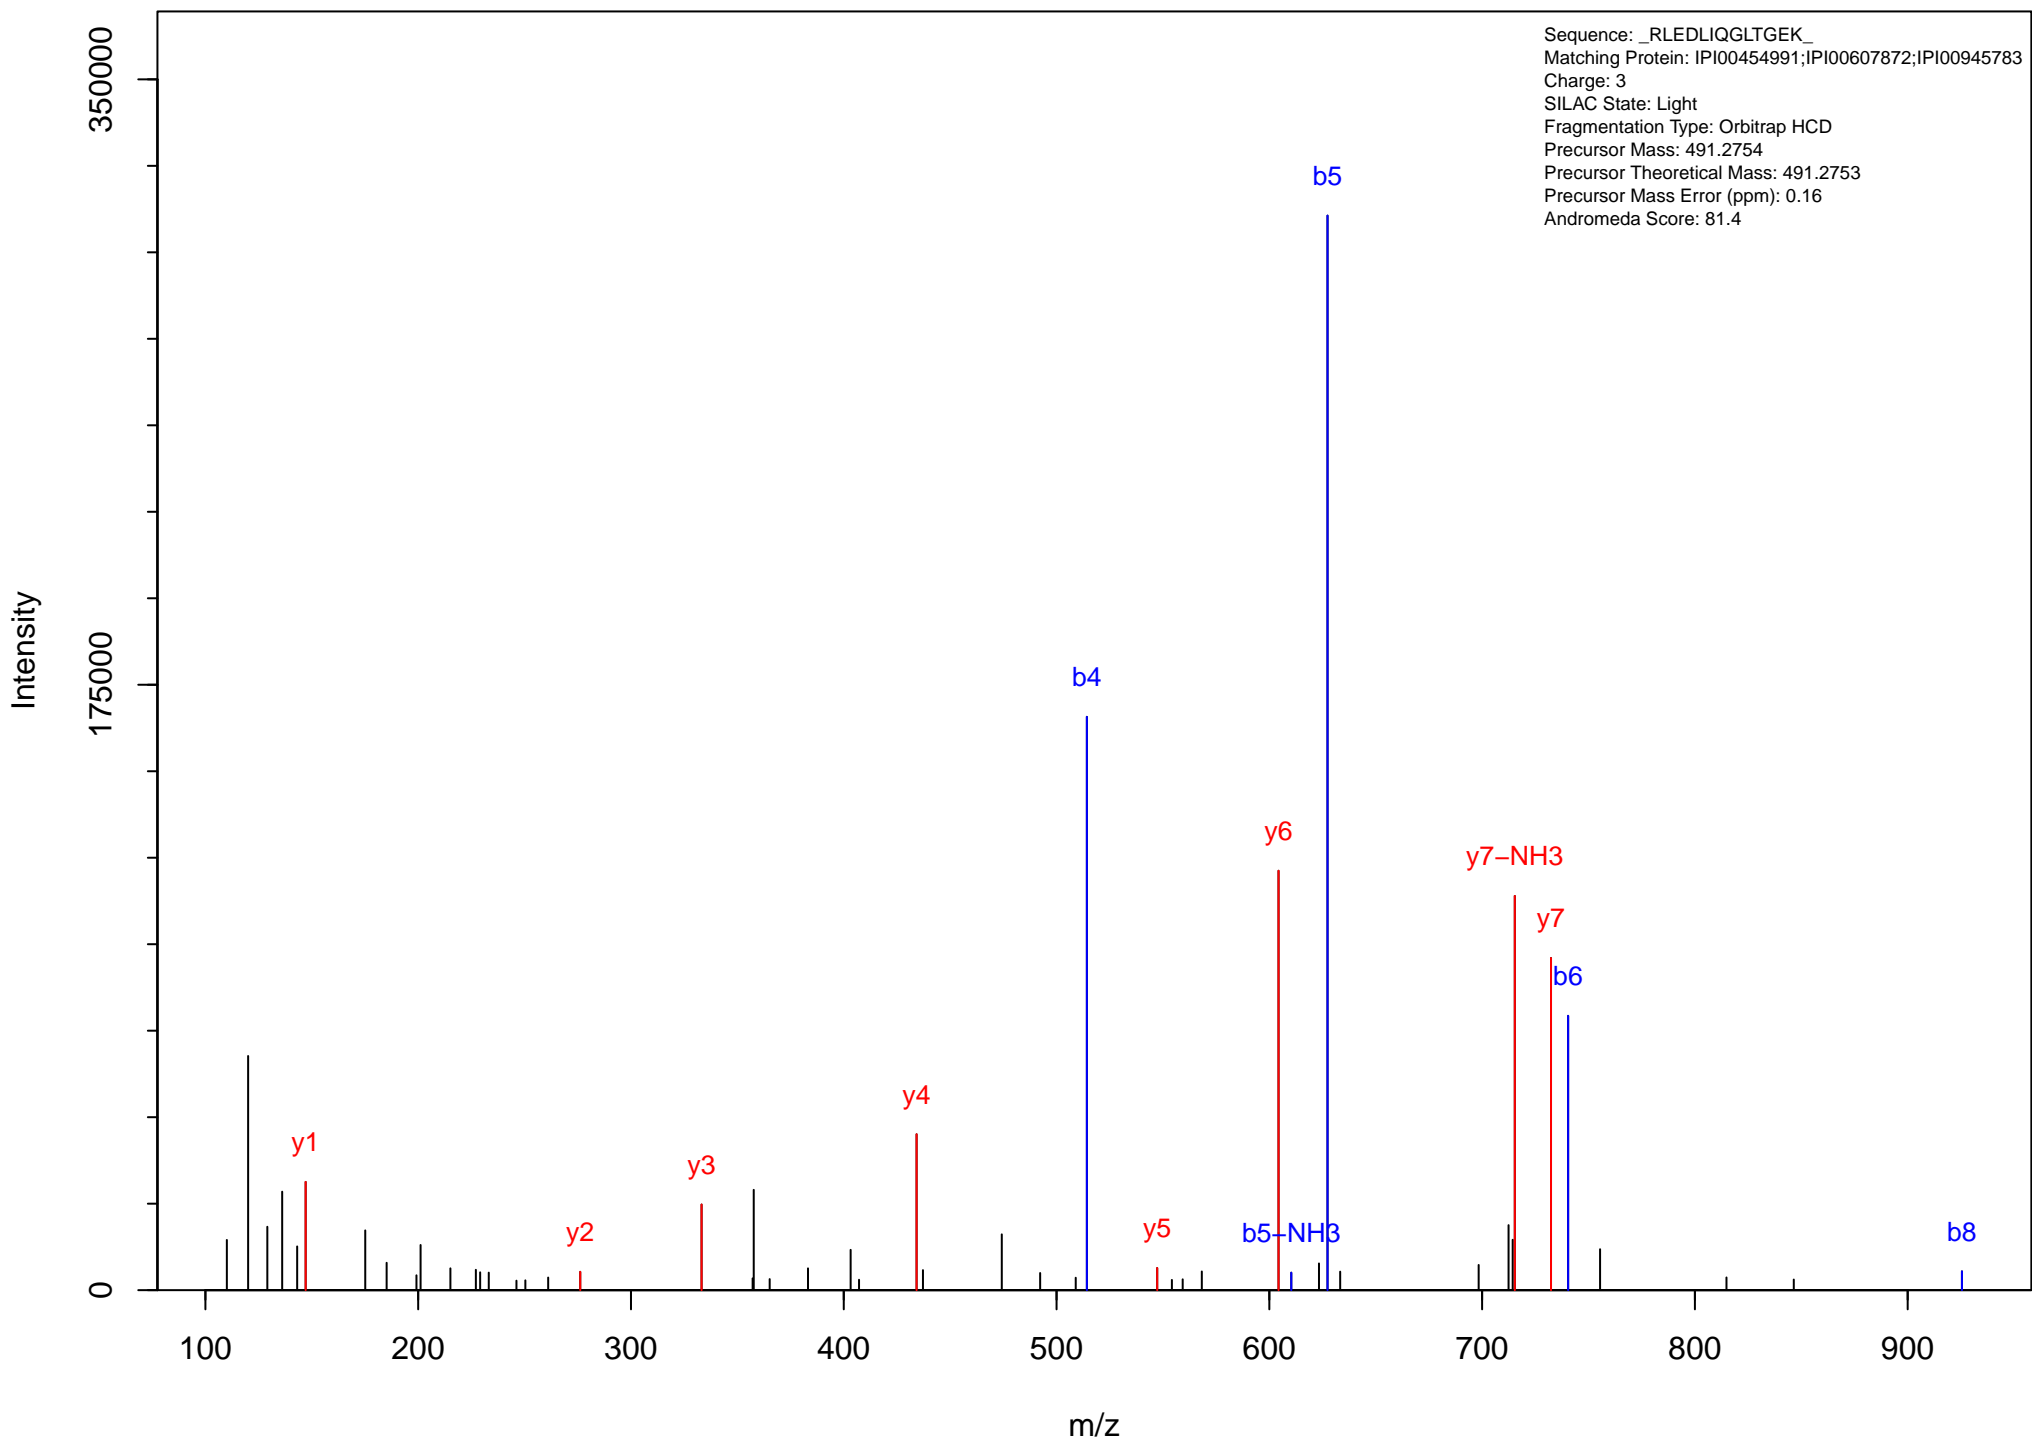

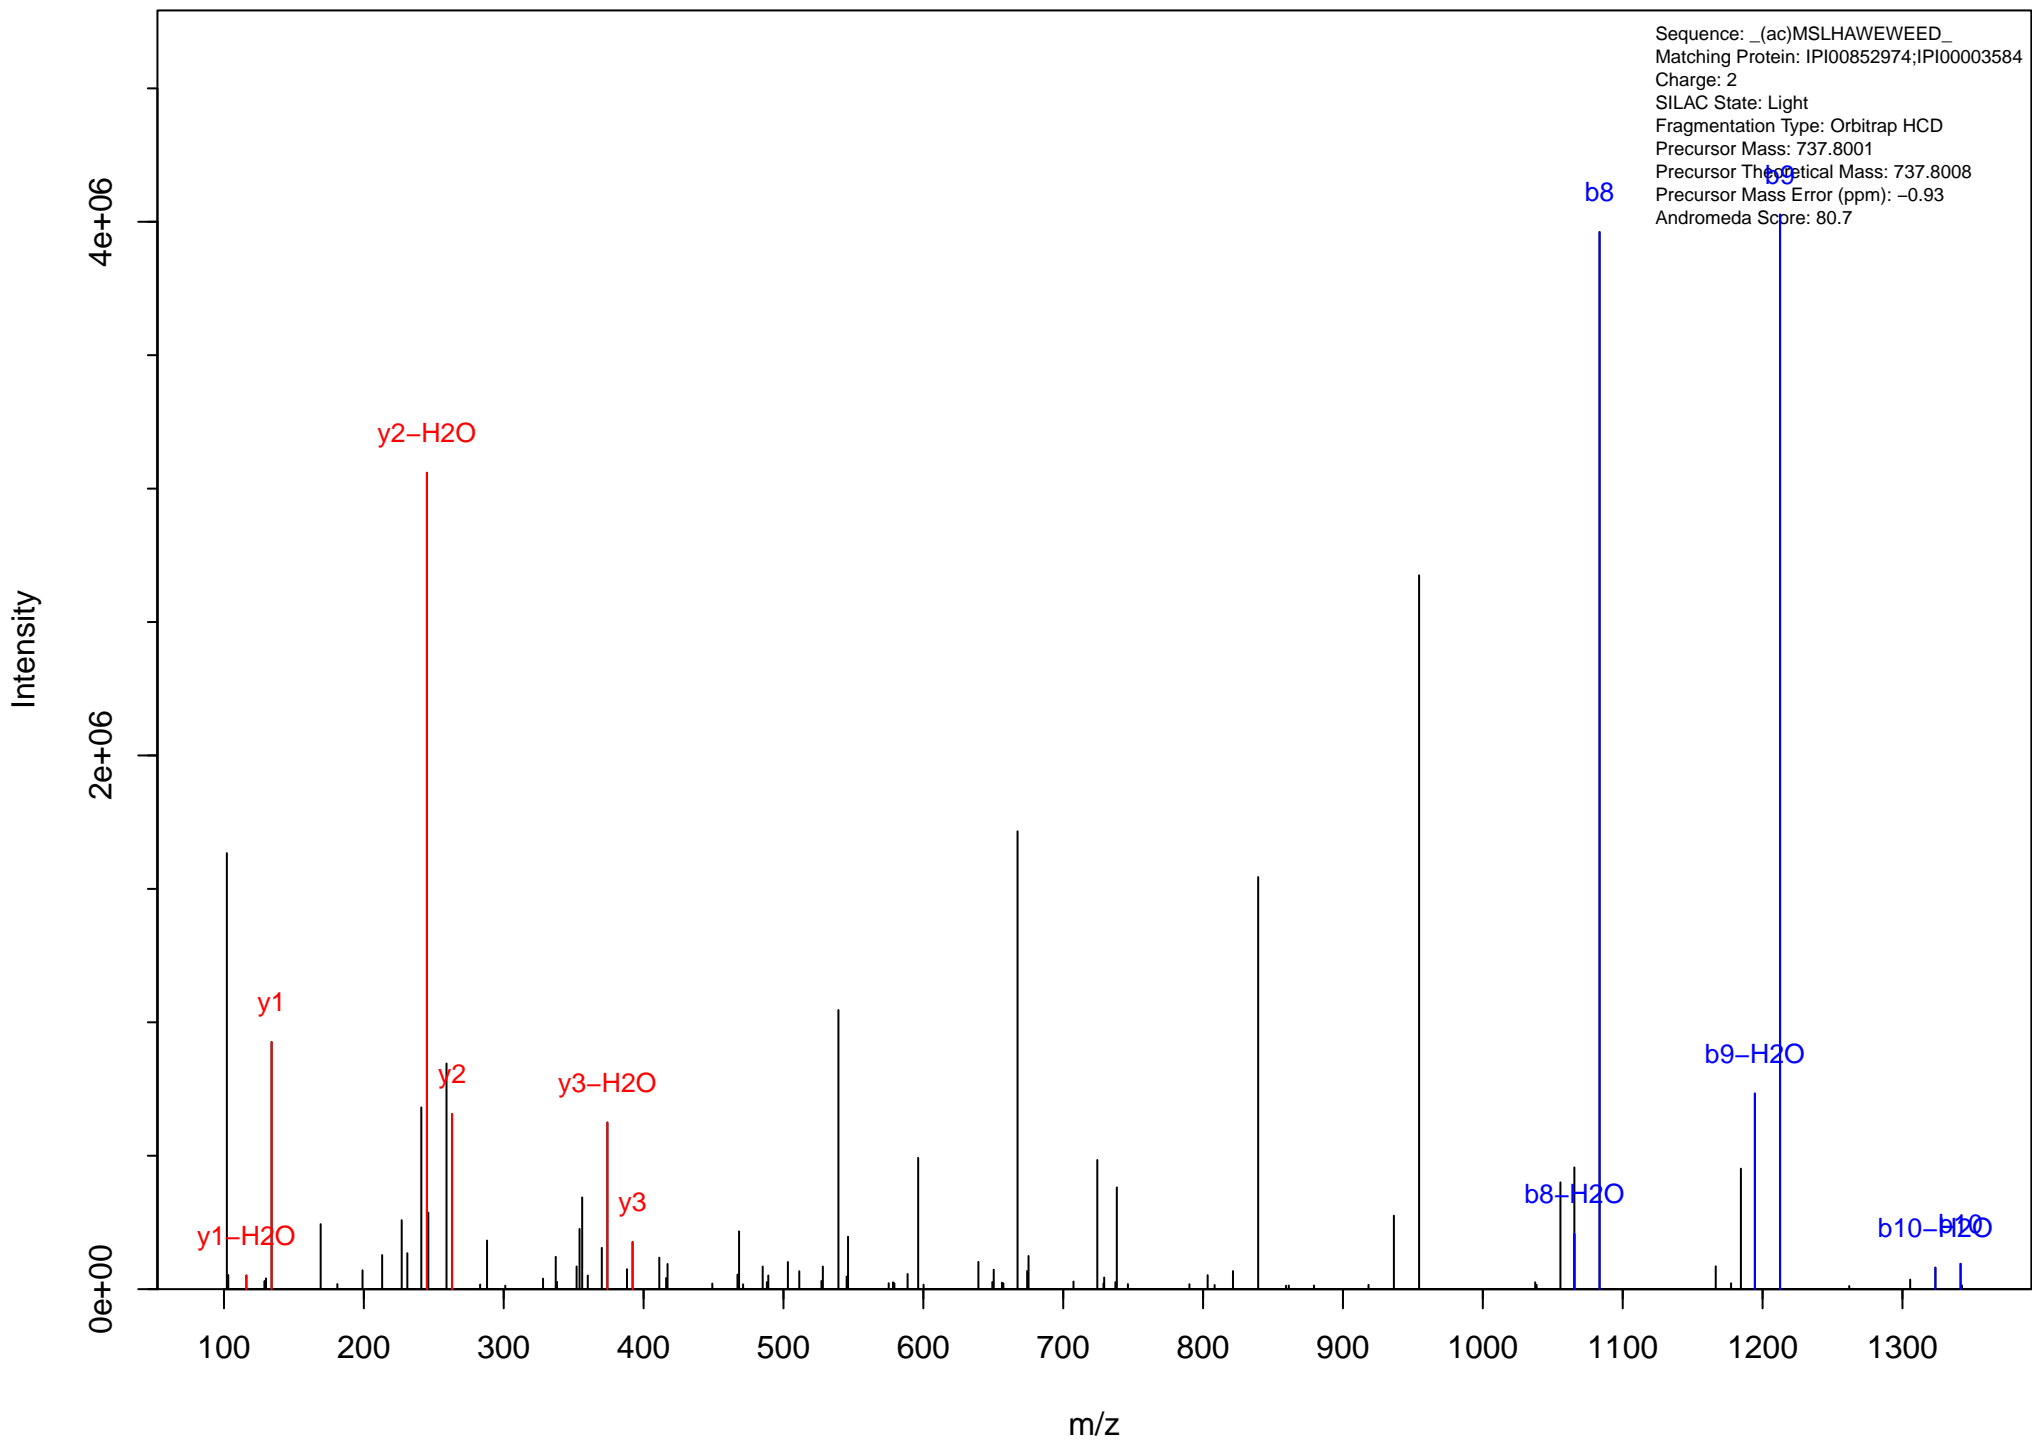

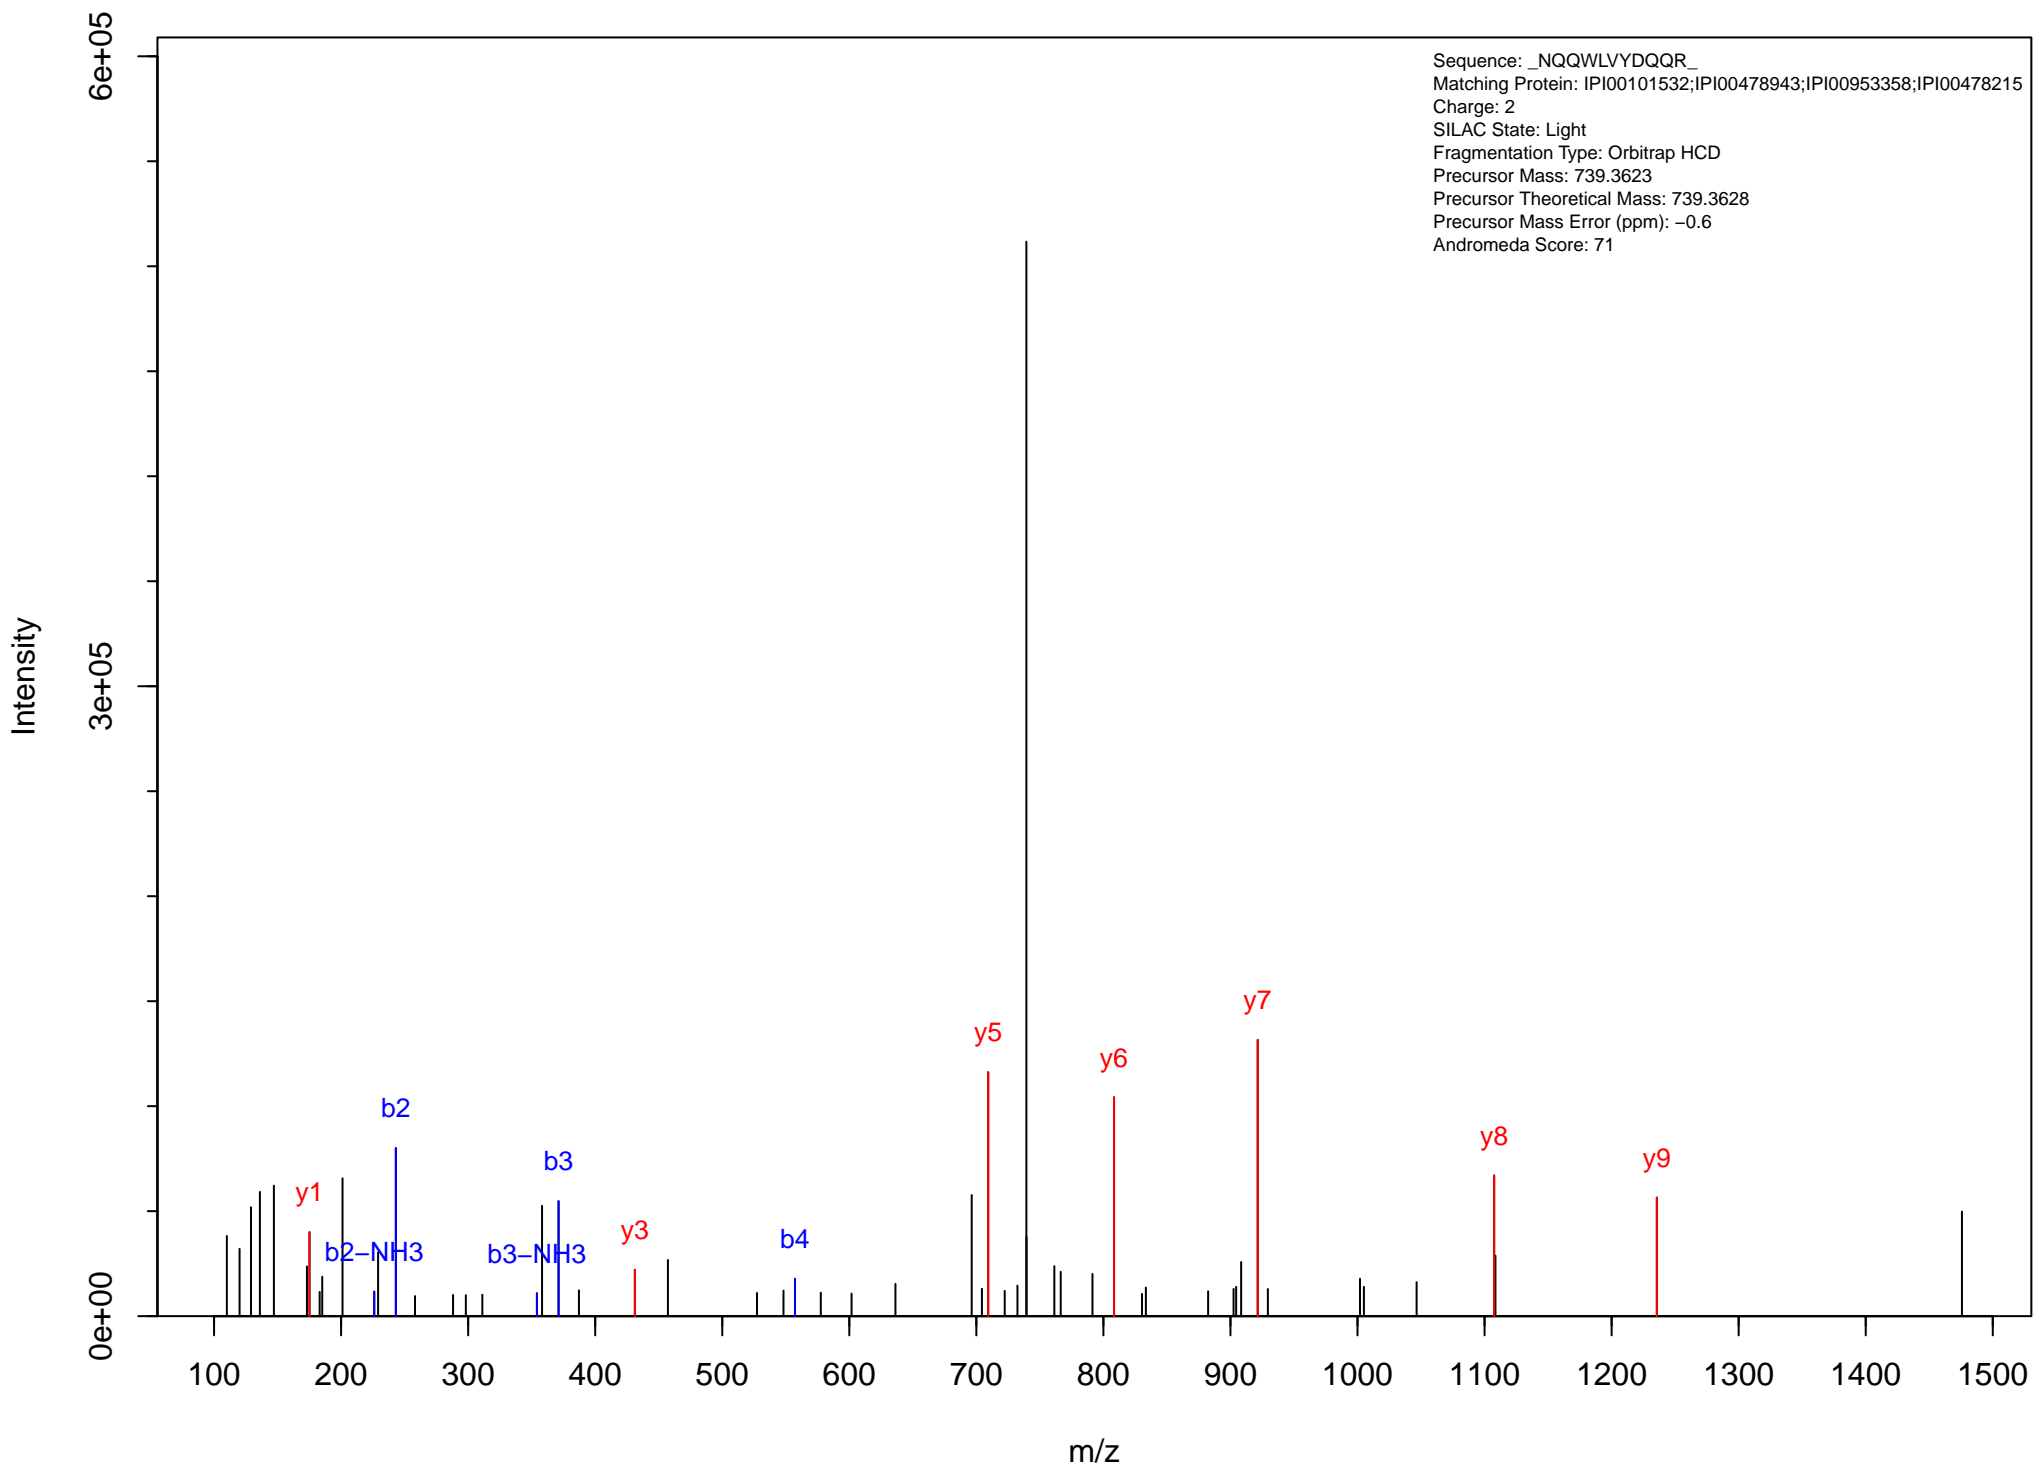

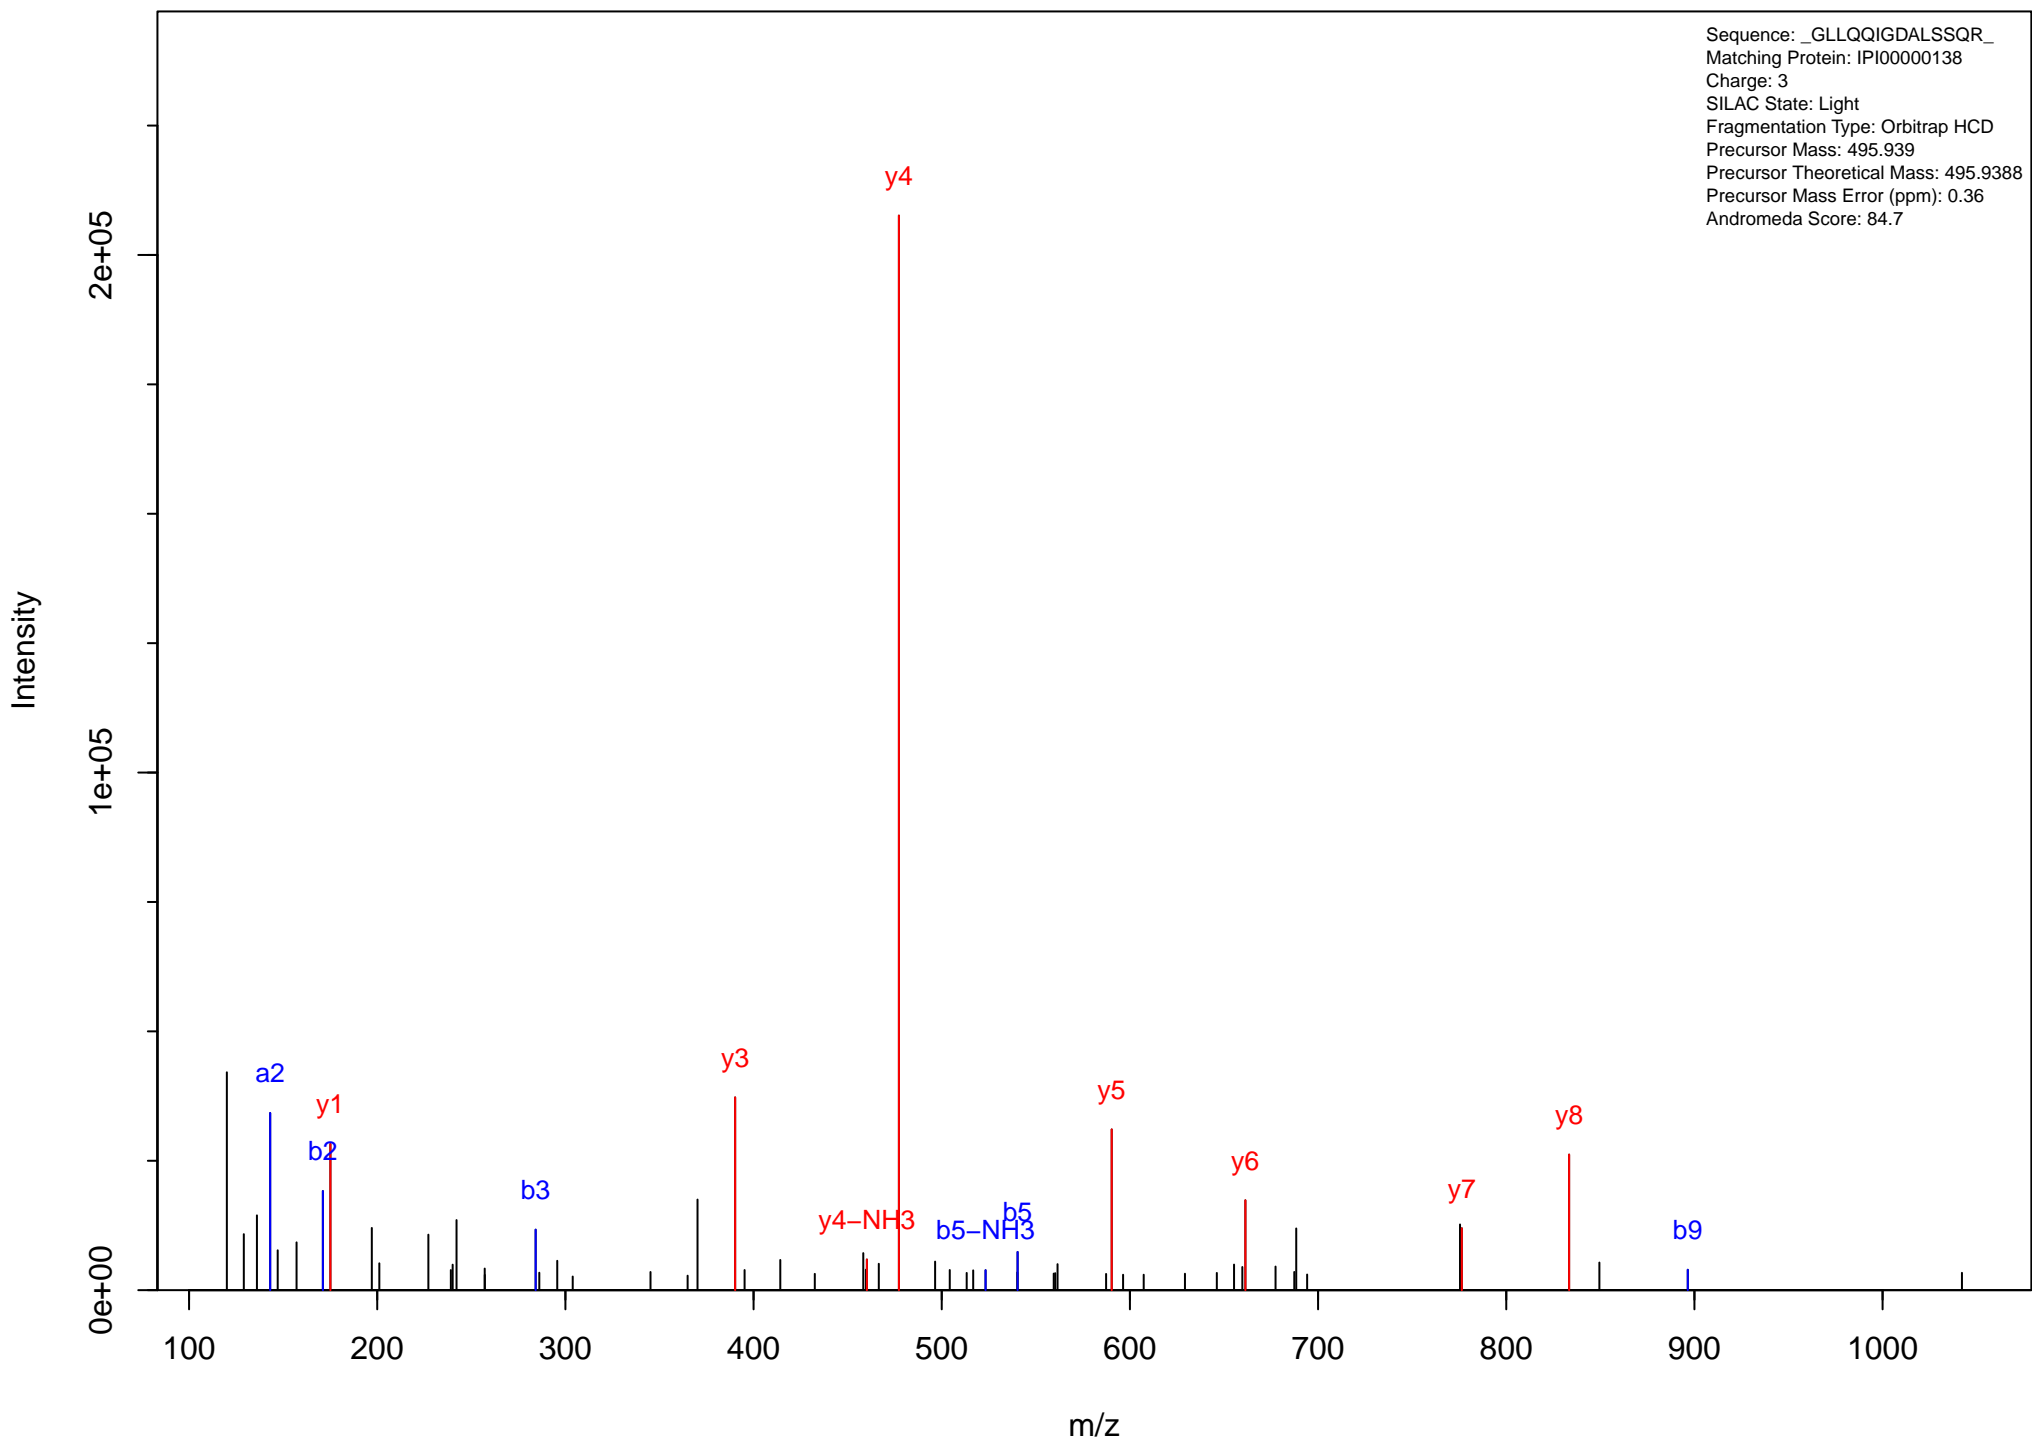

Intensity

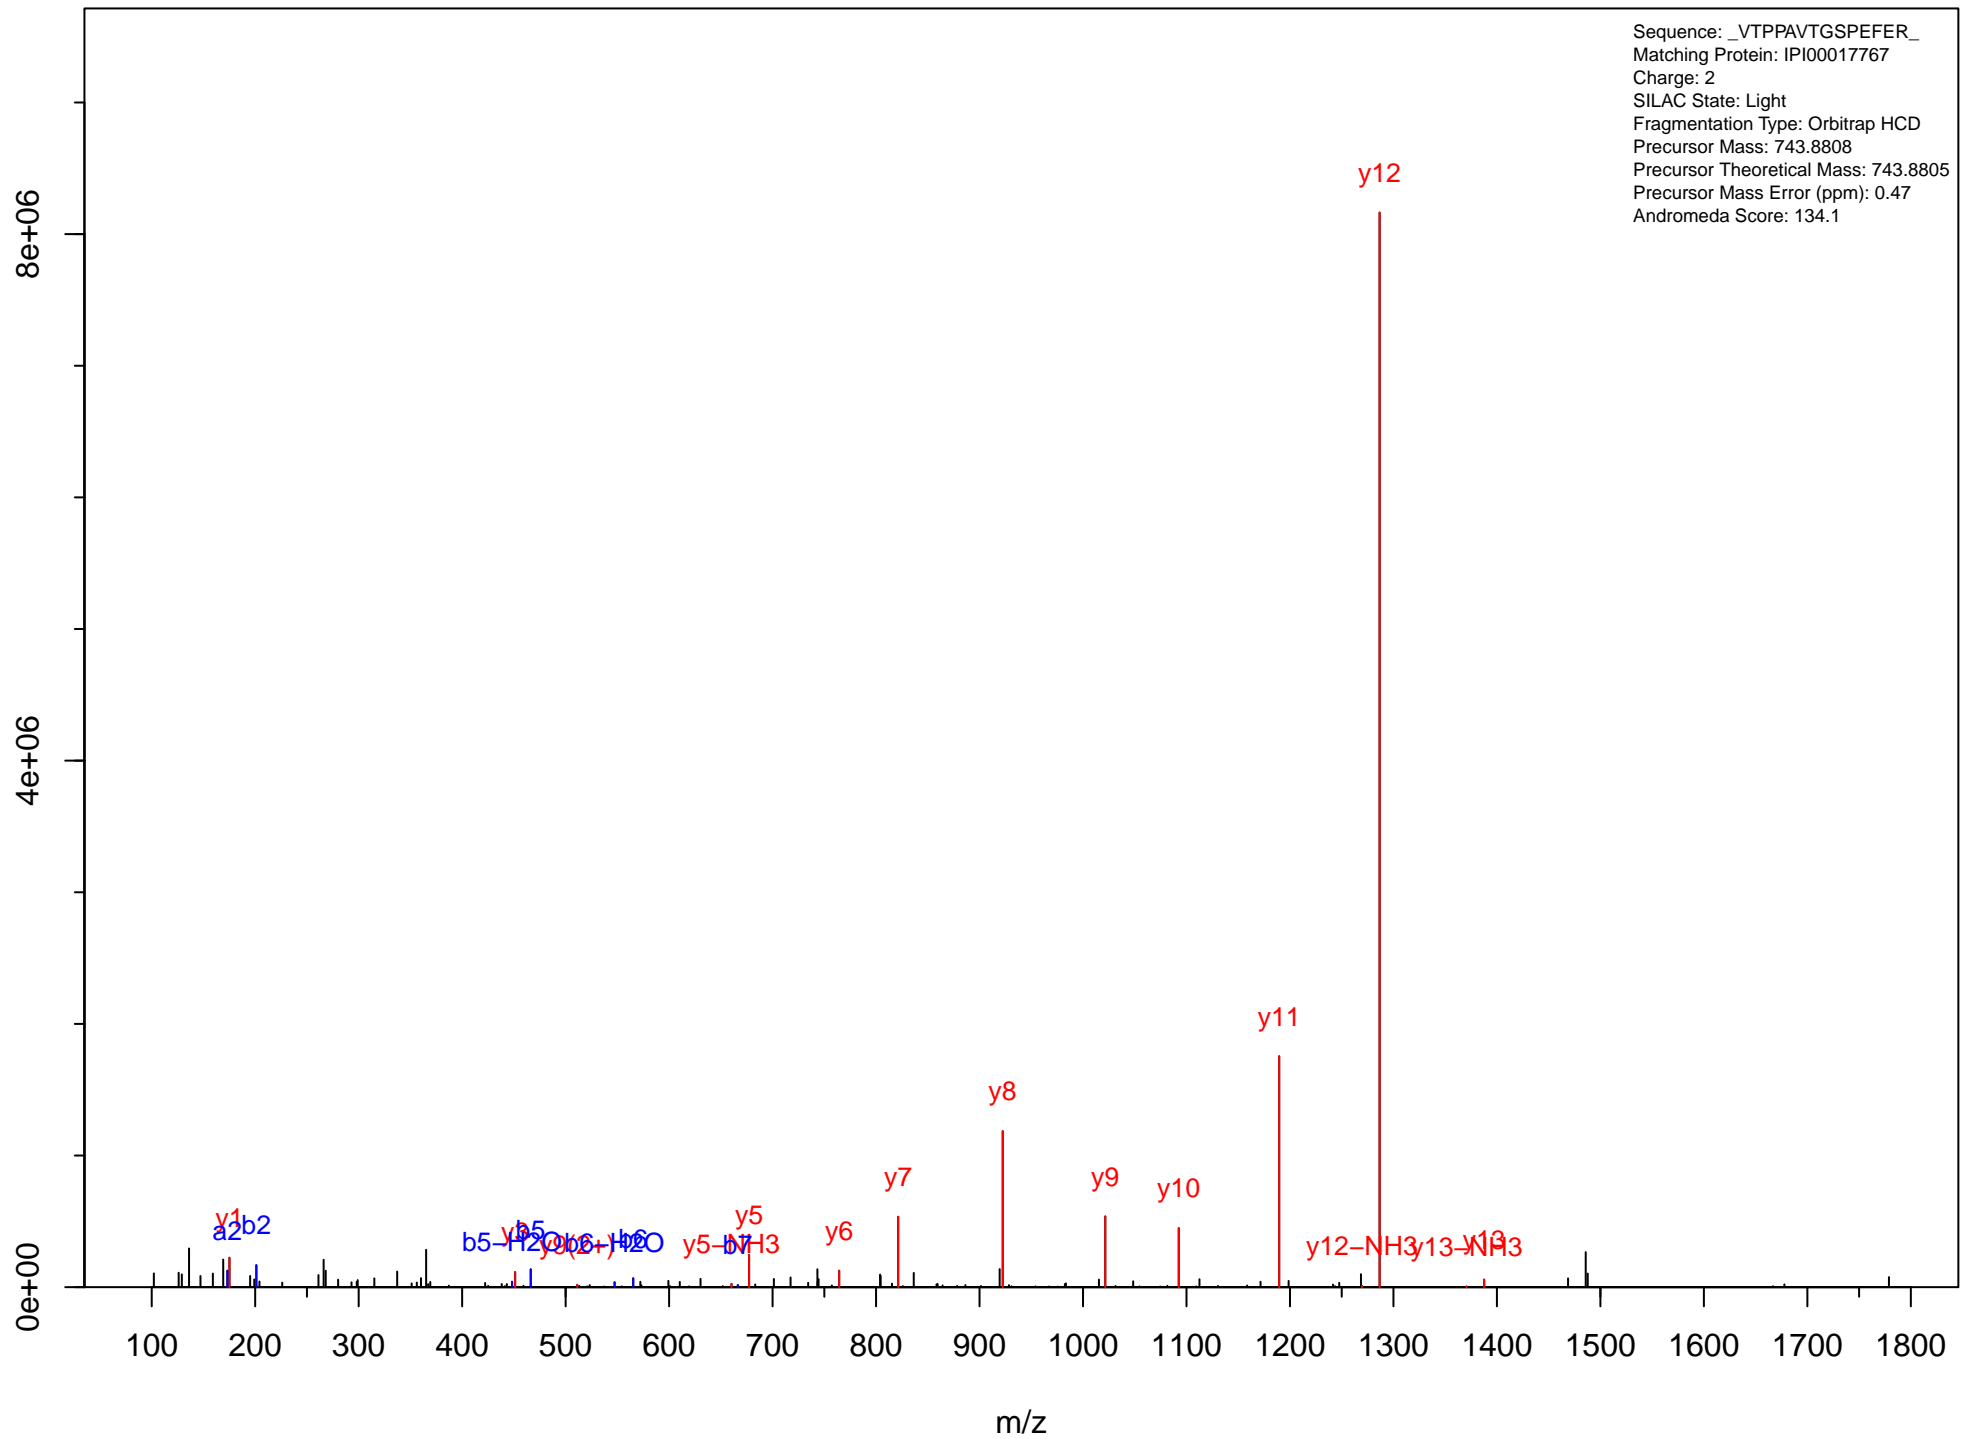

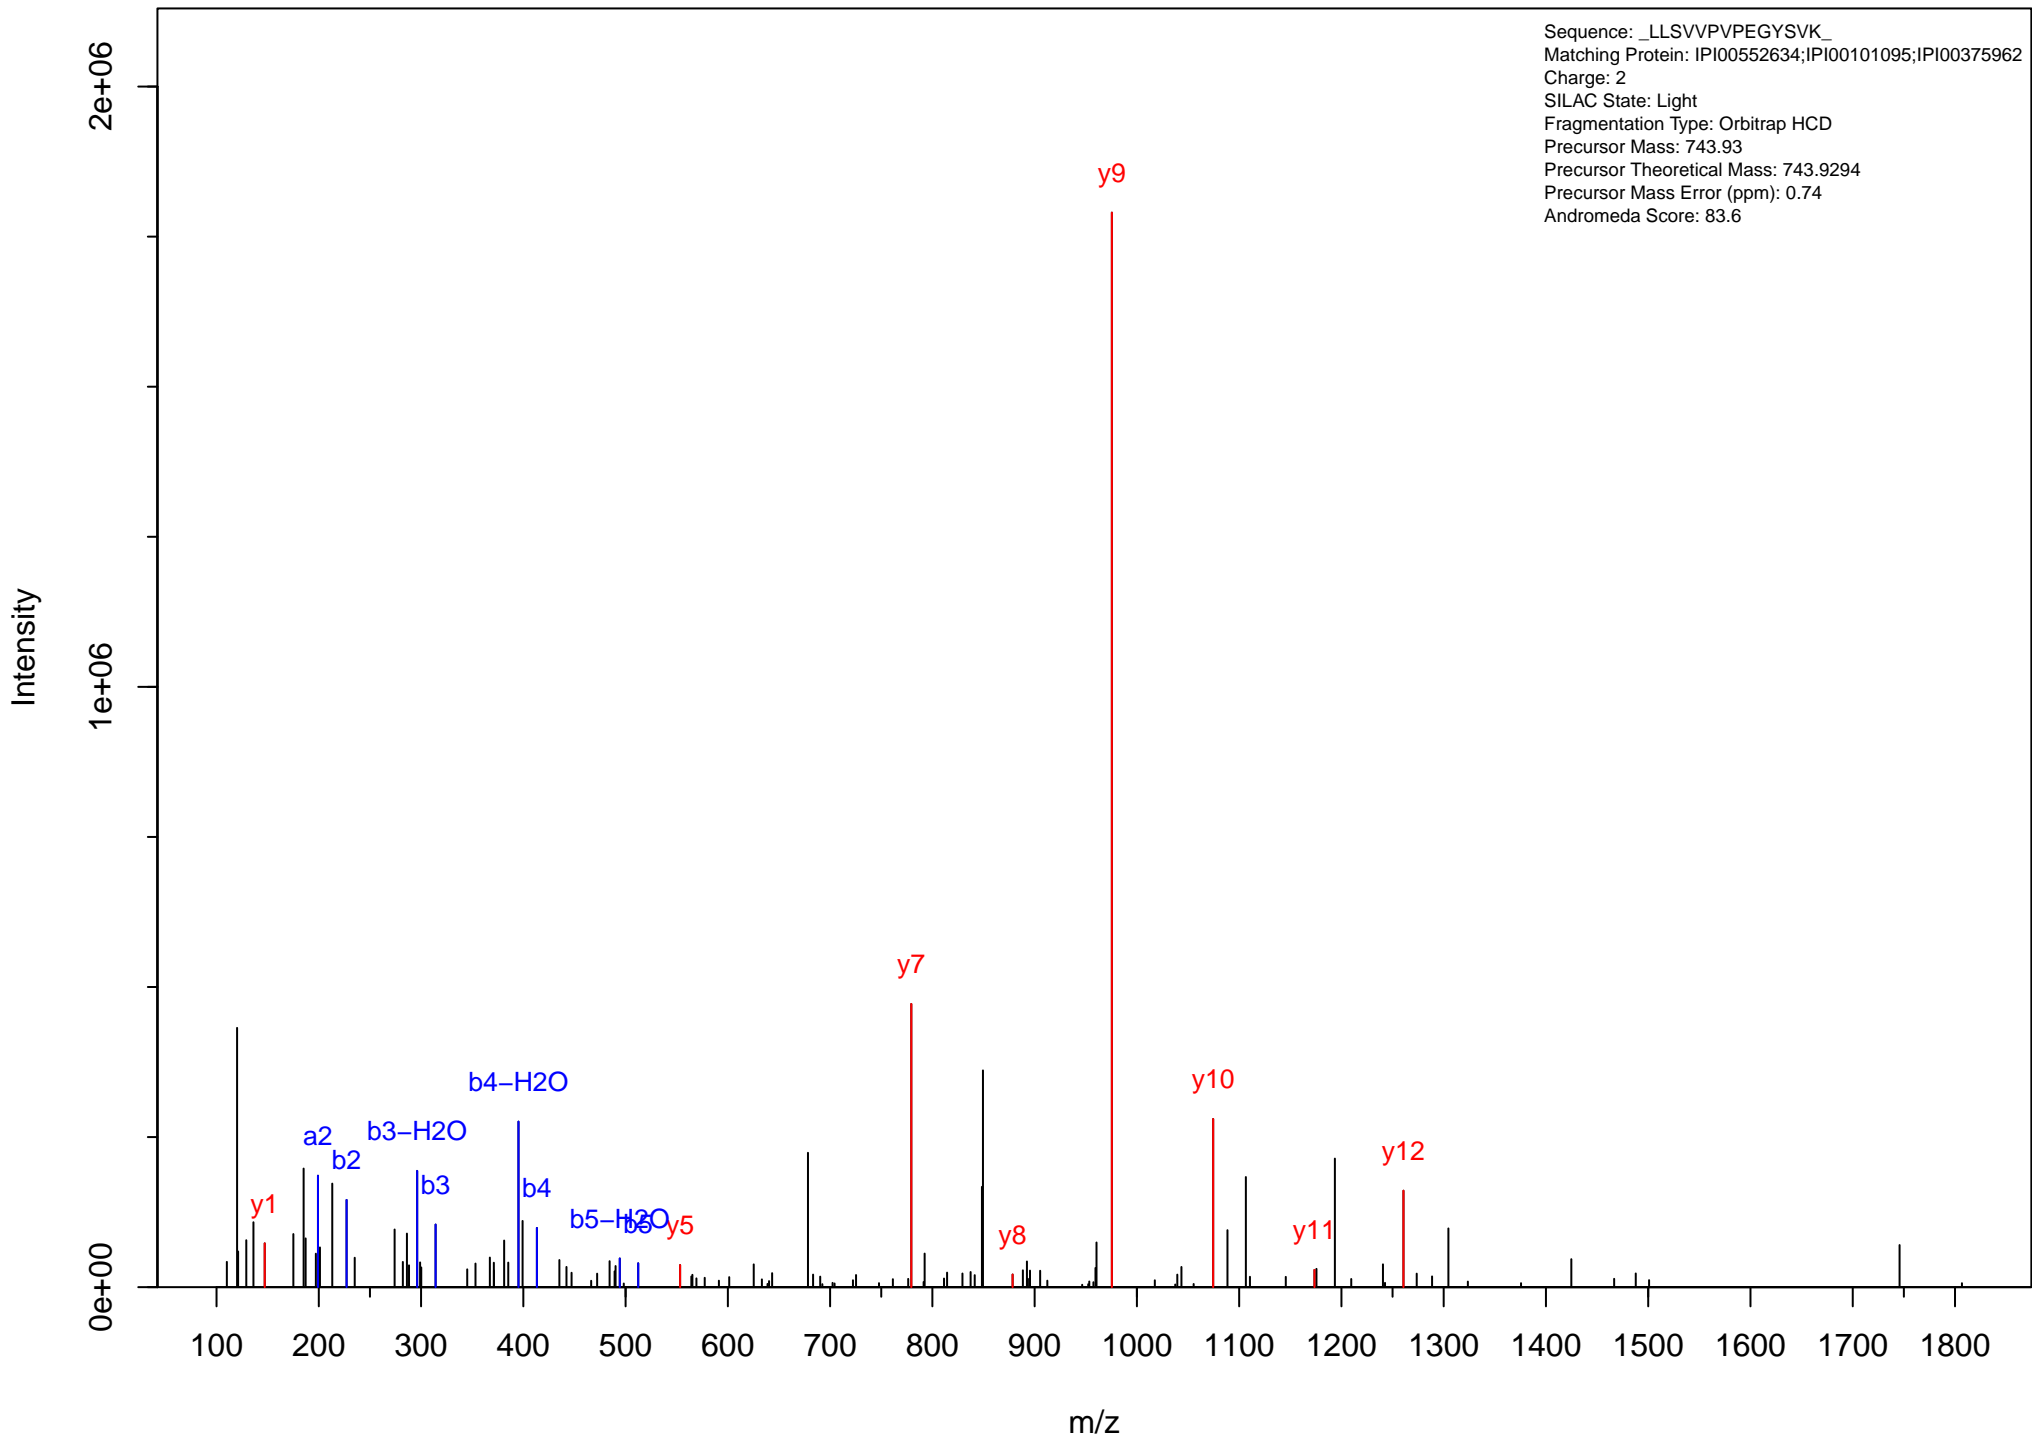

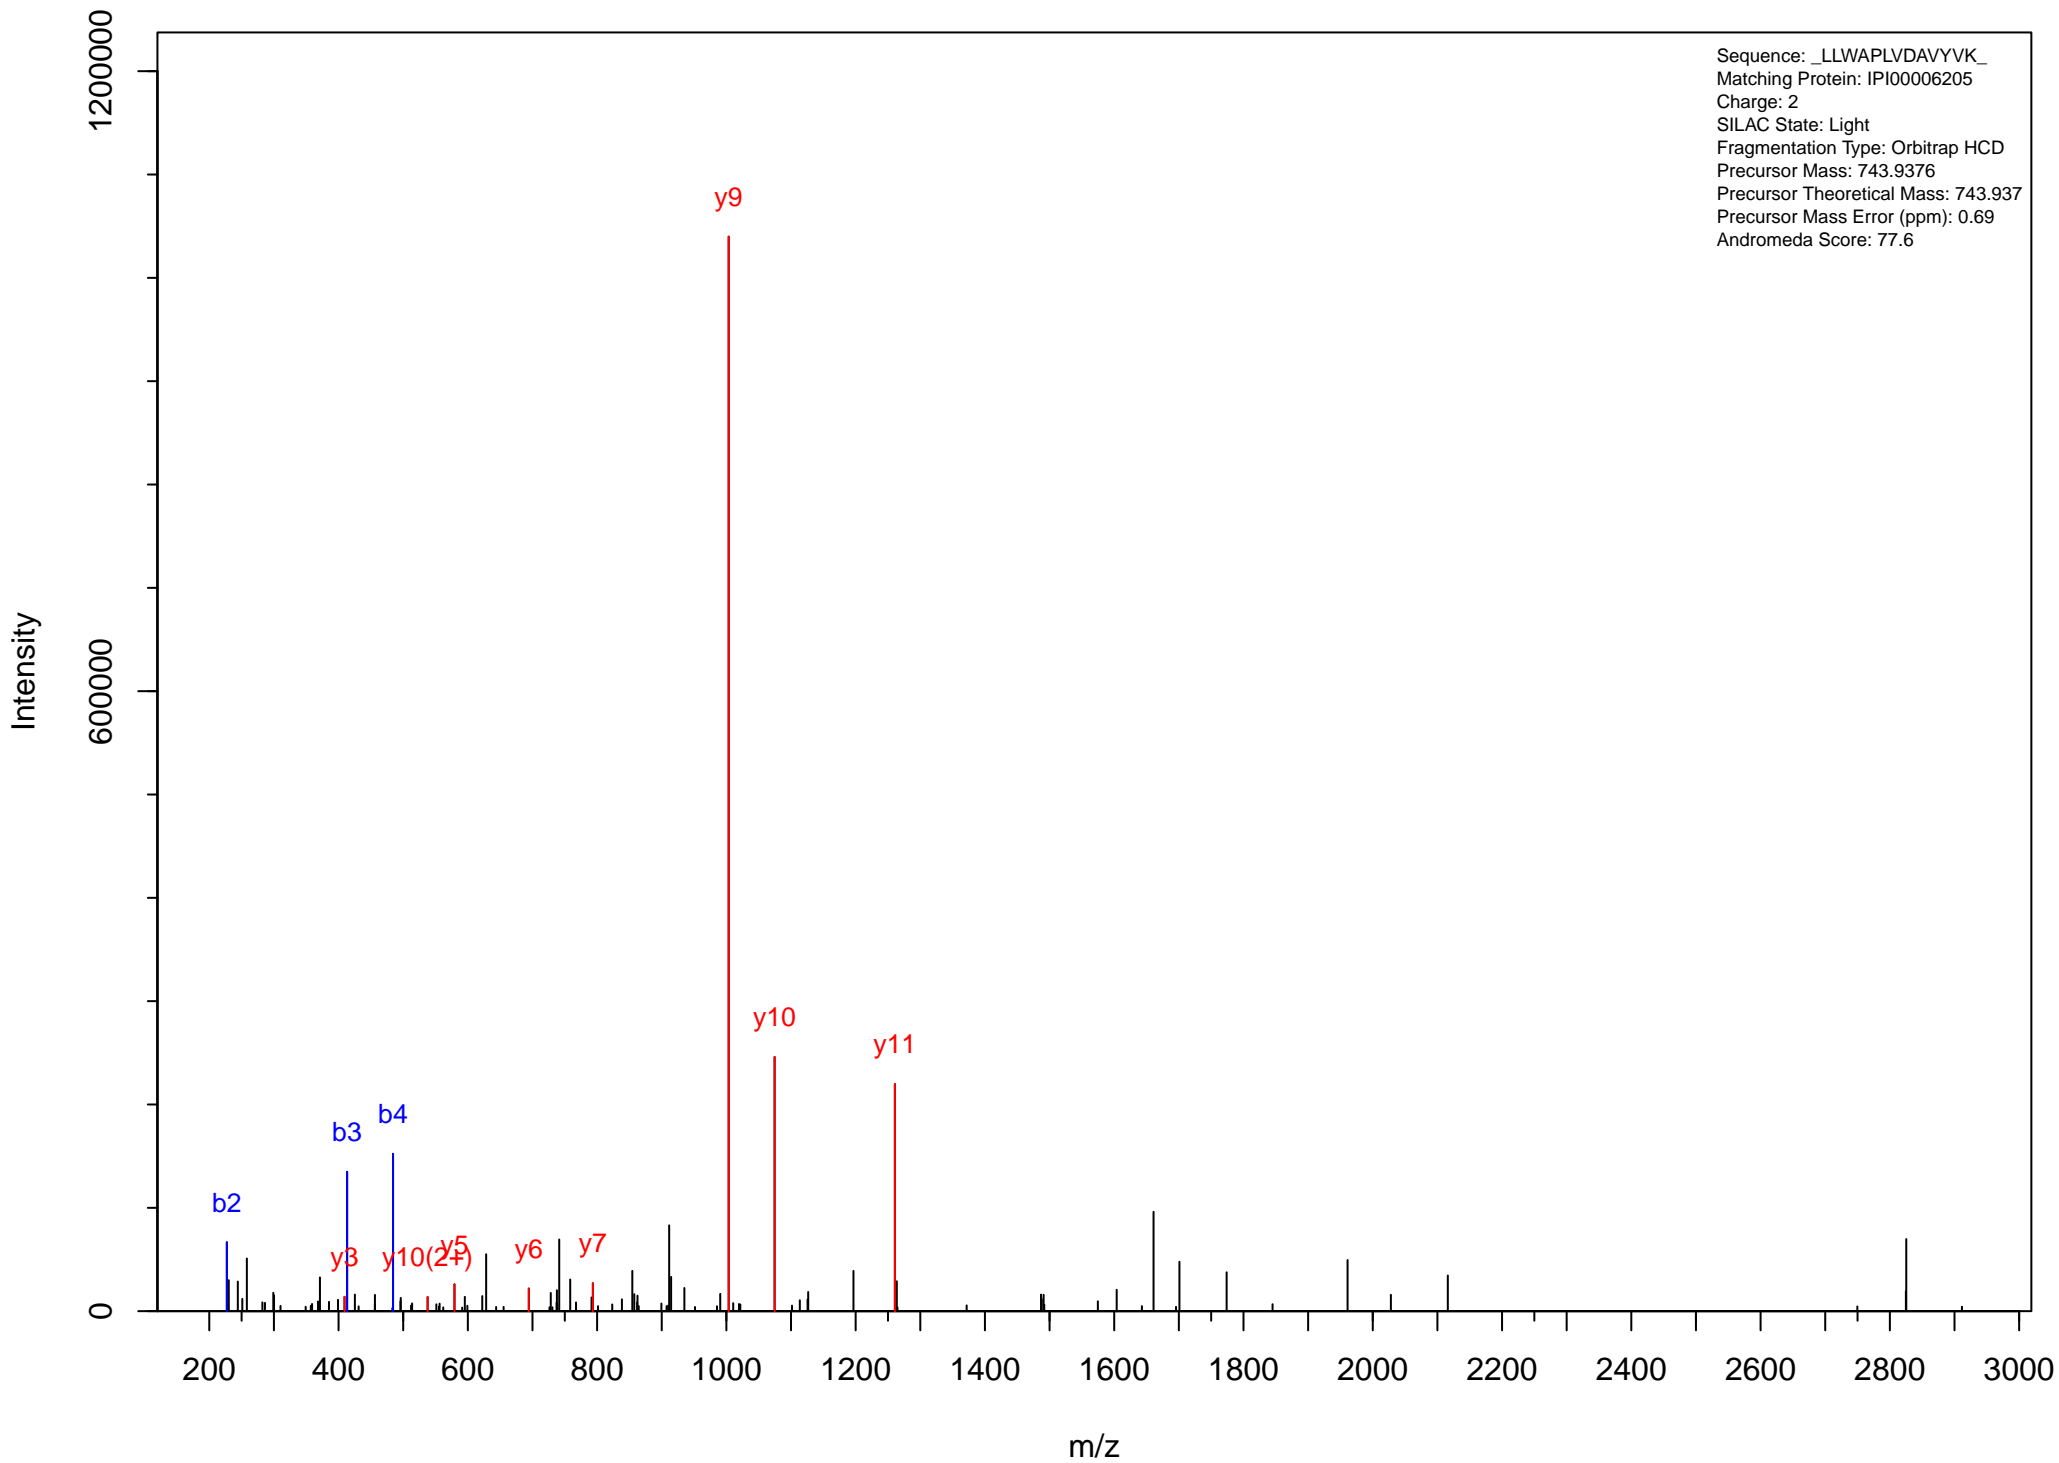

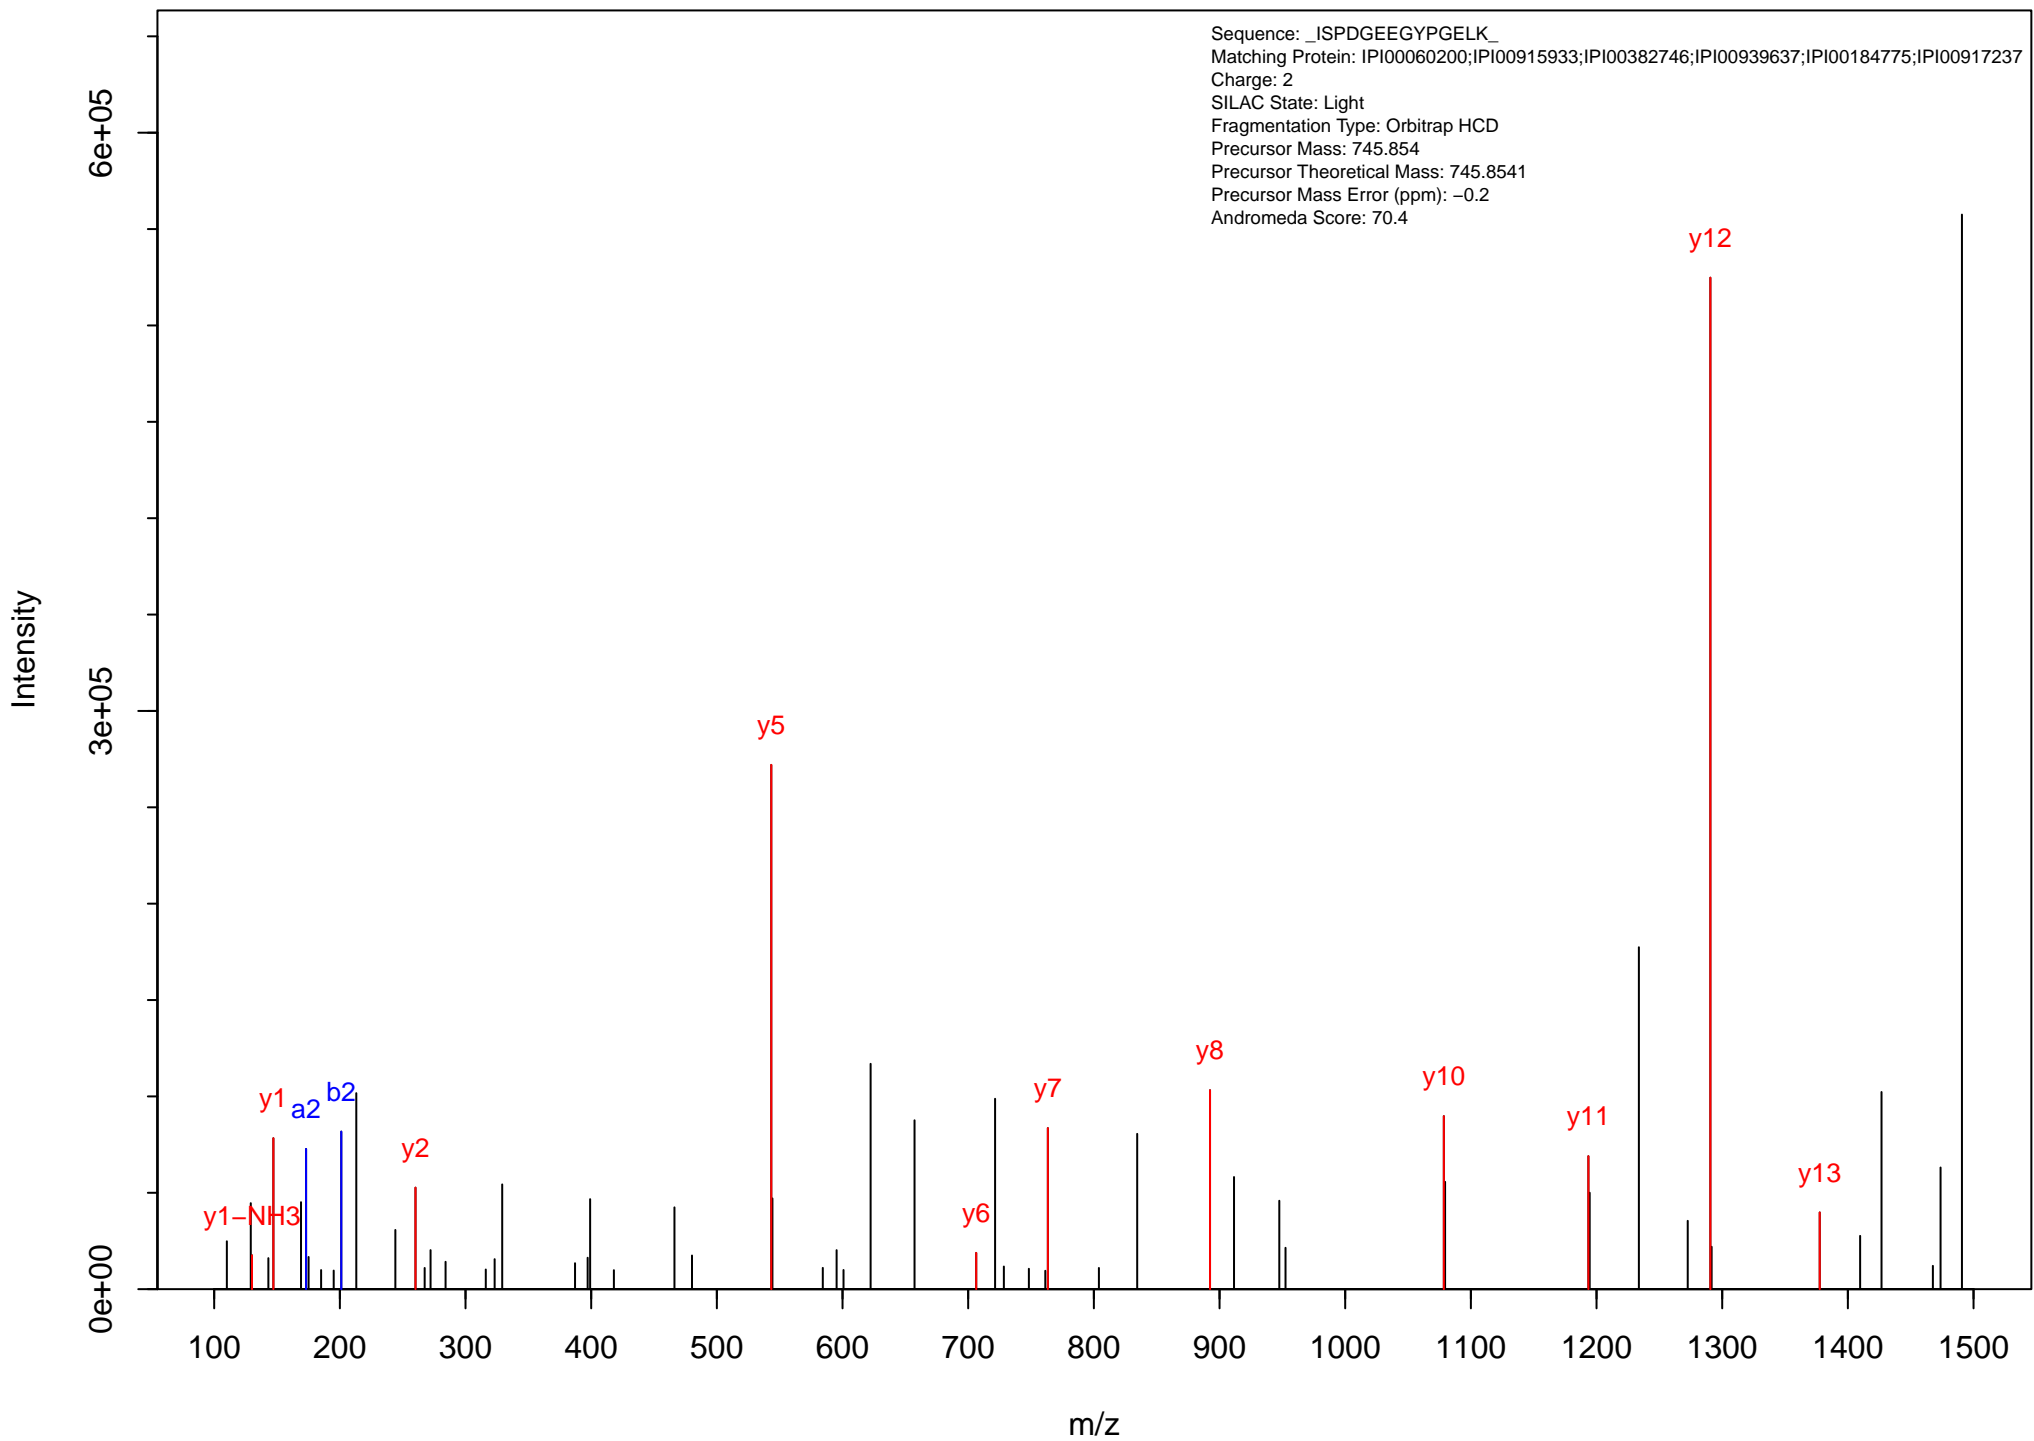

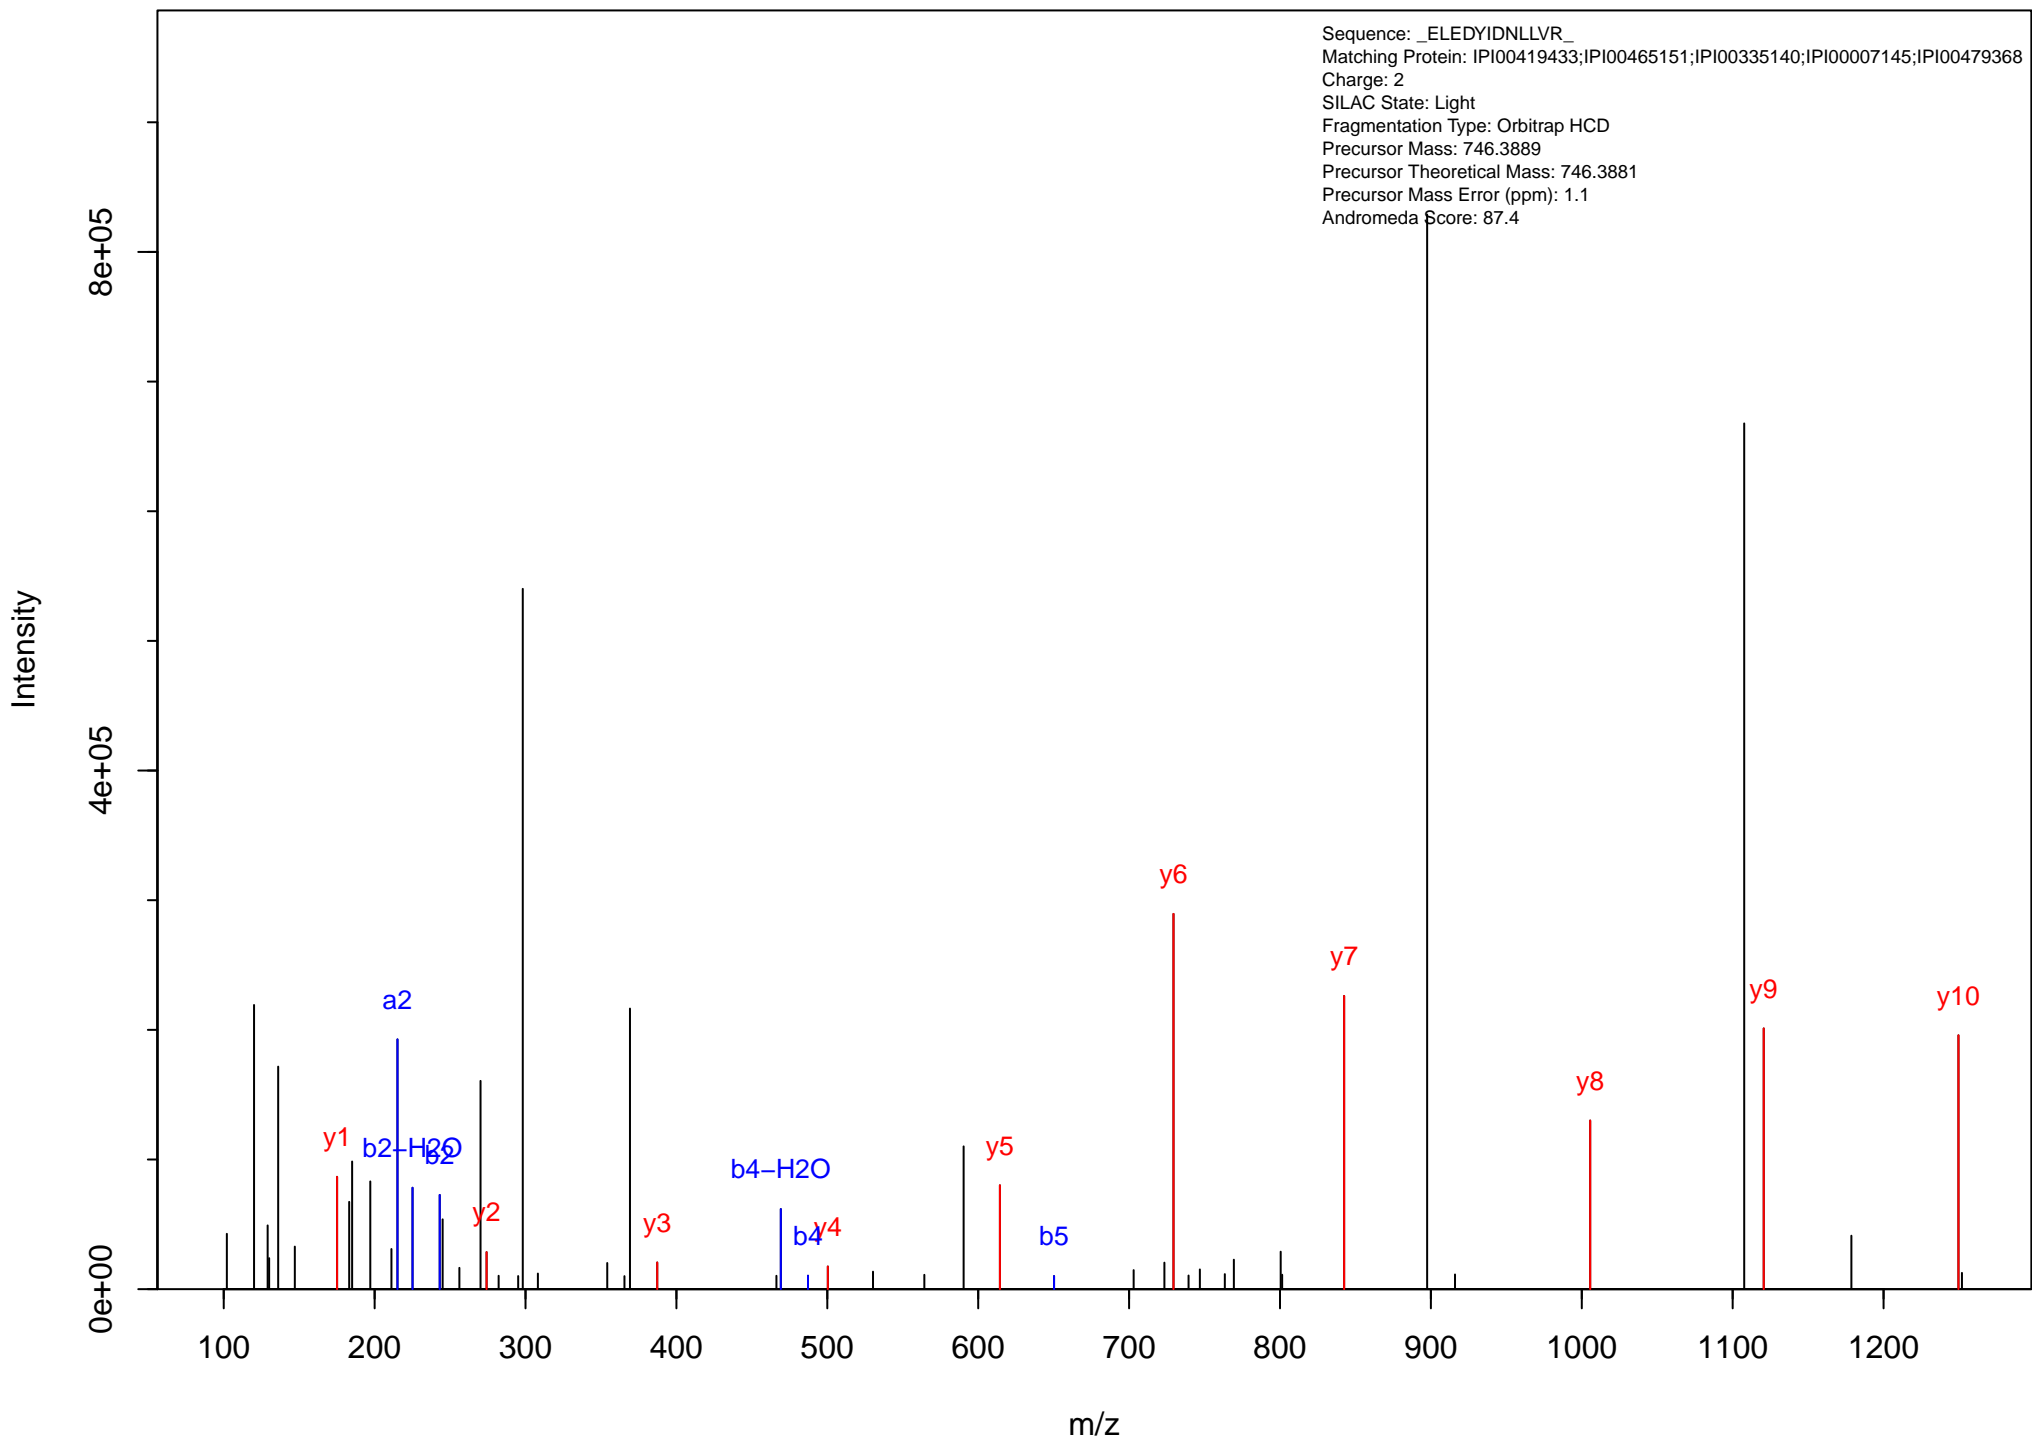

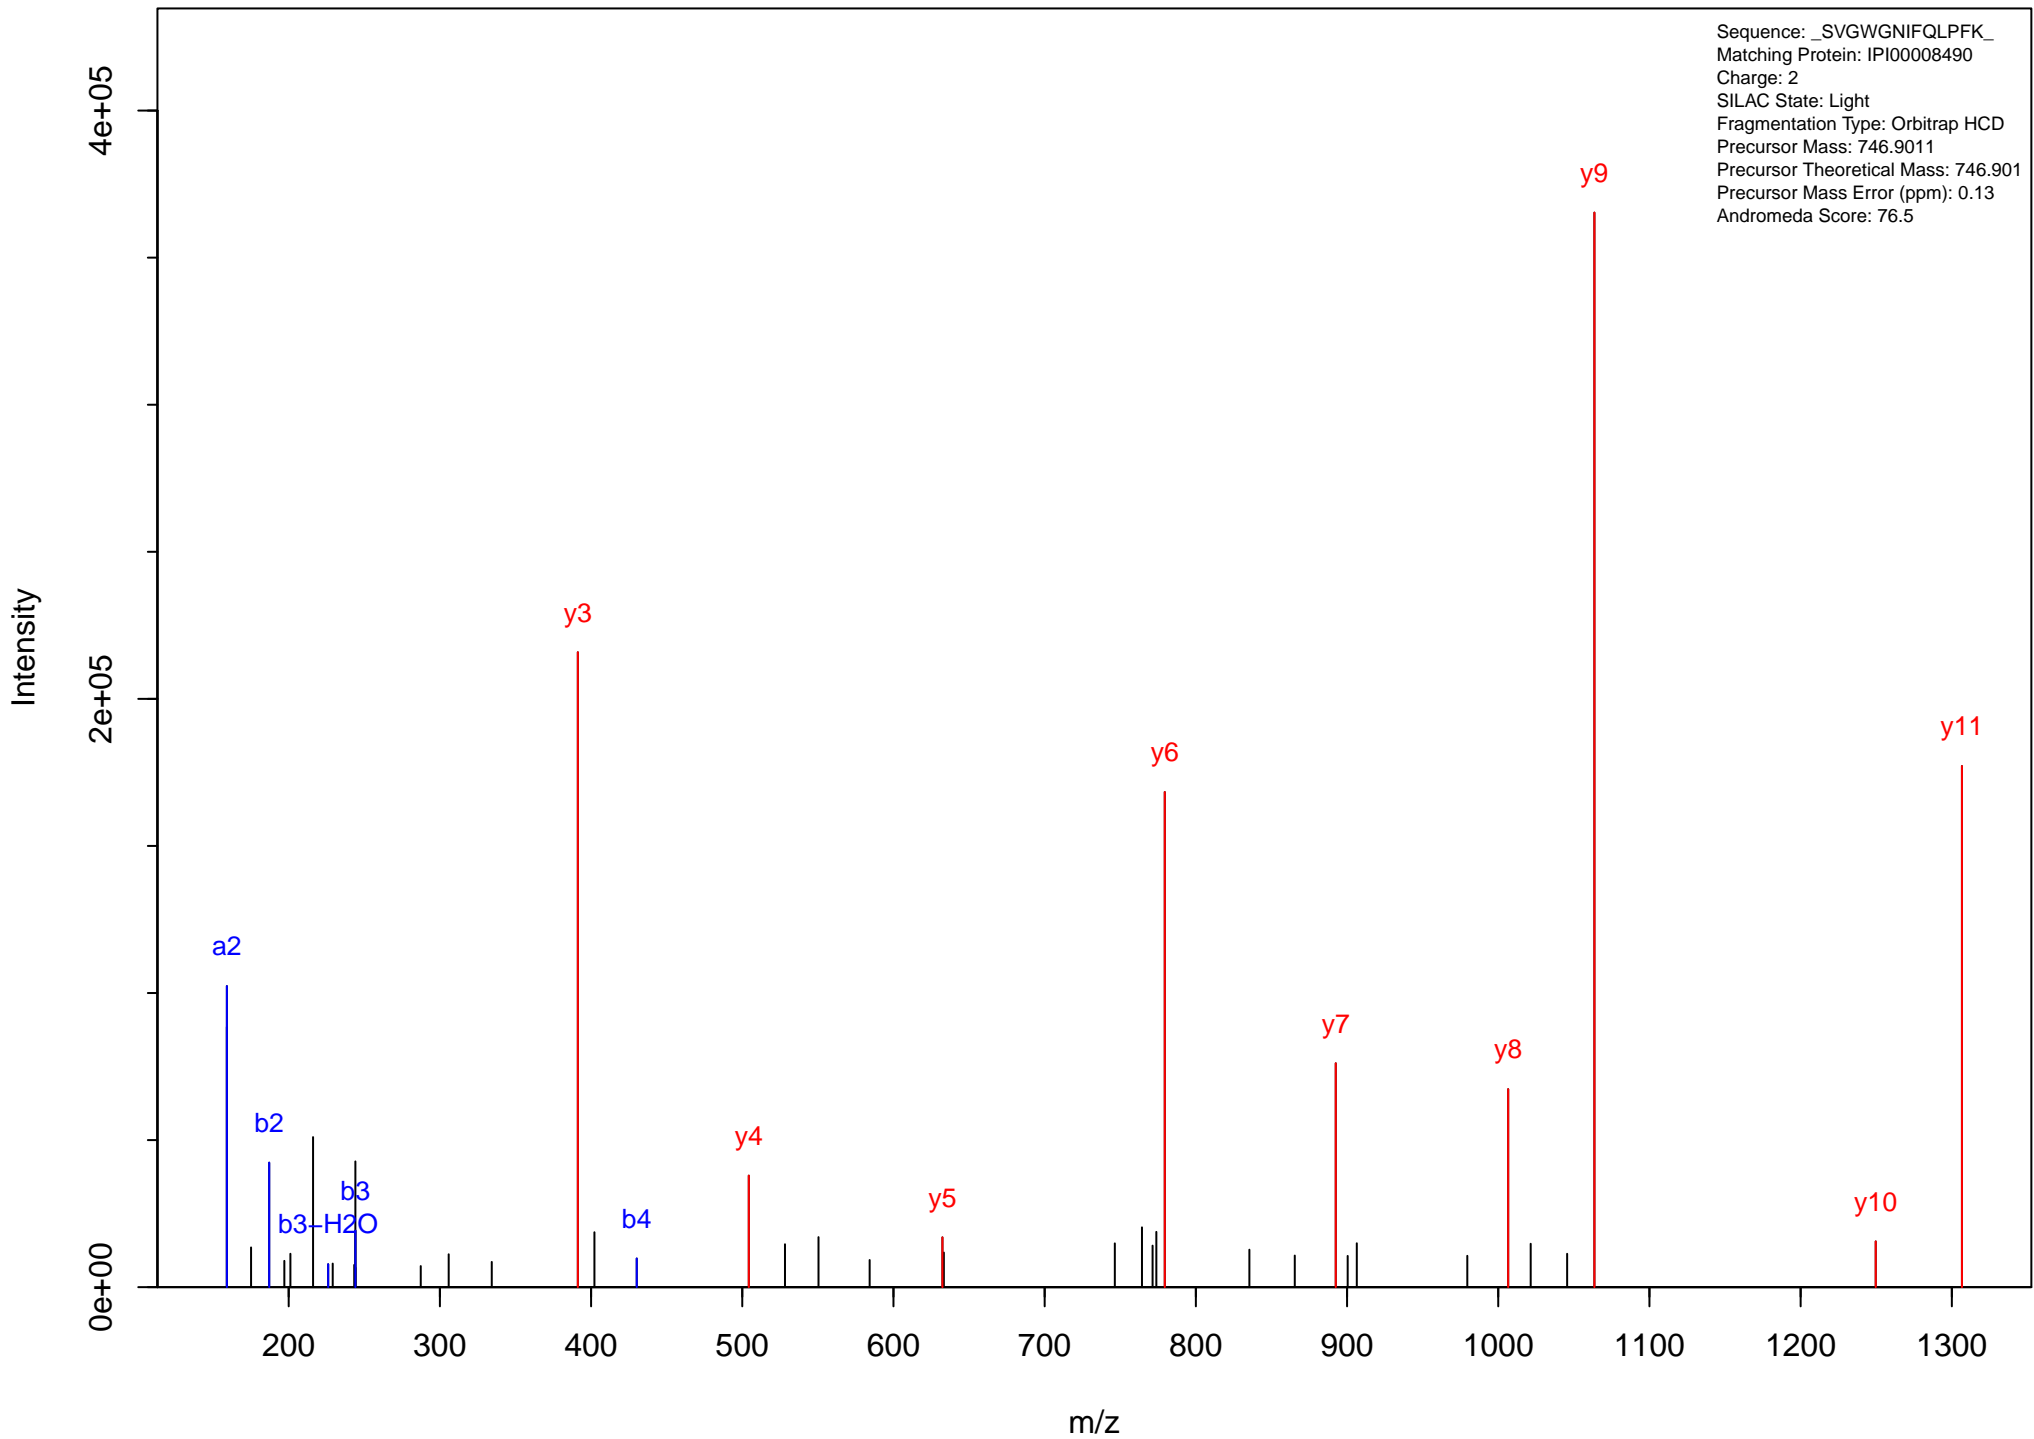

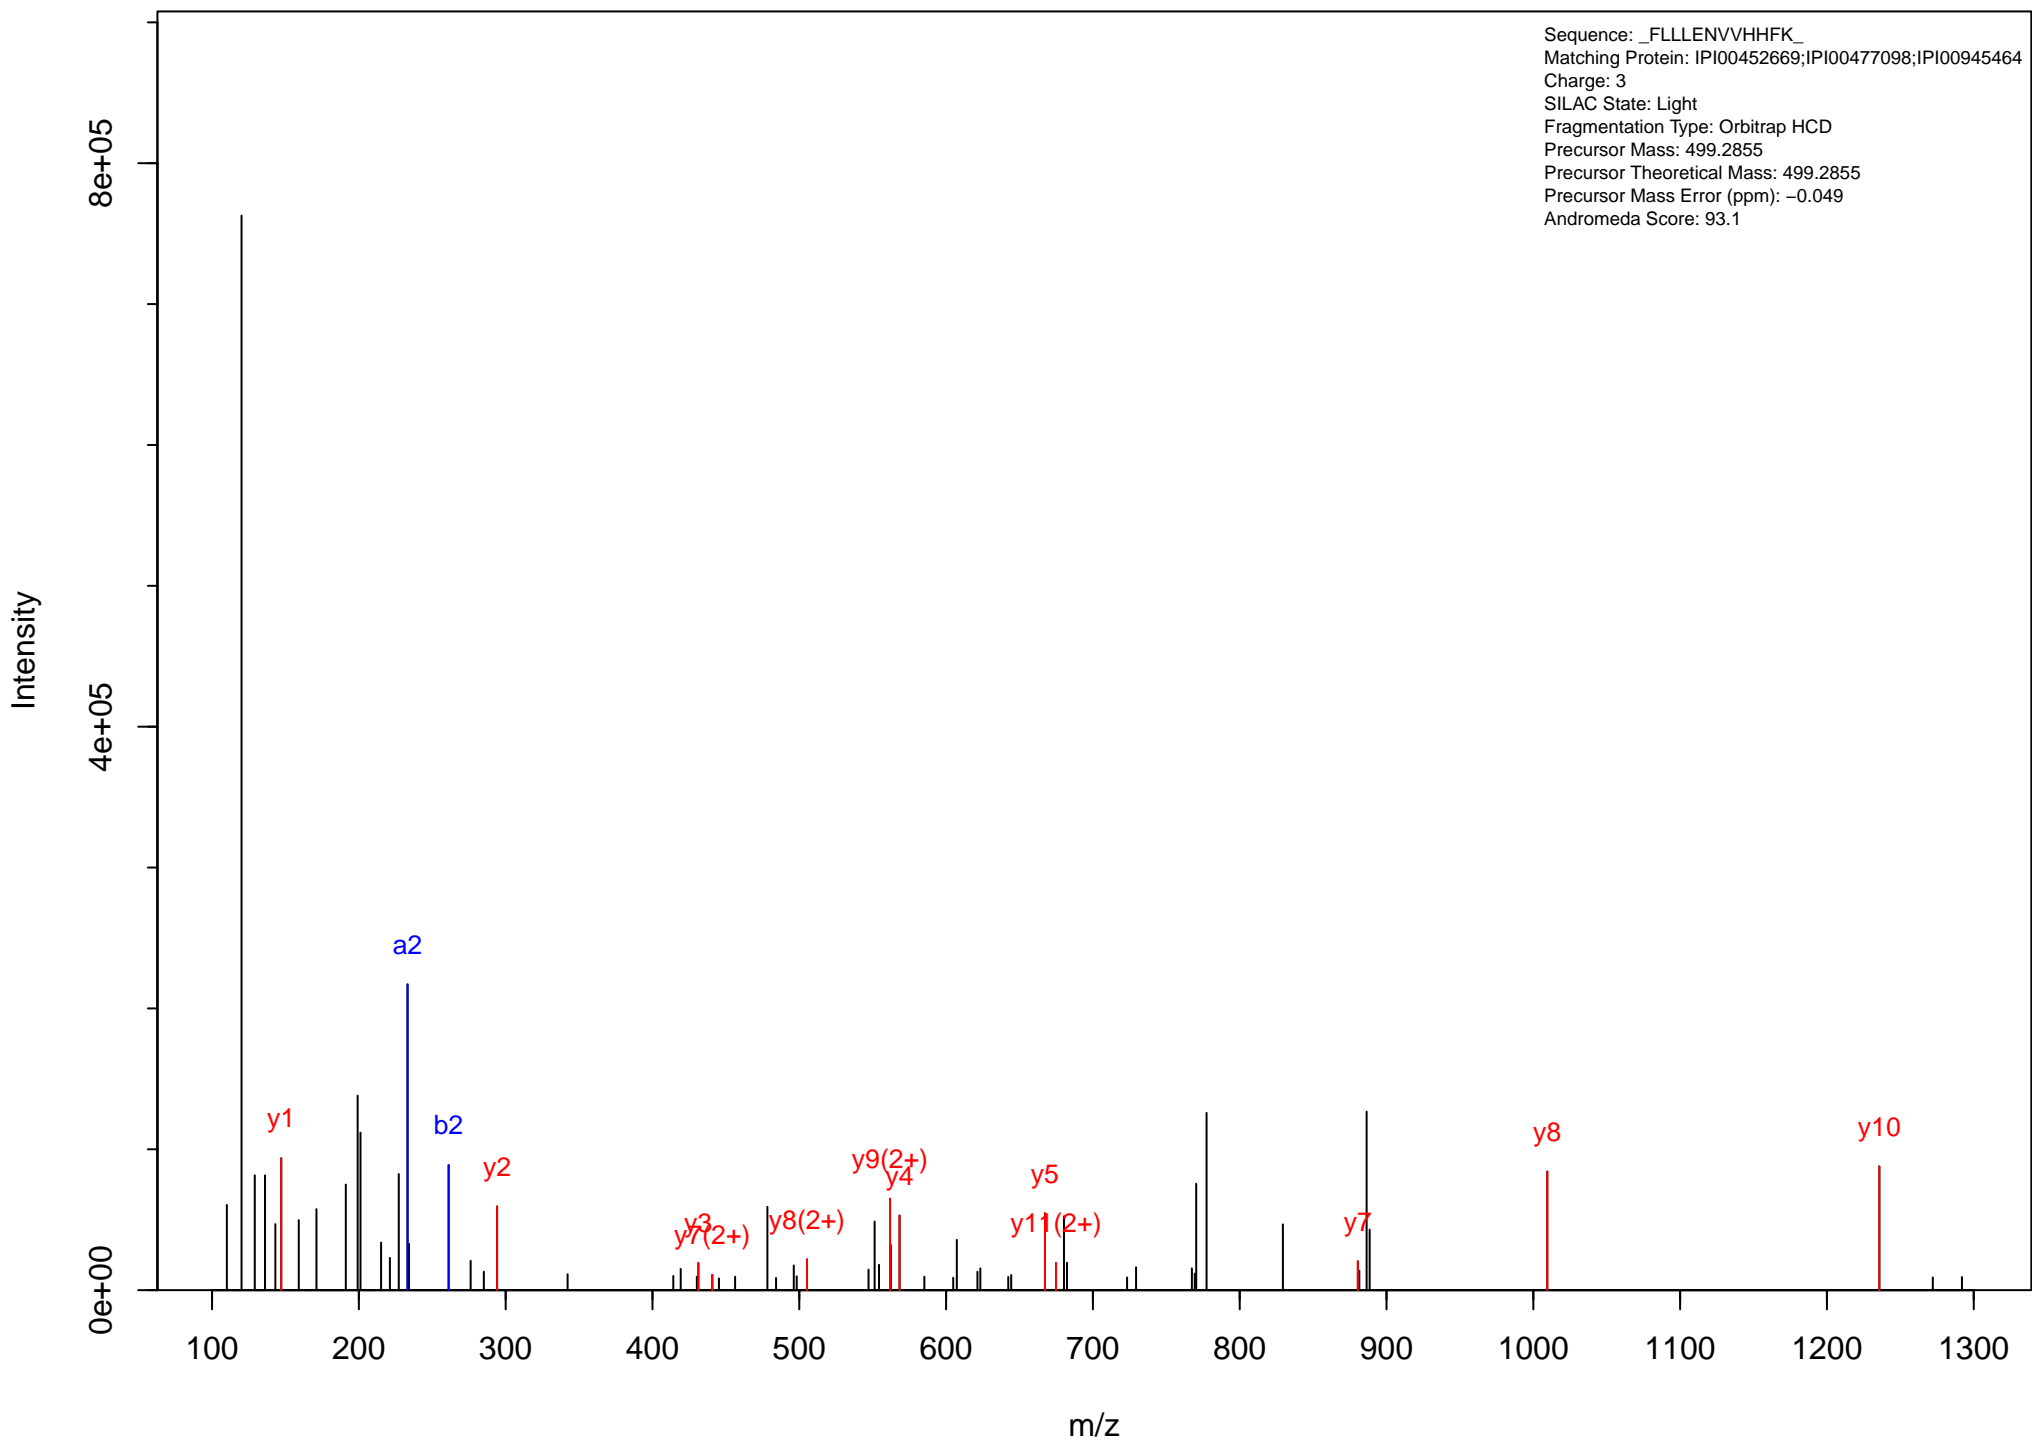

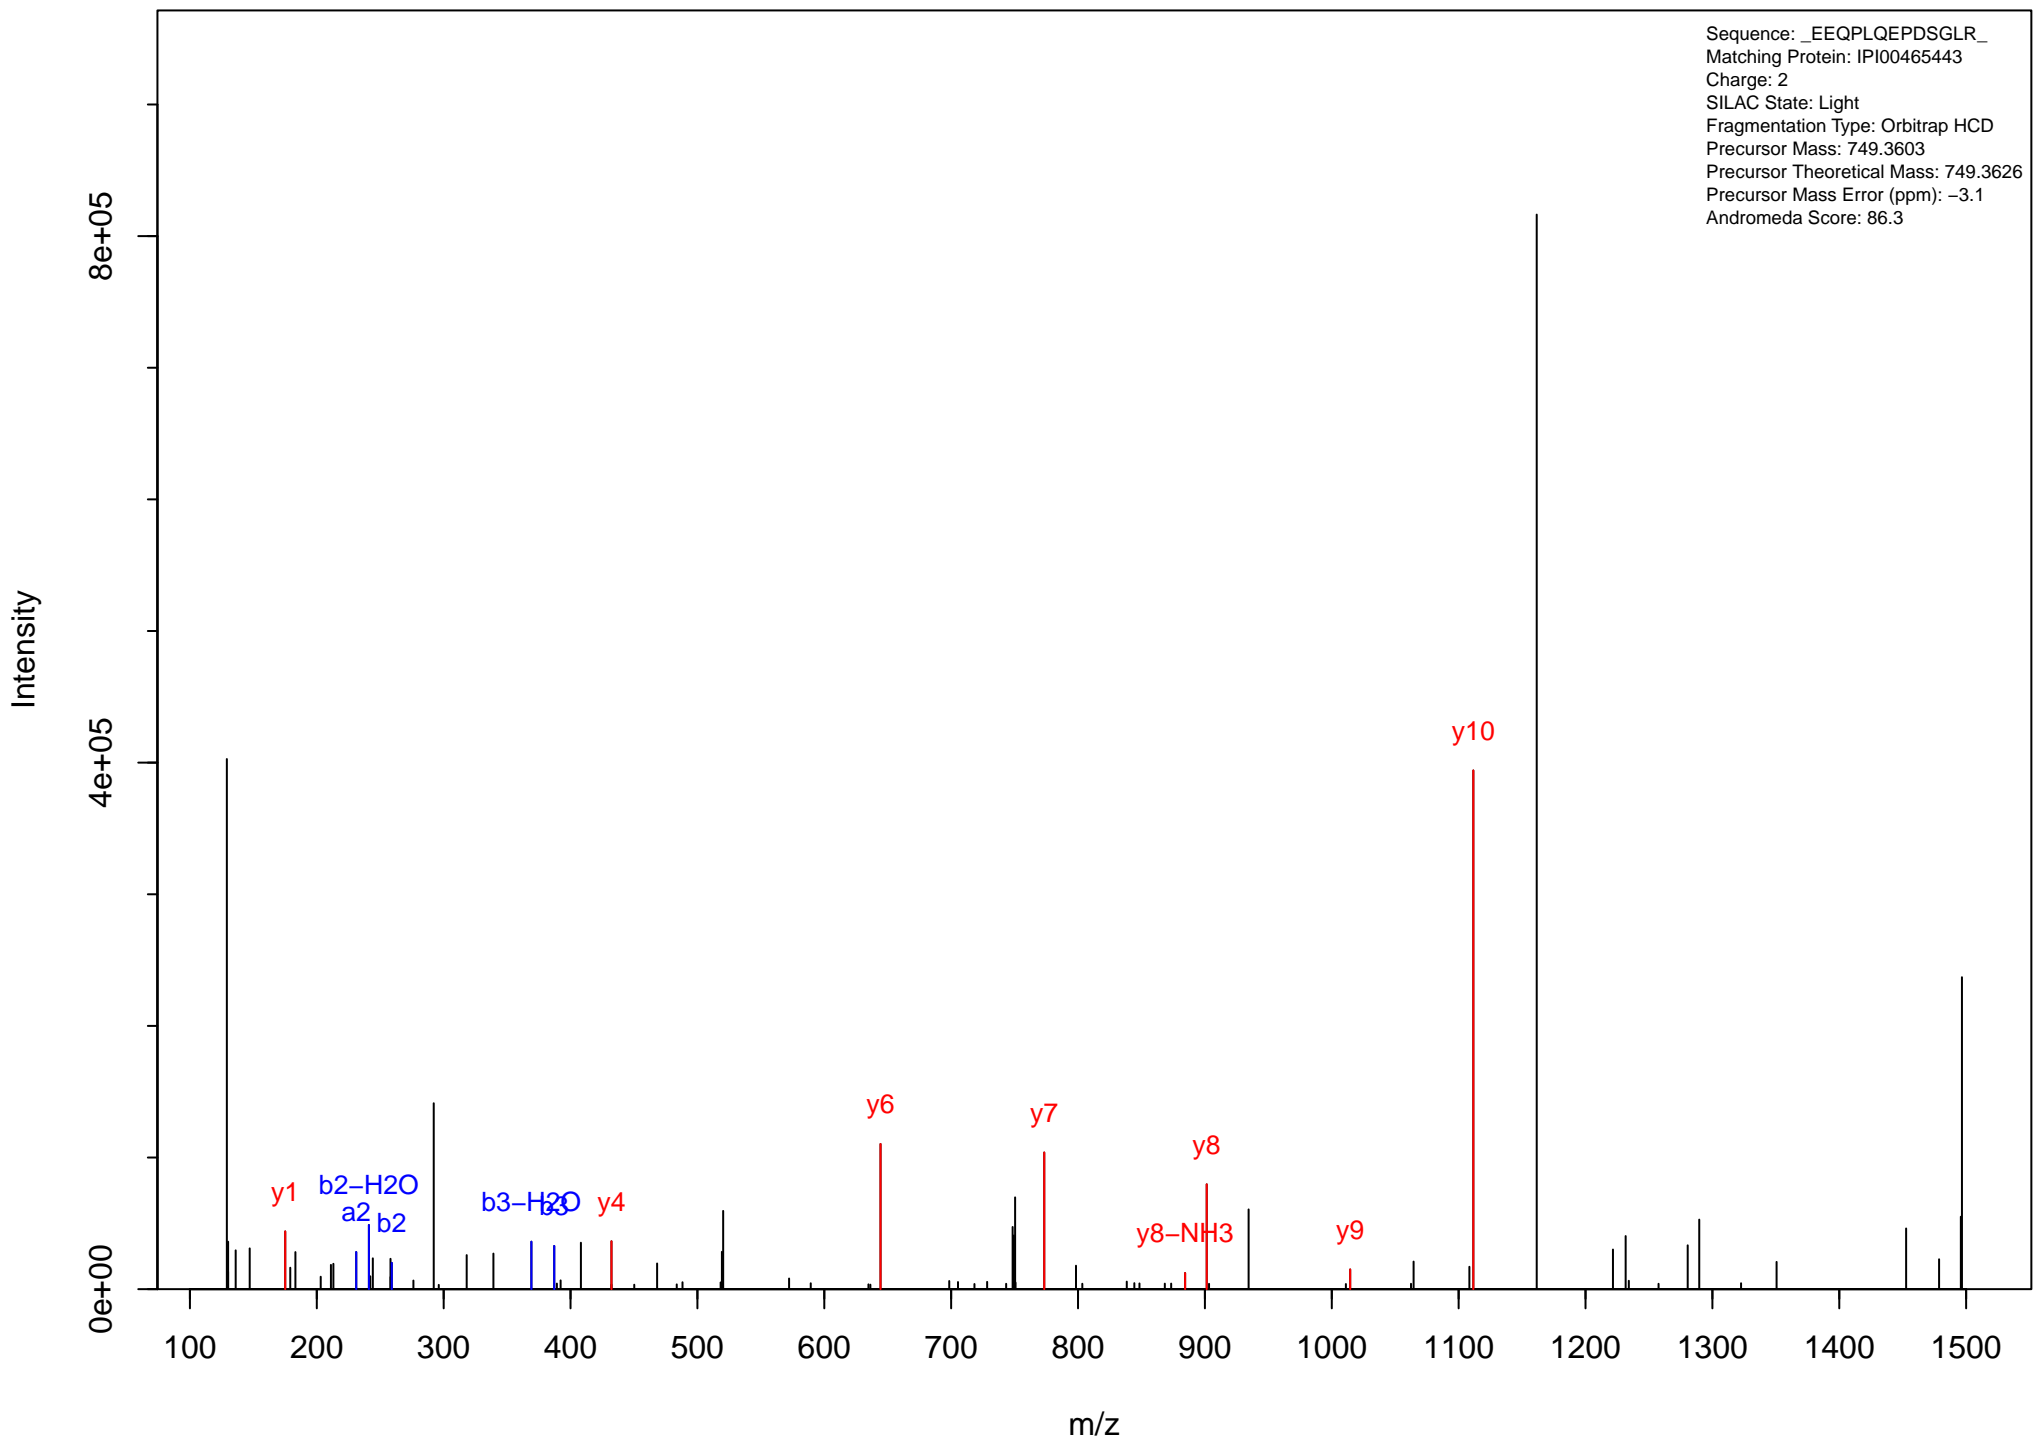

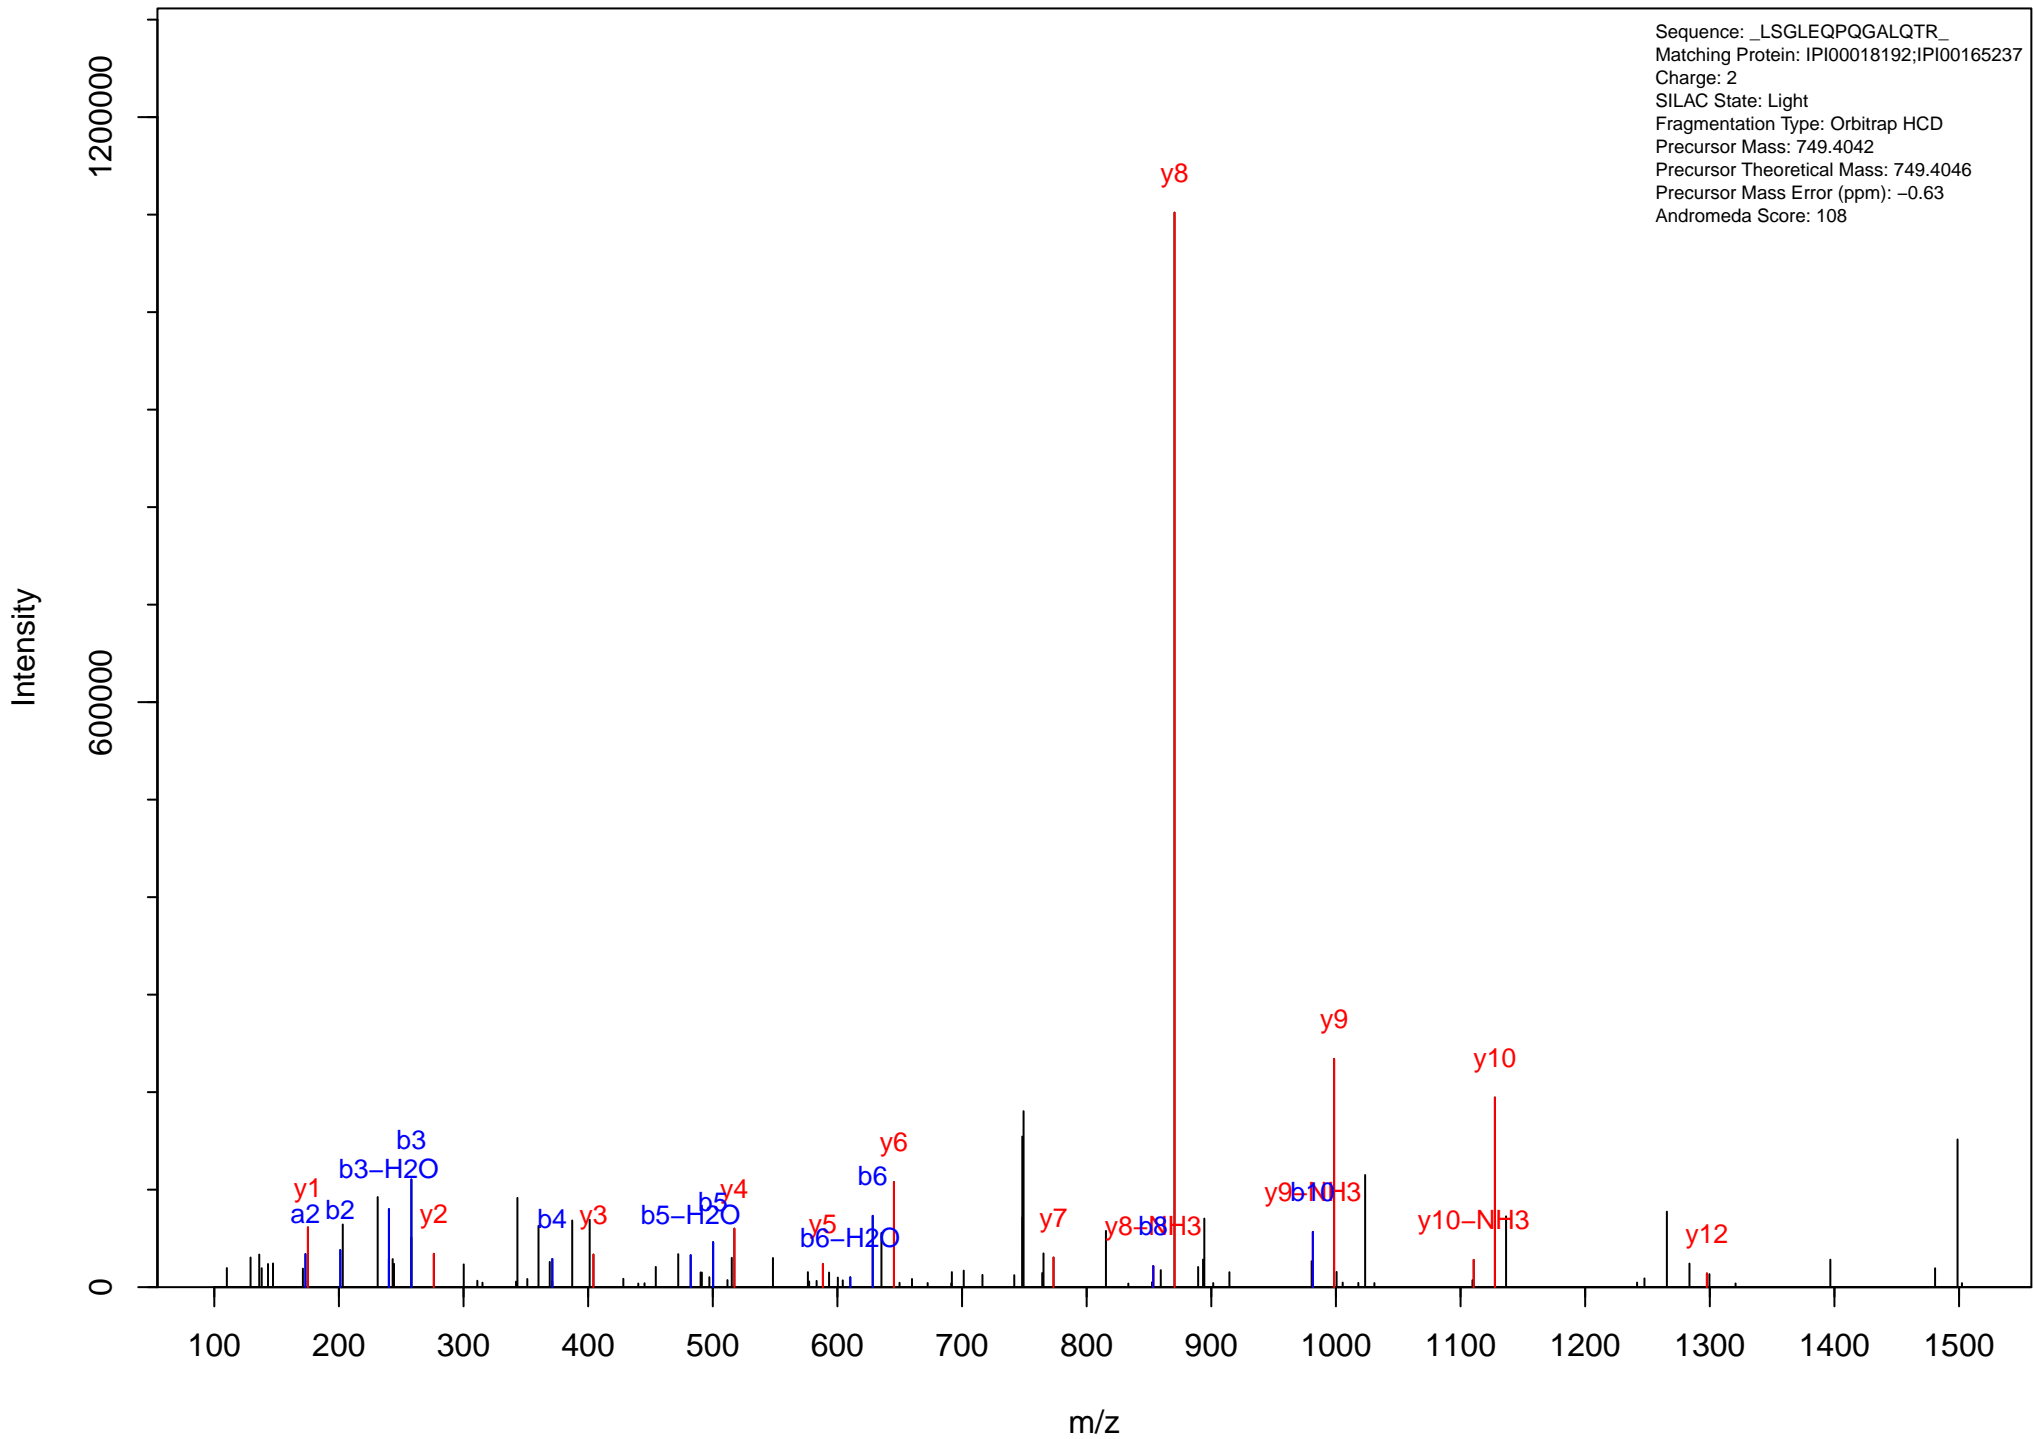

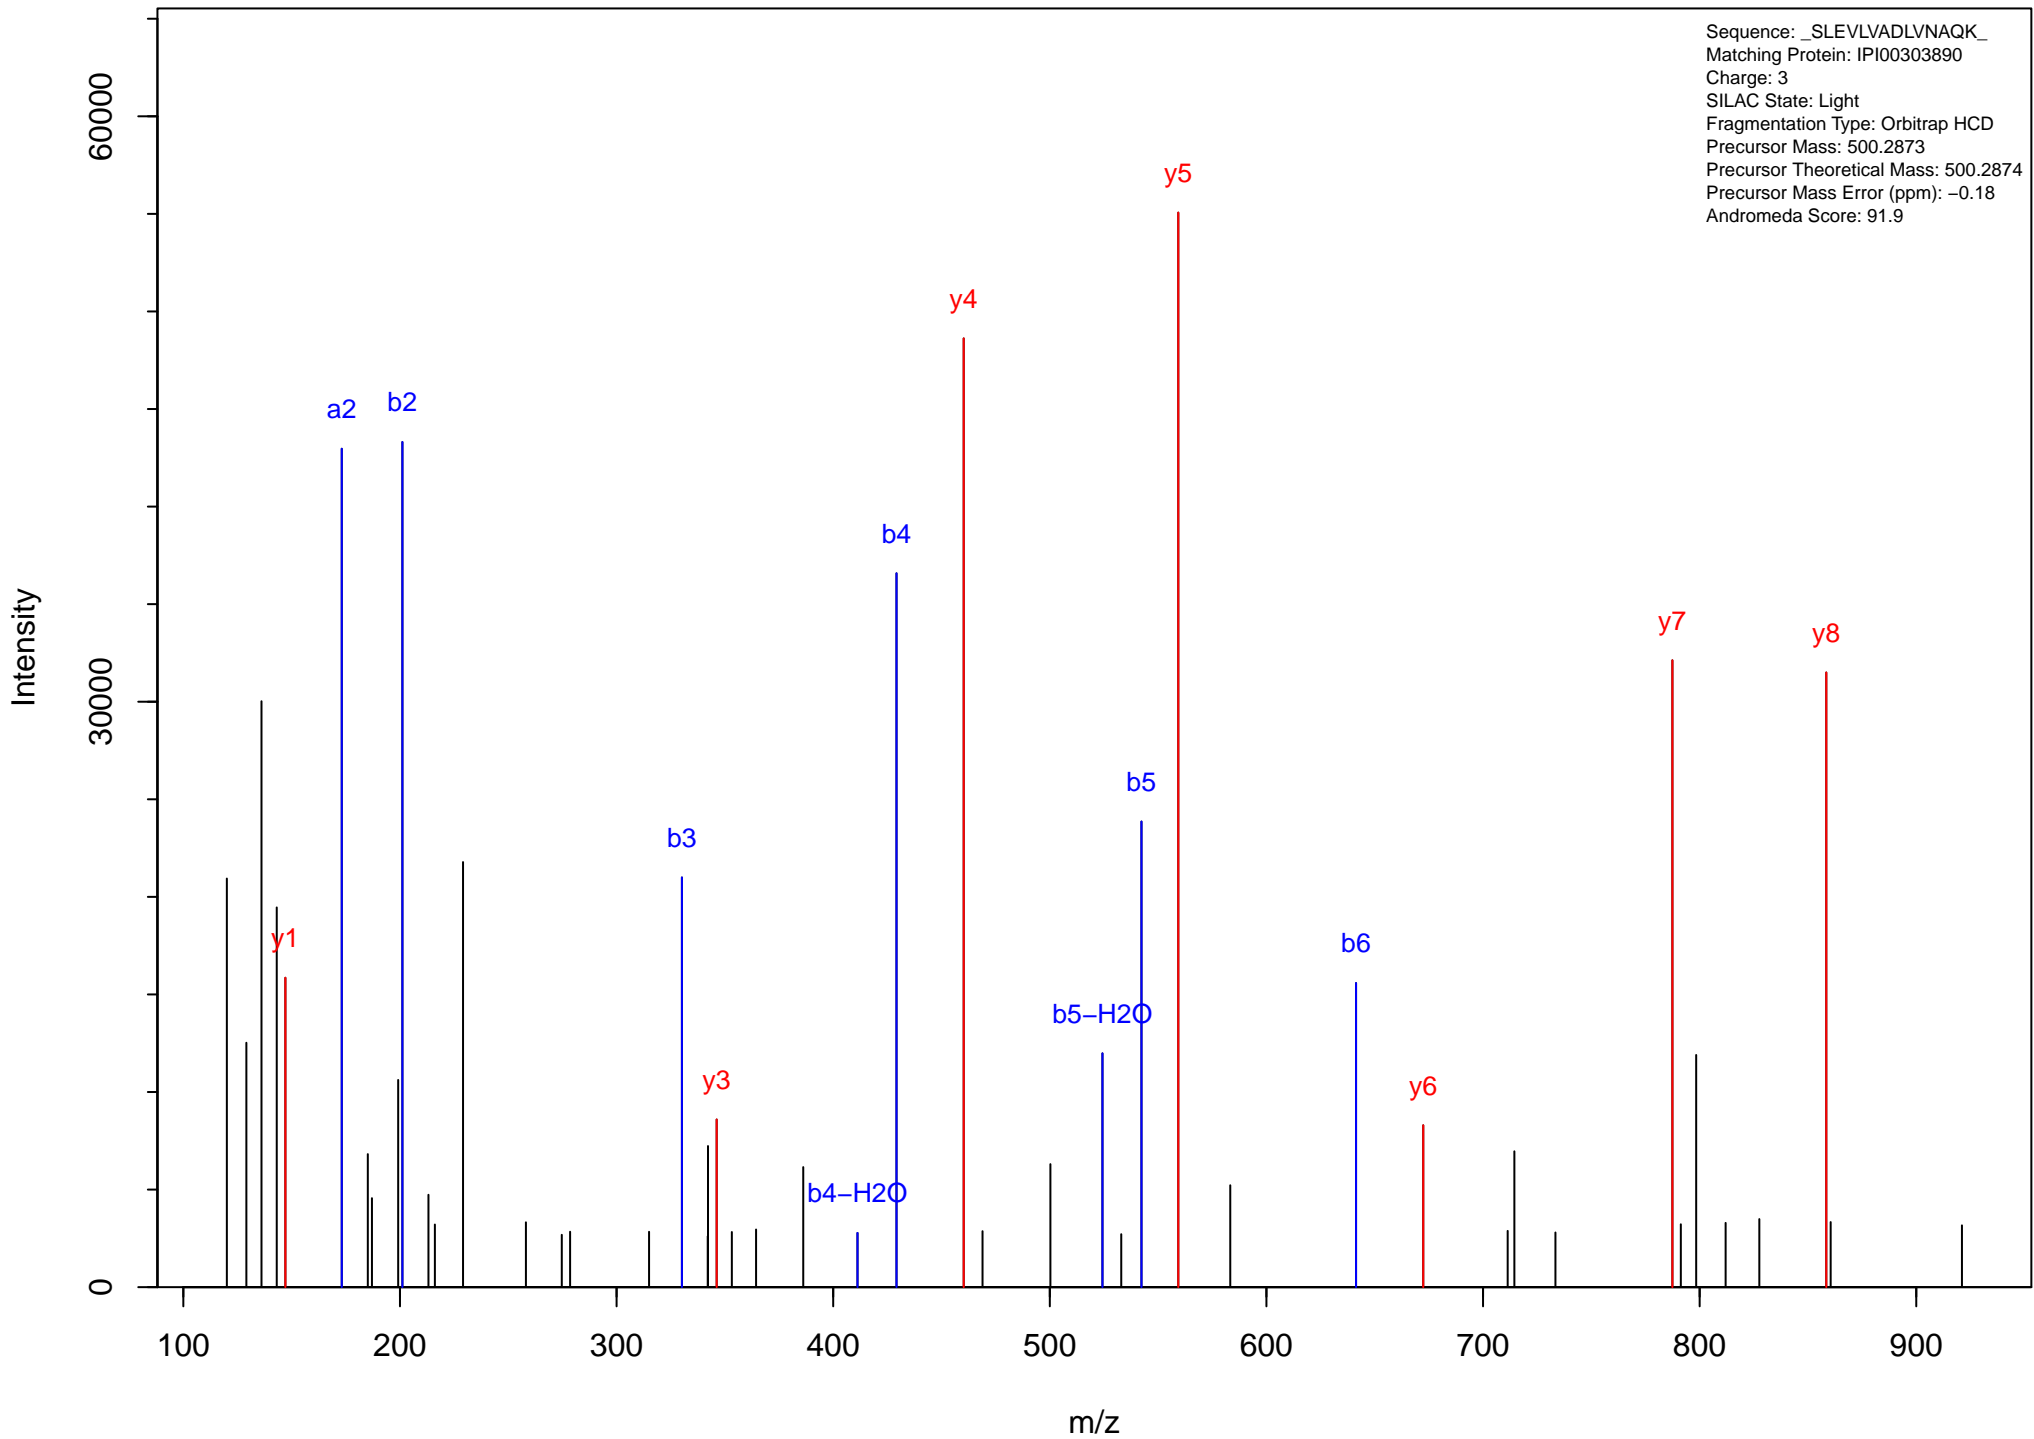

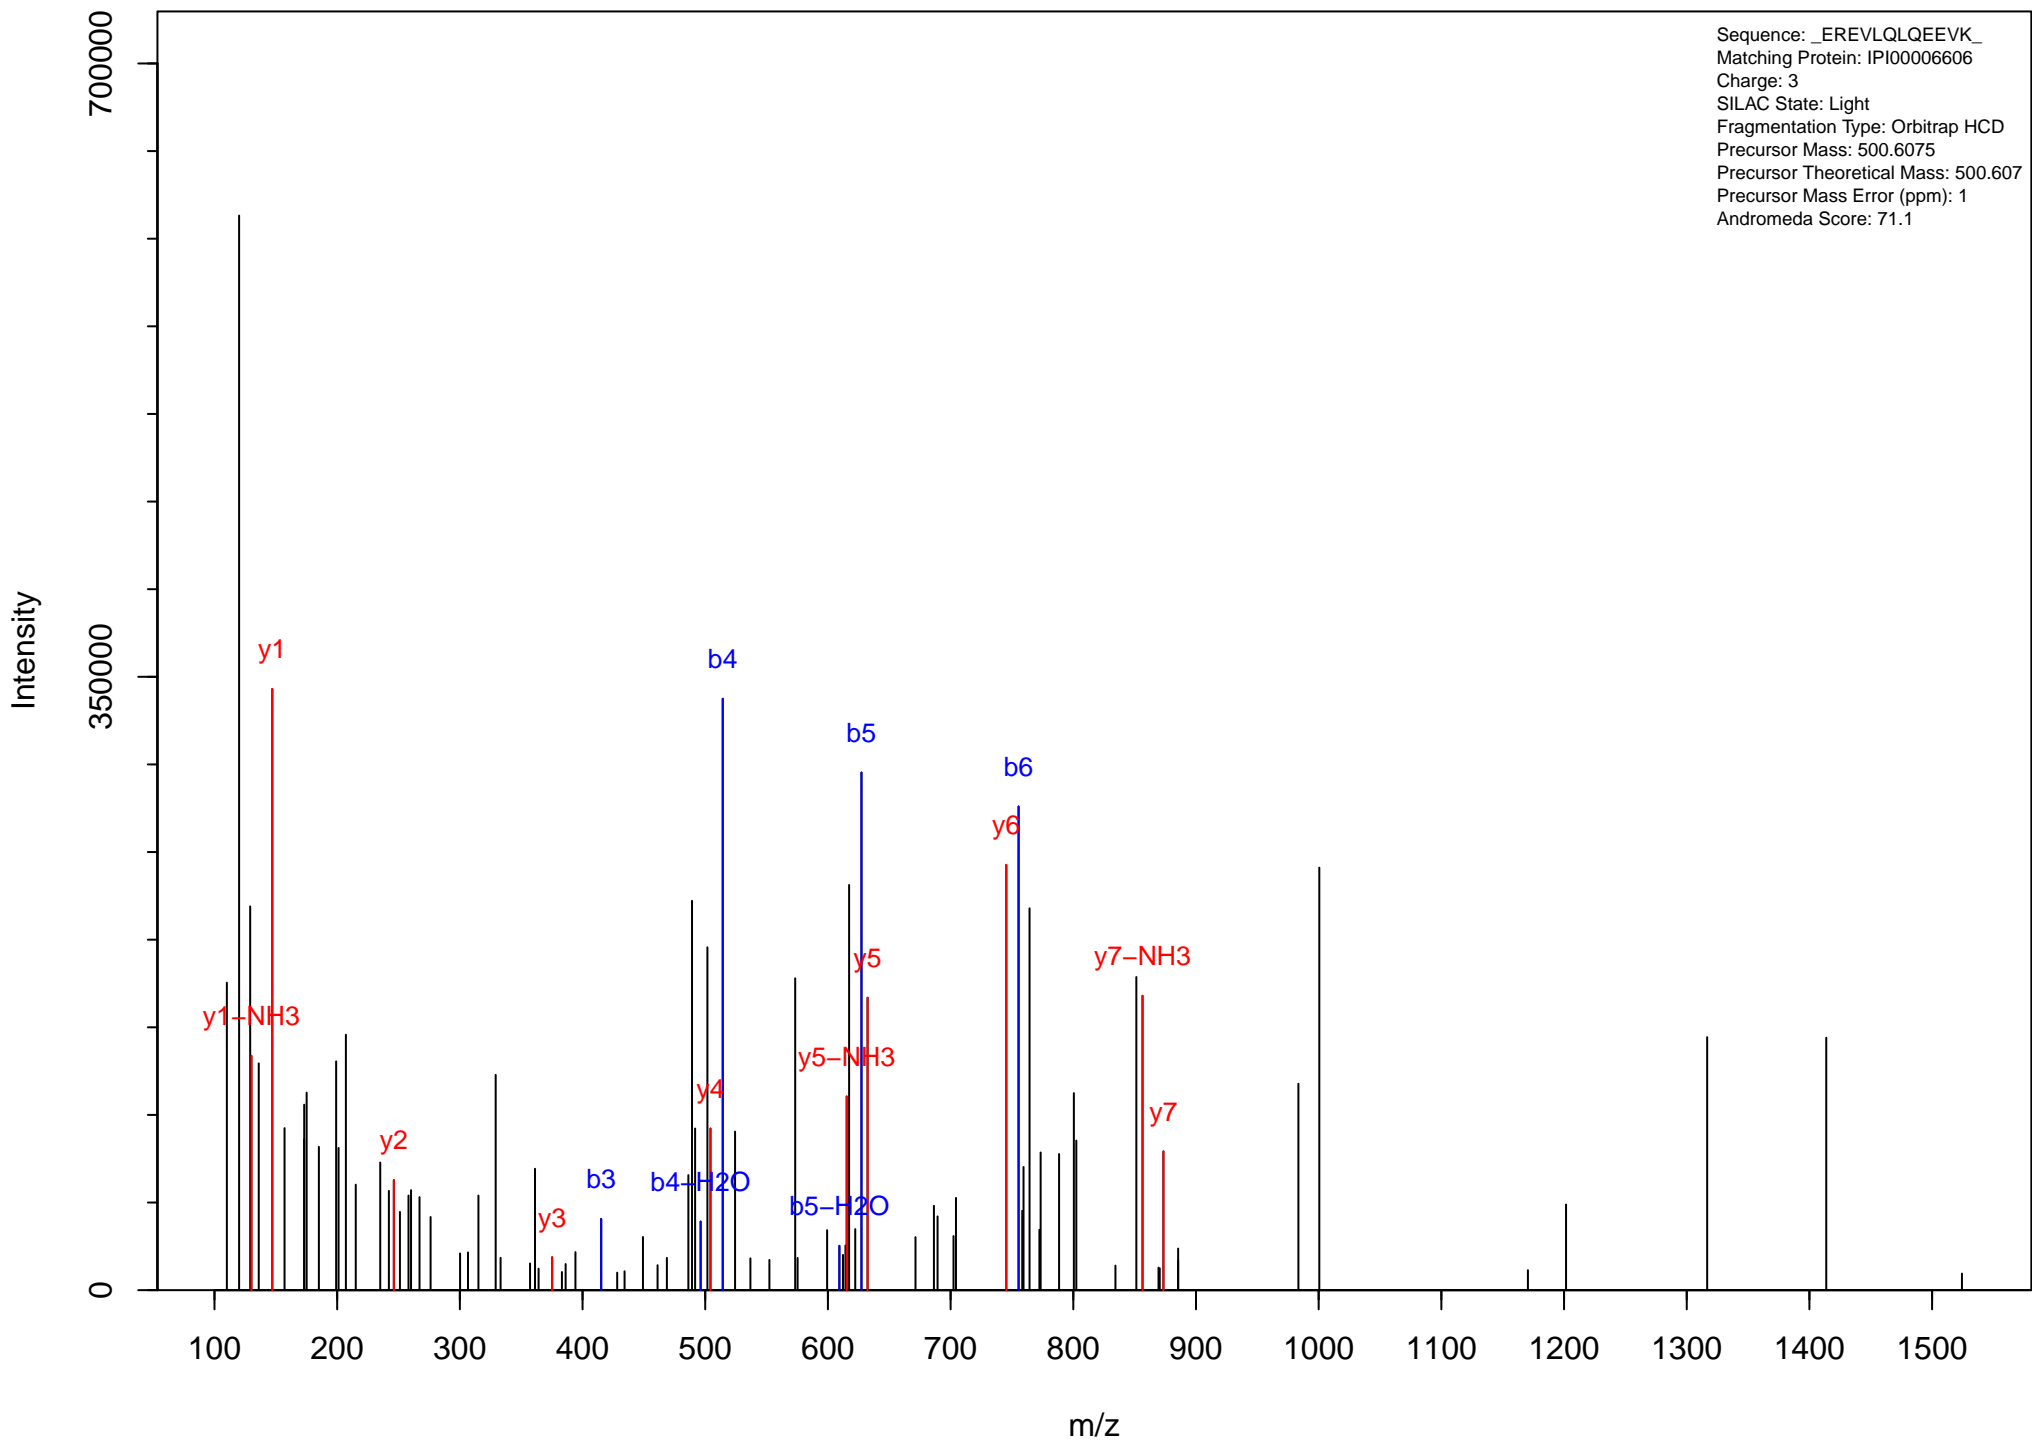

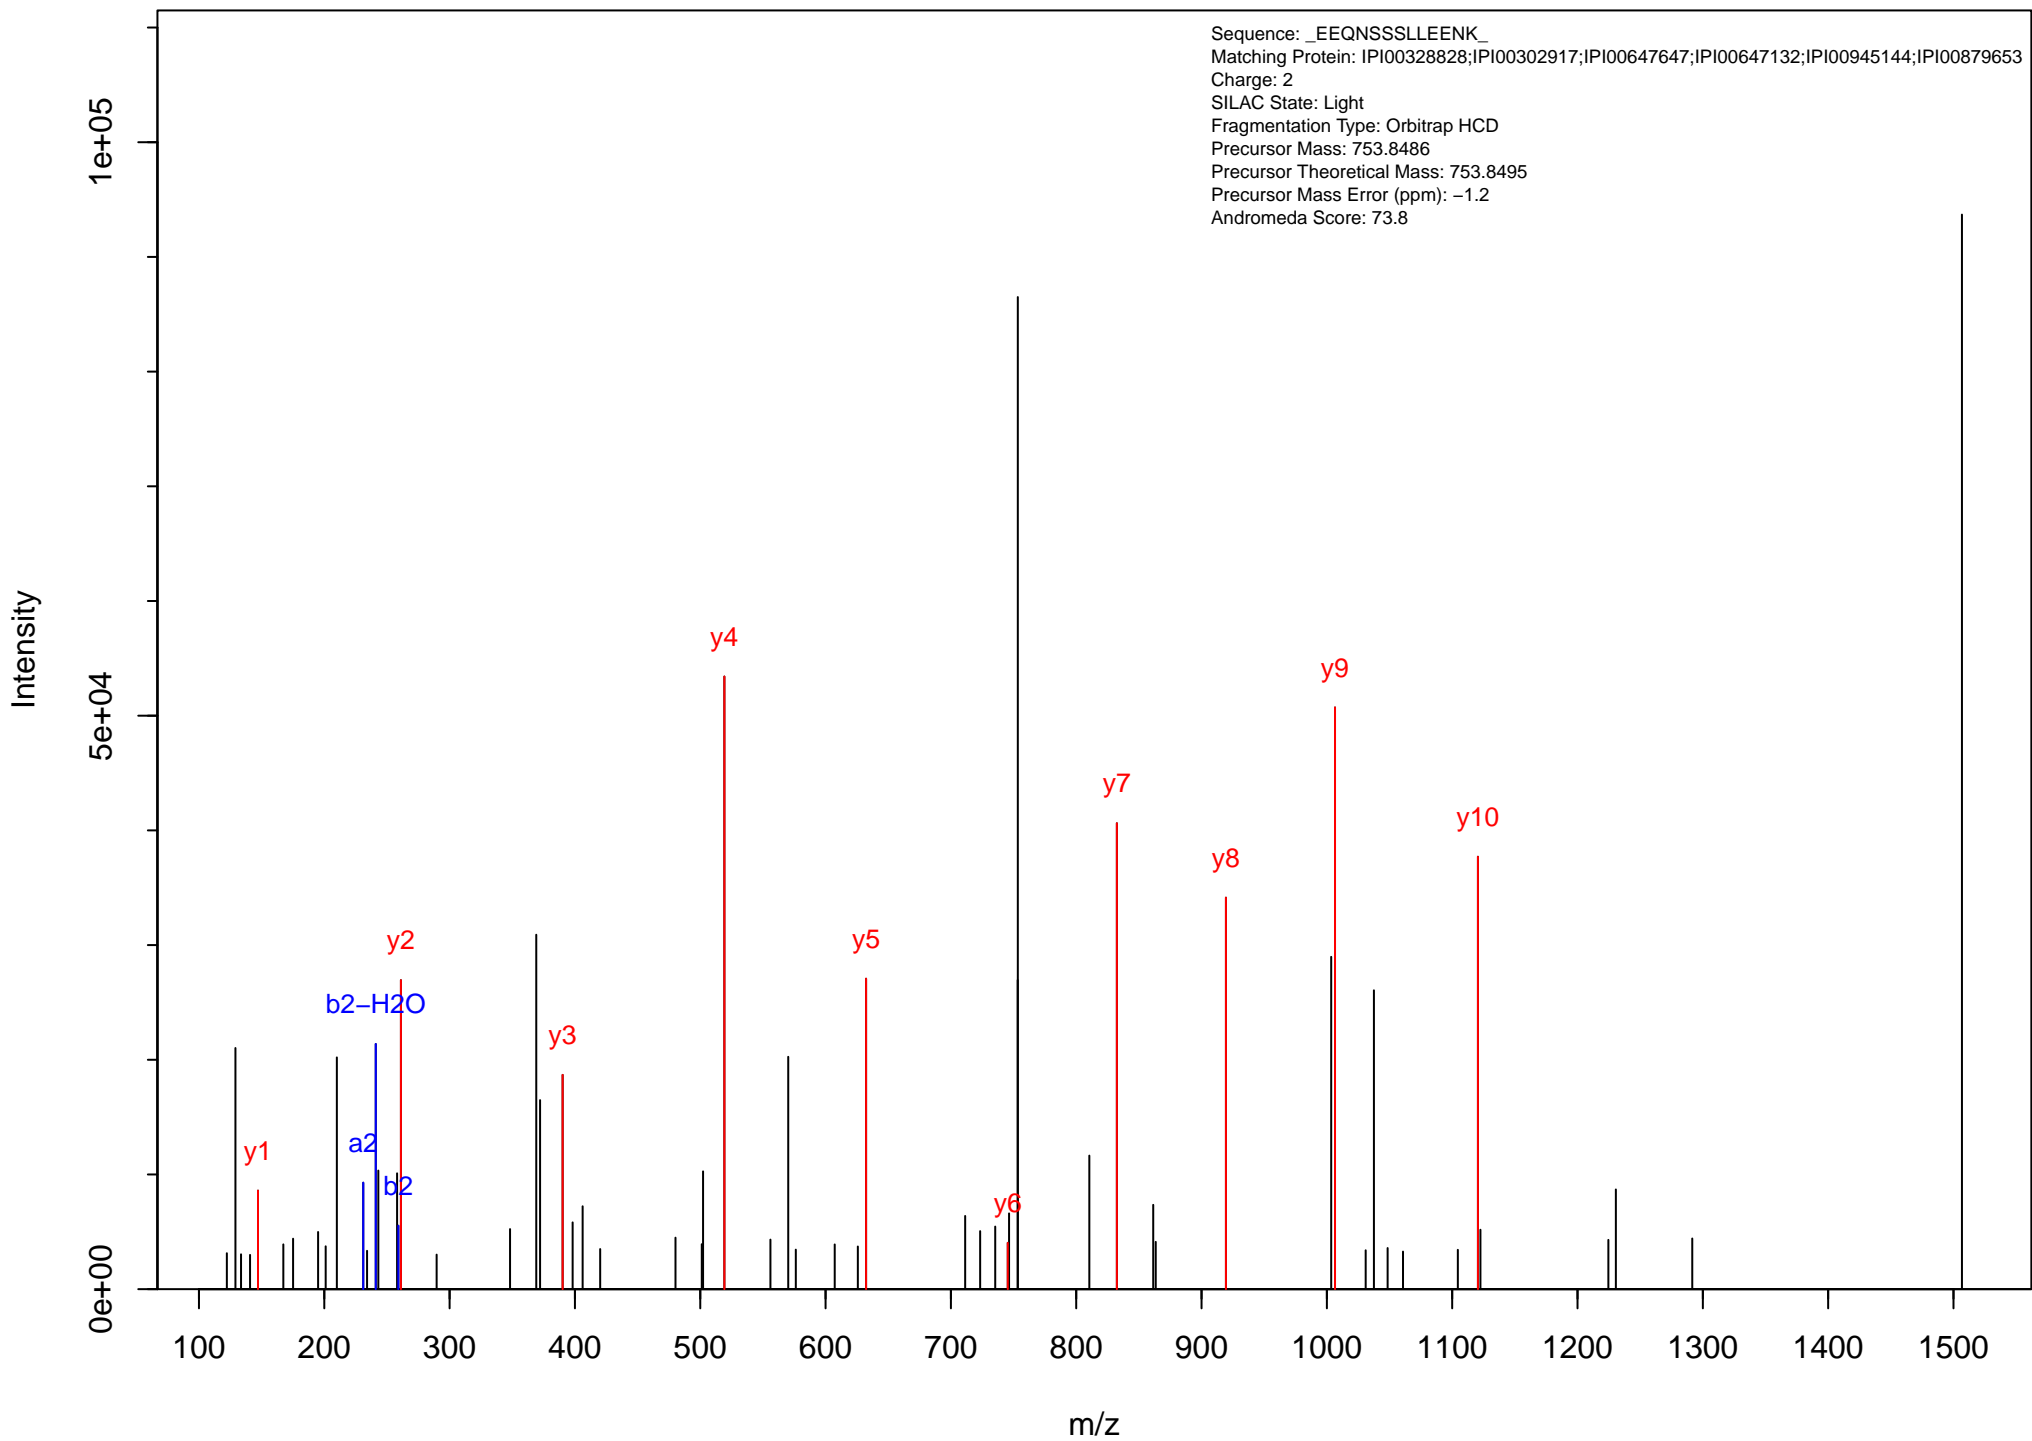

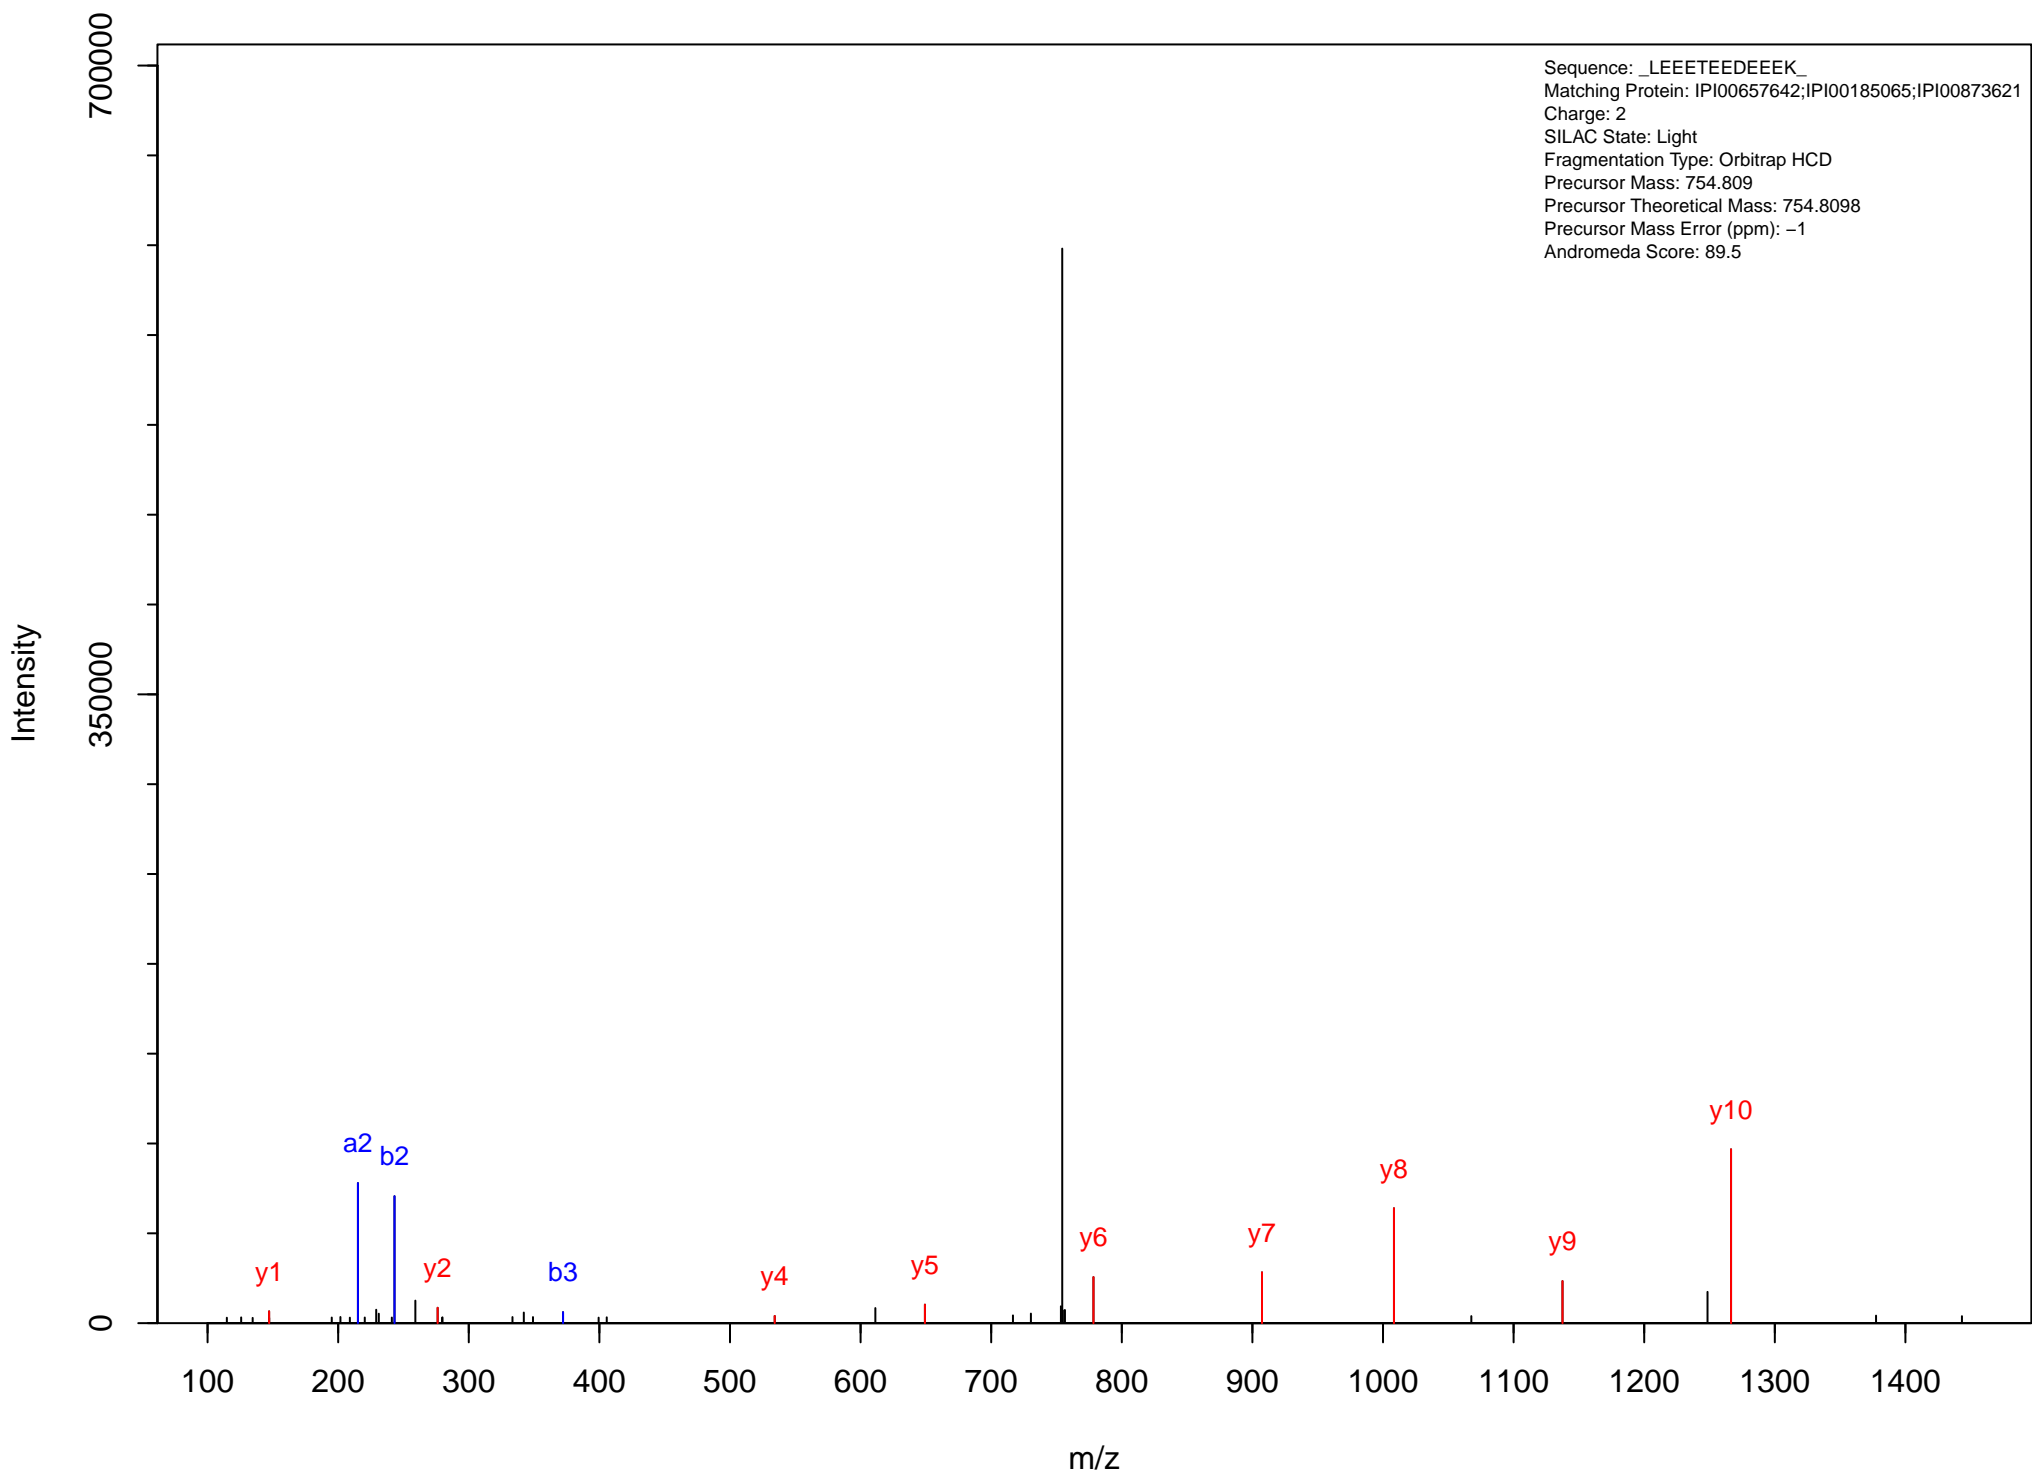

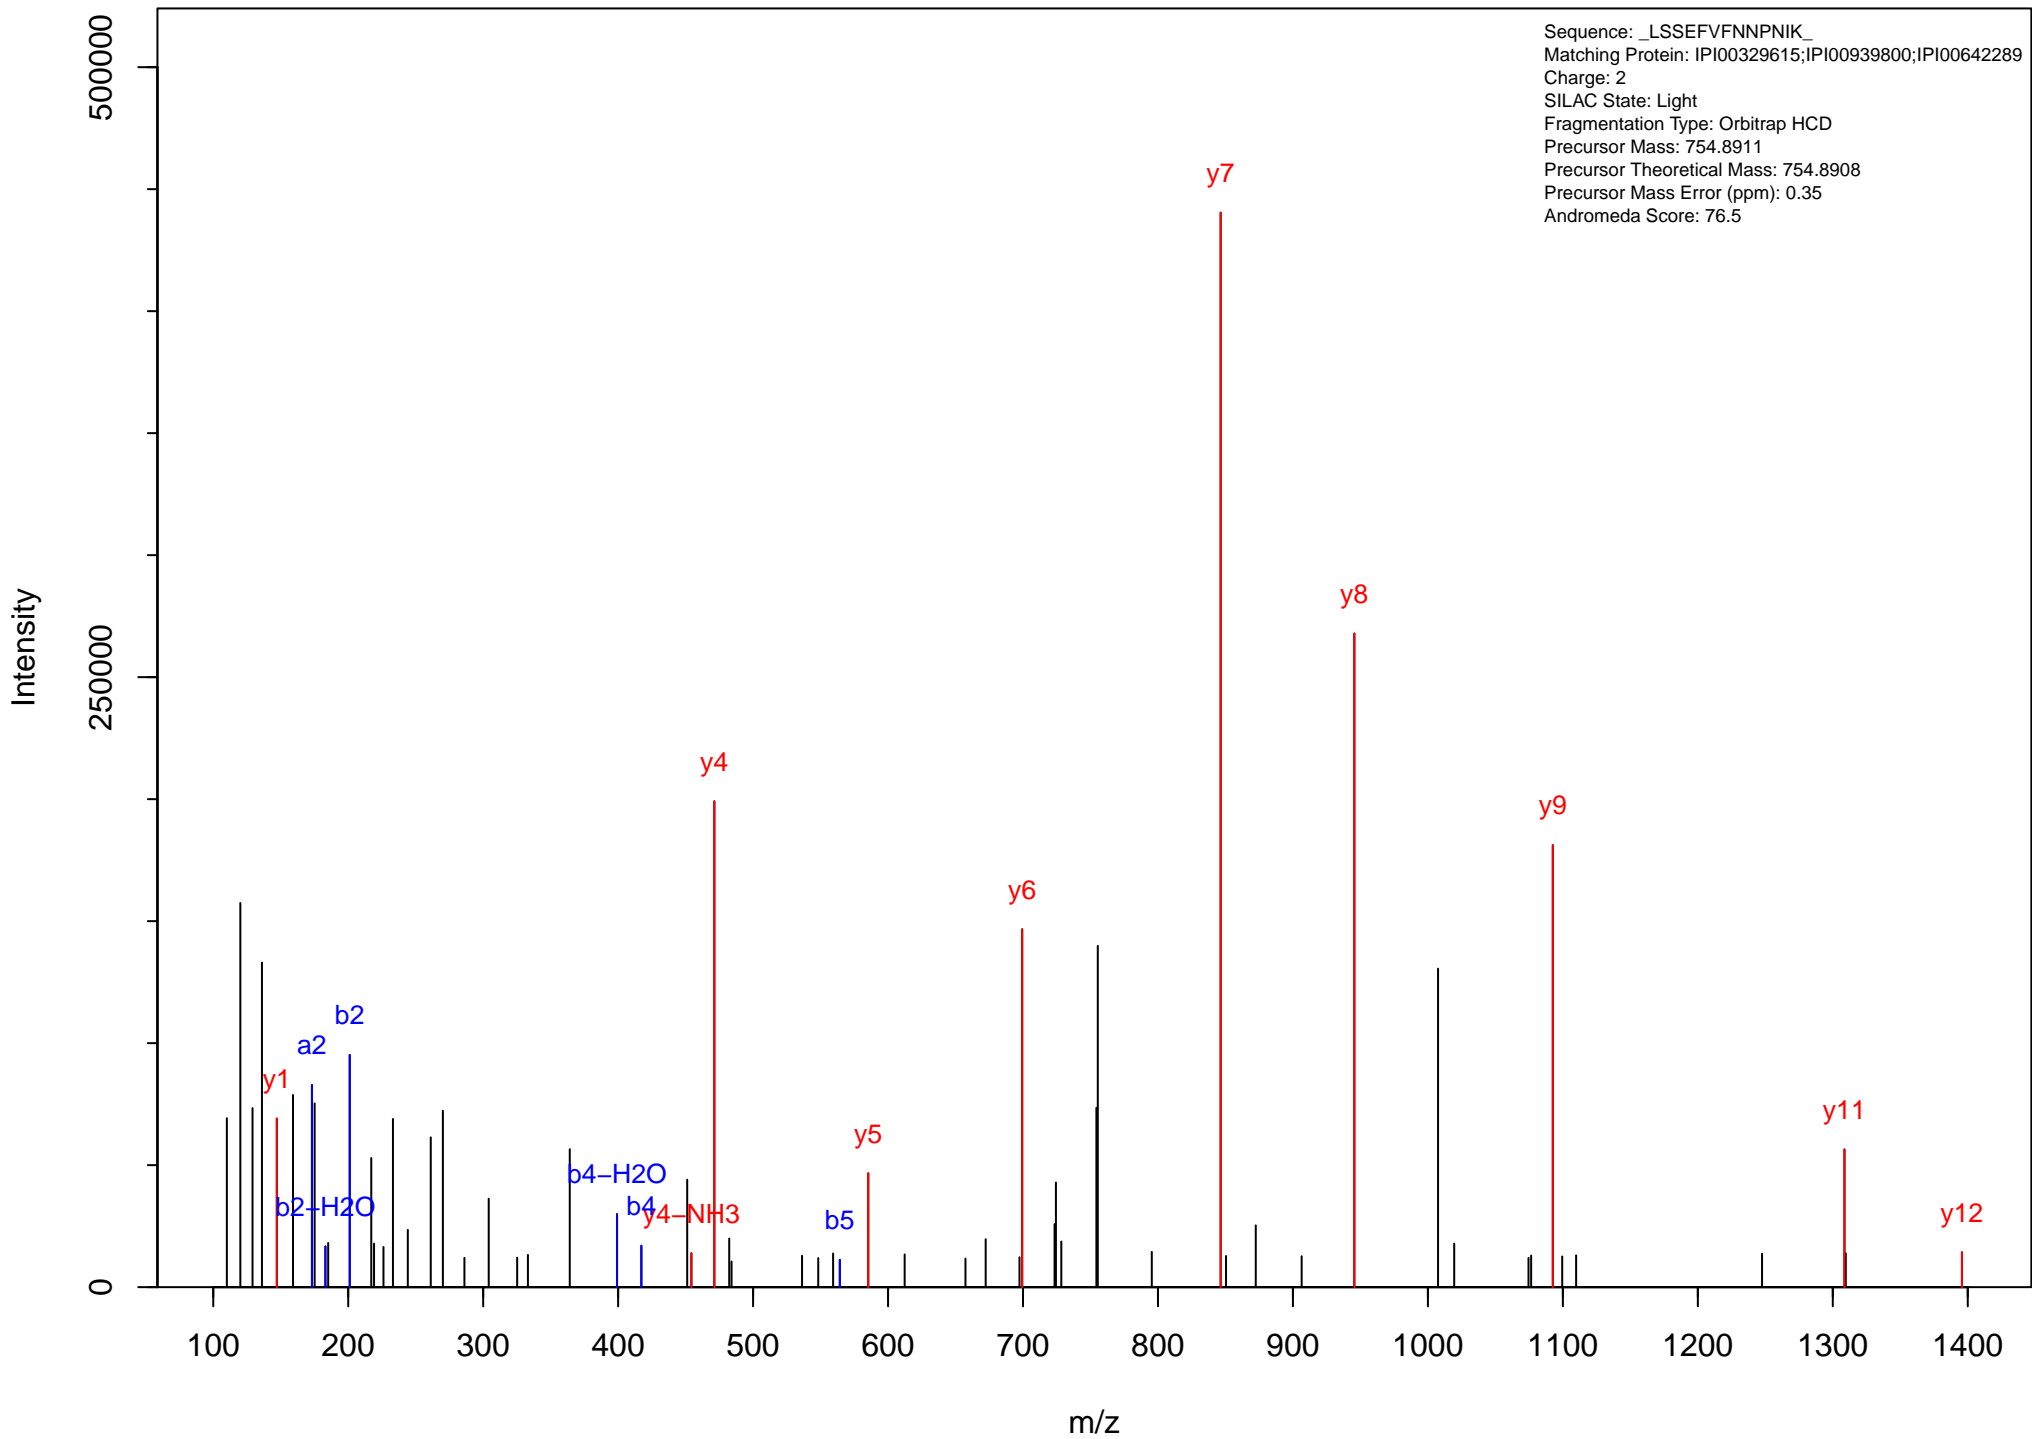

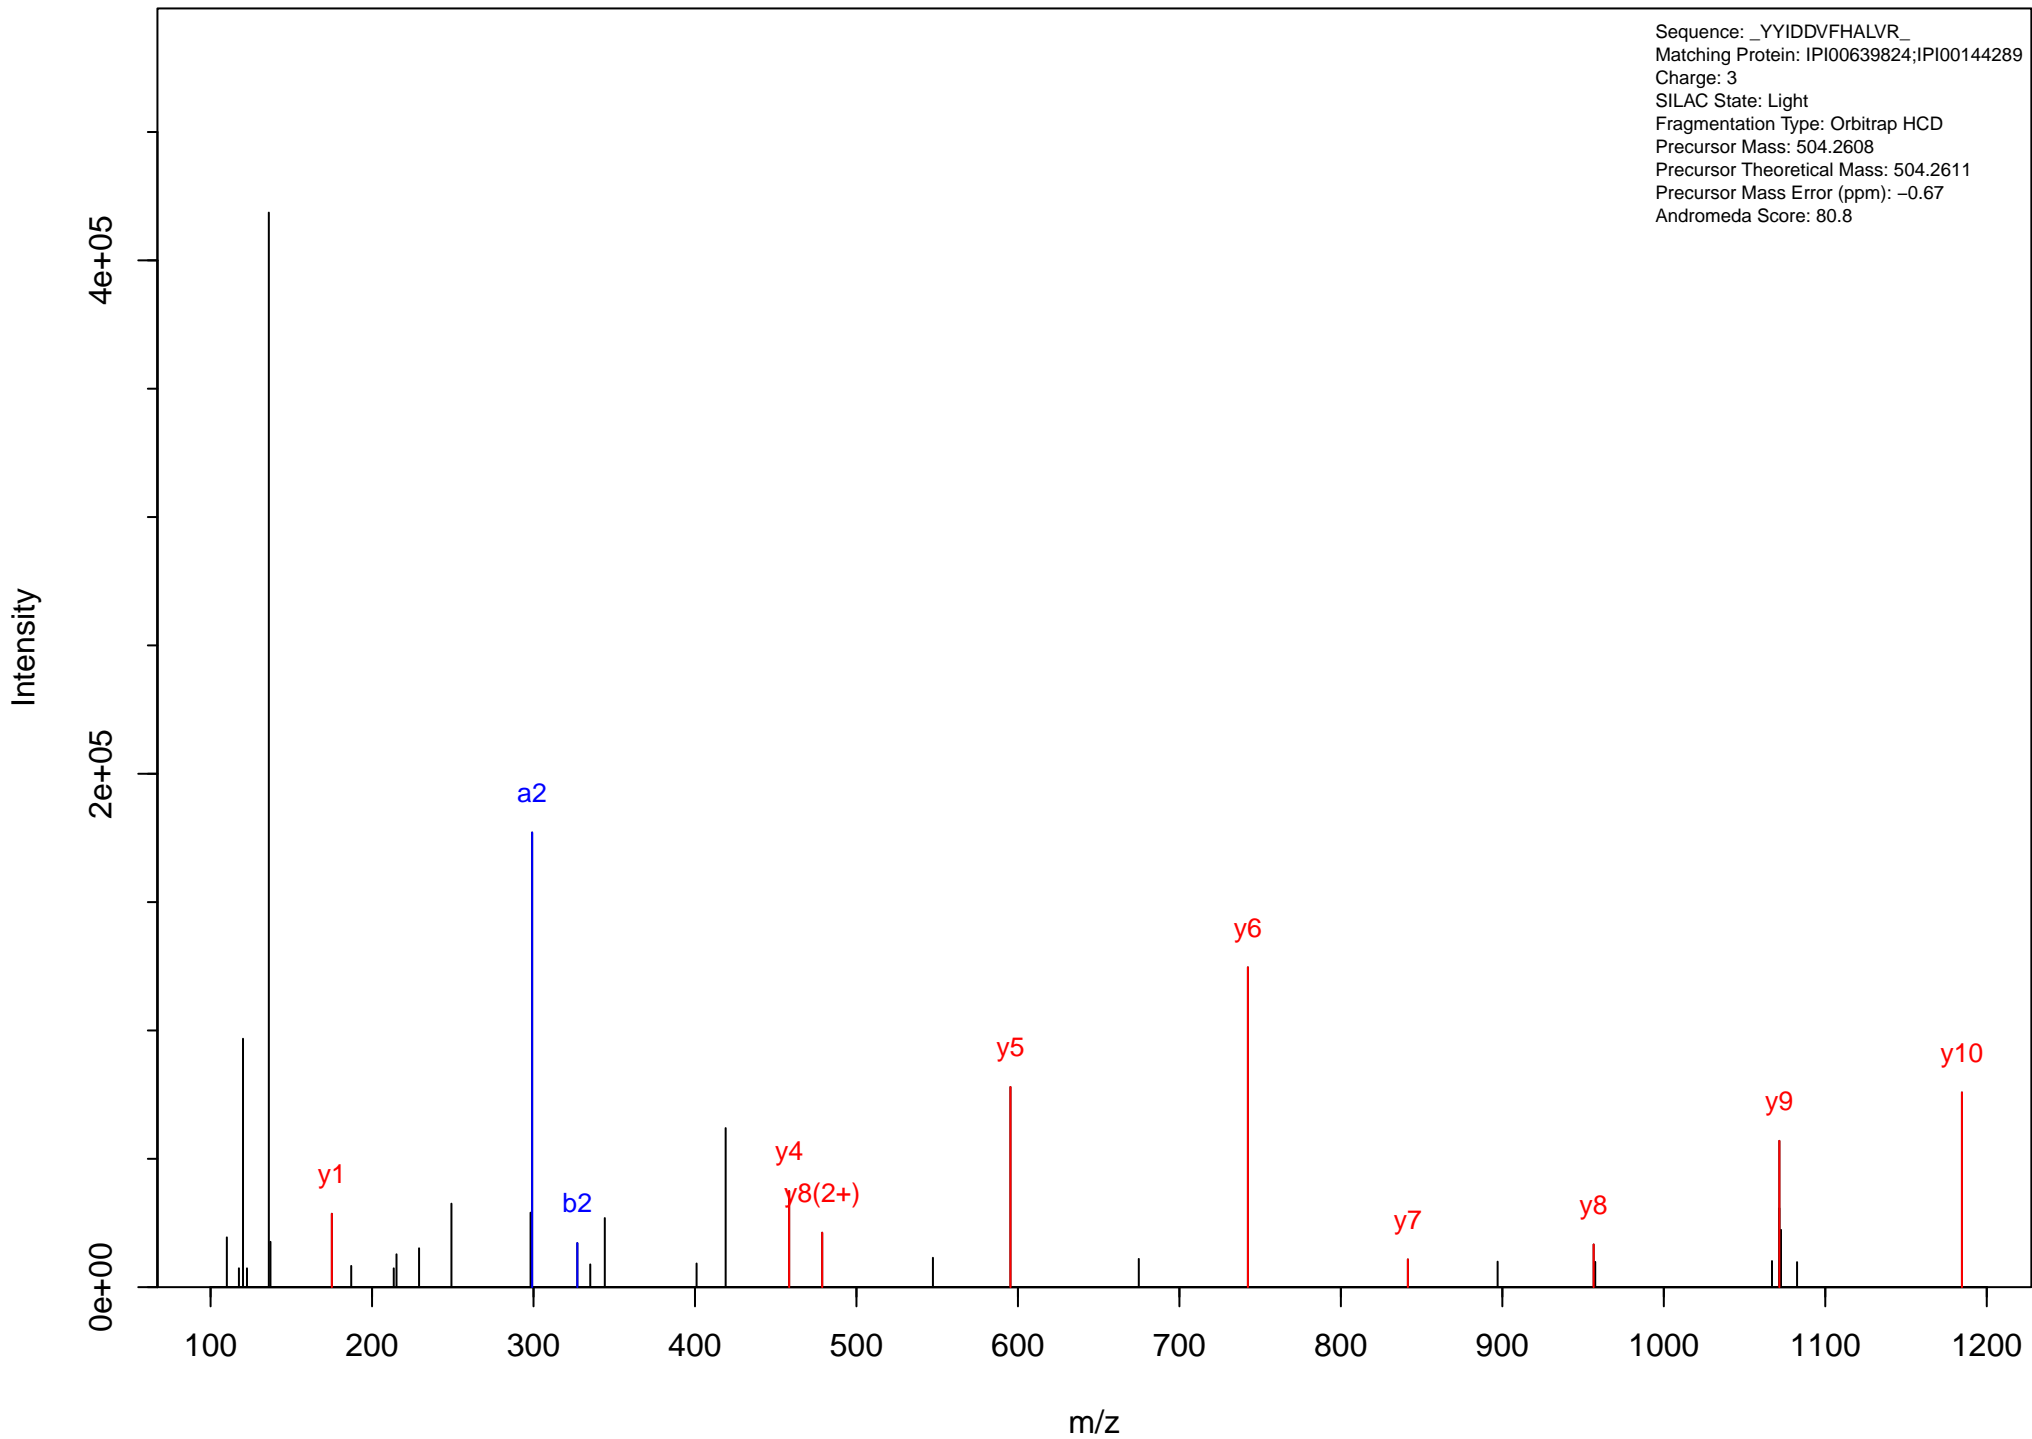

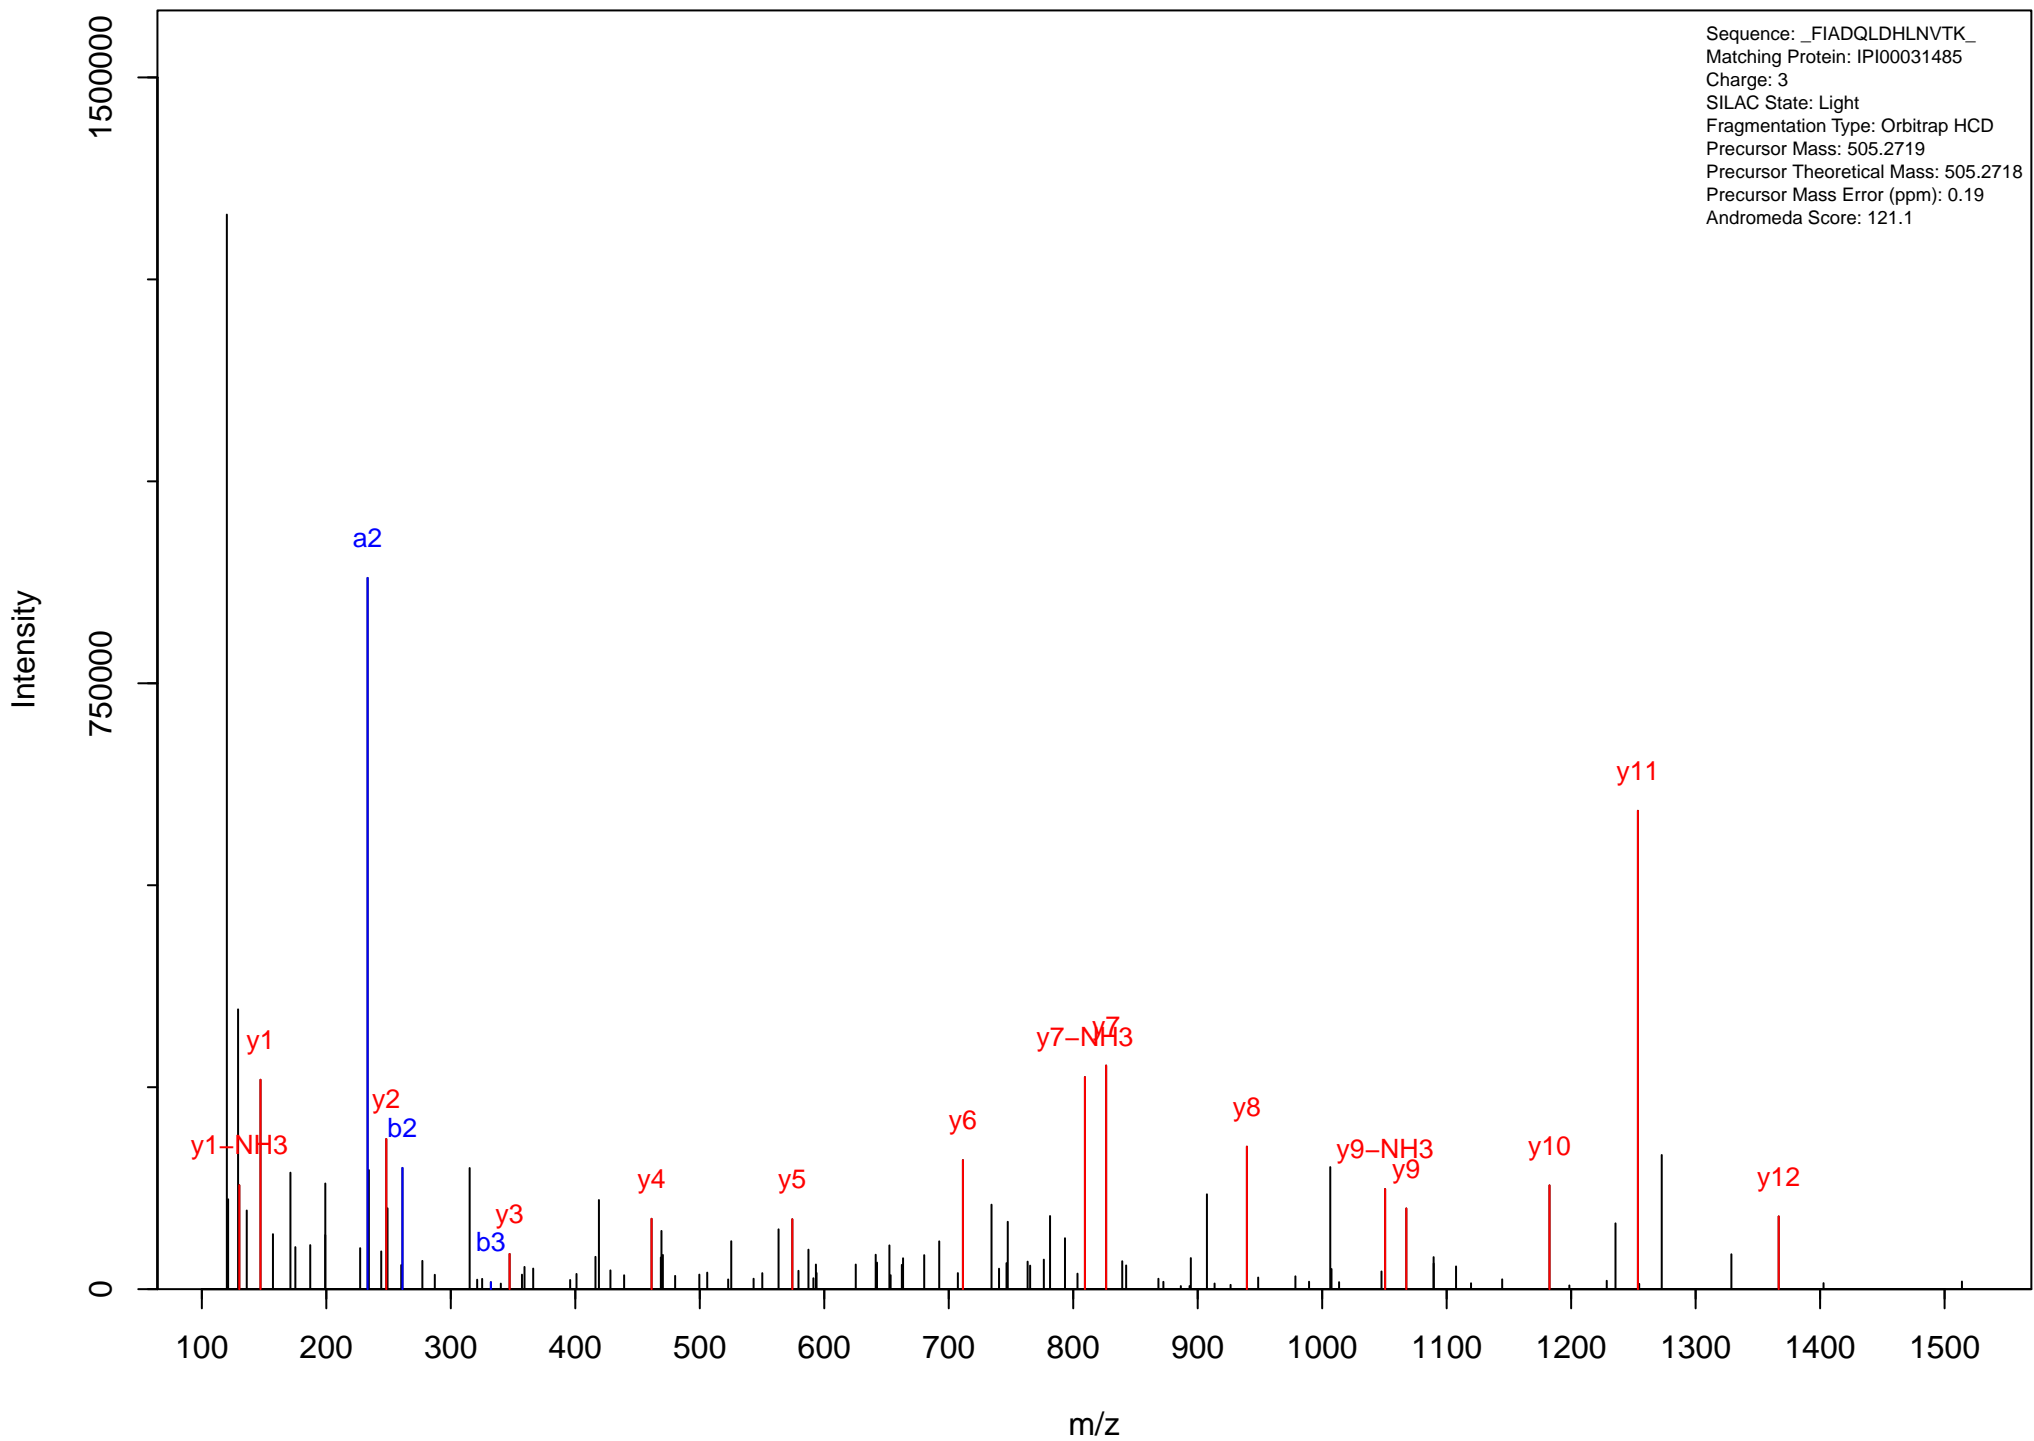

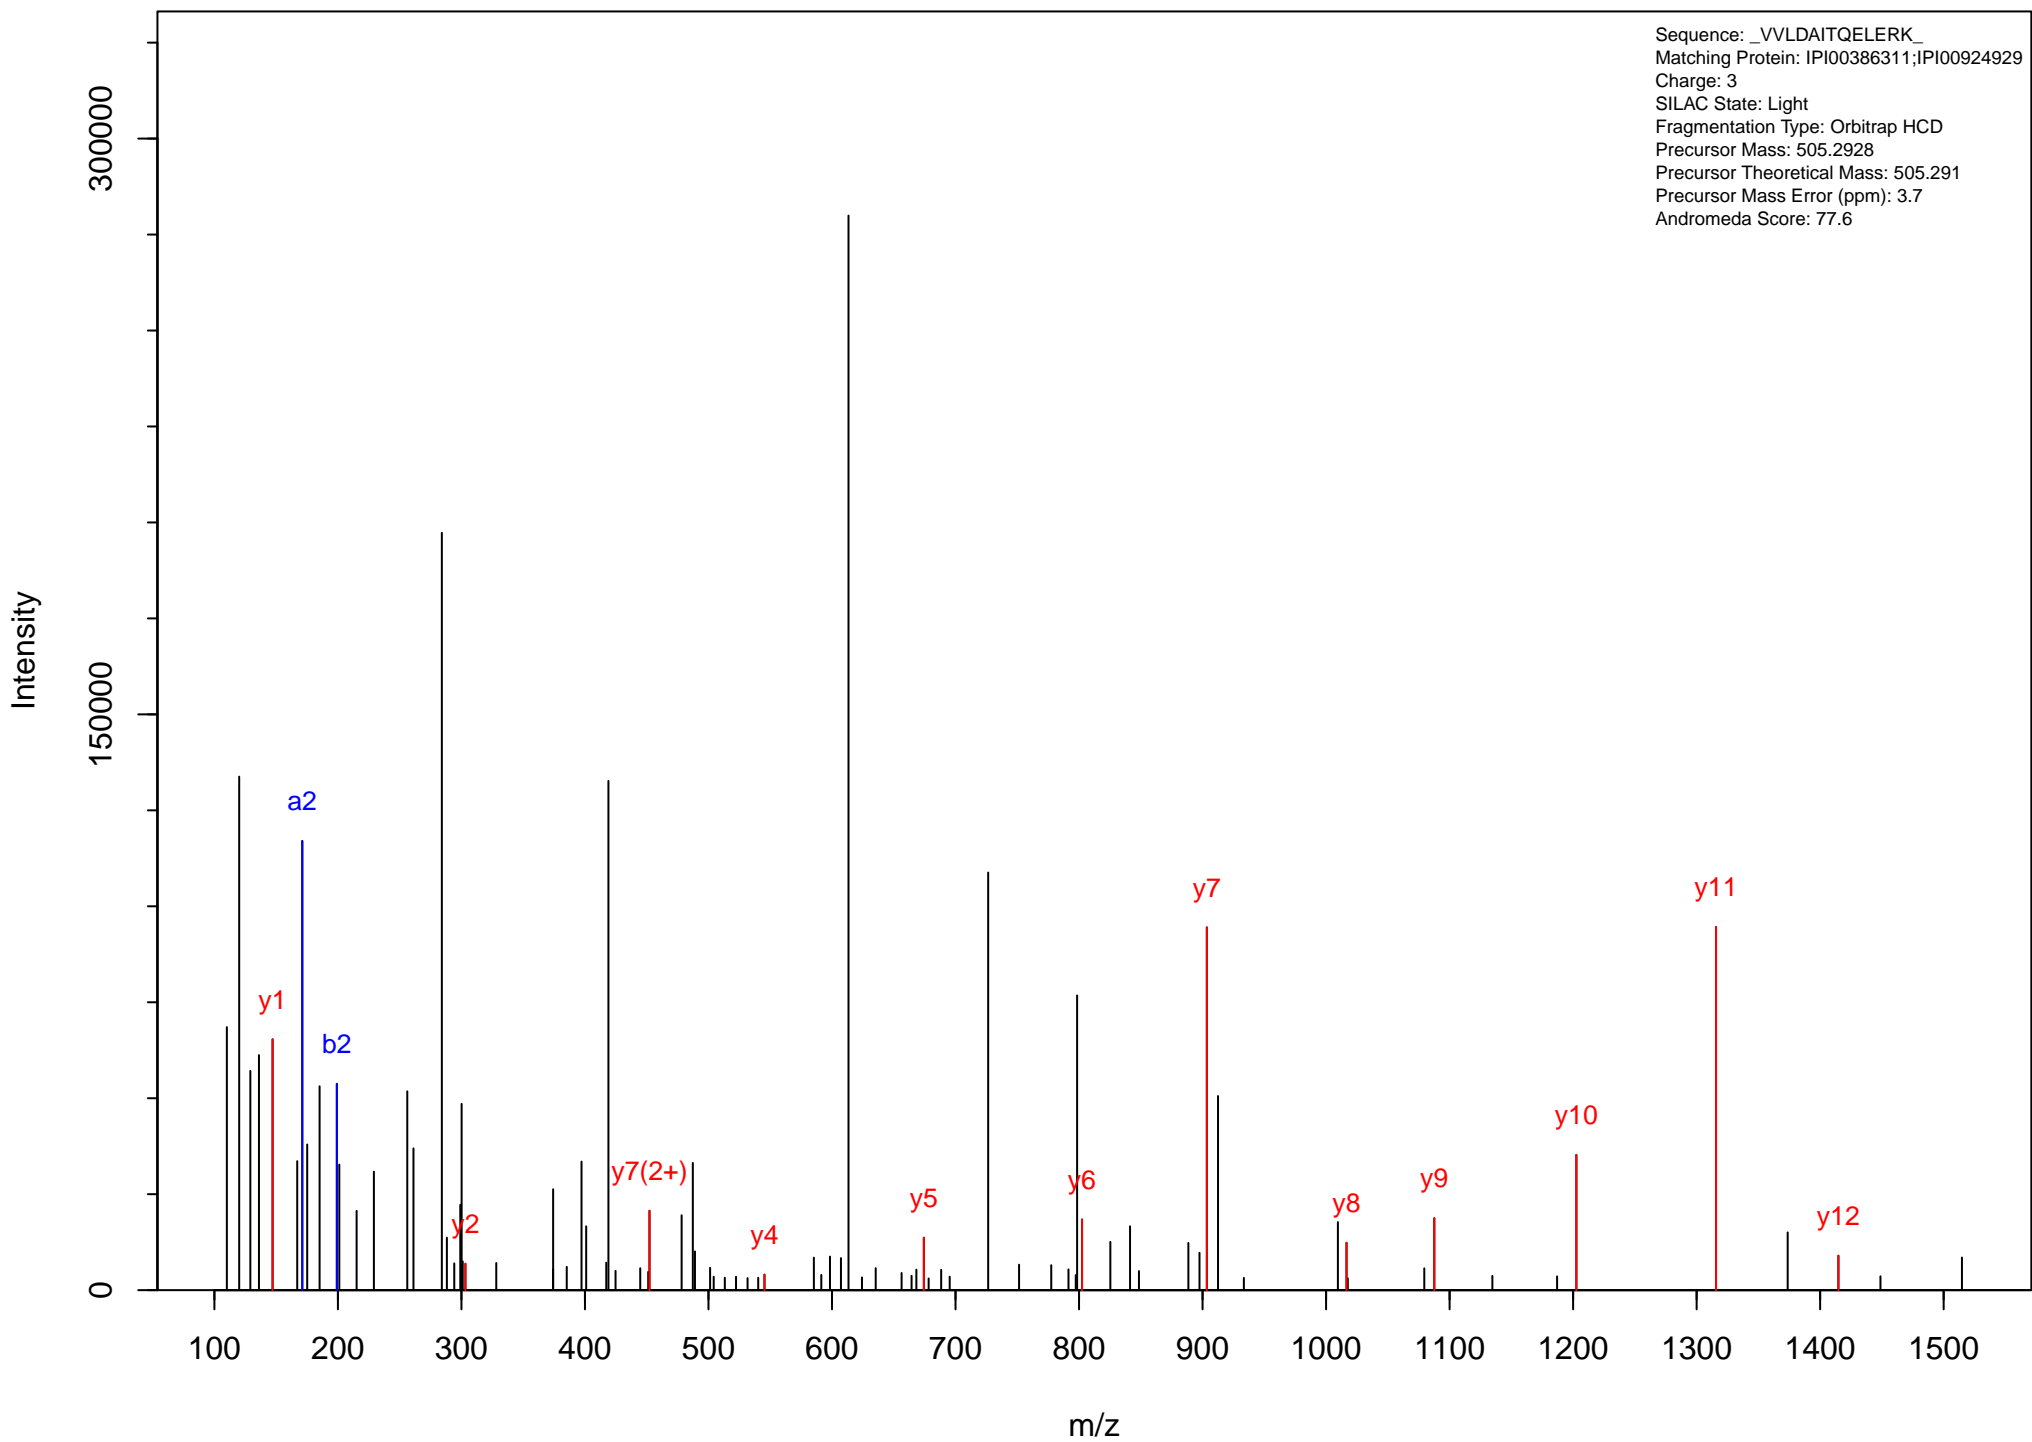

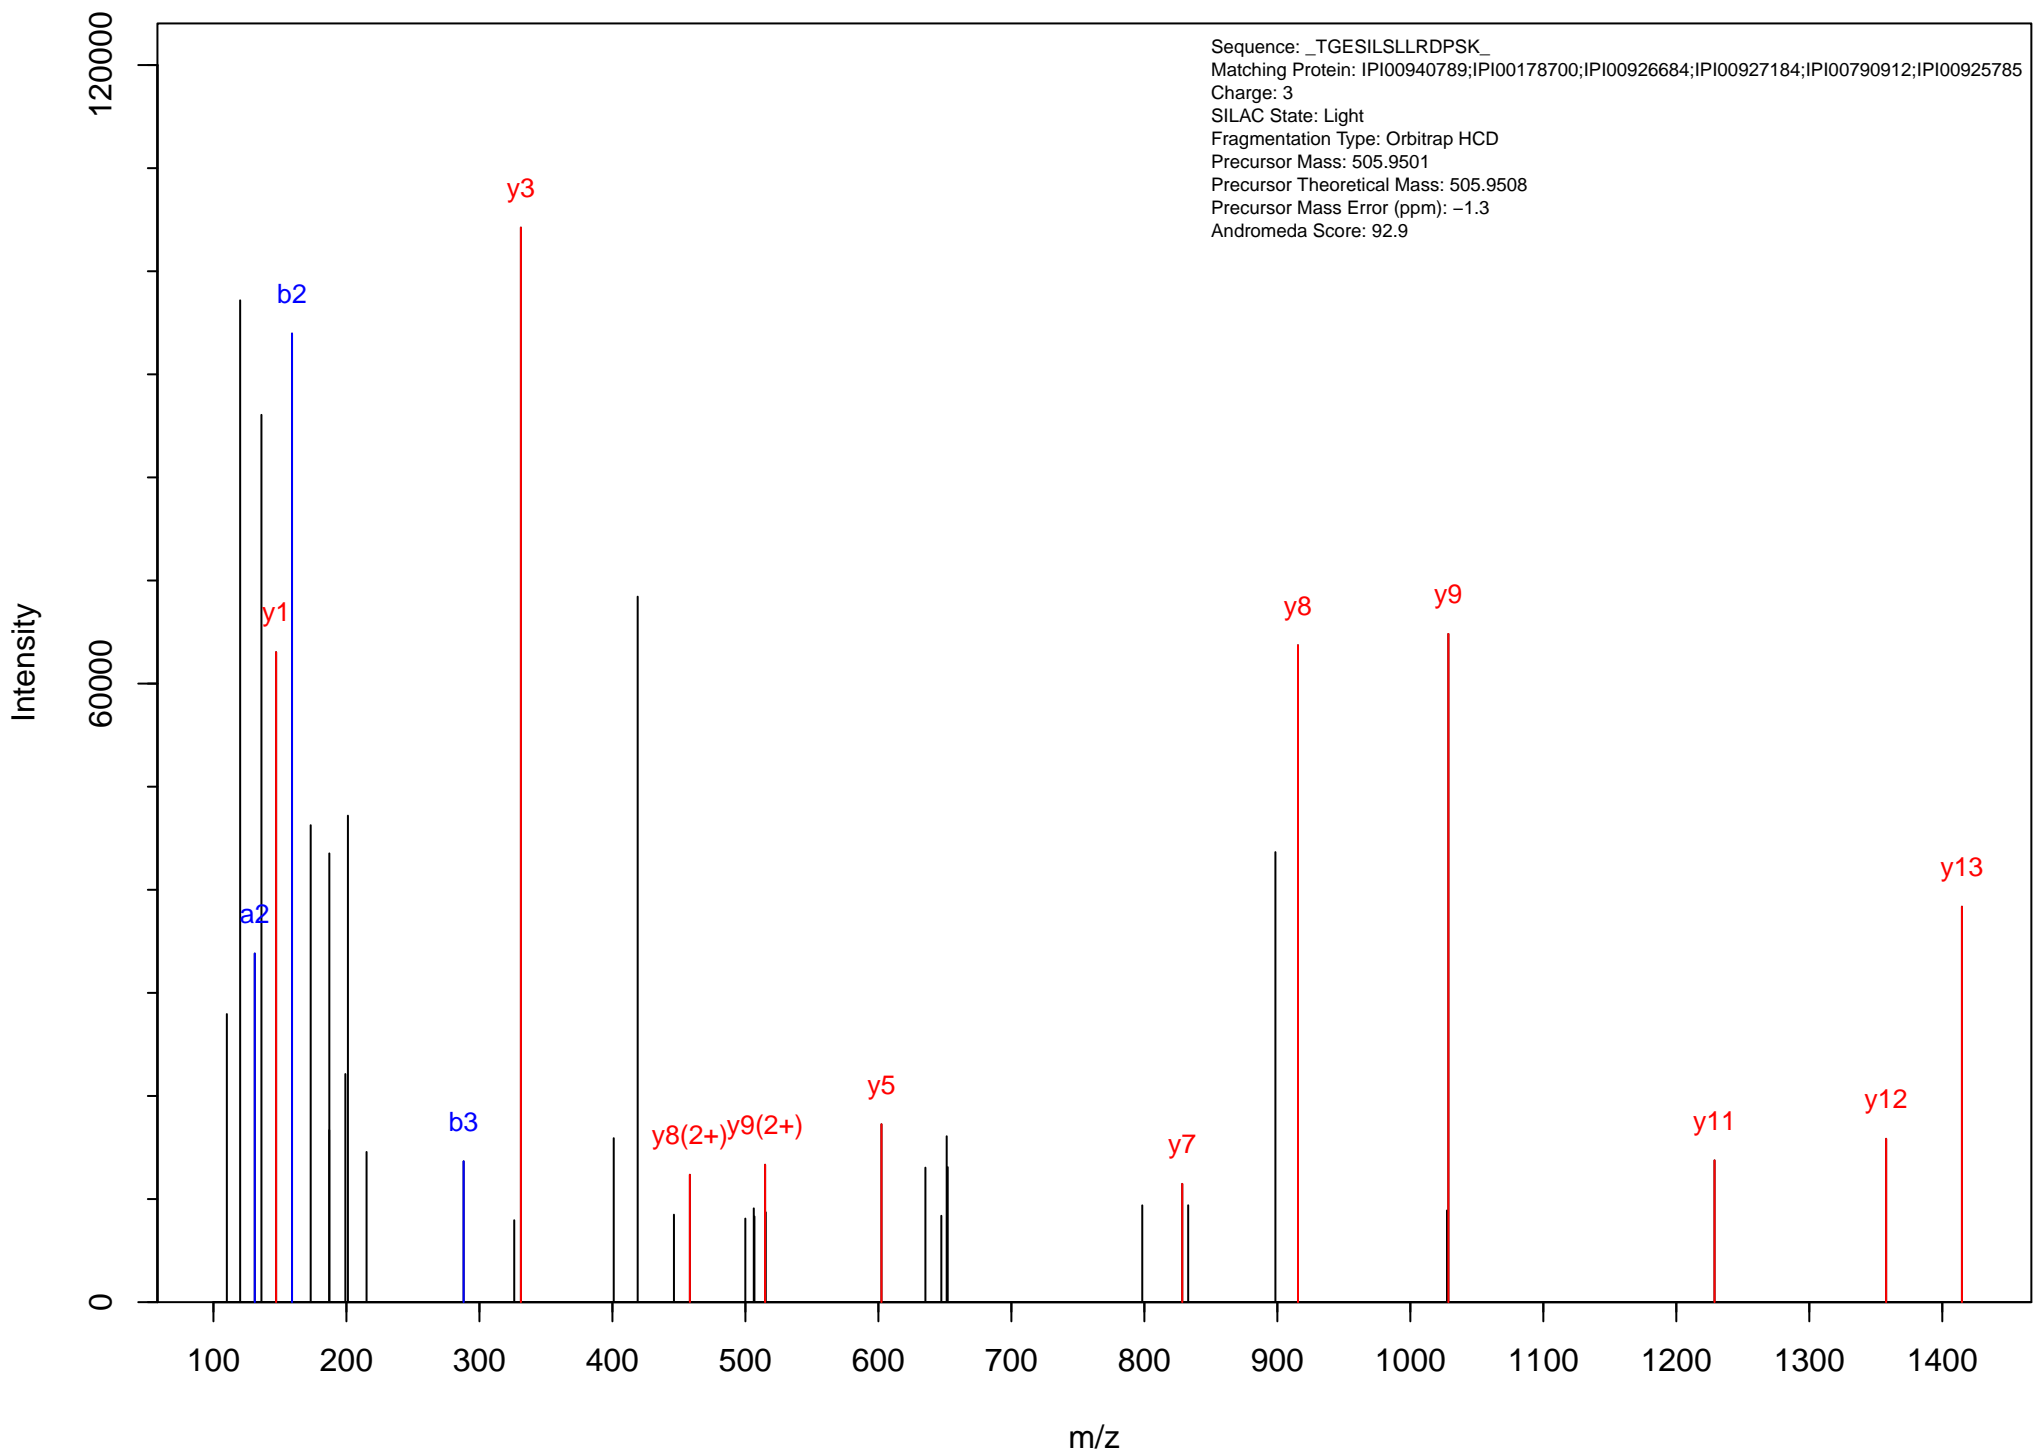

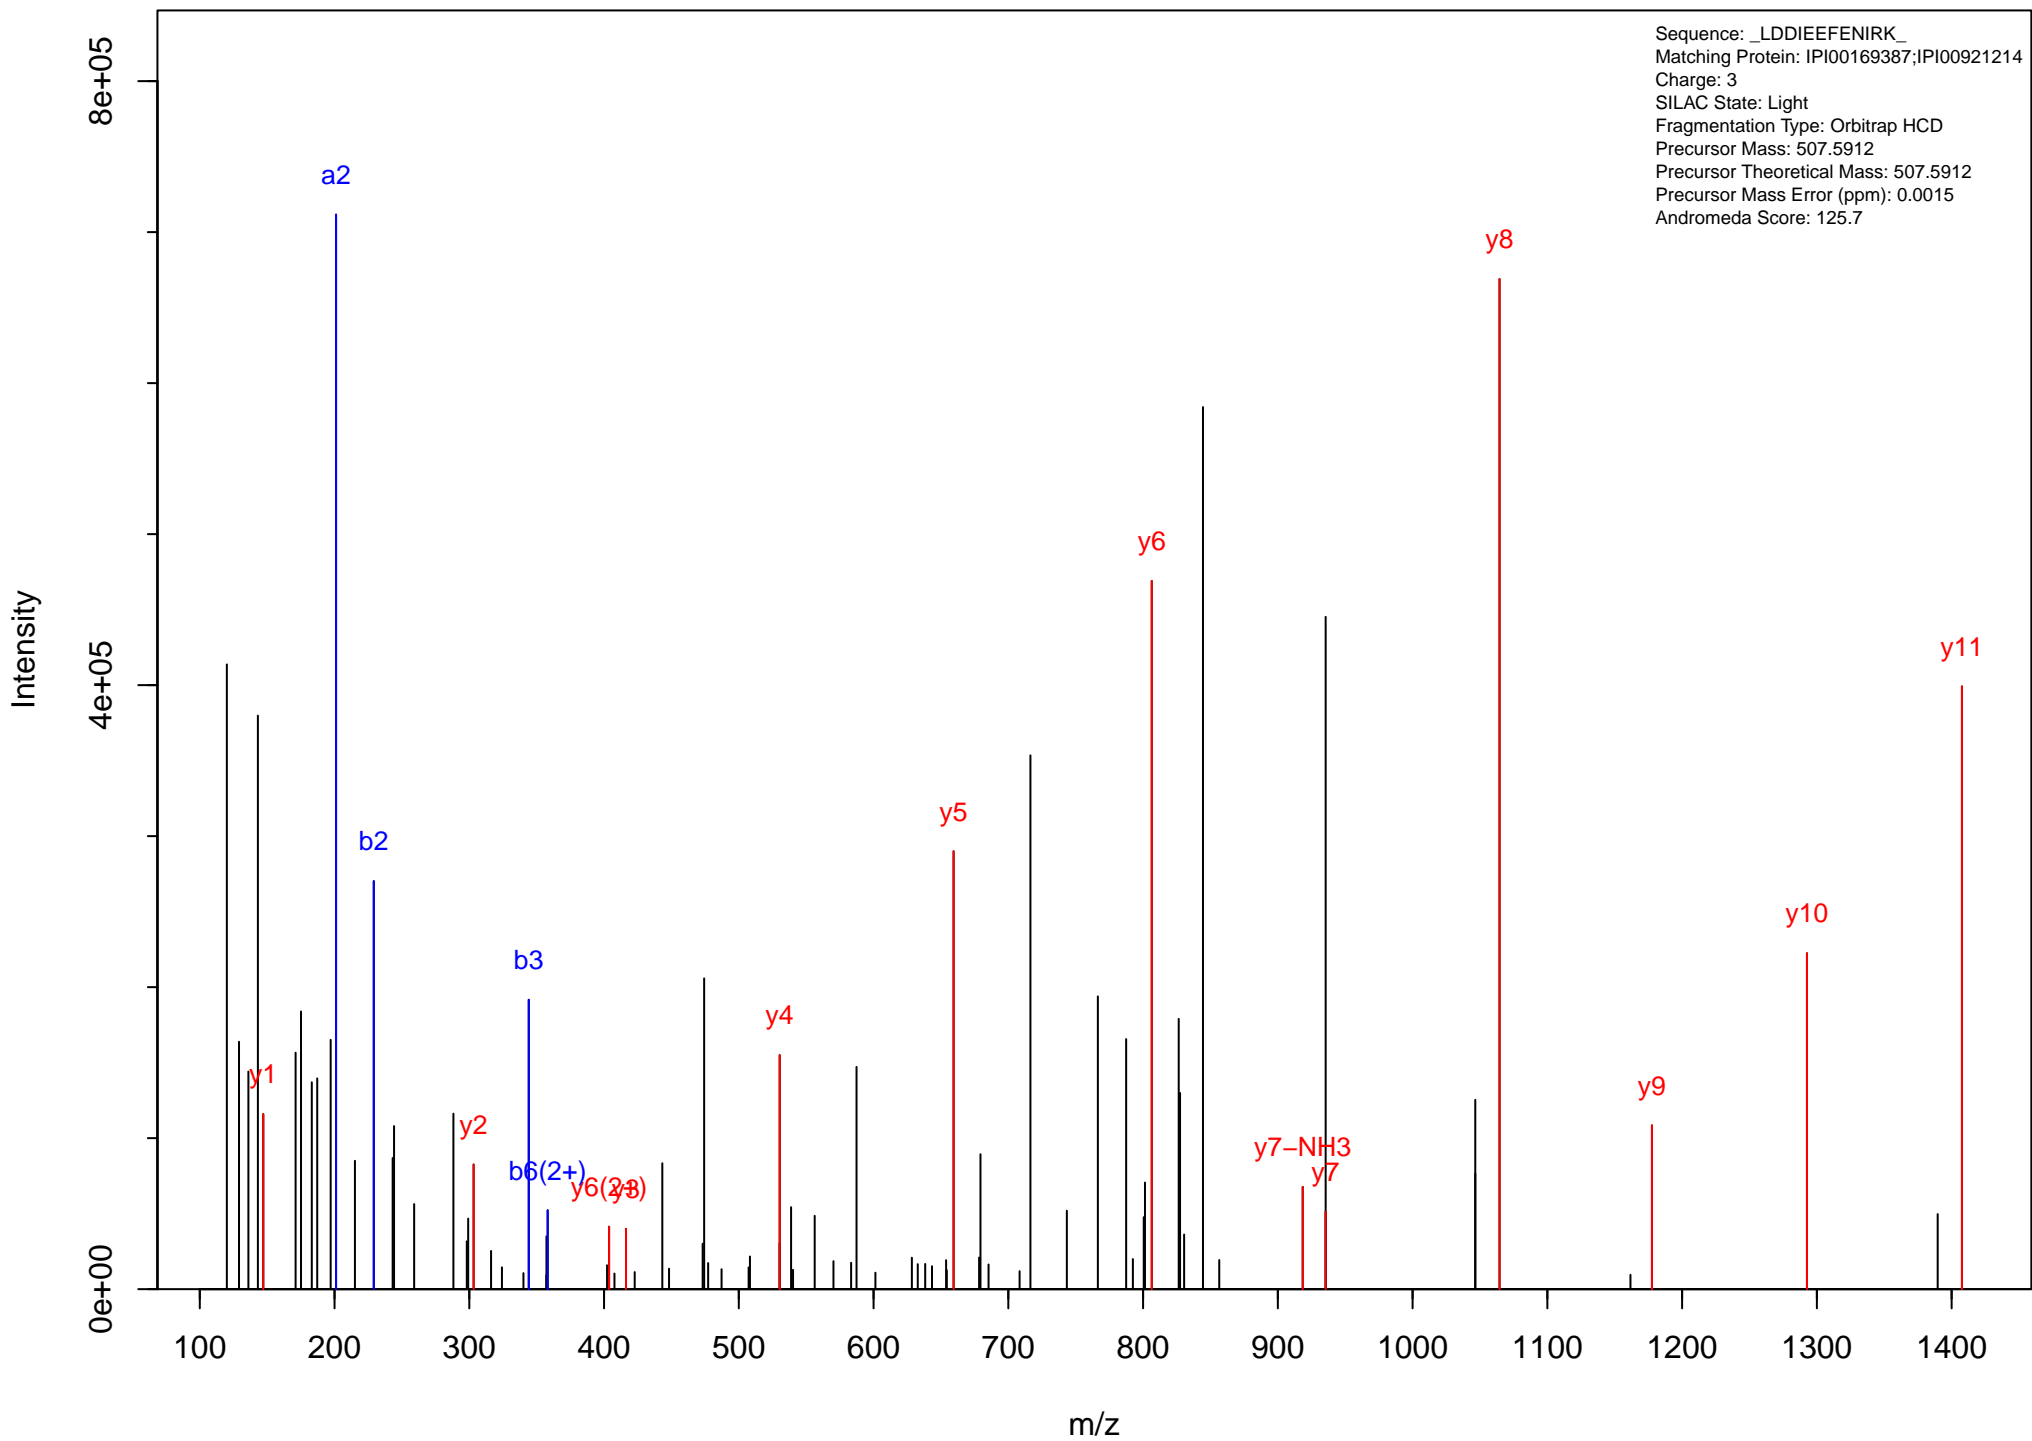

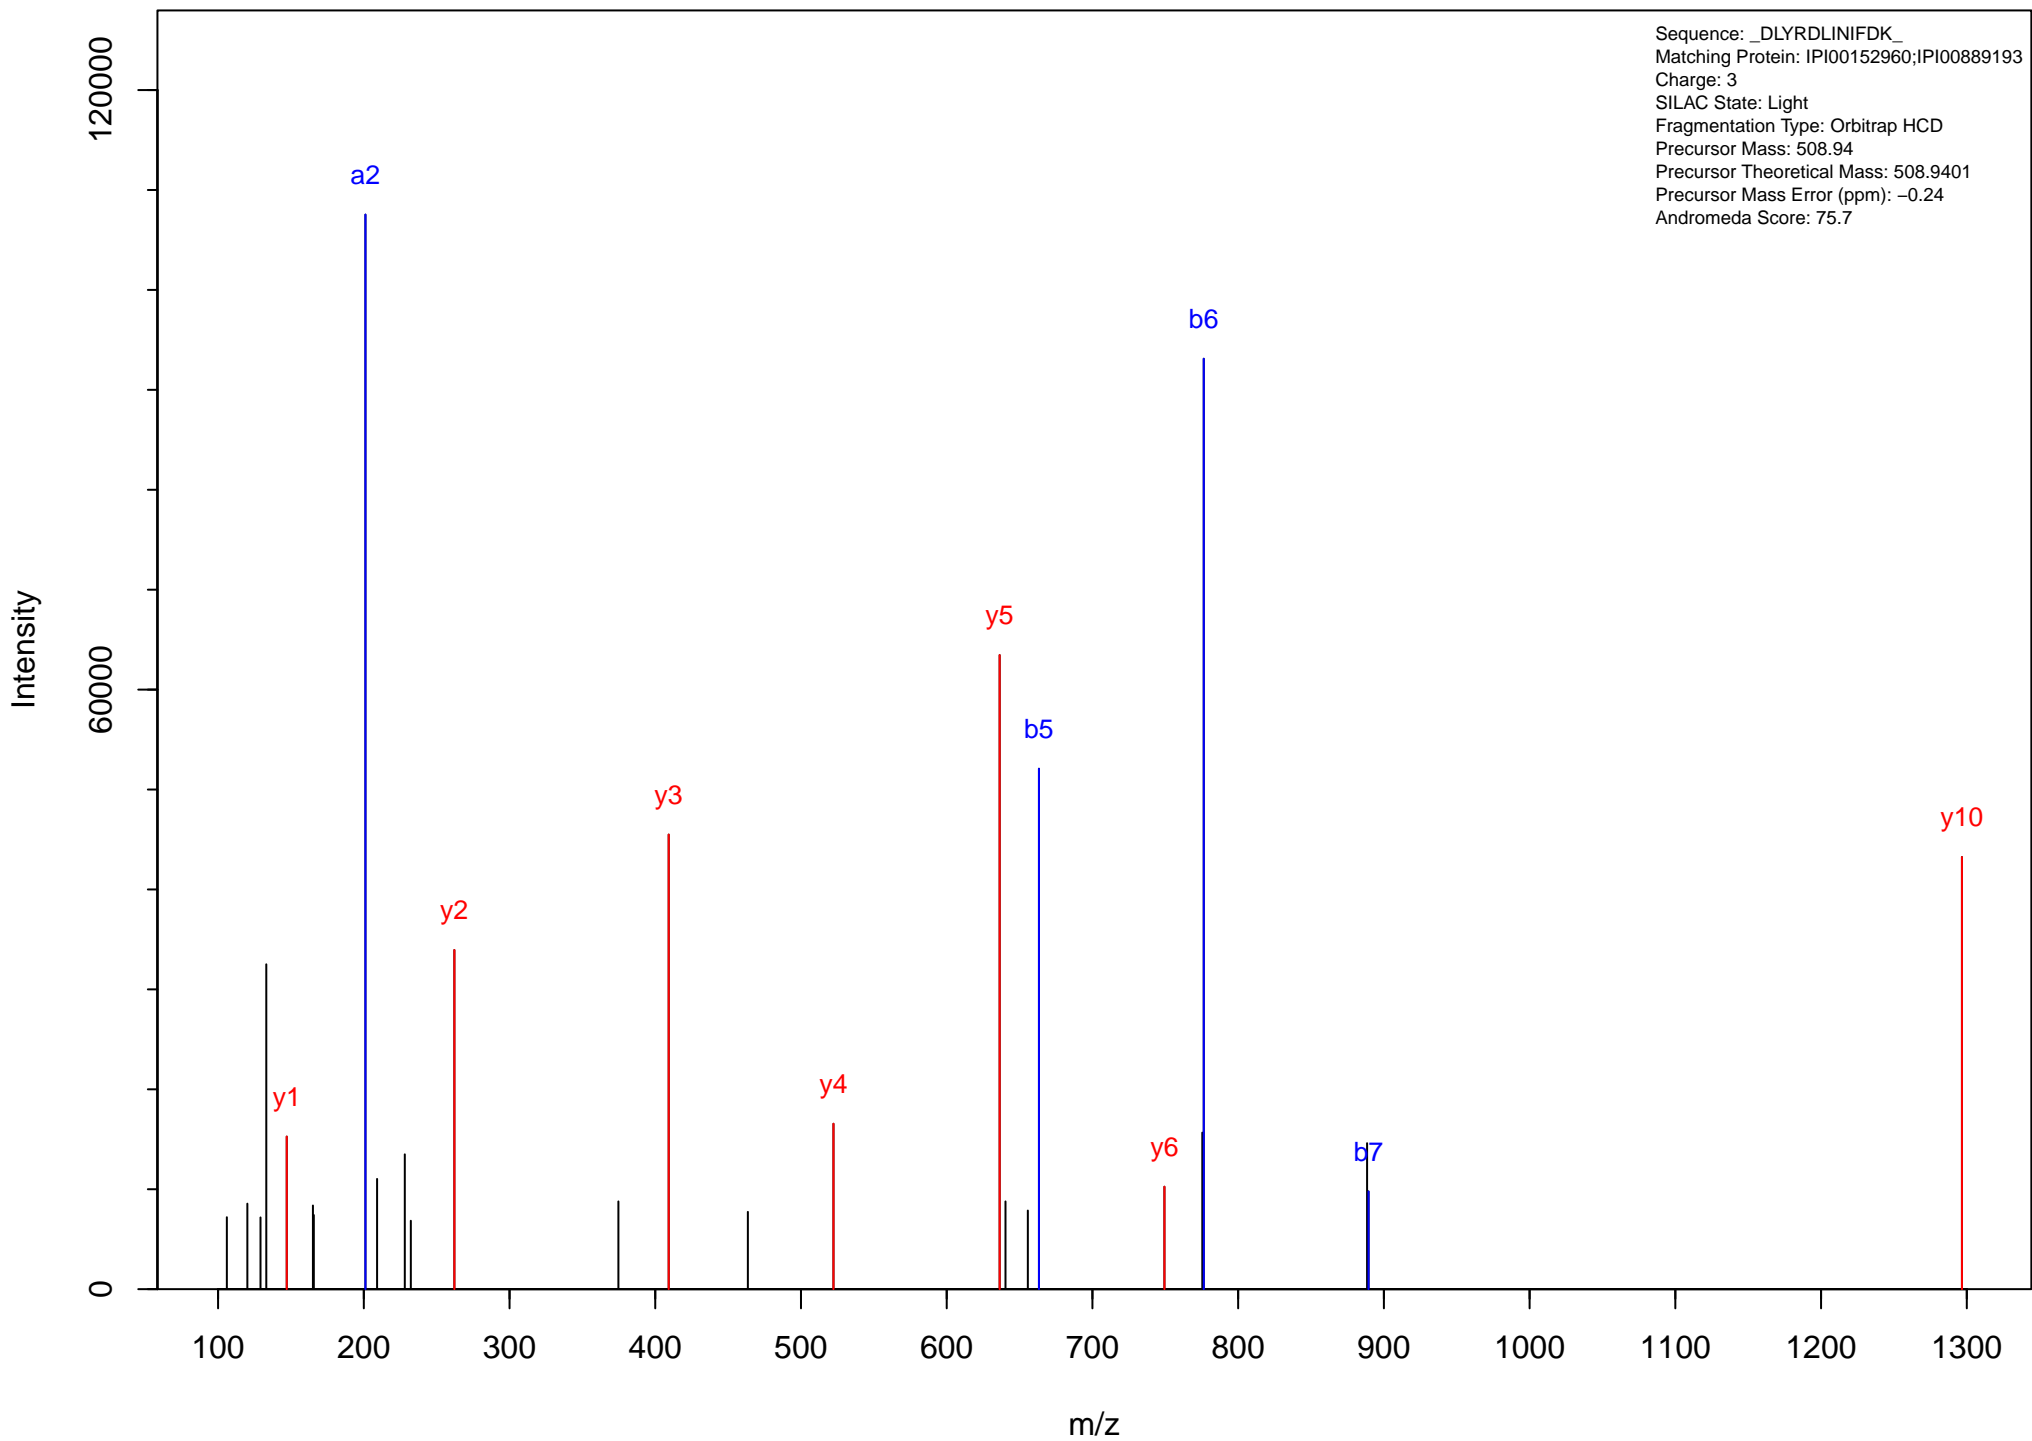

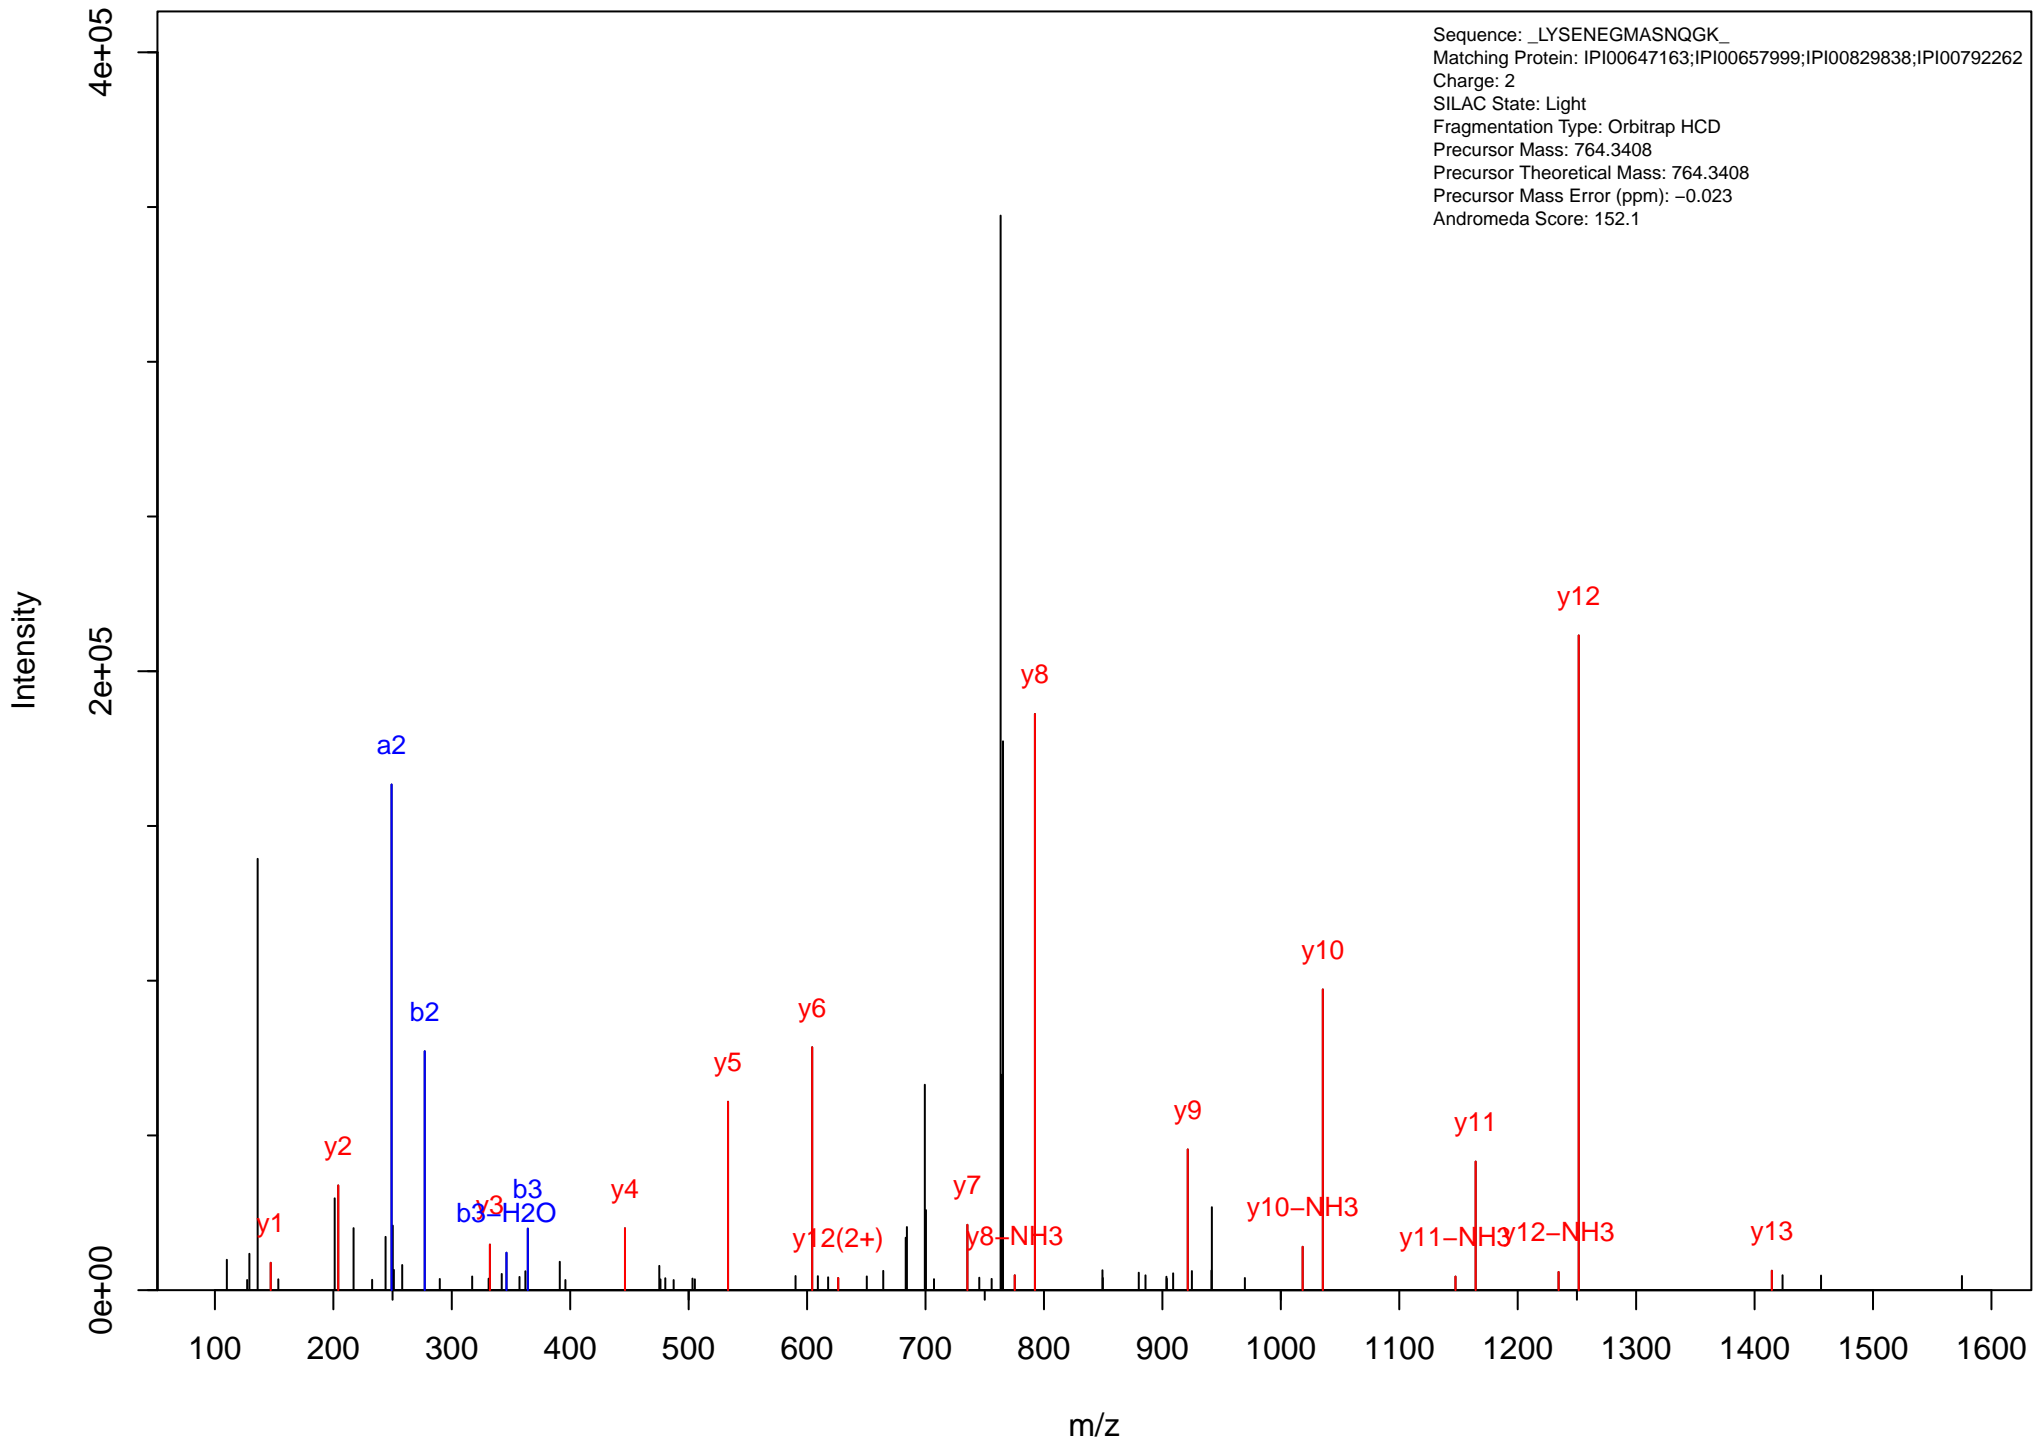

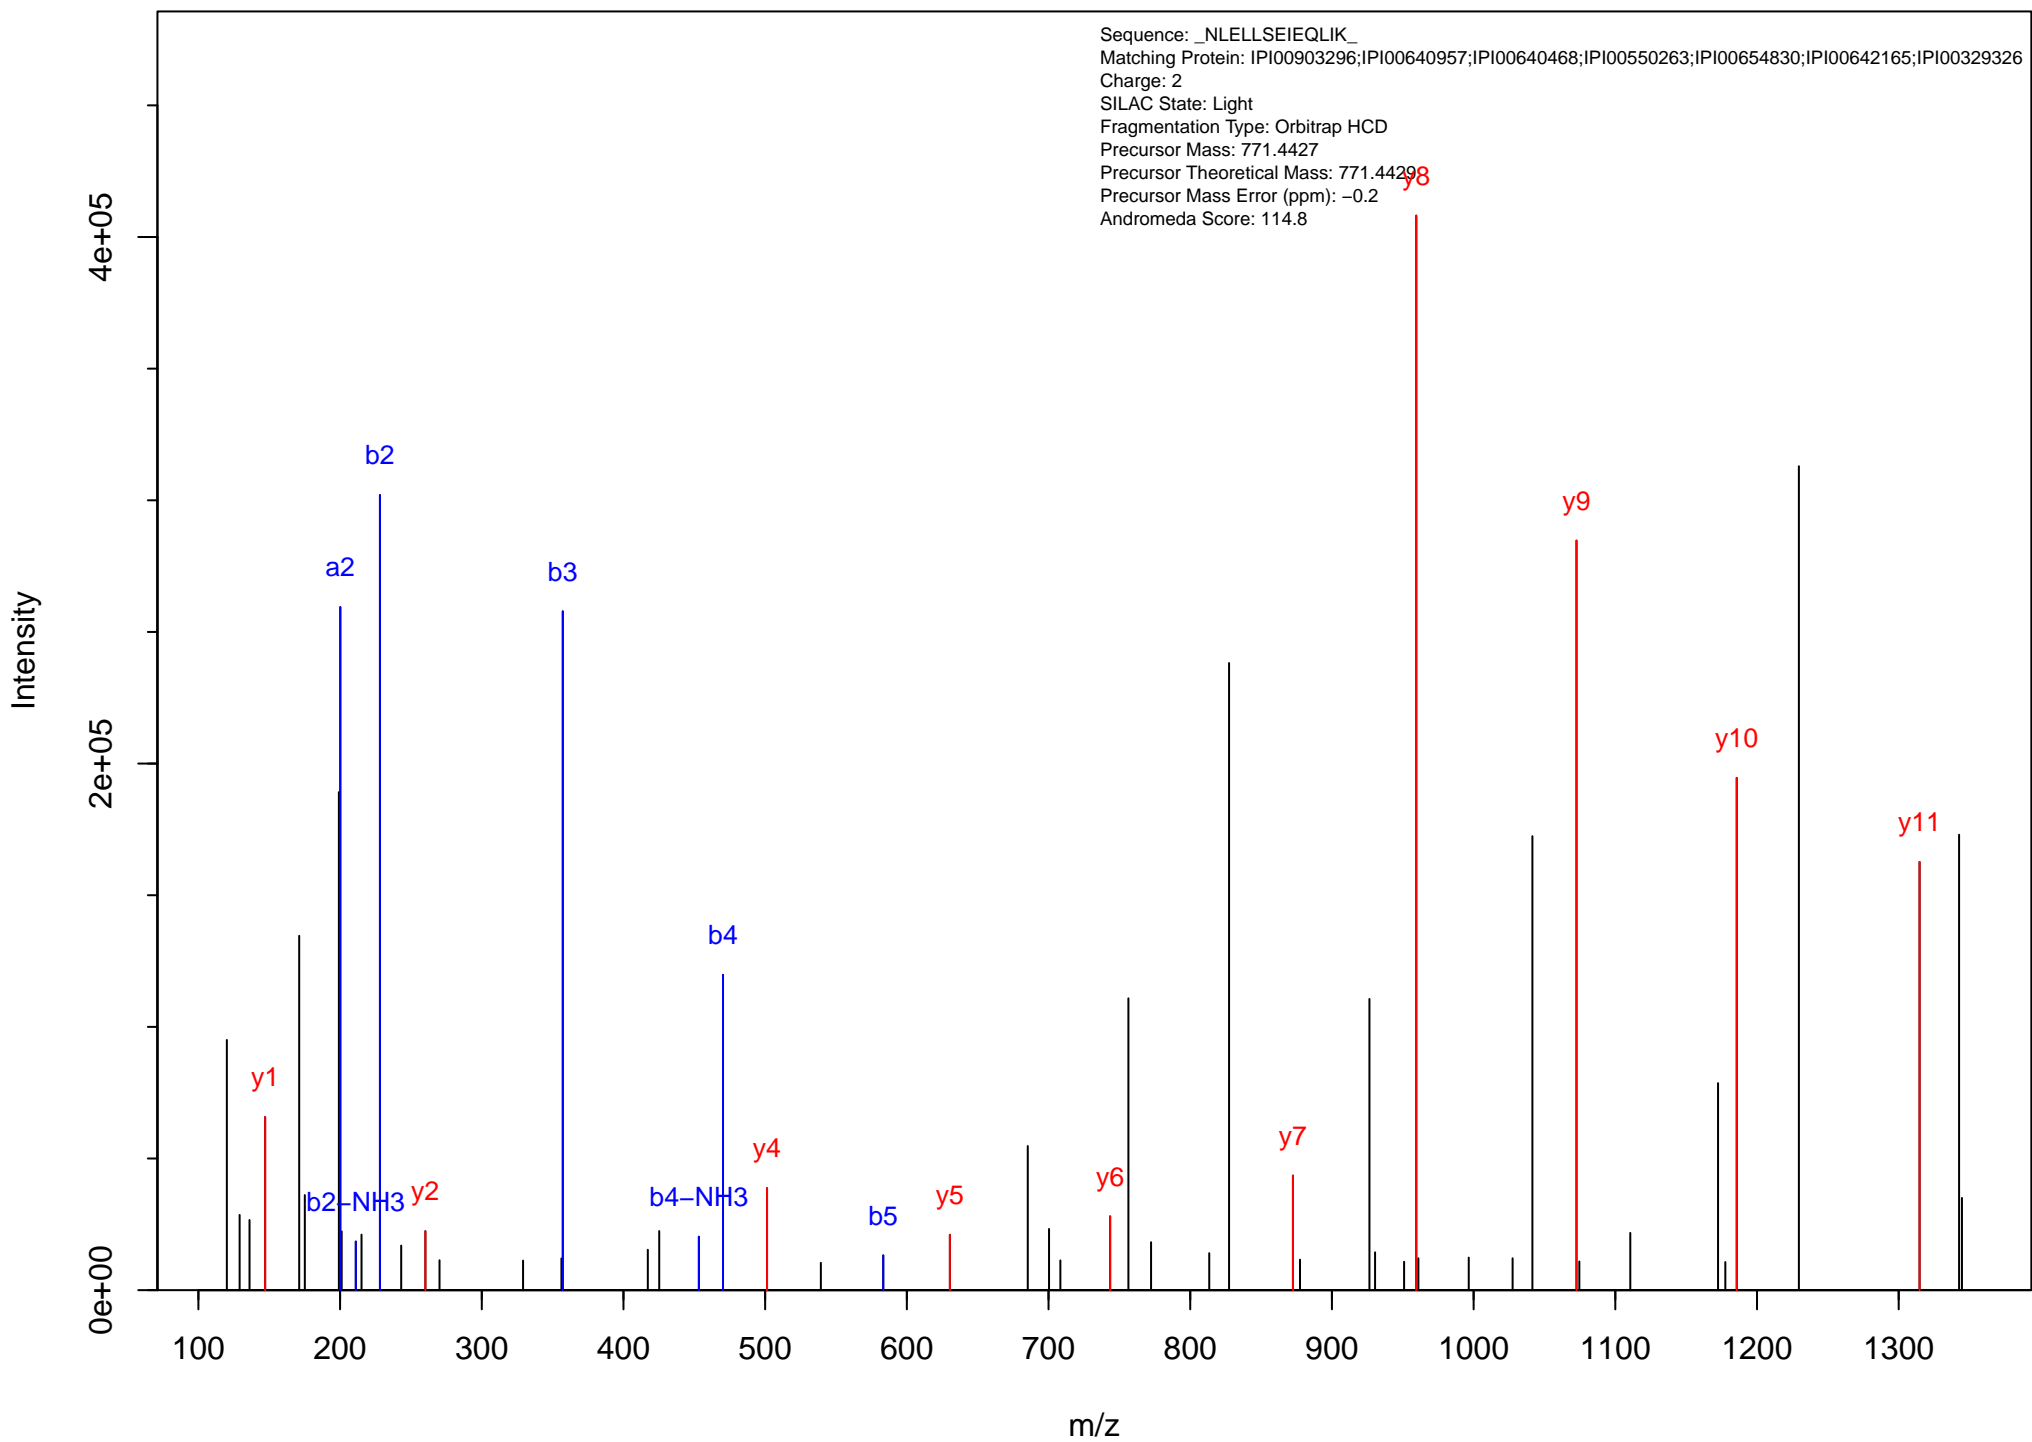

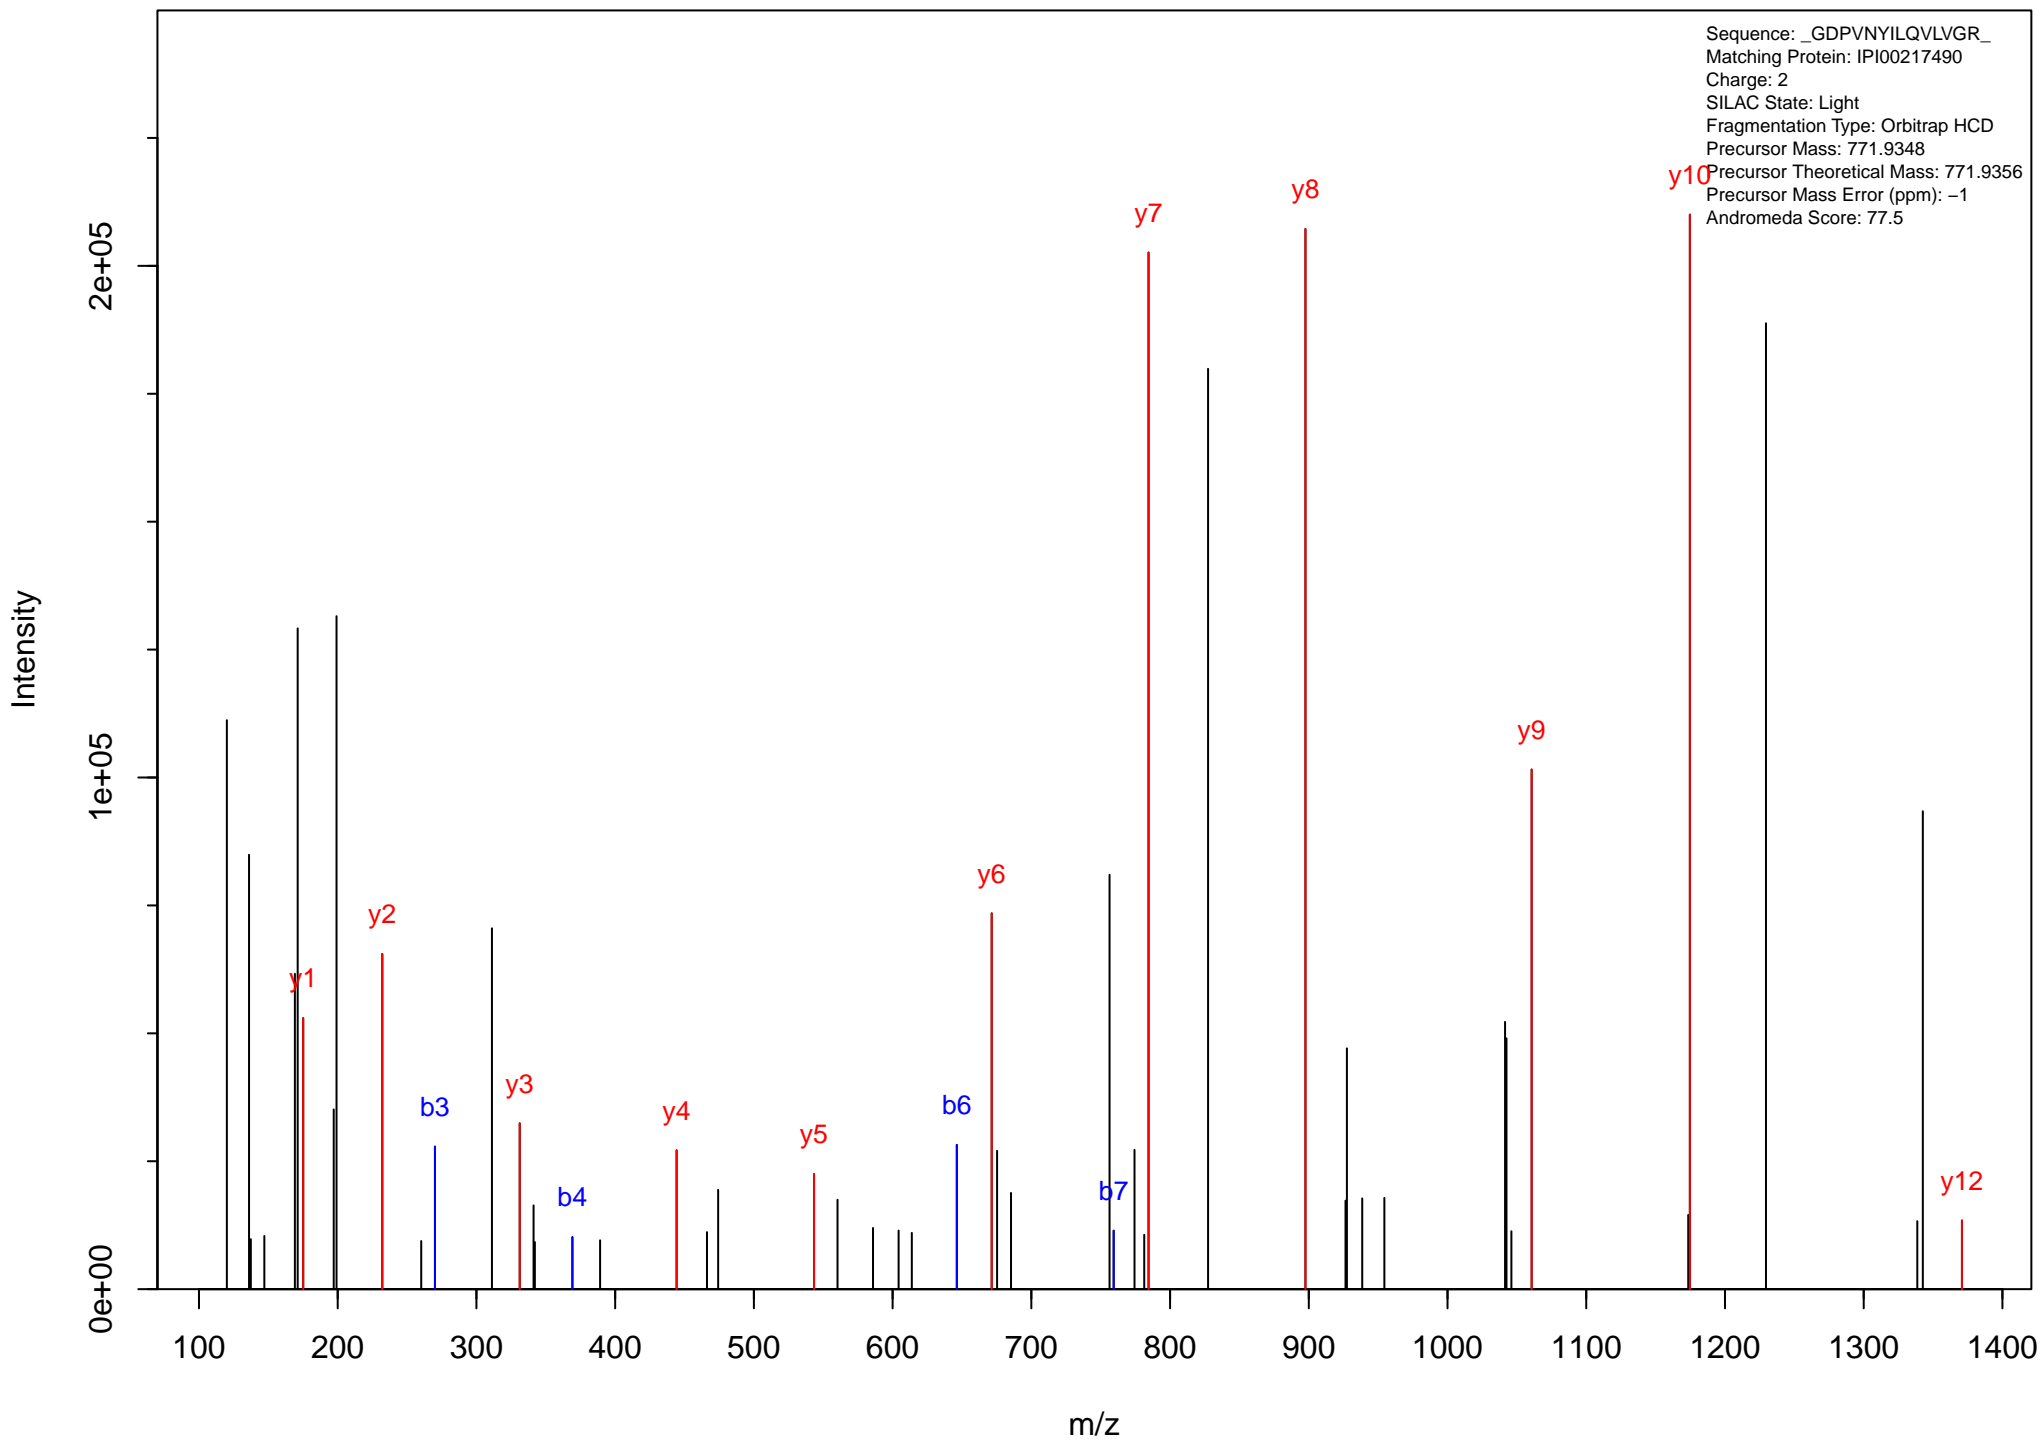

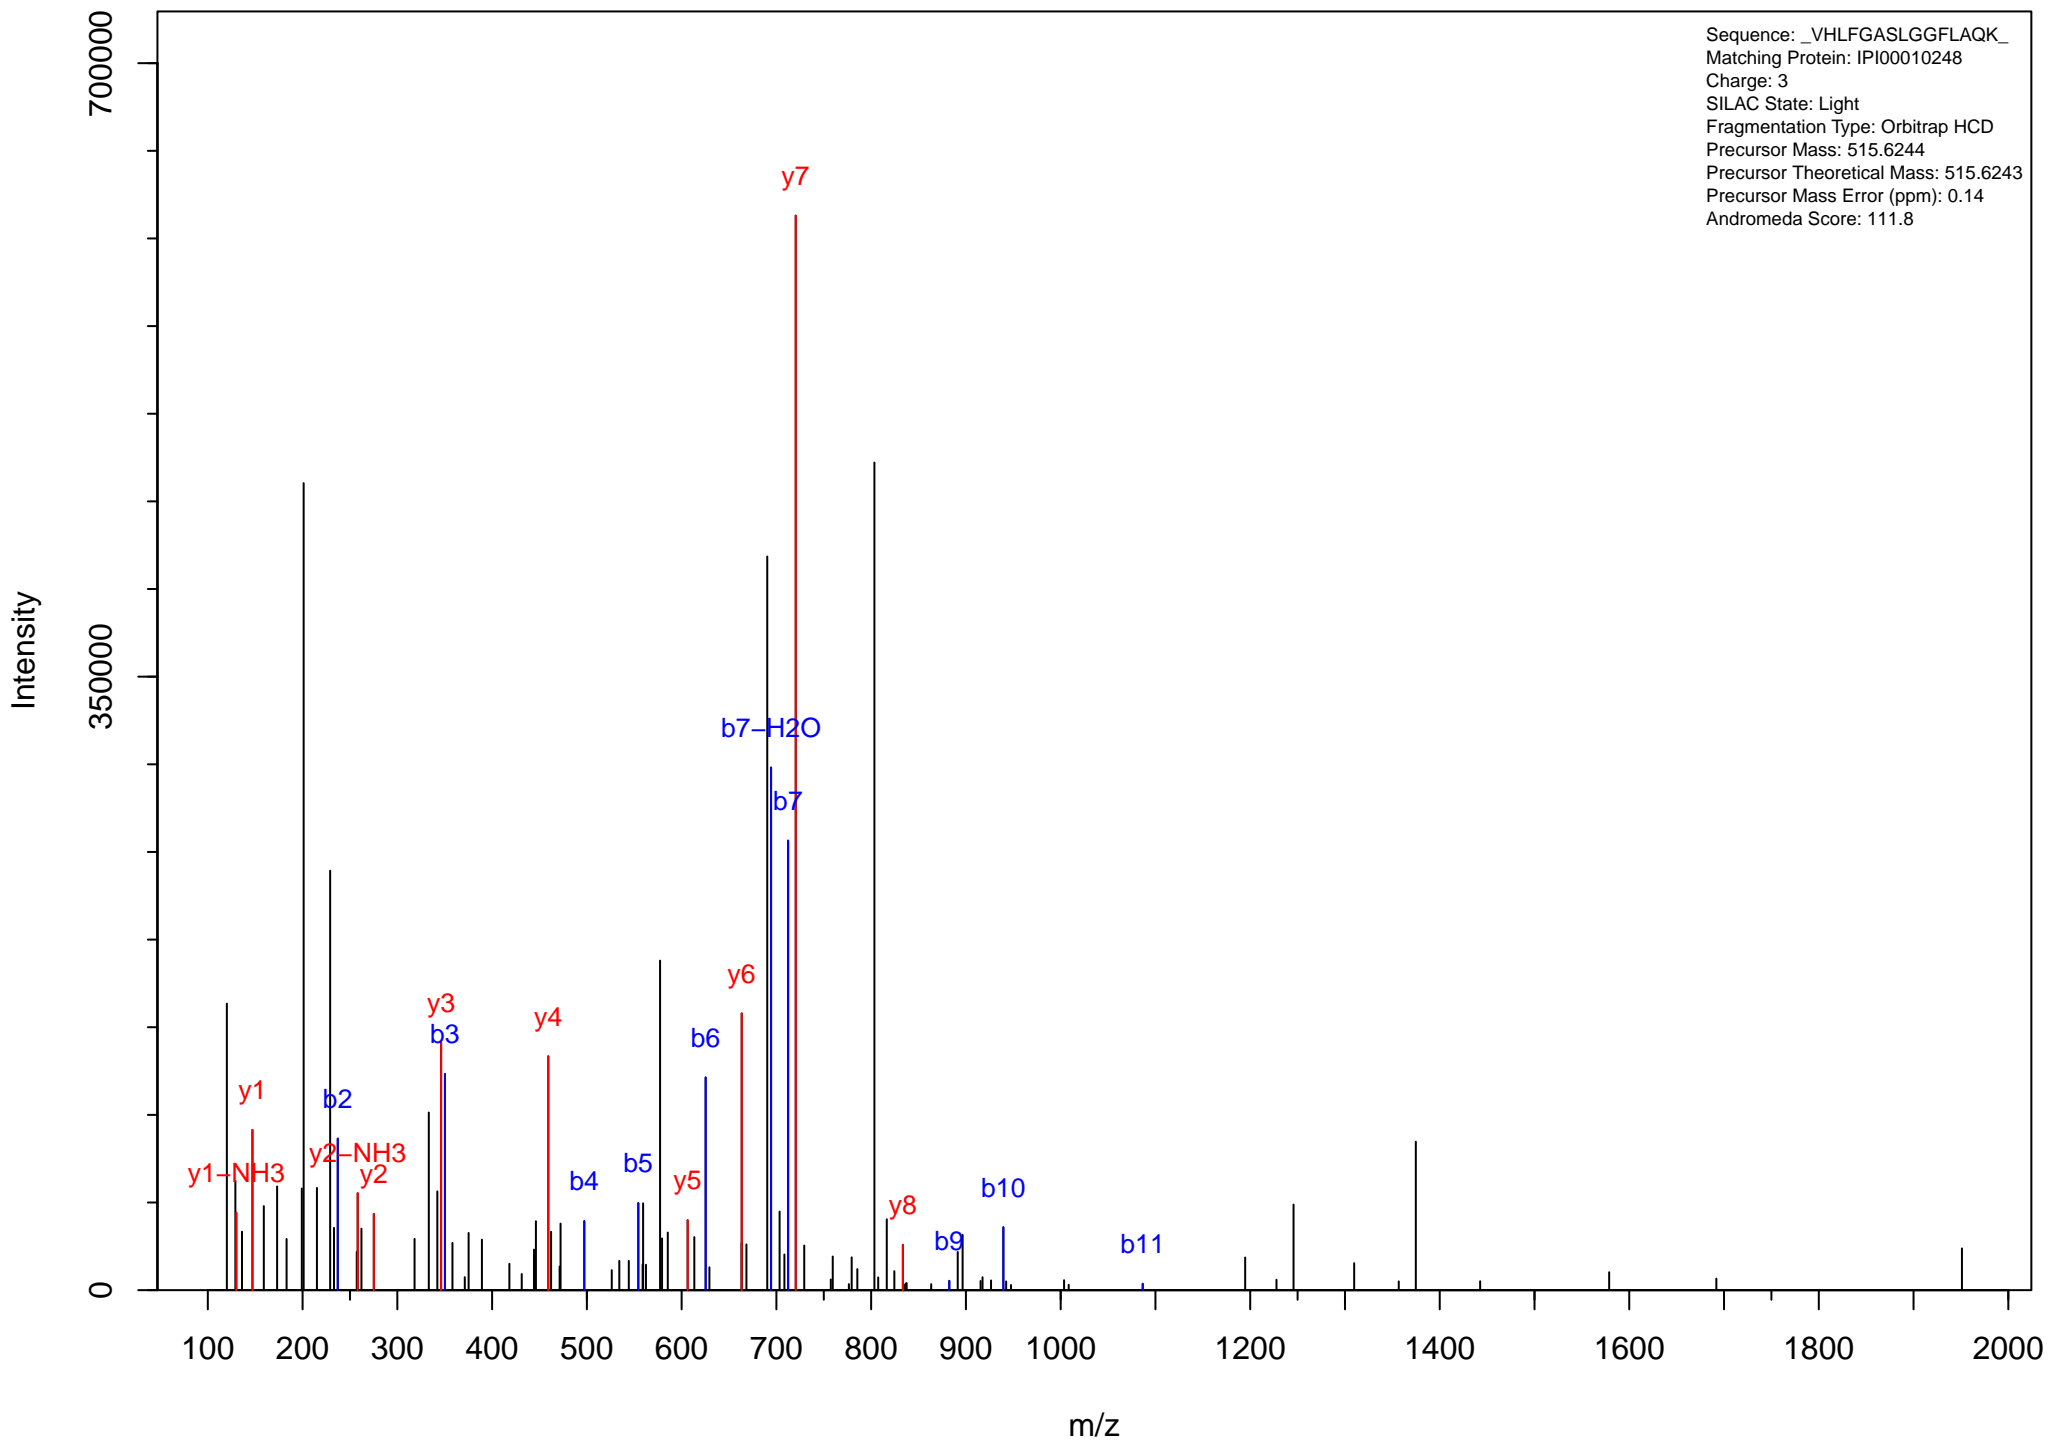

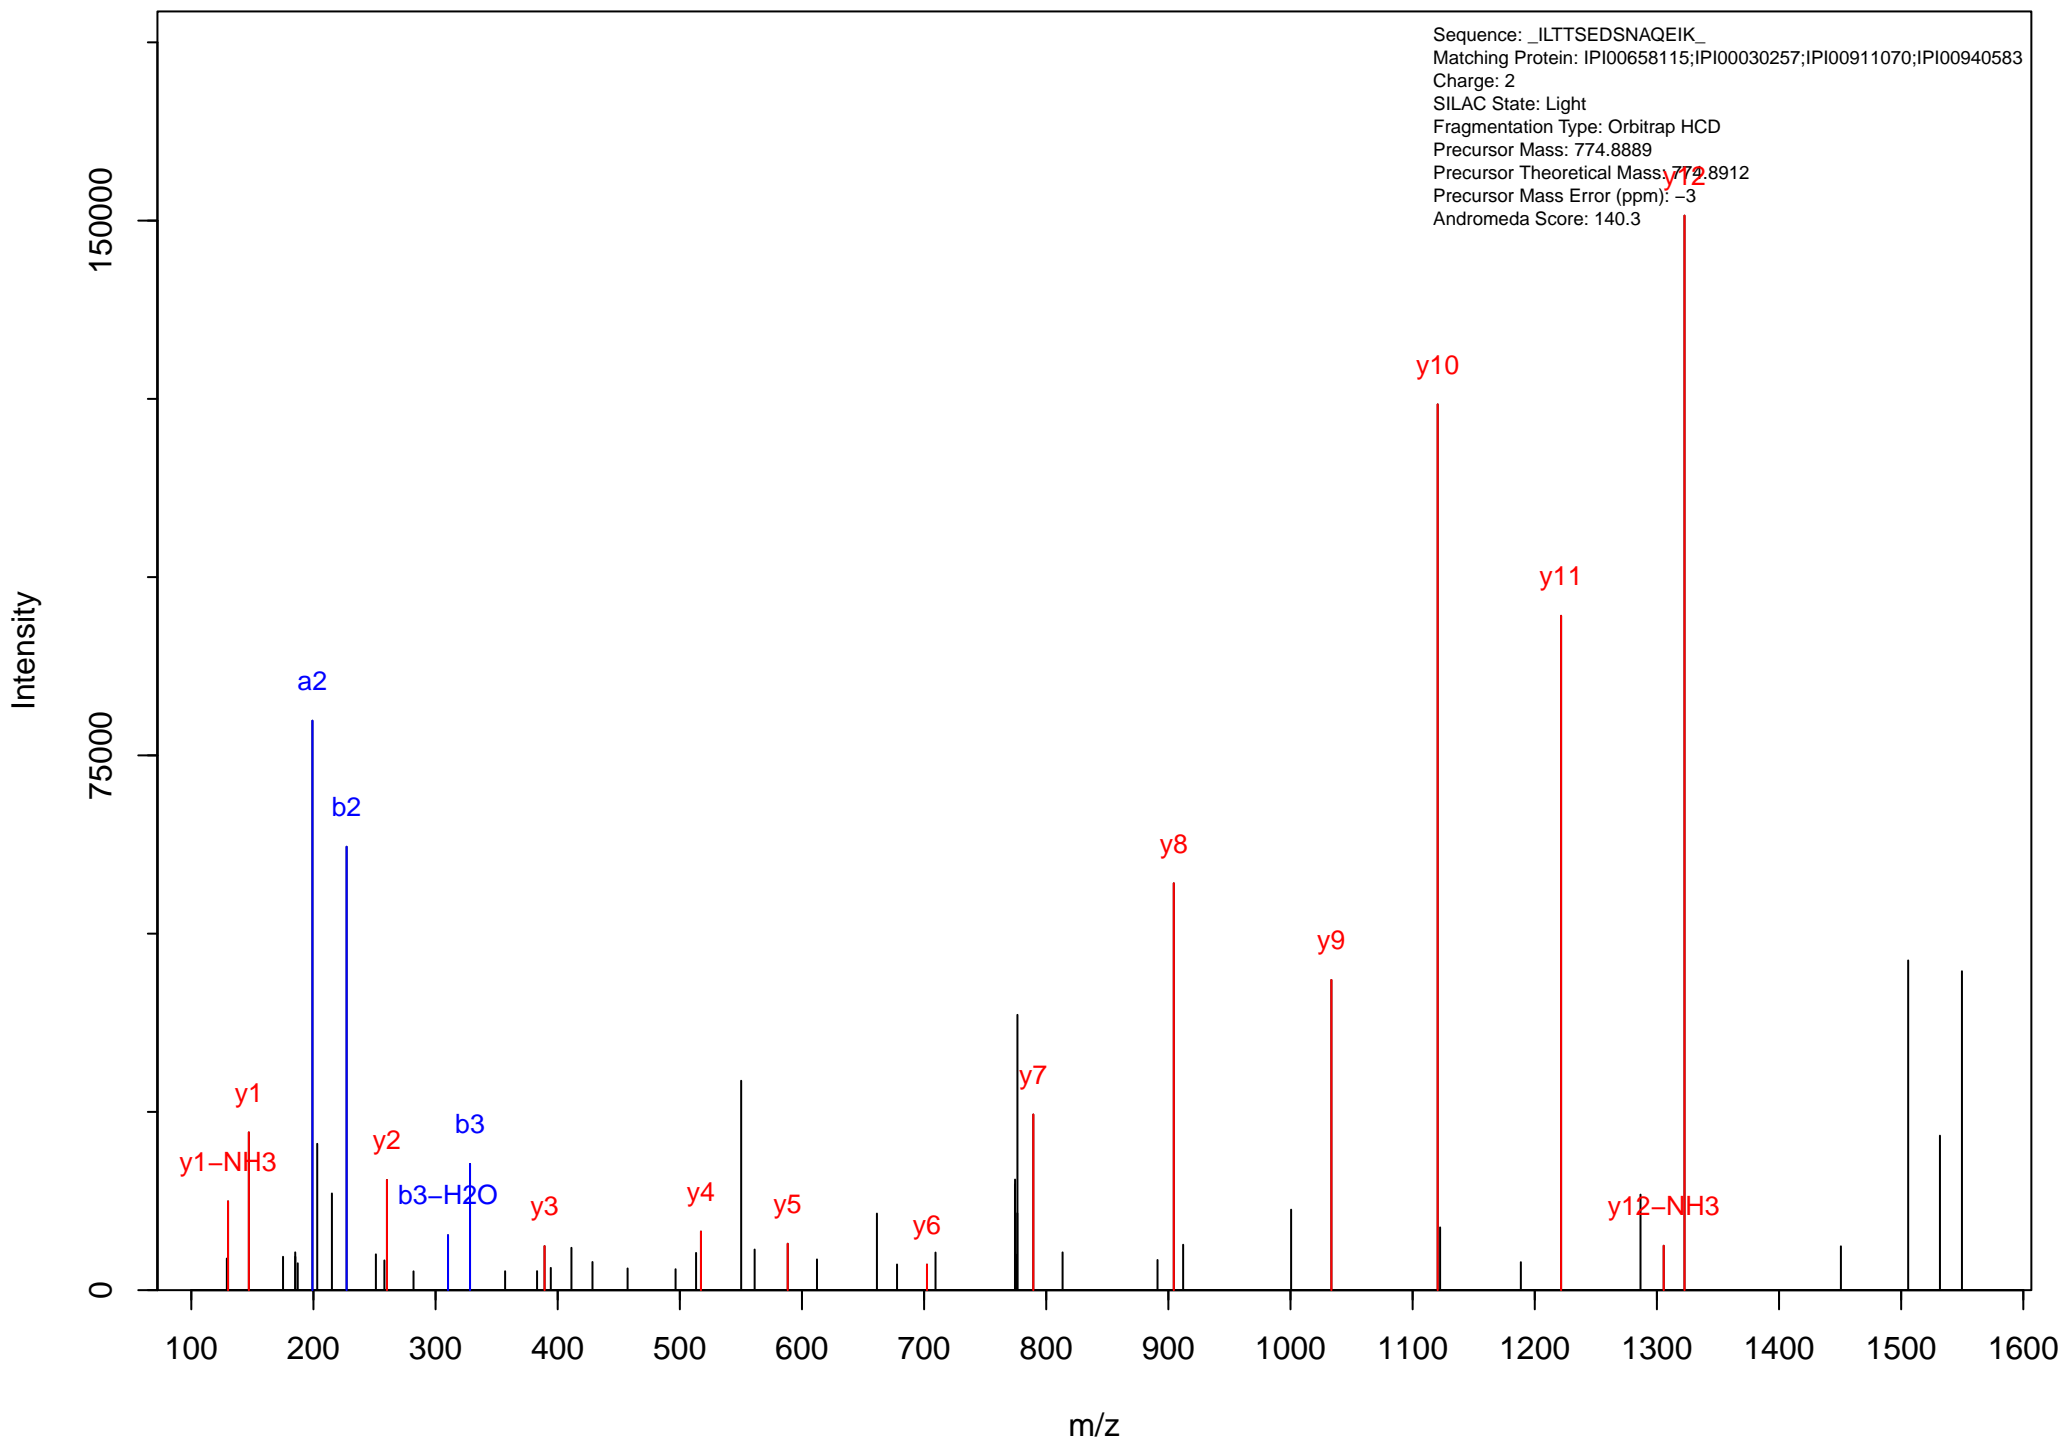

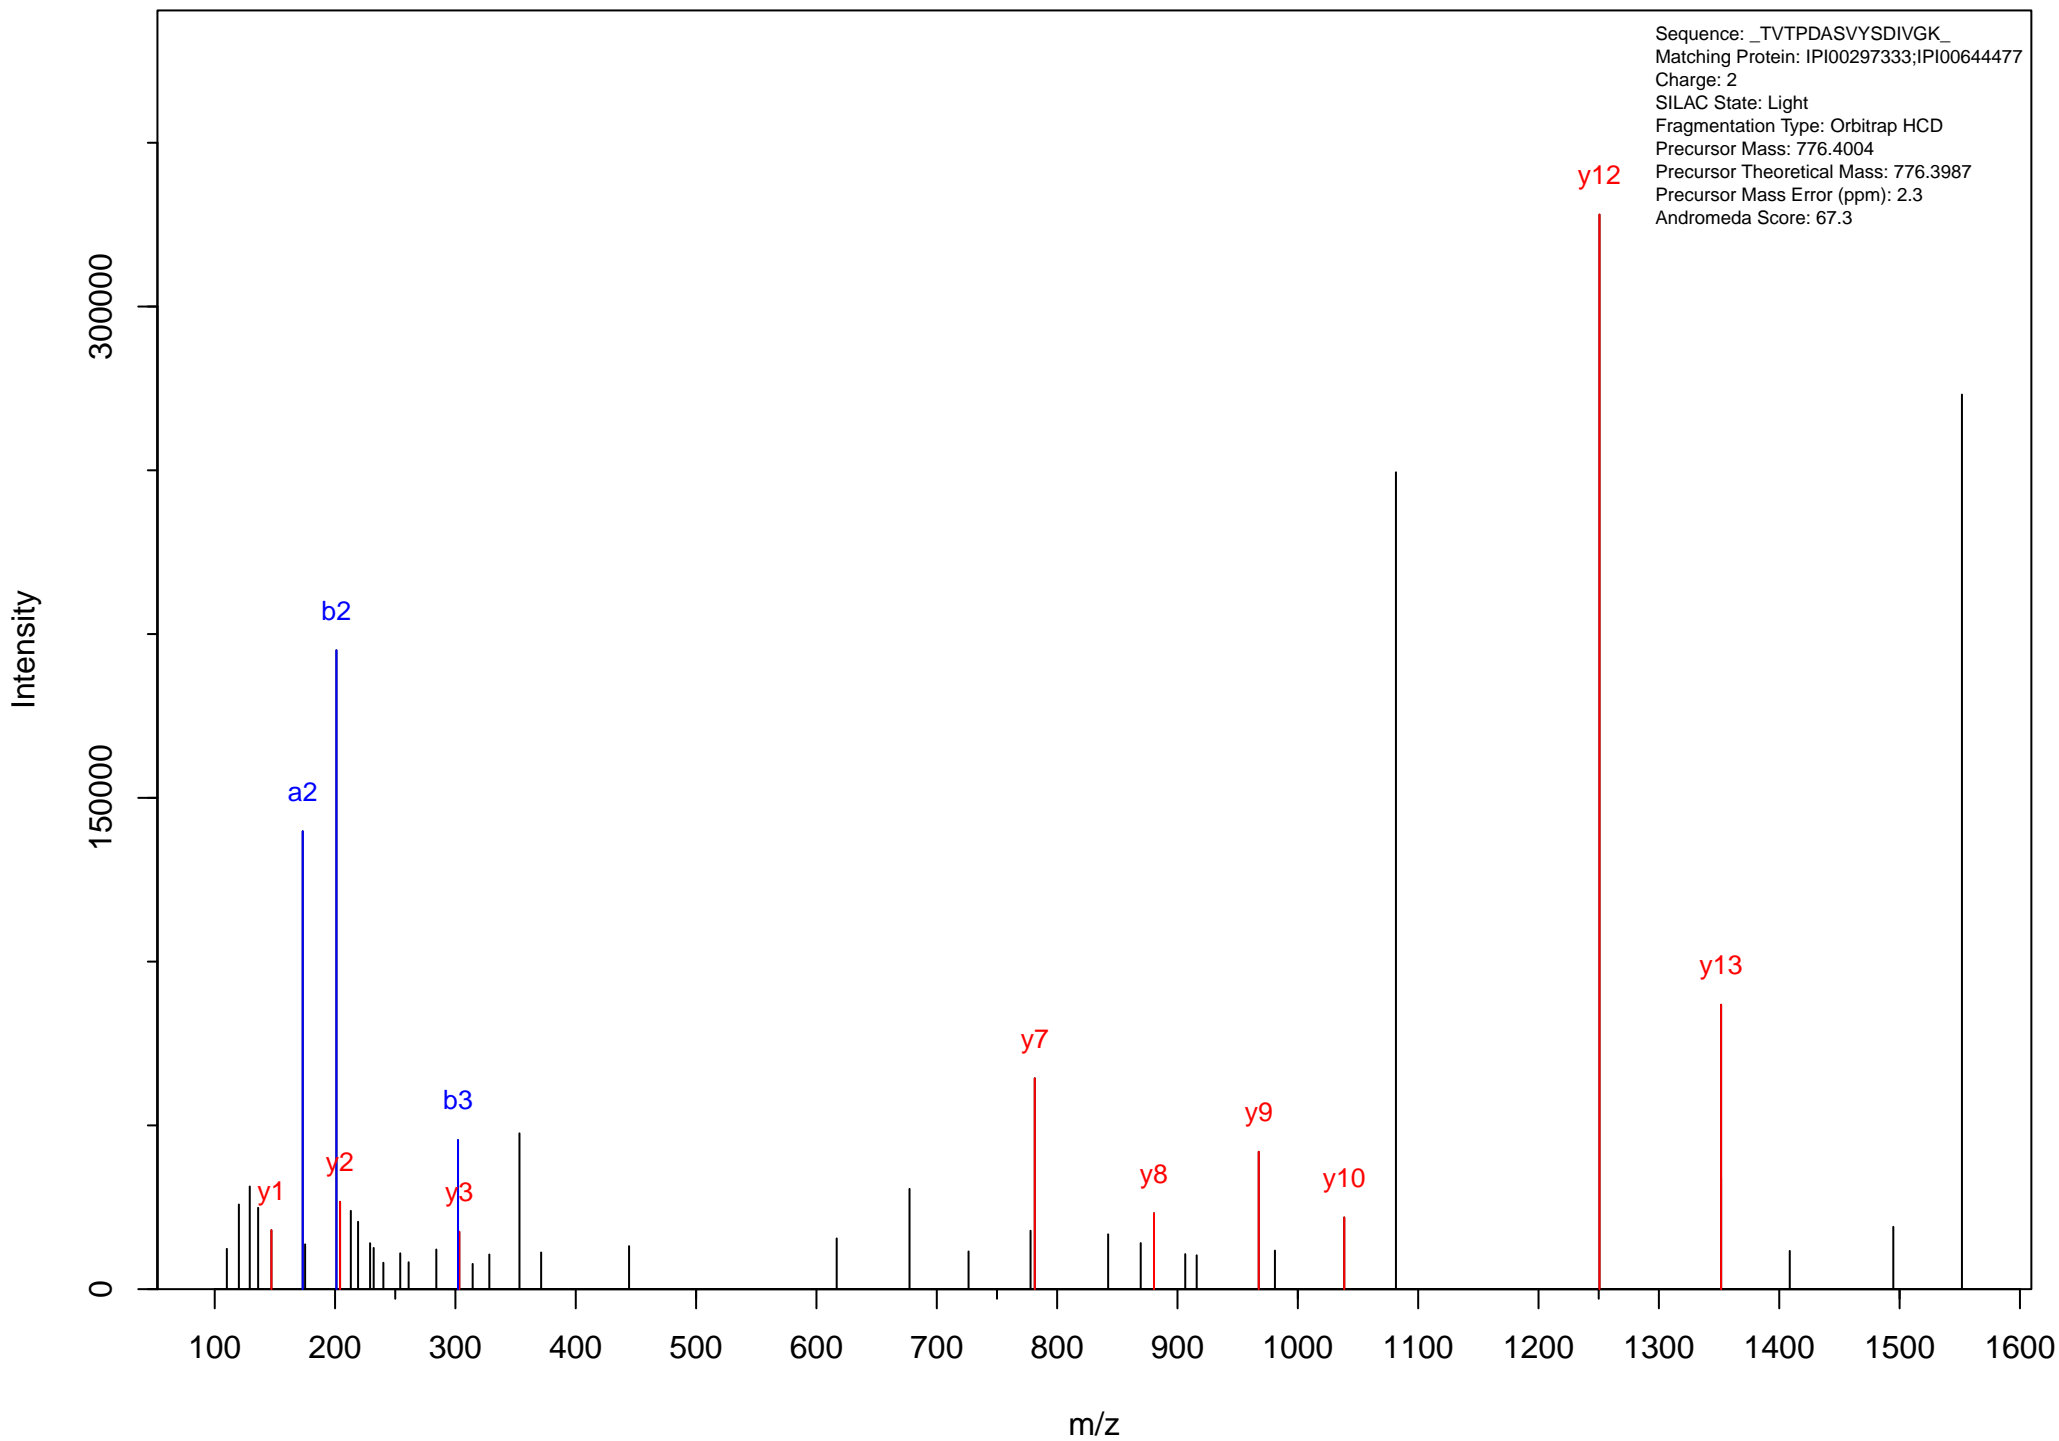

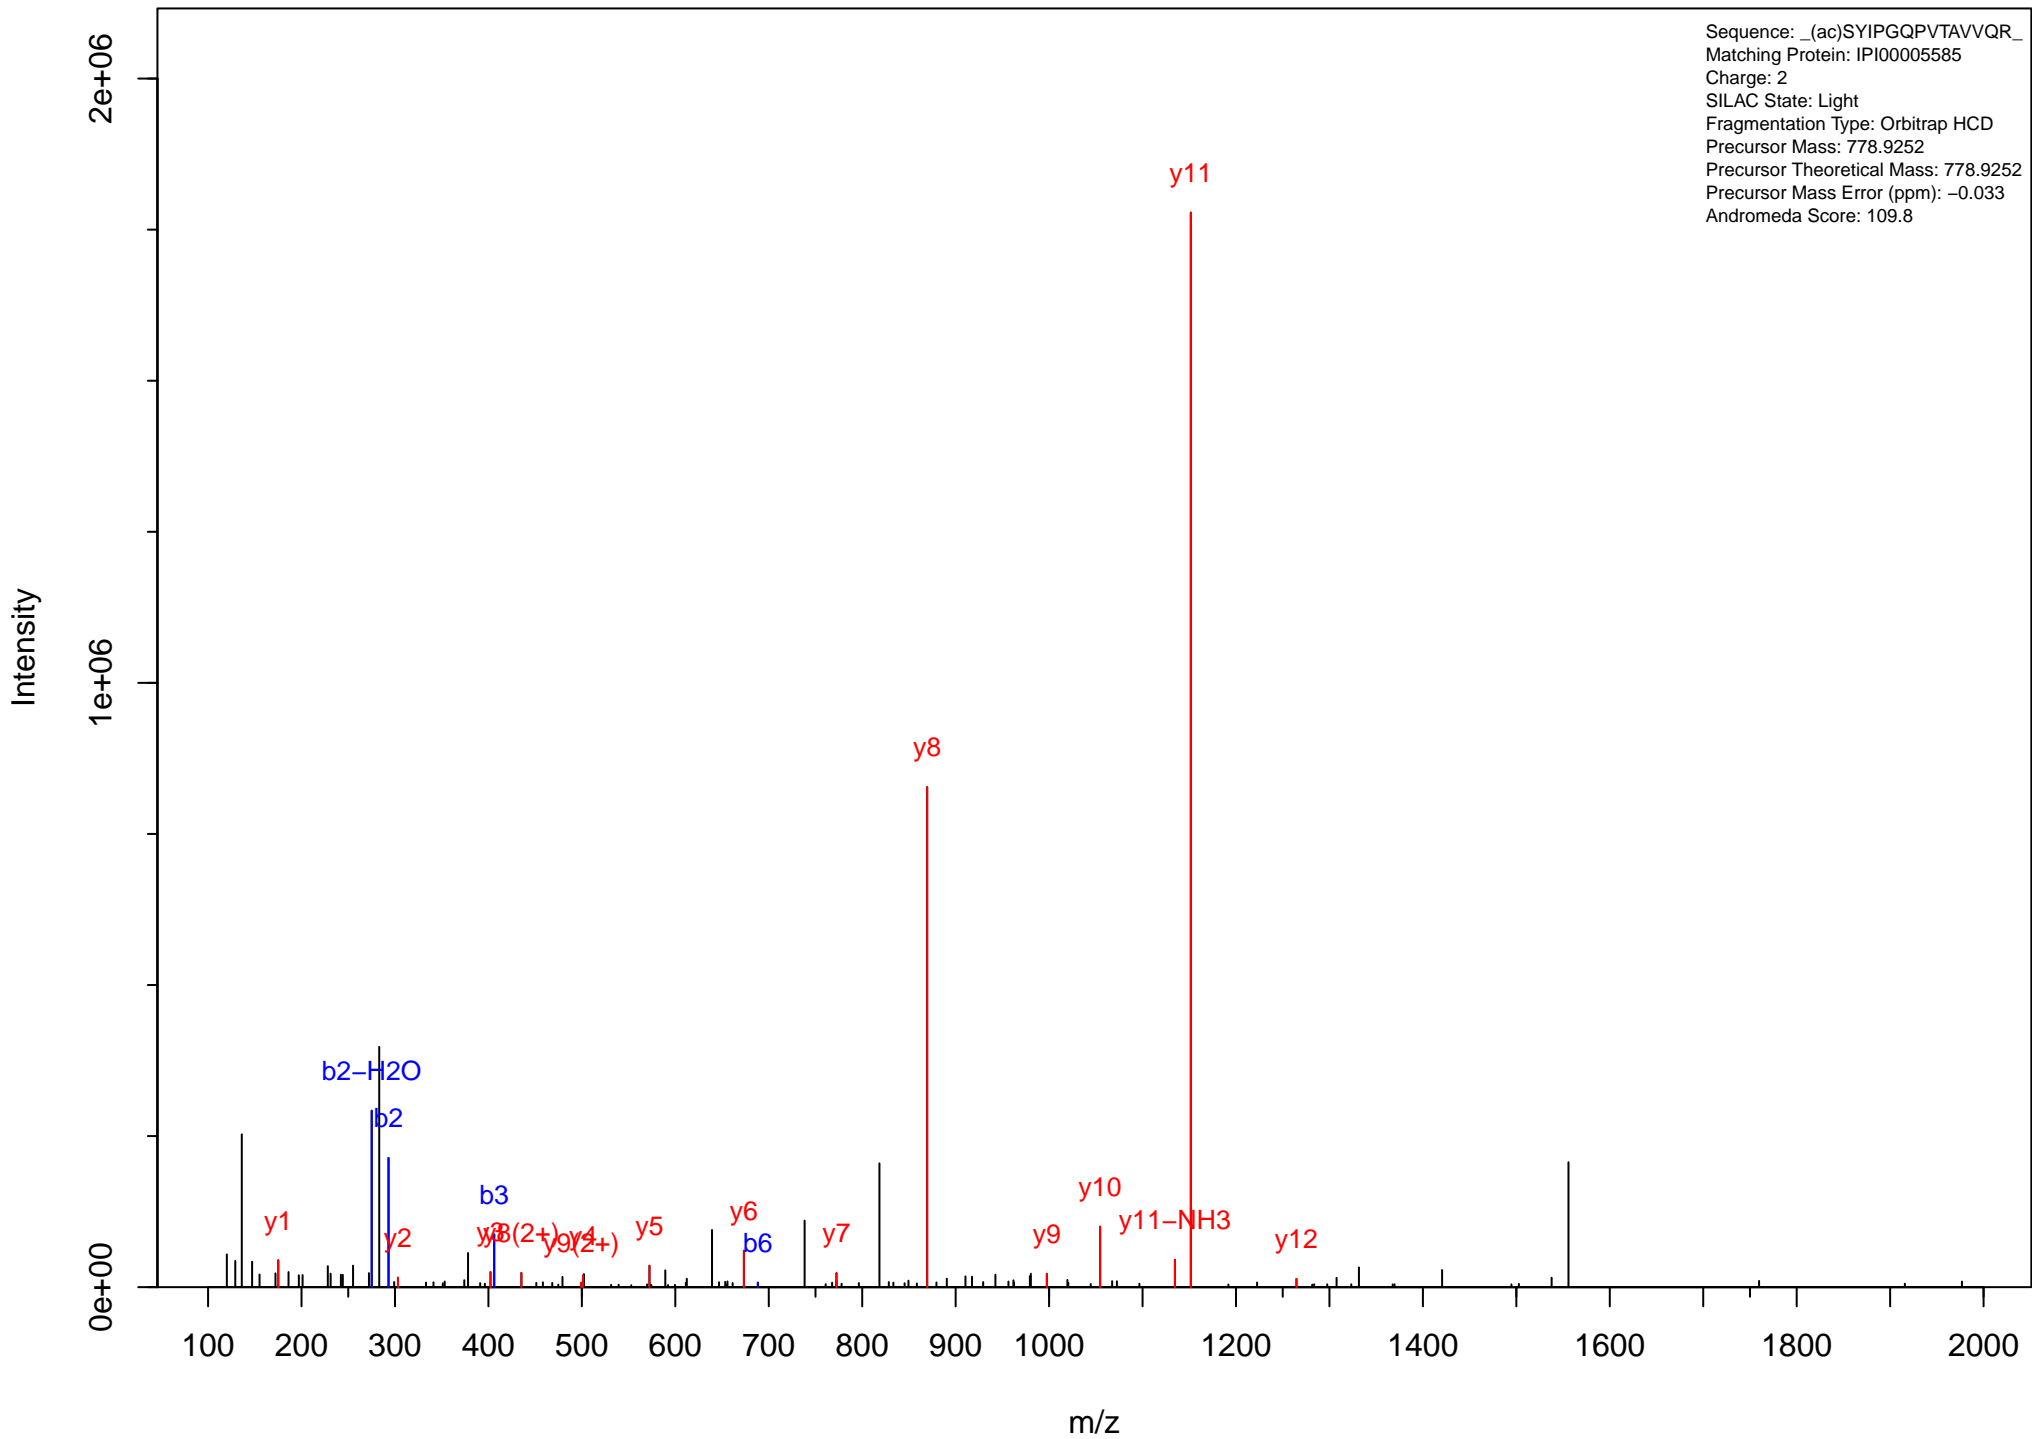

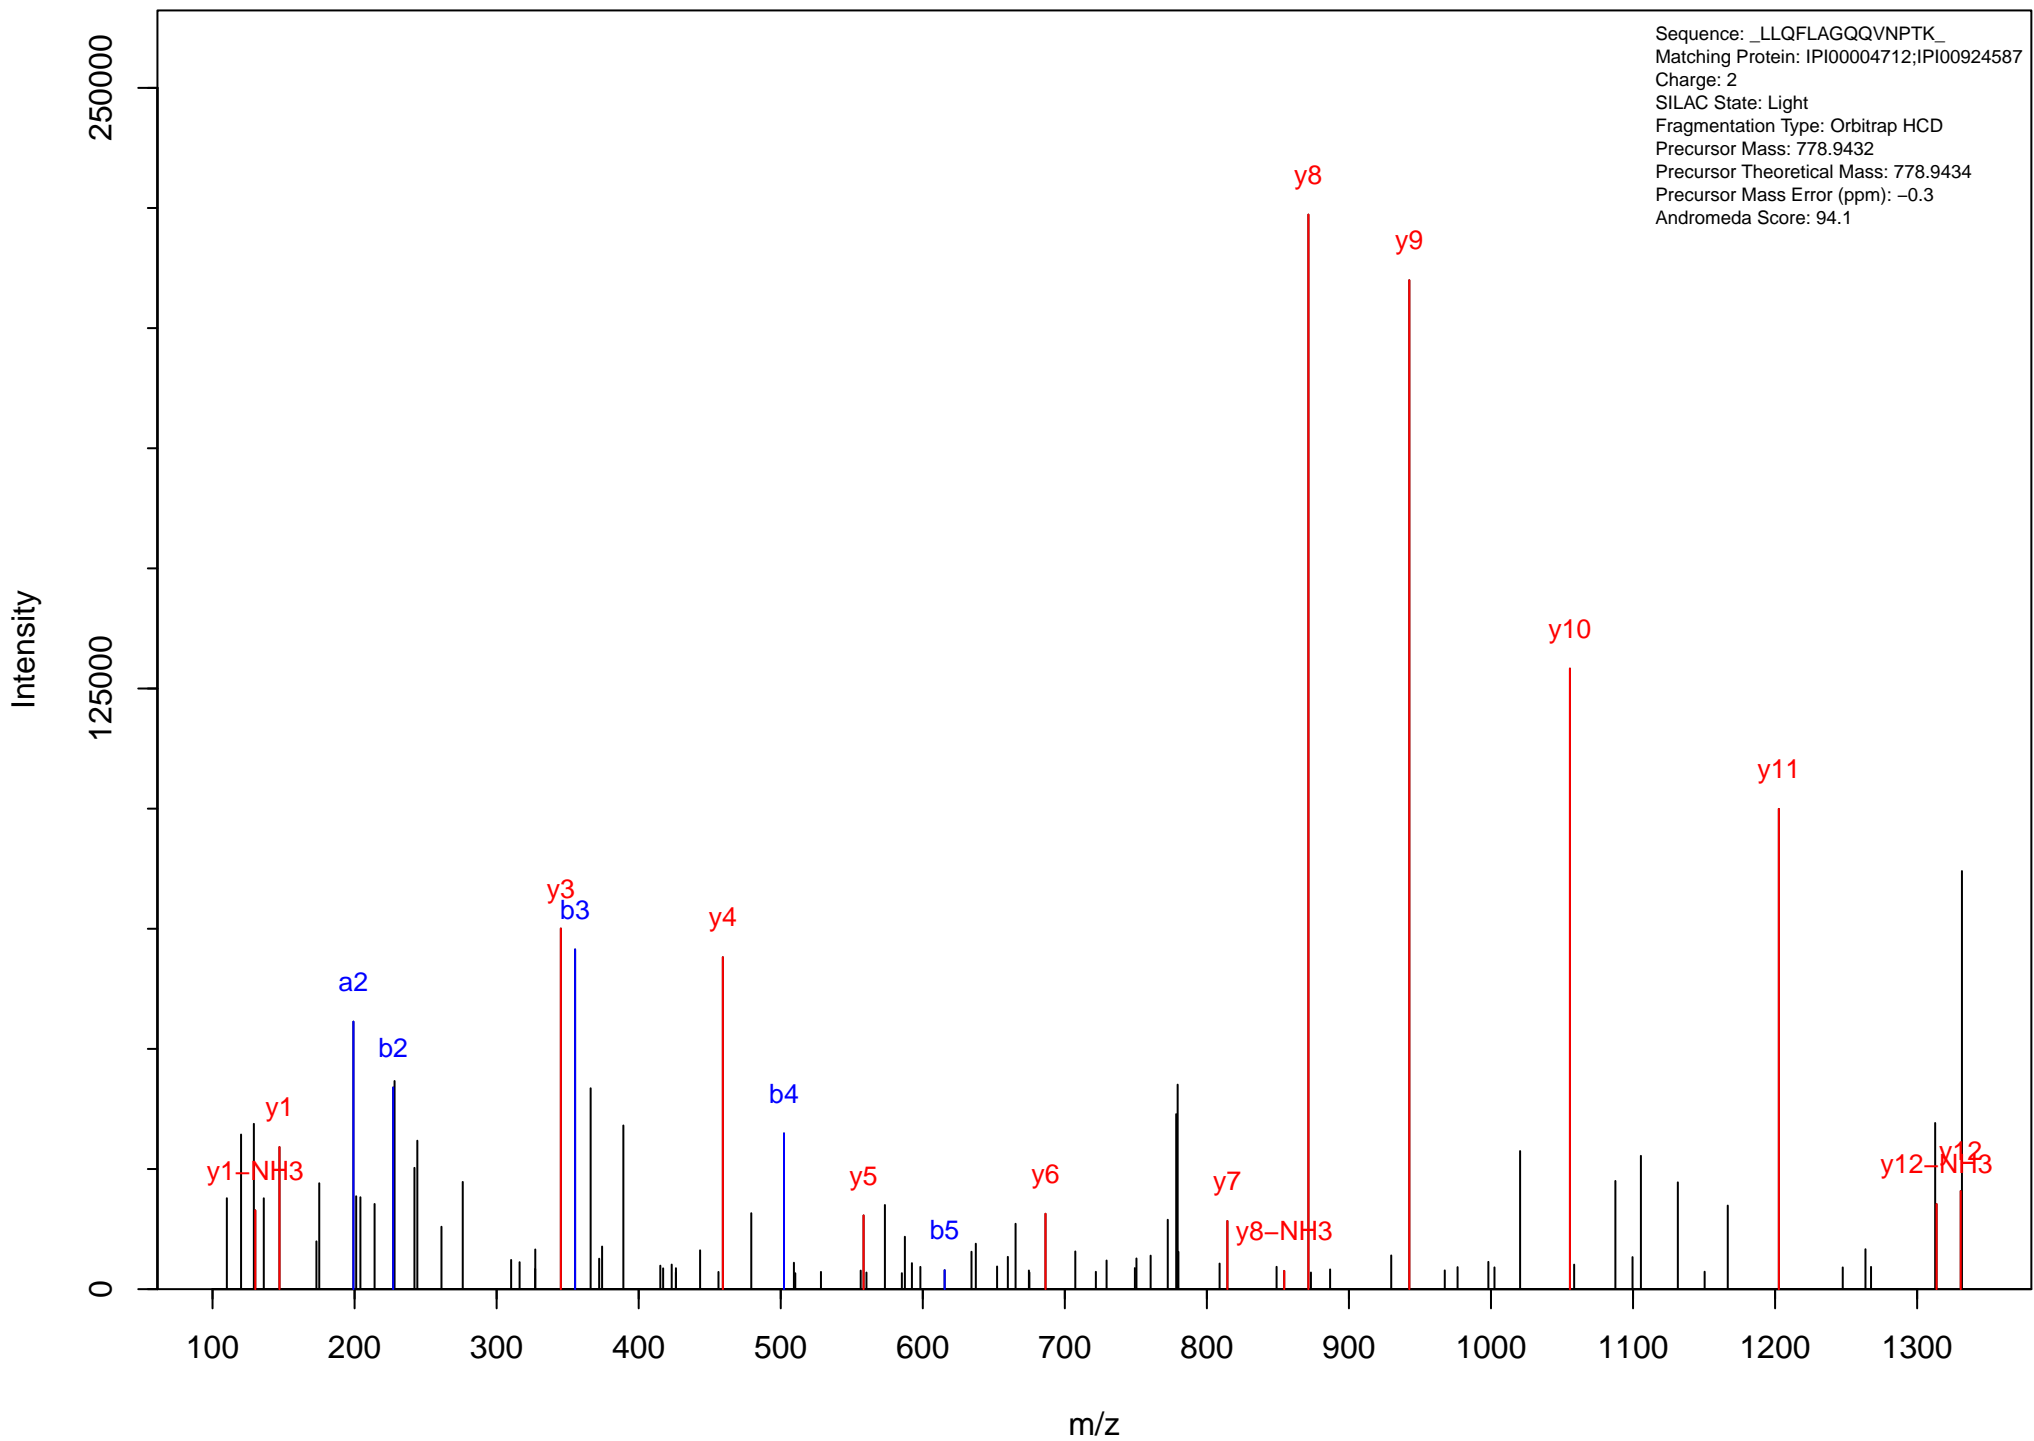

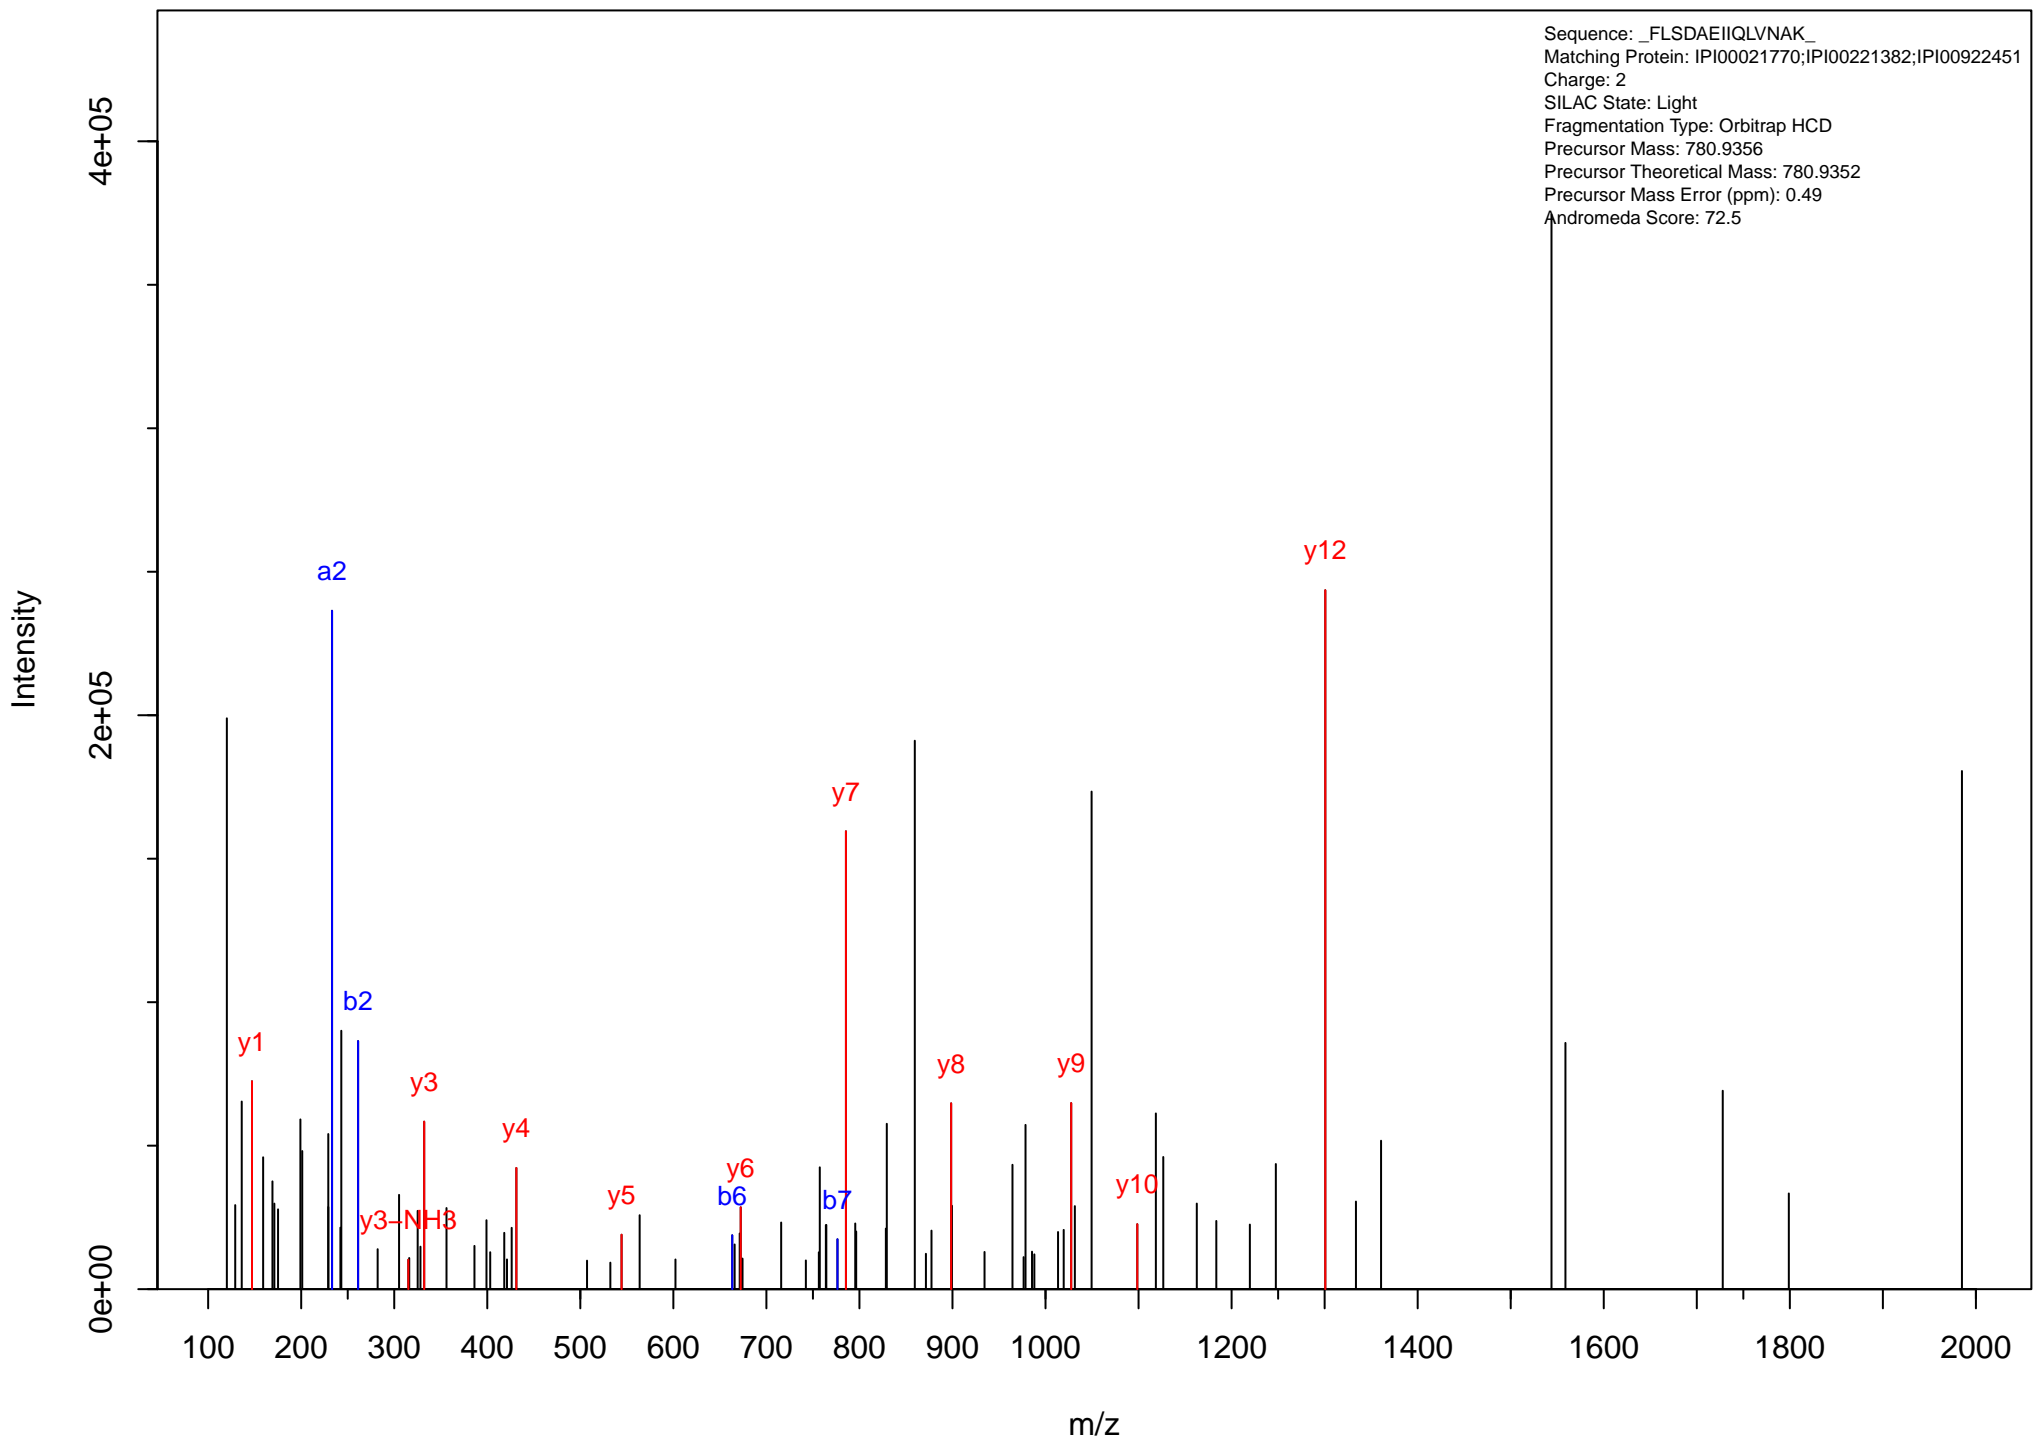

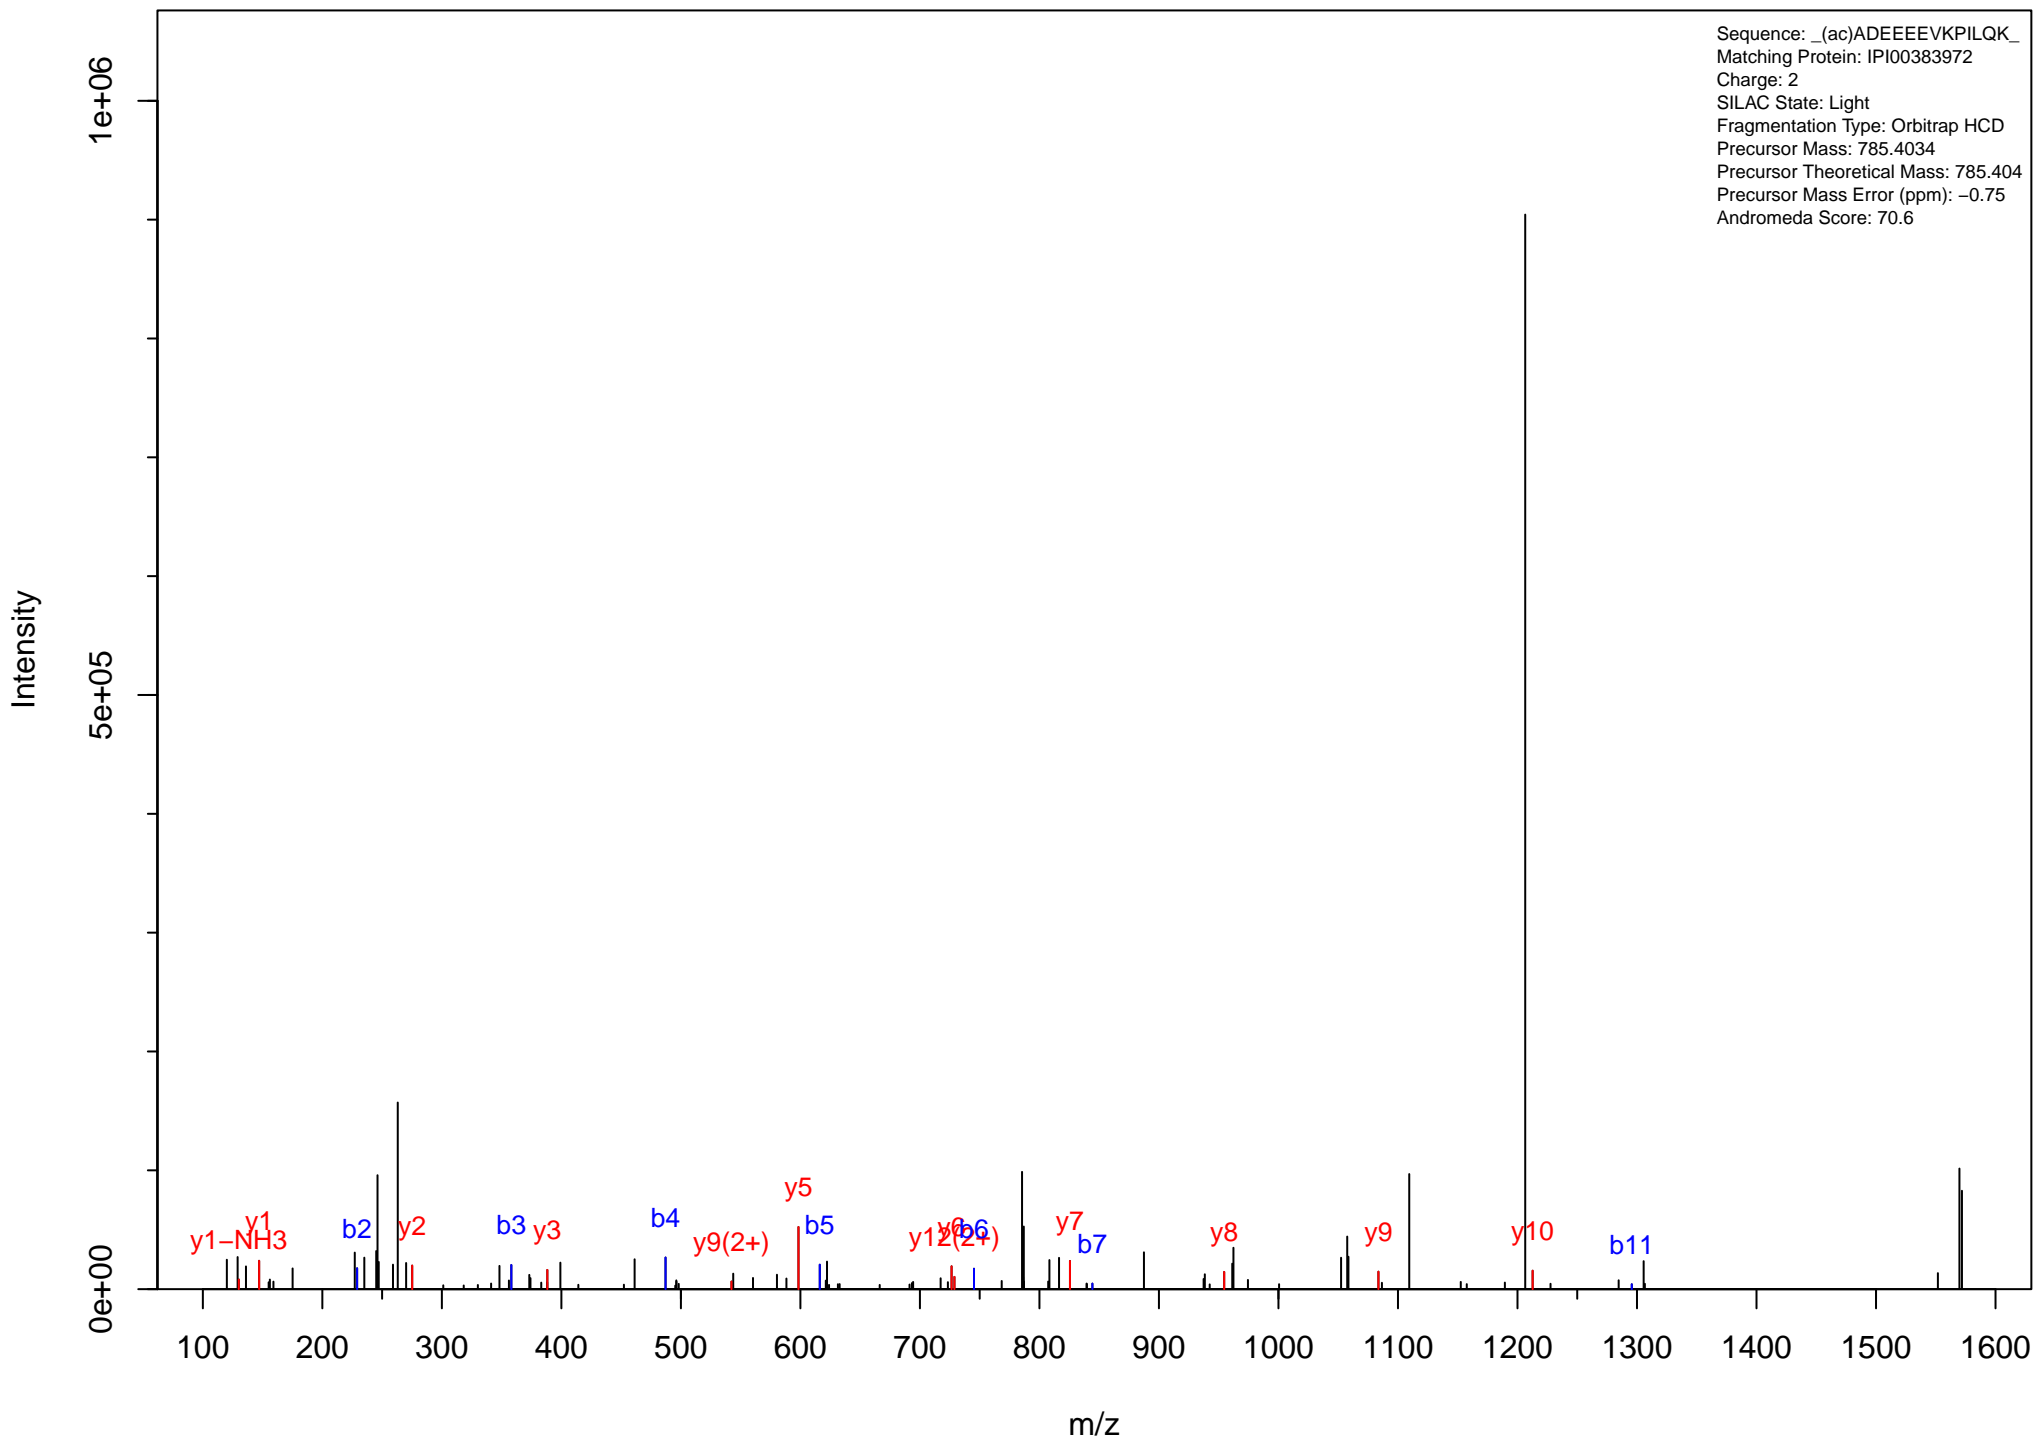

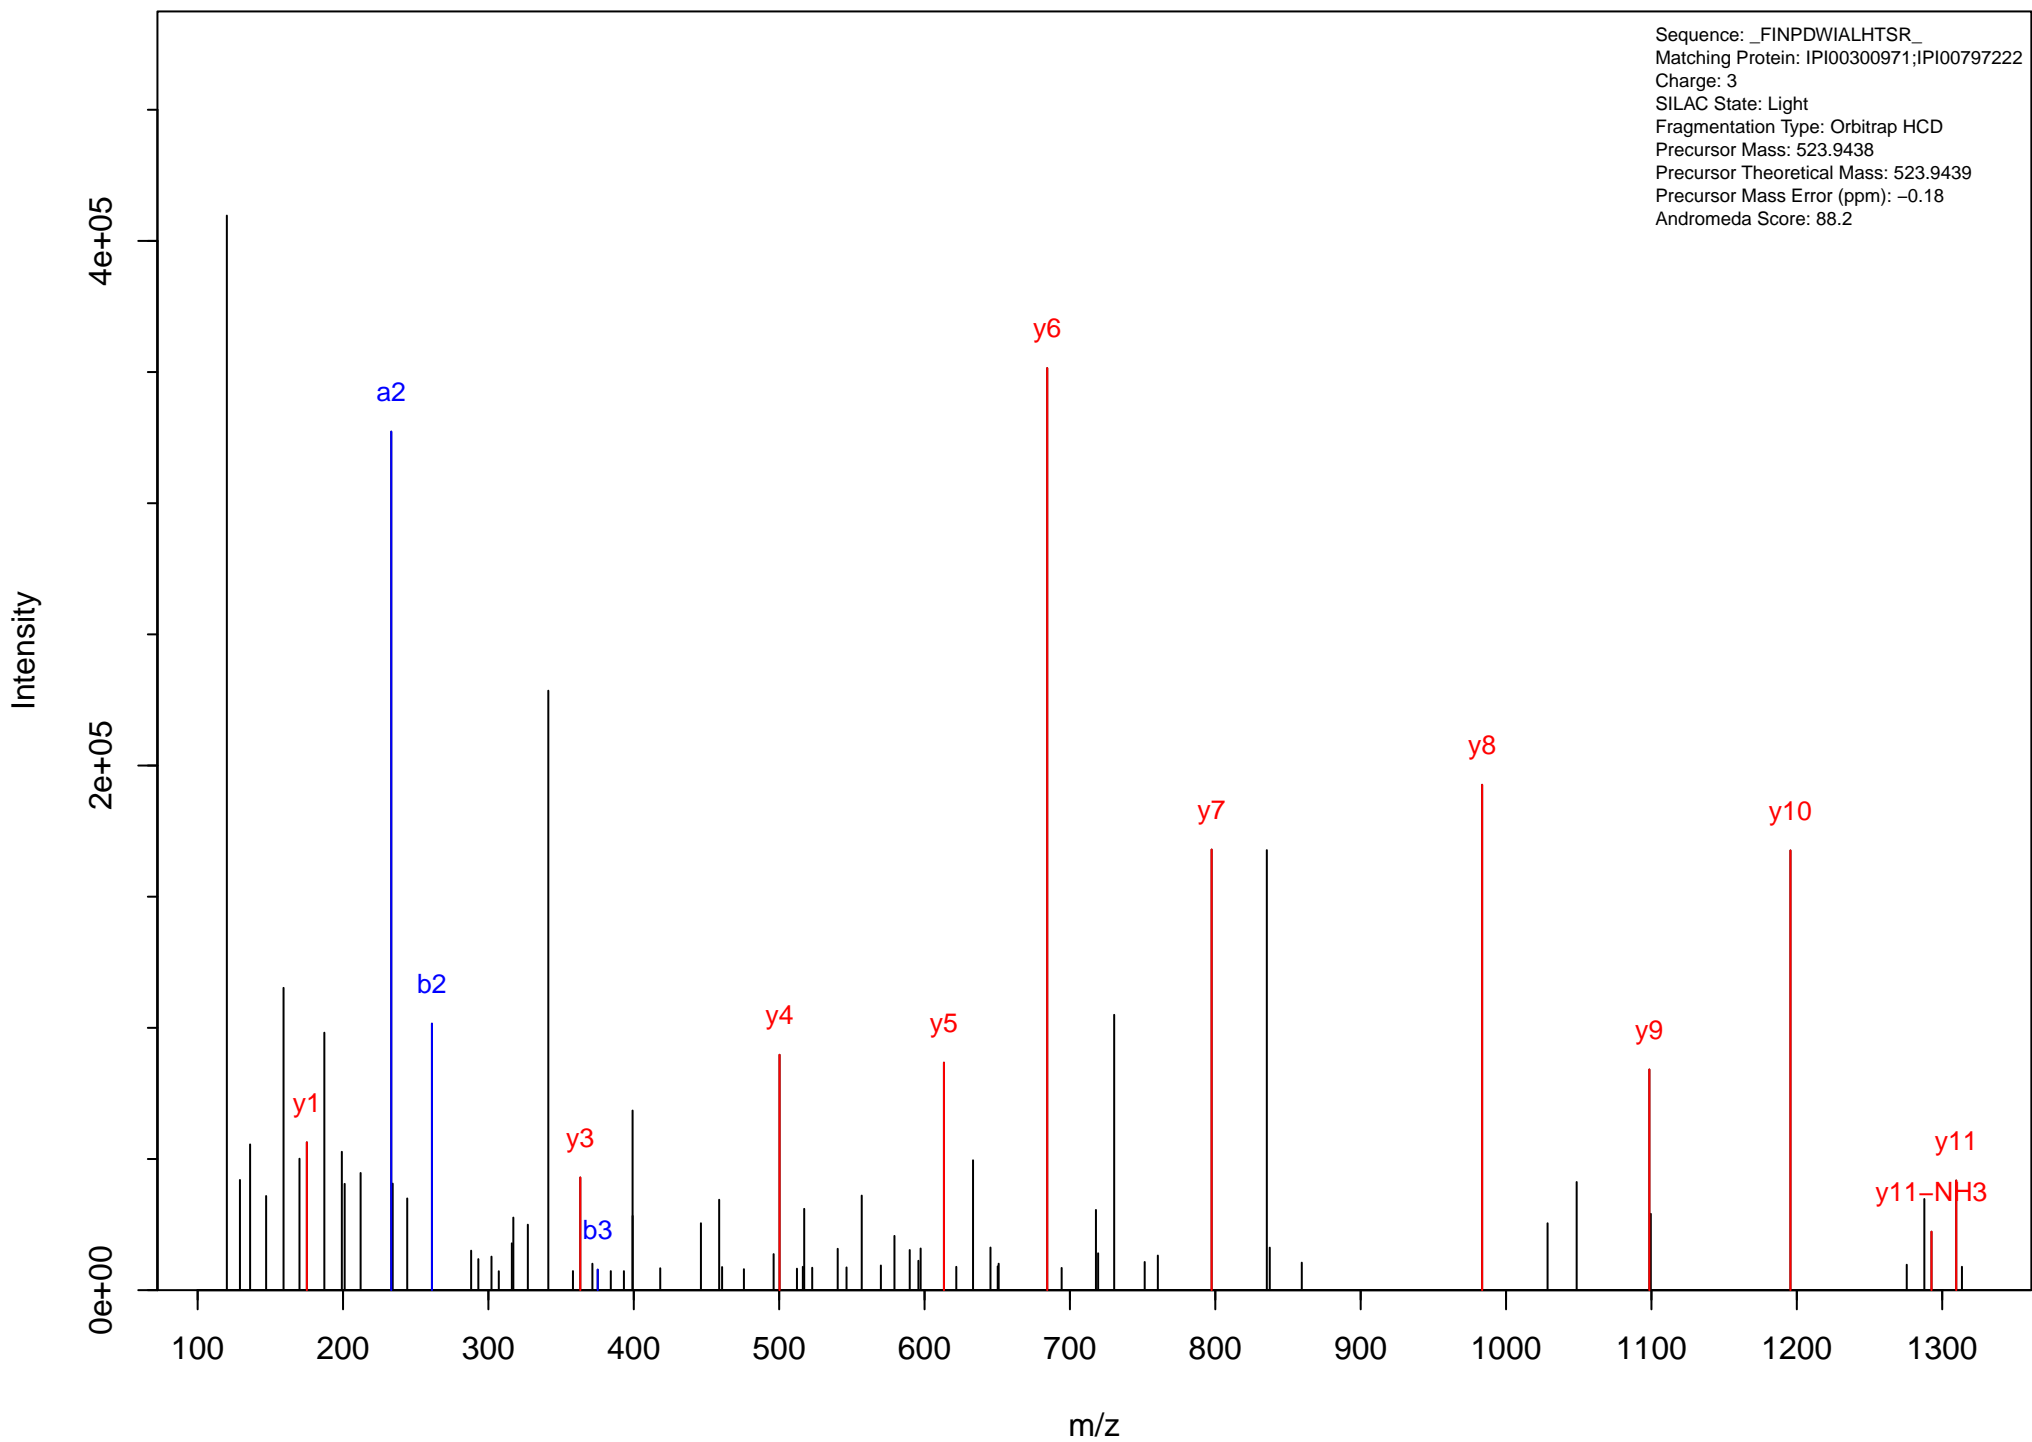

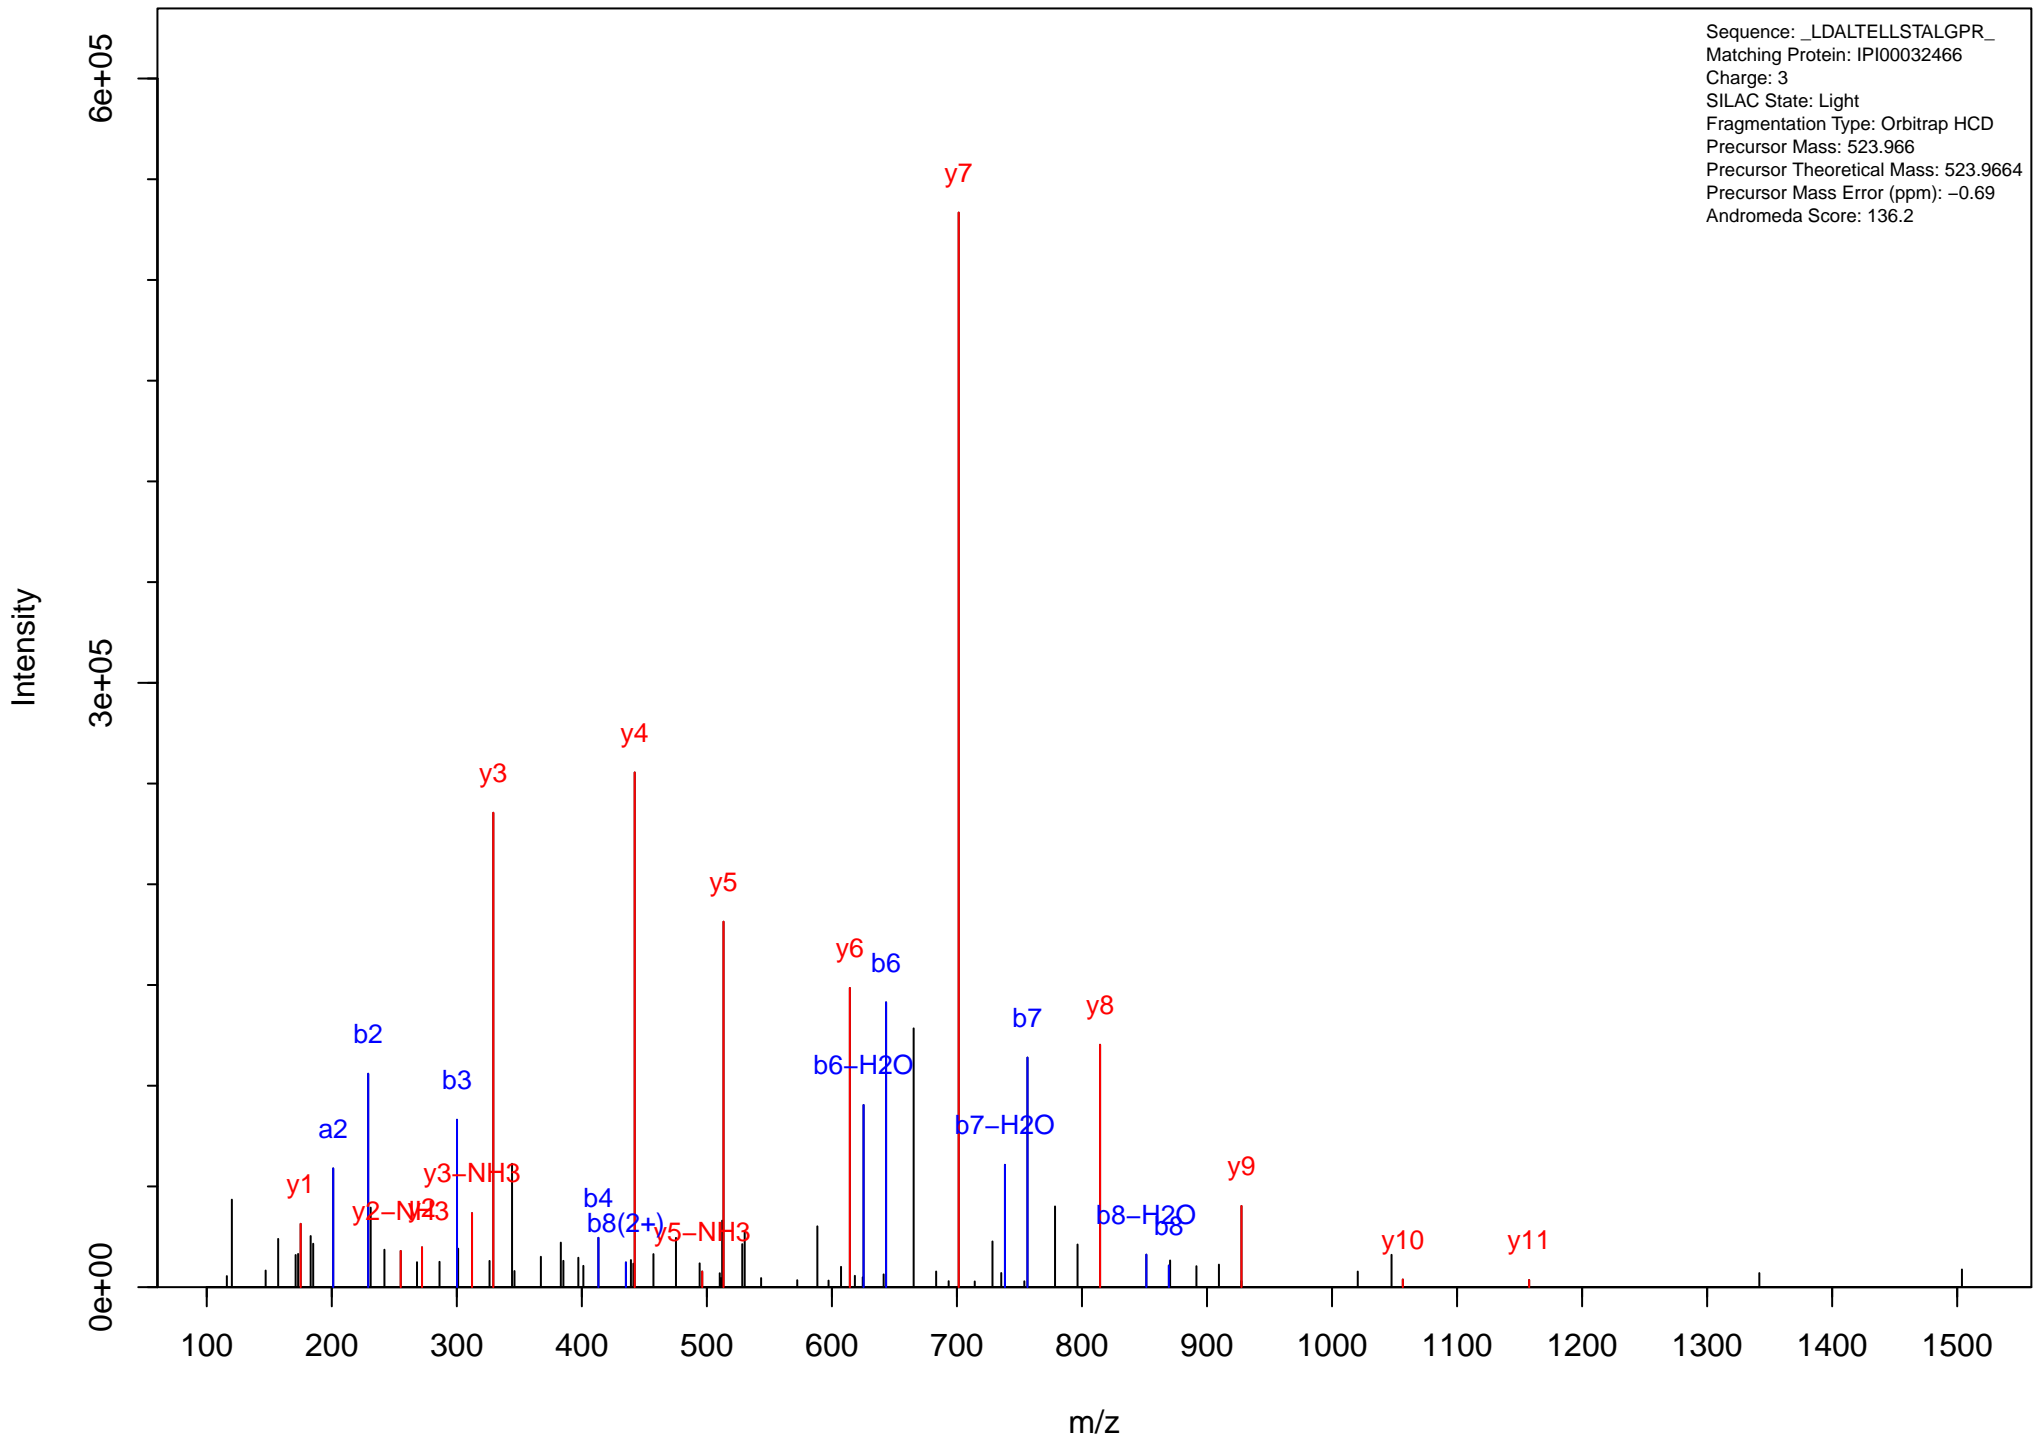

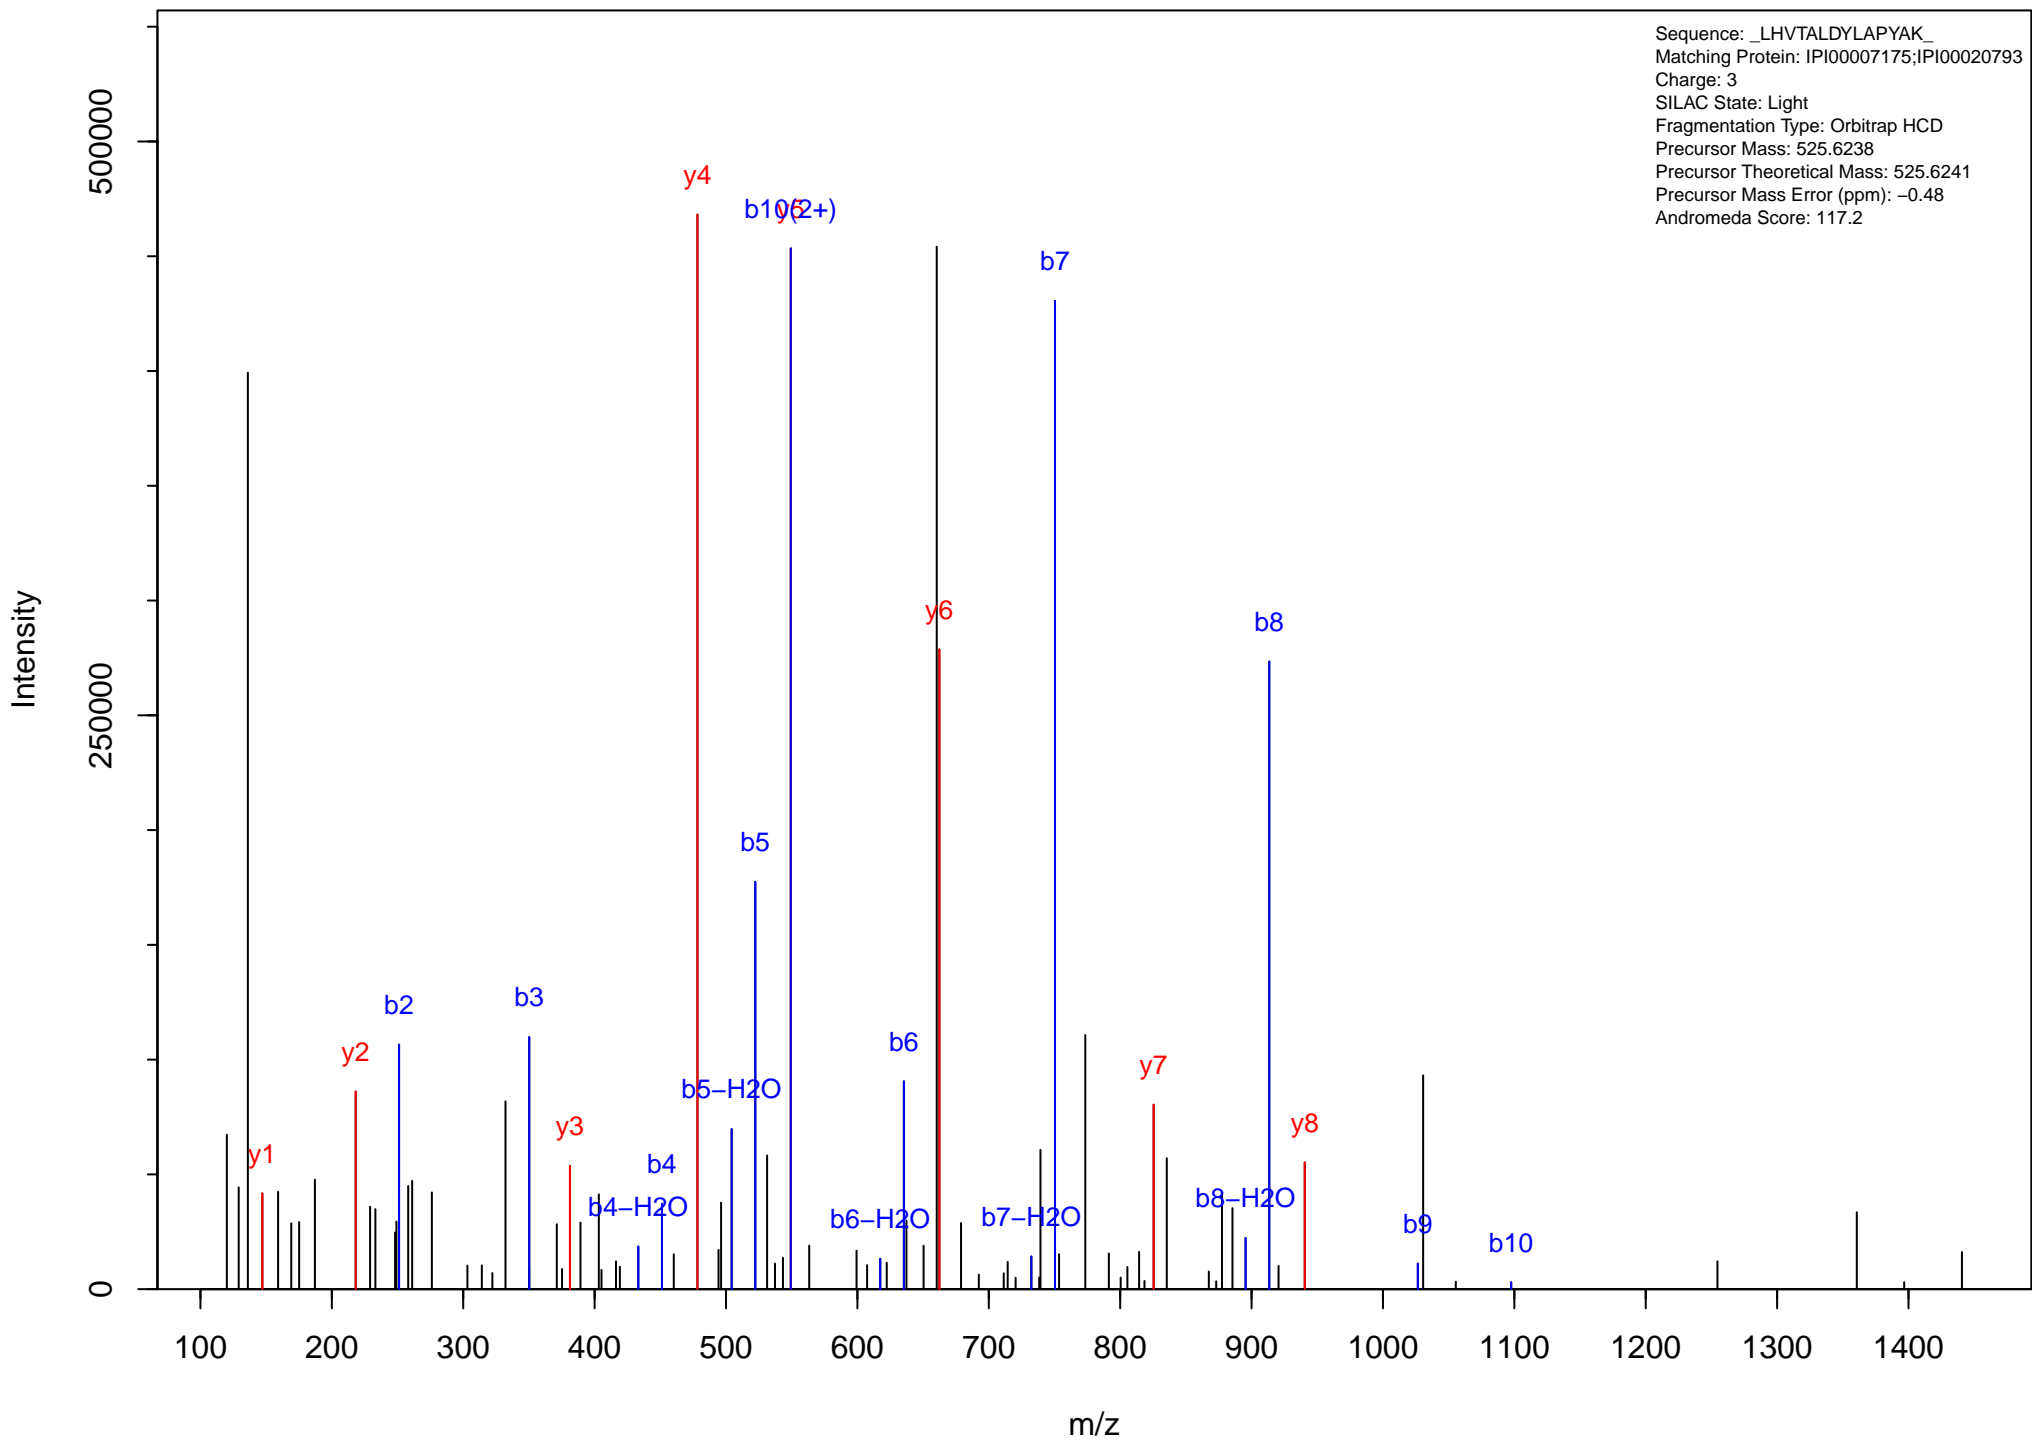

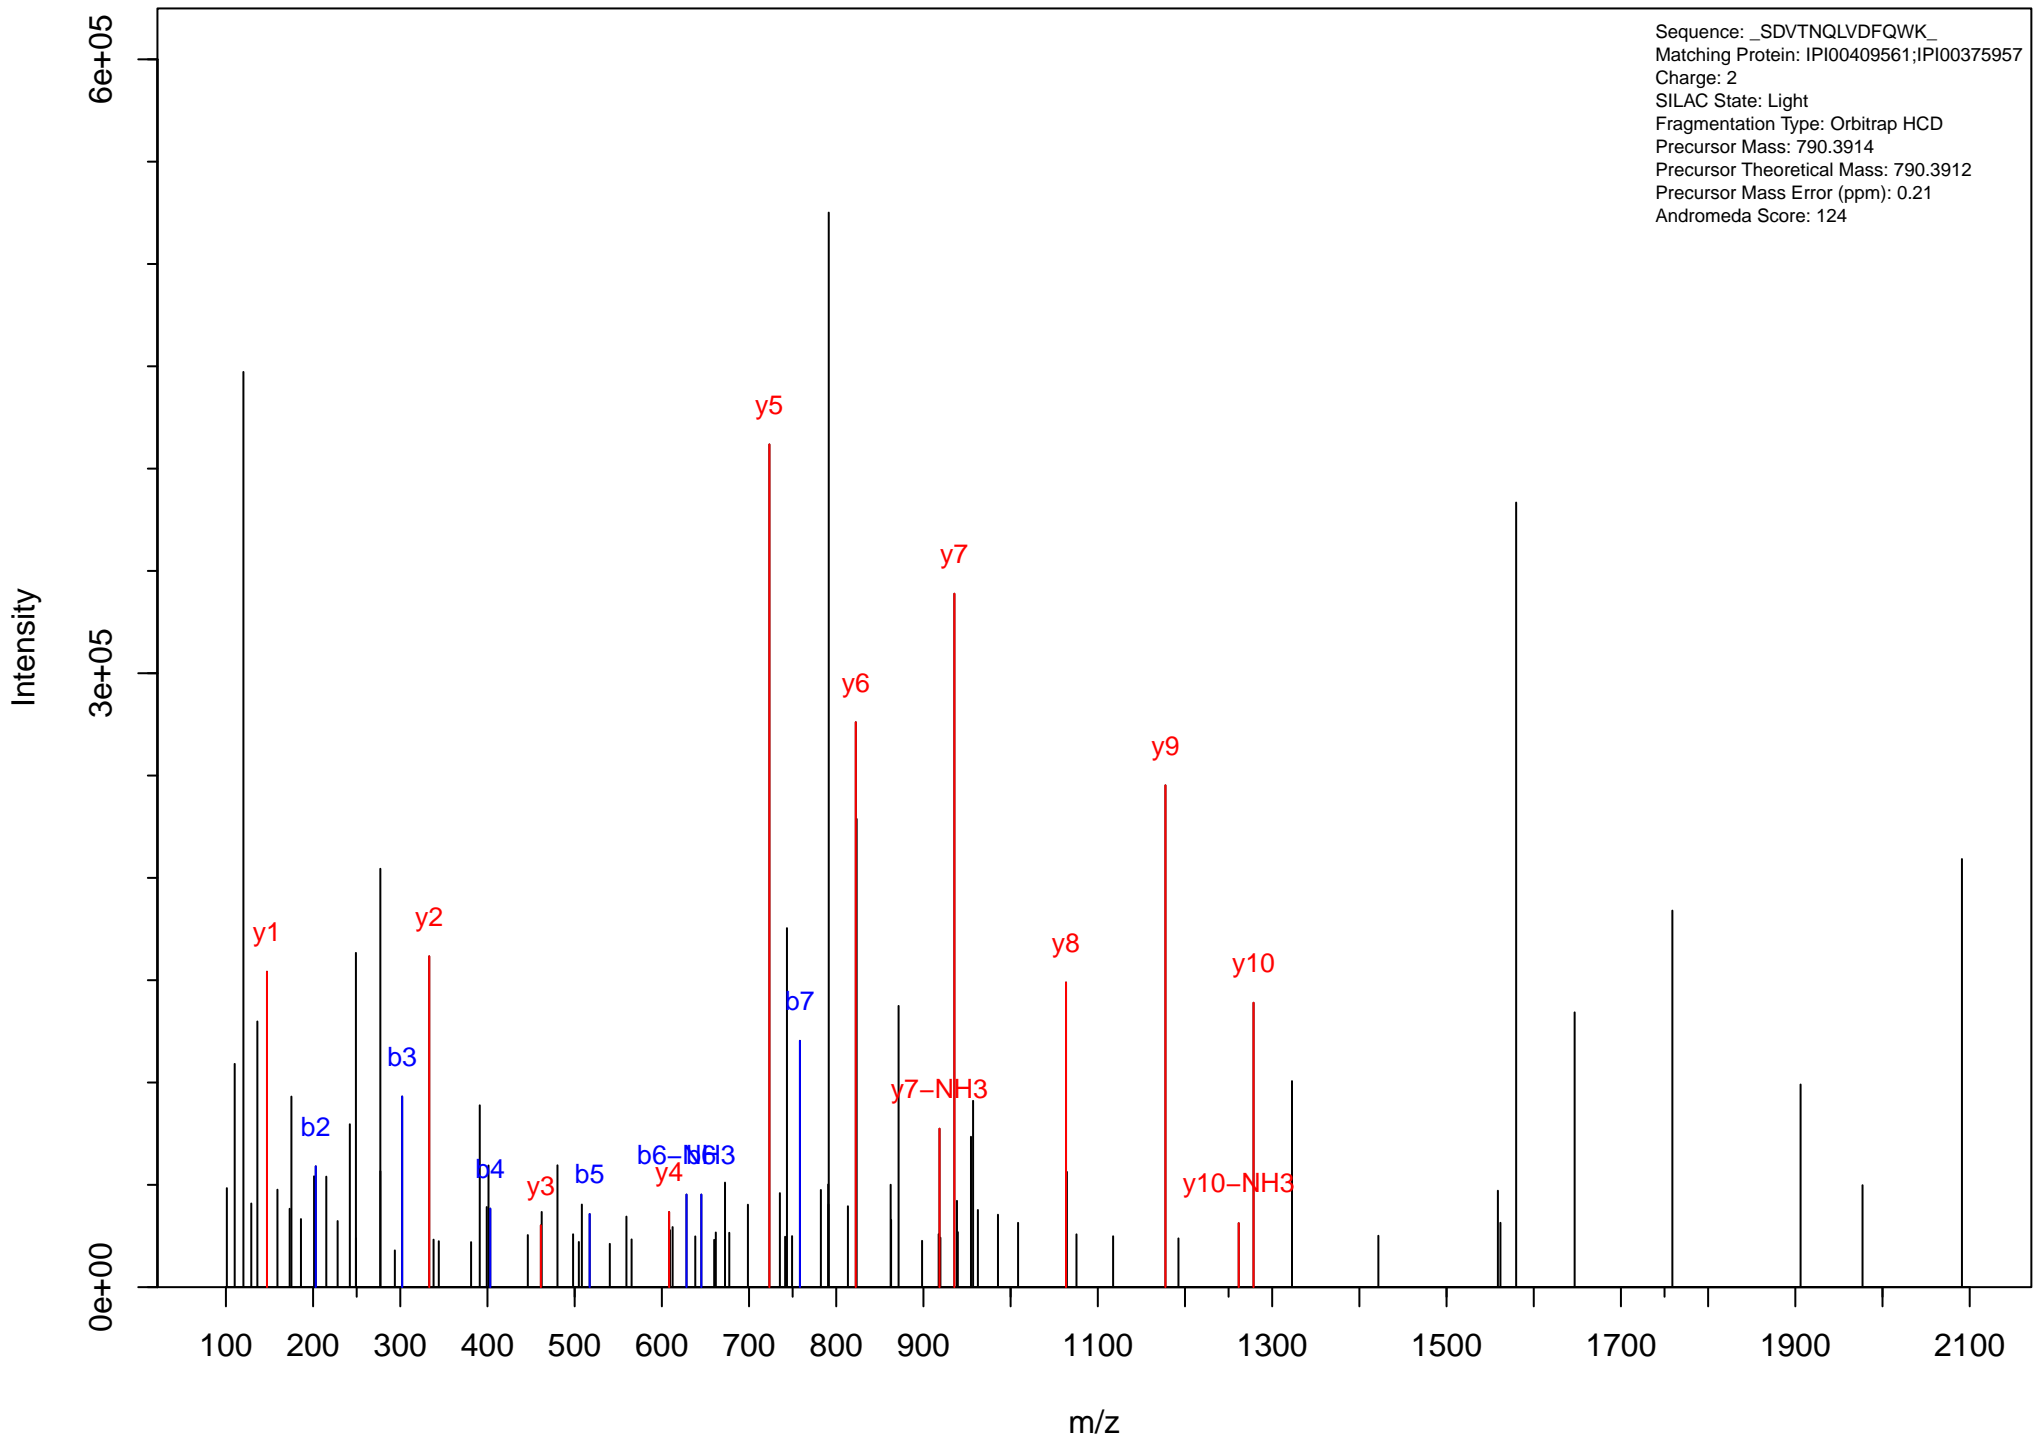

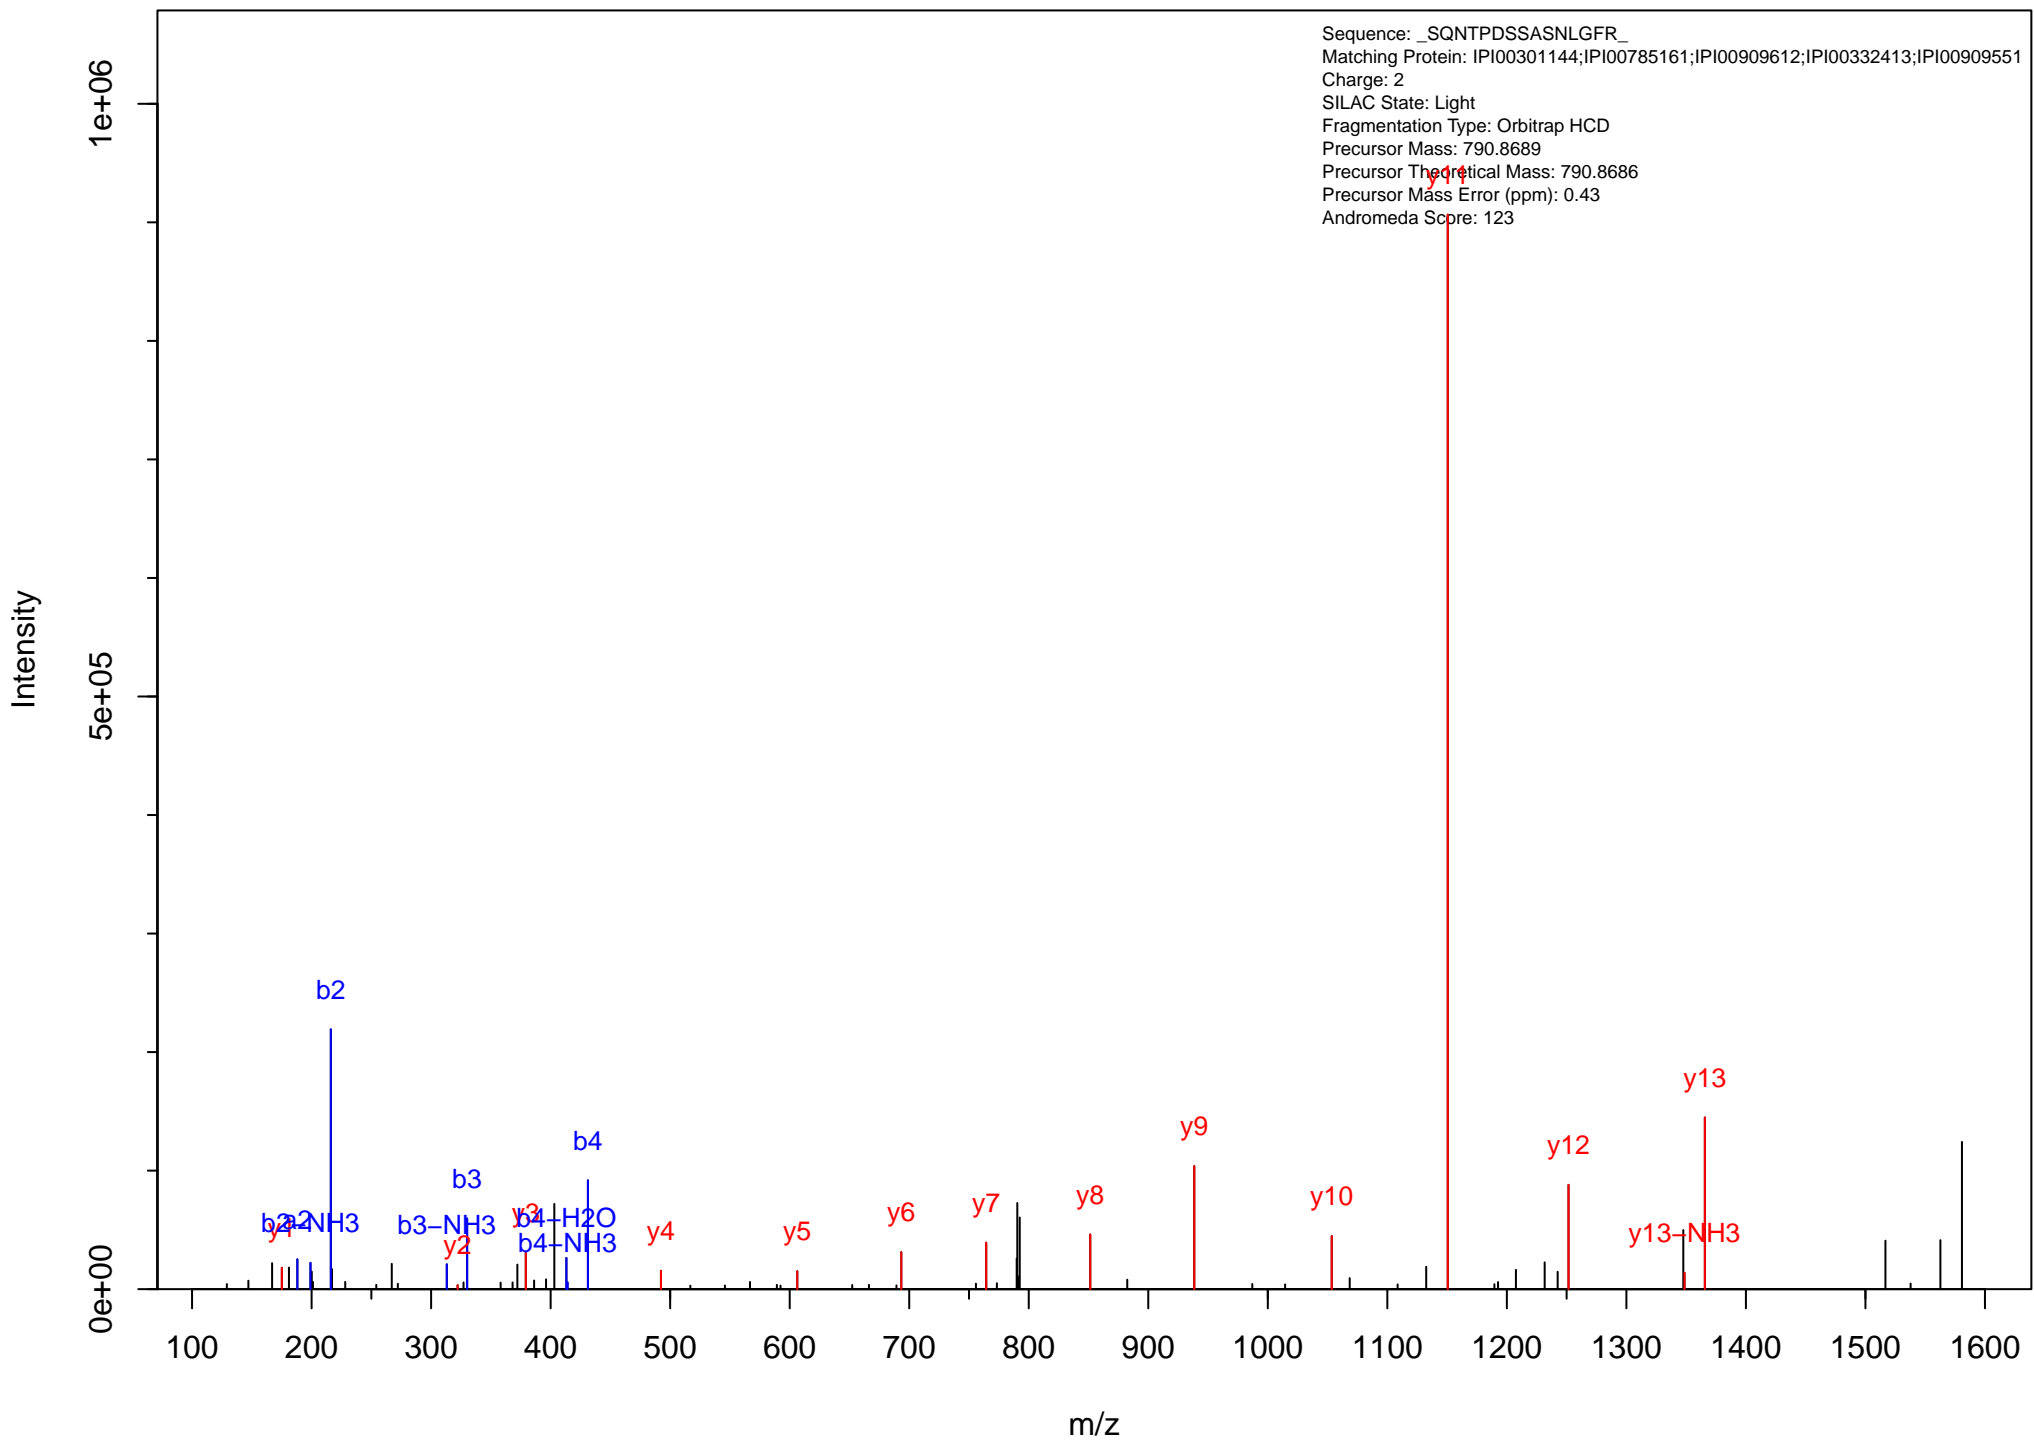

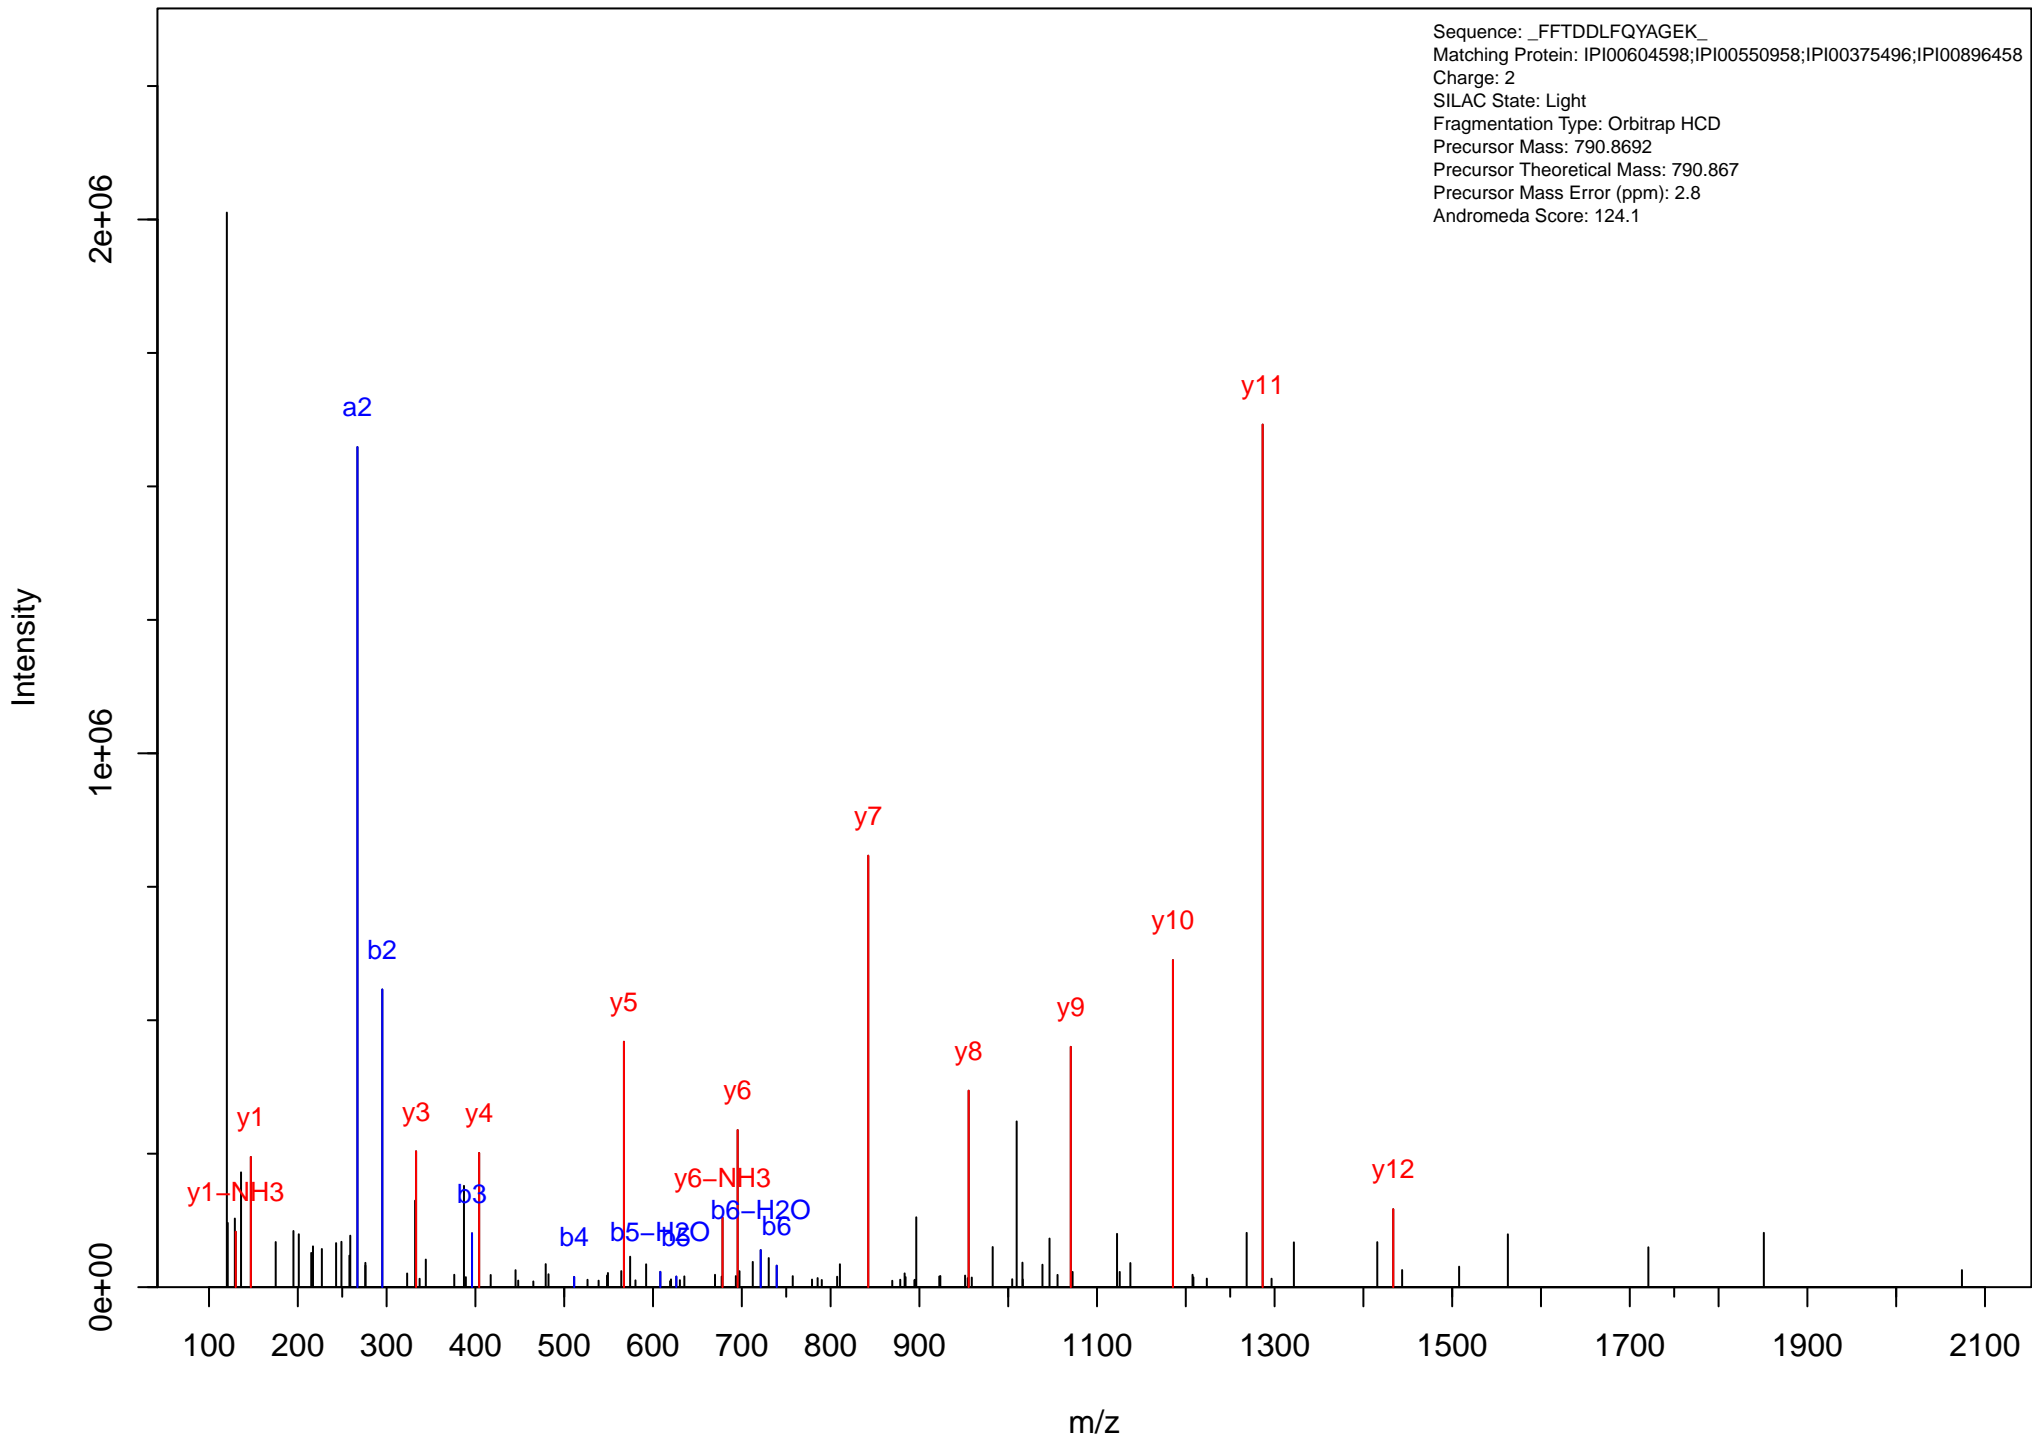

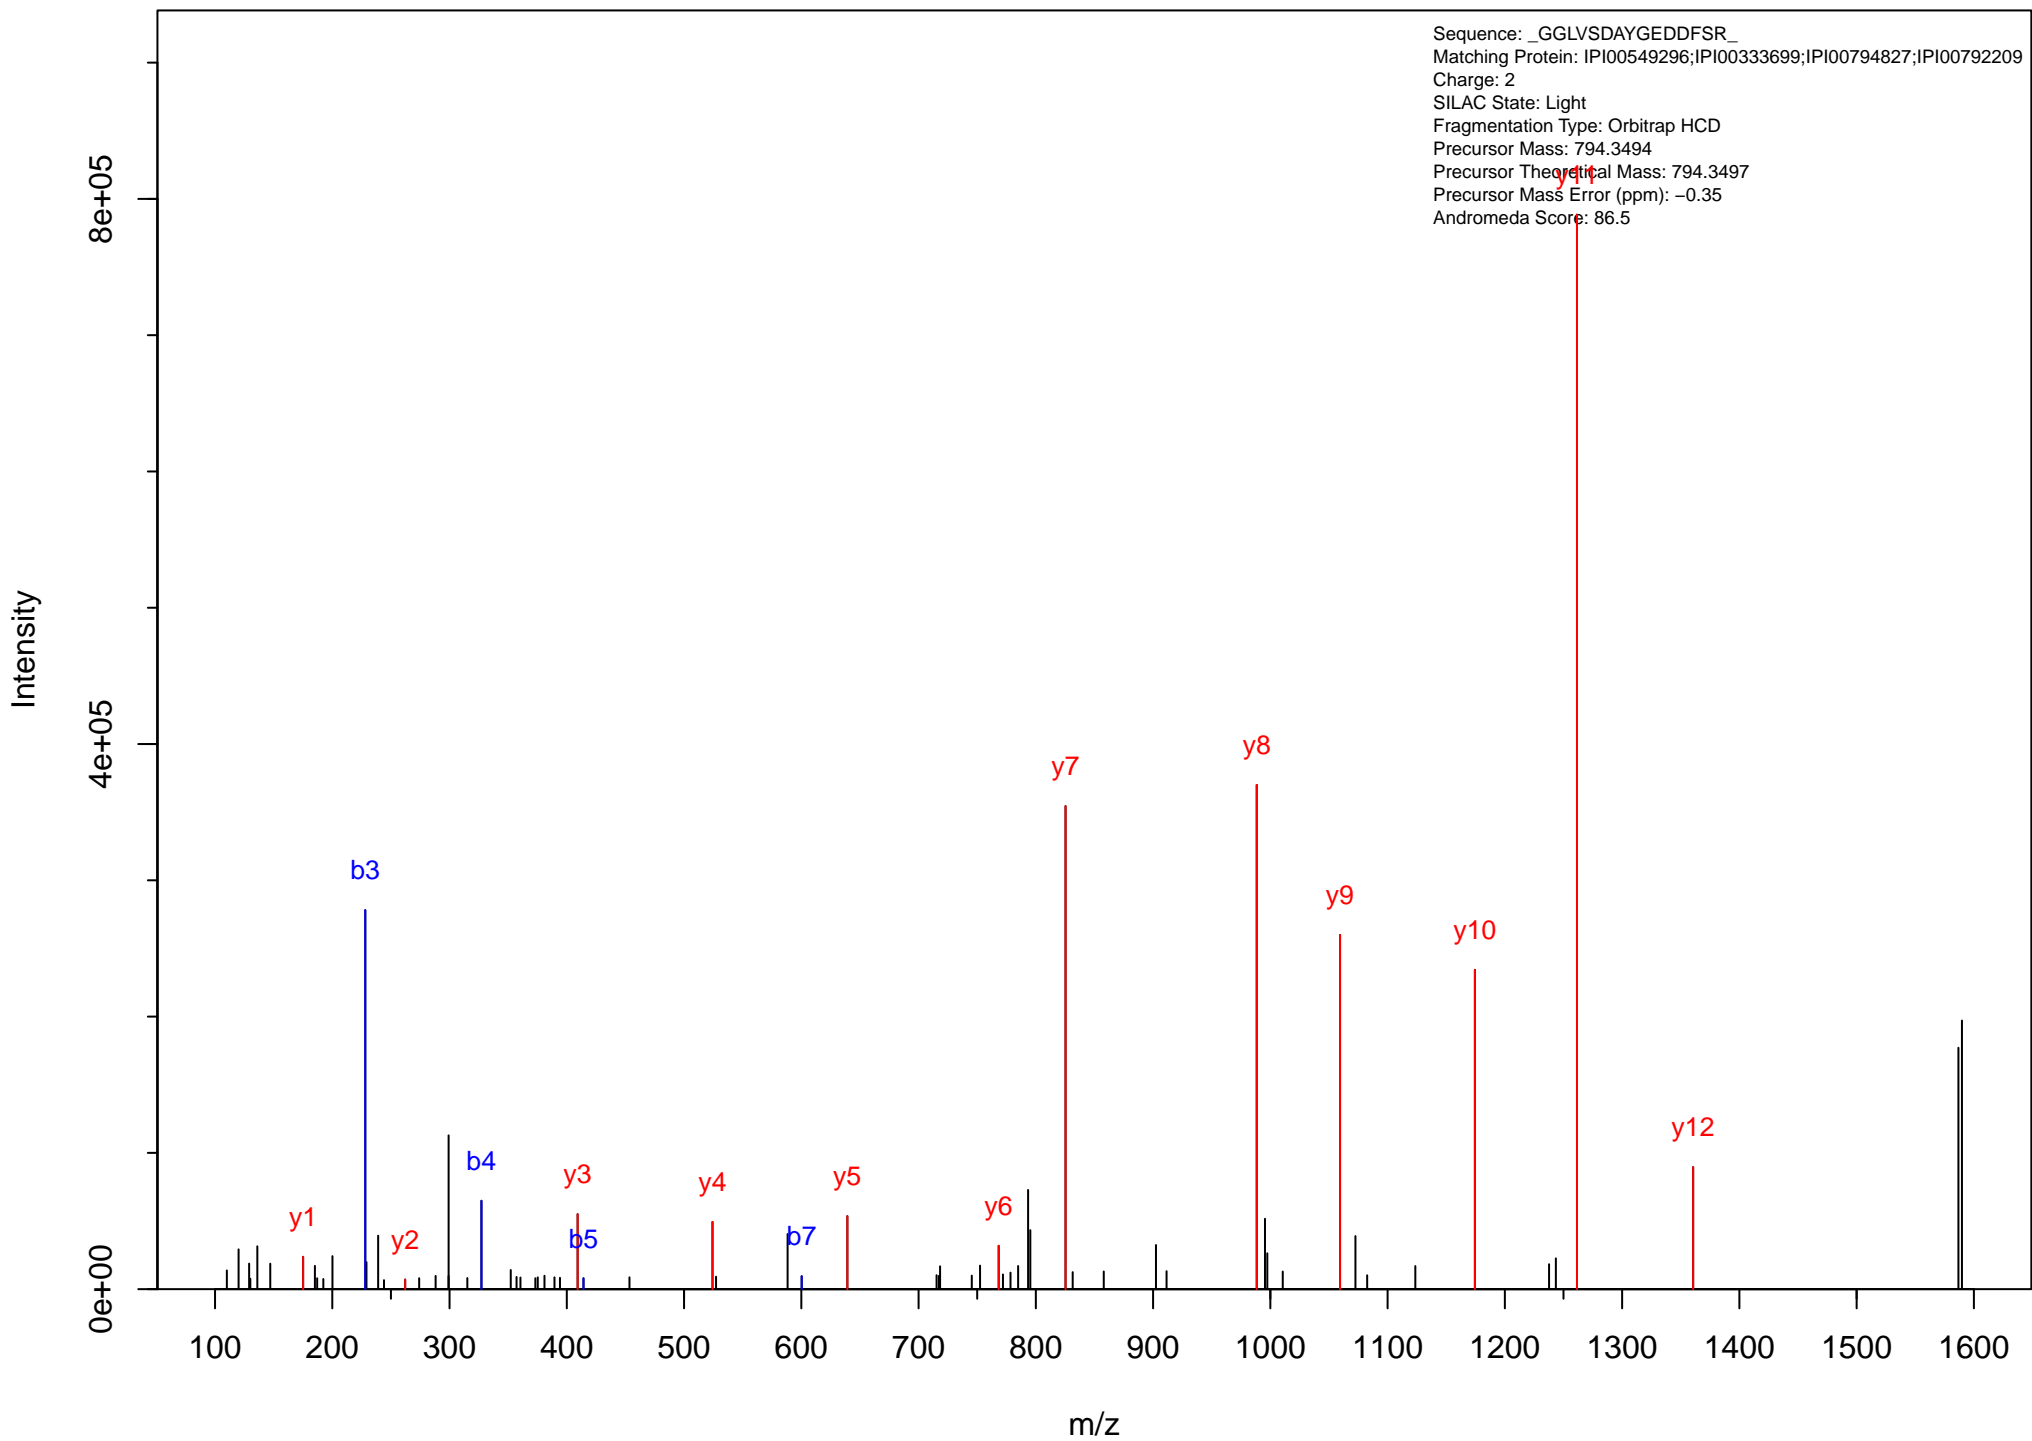

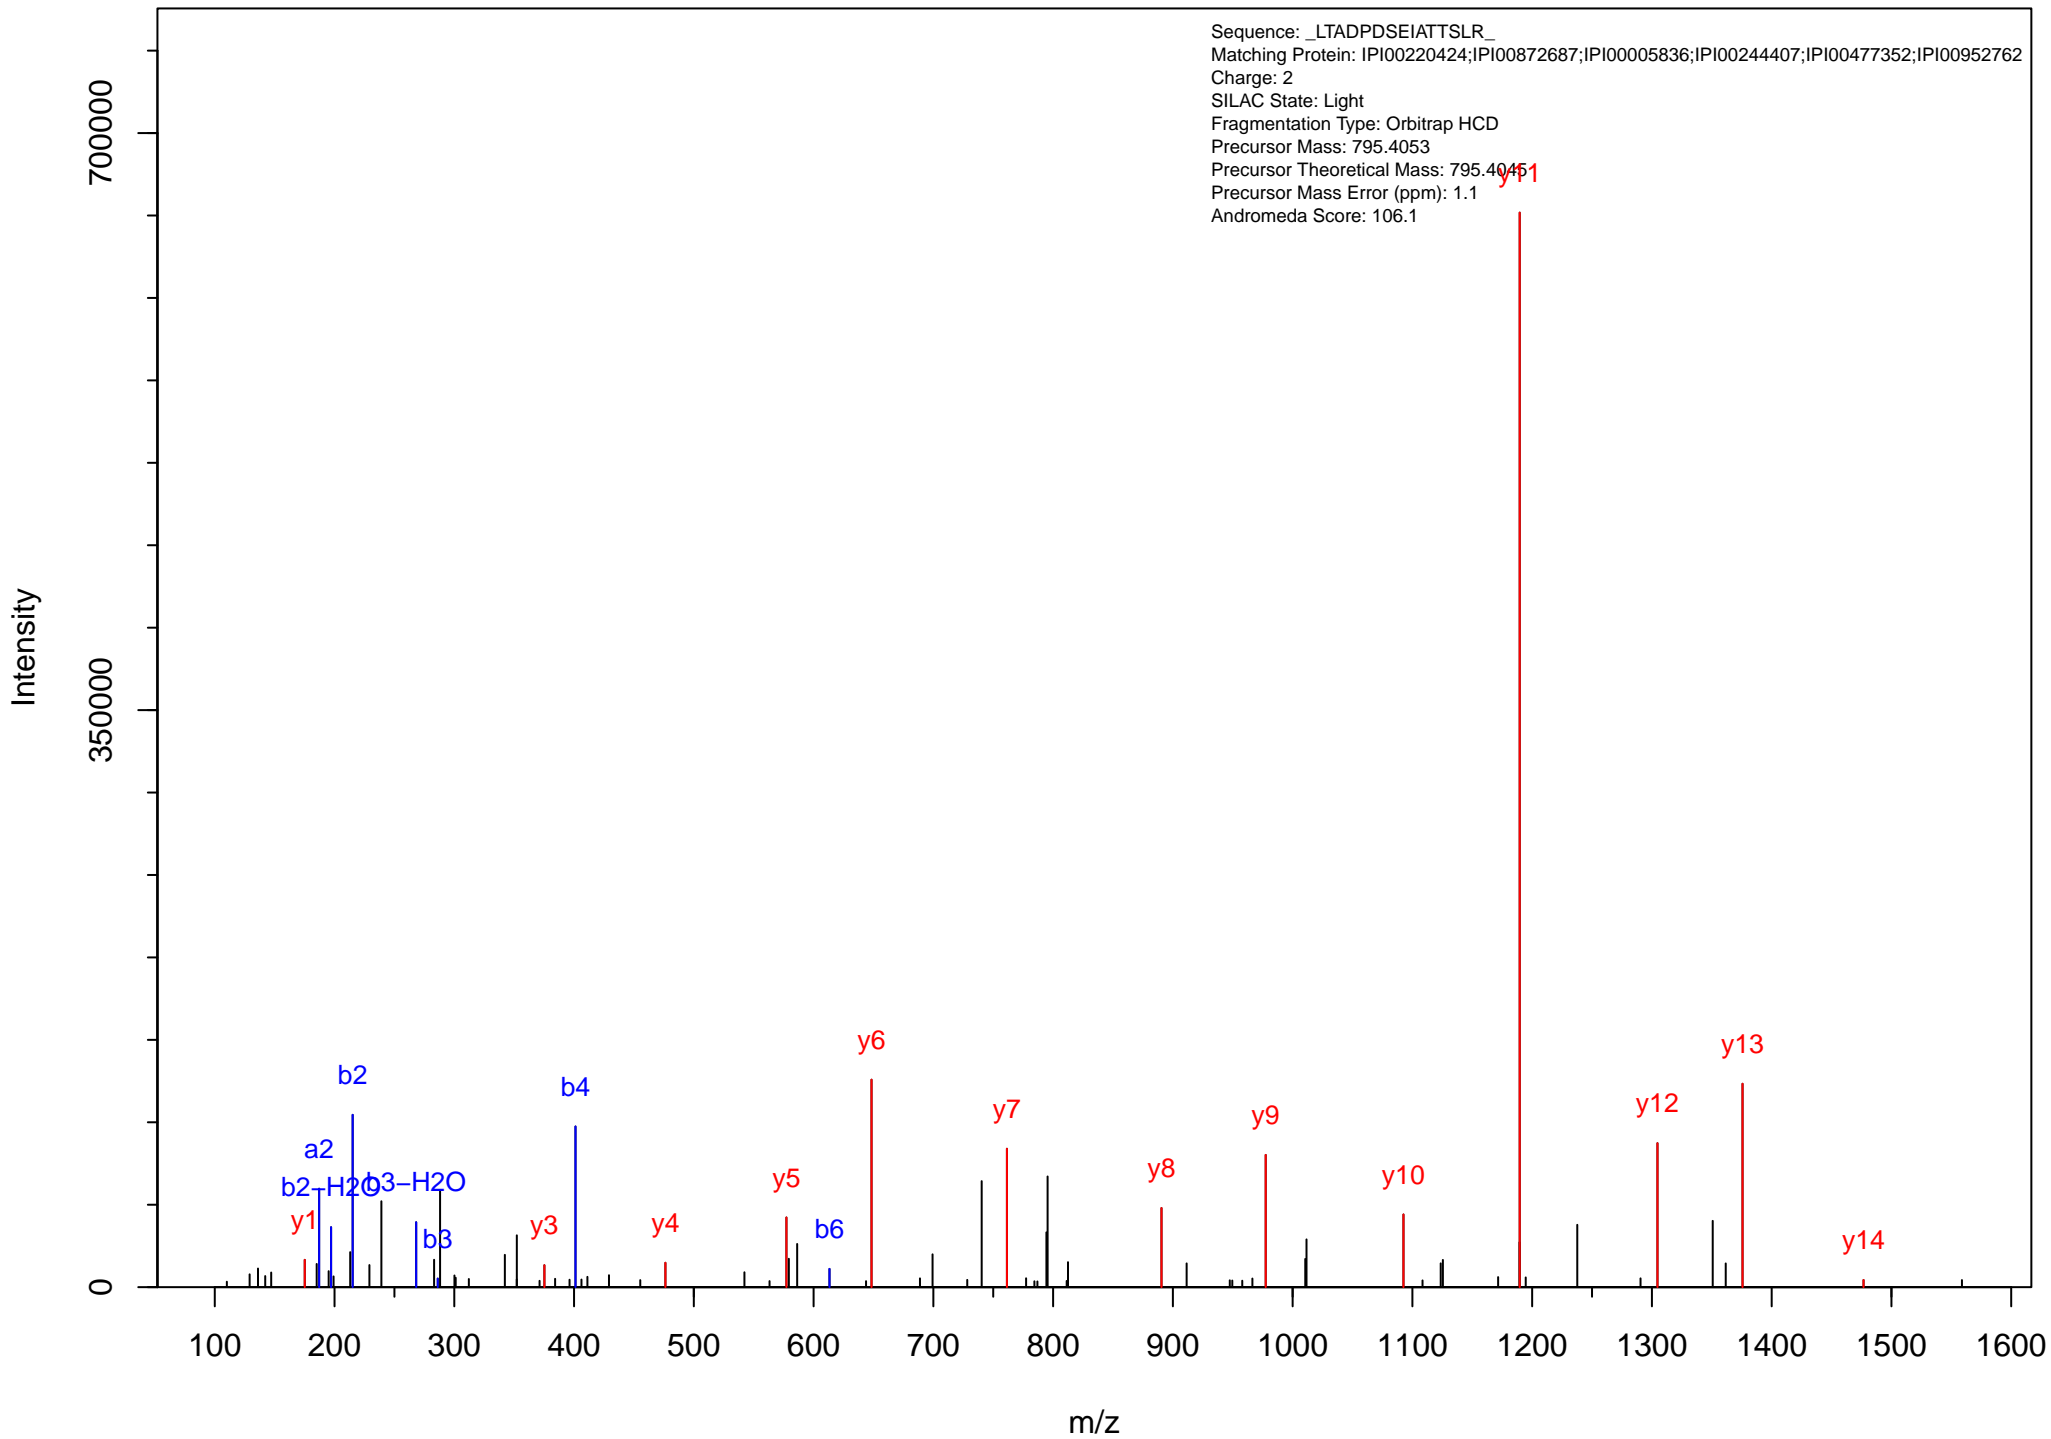

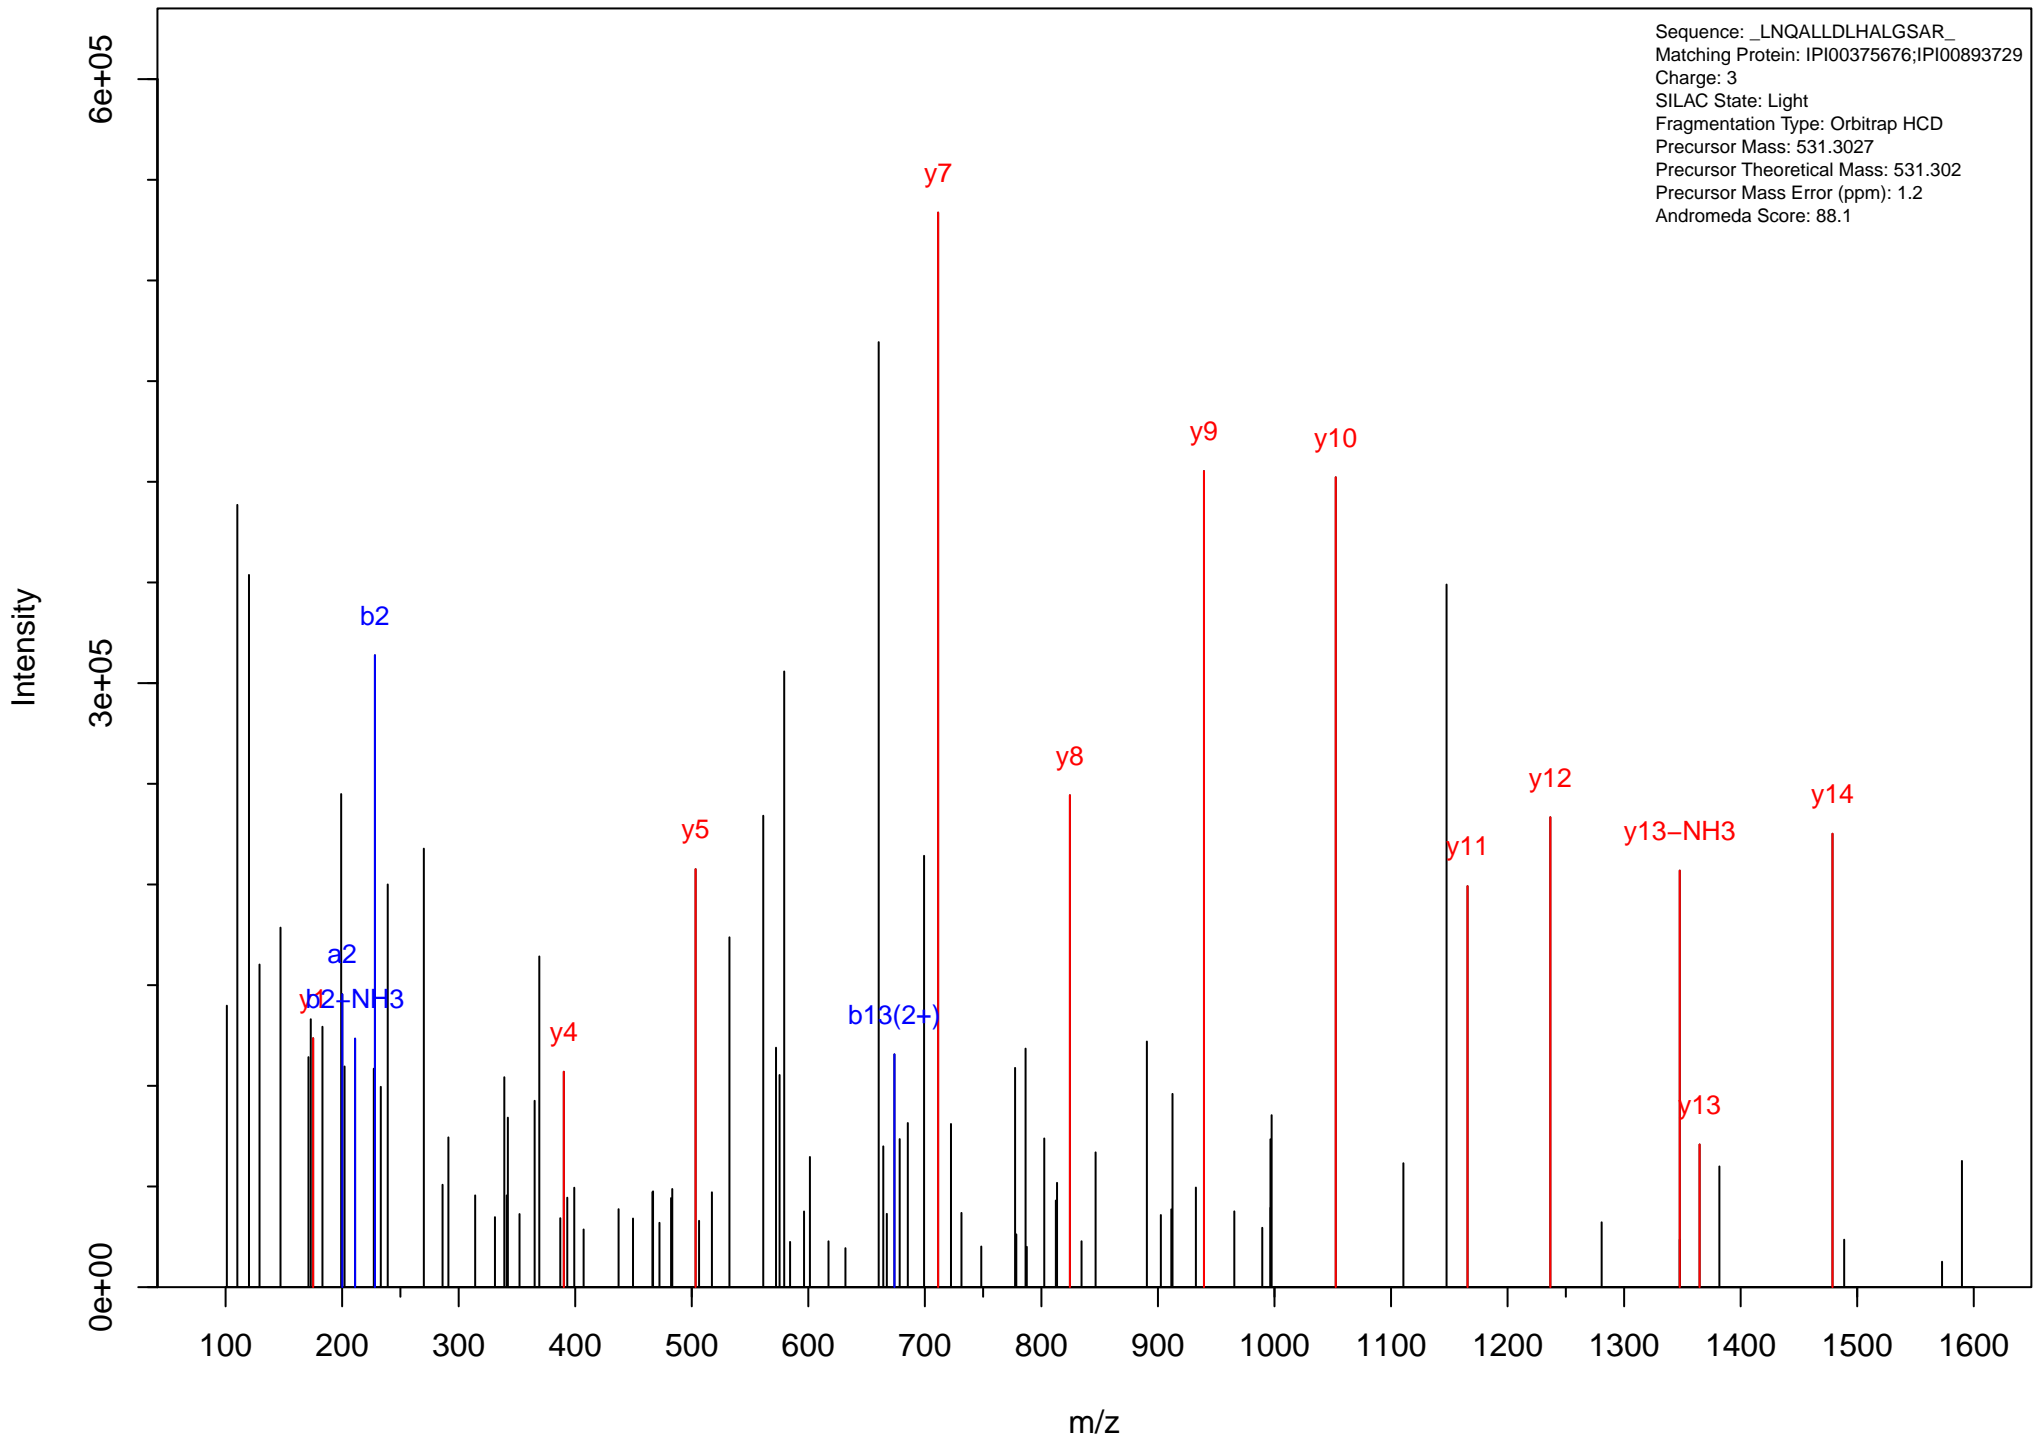

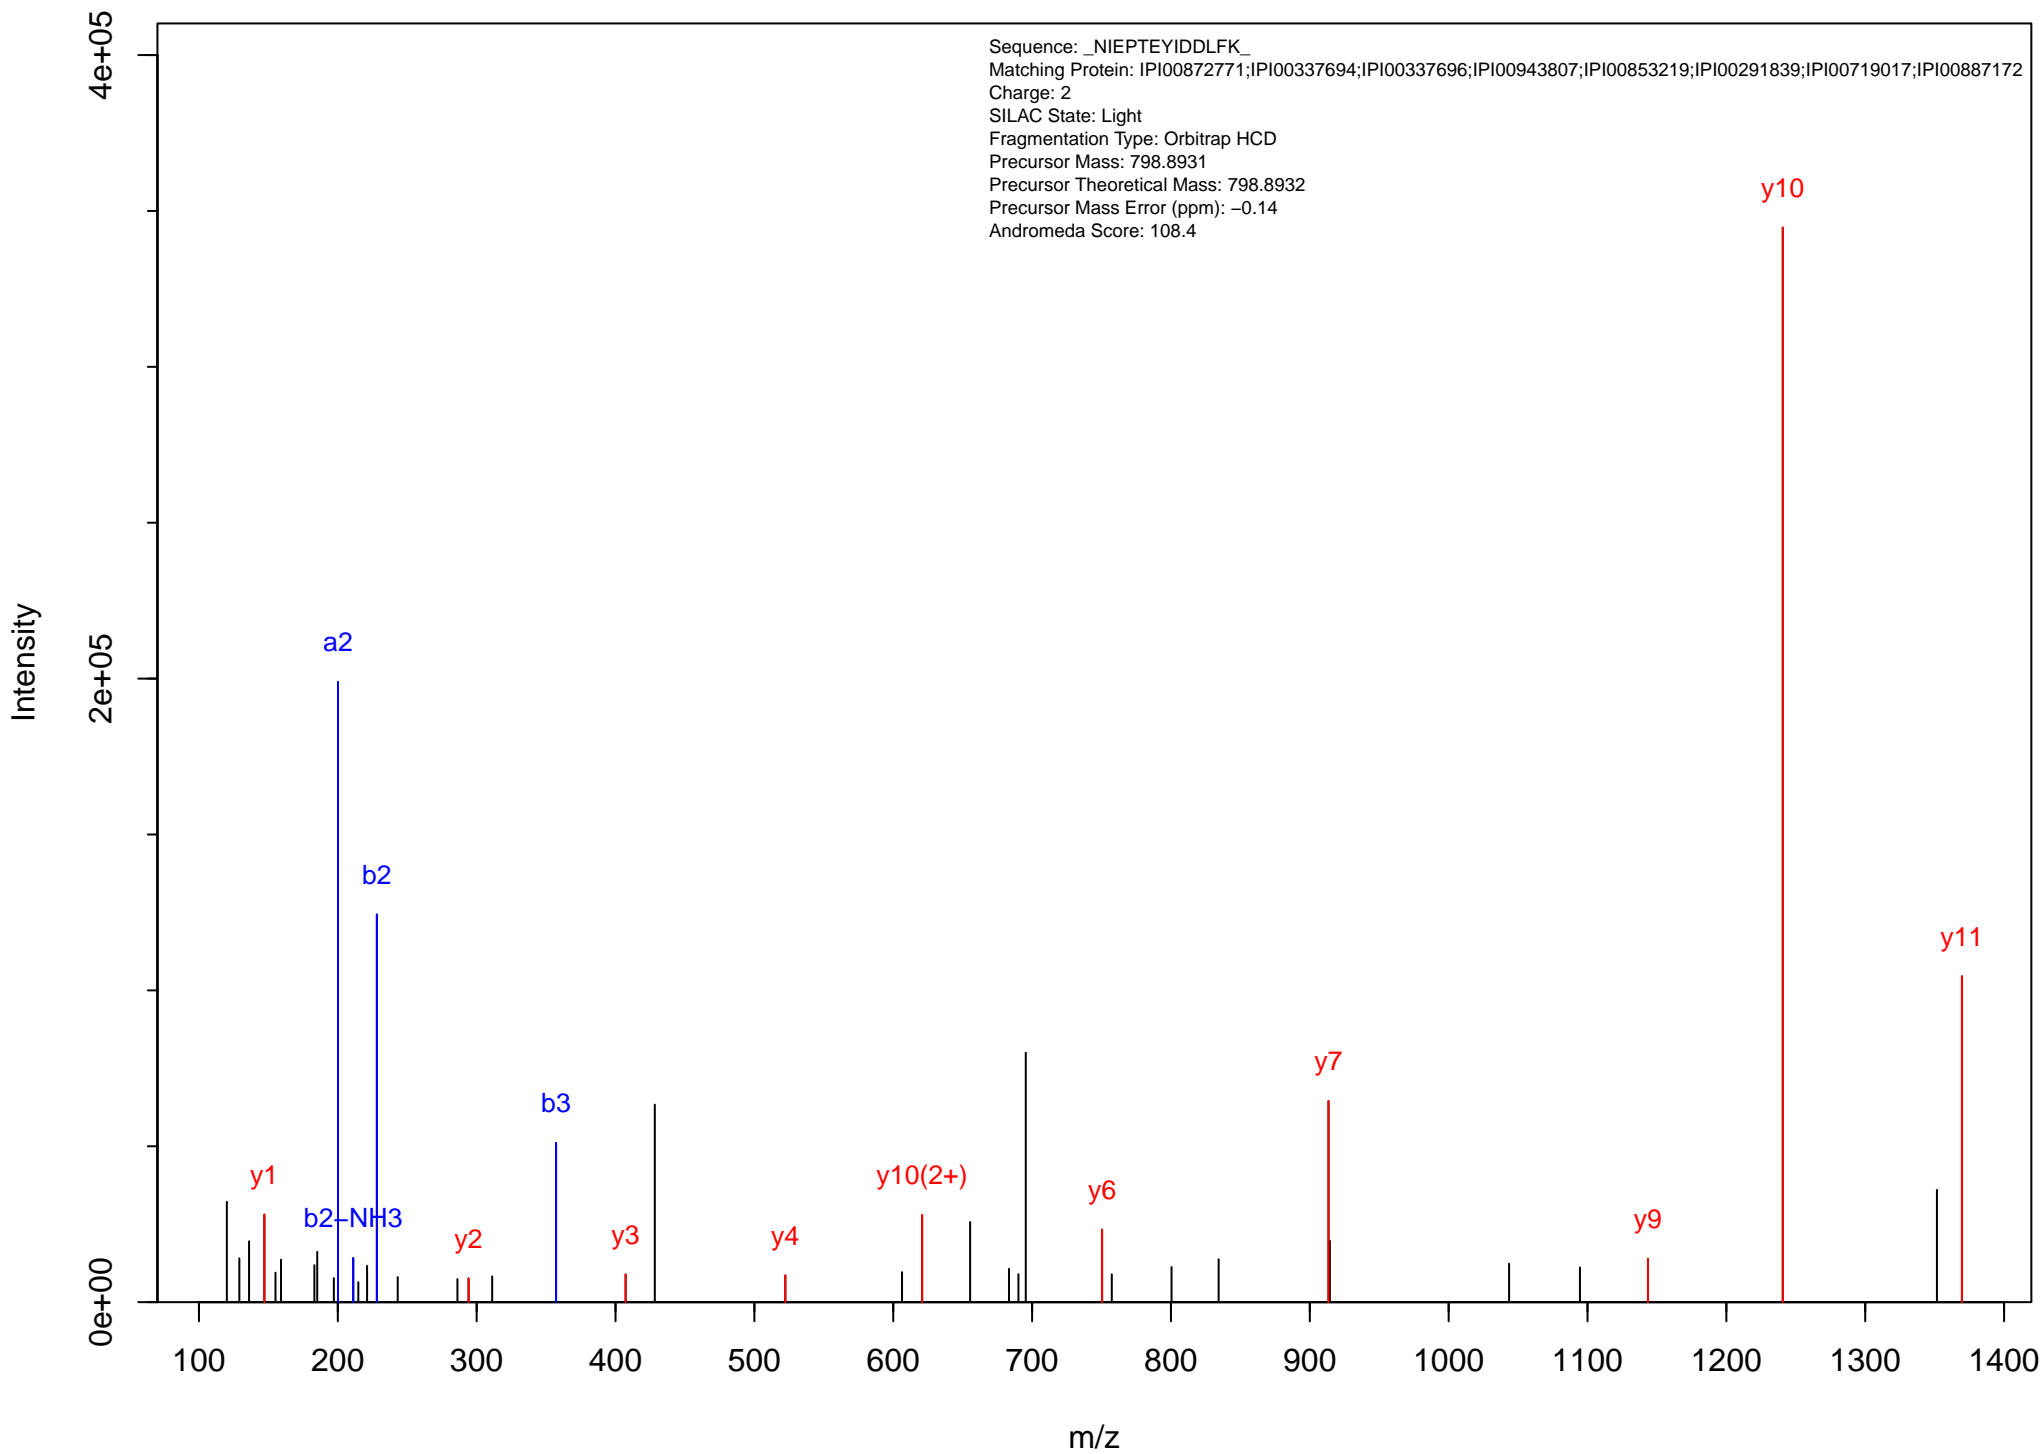

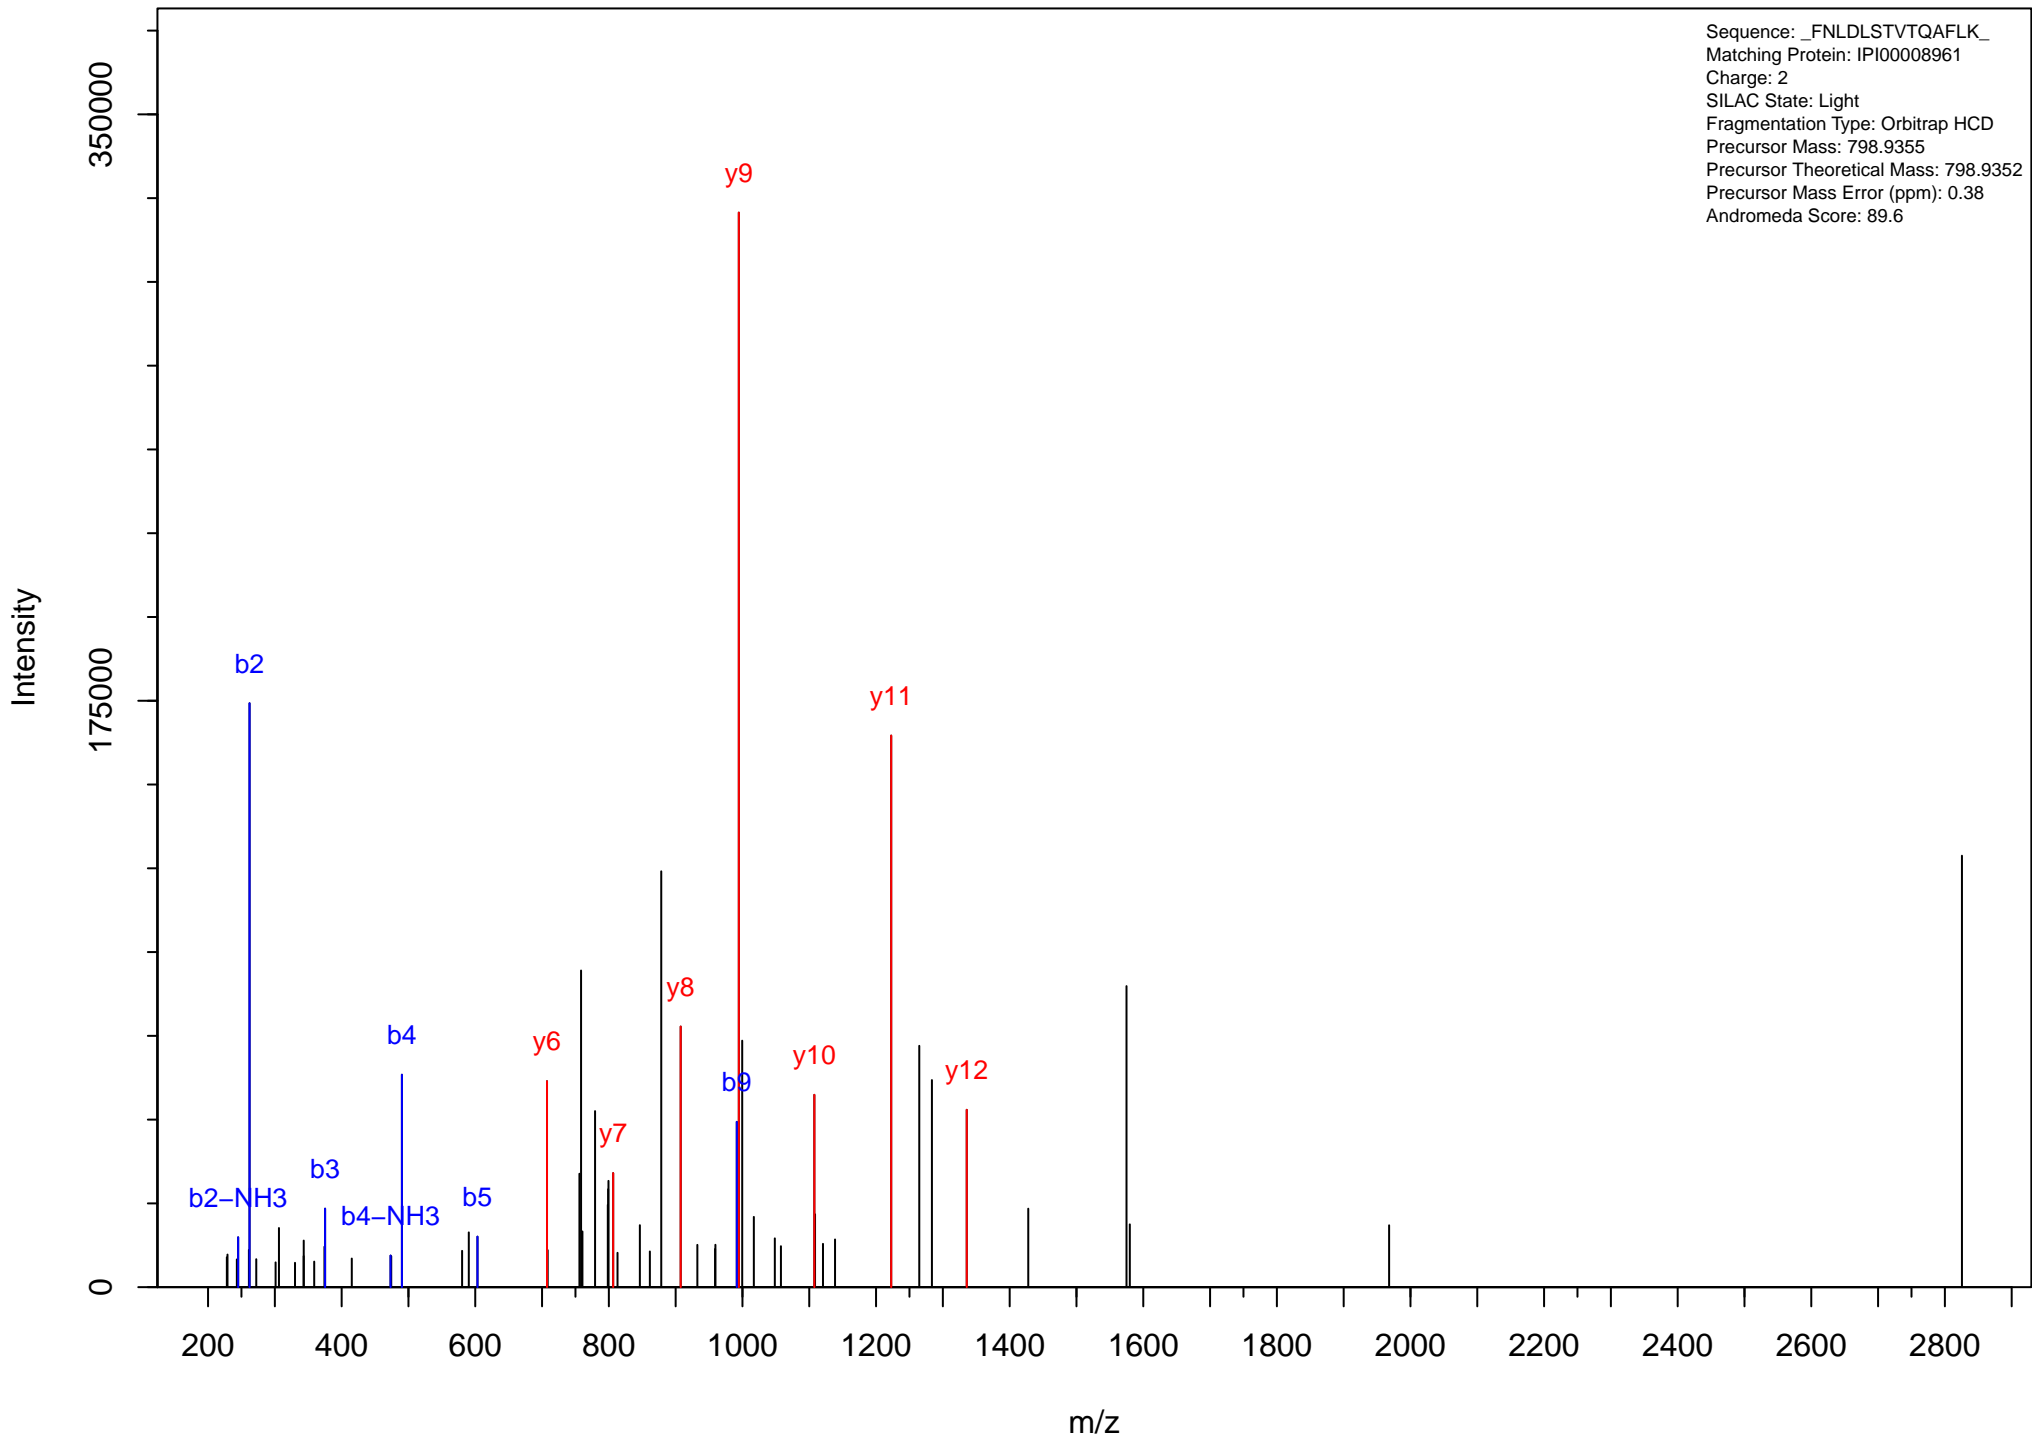

Intensity

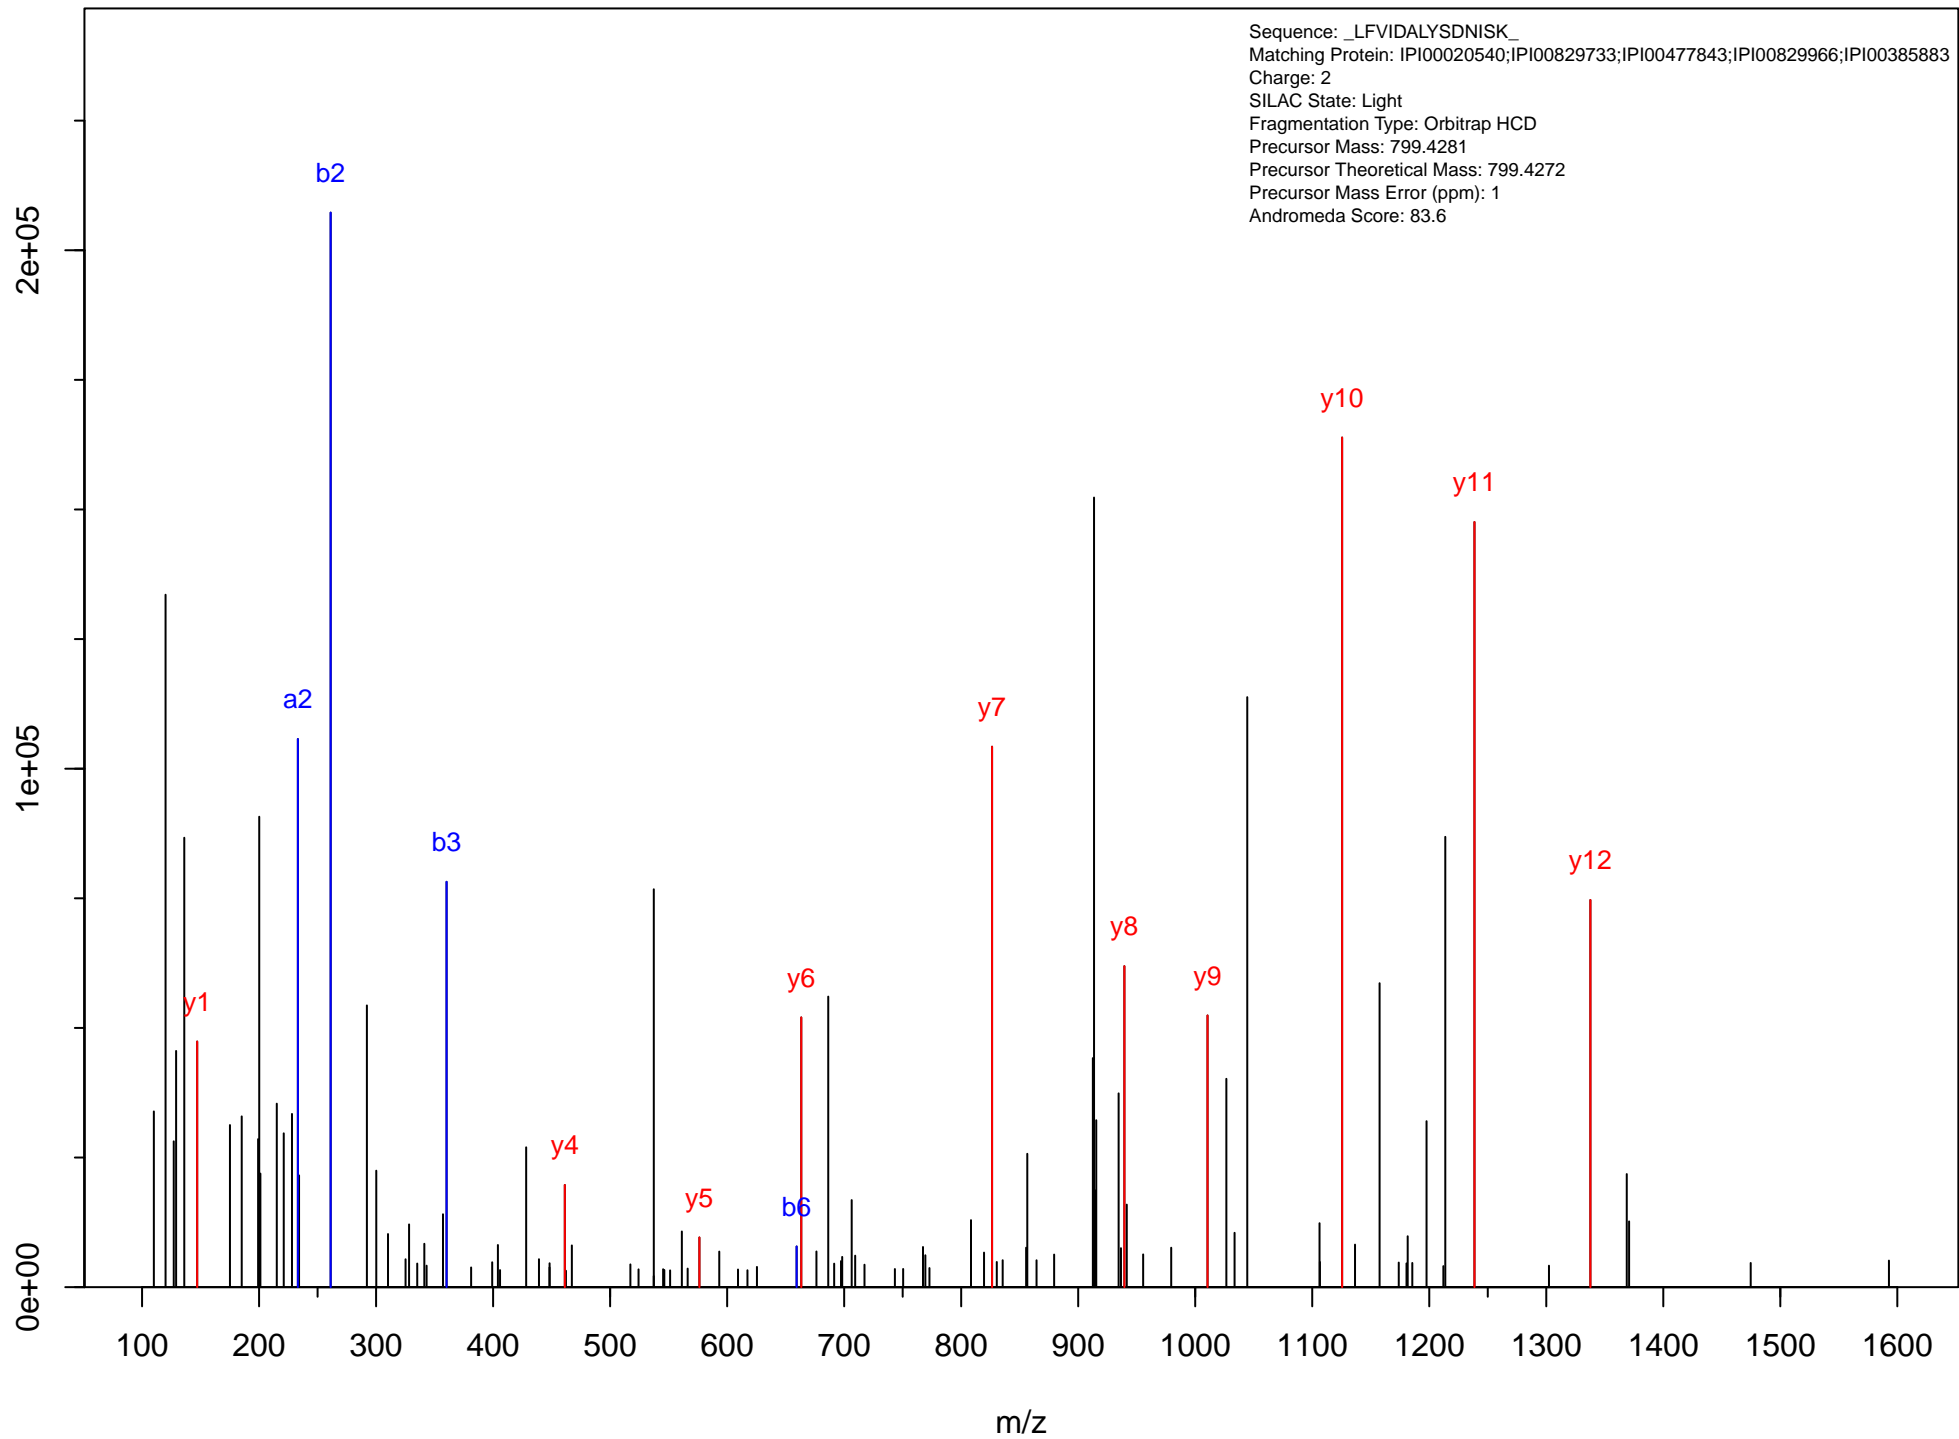

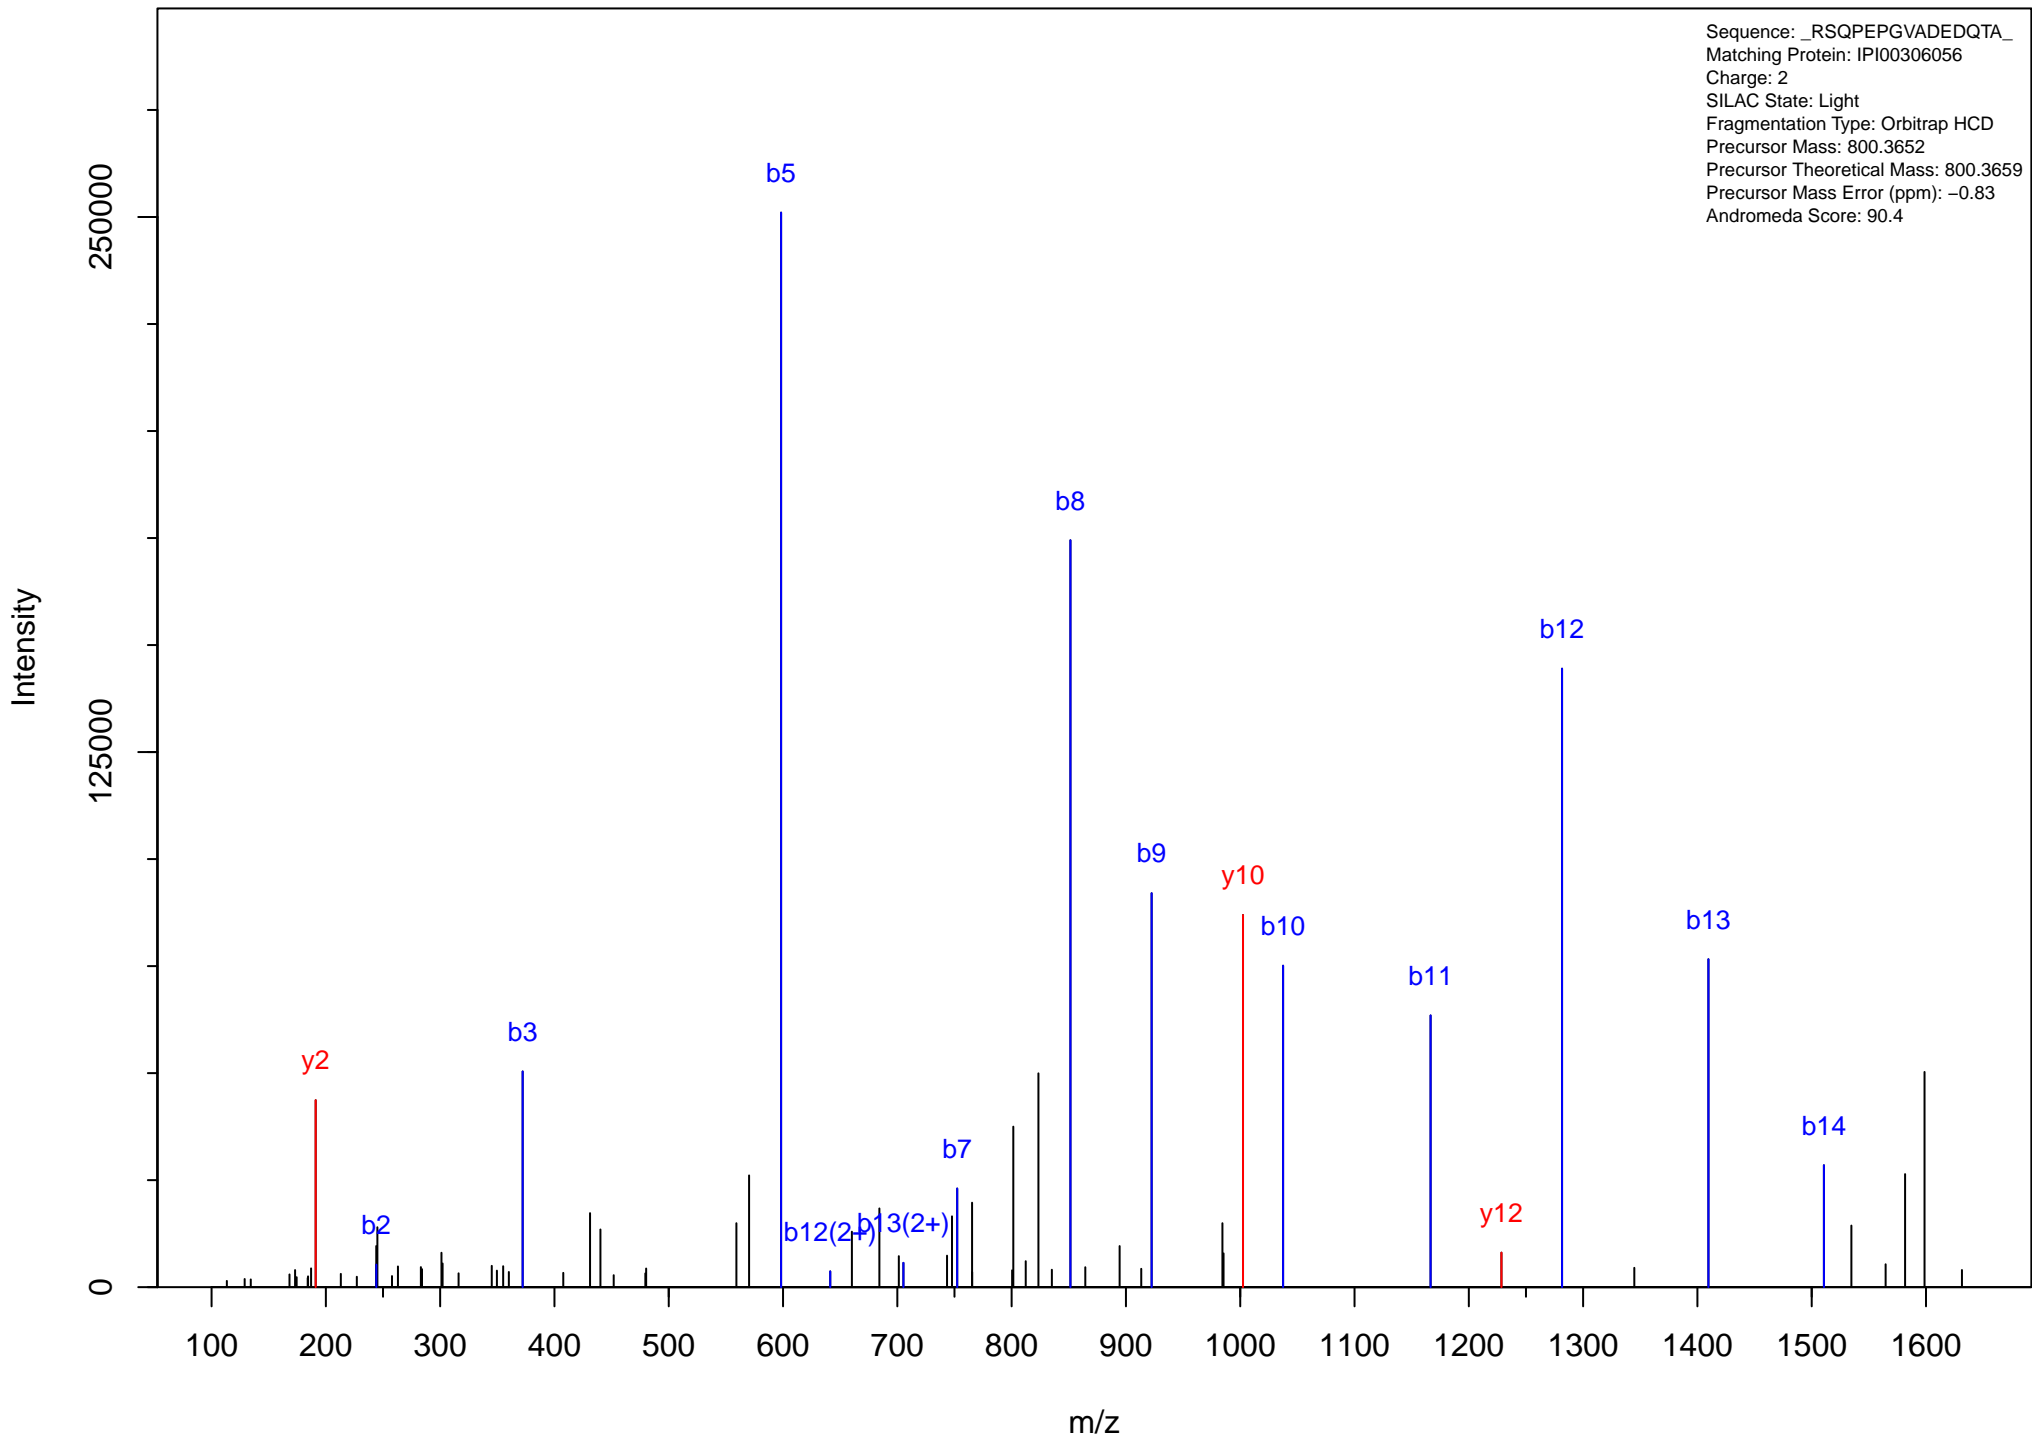

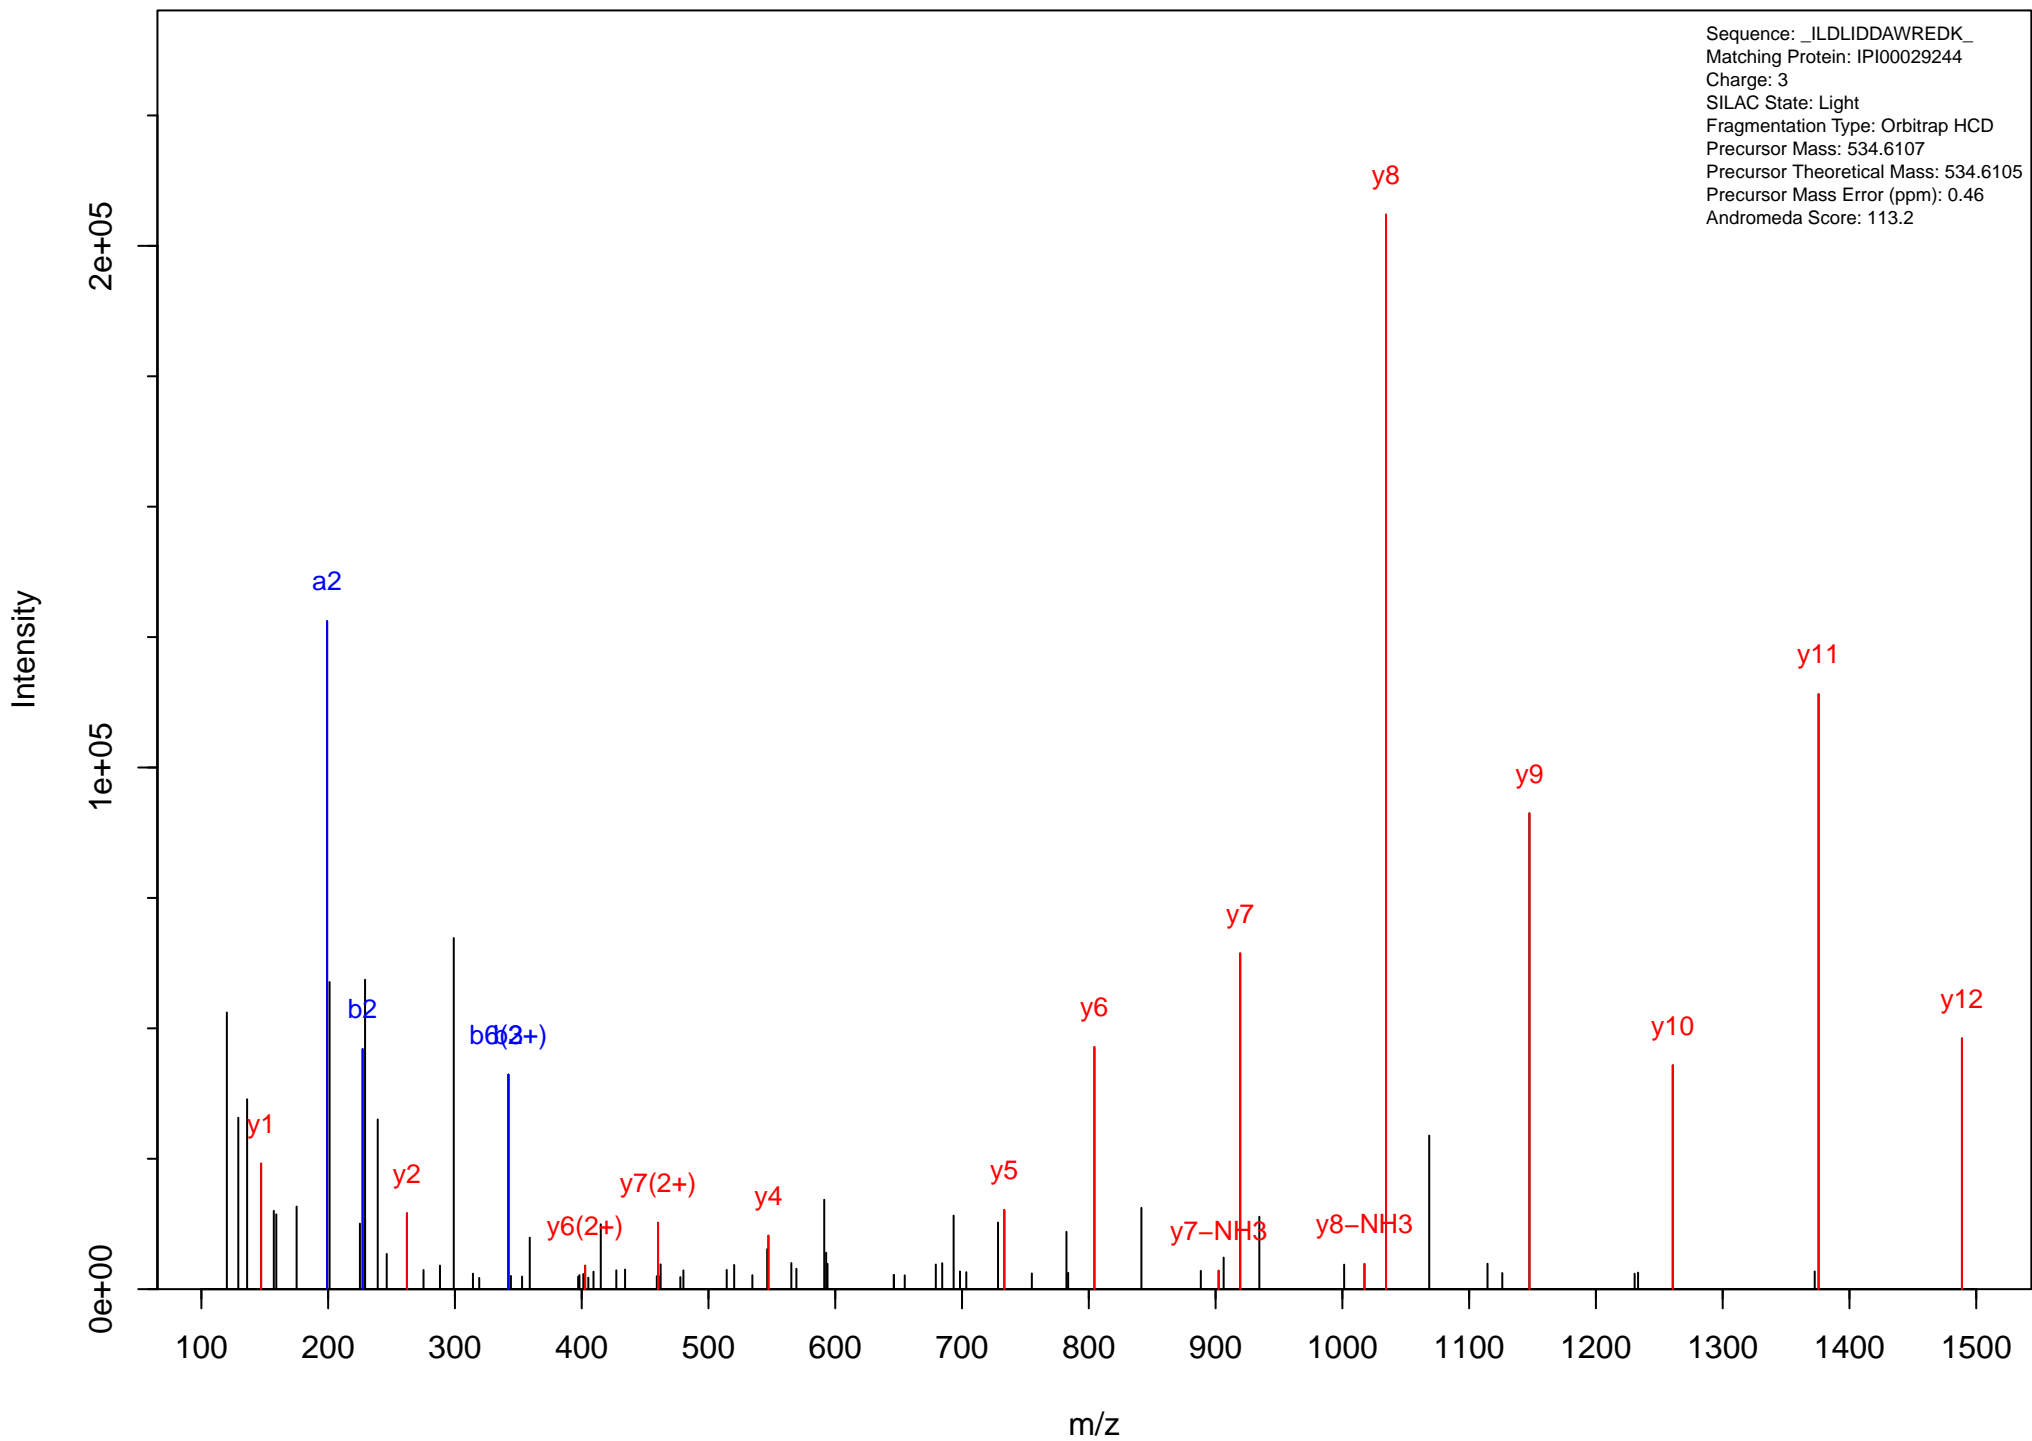

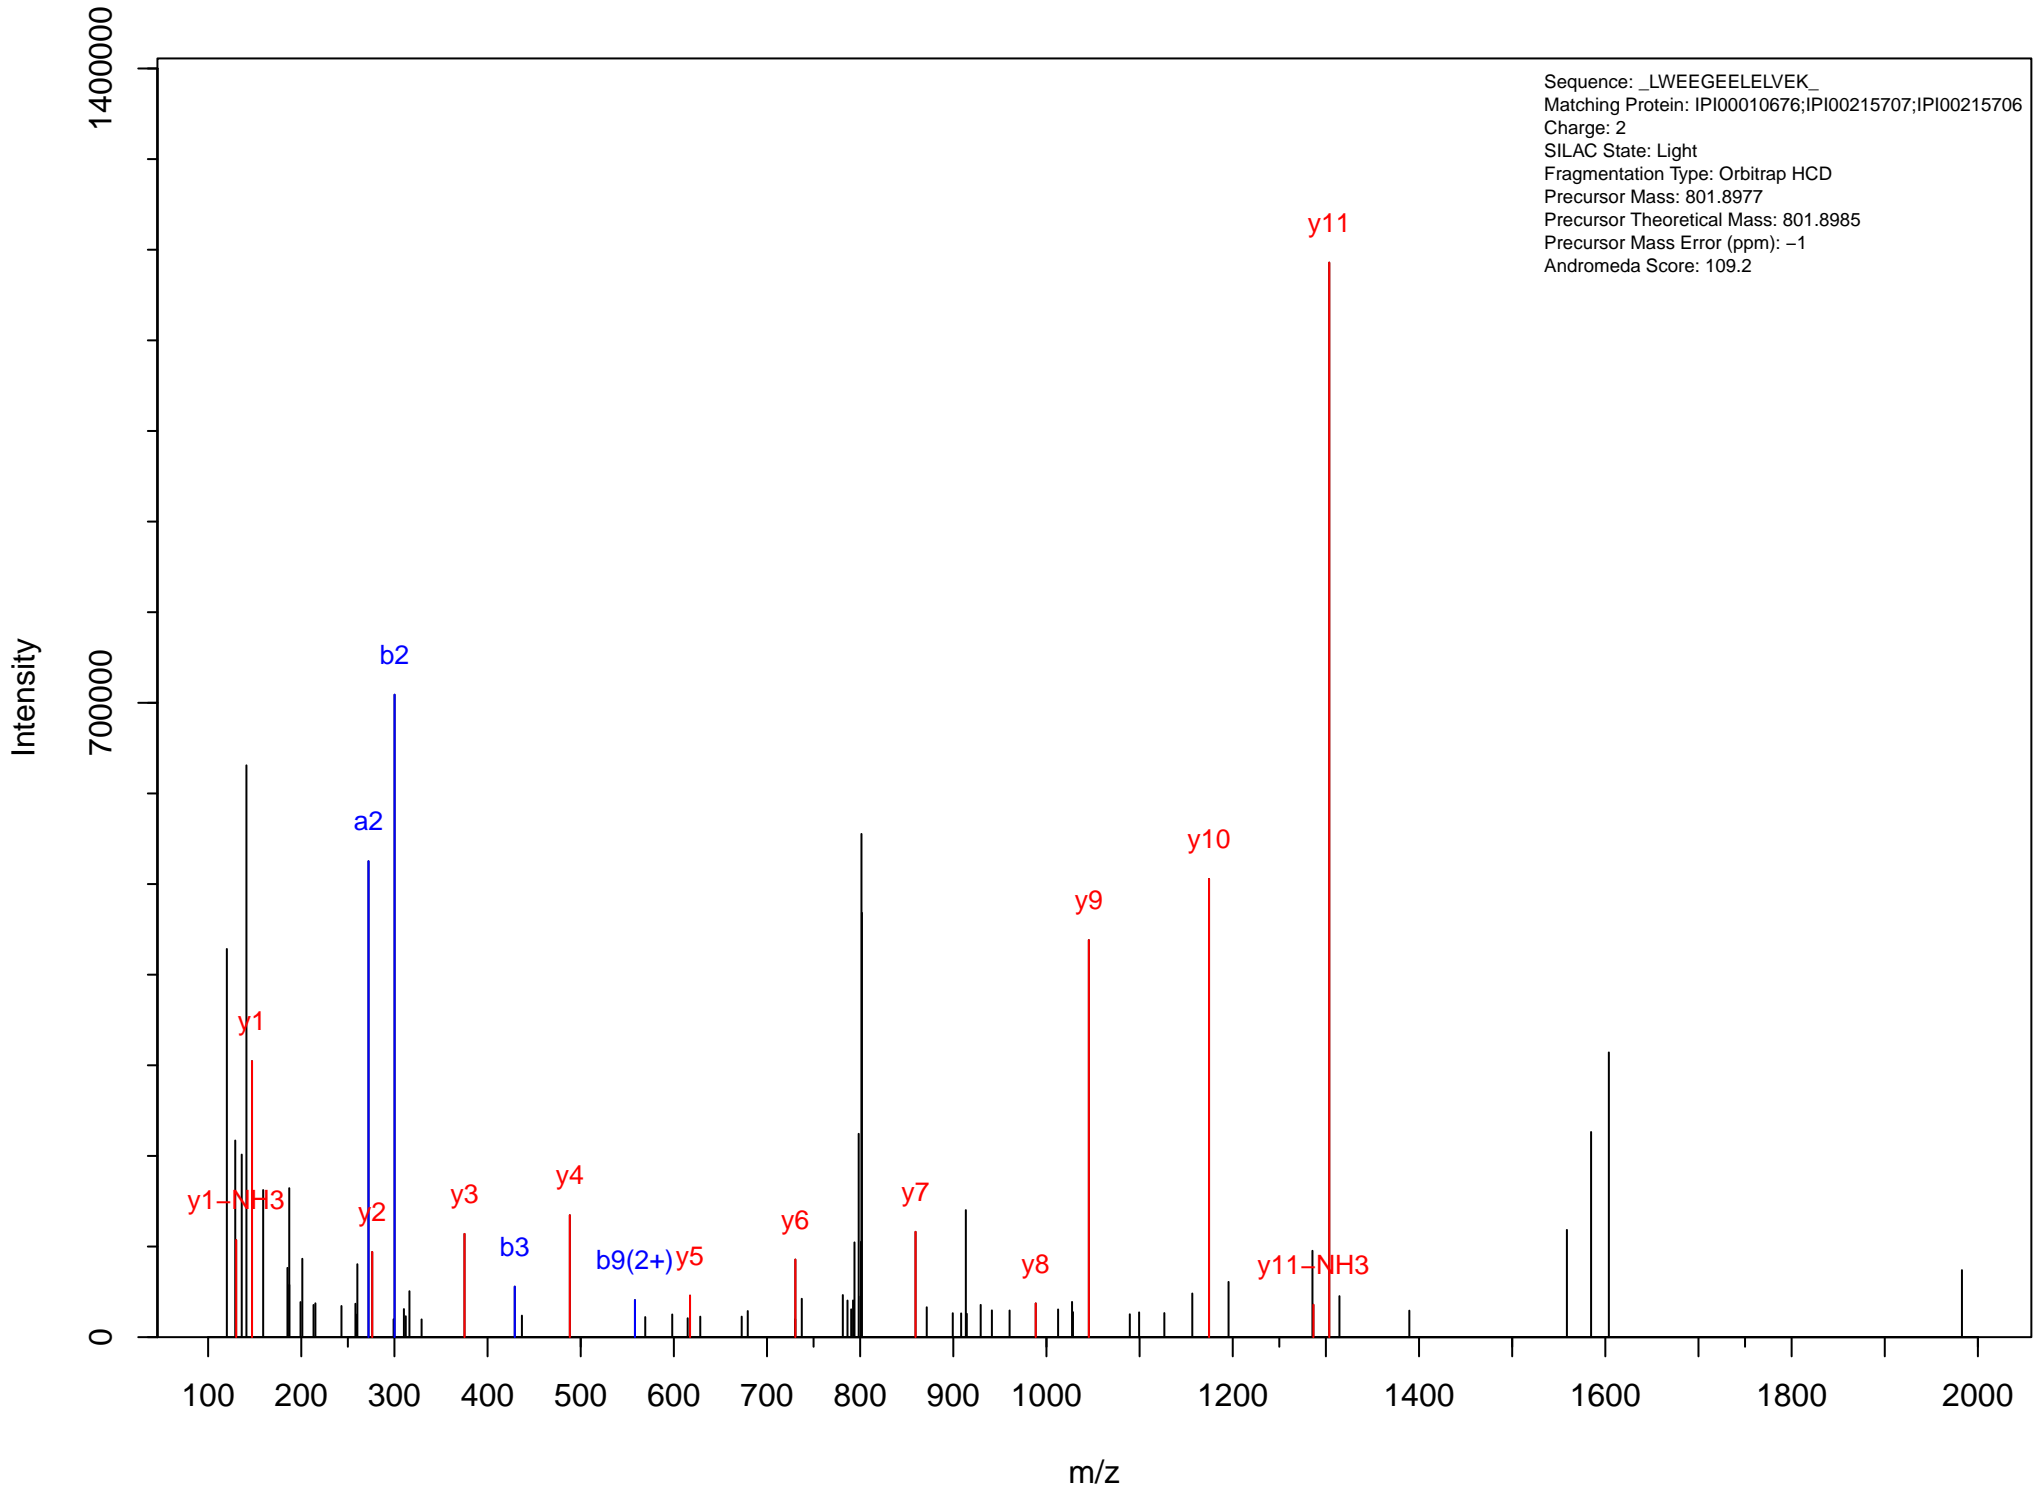

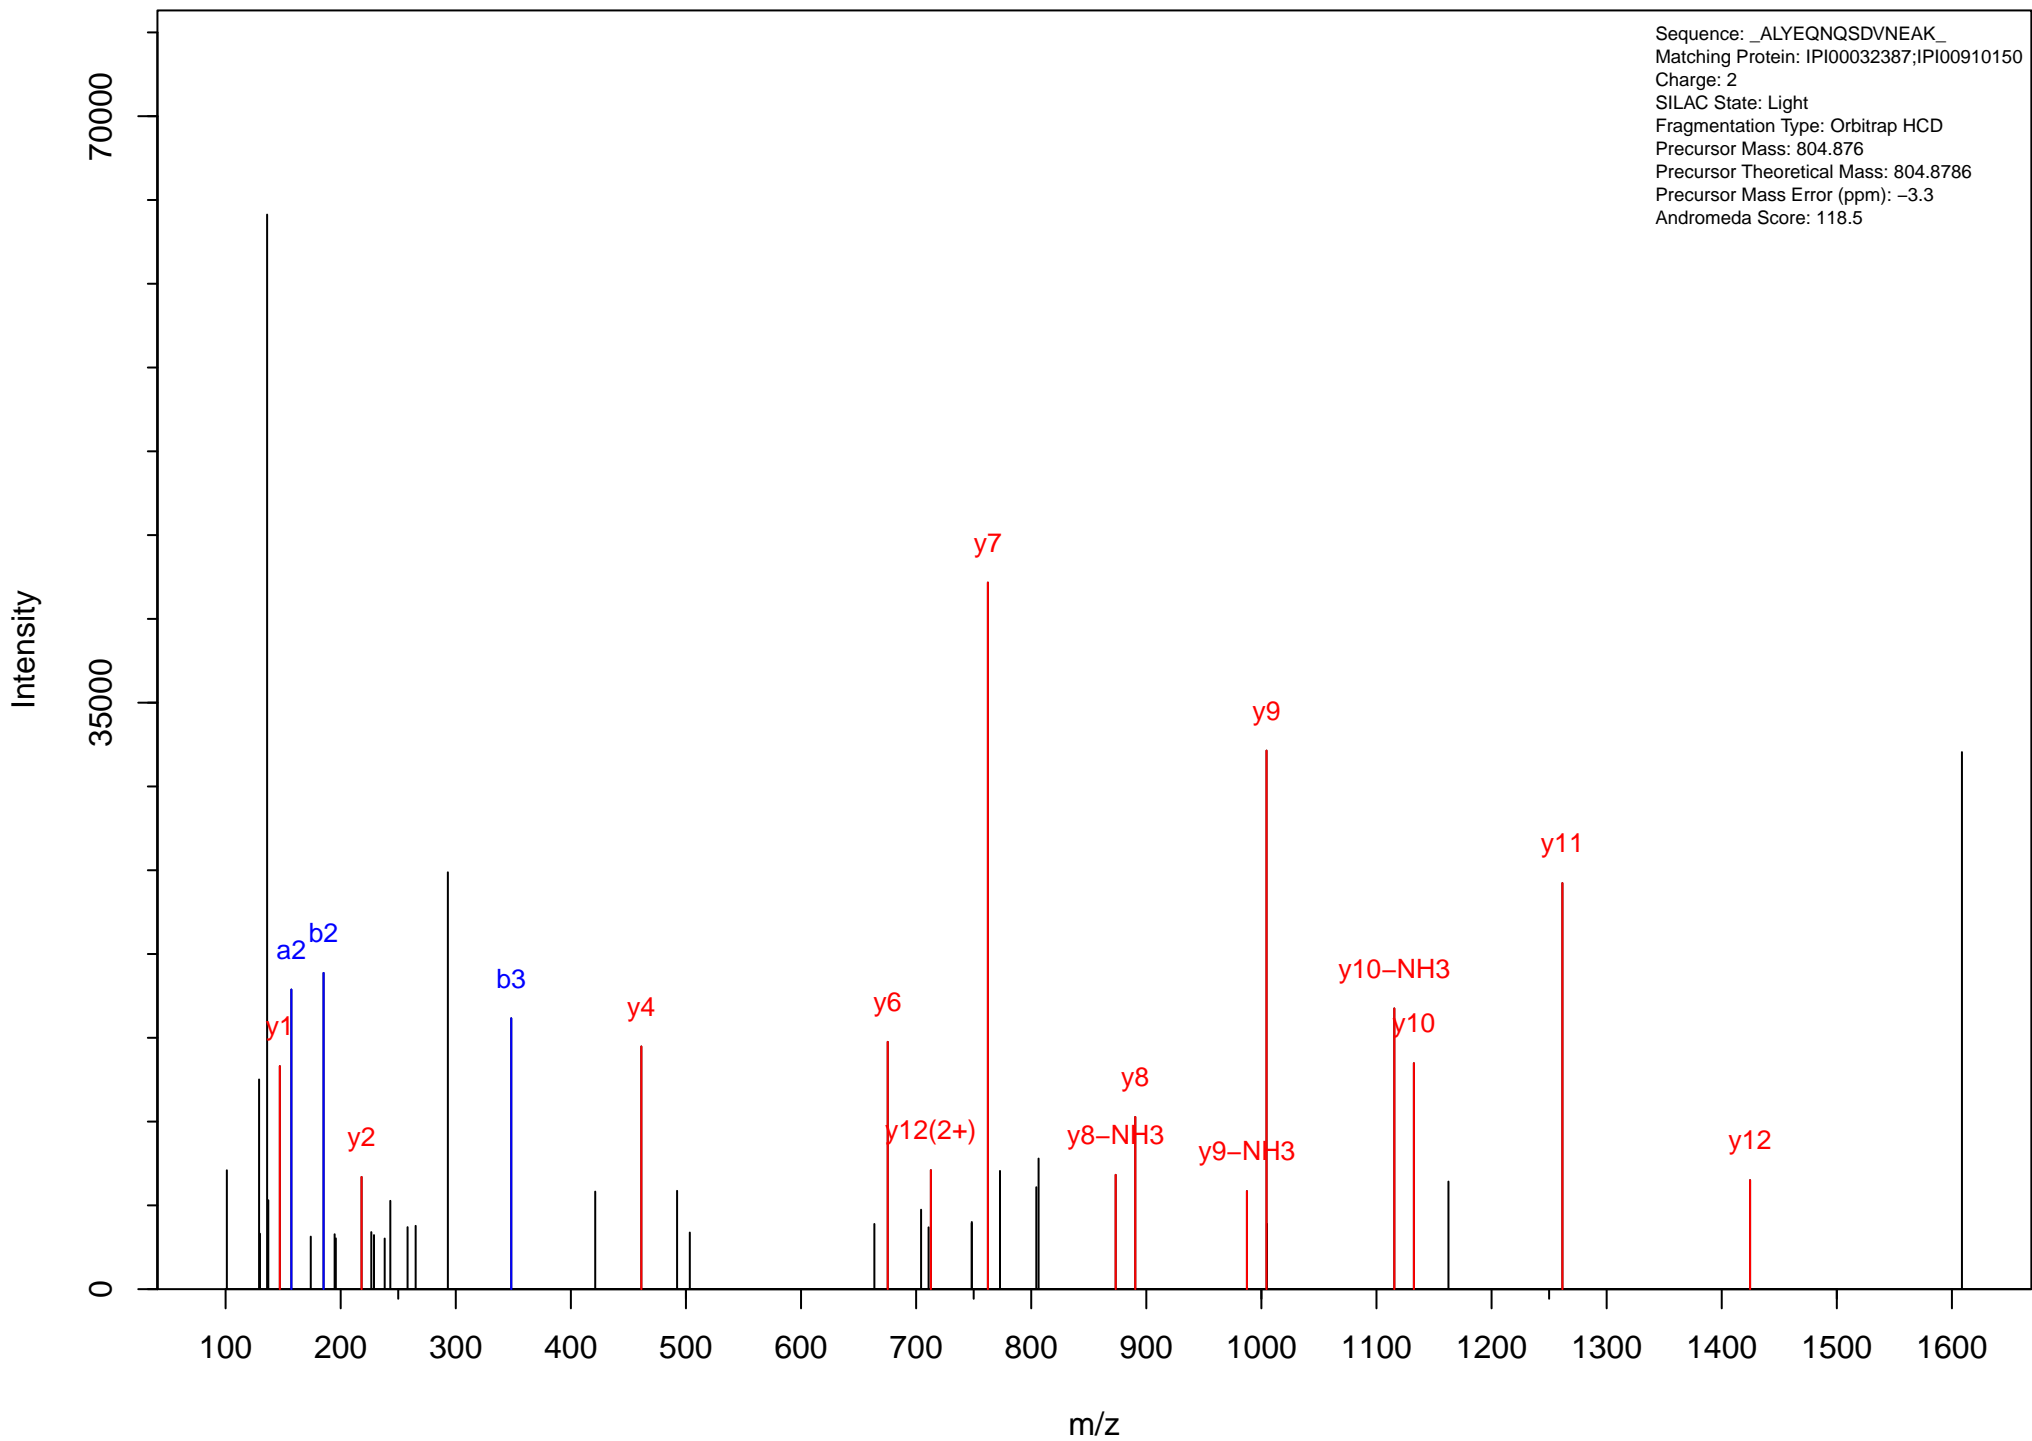

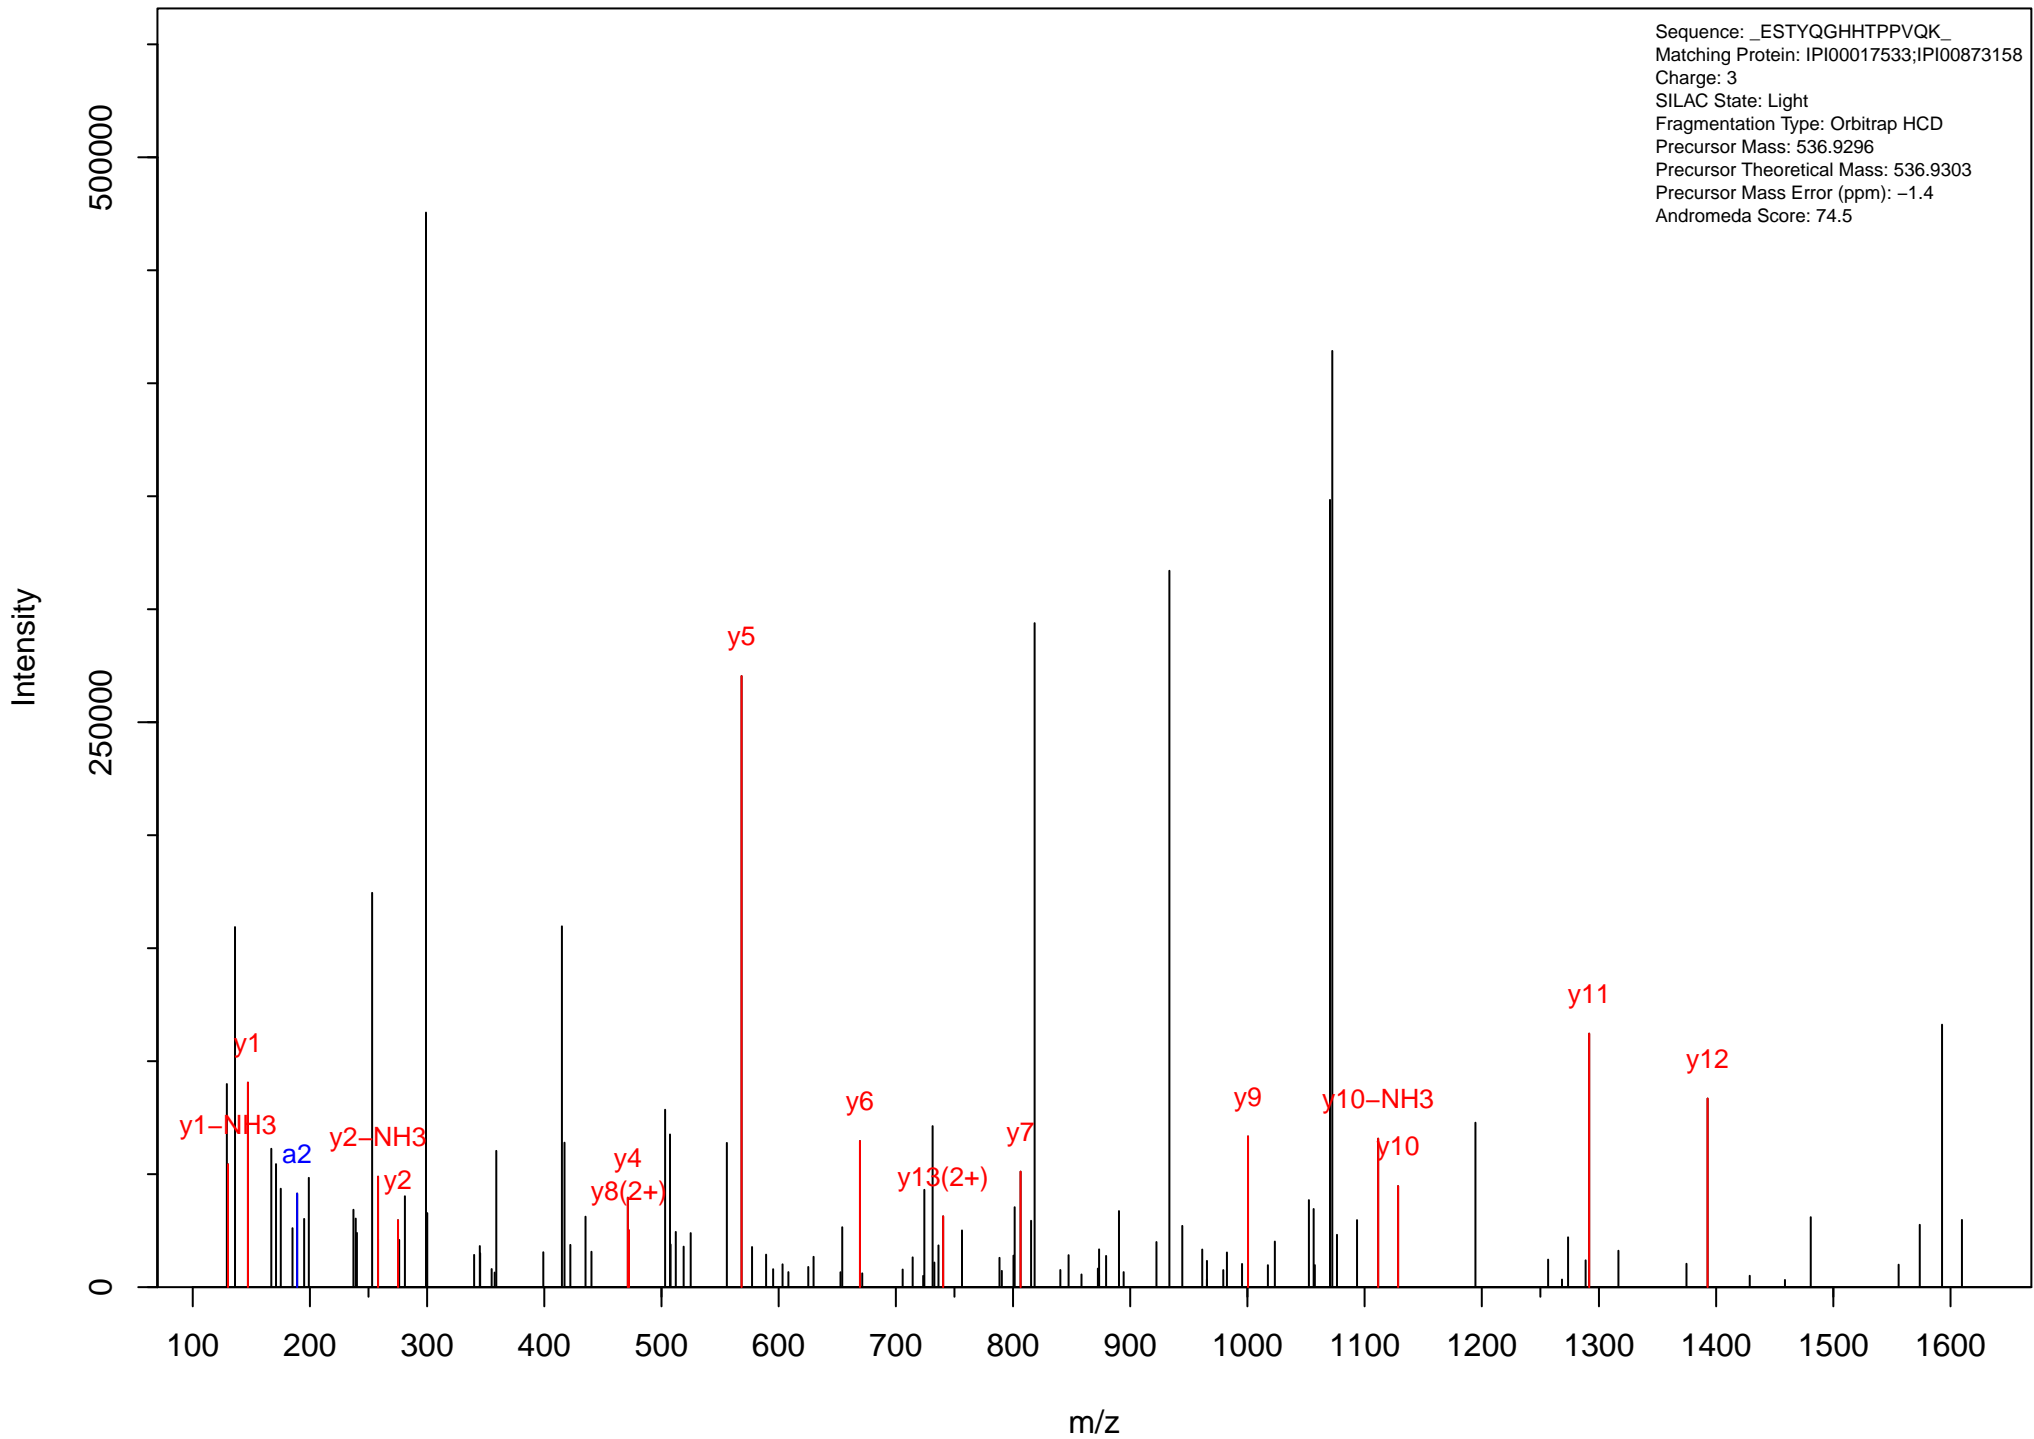

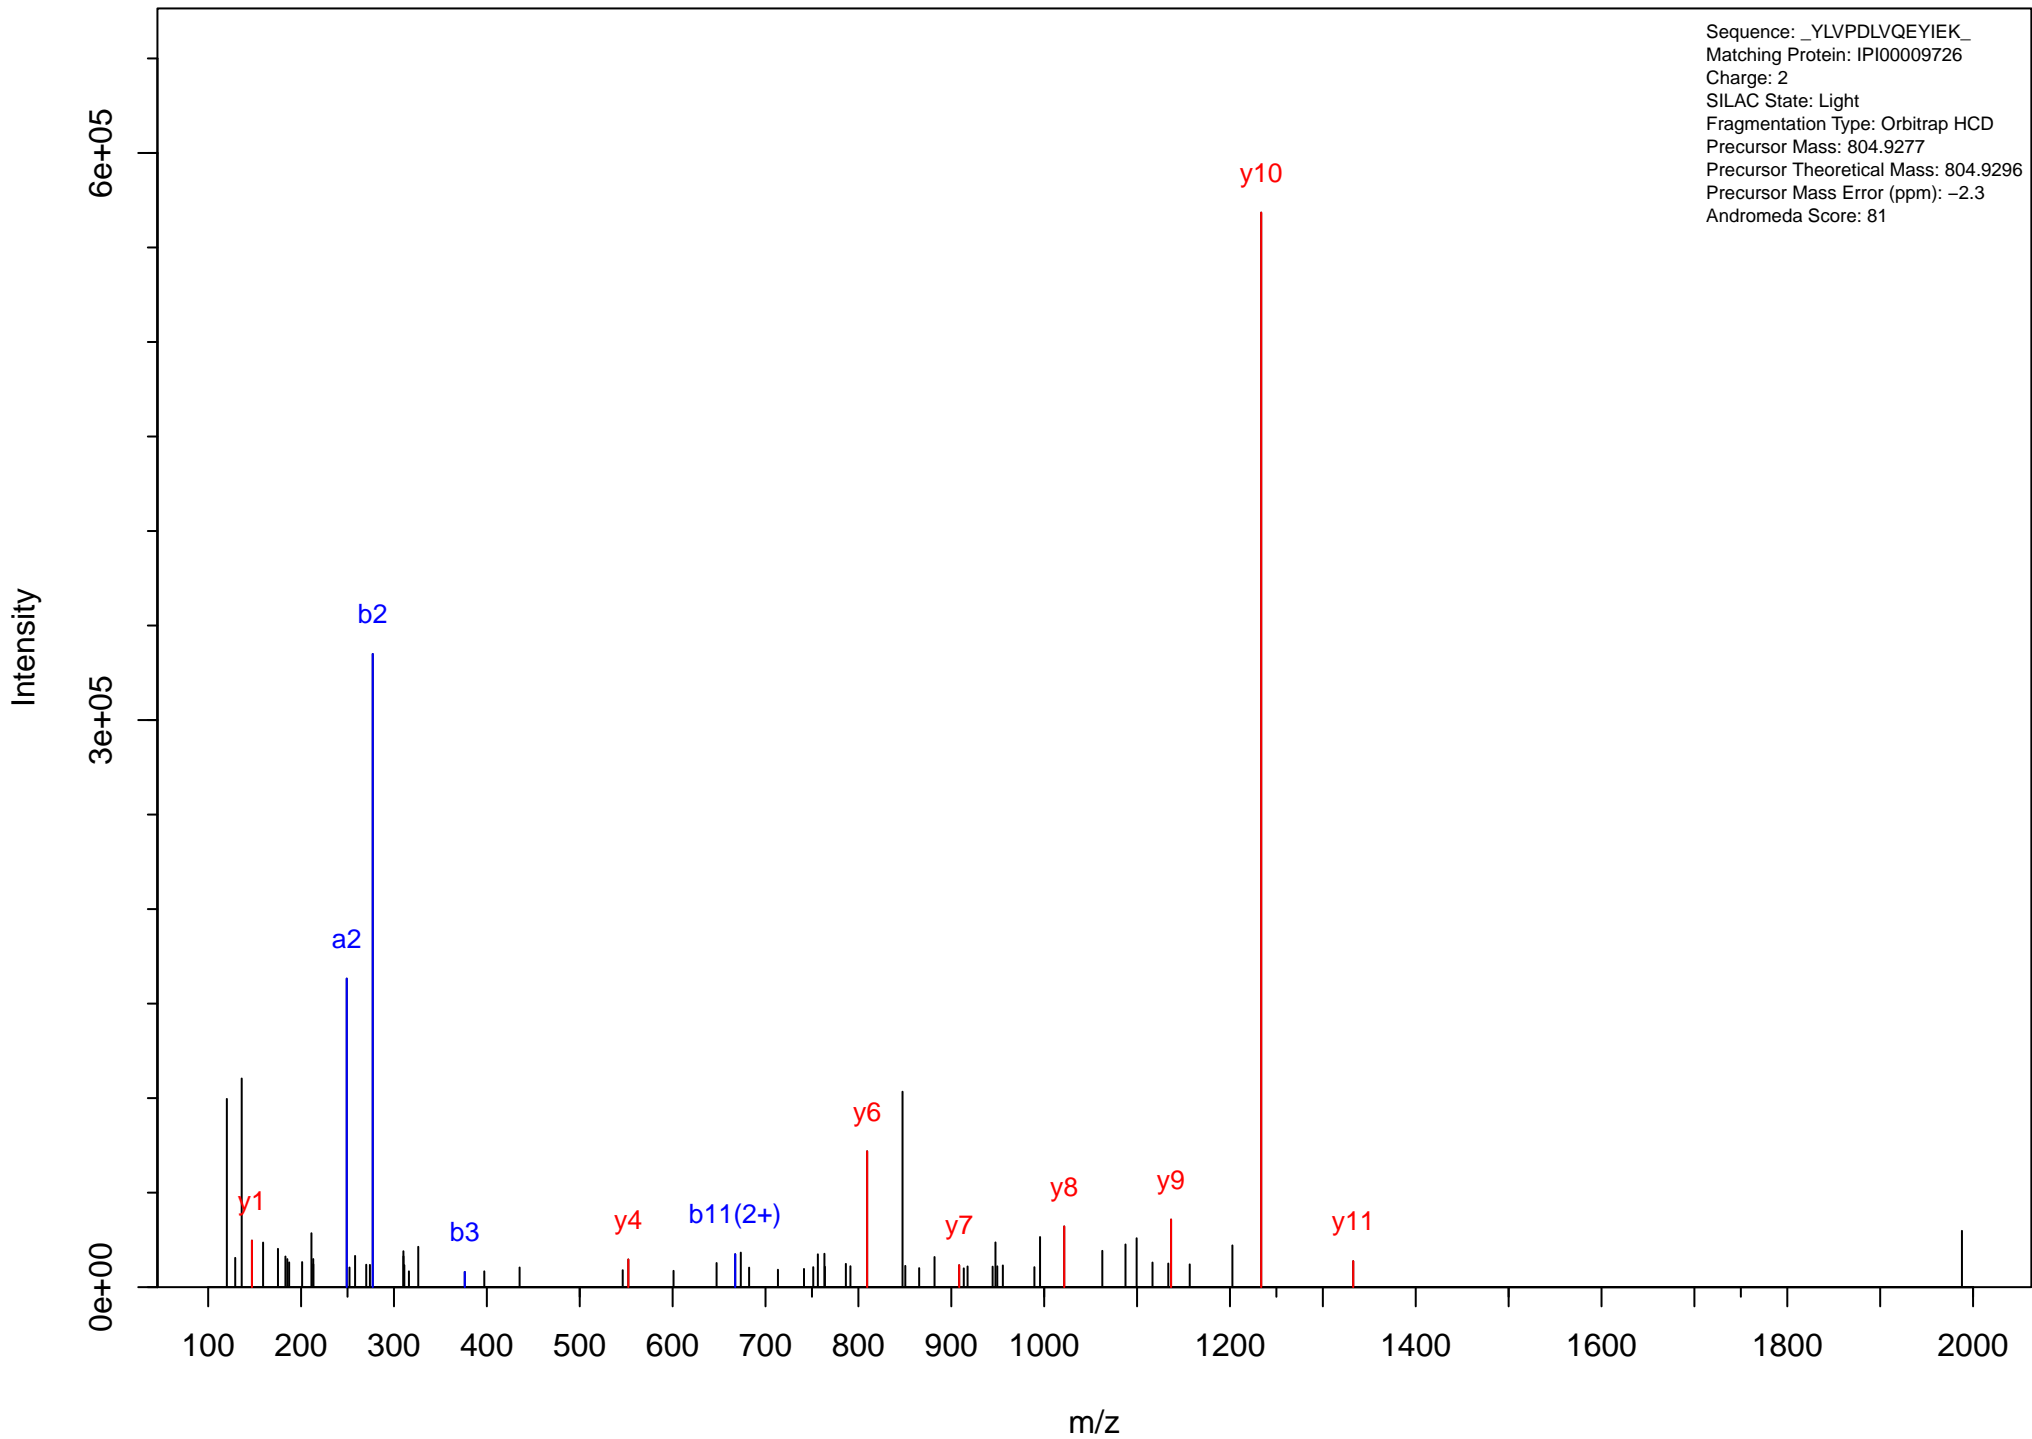

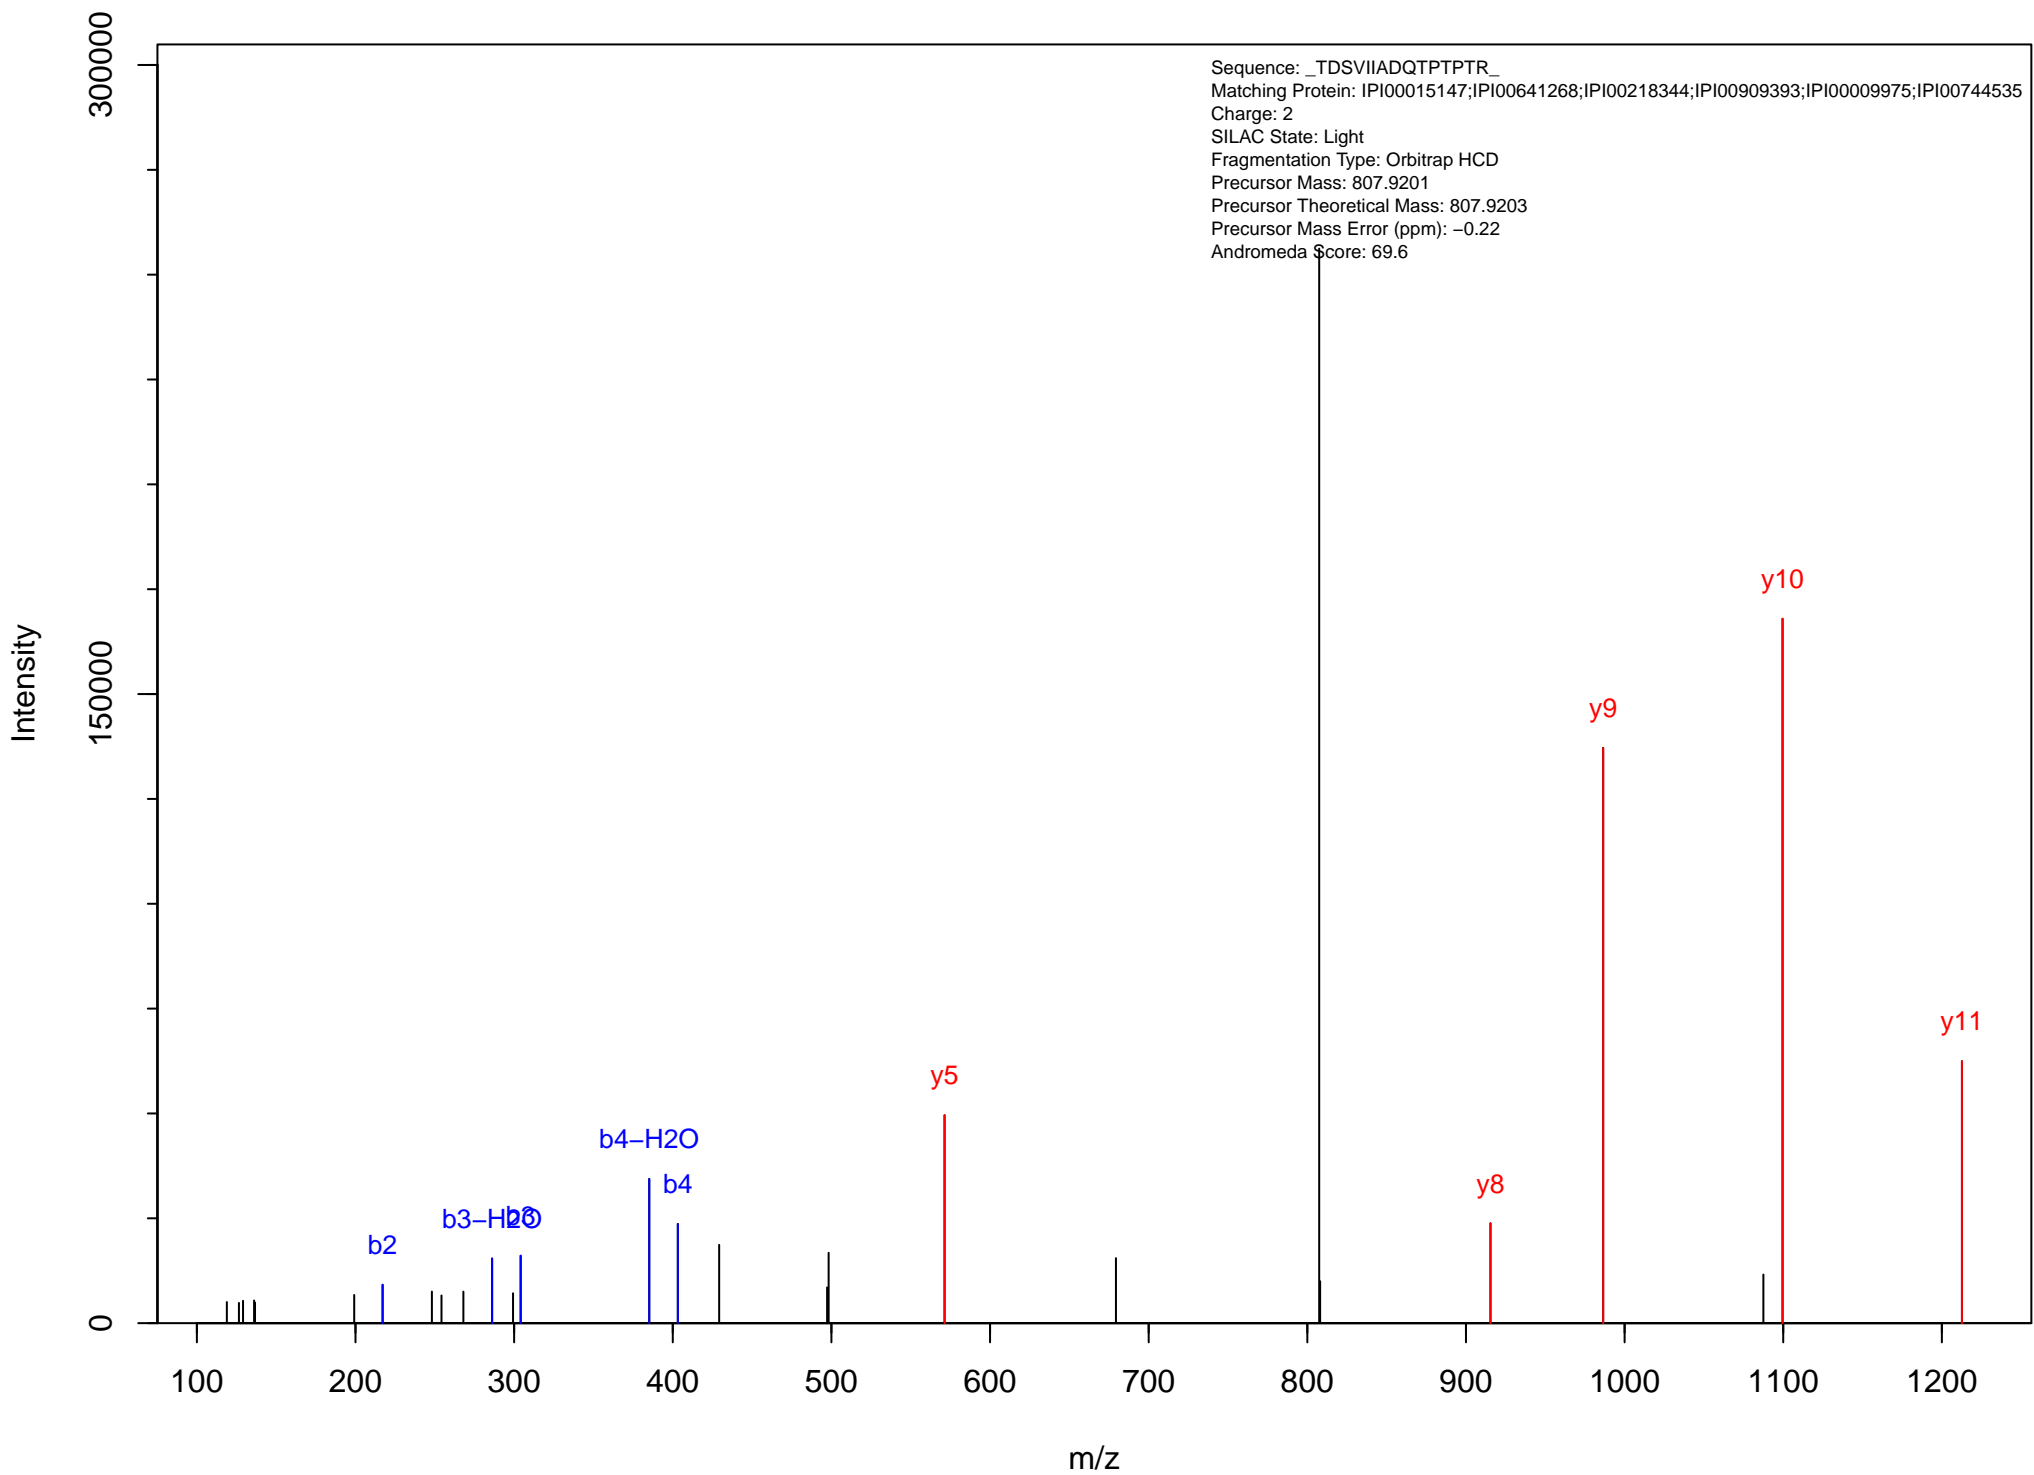

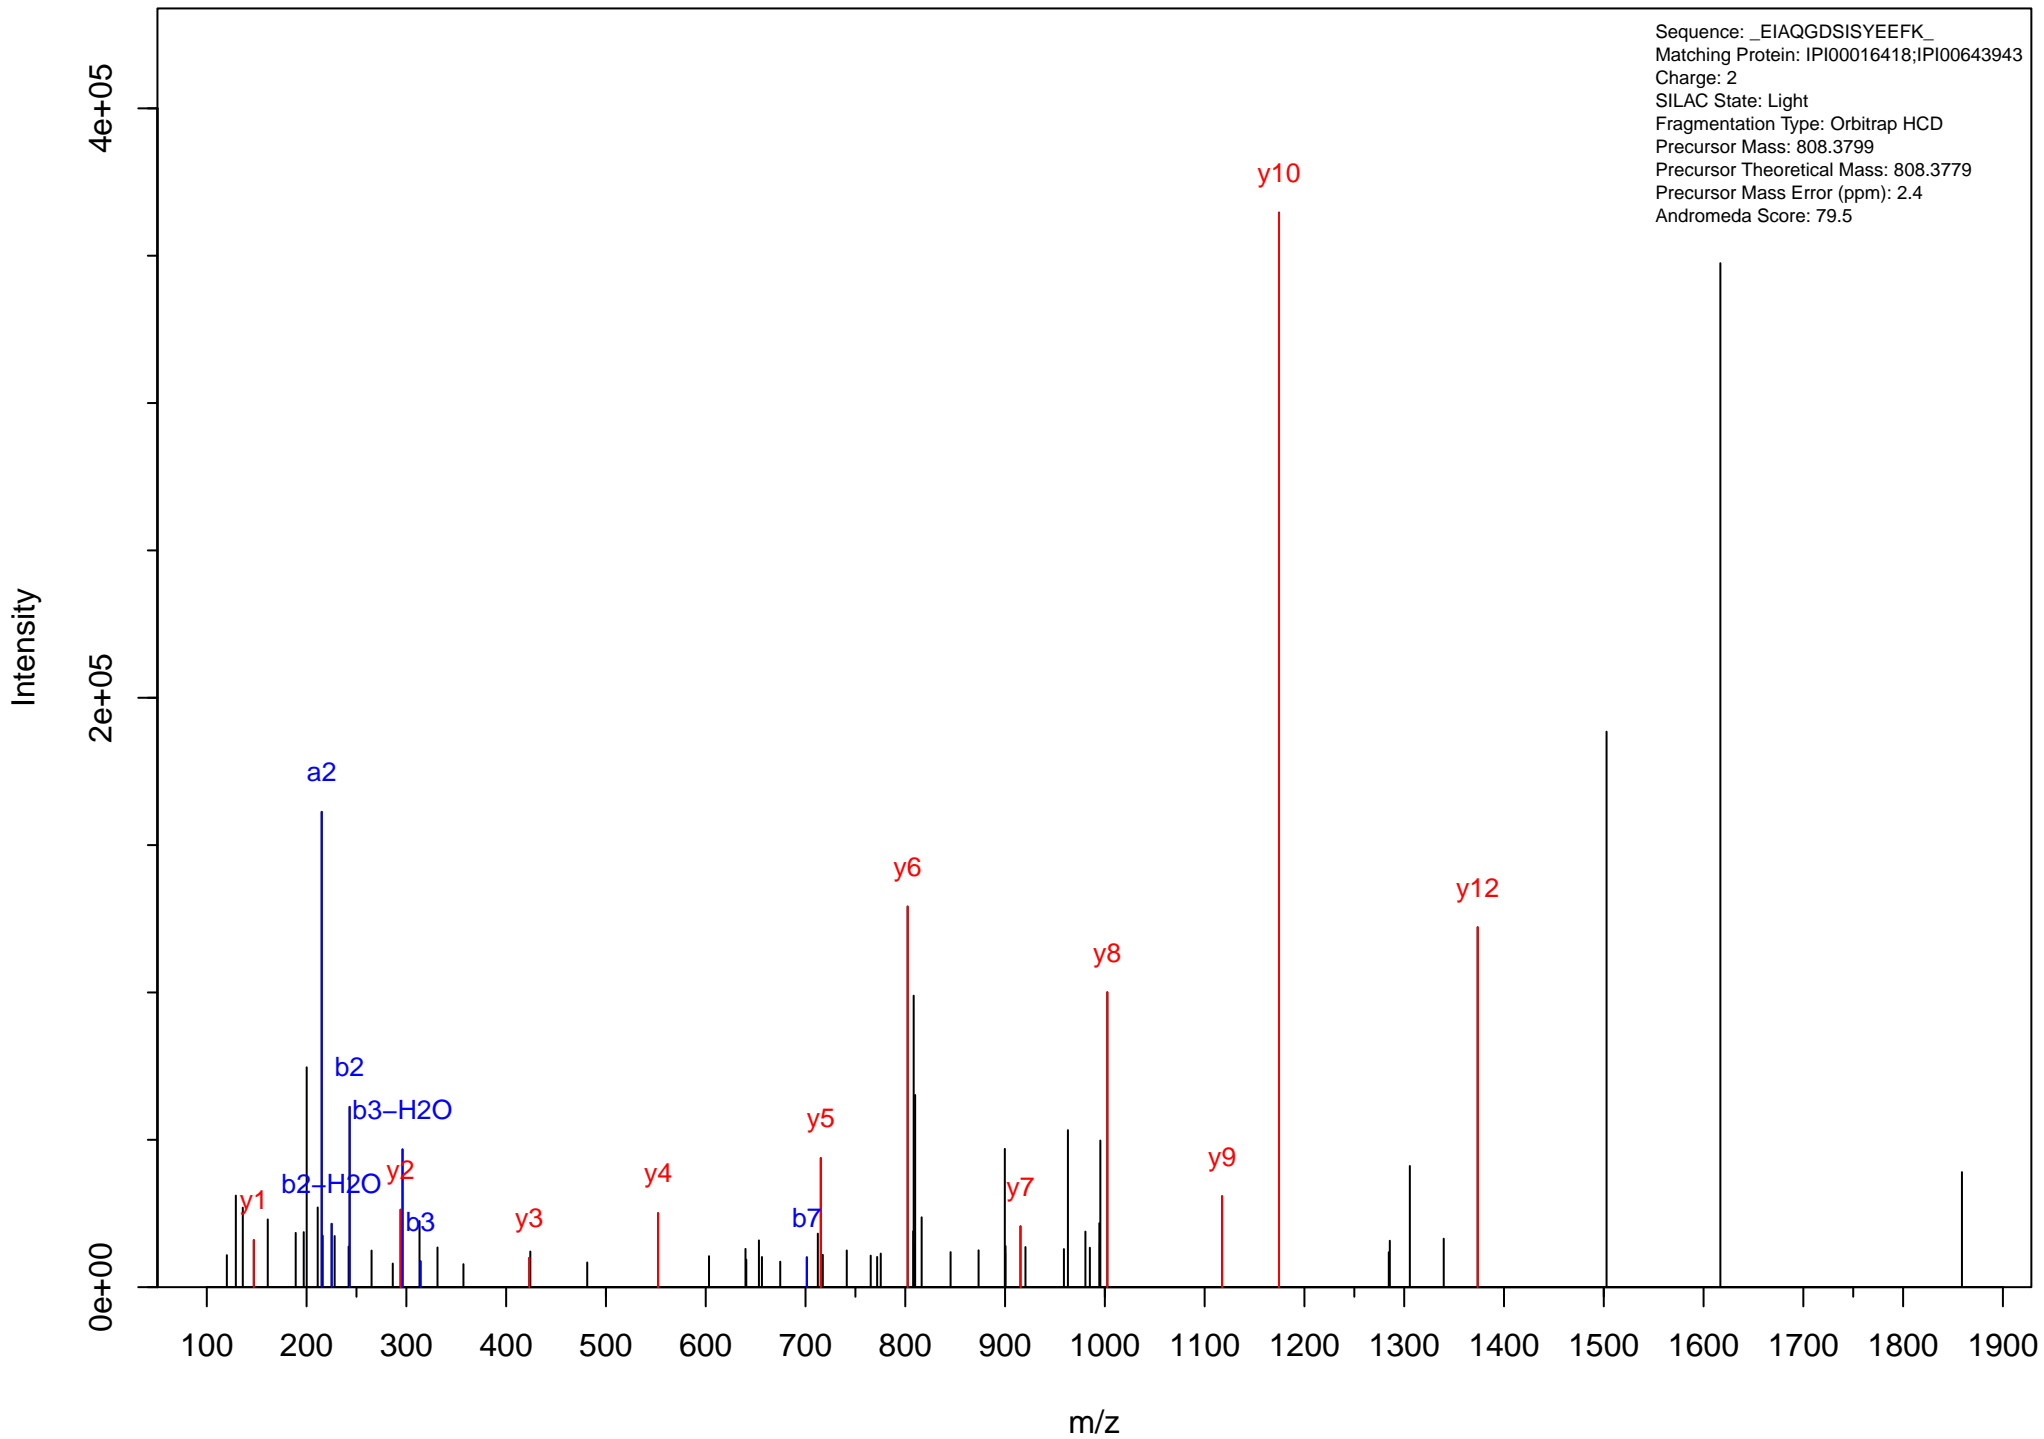

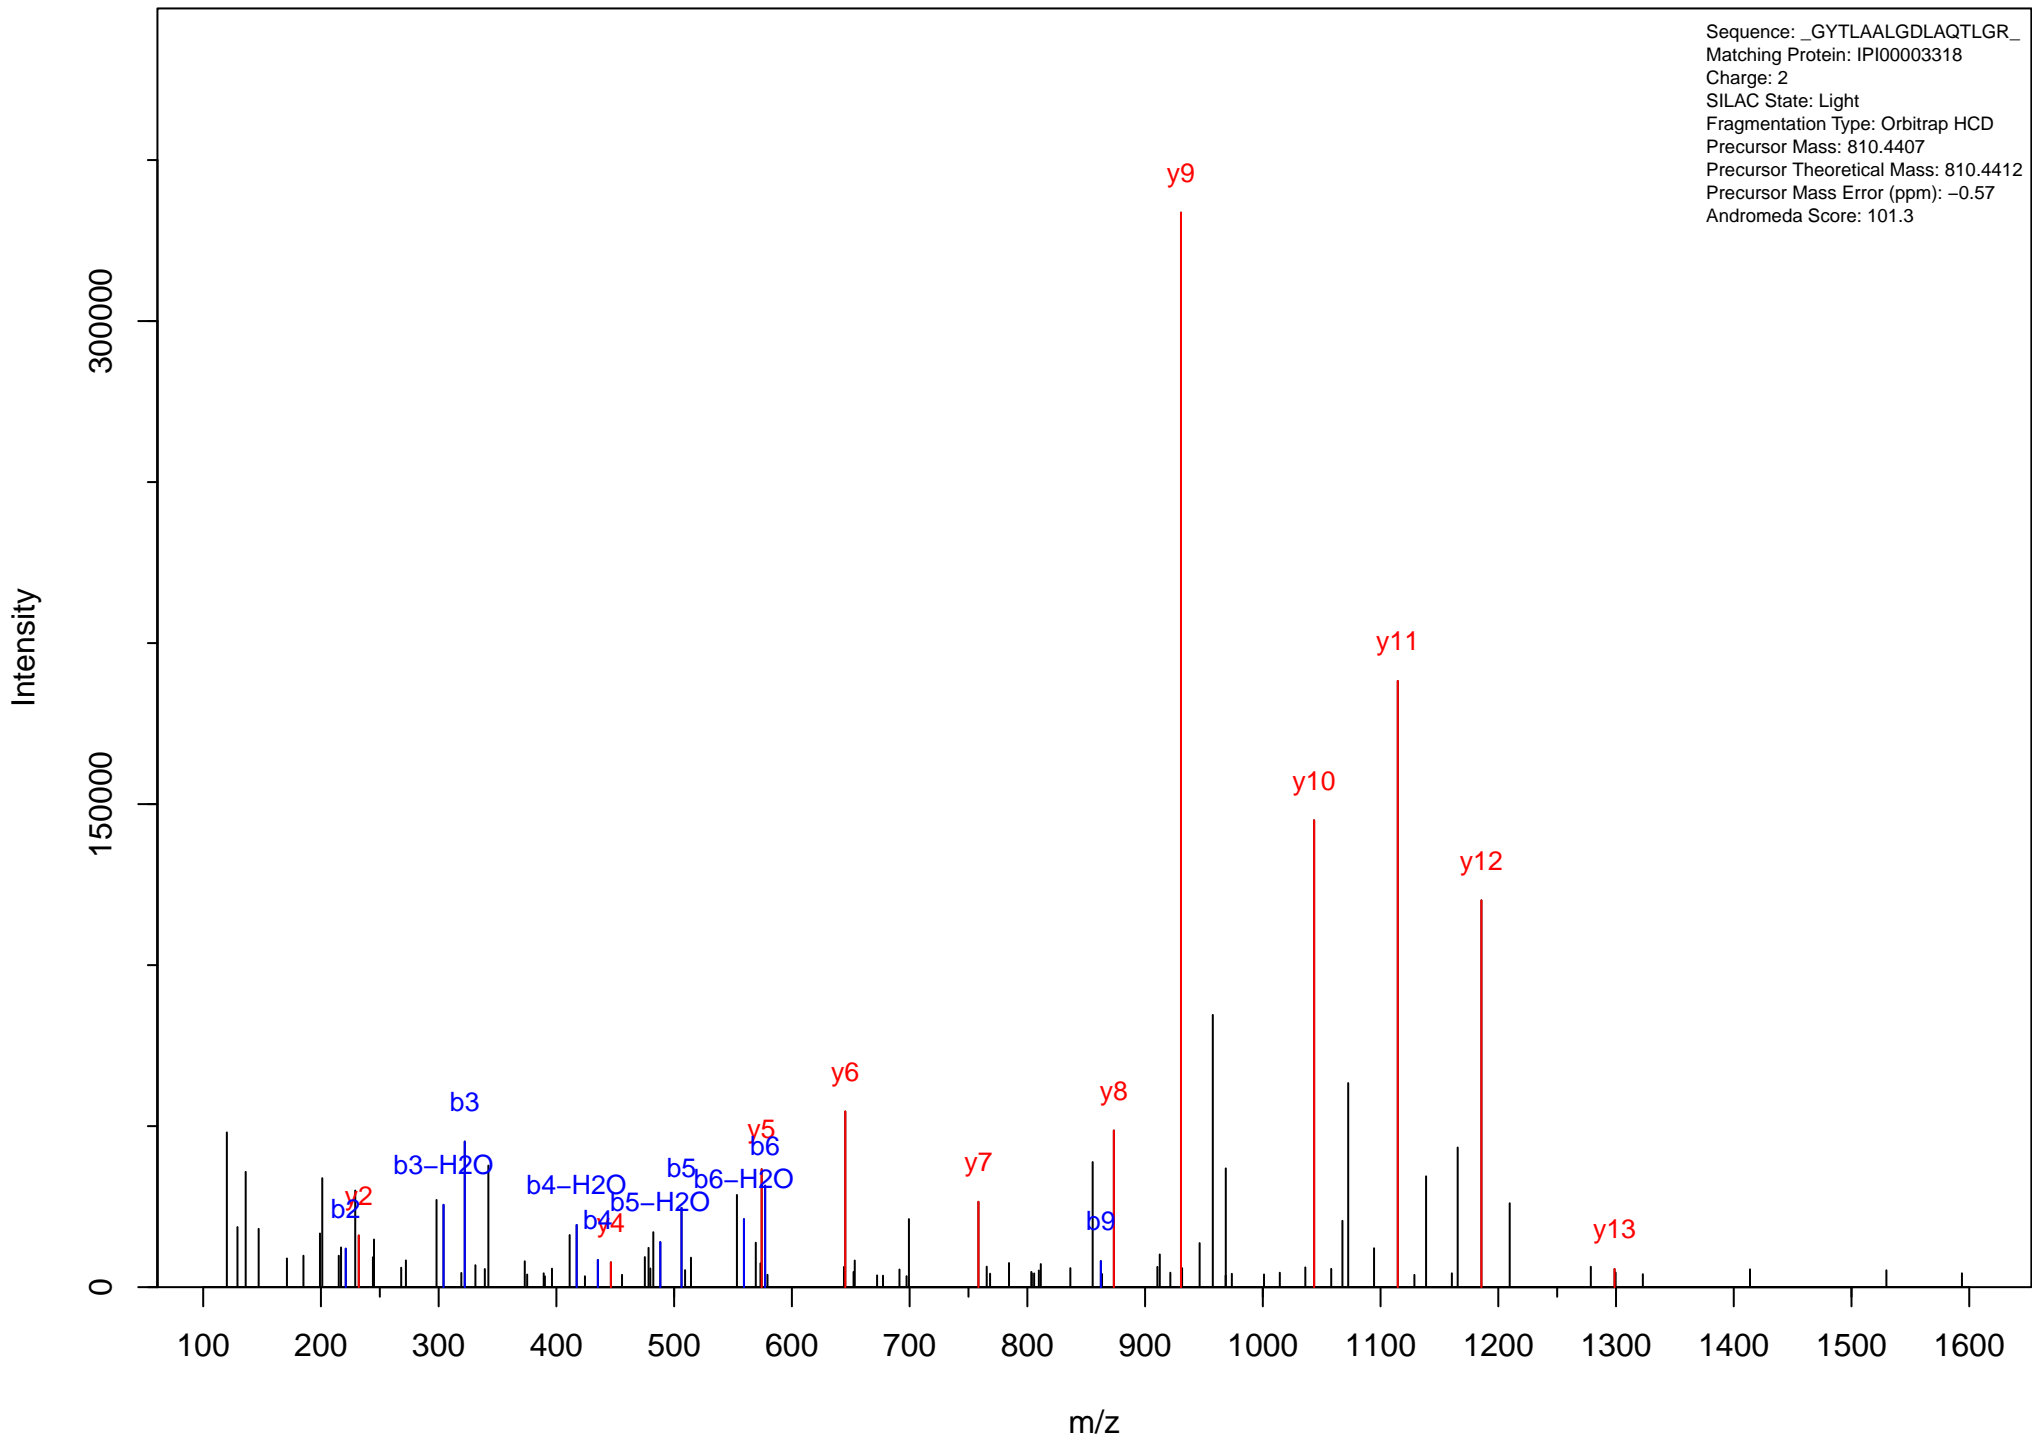

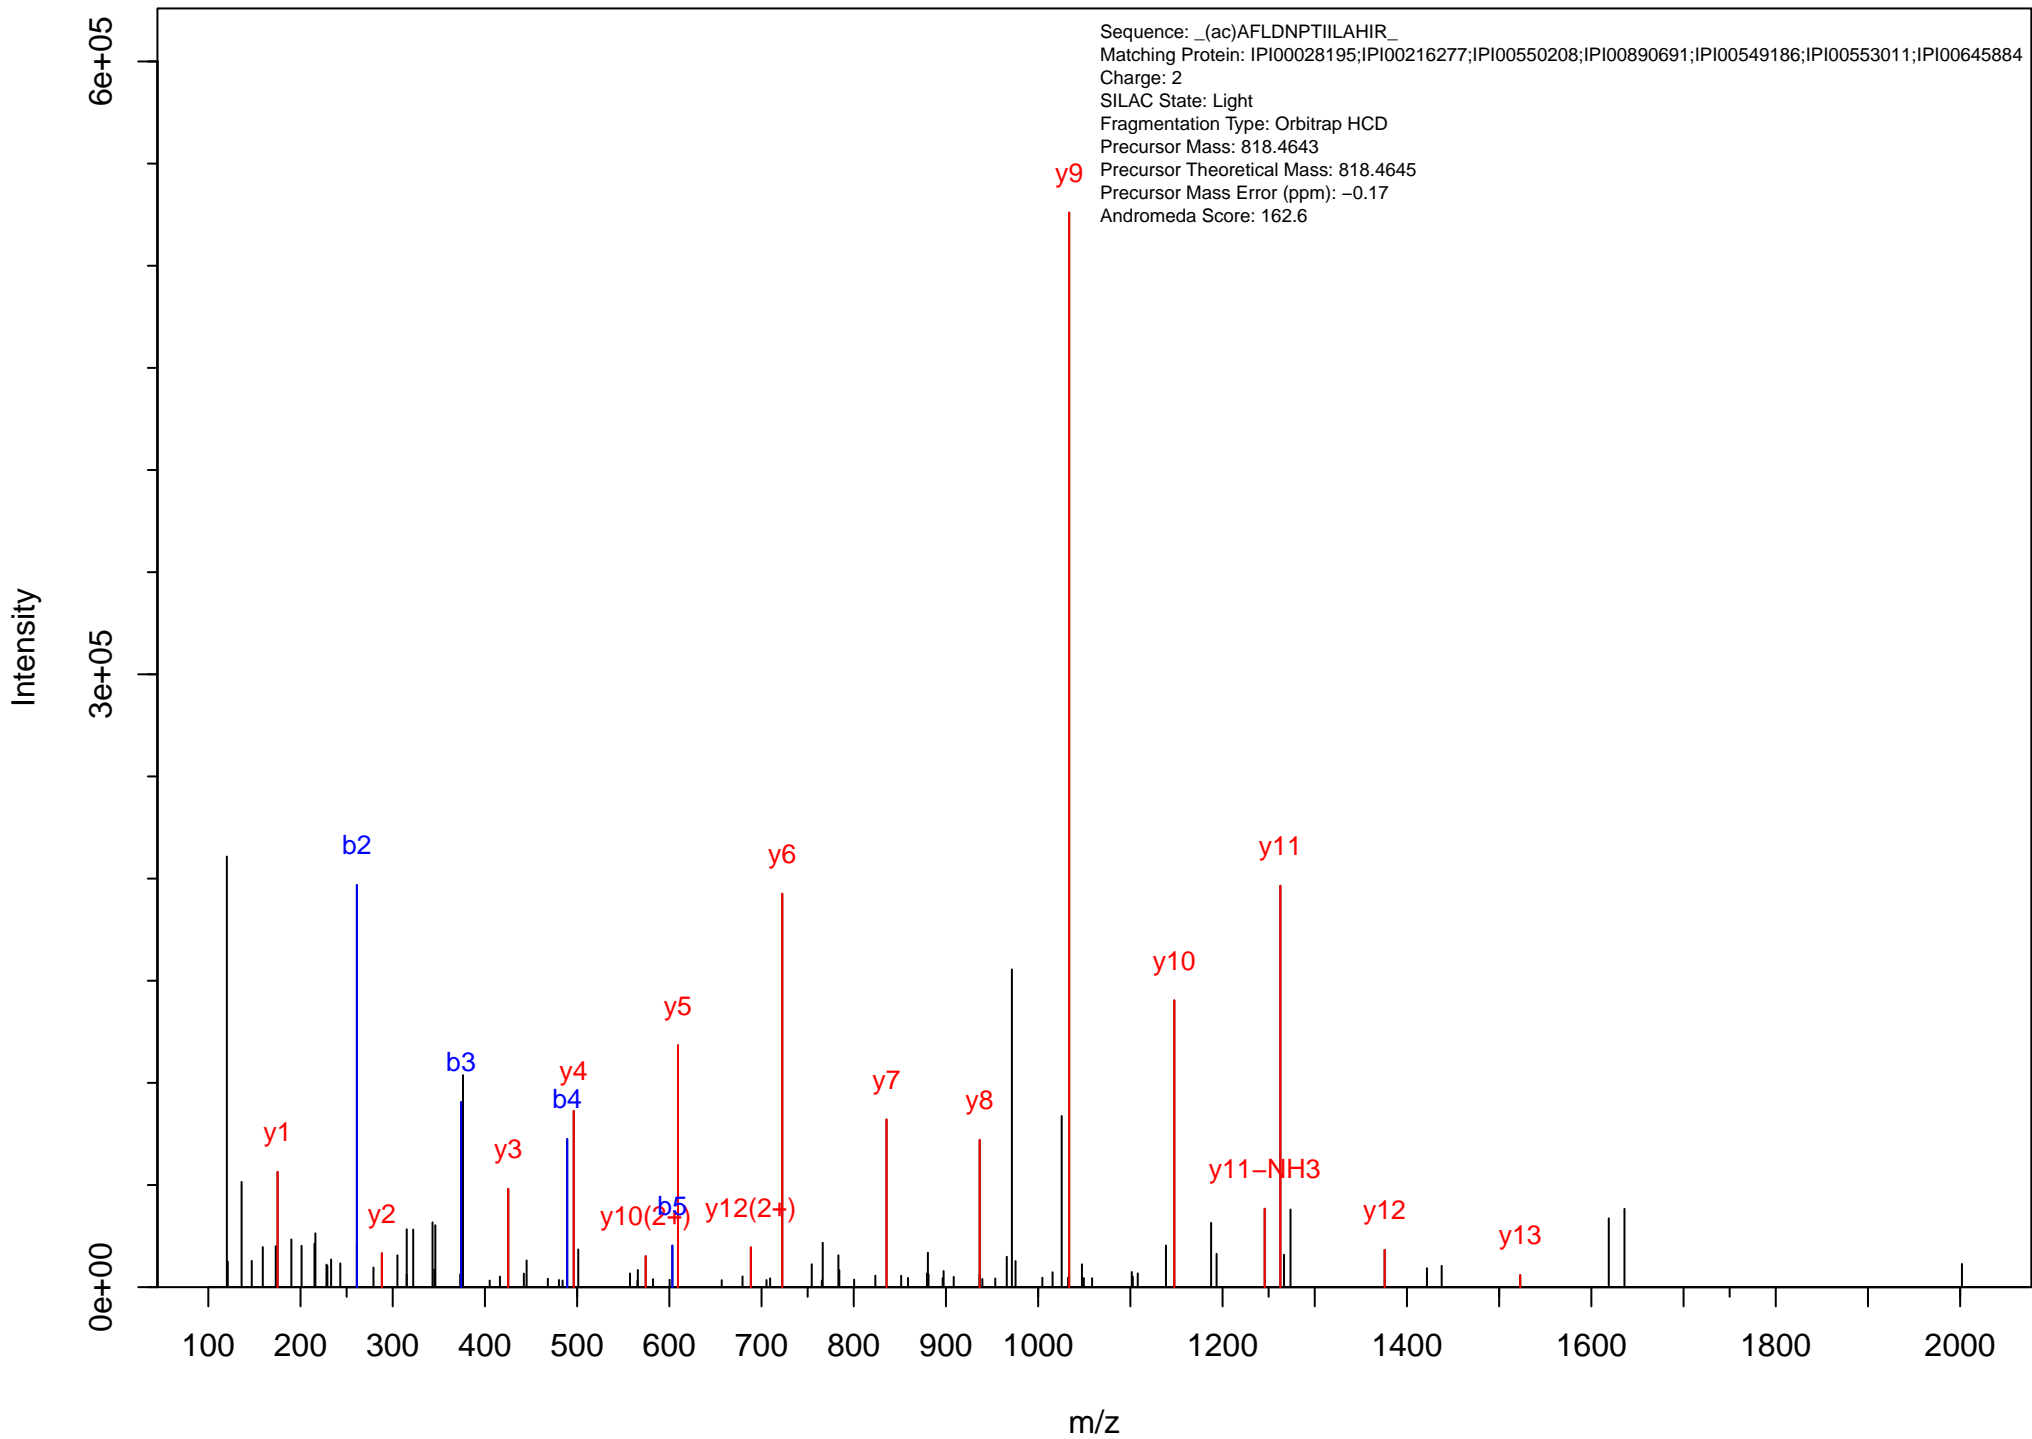

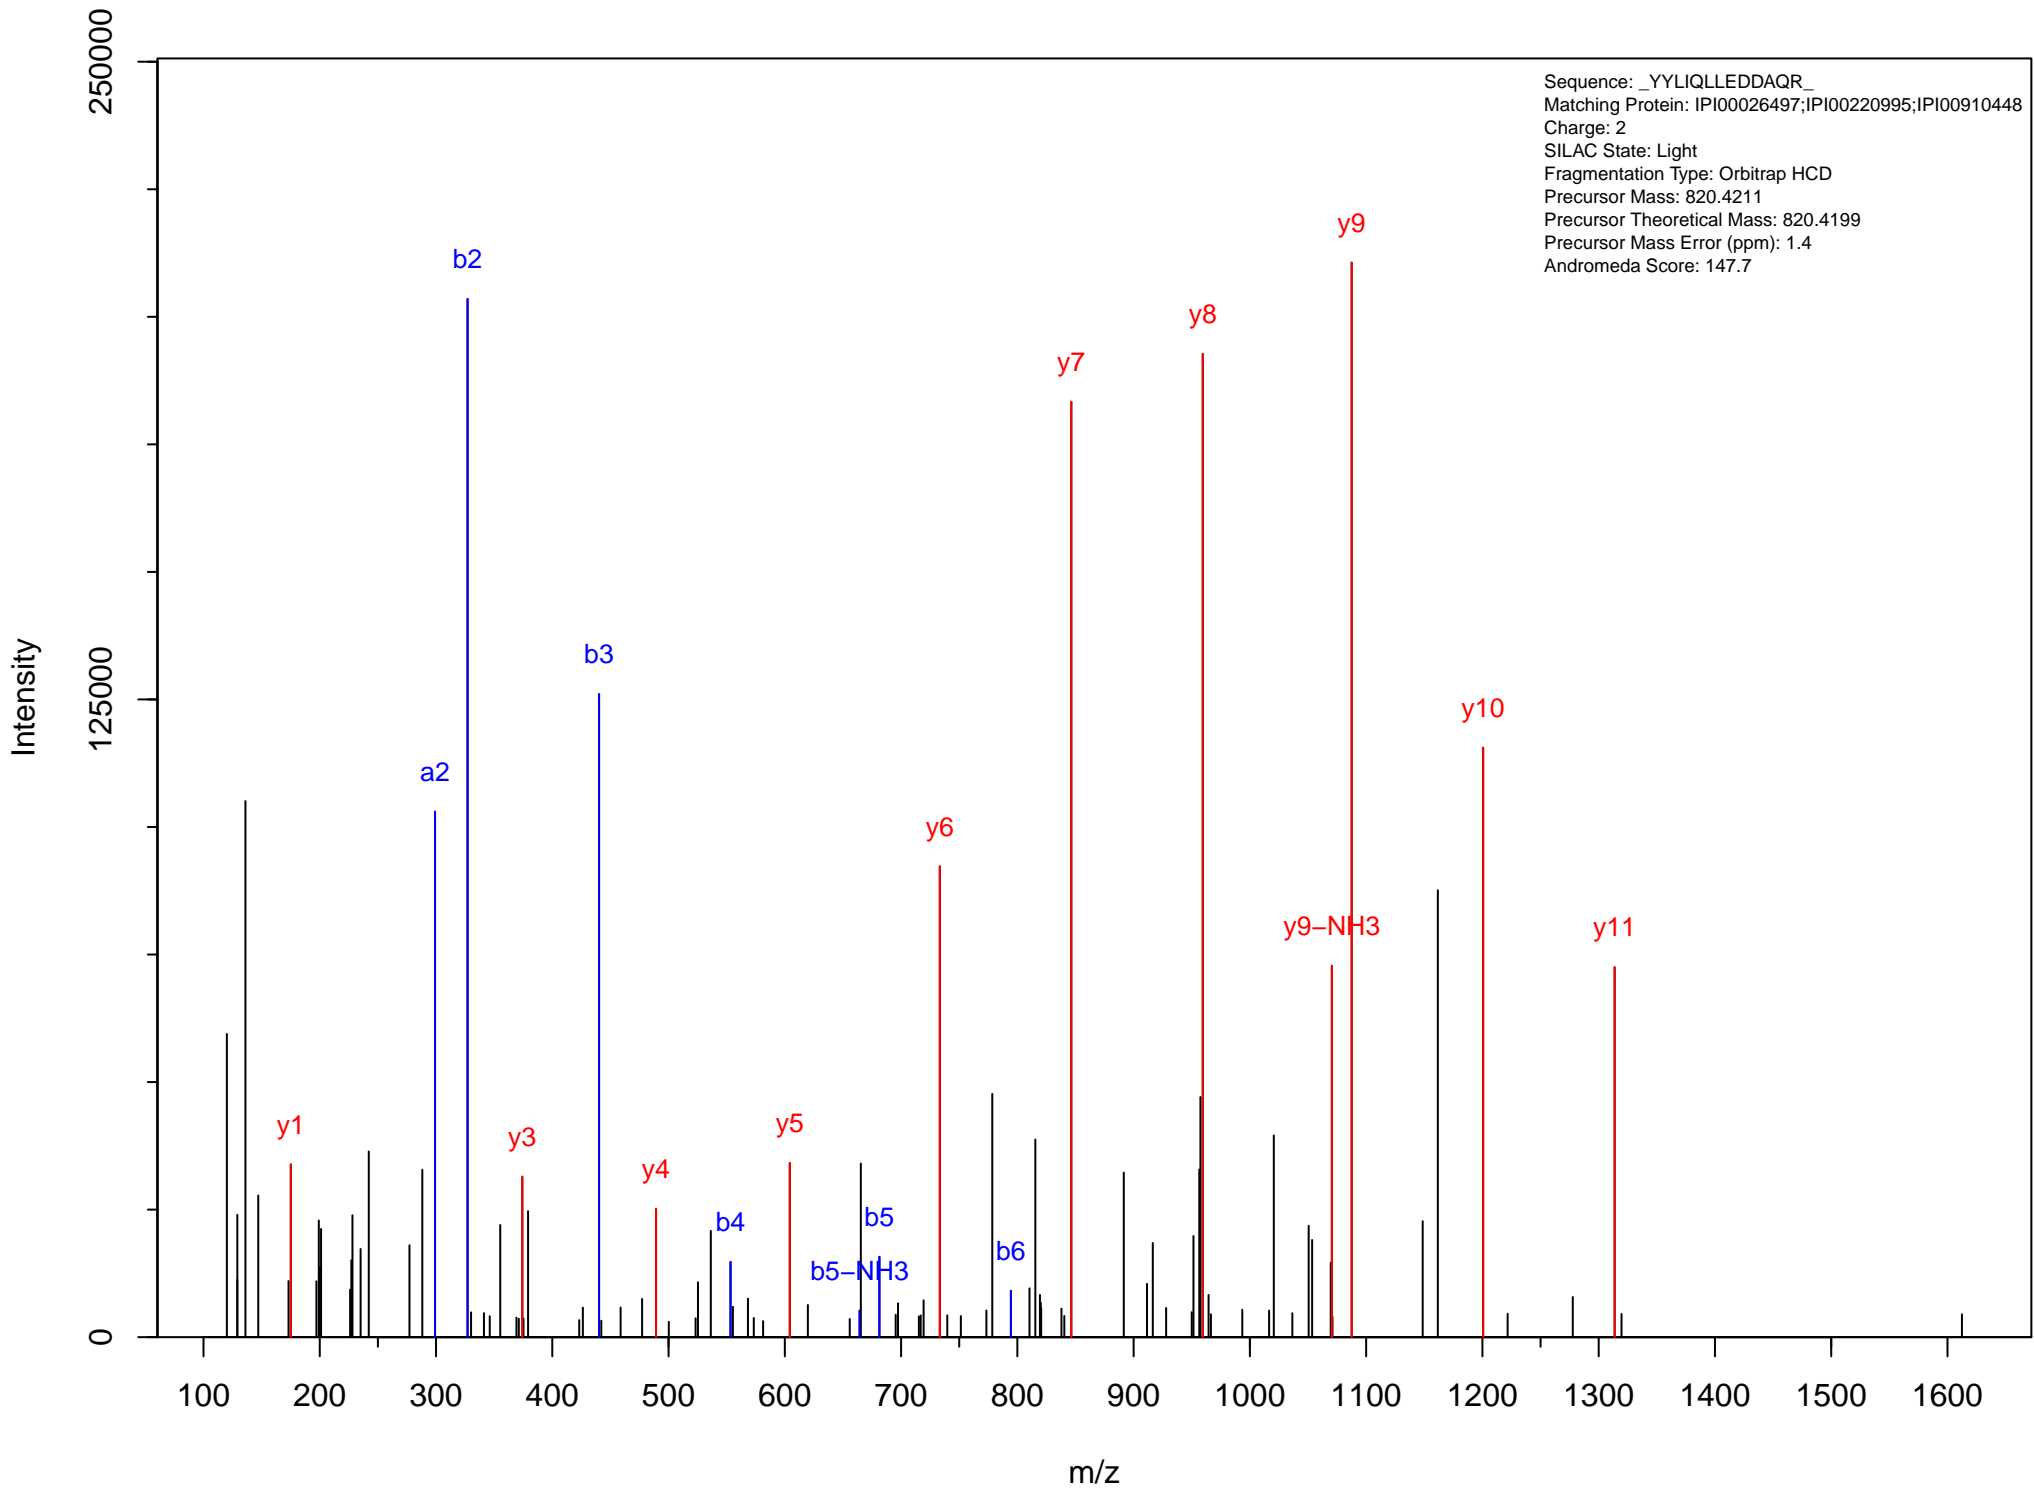

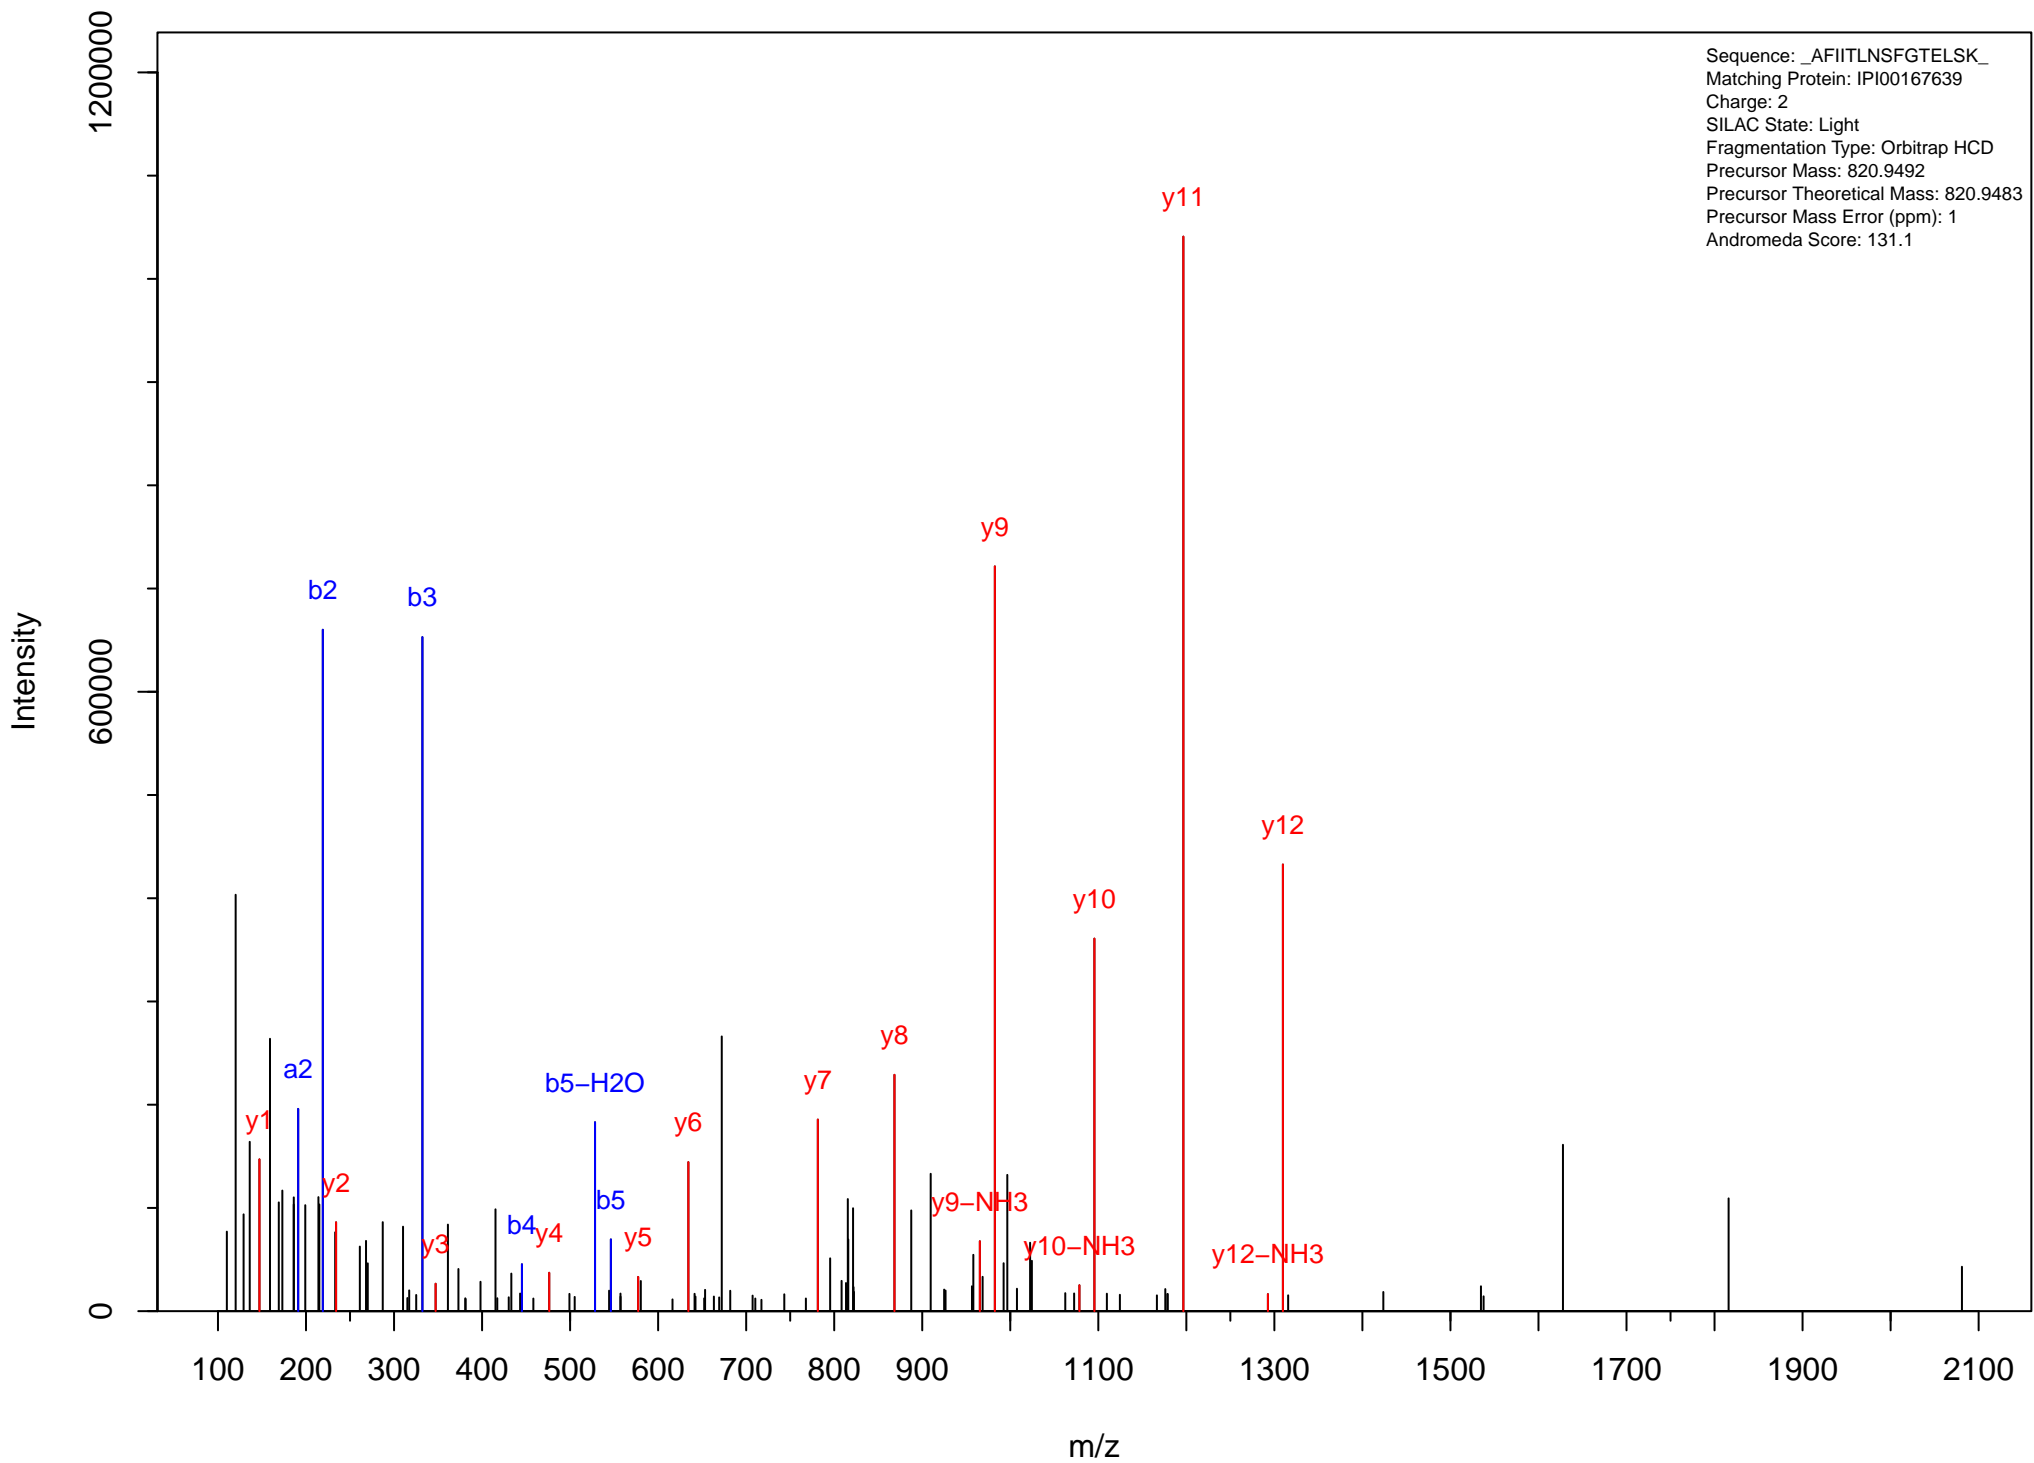

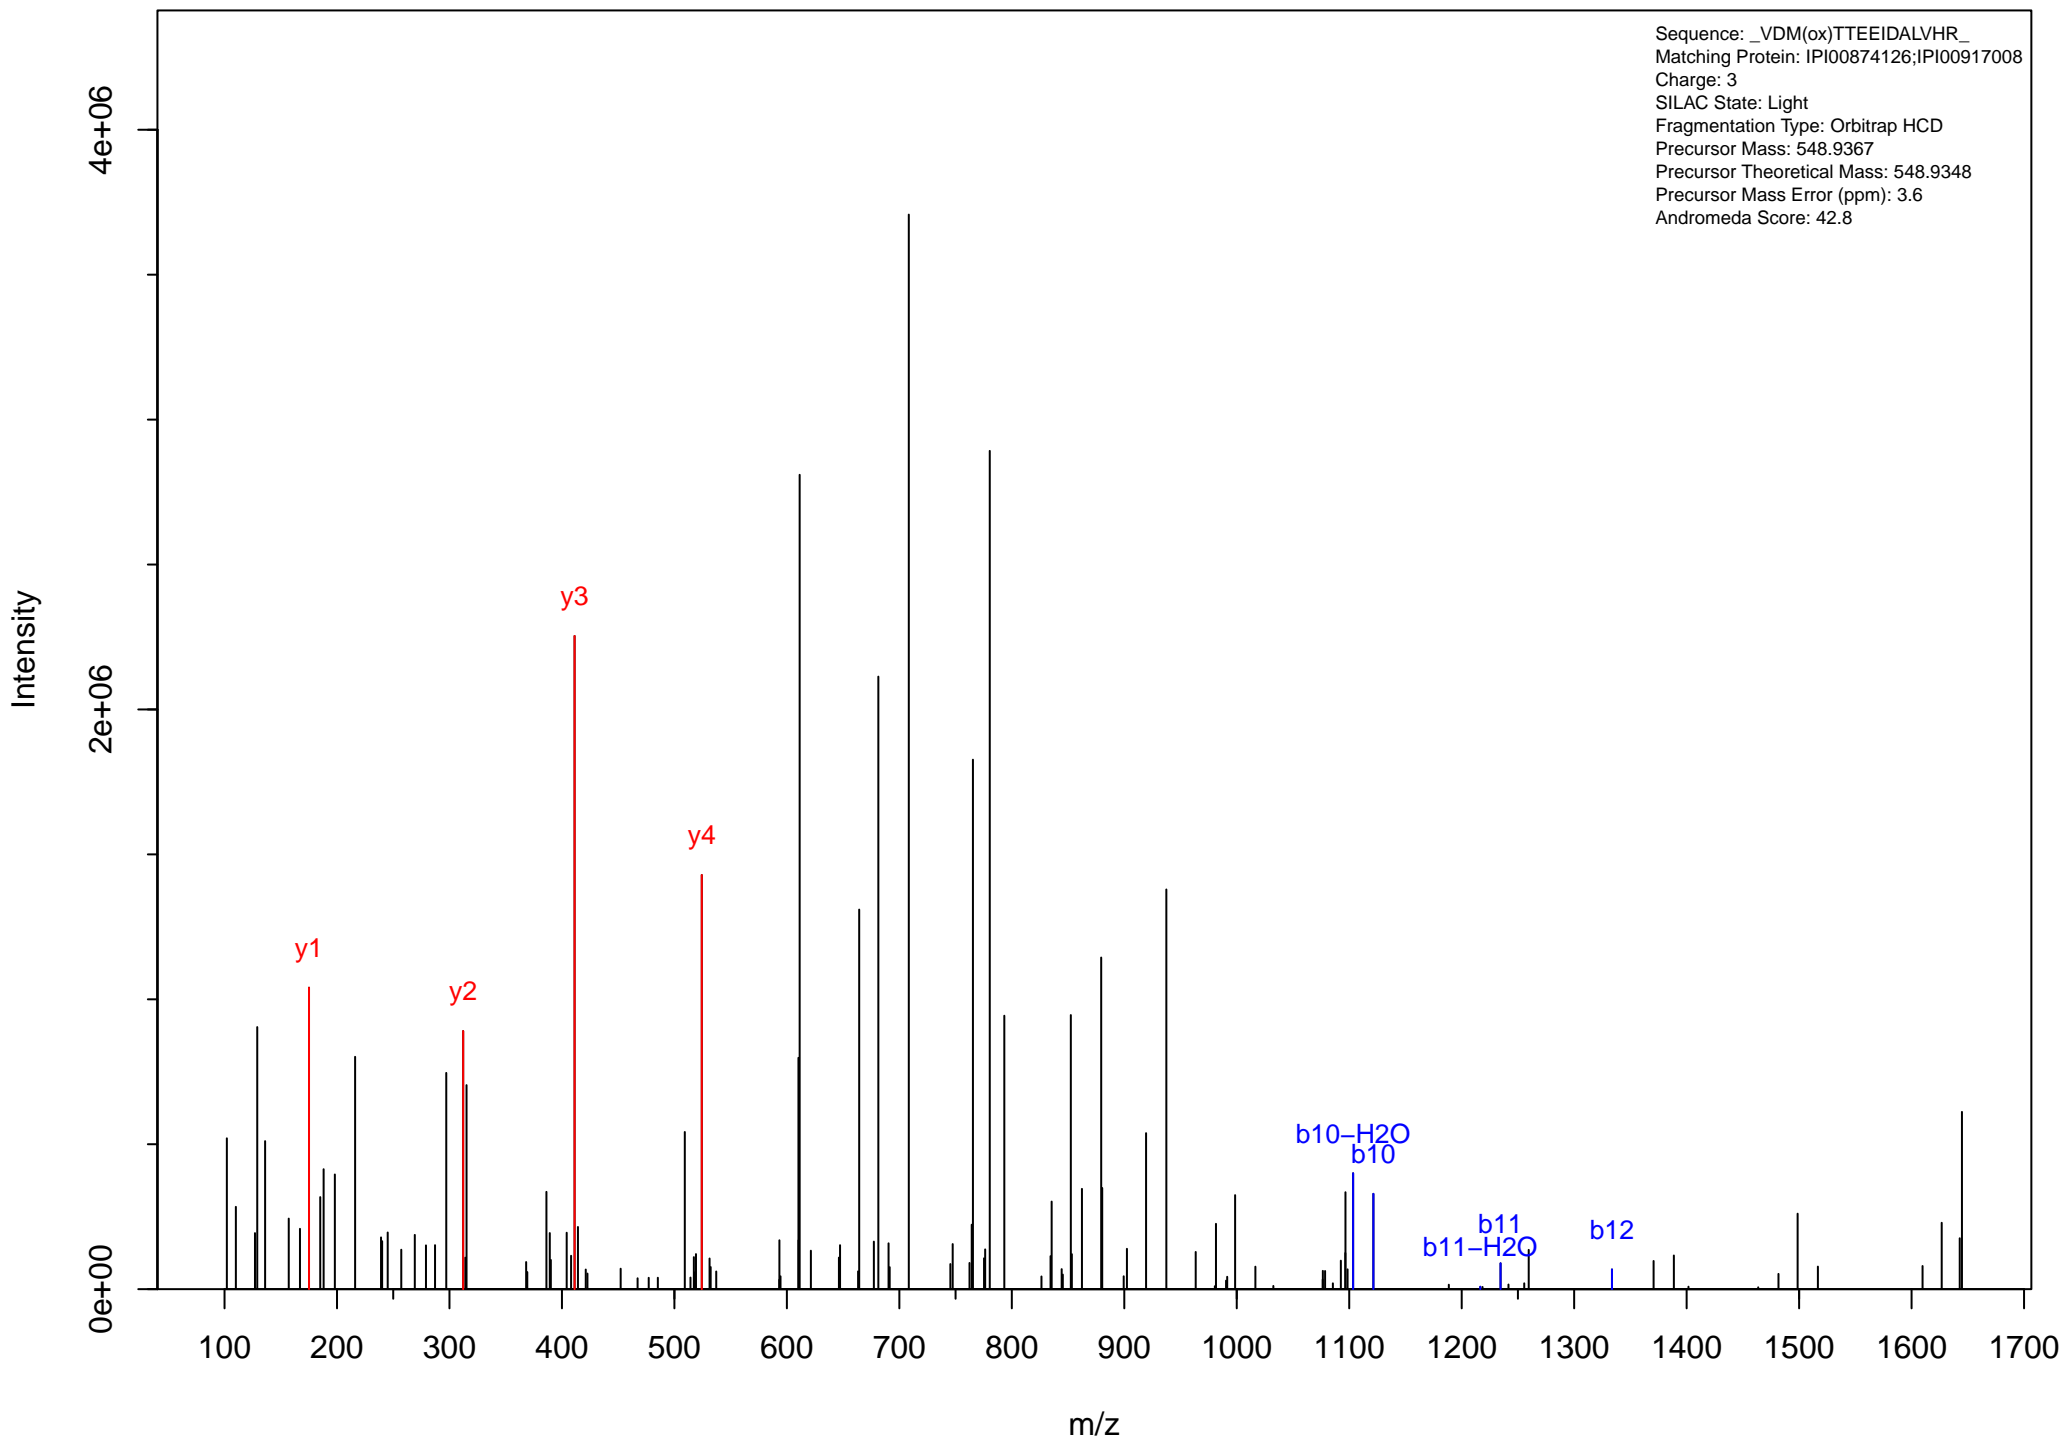

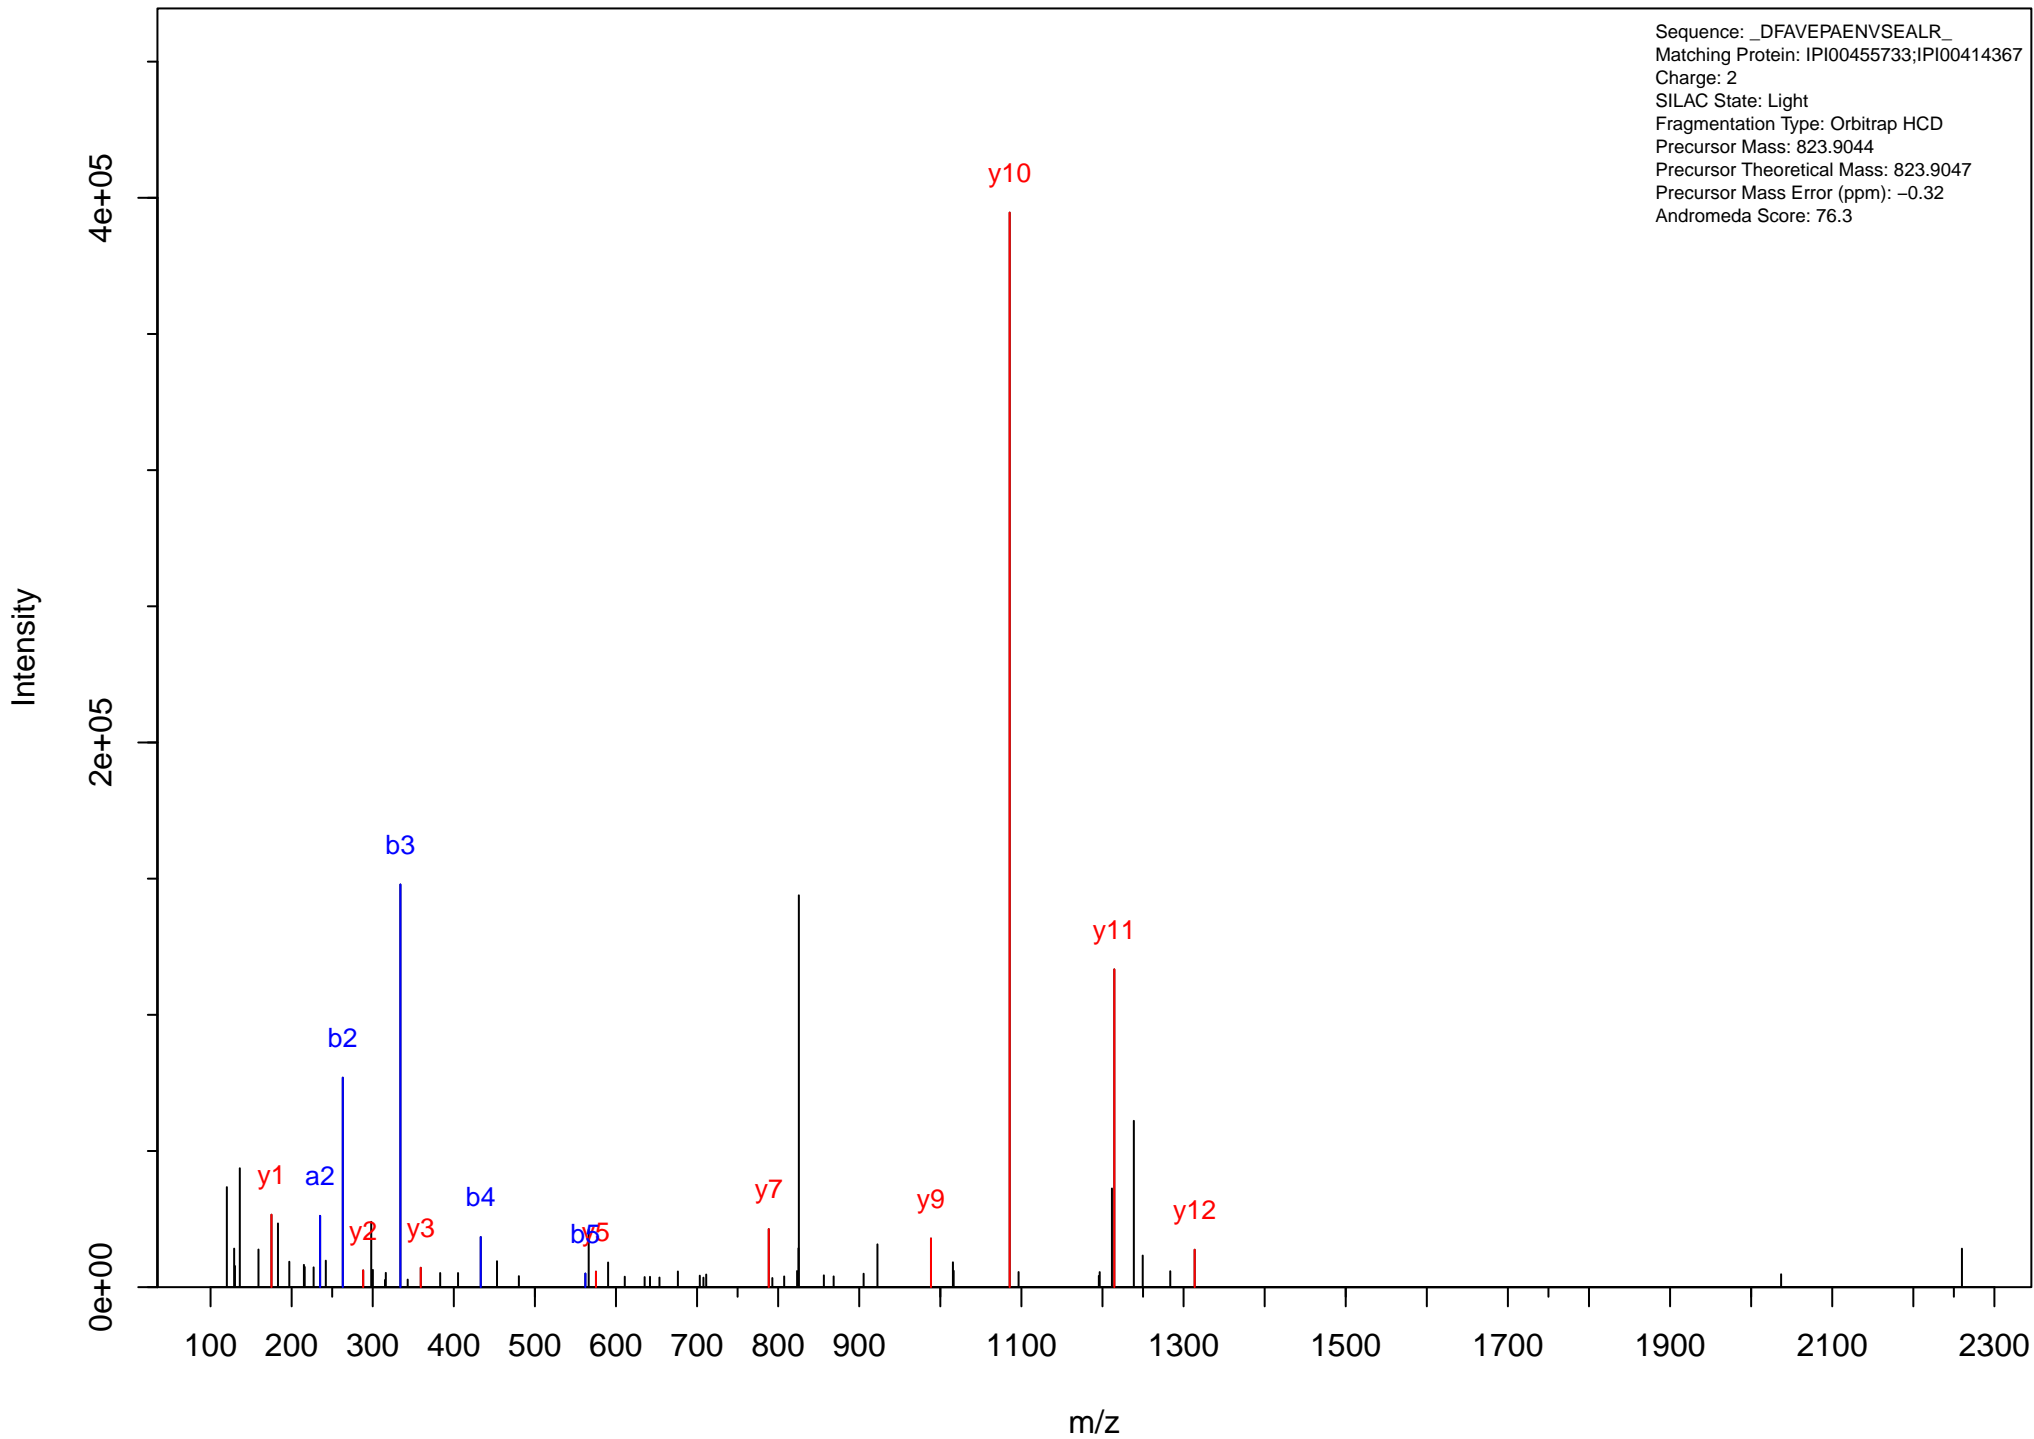

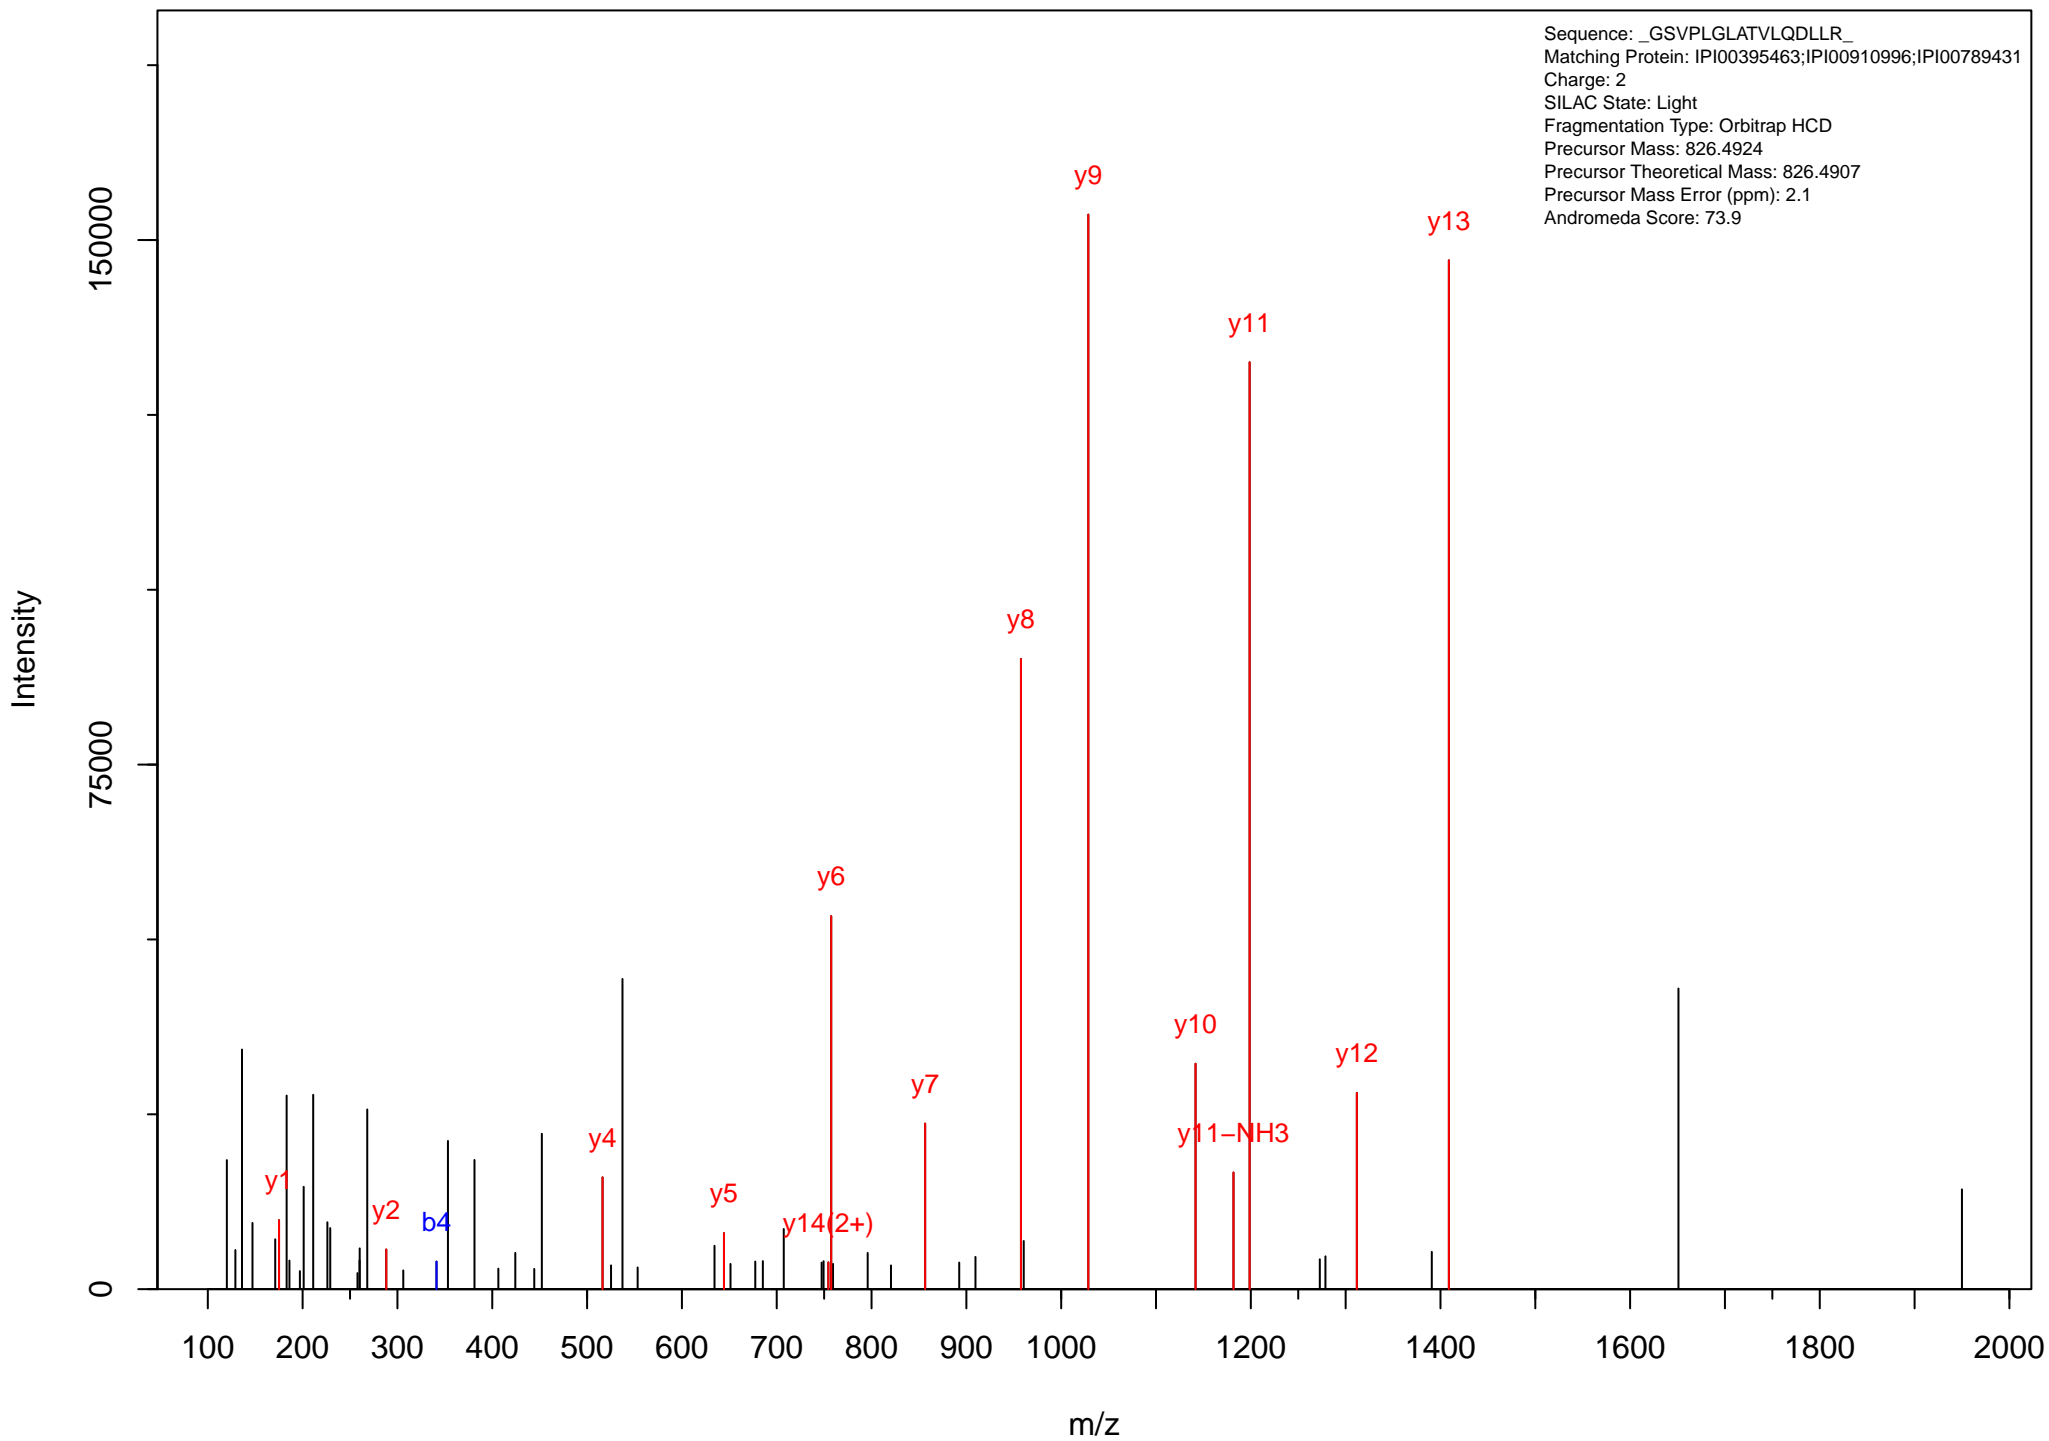

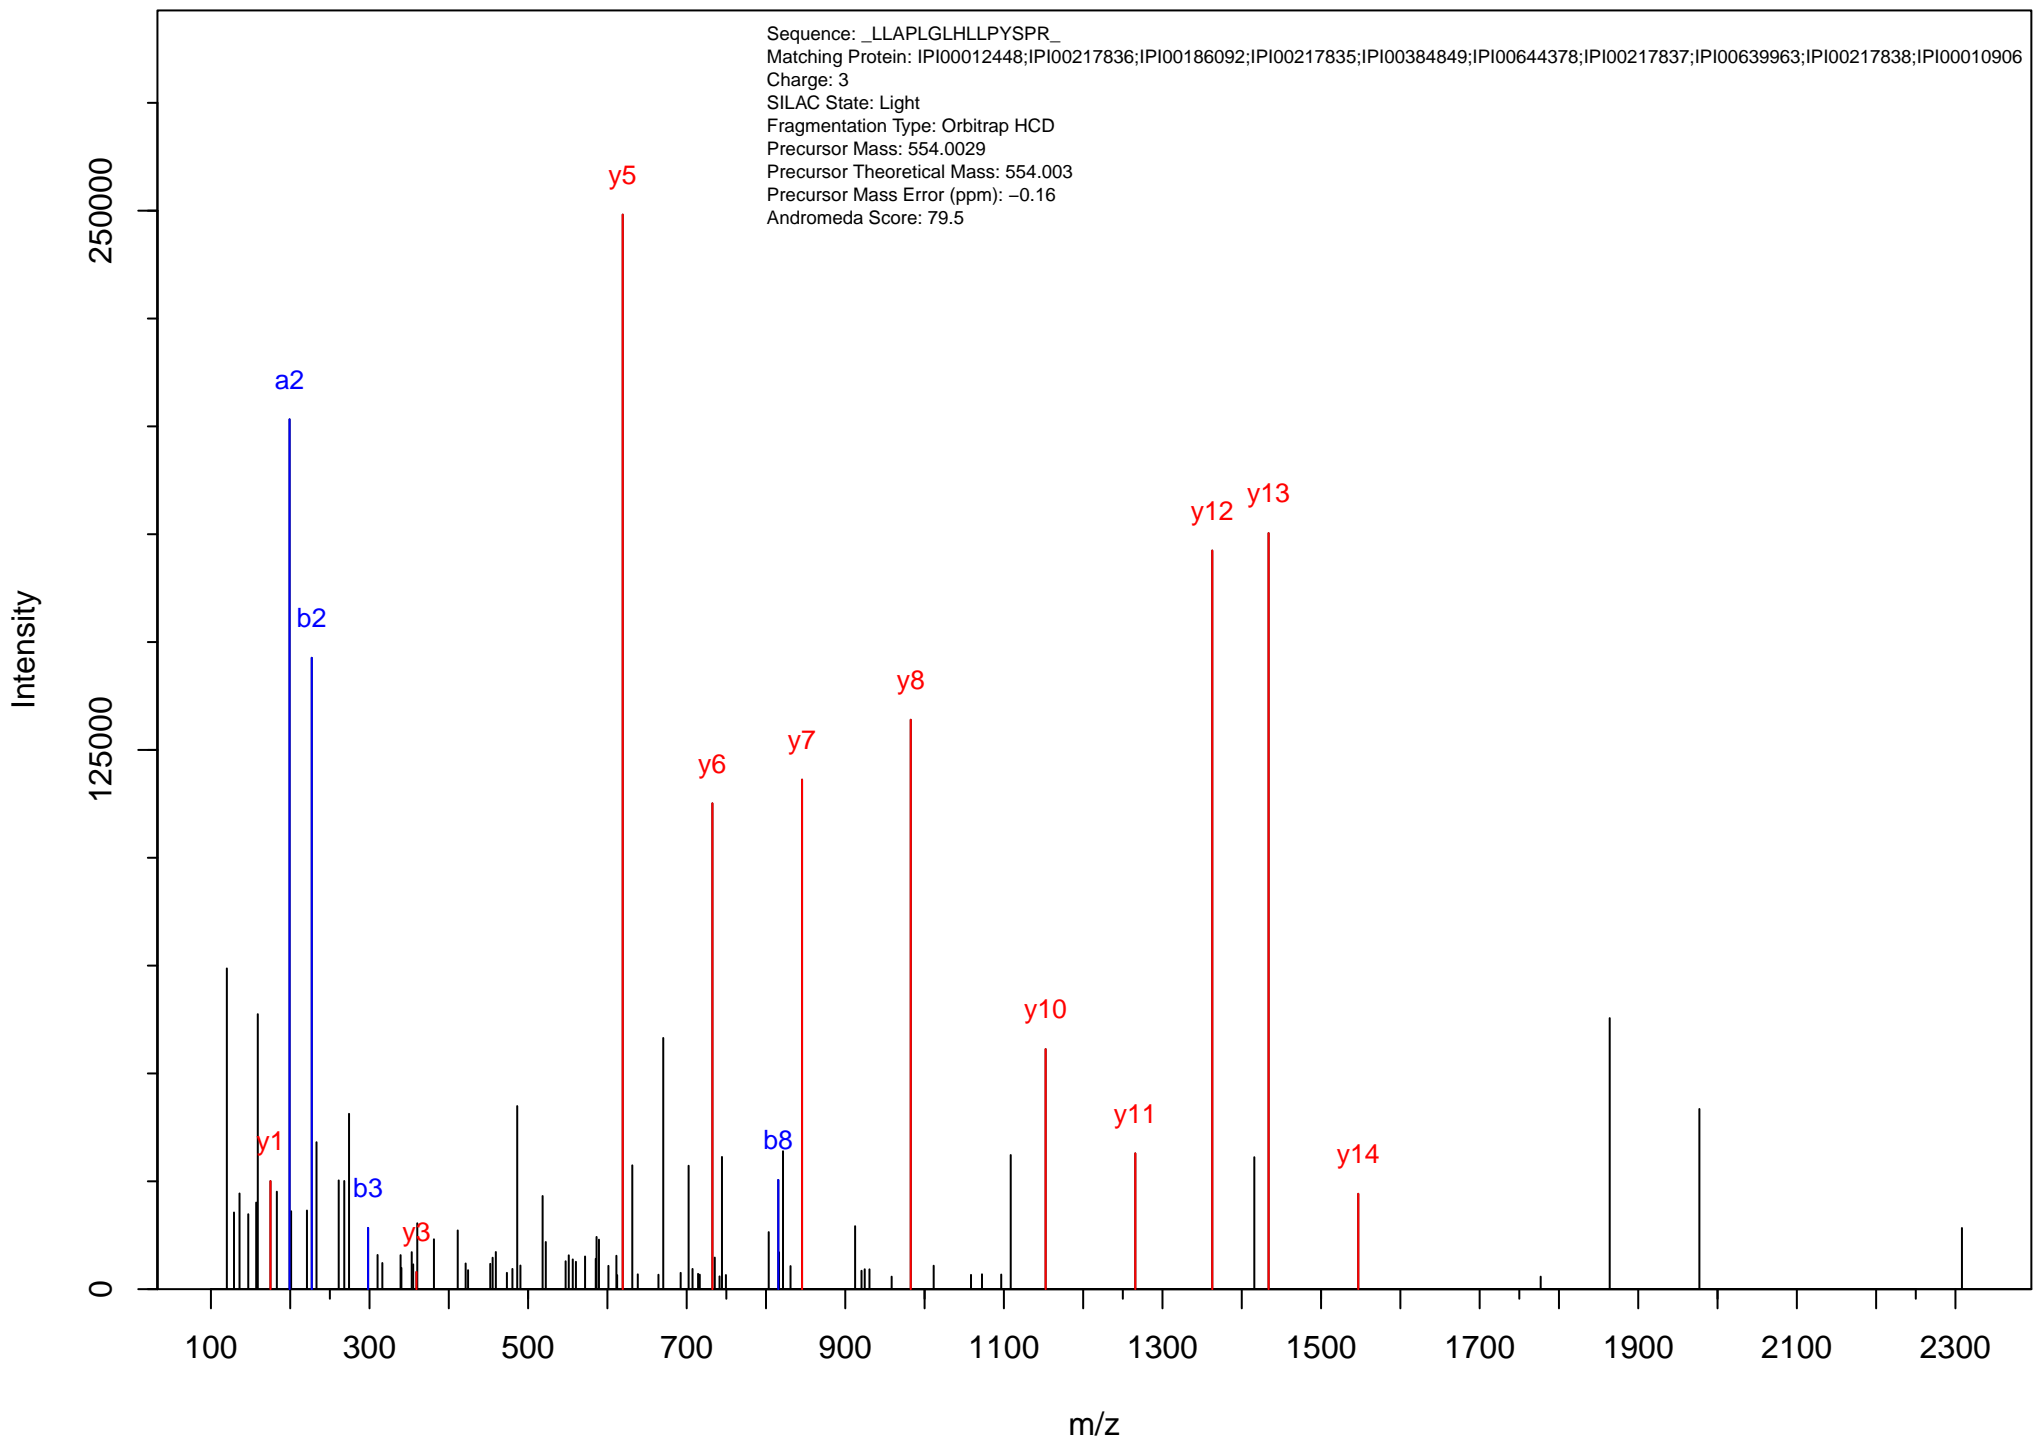

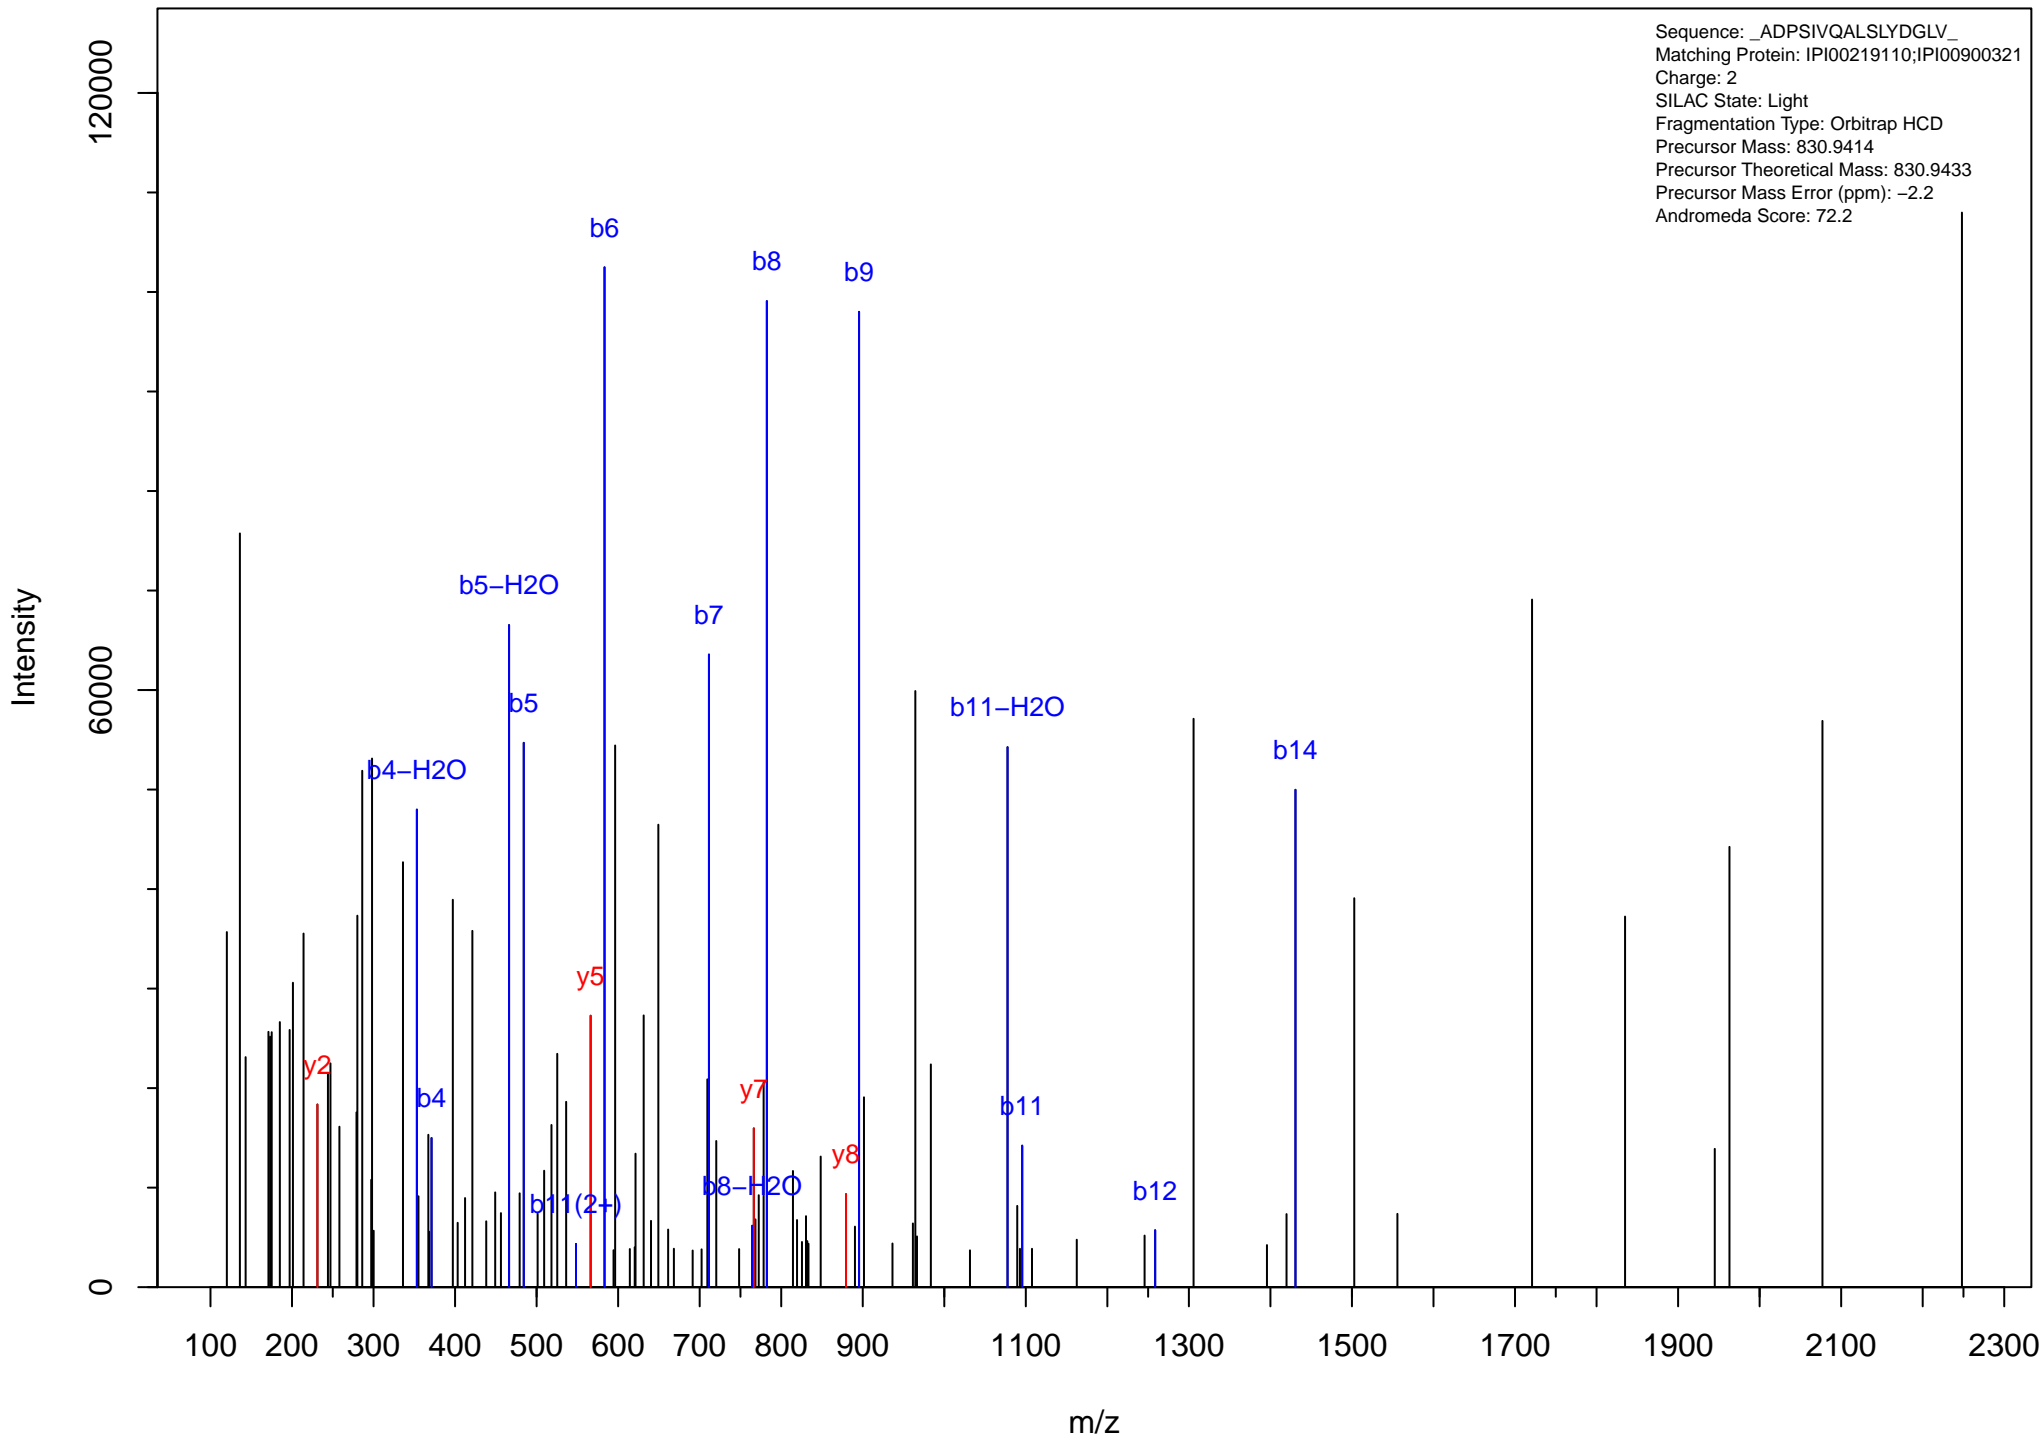

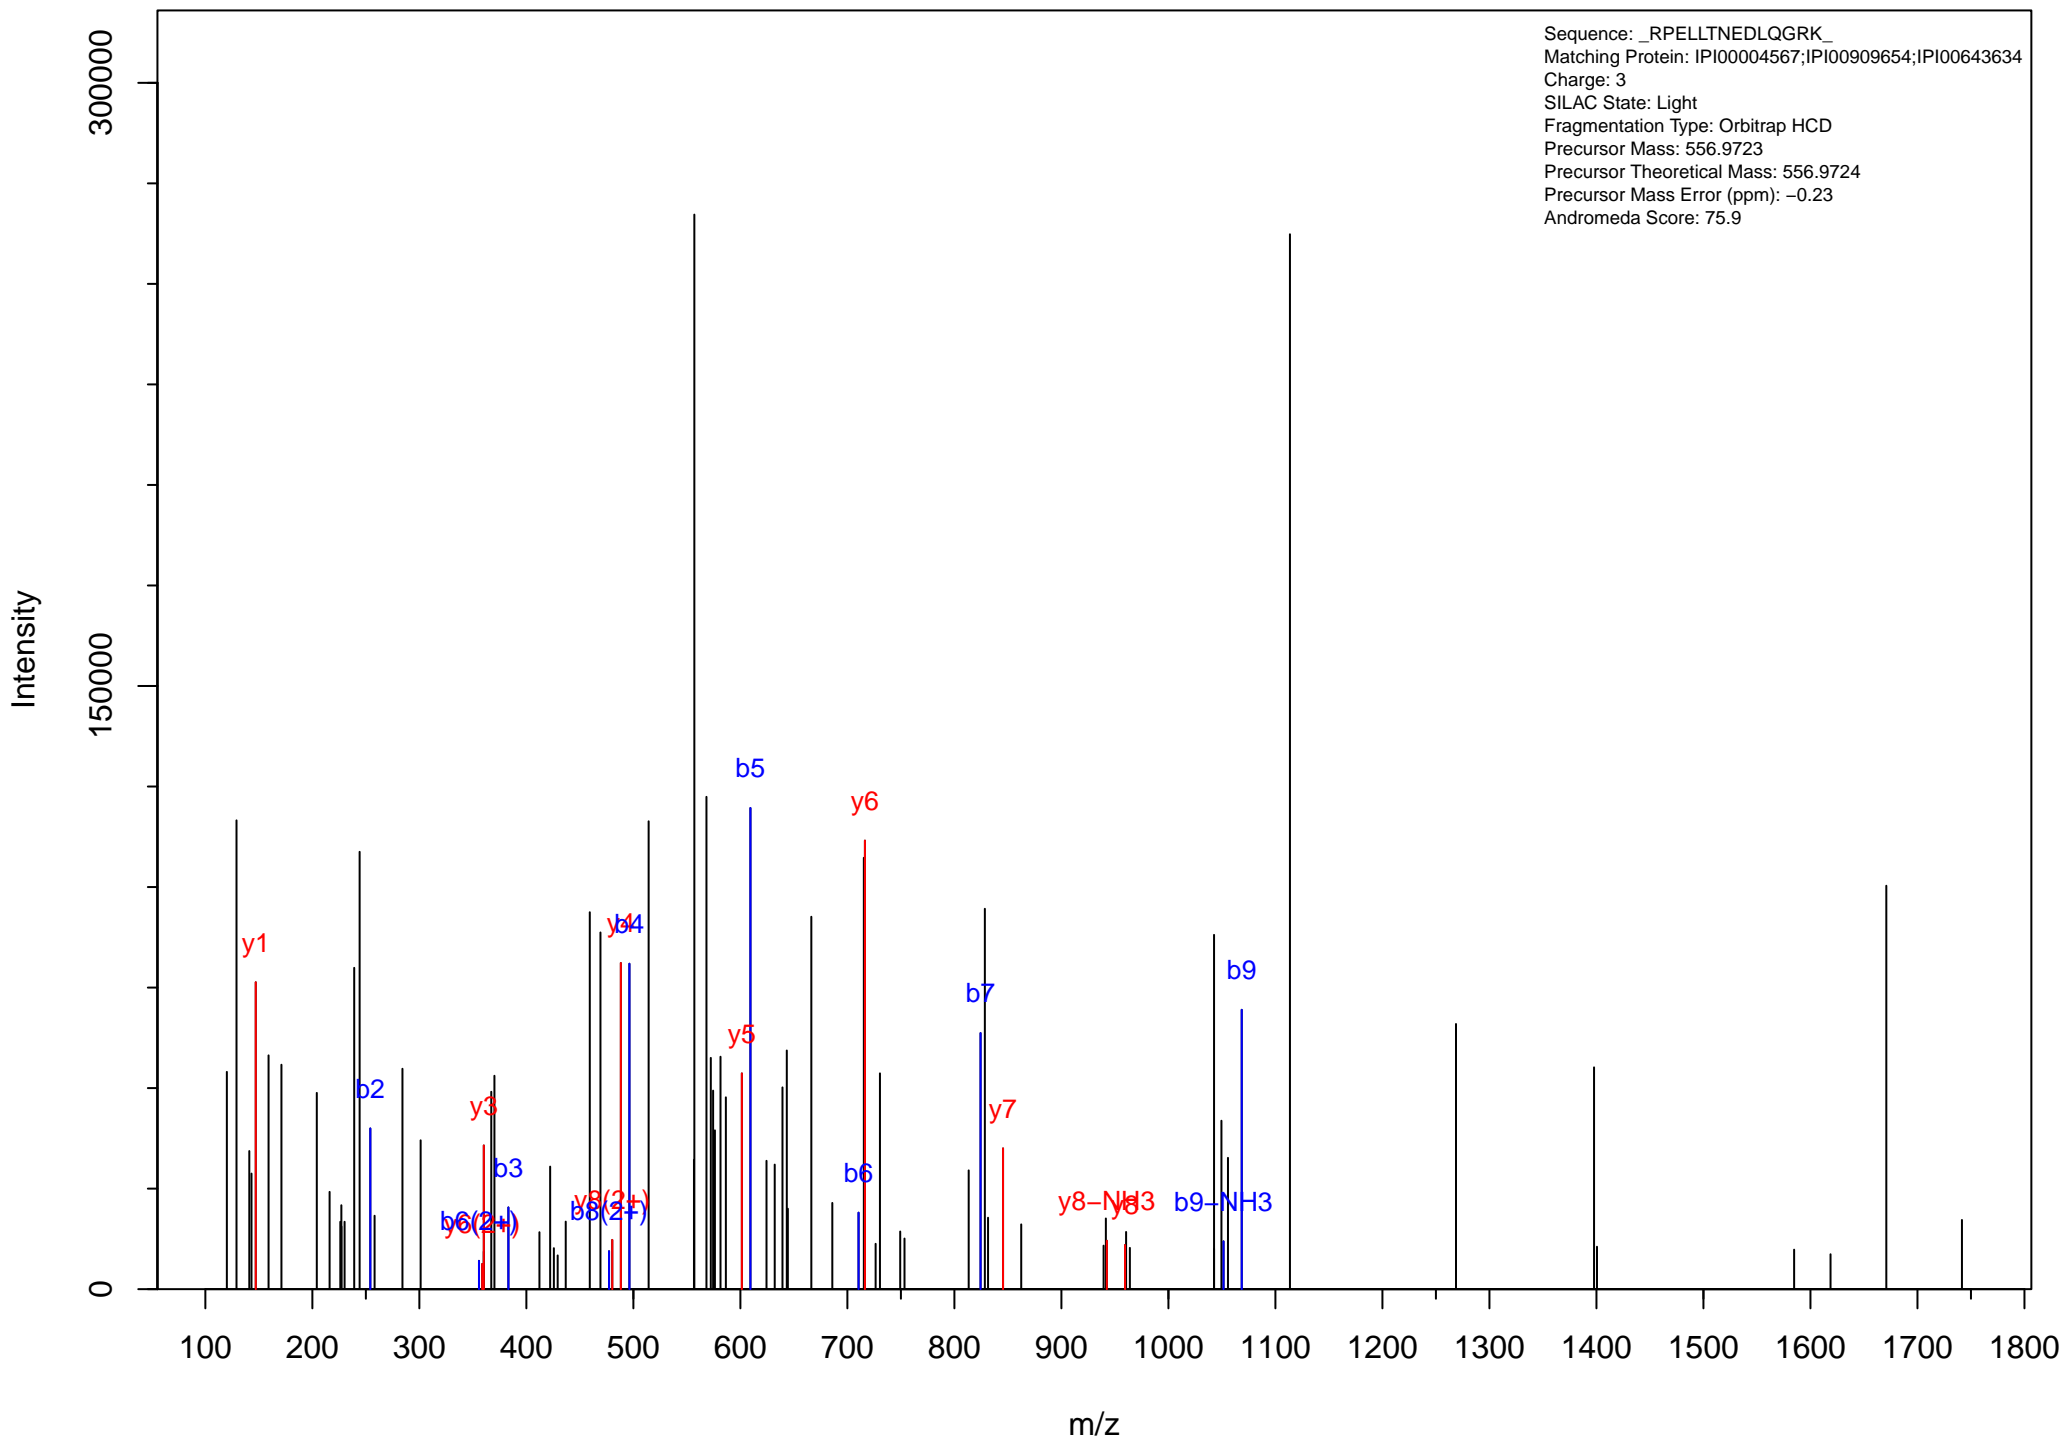

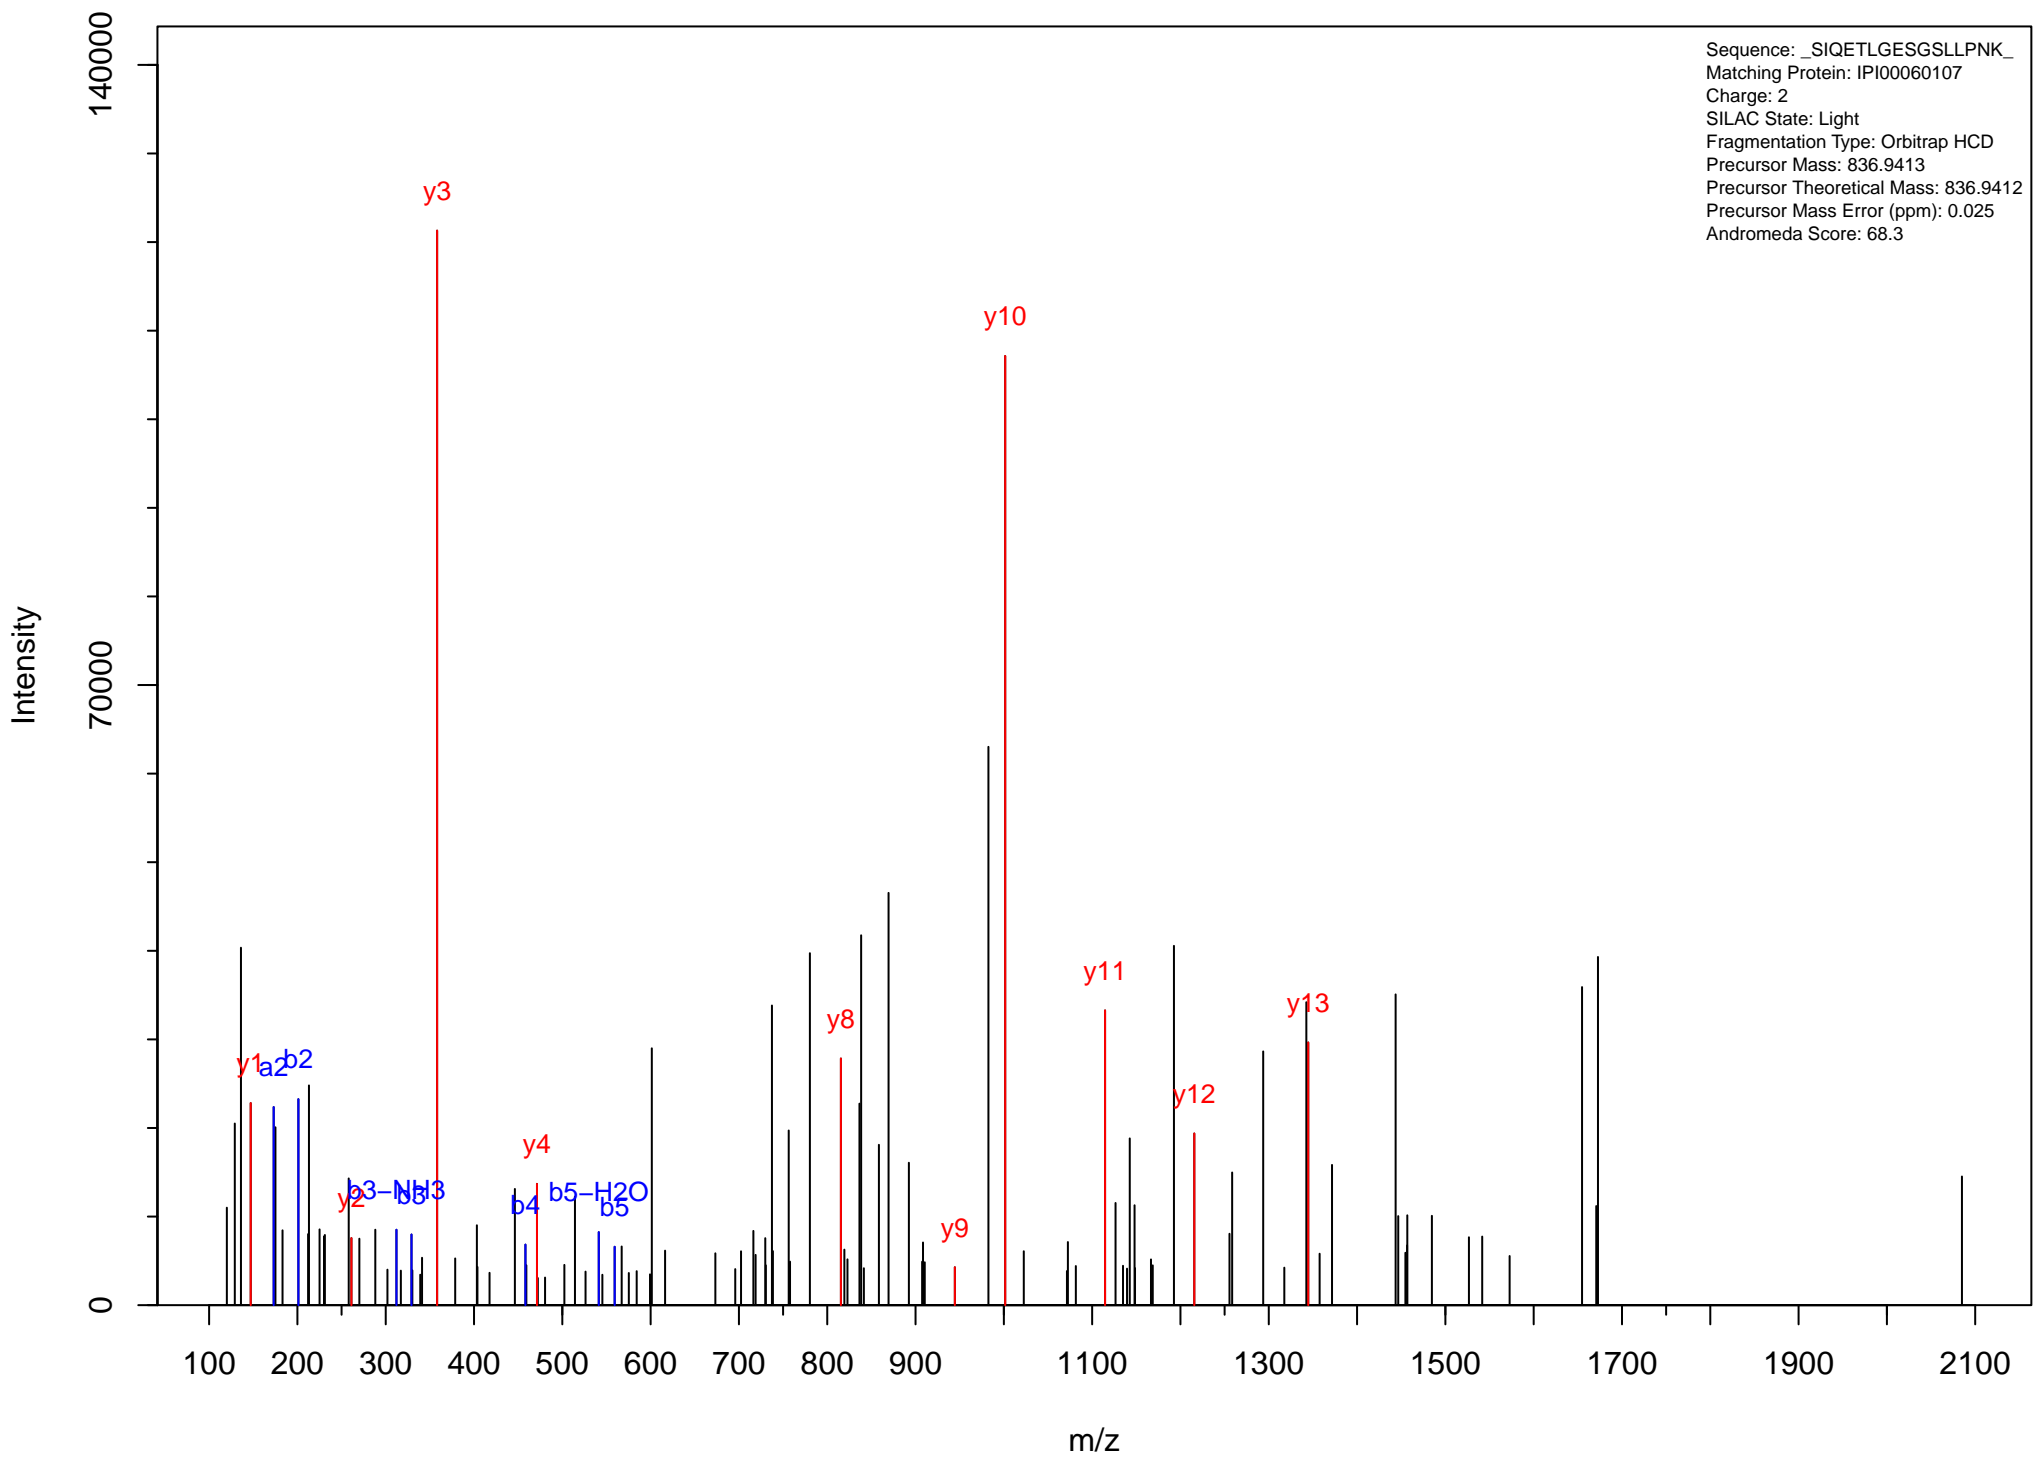

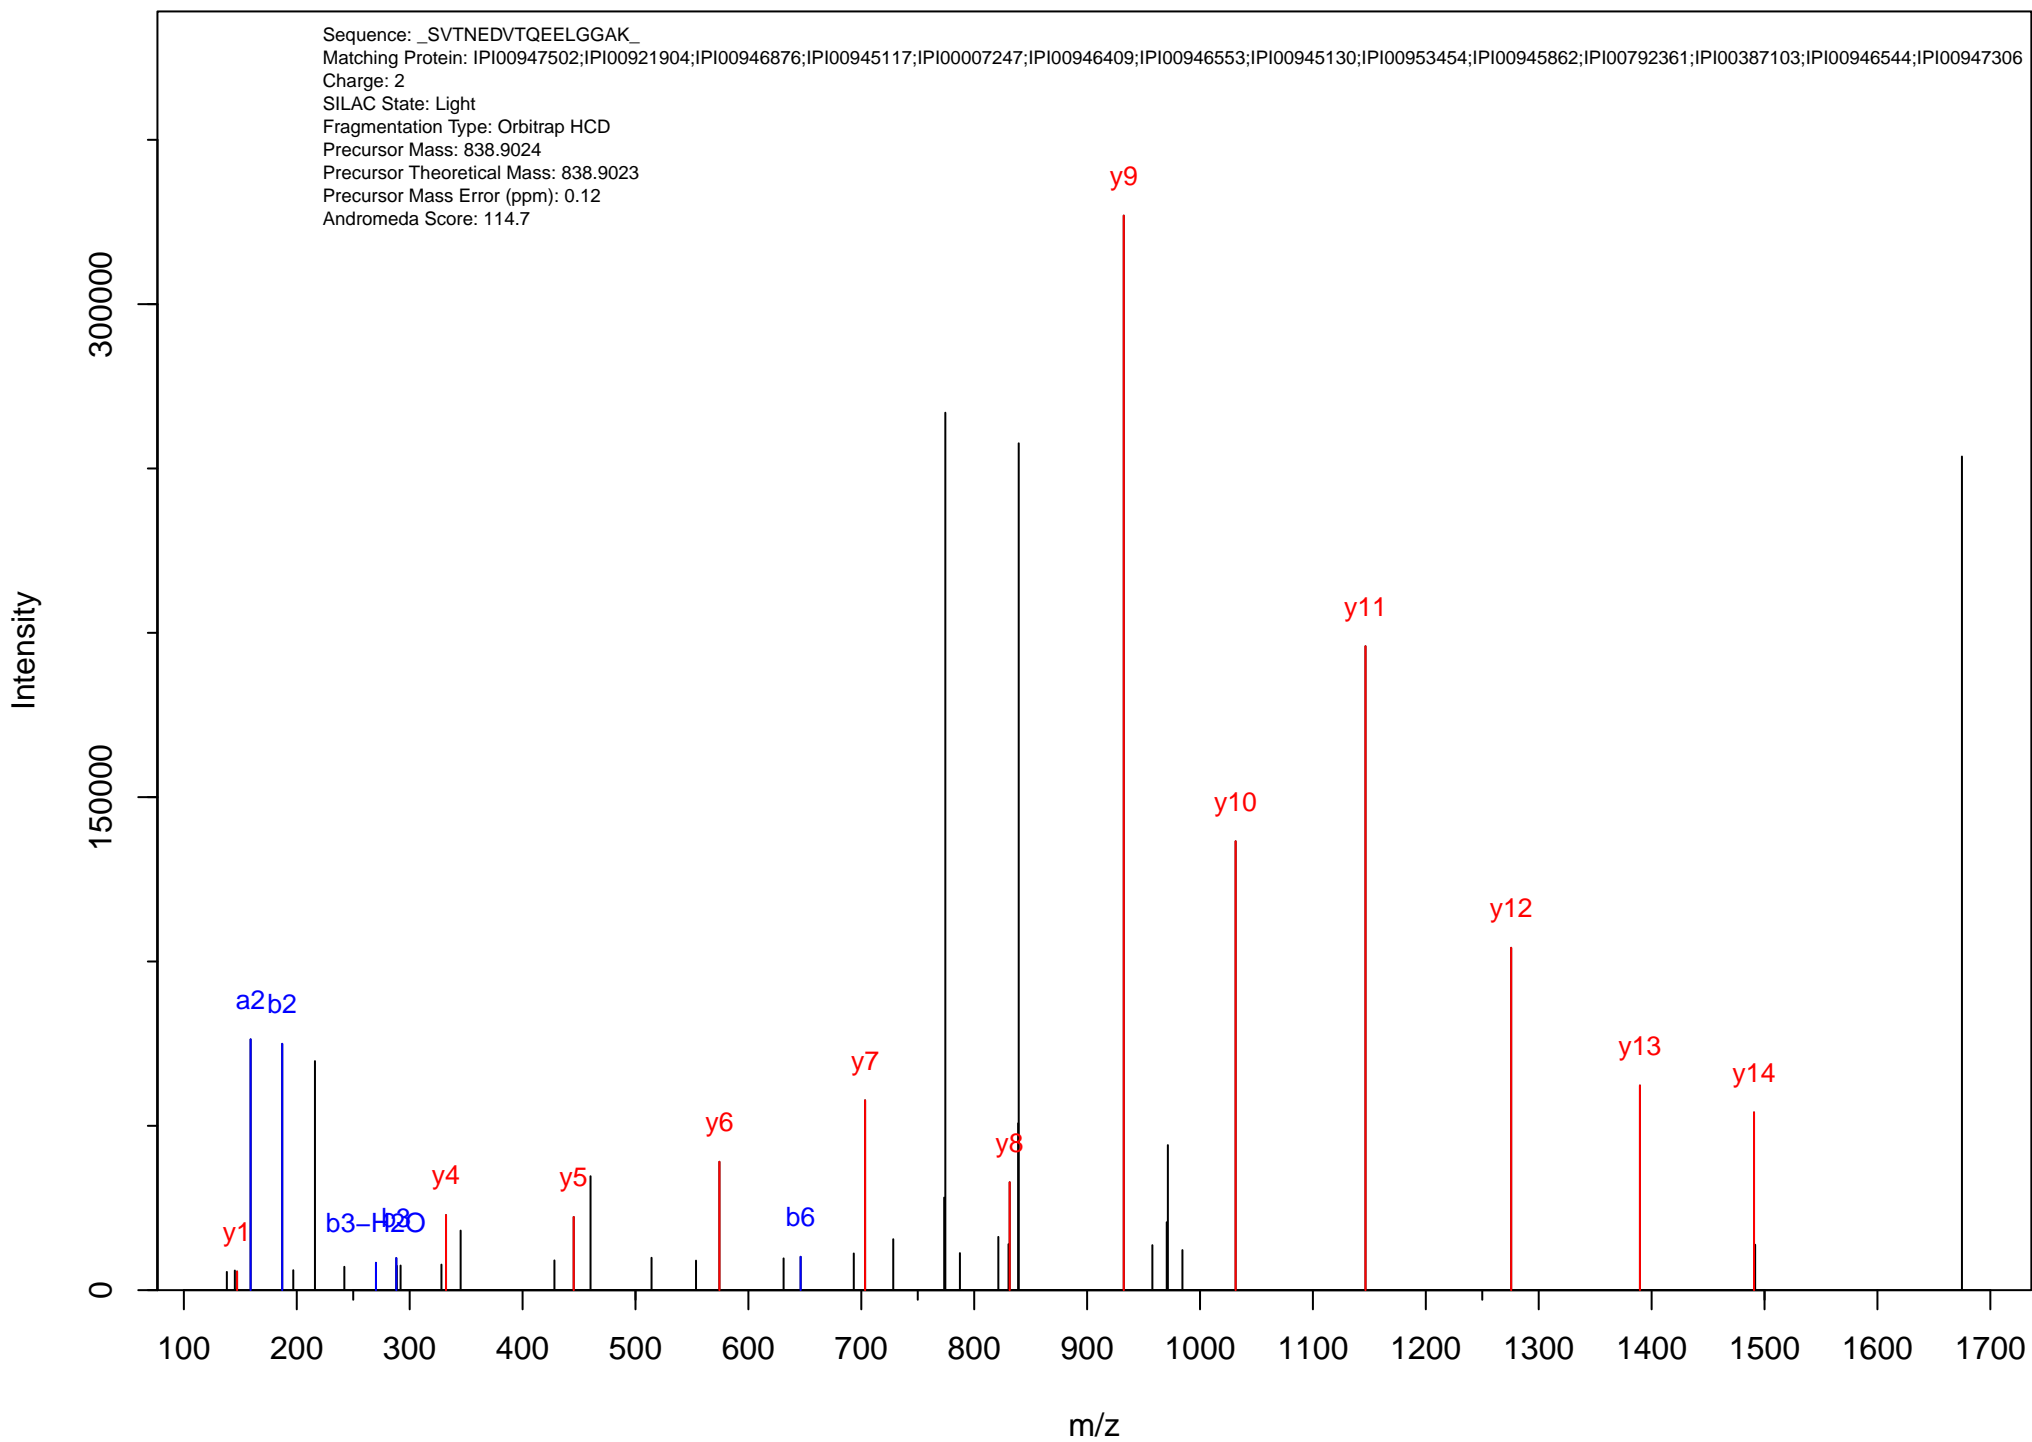

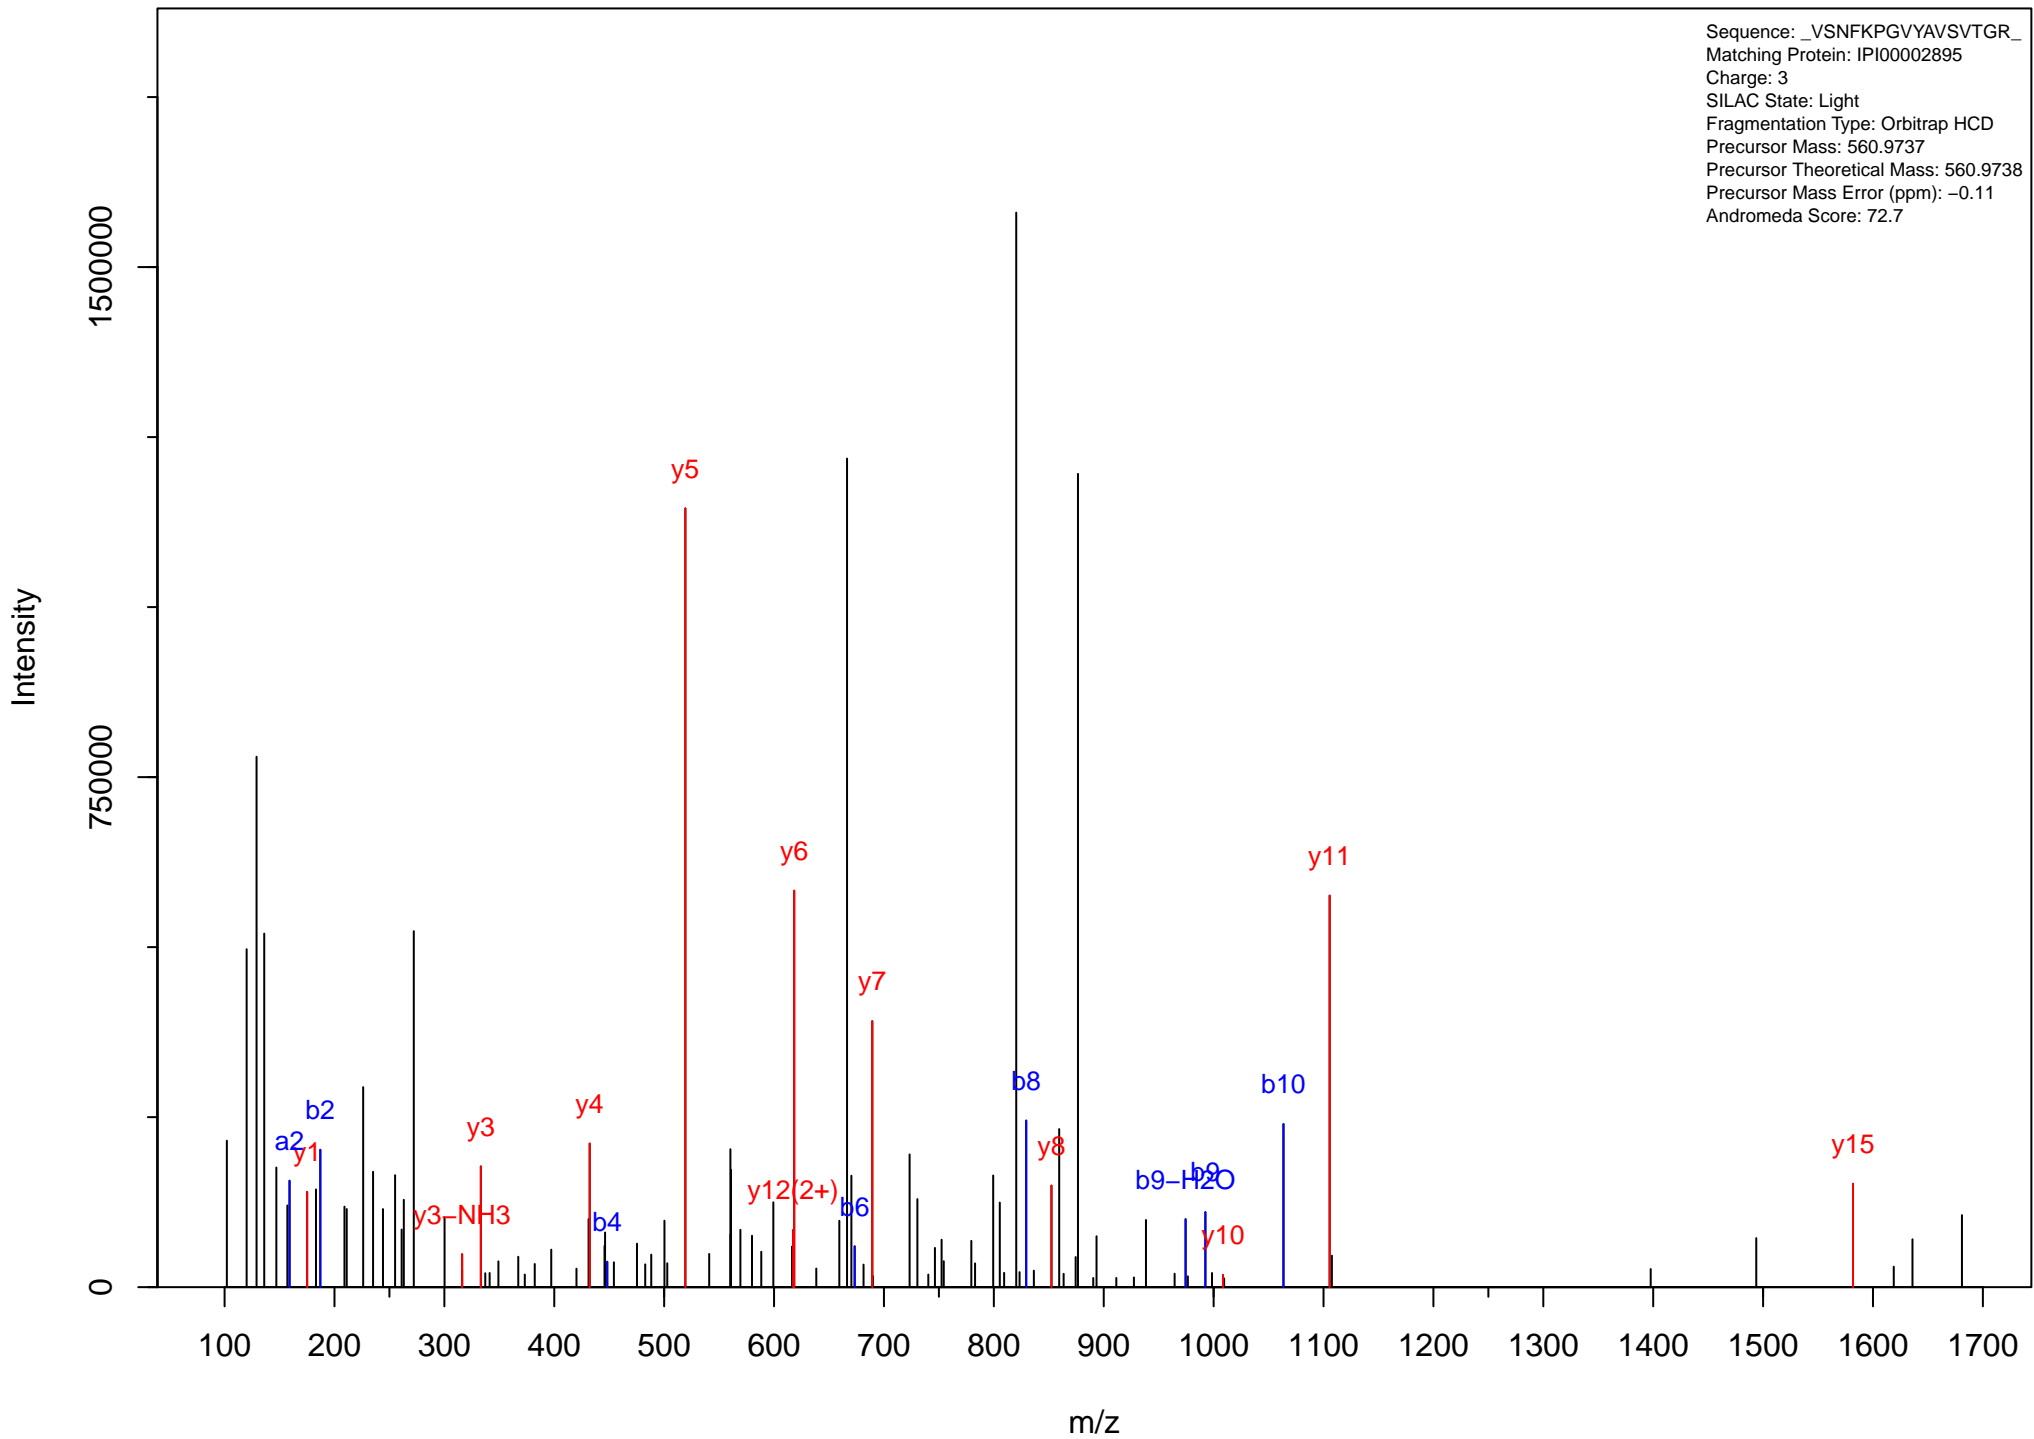

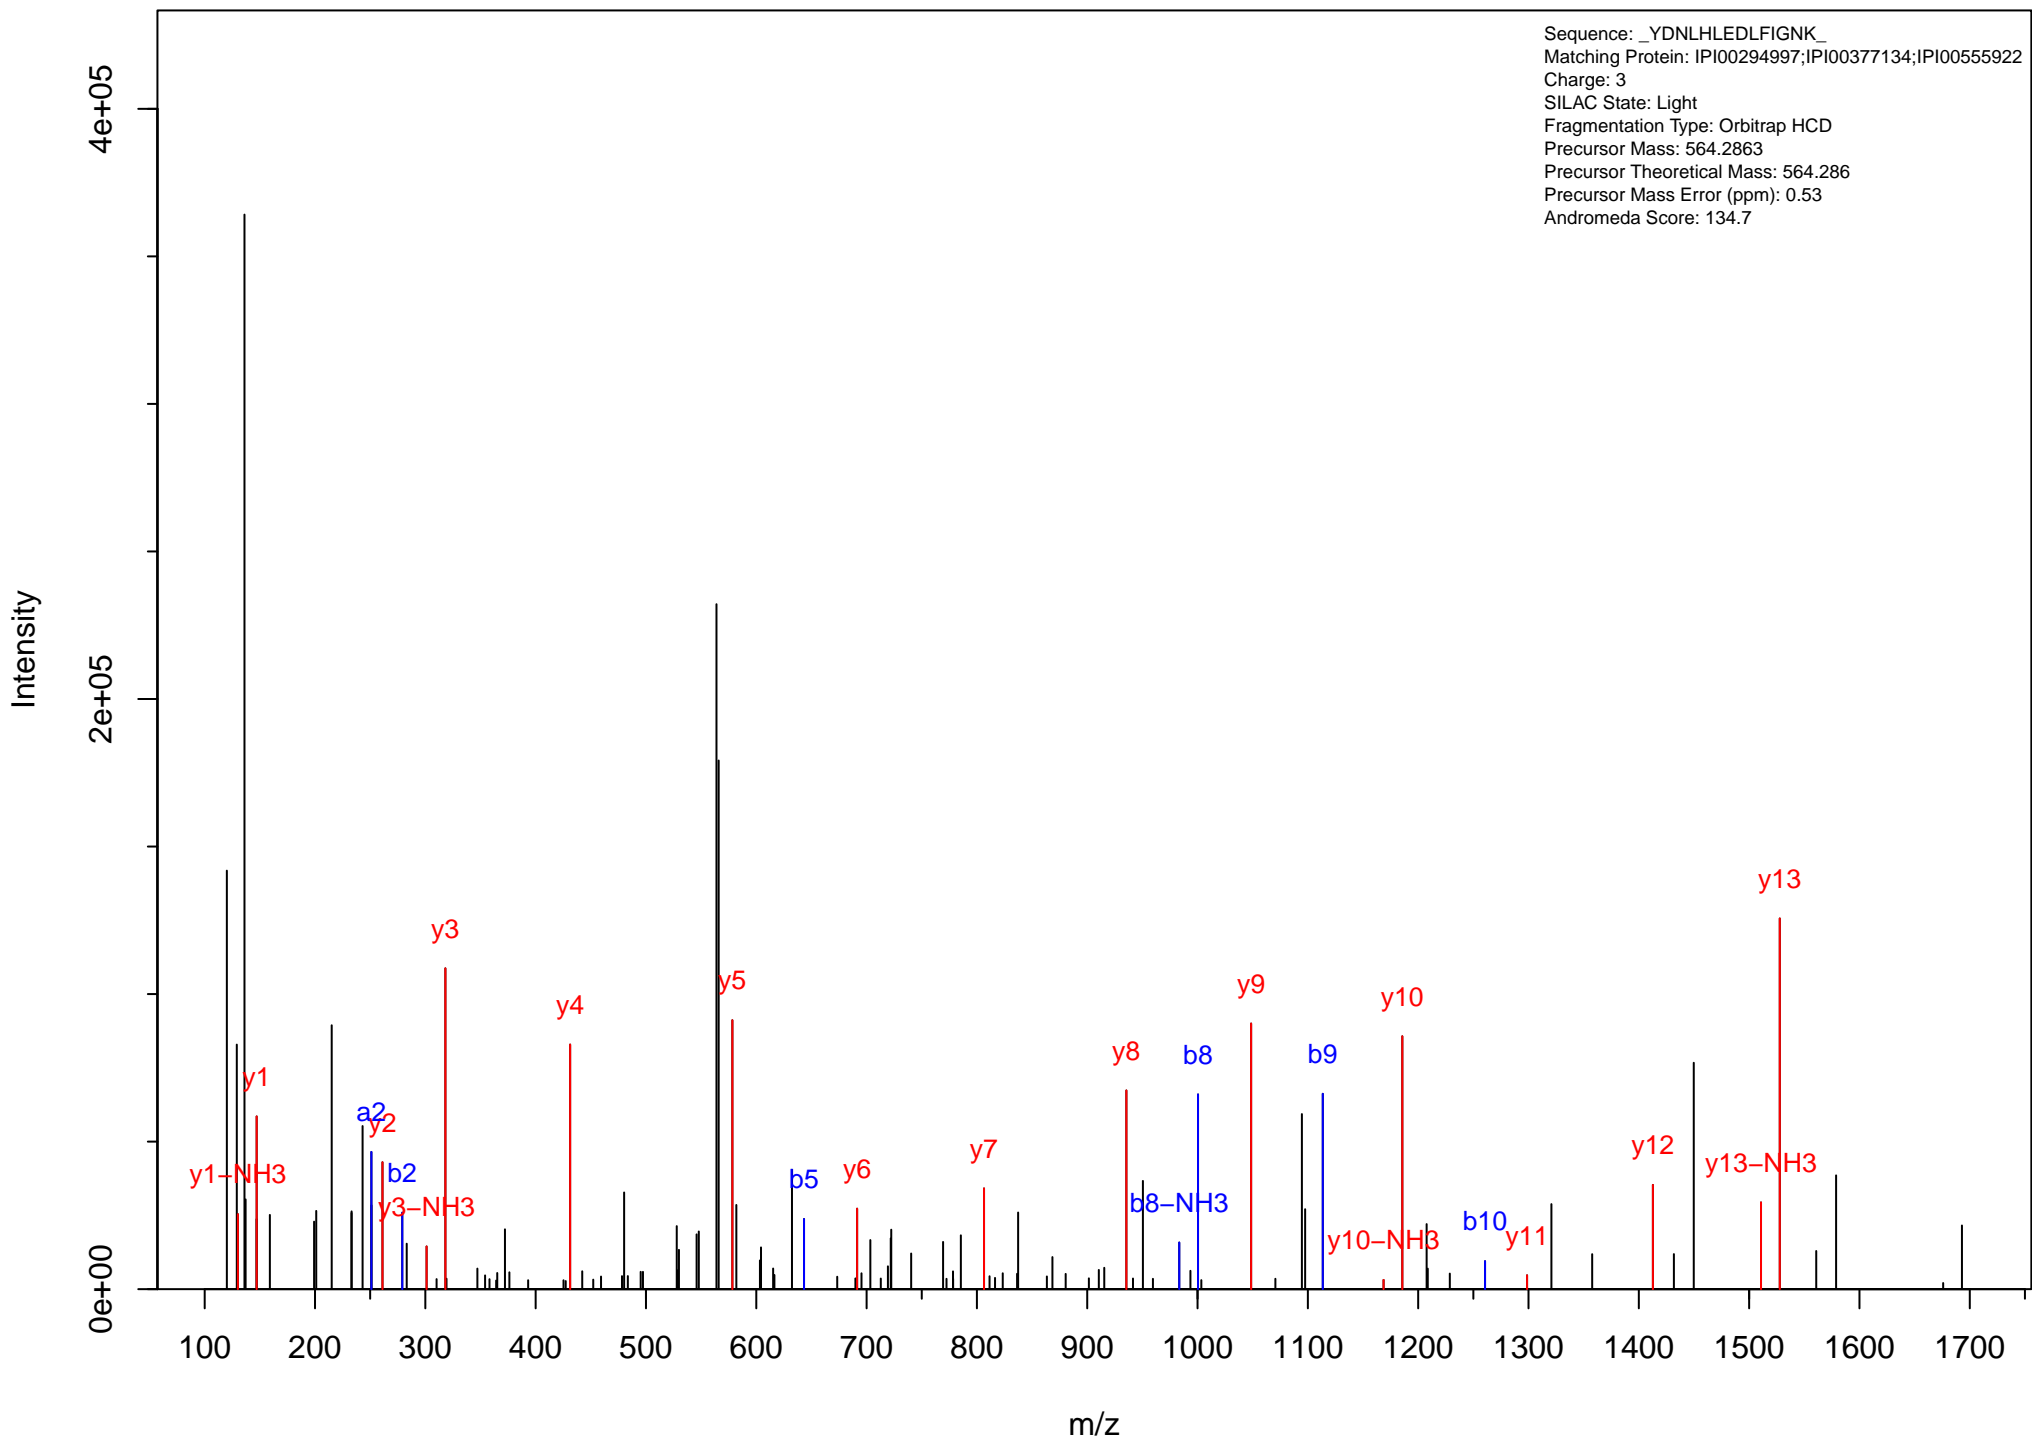

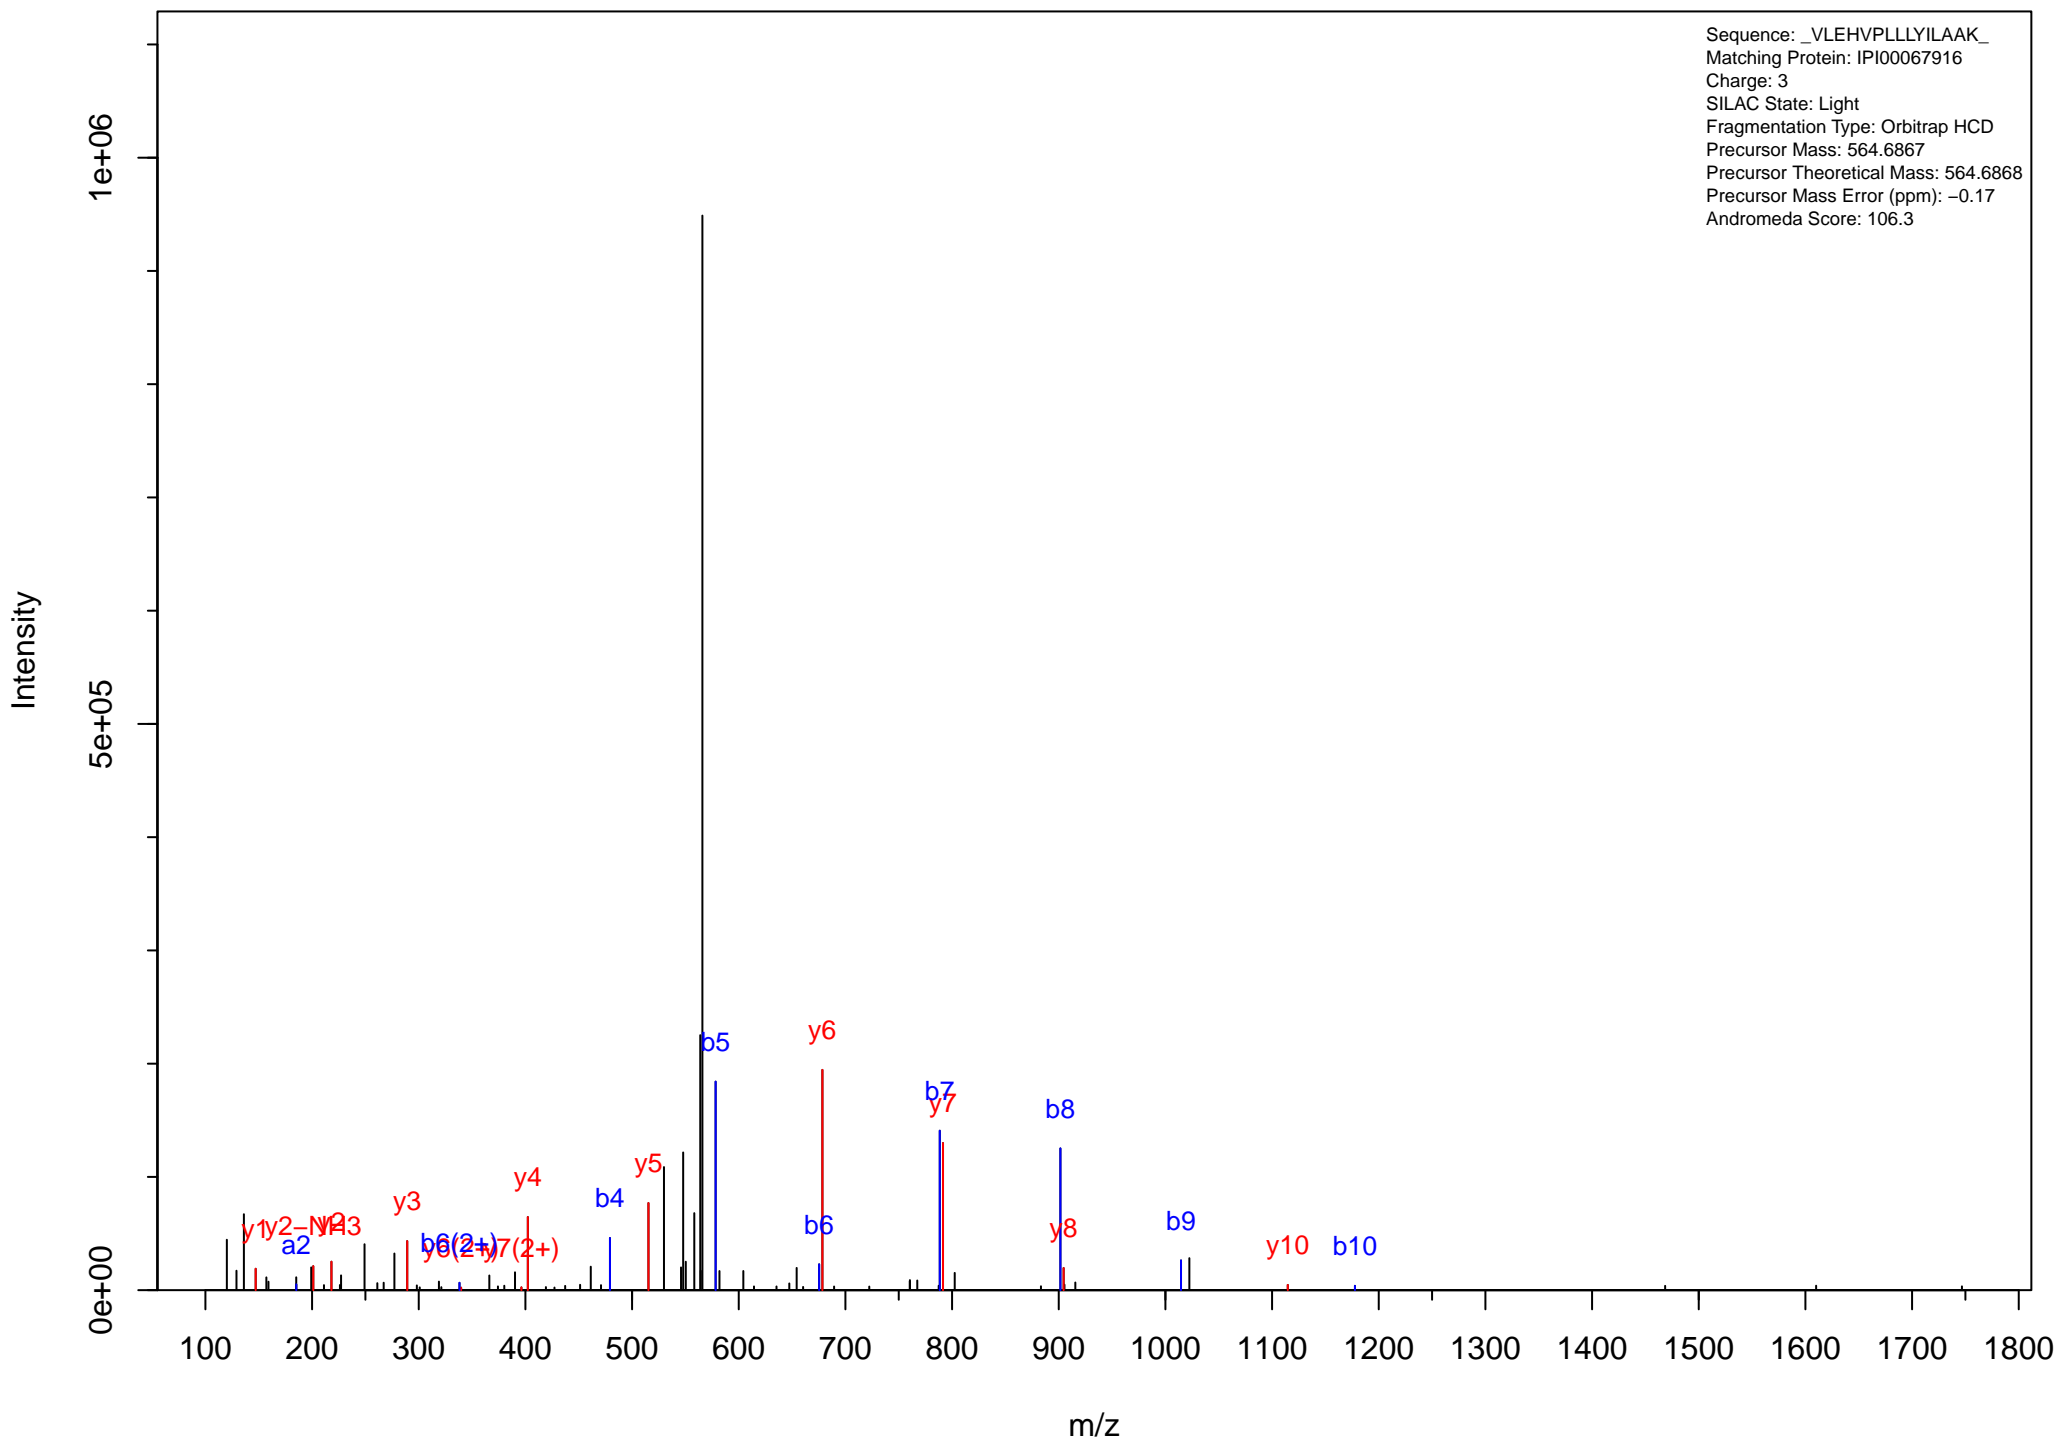

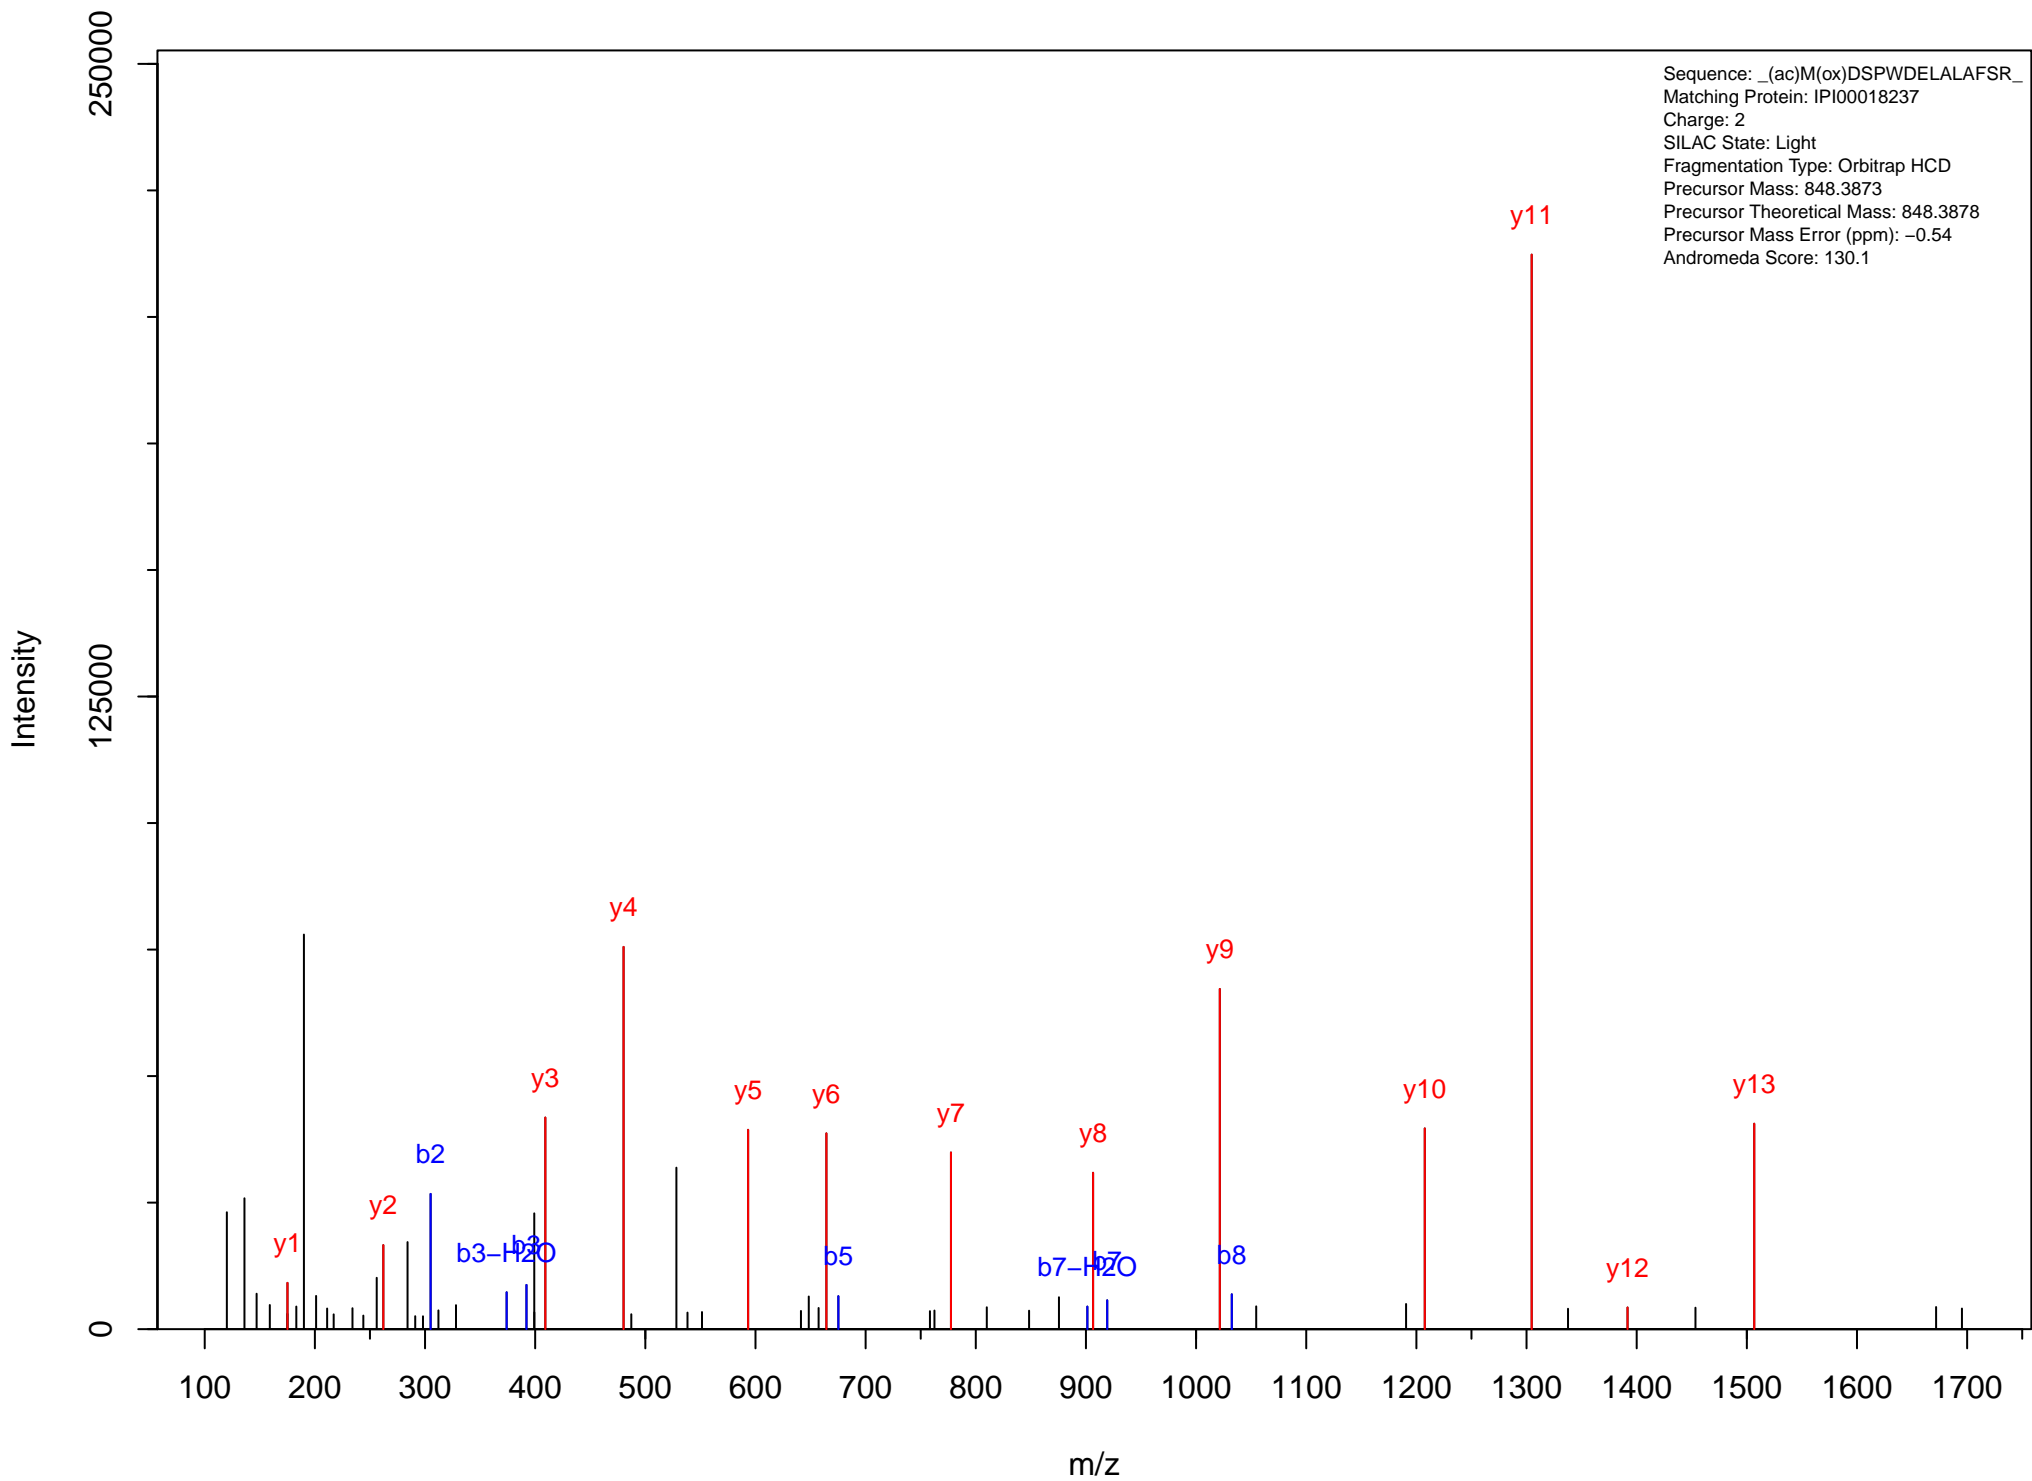

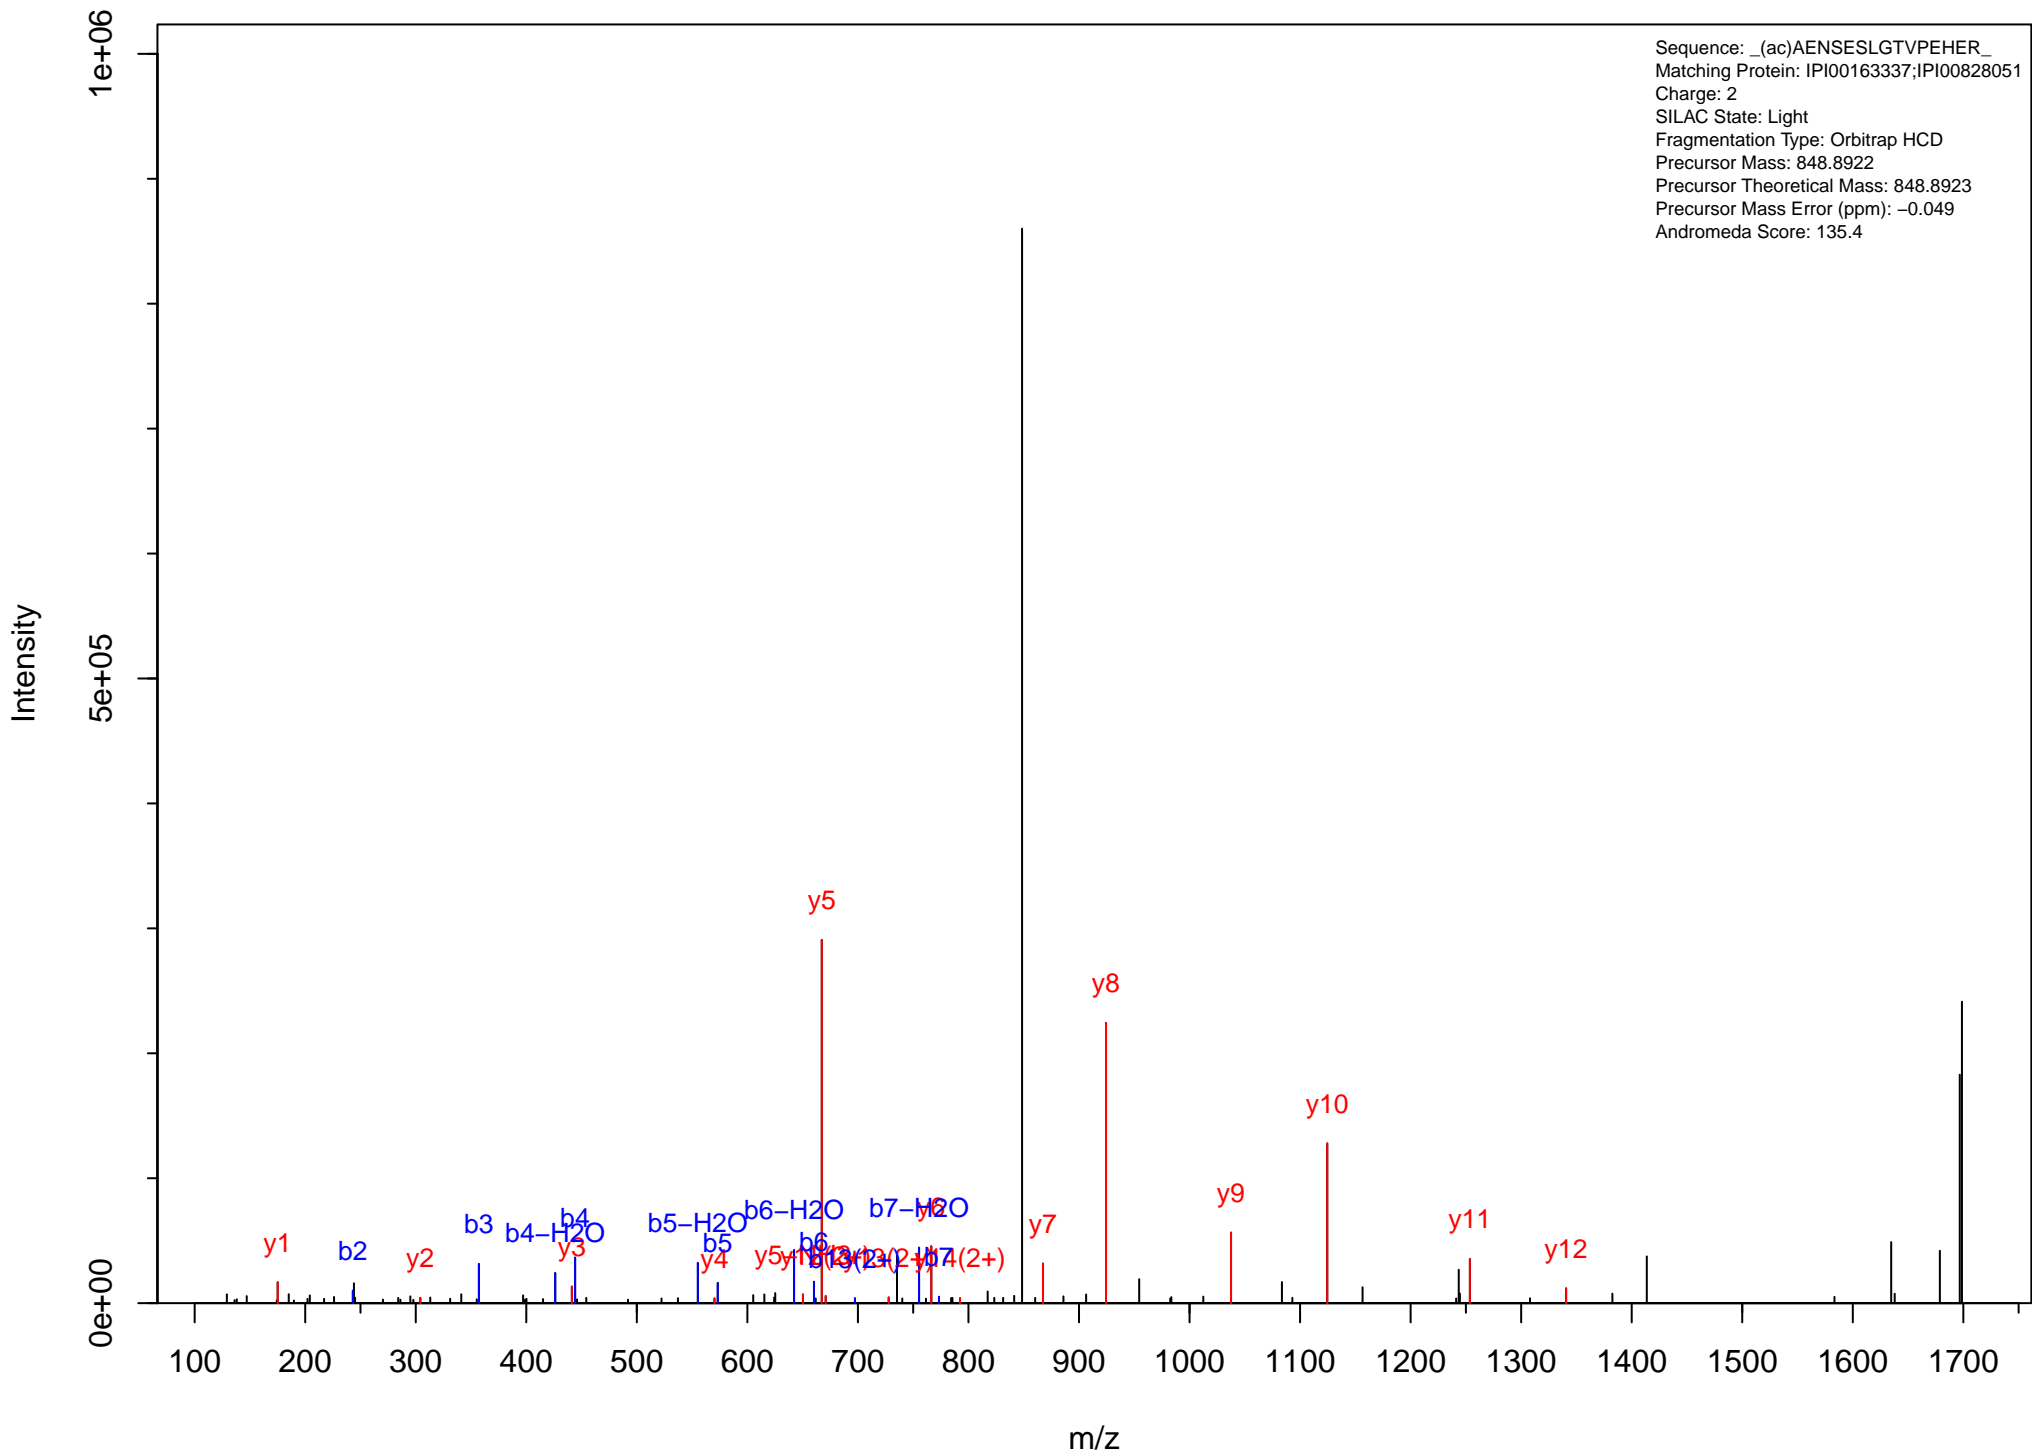

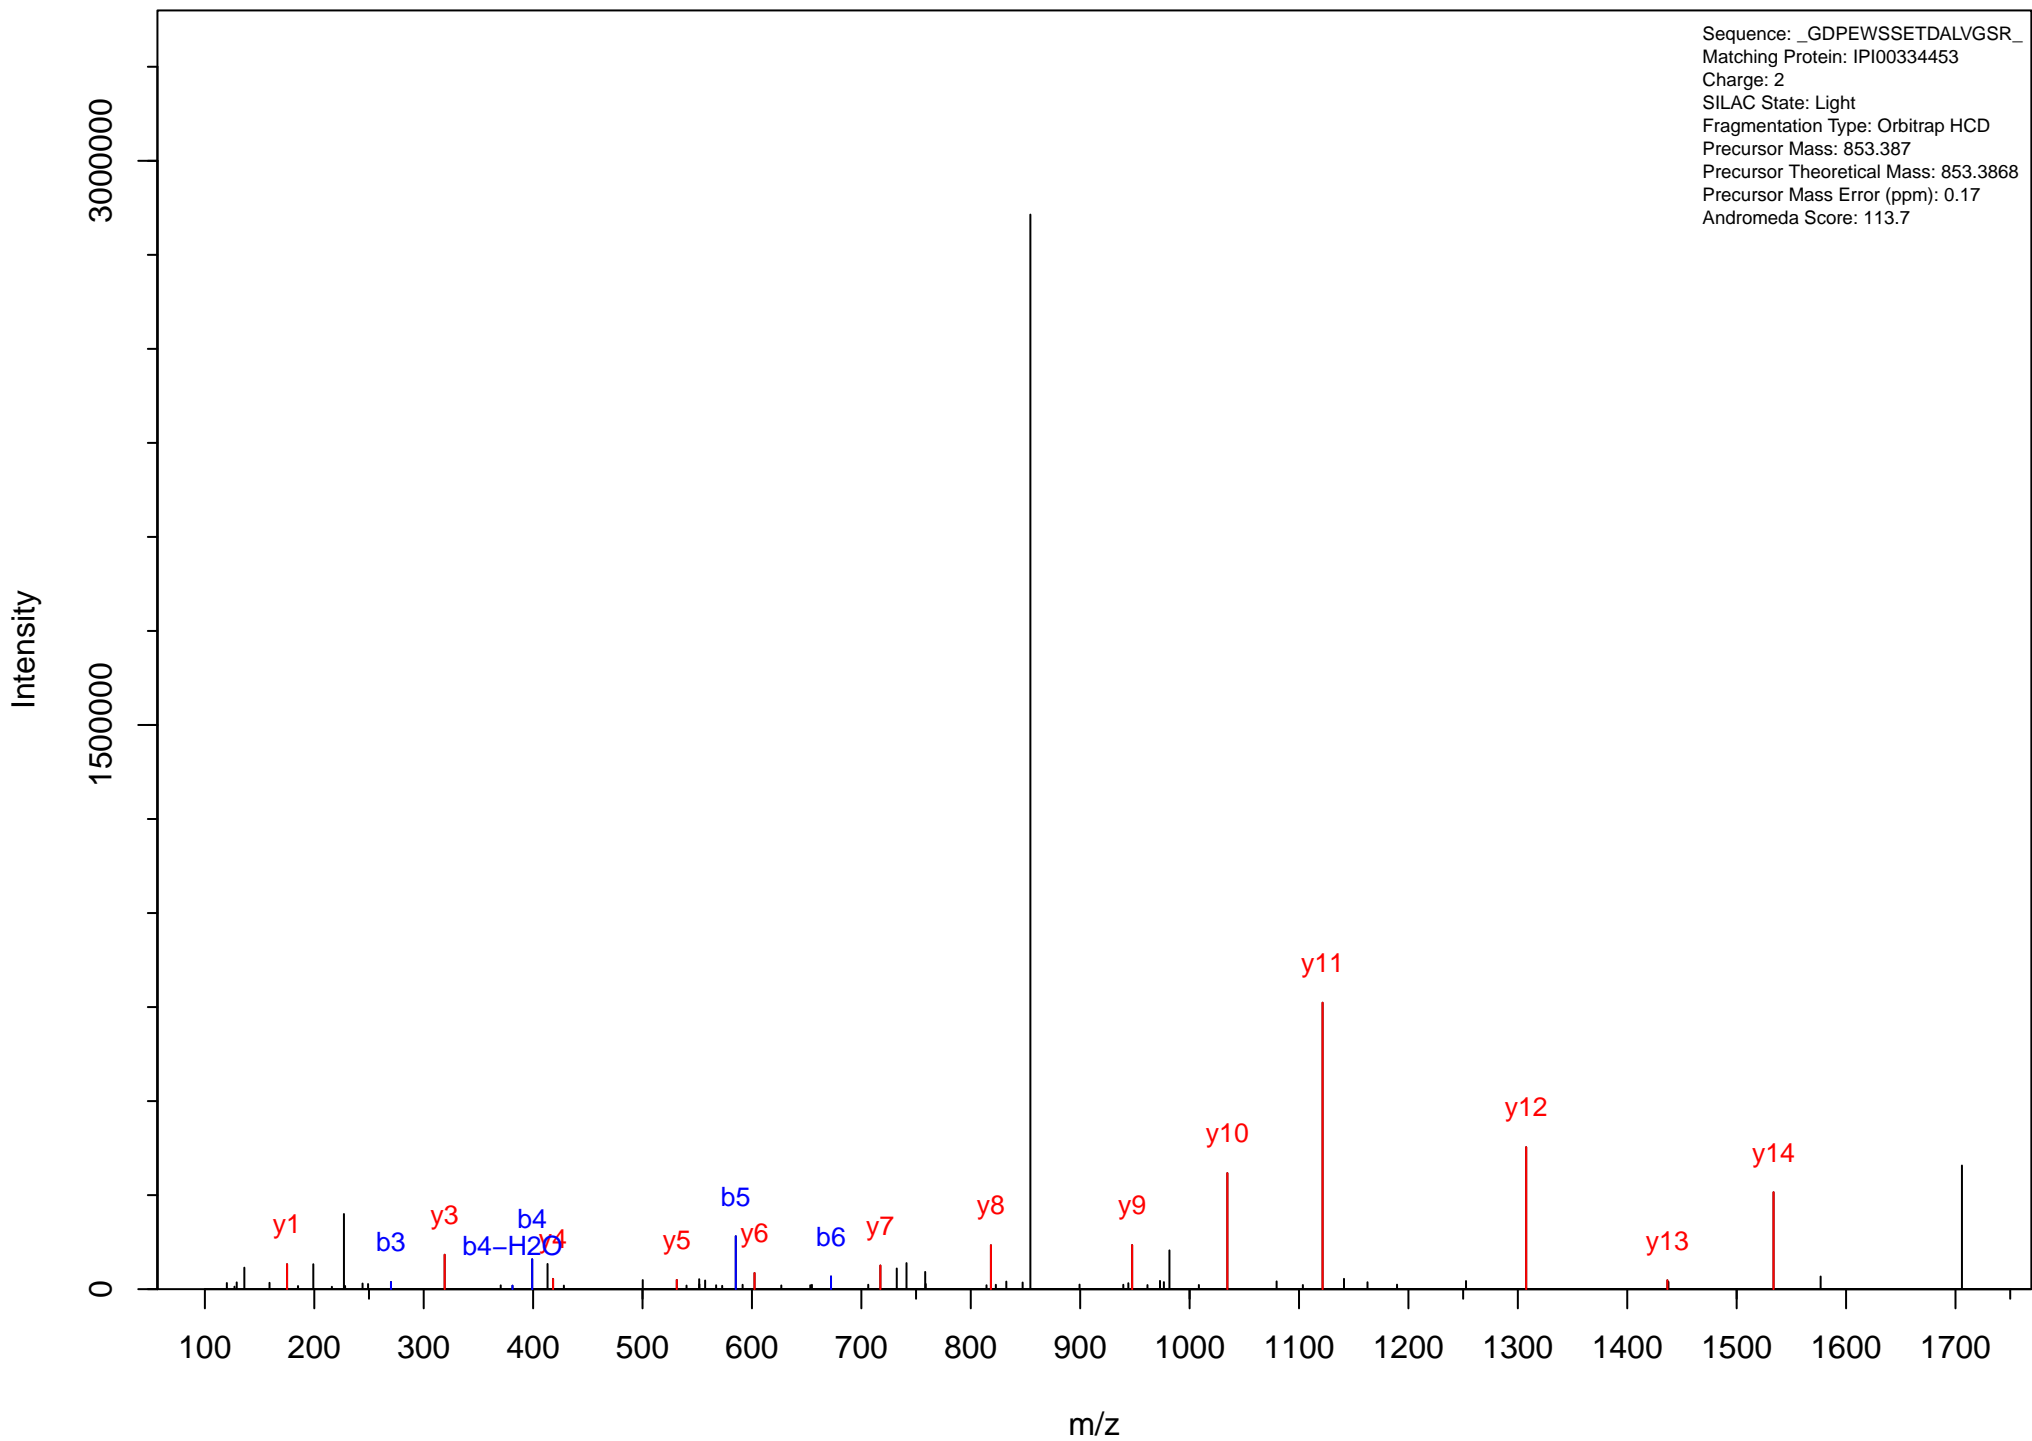

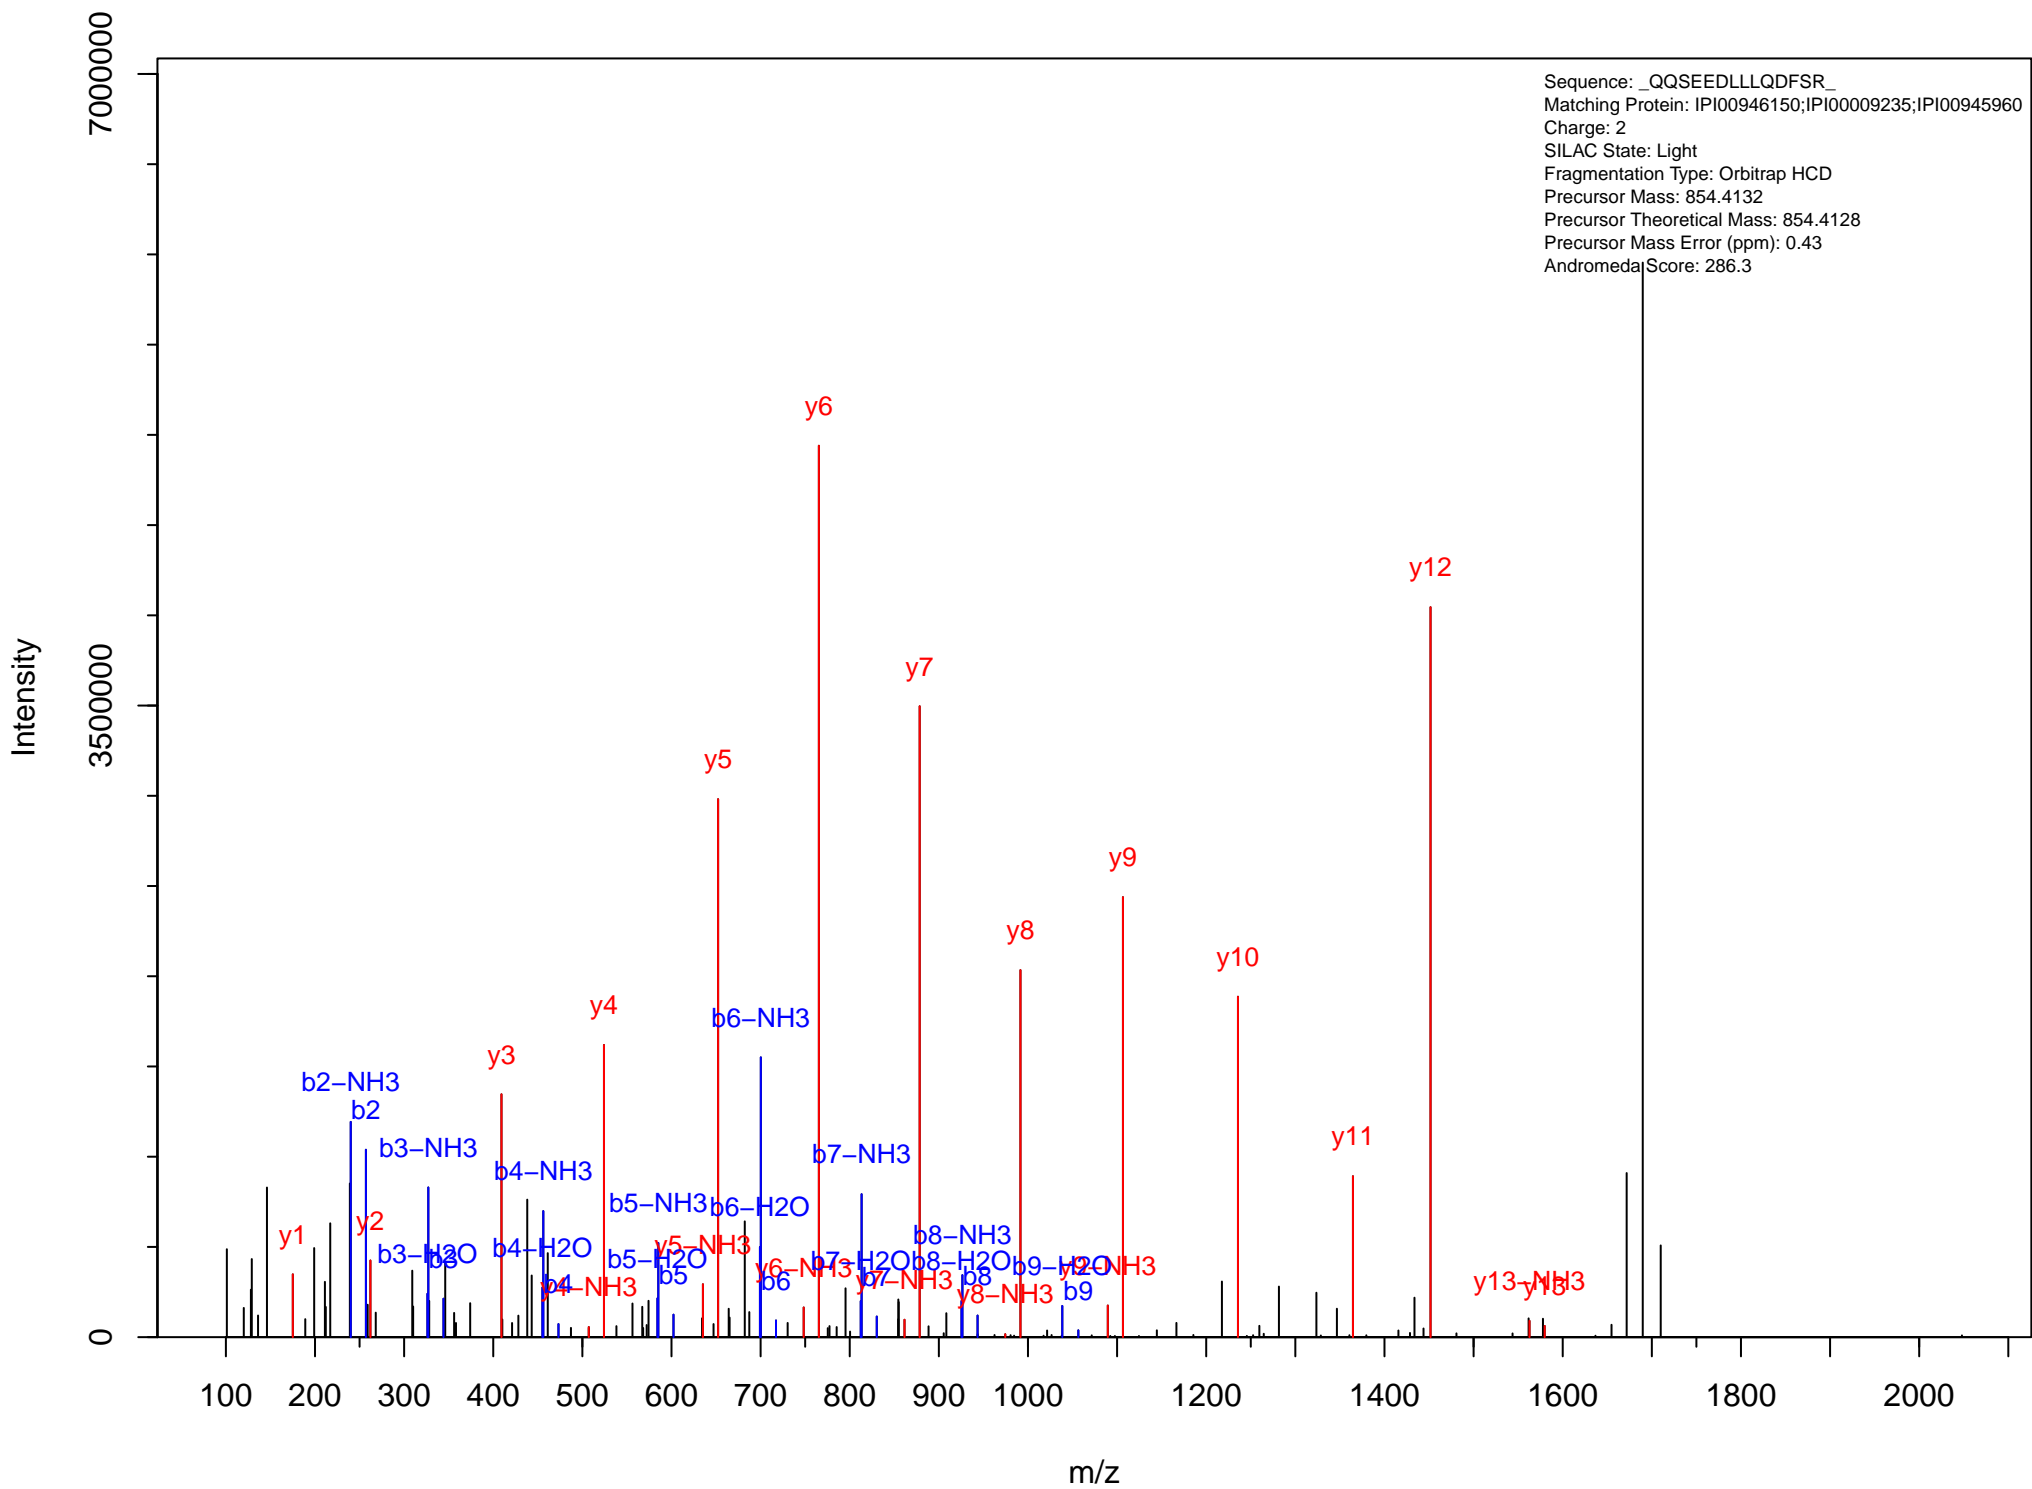

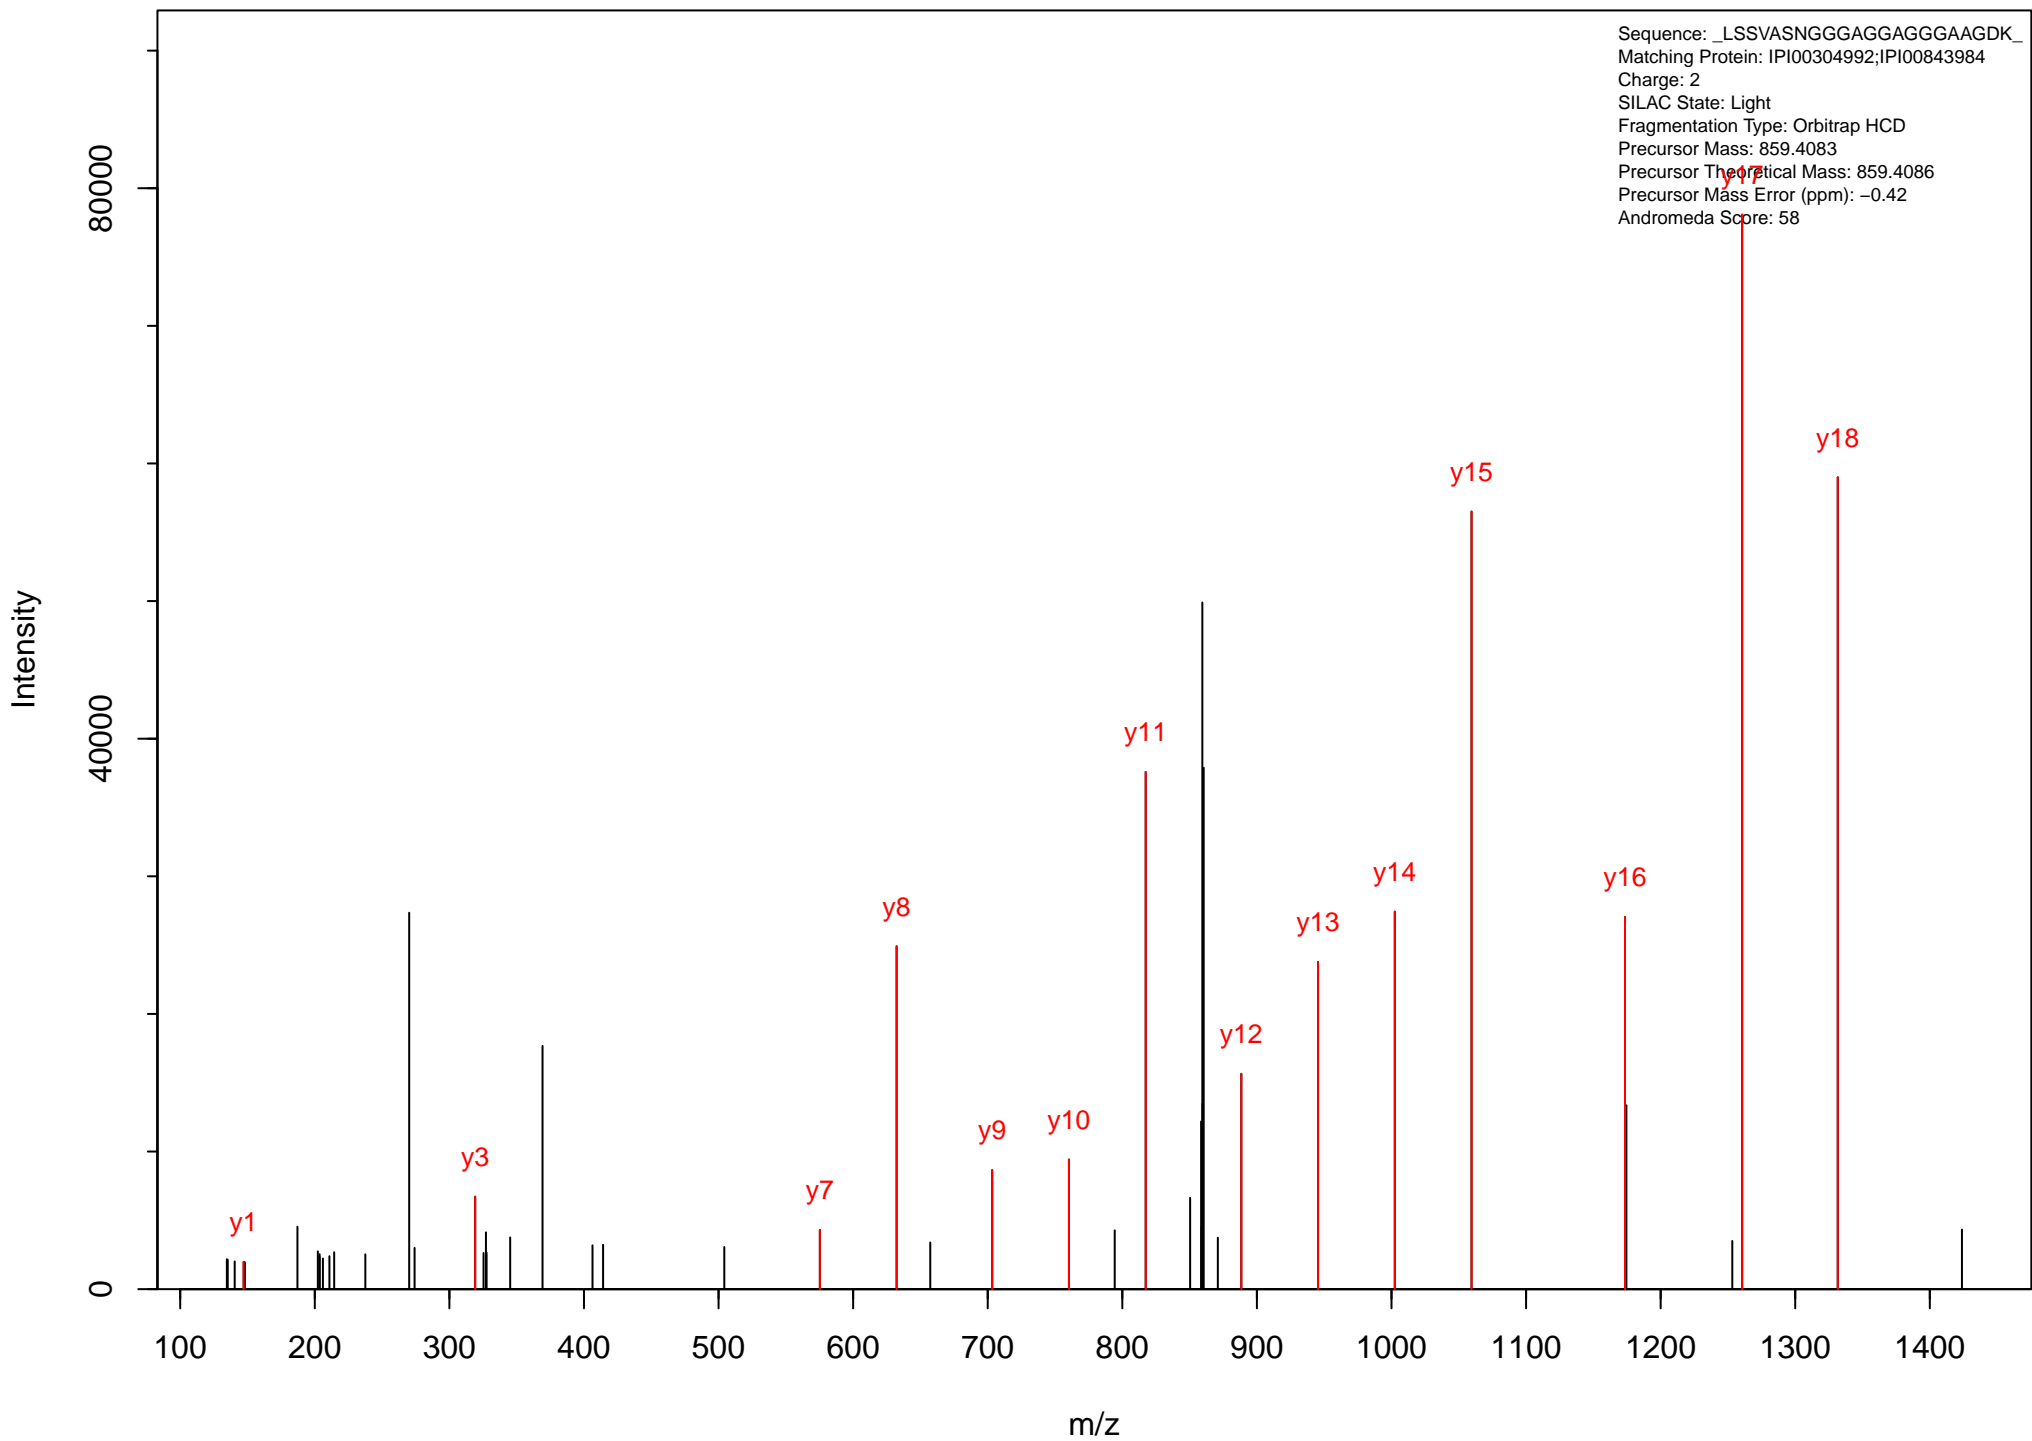

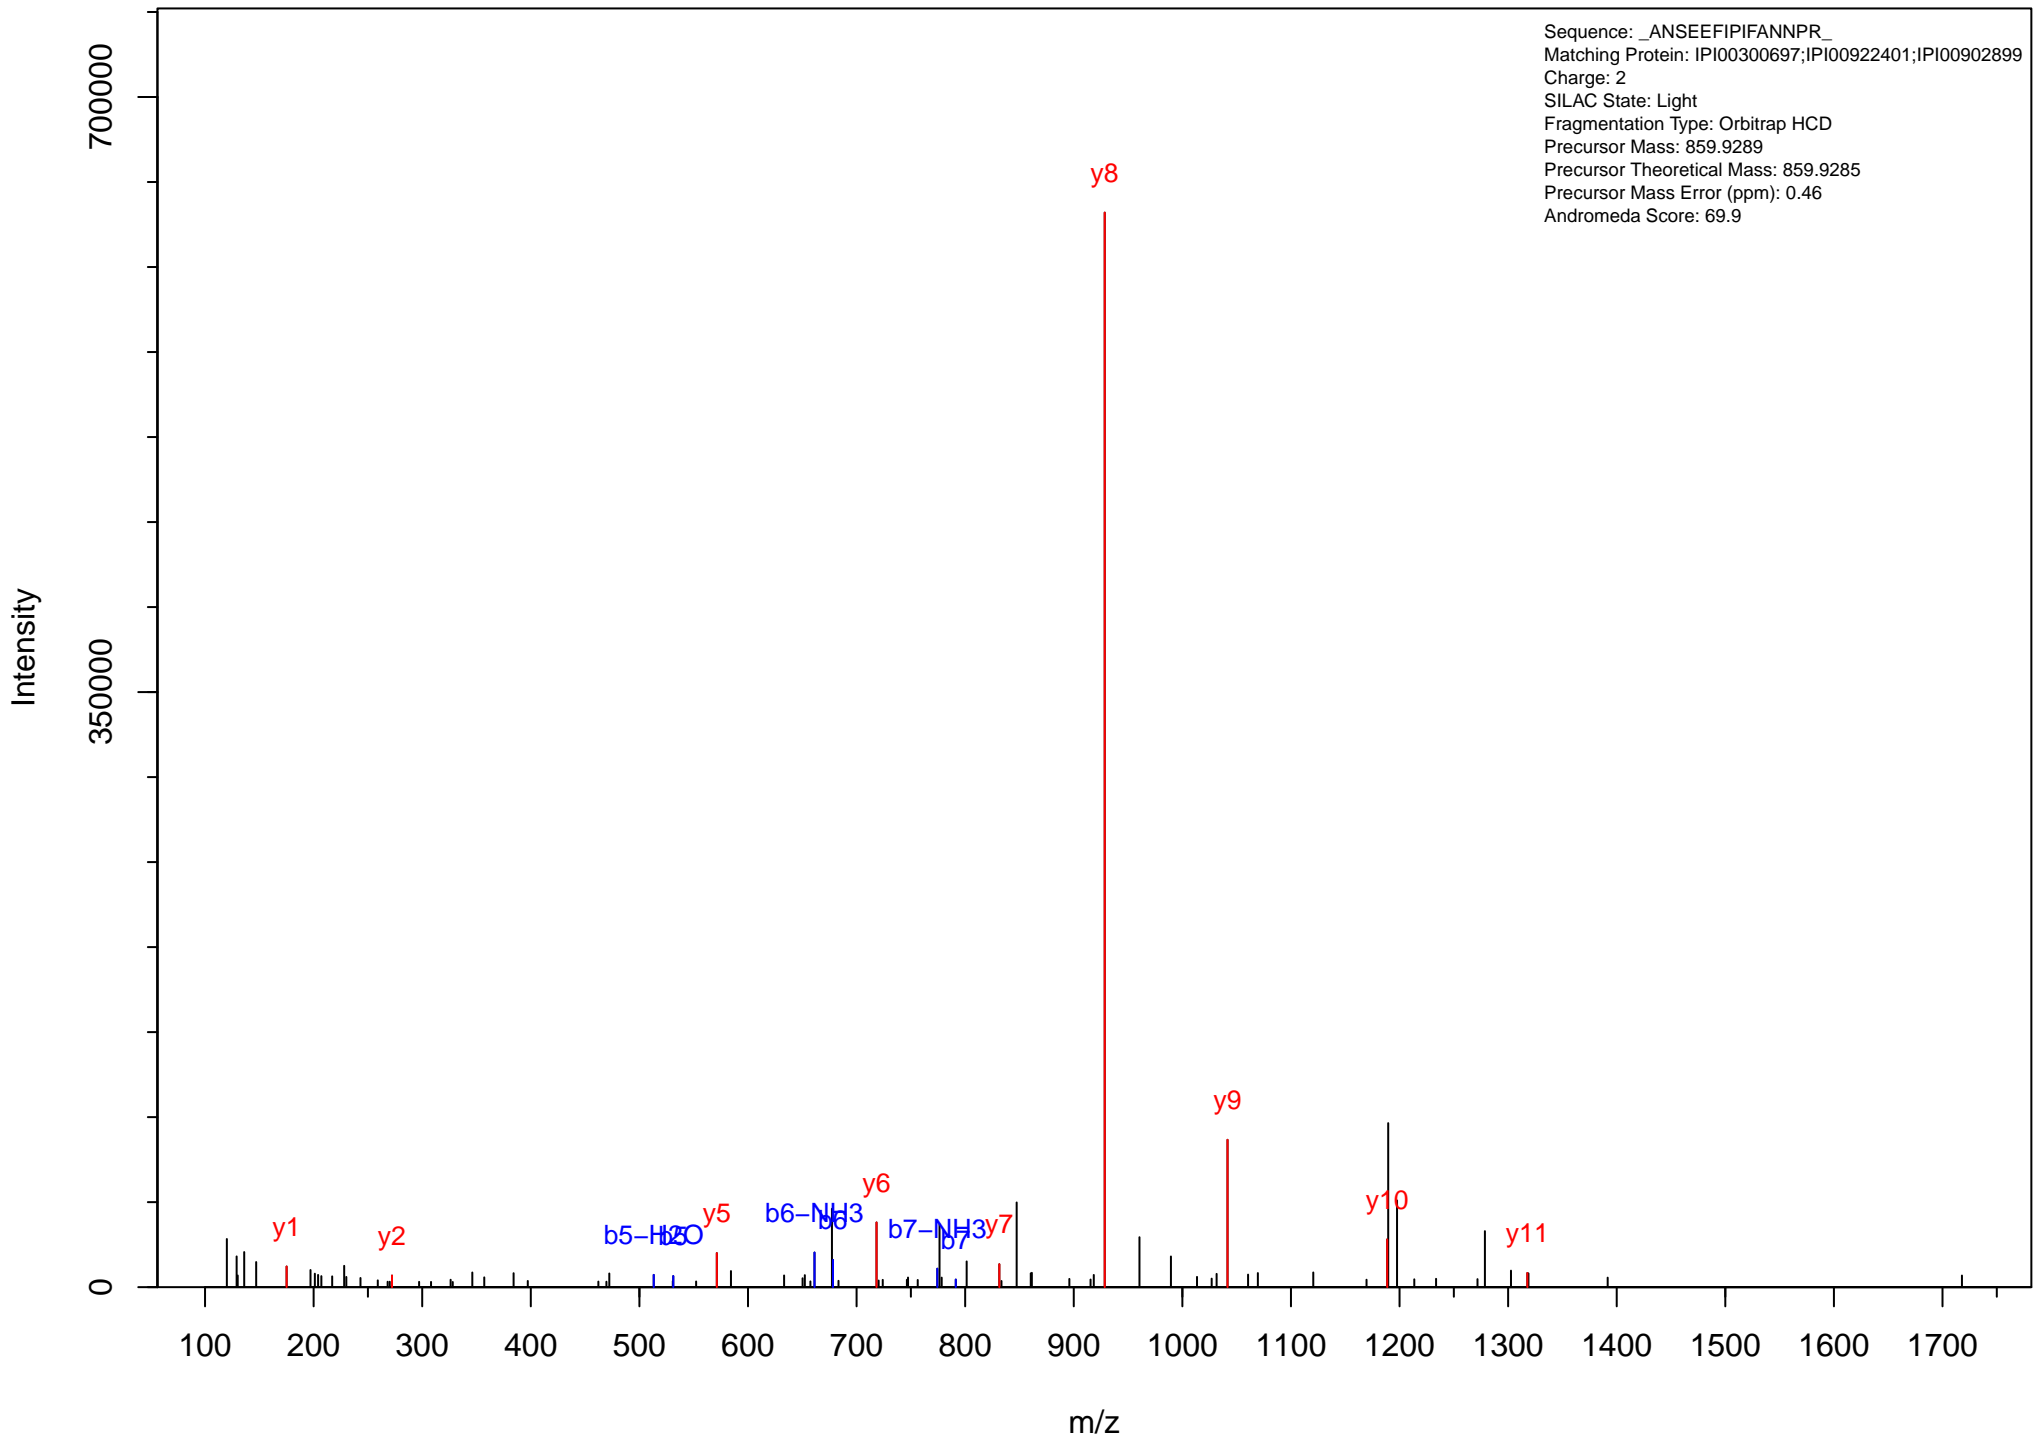

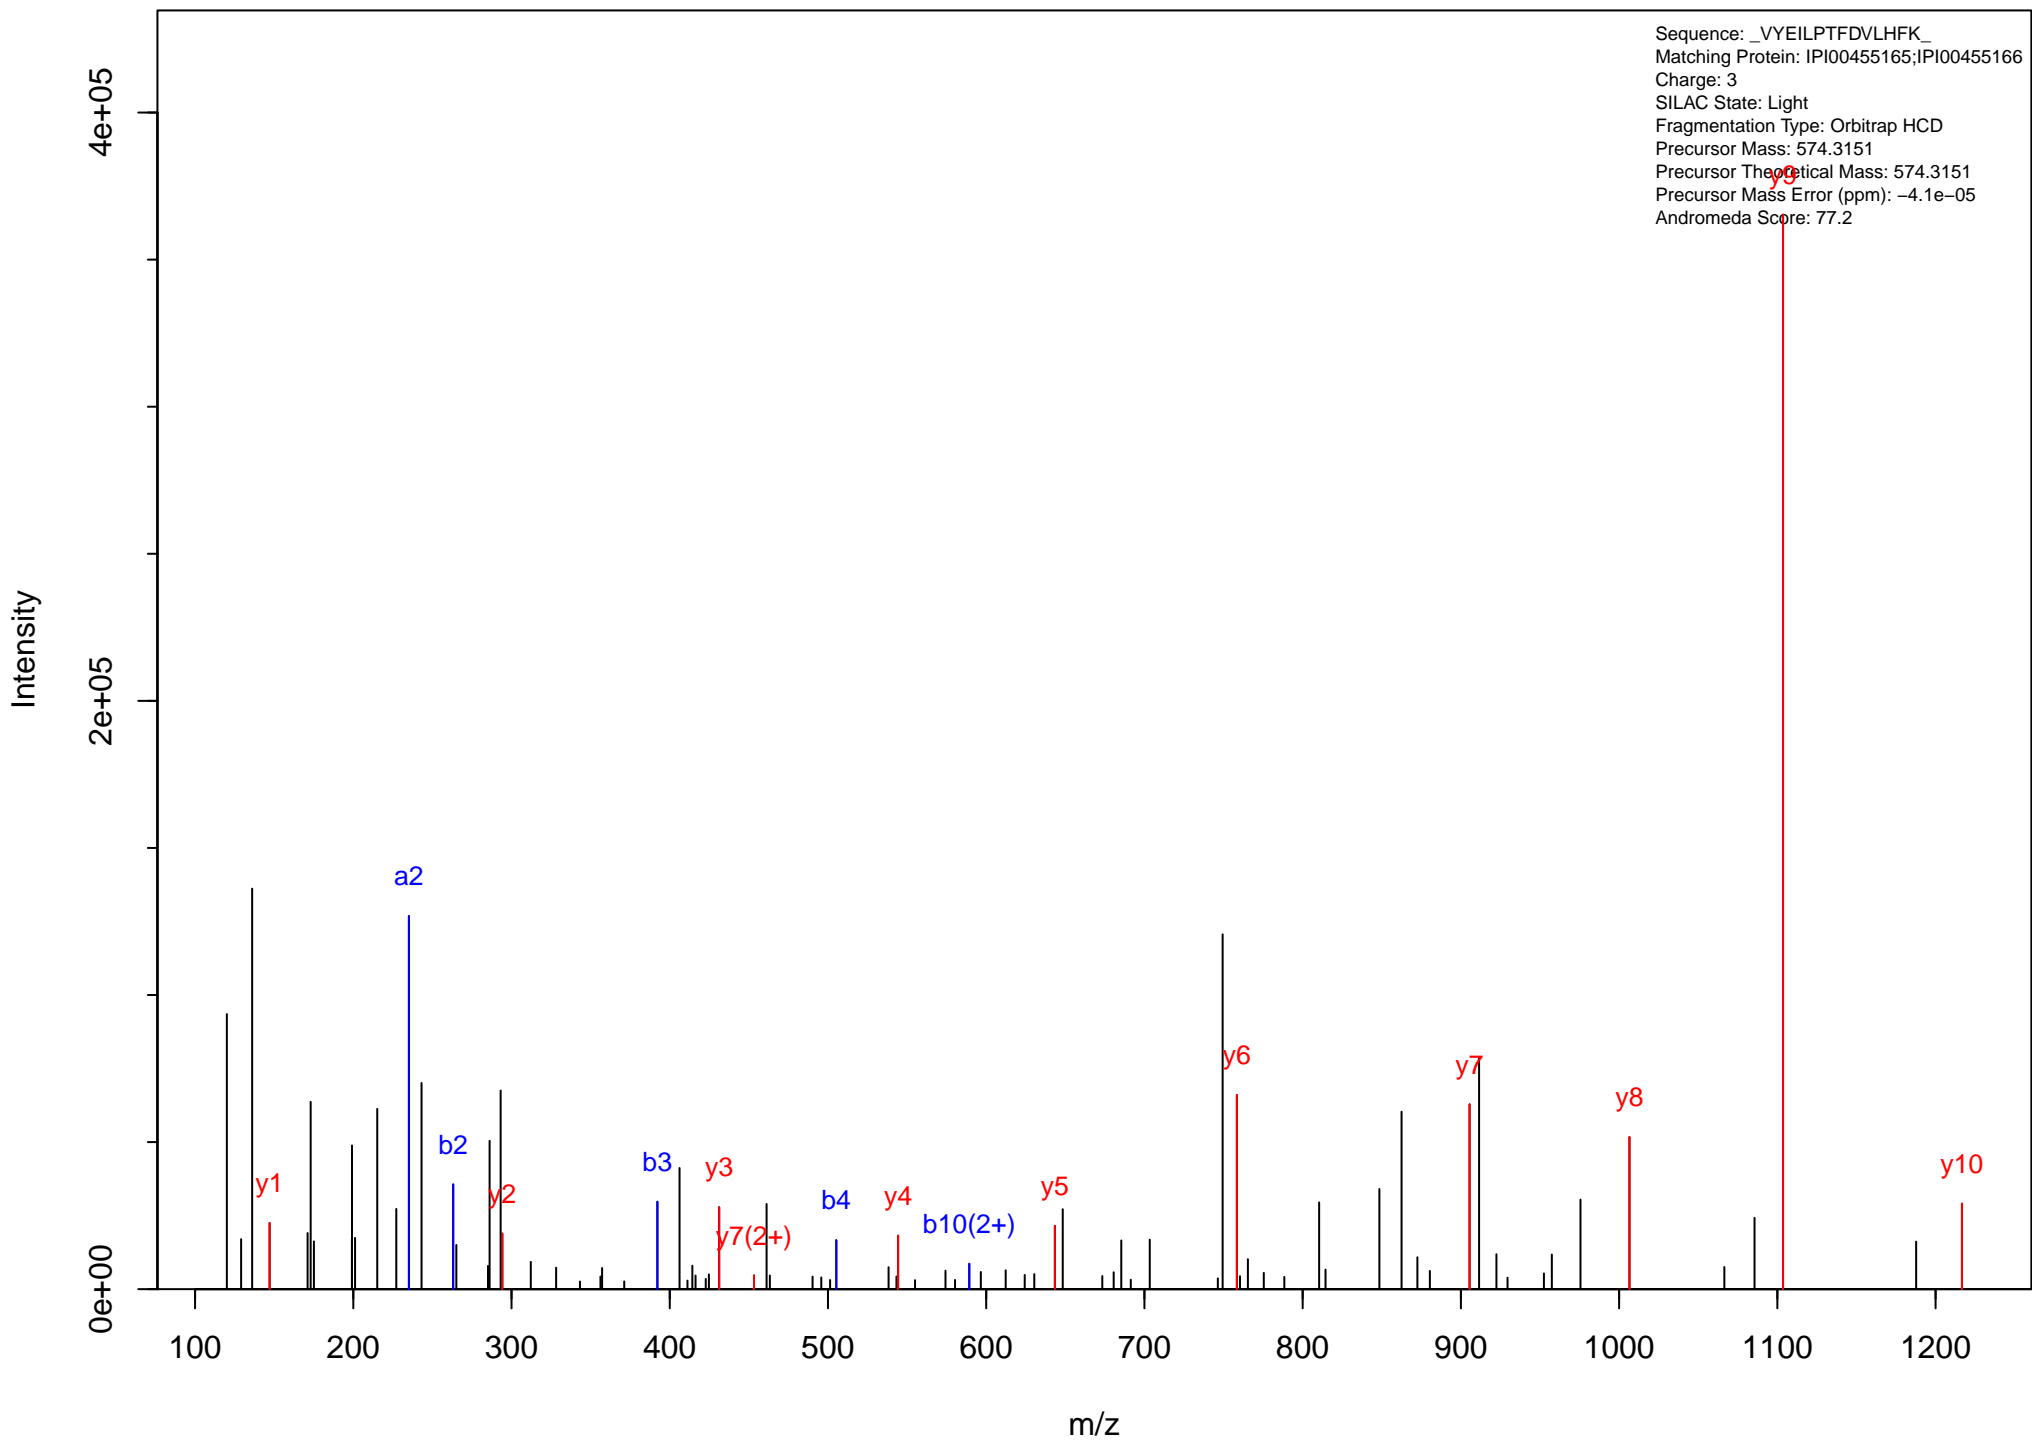

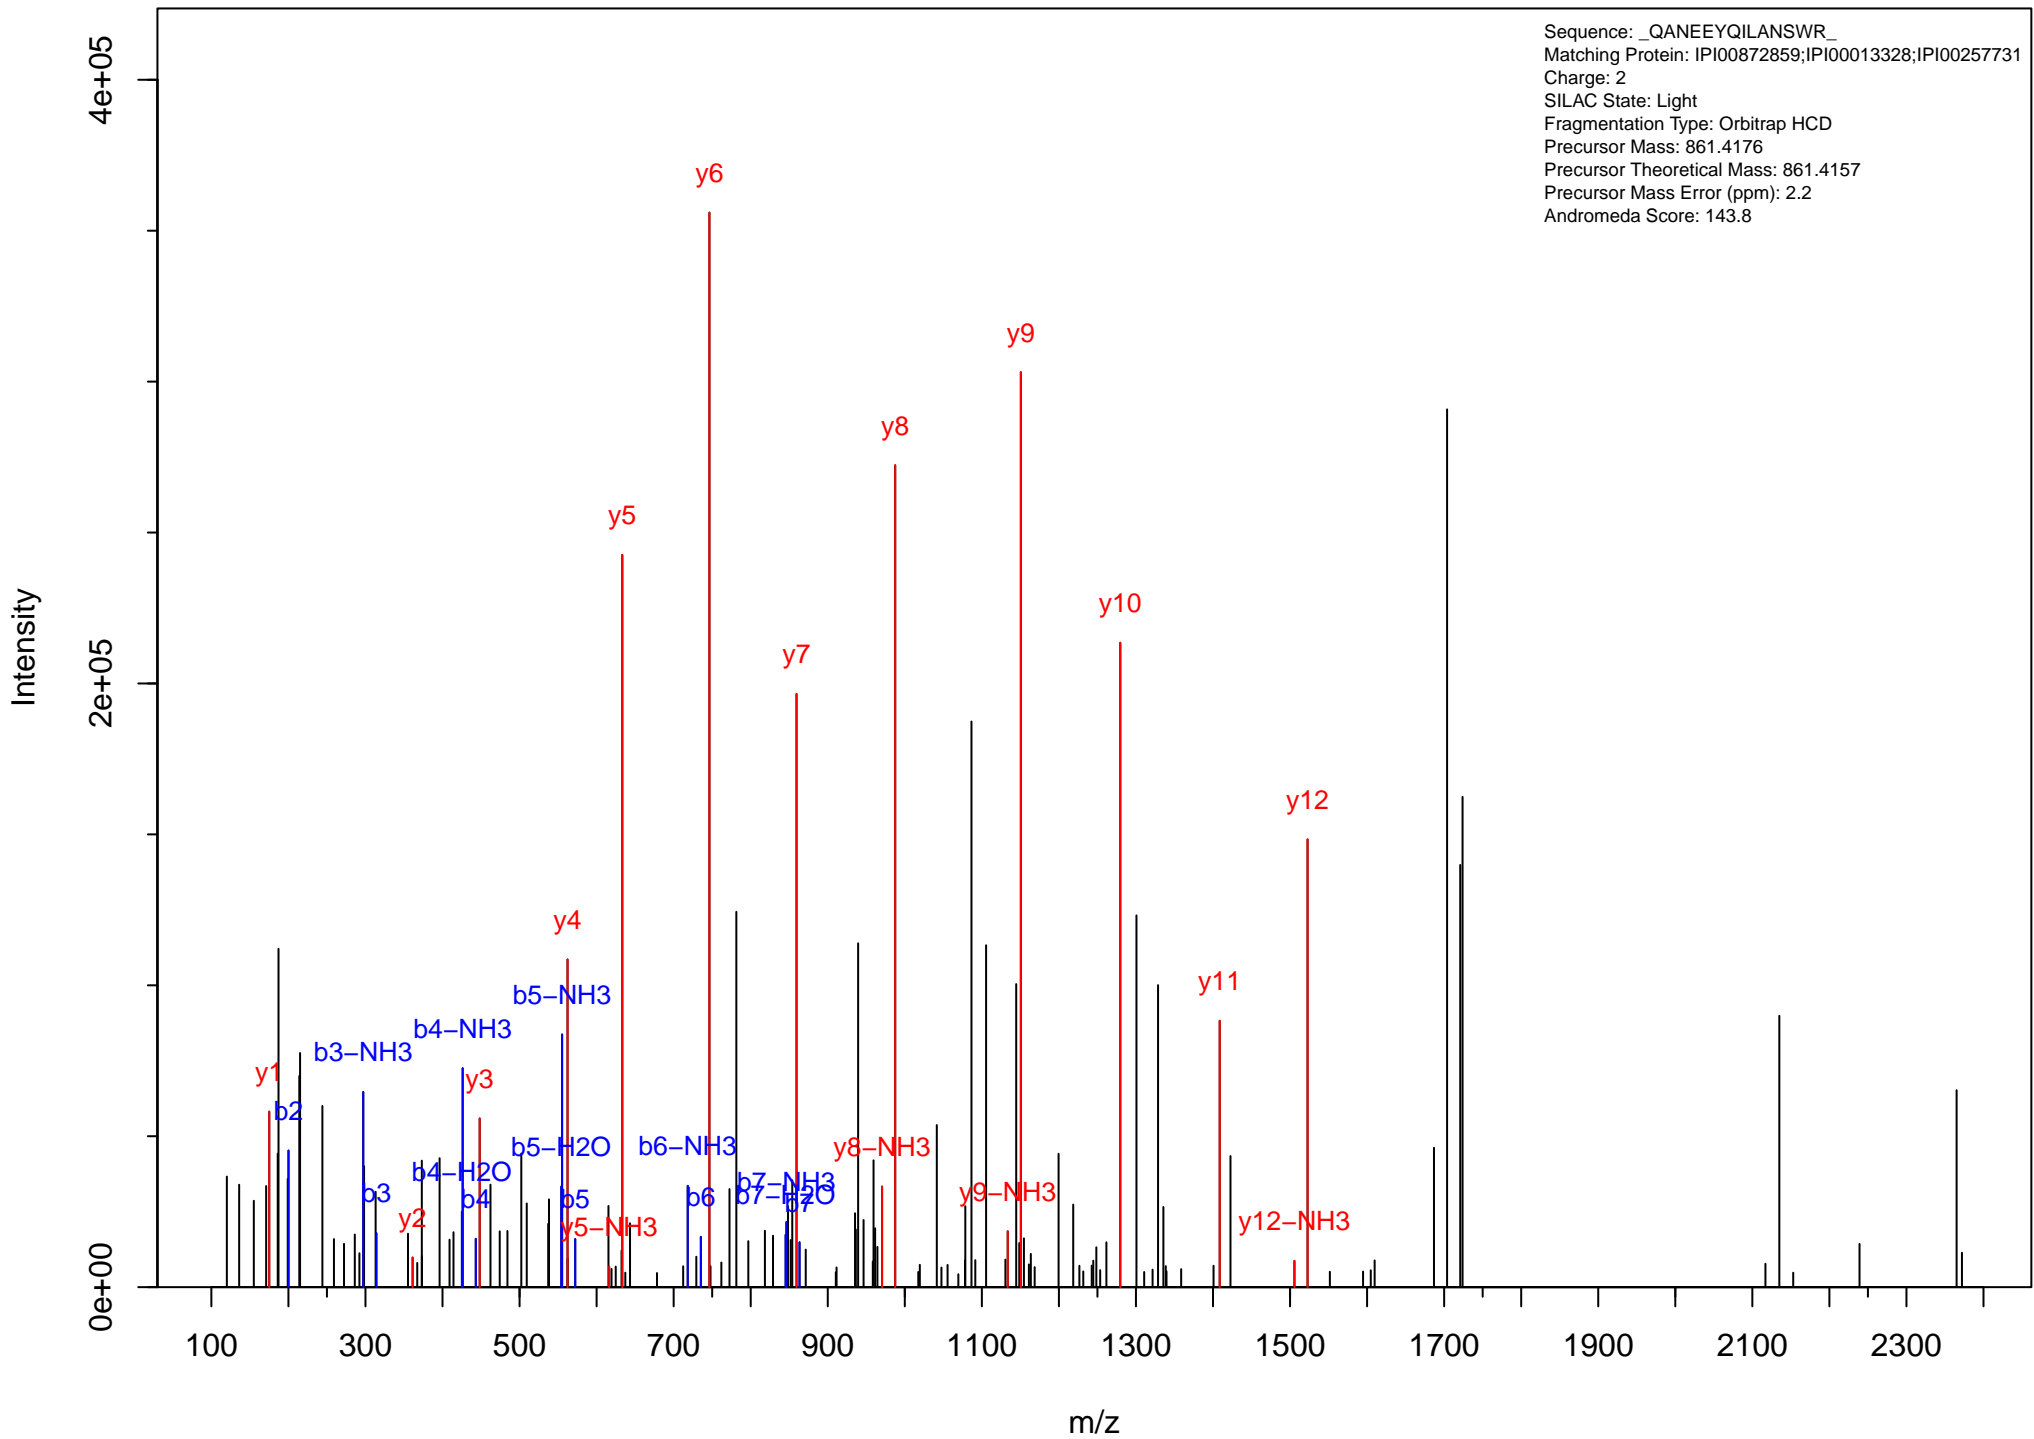

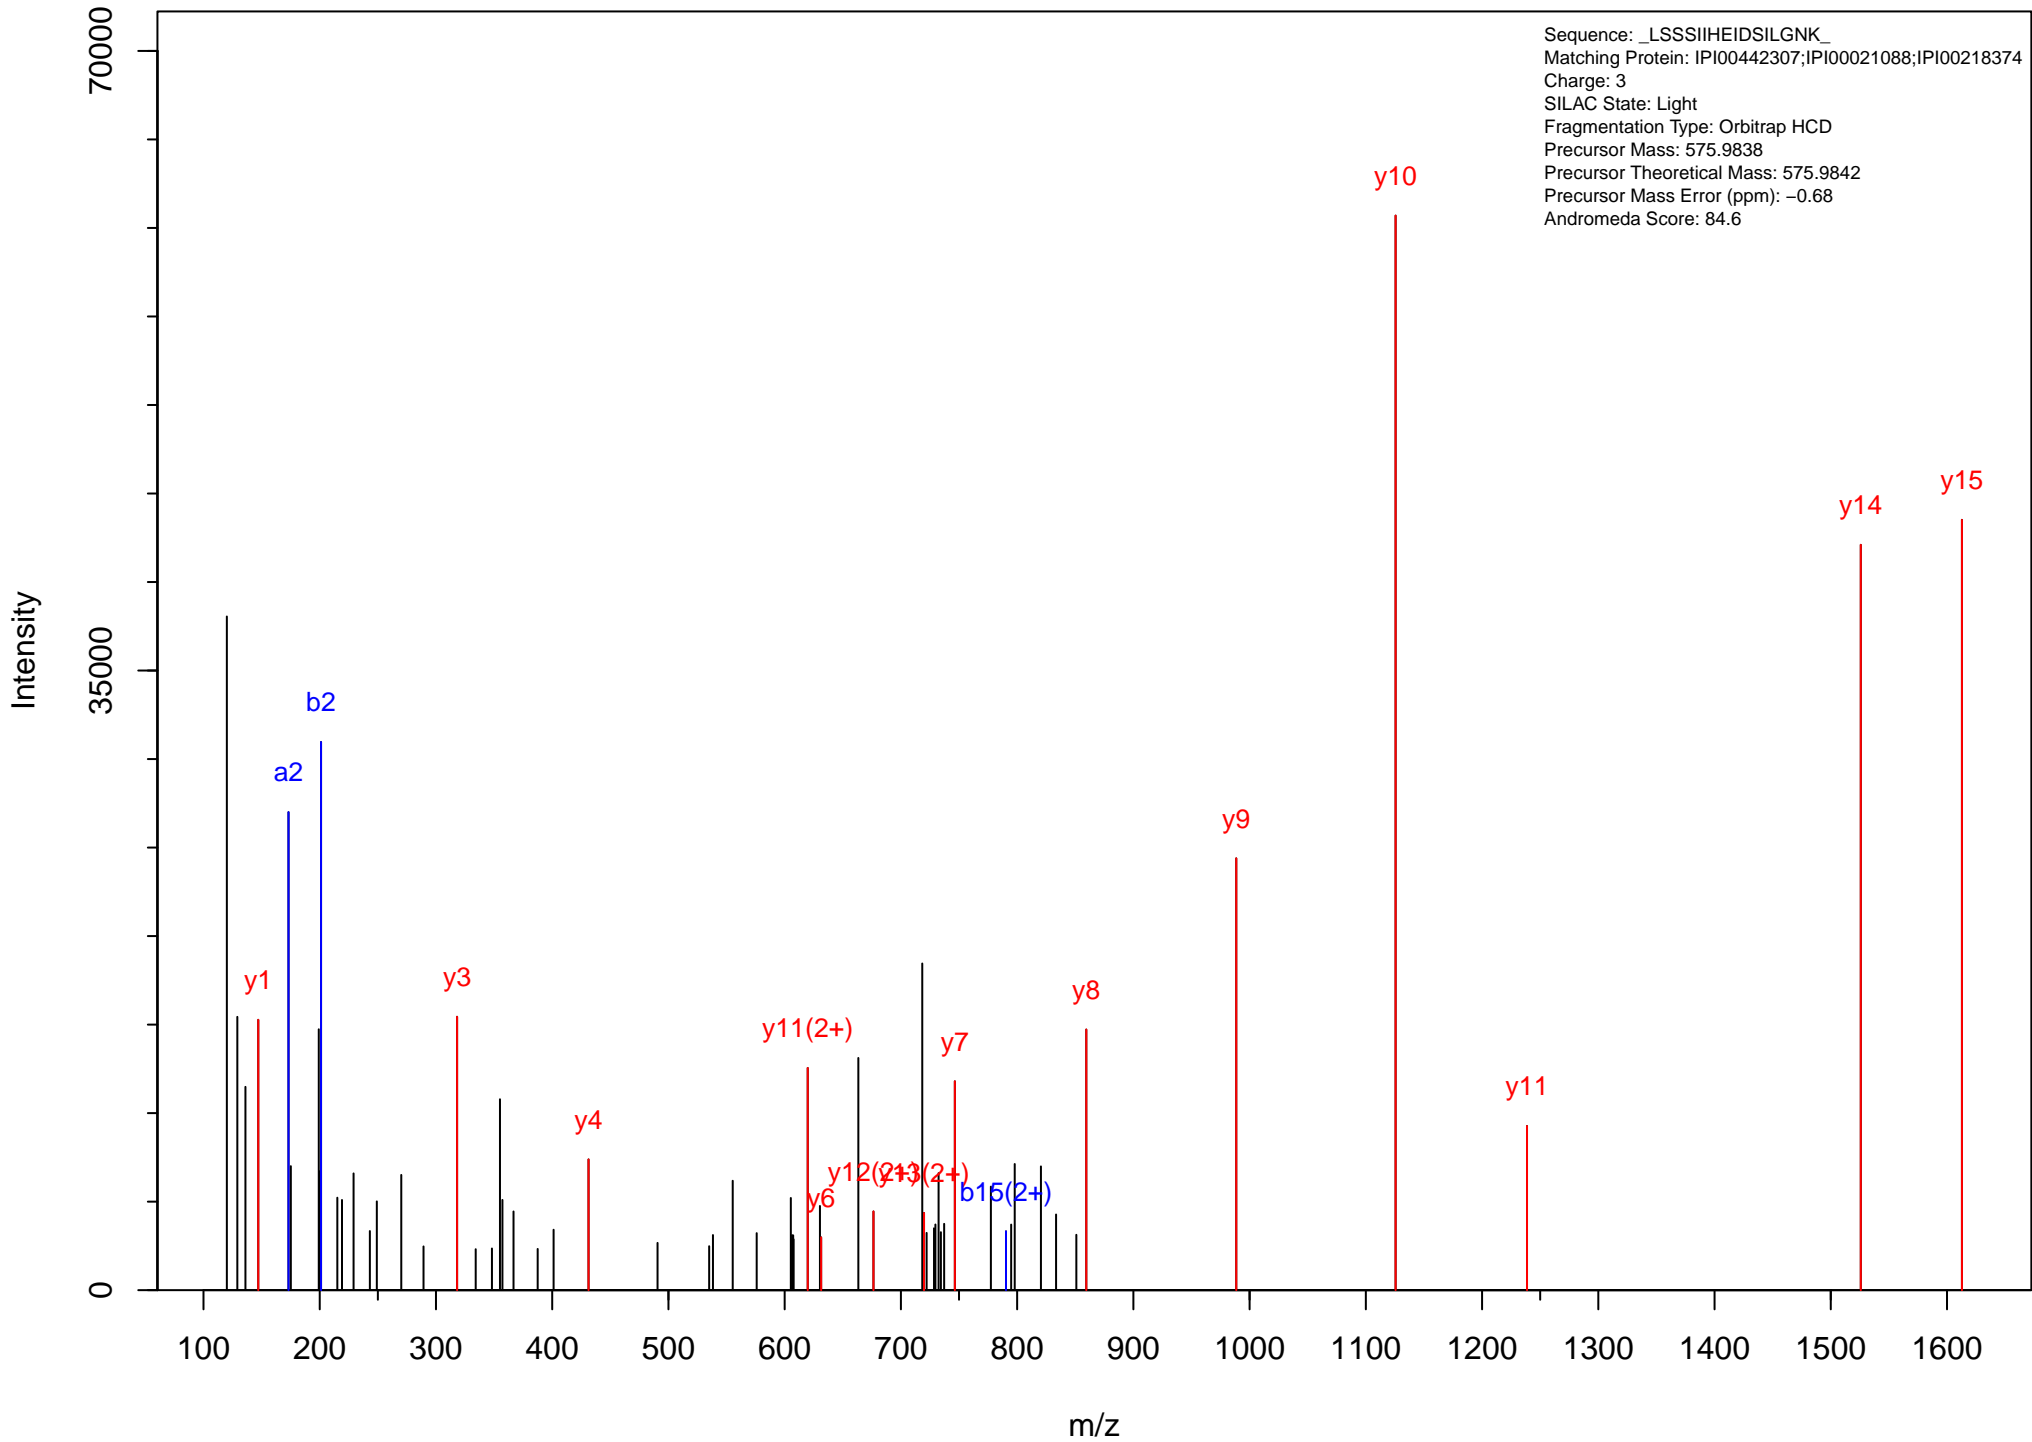

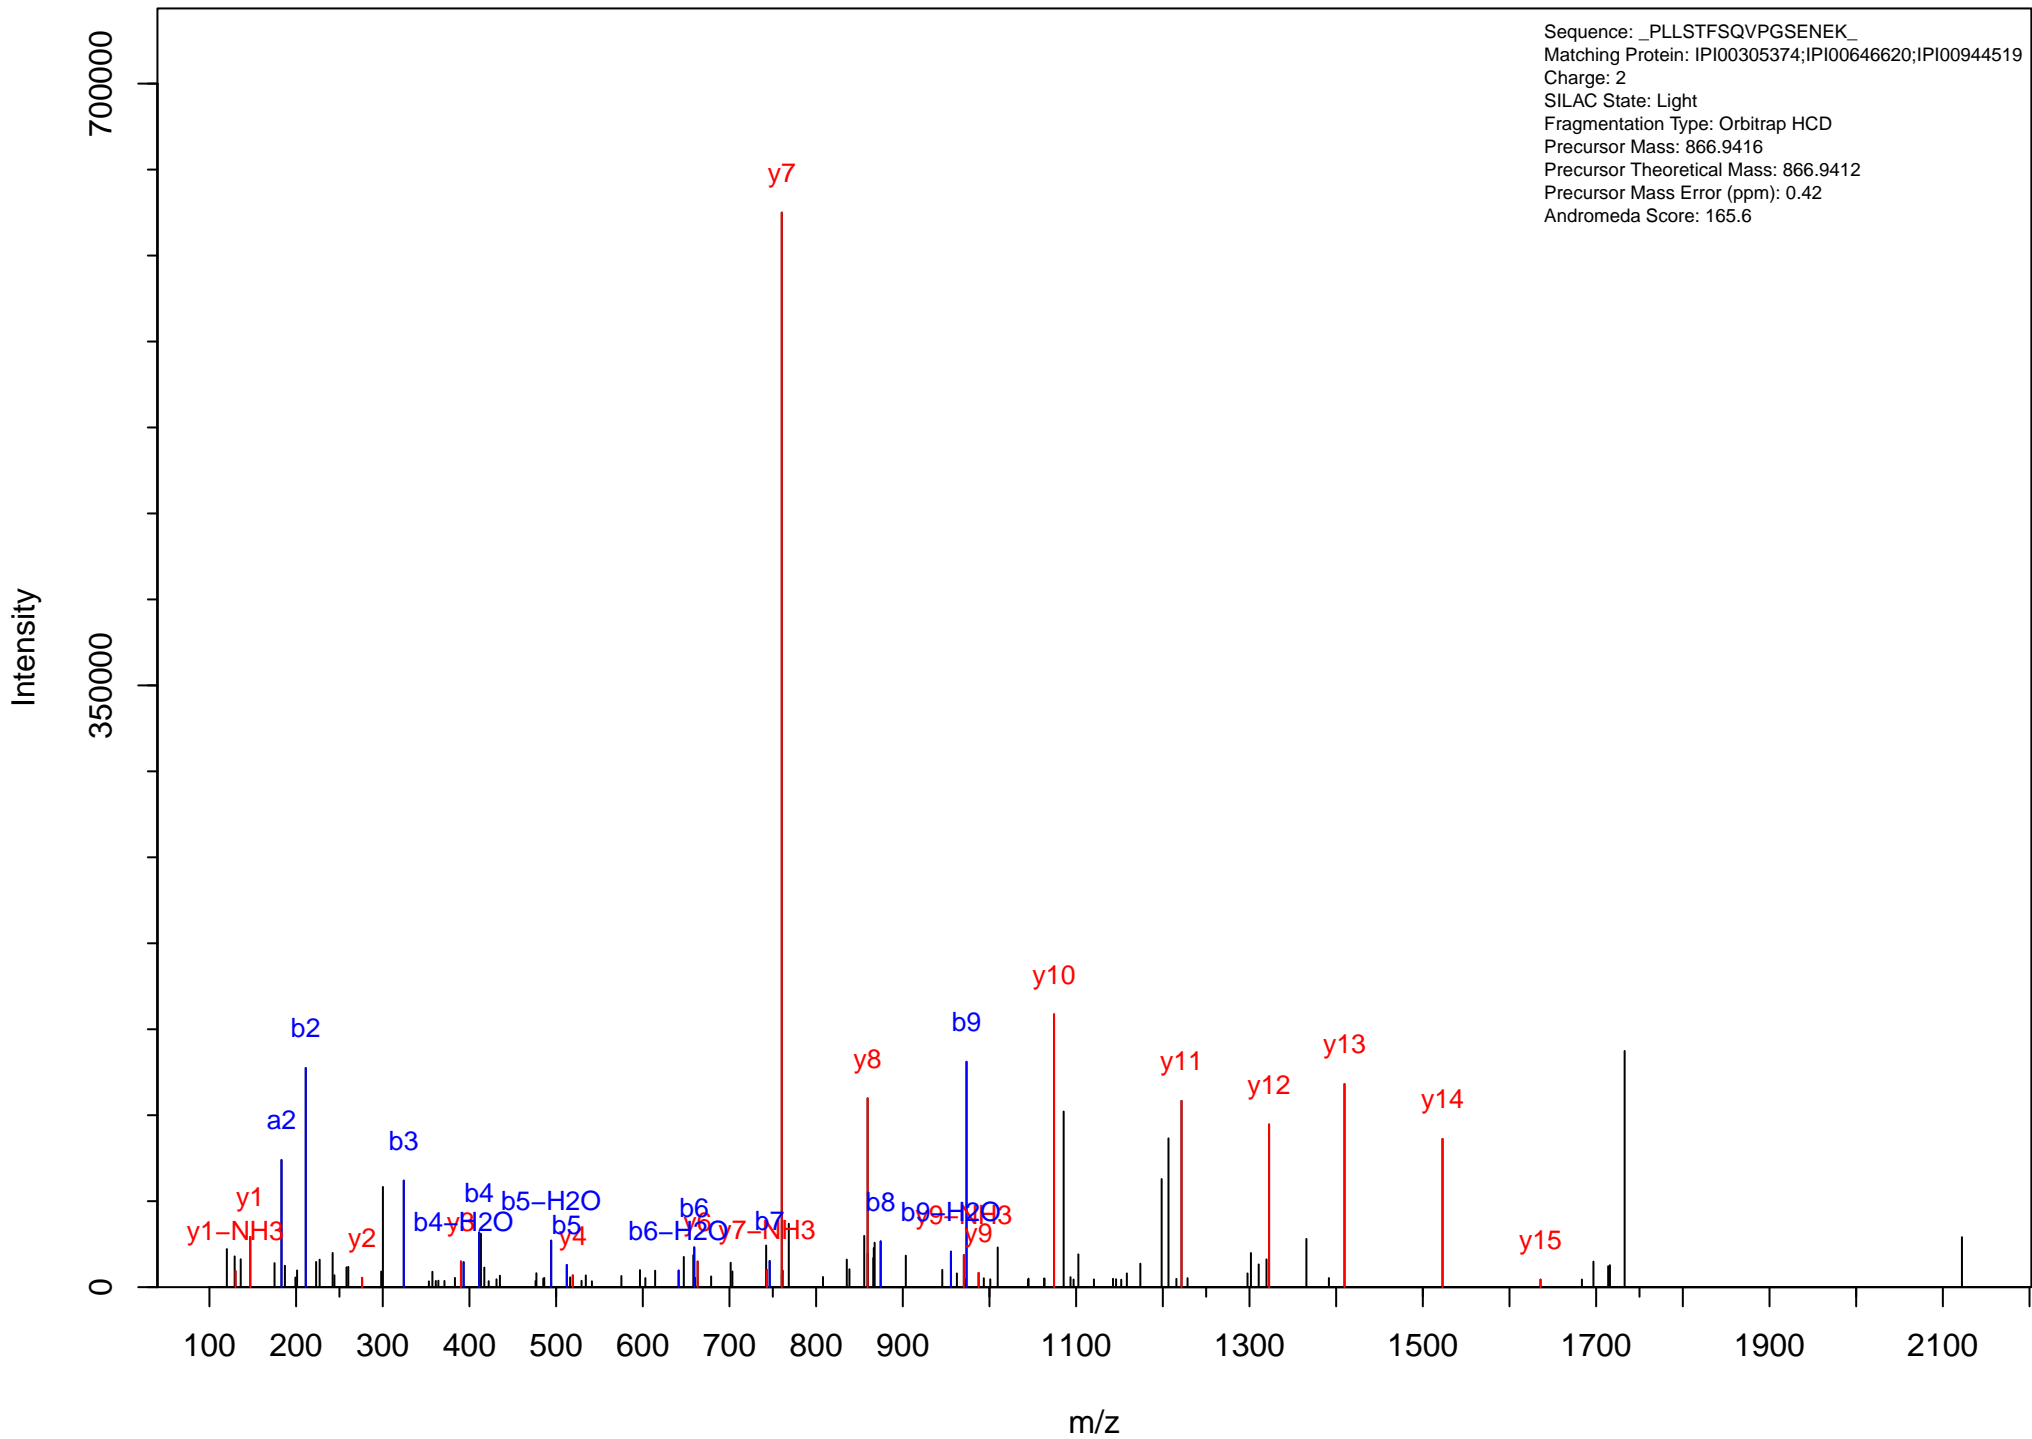

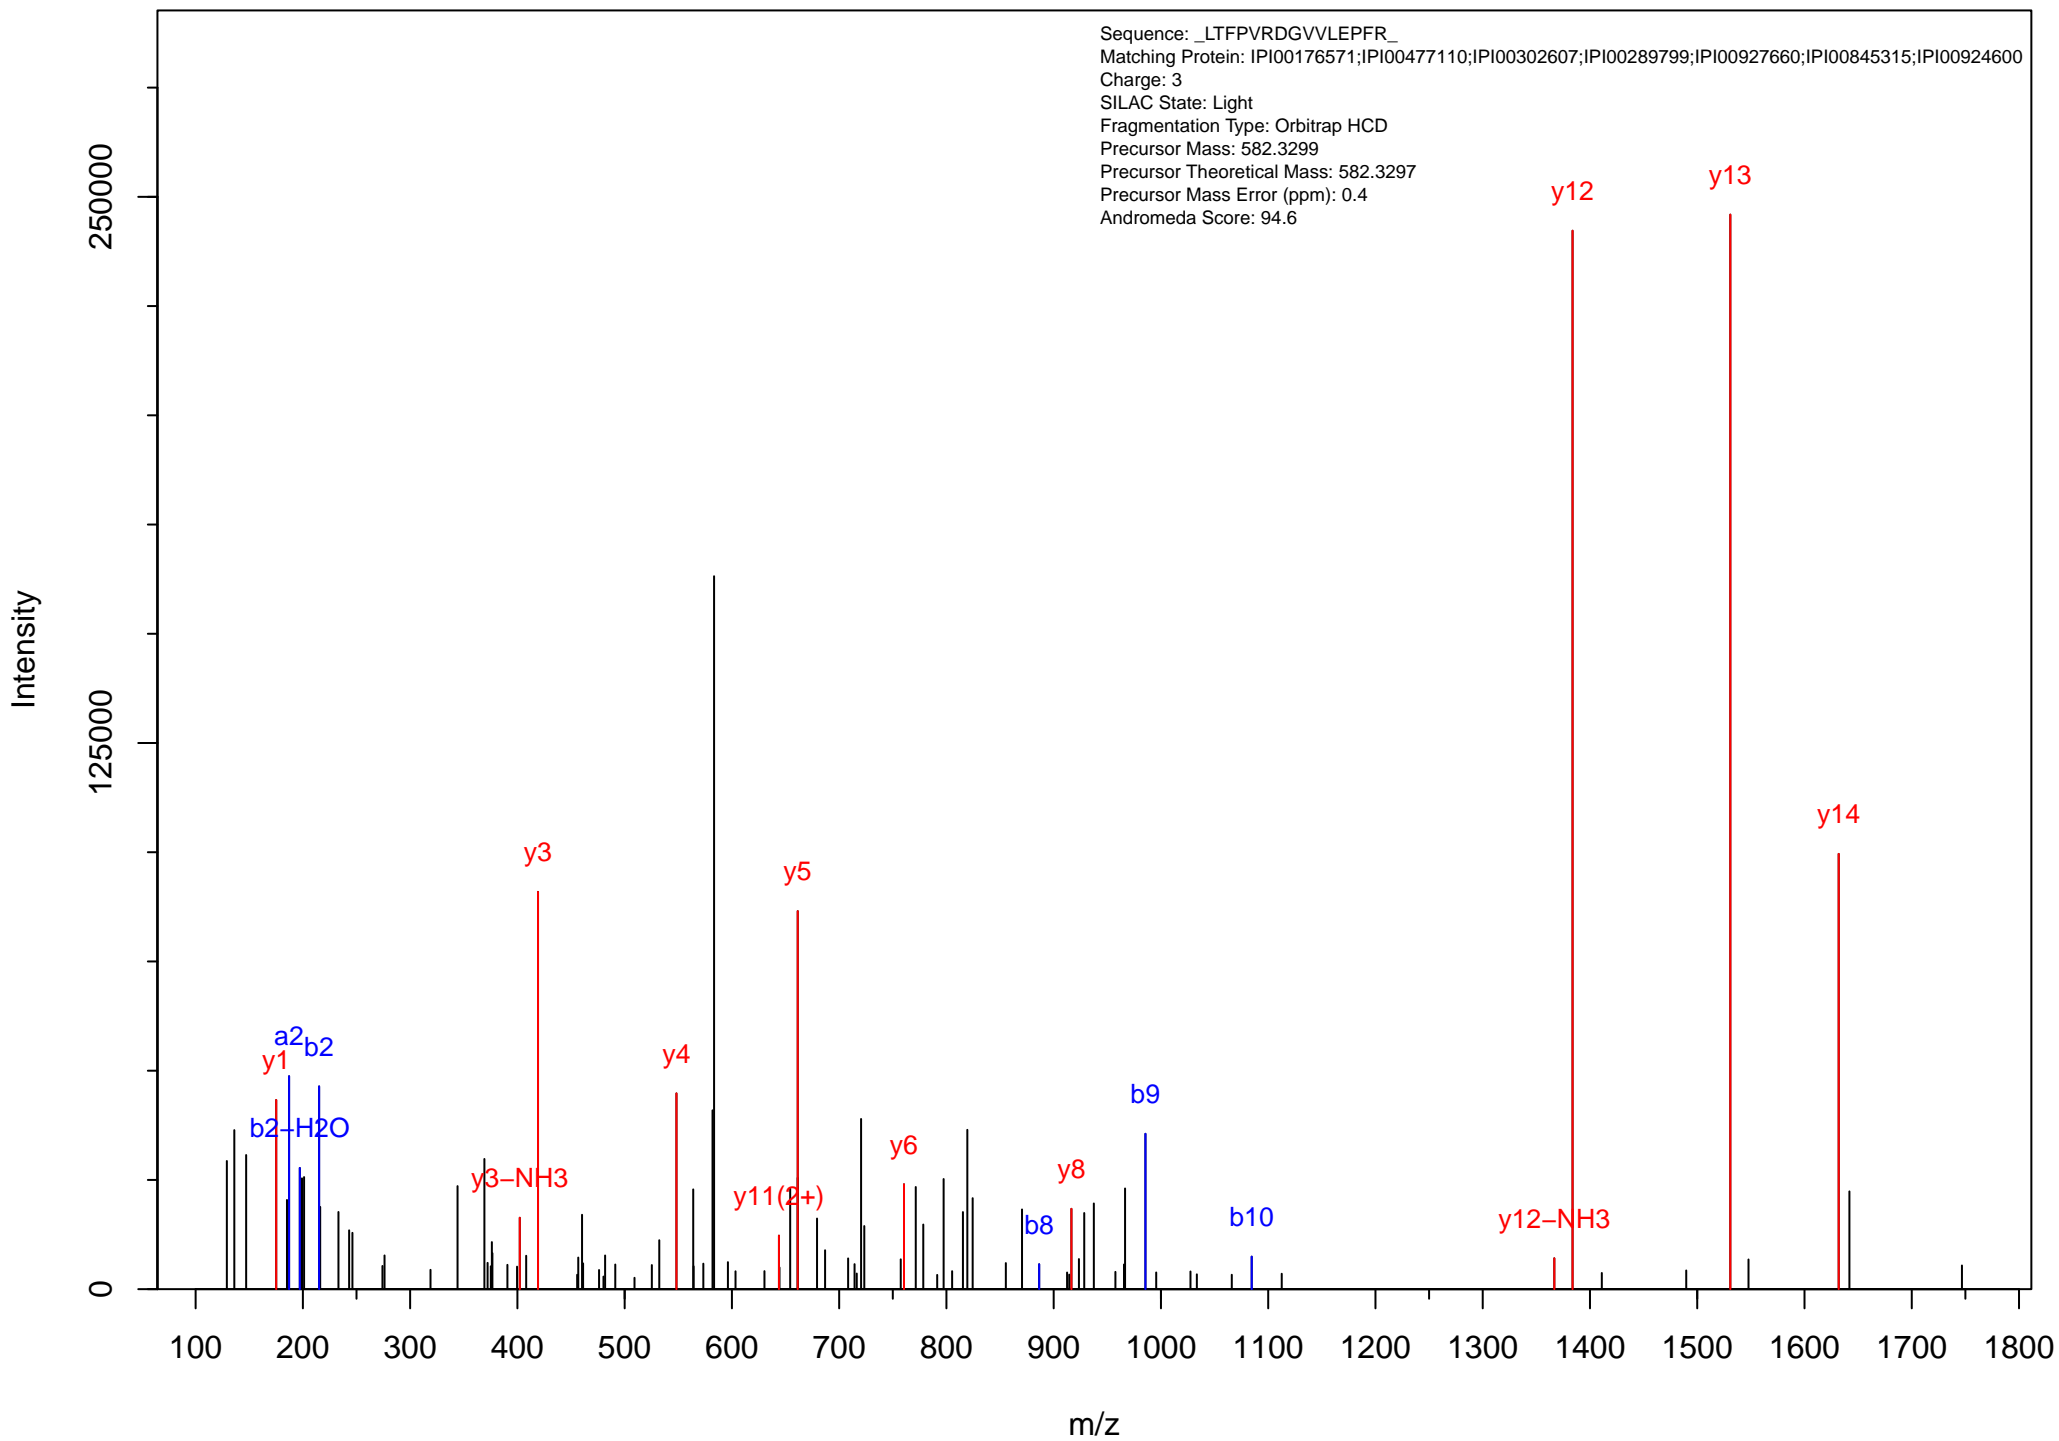

Supplement: Supplementary file 1 [file 4161244 › SupplementaryFigure3.pdf]
