# Supplementary material
Source: publisher figshare collection journal article supplement (https://acs.figshare.com/ndownloader/files/4161244)
Supplement: Supplementary file 1 [file 4161244]

Archive with 9 entries (9 files):
- Supplementary Table 1.xlsx
- Supplementary Table 2.pdf
- SupplementaryFigure1.pdf
- SupplementaryFigure2.pdf
- SupplementaryFigure3.pdf
- SupplementaryFigure4.pdf
- SupplementaryFigure5.pdf
- SupplementaryFigure6.pdf
- SupplementaryFigure7.pdf
