# Supplementary material
Source: publisher figshare collection journal article supplement (https://acs.figshare.com/ndownloader/files/4161244)
Supplement: Supplementary file 1 [file 4161244 › Supplementary Table 1.xlsx]

## Sheet: Yeast
Protein Group	Peptides	Sequence Coverage [%]
YPL231W	73	56
YNR016C	69	40
YKL182W	67	40.1
YJL130C	64	38.9
YJL080C	58	55.2
YLR106C	57	13.8
YMR229C	52	36.6
YDR127W	51	39.2
YDL171C	49	29.1
YGL206C	49	36.8
YGL173C	47	34.6
YGL195W	47	20.1
YER091C	45	72.4
YBR079C	43	49.6
YLR249W	43	58.2
YML072C	42	35.3
YOR335C	42	44.9
YDL185W	40	52.2
YGR094W	38	40.8
YKL157W	38	50.7
YMR012W	38	31.5
YMR186W	38	56.9
YBL076C	36	41.7
YDR385W;YOR133W	36	44.2
YER138C;YLR157C-B;YPL257W-B;YPR158C-D	36	27.5
YML039W;YGR027W-B	36	27.5
YOL103W-B	36	27.5
YGR204W	35	53.8
YKL210W	35	42.4
YOR198C	35	62.1
YPL160W	35	43.2
YAL005C	34	71.3
YGL009C	34	48.8
YJR109C	34	39.1
YLL026W	34	50
YPL106C	34	52.7
YPL240C	34	53.2
YPR137C-B	34	26.6
YPR158W-B;YDR316W-B;YML045W;YMR050C;YOR142W-B;YHR214C-B;YBR012W-B;YER160C;YGR161C-D	34	25.8
YBR208C	33	23.2
YGL026C	33	67
YLL024C	33	71.5
YMR031C	33	45.9
YOR027W	33	65.9
YOR168W	33	46.6
YGR061C	32	31.7
YGR264C	32	41.4
YIL078W	32	52.2
YLR304C	32	49.9
YBL047C	31	31.3
YER069W	31	50.8
YGL245W	31	44.6
YLR335W	31	53.6
YDL195W	30	30.9
YER165W	30	53.4
YGR240C	30	41
YNL247W	30	44.1
YOR326W	30	23
YBR084W	29	37.8
YGR155W	29	64.3
YJL034W	29	43.8
YKR001C	29	48.6
YOR317W	29	51.4
YDL229W	28	74.7
YDR341C	28	53.4
YEL031W	28	29.5
YGL062W	28	30.8
YJR045C	28	65.7
YNL209W	28	74.7
YPL226W	28	30
YBR218C	27	30.3
YCR012W	27	77.6
YLR044C	26	66.6
YLR259C	26	57.5
YOR063W	26	66.1
YAL035W	25	26.7
YBR121C	25	44.1
YDL126C	25	46.2
YFL018C	25	57.1
YPL061W	25	74.4
YBR086C	24	27.1
YBR118W;YPR080W	24	66.2
YBR196C	24	55.1
YCL030C	24	42.3
YCL043C	24	54.2
YCR088W	24	53.2
YER110C	24	25.9
YHR174W	24	90.6
YKL060C	24	76
YLR314C	24	55.2
YMR105C	24	46.6
YMR309C	24	30.7
YBL024W	23	38.9
YBR143C	23	57.7
YDL066W	23	60.7
YDL145C	23	22.8
YER073W	23	47.9
YGR130C	23	29.4
YHR020W	23	45.9
YJR016C	23	55.4
YJR139C	23	76
YLL018C	23	42.4
YML070W	23	52.7
YML100W	23	29.6
YMR062C	23	56.7
YMR205C	23	35.2
YOR374W	23	58
YCR053W	22	51.8
YDR037W	22	46.9
YDR074W	22	34.6
YGL008C;YPL036W	22	31
YGR254W	22	76.7
YLR058C	22	58.2
YLR197W	22	50.4
YLR441C	22	82.4
YOR323C	22	49.1
YAL038W	21	66.8
YDL103C	21	55.1
YDR502C	21	76.3
YER025W	21	56.9
YGR162W	21	30.6
YGR192C	21	83.4
YGR244C	21	51.1
YHL033C	21	77.7
YHR027C	21	22.9
YLL045C	21	77
YLR180W	21	79.6
YLR354C	21	68.1
YMR045C	21	14.9
YOL058W	21	70
YPR145W	21	52.6
YBR011C	20	78.4
YDL124W	20	93.3
YDR129C	20	47.2
YER006W	20	51
YER043C	20	47.2
YER052C	20	42.3
YFL022C	20	47.9
YHR064C	20	45.4
YHR183W	20	52.1
YJR009C	20	76.2
YKL035W	20	55.9
YKL152C	20	84.2
YLR027C	20	64.1
YLR060W	20	36.6
YOL140W	20	61.2
YOR310C	20	50.7
YOR375C	20	66.5
YPL085W	20	11.6
YPR041W	20	63.2
YPR074C	20	39.3
YBL039C	19	35.6
YBR025C	19	50.3
YBR248C	19	43.5
YDL055C	19	53.5
YDL084W	19	46.9
YFR044C	19	52.6
YGL105W	19	49.5
YGL148W	19	80.1
YGR019W	19	54.8
YGR124W	19	47.4
YJL041W	19	40.9
YJL167W	19	59.1
YKL054C	19	27.4
YLR150W	19	77.3
YML063W	19	81.6
YNL069C	19	84.3
YBR263W	18	40.6
YDR023W	18	49.6
YDR380W	18	36.7
YFR031C-A;YIL018W	18	94.1
YGL137W	18	26.4
YGL253W	18	61.1
YGR285C	18	42.7
YHR019C	18	41.2
YHR208W	18	74.8
YJL008C	18	39.8
YJL052W	18	66.3
YKL211C	18	45
YMR108W	18	35.8
YMR235C	18	49.1
YNL138W	18	39.9
YOR007C	18	52.6
YPR033C	18	35
YBL099W	17	46.6
YDR098C-A	17	53.2
YDR353W	17	69.3
YEL047C	17	51.7
YFR053C	17	51.1
YHR214C-C;YBR012W-A;YDR316W-A;YER159C-A;YGR161C-C;YMR051C;YOR142W-A;YPR158W-A;YML045W-A;YDR210C-C	17	52.5
YIL053W	17	80.8
YKL081W	17	39.8
YLR355C	17	53.2
YLR432W	17	48
YML008C	17	47.8
YNL241C	17	42.6
YOL086C	17	74.4
YBR249C	16	60
YDR172W	16	29.5
YEL071W	16	40.9
YER090W	16	41.2
YER178W	16	58.6
YGR180C	16	52.5
YHR203C;YJR145C	16	72.4
YJL153C	16	36.2
YKL127W	16	35.3
YLR028C	16	41.5
YLR153C	16	26.2
YLR256W-A	16	51.8
YMR217W	16	36.4
YNL134C	16	45.5
YNL220W	16	49
YOR184W	16	53.2
YPL091W	16	48
YDL182W	15	47.4
YDR158W	15	46.6
YDR188W	15	31.5
YDR233C	15	49.5
YER081W	15	41.8
YGL076C	15	81.6
YGL202W	15	40.2
YGL234W	15	27.7
YHR137W	15	42.3
YIL142W	15	33.6
YLR303W	15	39.2
YPL028W	15	57
YPL198W	15	81.6
YBR189W	14	81.5
YGL135W;YPL220W	14	65.4
YGR086C	14	69
YJL138C;YKR059W	14	51.4
YLR109W	14	73.9
YLR342W	14	10.6
YMR083W	14	46.1
YMR226C	14	68.2
YNL007C	14	48.6
YNL064C	14	41.6
YNL079C	14	72.9
YOR117W	14	53.9
YOR142W	14	59.9
YOR204W	14	34.8
YOR332W	14	80.7
YPR036W	14	35.6
YBR031W	13	55.2
YDL100C	13	48.9
YDL131W	13	37
YDR012W	13	55.2
YDR346C	13	27.9
YER003C	13	35
YGL123W	13	69.7
YGL147C	13	83.2
YHR216W;YAR073W	13	35
YIL041W	13	57.4
YJL177W	13	88.6
YJR121W	13	32.3
YKL150W	13	47.7
YKL180W	13	88.6
YLR029C	13	58.3
YLR075W	13	61.5
YMR116C	13	60.2
YMR146C	13	44.4
YMR315W	13	38.4
YMR318C	13	47.8
YNL067W	13	83.2
YNL098C	13	59.9
YPL004C	13	52.5
YPL081W	13	80.2
YAL003W	12	71.4
YBR181C;YPL090C	12	61
YBR286W	12	29.4
YDL022W	12	38.9
YDR050C	12	72.2
YDR155C	12	96.9
YDR226W	12	82
YER023W	12	60.8
YER120W	12	63.1
YFL039C	12	59.2
YGR234W	12	39.6
YHR179W	12	37
YJL088W	12	49.4
YKL085W	12	51.2
YML056C	12	31.1
YMR173W	12	57.9
YNL055C	12	68.6
YOL151W	12	42.7
YPL111W	12	52.9
YPR191W	12	45.9
YBL045C	11	28.9
YBR035C	11	61.8
YBR048W;YDR025W	11	67.3
YBR127C	11	25.5
YER074W;YIL069C	11	74.8
YHR010W;YDR471W	11	77.2
YIL074C	11	31.3
YJR105W	11	51.2
YLR340W	11	48.1
YMR121C	11	49.5
YNL037C	11	39.2
YNL104C	11	24.7
YNL302C	11	97.2
YOL109W	11	76.1
YOL121C	11	97.2
YOR136W	11	37.7
YPL131W	11	49.8
YPL154C	11	32.6
YBL072C;YER102W	10	47
YDR099W	10	58.6
YER177W	10	59.9
YOL139C	10	54.5
YOR369C	10	95.8
YDR418W;YEL054C	9	66.1
YDR450W;YML026C	9	79.5
YER086W	9	26.4
YHL034C	9	51.4
YJR123W	9	43.1
YLR367W;YJL190C	9	90
YNL160W	9	26.8
YOL127W	9	65.5
YOR298C-A	9	61.6
YPL239W	9	54
YEL034W	8	72.6
YGR034W	8	72.4
YHR193C	8	68.4
YLR167W;YLL039C	8	61.2
YMR046C	8	24.5
YMR242C;YOR312C	8	55.2
YNL301C;YOL120C	8	56.5
YMR241W	7	26.4
YCR031C;YJL191W	6	89.8
YDR382W	6	81.8
YLR061W	6	76.9
YNL135C	6	67.5
YOR020C	6	80.2
YPL037C	6	43.9
YIL148W;YKR094C	5	48.4
YKL117W	5	29.2
YNL015W	5	76
YOL039W	5	79.2
YPR062W	5	51.9
YJR014W	4	27.8
CON__P15636	3	14.9
YBR283C	3	10
YBL003C;YDR225W	2	32.6
YDL130W	2	47.2
YDR101C	12	30.5
YLR344W	8	72.4
YMR303C	7	23.3
YFL005W	10	59.5
YLR359W	17	42.7
YDL140C	29	20.9
YIL033C	16	44.2
YER036C	17	36.2
YPR069C	8	35.5
YDL143W	14	37.7
YDR064W	6	60.3
YGR085C;YPR102C	10	70.7
YHL015W	8	62
YDR035W	14	43.8
YDR170C	25	13.4
YPL262W	14	34
YJR104C	7	55.8
YOR270C	9	13.2
YDL081C	4	81.1
YLR333C	8	75.9
YEL060C	11	20.9
YER057C	7	78.3
YHR047C	20	29
YIL051C	7	58.6
YJL050W	25	29.9
YMR131C	7	18.4
YPR010C	12	14.2
YOR096W	16	93.2
YDR238C	20	23.5
YDR447C;YML024W	8	77.9
YFL014W	6	66.1
YKL104C	16	26.6
YLR200W	7	87.7
YNL071W	17	35.1
YBL005W-B	21	14.2
YPR163C	9	26.1
YLR429W	19	36.7
YNL096C	15	81.1
YGR037C	10	82.8
YDL078C	11	44.9
YDL007W	9	28.6
YOR230W	13	32.7
YLL050C	9	93
YML106W	12	57.5
YBR169C	18	34.1
YKL080W	11	35.7
YNL239W	15	36.3
YNR001C	13	38.2
YCL050C	12	42.4
YKL212W	15	31.8
YDR258C	23	34.4
YHR170W	9	19.5
YDL075W	7	67.3
YHL030W	23	14.5
YIR037W	9	50.3
YJR070C	10	46.2
YBR149W	7	22.4
YGR103W	21	41.2
YER031C	7	41.3
YIL133C	19	79.4
YCL057W	17	26.8
YGL055W	9	19.8
YDR497C	10	19.9
YLR406C	7	67.3
YLR270W	15	50.6
YGR185C	20	48.2
YBL091C	9	23.3
YAL012W	10	30.2
YHR108W	12	26.3
YGR181W	5	62.9
YGL103W	12	63.8
YOR120W	15	65.1
YOL111C	8	53.8
YDR033W	3	13.4
YGR027C	8	75.9
YJL109C	25	16.6
YKL172W	17	41.9
YDR091C	17	31.9
YML126C	16	38.7
YHR113W	9	25.1
YGR229C	10	26.5
YGR159C	6	17.4
YLR178C	8	50.2
YER103W	9	17.1
YOR341W	29	22.7
YGR218W	26	23.8
YOR239W	10	19.6
YLR179C	10	69.2
YDR032C	4	22.7
YDL072C	8	42.4
YLR438W	13	42.9
YDR212W	16	32
YGR087C	5	9.9
YHR018C	15	43.8
YPR183W	8	42.7
YHR107C	9	25.3
YLR264W;YOR167C	3	89.6
YDL029W	9	33.2
YBR072W	6	36.4
YHR068W	16	46.5
YJR007W	17	66.1
YMR099C	14	52.2
YLR216C	16	42.9
YGL157W	12	41.2
YBR247C	11	26.5
YPL143W	8	91.6
YOR234C	8	91.6
YKL216W	16	58
YGR116W	28	22.3
YCR093W	22	12.8
YLR449W	9	21.4
YKR048C	8	27.3
YBR244W	8	53.1
YFL045C	8	39
YGR135W	6	32.9
YML125C	8	36.5
YOR046C	14	32.2
YJR137C	18	15.8
YKL142W	13	67.6
YDR454C	8	61.5
YDR150W	34	32.2
YMR079W	12	44.4
YHR146W	14	33.3
YMR183C	5	27.5
YOR086C	24	22.7
YMR307W	7	16.3
YML128C	21	45.6
YBR106W	12	64.4
YBR109C	4	29.3
YIL076W	8	29.7
YJL014W	19	39.1
YLR244C	10	34.6
YBR078W	4	8.1
YJR148W	12	43.4
YJR077C	11	39.9
YPL145C	17	42.6
YJL020C	25	28.8
YER048C	20	54.5
YOR187W	9	30.7
YDL147W	18	42
YNL121C	25	42.8
YBR088C	12	55
YEL038W	5	31.7
YLR389C	17	18.8
YDR002W	9	45.8
YPL093W	24	42.5
YDL051W	9	29.8
YJL055W	8	49
YBR222C	16	34.1
YGL030W	7	79
YKL006W	10	84.1
YCL037C	12	34.8
YHL001W	10	84.1
YLR258W	9	16.5
YDL014W	12	42.2
YNL132W	19	24
YBR026C	12	45
YLR330W	11	21.6
YLR380W	10	32.1
YFR009W	19	28.5
YOR303W	13	34.5
YPR148C	14	39.8
YDR368W	11	43.9
YNL010W	16	60.2
YOL041C	14	38.8
YMR215W	8	17.7
YER070W	12	16.2
YOL059W	10	32.3
YBL050W	11	44.2
YMR261C	18	22.1
YHR042W	16	29.1
YPL048W	16	35.2
YGR211W	11	28
YDL137W;YDL192W	5	35.9
YNL131W	3	29.6
YNR043W	10	32.6
YBR256C	7	35.3
YBL027W;YBR084C-A	10	51.9
YML073C	13	76.7
YDR120C	15	33.5
YDR190C	9	26.8
YDL097C	14	38
YAL016W	12	25.7
YPL078C	10	44.7
YBL087C;YER117W	5	43.1
YIL109C	12	14.3
YER080W	17	31.1
YNL287W	14	20.5
YHL011C	8	37.5
YMR120C	11	26
YPL032C	8	11.9
YNL061W	12	24.9
YML085C	7	28
YLR248W	16	26.2
YGL031C	11	57.4
YOL097C	15	34.7
YNL244C	4	50.9
YLR420W	11	37.6
YGR148C	11	57.4
YNR050C	13	39.2
YCL035C	5	65.5
YLL021W	15	15.3
YMR038C	8	32.5
YDR060W	19	21.5
YOR165W	12	19.1
YGR118W;YPR132W	9	64.1
YEL055C	18	20.5
YLR410W	21	22.8
YMR096W	11	49.8
YCL040W	15	38.2
YDL160C	13	33
YGR209C	9	82.7
YGL048C	15	46.4
YMR297W	8	21.4
YLR175W	11	29.4
YDL125C	6	56.3
YLR448W	14	80.7
YBL015W	12	26.6
YJR065C	8	26.1
YLR195C	9	24
YCR084C	9	14
YIL075C	24	27.9
YJL123C	15	34.9
YNL208W	1	8
YER136W	11	31
YEL002C	8	19.3
YDL225W	9	22.5
YGR157W	13	15.1
YPL260W	14	32.7
YNL178W	10	61.7
YKR066C	10	27.1
YLR257W	10	44.9
YIL125W	20	26.6
YIL115C	13	11.2
YDR168W	18	40.5
YBL058W	12	37.6
YOL038W	7	35.4
YHR128W	5	40.7
YOR151C	19	20.5
YDR508C	6	11.6
YBR009C;YNL030W	5	65
YJR069C	7	33
YDL083C;YMR143W	8	64.3
YOR361C	20	29.8
YFR052W	16	70.1
YIL138C	9	56.5
YHR063C	8	25.6
YKR057W;YJL136C	5	94.3
YBR162C	3	11.9
YAL023C	6	11.7
YHR008C	8	45.1
YPL237W	11	44.6
YGL037C	7	36.6
YKL181W	7	23.2
YOL027C	16	29.7
YER083C	9	35.1
YNL248C	9	29.4
YNR021W	10	29.7
YEL037C	7	18.8
YOR285W	5	54.7
YGR167W	12	48.9
YLR043C	8	78.6
YDR298C	10	54.2
YNL175C	20	56.3
YIL052C	5	53.7
YIL063C	11	43.4
YLR325C	7	73.1
YKR046C	11	50.2
YDL168W	13	42.5
YBR053C	11	41.1
YEL046C	6	21.7
YDR214W	11	38.9
YBR056W	14	29.9
YDL132W	13	18
YJL026W	11	30.1
YMR049C	13	21.3
YLR048W	4	31.3
YLR300W	2	9.2
YML028W	6	27.6
YBL017C	18	14.2
YKL033W-A	8	33.9
YCL028W	3	14.1
YGR214W	3	31.3
YGL011C	8	35.7
YGL040C	5	18.1
YDL174C	12	26.7
YPR118W	13	49.4
YAR007C	13	24.3
YPR035W	9	26.5
YJL111W	12	27.3
YDL064W	6	49
YOR243C	12	24.7
YIR006C	15	12
YBR046C	14	47.6
YER156C	10	36.4
YDL136W;YDL191W	10	69.2
YNL243W	16	22
YDL236W	10	39.4
YKL195W	11	35.5
YLR209C	4	20.9
YNL014W	9	10.5
YOL064C	13	42
YDR189W	16	29.9
YHR200W	3	22
YDL135C	8	58.4
YML124C	4	10.6
YLR351C	6	26.1
YDL082W	9	55.8
YMR142C	10	62.3
YDR234W	15	26
YKL103C	13	24.9
YLR447C	3	13.6
YNL307C	12	46.4
YBR191W	9	66.2
YCL009C	5	23.9
YJR094W-A;YPR043W	5	56.5
YOR095C	10	48.1
YNL274C	8	38.3
YNL312W	7	37.7
YPL012W	15	14.5
YKR035W-A	6	35.3
YBR039W	14	50.5
YHR070W	8	17.4
YHR021C;YKL156W	3	50
YFL038C	8	38.8
YNR017W	5	25.2
YDL121C	5	28.9
YLR372W	4	16.5
YFR006W	8	17.4
YGR032W	9	6.5
YDR165W	14	39.4
YLR100W	9	31.7
YIL043C	12	41.9
YHR089C	4	22.4
YDR299W	8	21.3
YFR011C	7	45.9
YER062C	13	59.2
YPL079W	9	66.2
YCR030C	10	15.5
YPL094C	6	29.6
YLR196W	11	28.5
YNL149C	5	48.8
YBR126C	9	23.2
YML048W	11	33.3
YLR133W	9	18.9
YLR301W	6	34
YGR253C	7	32.7
YOL143C	4	33.7
YML010W	20	24.6
YKL009W	7	34.3
YGL078C	14	32.5
YER056C-A	5	53.7
YIL116W	6	16.6
YBL068W	9	31.8
YKL192C	4	41.6
YOR122C	3	37.3
YLL048C	24	17.5
YER122C	12	35.5
YOL123W	10	24.3
YDR177W	7	52.6
YBL007C	20	18.3
YAR015W	11	41.5
YML004C	10	34.7
YNL173C	13	51.4
YOR265W	7	73.6
YKL143W	6	15.1
YDR513W	11	59.4
YOR272W	11	33.5
YOR254C	12	23.2
YDL052C	7	28.7
YKR095W	33	21.3
YBL030C	15	37.1
YMR092C	15	25.4
YDR071C	8	47.6
YBL092W	10	68.5
YJL173C	2	29.5
YBR015C	16	29.1
YLR134W	3	11.2
YPL271W	2	56.5
YLL040C	27	9.9
YMR170C;YMR169C	15	37.4
YPL225W	7	45.2
YJR125C	9	25.5
YOL005C	6	55.8
YLR324W	8	23.1
YOL061W	8	24
YJR060W	3	12.3
YBR229C	4	6.6
YDL040C	25	30.7
YML092C	6	29.2
YOR157C	3	19.5
YOR232W	6	33.3
YOR259C	10	30
YER099C	5	19.2
YOR209C	16	44.8
YBR234C	5	17.2
YBR177C	8	21.3
YCR004C	6	32.4
YOL049W	13	29.3
YJR064W	20	36.3
YOR261C	12	30.8
YGR054W	16	25.5
YOL022C	12	31.6
YNL281W	8	47.7
YDR483W	13	31.7
YGR128C	9	17.8
YLR384C	17	13.9
YGR008C	4	50
YLL001W	14	22.7
YKR082W	13	14.4
YDR518W	5	12.2
YIR036C	8	40.3
YGL043W	14	52.1
YMR314W	6	34.6
YDL235C	5	35.3
YDR378C	2	43
YGR193C	13	31
YKL067W	6	31.4
YDL058W	16	10.4
YLR450W	7	8.1
YLR388W	4	94.6
YOR206W	20	26.1
YPL210C	10	17.2
YDR292C	11	22.7
YPR004C	8	31.1
YMR246W	14	23.9
YJR117W	8	23
YFR051C	8	16.7
YCR028C-A	5	56.3
YBL036C	8	33.5
YGL120C	14	21.5
YBL002W;YDR224C	5	45.8
YJL060W	7	17.8
YHL021C	8	22.2
YOR108W	10	18.4
YIL094C	11	36.1
YER021W	10	22.4
YDR395W	11	12.2
YPR091C	11	17.4
YPL232W	6	28.3
YDR304C	7	39.1
YNL308C	11	20.6
YPL249C	7	12
YFR024C-A	10	30.5
YOR251C	9	32.6
YNL044W	4	30.1
YGR282C	6	21.1
YPR108W	13	32.4
YPL218W	5	36.8
YKL056C	8	34.7
YHR190W	10	24.1
YDL226C	11	49.4
YER042W	10	64.7
YEL042W	6	15.3
YMR272C	7	23.7
YML086C	9	18.1
YJL172W	9	17.7
YOR051C	10	24.8
YHR037W	12	24.9
YPR028W	4	29.4
YIR035C	6	32.3
YJL183W	6	16.1
YHR049W	8	38.7
YLR347C	9	14.5
YGL054C	1	10.9
YDR427W	12	29.8
YEL020C	1	2.5
YPR112C	14	20.9
YHR039C-A	7	50
YDL031W	12	13.8
YFL034C-A	2	23.8
YBL032W	10	32
YDR232W	9	22.8
YBR080C	14	22.2
YDR496C	16	23.6
YLL008W	16	24.7
YOR356W	9	18.4
YKL007W	6	29.9
YPL126W	12	16.1
YMR196W	14	14.8
YPR143W	8	36
YBR159W	10	28
YHR007C	8	17.9
YLR192C	9	40.4
YOR016C	6	28.5
YOR126C	8	36.6
YPL273W;YMR321C	7	27.1
YGR136W	4	19.1
YGL200C	3	29.1
YBR221C	5	19.1
YBR101C	9	42.1
YDR148C	4	9.9
YPR127W	7	27.8
YMR145C	15	25.9
YKR016W	6	14.8
YPL235W	10	28.5
YML069W	6	14.3
YJL069C	5	12.1
YPL217C	15	13.5
YEL013W	9	20.2
YJL001W	8	40
YLR208W	8	33
YKL029C	11	17.5
YHR163W	7	40.6
YHR104W	15	42.5
YHR052W	12	33.5
YPR181C	8	14.2
YGL111W	8	23.1
YMR208W	6	17.4
YPL063W	14	33.2
YKL213C	13	22.1
YDL061C	4	94.6
YDR381W	10	45.1
YGL106W	8	51
YLR276C	16	30.6
YPL086C	5	14.2
YGR261C	9	13.6
YFL037W	3	7.2
YML074C	10	24.1
YPR189W	9	7.6
YDL198C	11	41.3
YDR098C	4	16.1
YLR008C	3	18.5
YLR025W	5	24.2
YGL189C	5	56.3
YML078W	8	47.3
YNL292W	5	17.1
YDR358W	9	19.2
YFR004W	7	26.1
YGL207W	13	13
YBR082C	3	26.4
YOR089C	6	39.5
YJL186W	9	17.1
YEL024W	2	14
YMR308C	8	11.3
YMR230W;YOR293W	5	39
YHR039C	13	22.5
YBR006W	7	19.3
YKL196C	10	51
YJR010W	4	11.4
YBR252W	3	31.3
YLR206W	6	13.2
YLR003C	4	17.9
YPL117C	8	30.9
YMR027W	14	31.5
YCL025C	5	9.3
YNL045W	9	13.9
YFL048C	13	31.2
YBL022C	19	21.3
YOR101W	6	29.4
YGL167C	12	16.6
YDL213C	4	28.9
YMR276W	5	16.9
YBL069W	6	17
YER007C-A	9	58.6
YER049W	13	20
YOR327C	3	40.9
YLL022C	4	13.5
YGR083C	8	16.4
YPL129W	8	34.4
YKR014C	8	45.7
YJL145W	10	34
YIL062C	2	20.1
YGL244W	7	14.5
YOR362C	5	19.8
YJL117W	4	15.1
YNL182C	8	16.8
YGR207C	10	41.4
YMR290C	11	28.3
YLR287C-A;YOR182C	3	58.7
YMR071C	2	15.6
YJR143C	10	10.9
YOR185C	9	35.5
YLR172C	5	19
YDR361C	5	22.6
R0020C	7	23.6
YKL024C	8	53.9
YCL054W	7	8.9
YIL034C	4	17.1
YBR145W	7	22.5
YDR044W	4	12.5
YJL039C	8	5.8
YJL104W	4	34.2
YGR284C	2	9
YPR160W	10	15.7
YGL020C	6	24.3
YNL181W	7	20.6
YNL189W	5	10.5
YDR055W	4	11.3
YKR084C	4	9.5
YLL034C	10	13.1
YER012W	5	31.3
YDR293C	12	13.8
YKL073W	12	15.6
YDR453C	4	27
YBR155W	12	31.7
YAL007C	6	30.7
YPR129W	6	22.1
YKL010C	8	5.9
YFR010W	10	23.8
YKR042W	4	17
YER055C	11	39.7
YPL169C	5	13
YOR281C	6	22.7
YPL112C	5	16.5
YPL195W	9	12.3
YPR016C	1	6.9
YOR160W	2	2.9
YKL040C	5	25
YOR021C	11	61.5
YLR295C	2	22.6
YDL053C	6	47.6
YMR214W	4	15.6
YDR354W	8	26.1
YOR042W	8	23.8
YLR113W	7	16.6
YDR365C	11	23.4
YNR035C	5	24.3
YAL060W	7	21.7
YLR129W	13	15.2
YMR203W	4	18.3
YNL154C	6	13.7
YDR135C	10	6.7
YPL249C-A	6	44
YOR103C	2	20
YHR029C	7	26.5
YIR012W	5	11.8
YMR072W	9	52.5
YCR051W	2	12.2
YOL040C	5	45.1
YCR009C	10	36.2
YNL157W	6	51.8
YKR071C	4	16.7
YAR002C-A	7	35.2
YHR074W	8	12.7
YJL076W	11	10.7
YGL238W	10	13.5
YKR081C	7	19.2
YMR194W	6	44
YLR293C	9	35.2
YDR152W	8	29.1
YDL112W	15	12
YDR321W	9	28.6
YNR019W	2	3.3
YGL221C	5	19.4
YHR098C	12	17.2
YOL070C	5	14.6
YLR118C	2	15
YML022W	6	26.7
YPL212C	13	30.1
YNL112W	8	18.9
YIR004W	7	18.8
YPR110C	8	31.9
YPL009C	14	16.7
YBR085C-A	4	49.4
YPL263C	2	4
YIL118W	5	32
YHR013C	6	32.4
YEL058W	8	15.6
YLL023C	5	18.3
YBR142W	7	10.3
YMR125W	9	10
YOR109W	7	7.9
YIL022W	9	24.8
YGL065C	4	11.1
YOR091W	8	25.8
YJL171C	2	8.6
YBR166C	6	14.4
YFR016C	14	17.8
YJL200C	11	15.5
YKL151C	7	21.1
YGR123C	8	15.4
YCL059C	14	50.6
YJR068W	4	13.9
YPR133C	8	25.4
YHR025W	2	6.2
YMR295C	1	9.6
YGR208W	6	21.7
YGR186W	5	9
YNL180C	5	18.1
YBR058C	4	7.3
YCR005C	10	27
YFL028C	7	27
YBL100W-B;YDR210W-B;YFL002W-A;YGR161W-B;YLR410W-B;YOR192C-B;YOR343W-B;YCL019W;YDR034C-D	11	6.4
YBR034C	9	26.4
YER126C	4	21.1
YAL042W	4	11.1
YLR186W	8	43.7
YLR268W	2	14
YOR294W	5	31.5
YBR261C	5	25.4
YFR037C	6	14.2
YKL148C	9	18.6
YDL190C	7	8.6
YCR077C	9	18.1
YMR250W	6	14.4
YER131W	5	56.3
YJL122W	5	38.9
YLR093C	3	14.6
YCL045C	12	16.8
YMR197C	2	12
YML035C	12	15.7
YGR232W	8	36.4
YPR154W	3	18.6
YOR175C	6	11
YMR260C	5	34.6
YKL204W	3	7.6
YML012W	1	7.6
YKL001C	5	32.2
YGL184C	6	19.6
YER034W	1	9.7
YCR047C	3	15.3
R0040C	4	16.6
YDR001C	6	8.3
YNR034W	5	24.3
YFR033C	2	19
YOR171C	7	13.3
YLR181C	5	21.8
YML079W	5	24.9
YDL095W	5	8.2
YHL039W	5	8.5
YOR153W	6	7.3
YML130C	7	13.5
YMR109W	14	13
YNL333W;YFL059W	3	19.5
YLR378C	7	16.7
YJR088C	8	27.7
YKL191W	5	10.5
YIR038C	9	43.2
YIL038C	8	12.2
YNL166C	8	27.9
YKL014C	15	9.1
YHR069C	3	15.6
YDL153C	6	13.4
YMR090W	6	29.5
YKL094W	6	22
YER087C-B	3	30.5
YNL231C	11	34.2
YER002W	5	20.8
YOR176W	6	21.6
YOR112W	6	9.2
YMR076C	9	8.5
YDL148C	10	15.1
YNL118C	12	13.1
YDR429C	4	23
YAL049C	5	22.4
YBR052C	8	47.6
YGL092W	10	8.5
YBR092C;YBR093C	6	13.9
YDR116C	2	9.1
YAL036C	4	13.6
YDR171W	7	23.5
YJR103W	6	11.9
YPL084W	13	16.7
YGL228W	14	26
YER004W	7	38.1
YGR231C	7	27.4
YOR354C	5	10.1
YNR053C	5	12.3
YNL141W	5	16.4
YGR200C	9	12.9
YBL064C	7	30.3
YAR002W	11	27.5
YDL212W	1	7.1
YOL124C	4	9.7
YKL082C	2	5.1
YBL056W	5	14.3
YBR112C	8	13
YOL077C	4	18.6
YPR063C	3	20
YKL006C-A	2	22.7
YHR043C;YHR044C	3	15.4
YKL126W	9	15.4
YMR311C	7	35.4
YDL161W	5	14.5
YDL116W	5	7.7
YDL060W	9	11.8
YGL099W	10	15.9
YLR045C	3	4.4
YBL004W	10	4.6
YCR002C	5	18.3
YKL068W	5	6.9
YNR018W	4	23.7
YER151C	9	11.6
YDR399W	5	25.8
YPR133W-A	2	28
YGL049C	12	15.6
YFR030W	7	9.1
YLR409C	4	5.5
YKL179C	10	15.6
YNL123W	8	8.7
YPR187W	2	20.6
YJL010C	12	22.8
YLR222C	9	15.3
YER125W	6	10.5
YIL137C	11	12.4
YOR124C	16	14.1
YDR211W	9	15.6
YLR056W	4	12.9
YJR144W	8	38.7
YDR251W	7	11.4
YIR034C	5	18
YJR017C	6	40
YGR184C	12	6.9
YGL187C	5	46.5
YDR036C	3	5.8
YER175C	10	29.4
YDR153C	6	18
YER063W	7	34.9
YPL211W	5	34.8
YDL215C	10	10.3
YNL313C	8	10
YJL121C	3	12.6
YDR062W	8	17.1
YGR173W	7	22.6
YDR457W	17	4.7
YAL030W	3	43.6
YML075C	6	7.4
YBR160W	4	21.1
YJR051W	7	19.8
YDL237W	6	18.7
YDR272W	6	23
YJR002W	9	15.7
YGR111W	3	8.2
YEL022W	13	9
YDL010W	4	18.6
YER030W	3	14.4
YER082C	8	15.9
YBR130C	5	14.1
YCR016W	9	32.8
YPR180W	2	6.9
YGL097W	5	11.2
YKL140W	5	11.3
YCL033C	2	12.5
YGR132C	9	39
YIL155C	9	15.4
YMR278W	8	15.1
YGR169C-A	2	32.6
CON__P04264	9	17.2
YDR394W	4	14.7
YMR149W	3	13.6
YGR267C	7	39.9
YCR083W	5	47.2
YIL021W	1	6.6
YFL017C	4	28.3
YJL217W	4	21.2
YBL041W	5	21.2
YJL068C	8	34.1
YKR009C	11	12.9
YBR230C	3	35.8
YGR183C	2	30.3
YFL007W	13	6.9
YER089C	5	15.9
YDR388W	10	23
YOR276W	2	14.9
YDR519W	2	17.8
YDR432W	4	9.7
YJL012C	7	9.4
YPL207W	5	6.3
YKL145W	5	12.8
YNL001W	5	16.6
YPR128C	6	21.3
YNL163C	11	11.4
YKL129C	17	15.7
YLL041C	3	14.7
YGL115W	4	11.8
YKL025C	4	6.5
YPR073C	2	20.5
YER019W	3	7.8
YPL146C	4	10.8
YGL255W	5	16
YIL108W	4	7.3
YML001W	7	31.7
YCL034W	2	9
YNL075W	2	7.6
YDR089W	3	5.3
YPL031C	5	24.3
CON__P35908;CON__Q7Z794;CON__Q6IFZ6;CON__Q3TTY5;CON__Q01546;CON__P12035;CON__Q5XQN5;CON__P13647;CON__Q922U2;CON__P02538;CON__P04259;CON__P48668;CON__P50446;CON__Q8BGZ7;CON__O95678;CON__Q5XKE5;CON__Q8VED5;CON__Q9R0H5;CON__Q9H552;CON__P05787	4	6.2
YEL011W	8	13.9
YML034W	4	6.5
YOR057W	7	19.2
YNL153C	7	49.6
YPR088C	8	14.4
YGL027C	10	13.9
YNL251C	4	9.4
YHL031C	3	21.5
YDL110C	2	22.7
YDR434W	4	9.6
YPL243W	9	15.7
YBR164C	3	19.7
YMR296C	5	11.8
YDR261C	2	4.8
YER168C	5	10.4
YMR074C	6	41.4
YHR196W	4	5.9
YJR072C	6	15.1
YHR087W	3	28.8
YNL016W	4	11.9
YGL190C	4	9.7
YOL098C	7	7.3
YCL057C-A	3	35.1
YOR207C	6	6.2
YOL016C	8	17.2
YAL054C	10	15.1
YIL070C	3	14.3
YGR001C	4	20.2
YGR005C	7	17.8
YGR119C	7	13.5
YGR055W	3	6.6
YKL206C	2	8.2
YMR237W	9	13.7
YPL228W	6	14.4
YJL189W	1	43.1
YDR430C	7	7.4
YBL026W	3	32.6
YOL052C	5	15.2
YMR067C	3	7.5
YJL115W	3	12.9
YLR262C-A	5	51.6
YDR507C	8	8.6
YDR300C	9	28.5
YCR086W	1	7.4
YDR487C	2	11.5
YGL153W	6	20.5
YML055W	4	25.3
YJR076C	6	17.8
YHR005C-A	2	25.8
YLR074C	2	16.3
YCL017C	4	10.1
YGR078C	5	30.2
YBR041W	5	6.4
YNL290W	4	15
YBR214W	3	7.2
YMR165C	5	7
YGR245C	9	13.4
YOL021C	8	10
YGL112C	1	3.3
YJR025C	5	28.2
YOL057W	8	14.5
YLR225C	4	9.1
YDL208W	4	31.4
YMR178W	5	26.6
YLR262C	3	18.6
YML057W	7	11.8
YDL141W	3	5.2
YGL087C	3	24.1
YFR015C	3	5.1
YKR068C	1	8.3
YDR007W	2	8.9
YJR073C	2	16.5
YNR046W	3	28.1
YHR133C	3	12
YDR119W	2	3.9
YHR158C	14	16.6
YGR210C	7	20.7
YDR097C	11	9.5
YGR090W	9	7.8
YKL165C	2	2.8
YJL184W	1	11.4
YPL050C	4	9.4
YLR286C	4	8.4
YLR398C	5	5
YDR141C	8	6.1
YOR164C	8	23.4
YHR009C	7	14.1
YNL256W	8	11.2
YDR328C	5	25.8
YDL065C	7	21.6
YJR074W	2	11.5
YML103C	12	7.6
YLR421C	2	14.7
YAL029C	8	5.7
YJL178C	5	22.1
YOR260W	9	15.7
YIR026C	6	20.6
YGR175C	2	5.4
YKR067W	7	11.8
YDR068W	5	19
YKL091C	4	15.5
YER019C-A	1	22.7
YGL196W	6	16.1
YNL087W	11	10.7
YIL145C	5	14.9
YCR057C	4	5
YNL084C	8	25.5
YGL231C	2	12.6
YFR014C	8	21.5
YIL065C	4	26.5
CON__P35527	4	10.4
YNL002C	5	16.5
YOR286W	4	36.9
YGL156W	8	8.4
YOL145C	12	10.9
YBL079W	7	5.9
YMR039C	3	14
YDL099W	2	6.5
YNR038W	6	9.4
YJL033W	11	17.4
YLR017W	6	24.3
YOL076W	7	9.7
YIL027C	3	24.1
YBR154C	4	24.7
YHR141C;YNL162W	6	37.7
YHR012W	3	14.5
YPR173C	5	12.1
YMR220W	6	15.3
YLR026C	3	10.3
YKL005C	2	3.5
YML120C	9	22.6
YMR202W	2	8.1
YGR095C	2	14.3
YDR294C	8	15.8
YFR002W	7	8.7
YKL008C	1	3.1
YML129C	1	14.3
YOR074C	6	25
YLR435W	4	26.3
YKL193C	9	24.3
YPL190C	5	9
YDL130W-A	2	29.1
YIL091C	6	9.8
YGL100W	2	7.2
YDR296W	3	17.3
YMR251W-A	1	22
YER071C	1	10.3
YPL170W	3	30.9
YJR099W	2	12.7
YHR197W	7	11.7
YIL103W	2	7.5
YOR241W	4	8.9
YBR029C	7	14.2
YAL059W	6	36.3
YFL004W	8	8.9
YPL234C	1	11
YLR386W	3	3.9
YIL083C	7	21.4
YMR110C	7	13
YLR215C	2	7.2
YML093W	6	9.1
YOR099W	9	22.9
YPR103W	4	16.4
YOR352W	4	14.9
YOR283W	3	13.9
YDL101C	6	12.3
YLR066W	2	16.3
YBR077C	2	14.2
YPR060C	7	31.2
YNL207W	3	6.8
YBR205W	9	20.5
YKL214C	3	21.7
YHR016C	6	14.3
YHR072W-A	6	82.8
YLR418C	4	13.2
YEL032W	4	4.8
YER146W	1	14
YKR003W	5	12.3
YKL065C	4	18.9
YOR061W	8	24.5
YHR135C	4	8.7
YBR016W	2	24.2
YNL197C	4	6.4
YBR059C	3	3
YNR003C	5	18
YHR106W	4	11.1
YOR321W	4	6.6
YML115C	3	6.7
YBR171W	5	24.3
YJL154C	3	3.8
YPL059W	4	43.3
YER072W	3	17.8
YKL027W	5	13.4
YDR194C	8	13.1
YLR038C	3	36.1
YLR290C	6	25.6
YDL074C	3	4.6
YOL090W	9	9.6
YKR043C	2	8.5
YHR117W	7	13.3
YML117W	4	4.2
YER143W	5	14.3
YDR122W	2	3.2
YOL012C	1	17.9
YHL017W	1	3.4
YDR174W	2	10.6
YDL201W	6	24.8
YCL014W	7	4.6
YKR074W	5	32.3
YGL039W	6	20.7
YIL136W	5	13.7
YBR111C	5	21.6
YMR259C	7	5
YKL130C	3	15
YLR185W	5	50
YOR197W	4	15
YDL046W	3	16.8
YCL031C	3	10.1
YIL020C	8	28.7
YMR305C	5	13.4
YNL200C	5	22
YJL164C	4	12.8
YJR042W	5	7.3
YBR049C	1	1.6
YIL106W	2	11.1
YOR215C	6	31.4
YDR047W	4	11.6
YDR320C	4	9.4
YOR271C	3	11
YHR127W	1	8.2
YGL012W	5	9.9
YDL019C	9	9.2
YDR347W	3	12.1
YGR279C	4	10.4
YLR439W	1	4.1
YHR001W	4	11.9
YML036W	3	15.5
YEL003W	6	47.7
YOR340C	5	15.3
YJL207C	4	2.5
YJR134C	6	9.5
YGL210W	5	32.9
YDR527W	7	18.9
YOR370C	6	10.9
YPL030W	4	9.5
YJL087C	6	7.5
YJL005W	4	2.8
YPR029C	8	8.7
YNL113W	3	21.1
YDR087C	7	23.4
YLR356W	3	16.2
YPR165W	4	24.4
YDR335W	8	7.1
YNL024C-A	1	13.9
YKR092C	4	12.6
YOL004W	7	4.9
YDL178W	6	11.5
YMR304W	7	5.6
YER112W	4	24.1
YFL023W	3	5.3
YNR013C	3	3.4
YCR017C	1	1
YGL125W	7	11.5
YPL274W	3	6.6
YDR063W	3	21.5
YER114C	4	5
YDR449C	6	13.4
YOR085W	3	7.7
YKR025W	3	14.5
YNR051C	3	8
YDR324C	5	7.9
YMR128W	14	12.3
YIR003W	9	19.7
YNL252C	4	16.4
YEL017W	5	20.8
YJR133W	1	7.2
YKL057C	4	4.1
YMR153W	4	9.3
YNL168C	4	18.1
YGR080W	6	21.4
YLR309C	7	7.7
YLR063W	2	7.4
YLR319C	5	8.4
YDR516C	3	7.4
YER145C	4	8.9
YPL125W	6	5.6
YDR363W-A	2	21.3
YDR086C	1	22.5
YLR203C	4	10.8
YDR477W	8	12.8
YKL154W	4	20.5
YNL139C	4	2.9
YBR094W	6	8.5
YOR056C	5	11.8
YKL120W	6	22.5
YHR143W-A	4	80
YDR161W	3	9.6
YKL197C	2	2.2
YNL090W	3	25.5
YBR096W	2	8.3
YGR187C	5	10.9
YJL036W	4	11.1
YLR433C	2	3.6
YMR189W	7	10.6
YKL013C	1	7
YOR311C	3	12.8
YJR096W	4	14.5
YPL135W	2	17
YCR054C	4	7.3
YOL088C	6	25.3
YOR262W	3	9.5
YNL297C	5	4.4
YGR145W	9	15.4
YGL001C	5	16.6
YNL271C	2	1.6
YLR350W	1	12.5
YGR235C	3	17.6
YLR454W	8	2.9
YPR124W	4	10.6
YHL007C	6	7.8
YKL110C	5	16
YJR135W-A	2	32.2
YML071C	3	6.8
YOR336W	3	2.5
YDR510W	2	23.8
YOR116C	6	4.7
YGR152C	4	16.5
YOR098C	6	5.6
YGR189C	6	12
YNR026C	3	10.4
YGR125W	3	3.9
YDR505C	2	2.9
YEL056W	3	8.5
YIR022W	3	16.8
YBR151W	6	21.2
YLR078C	1	4.9
YJR063W	2	19.2
YGR082W	2	13.7
YOL126C	3	8.8
YDR280W	3	12.5
YGR178C	8	13.2
YDR011W	6	4.2
YLR211C	1	5.8
YBL075C	5	7.9
YHR201C	7	15.1
YER166W;YDR093W	4	2.9
YGL068W	7	25.3
YLR250W	3	12.4
YJL066C	2	11.9
YKL016C	6	33.3
YPR169W	4	9.3
YOR014W	5	8.5
YDL219W	3	19.3
YNL130C	1	3.3
YMR139W	5	16.8
YER044C	1	8.1
YOR043W	3	7.2
YGL082W	3	6.8
YDR117C	3	7.4
YBR003W	3	7.2
YPL015C	2	7.3
YJL002C	3	6.3
YDL230W	3	10.1
YIL154C	1	4.9
YML094W	3	20.2
YMR129W	4	3.7
YGL107C	6	12.1
YNL193W	2	3.9
YOR224C	2	11
YDR533C	2	9.3
YBR069C	4	6.8
YLL013C	4	5.2
YHR088W	1	6.4
YER094C	1	8.3
YDR178W	1	7.2
YHR024C	5	11.8
YDR342C;YDR343C	2	3.9
YEL020W-A	1	25.3
YER016W	1	4.7
YNL070W	1	21.7
YMR104C	4	6.4
YHR114W	5	8.8
YLR287C	5	14.6
YOL147C	3	14.4
YDL128W	1	4.9
YML017W	7	13.8
YJR091C	3	4
YDL166C	3	16.2
YPL266W	6	18.9
YER141W	4	8.6
YEL015W	4	9.8
YOR069W	6	9.6
YDR061W	2	4.5
YOR173W	3	9.6
YPR002W	5	11.2
YKL096W	3	14.6
YLR291C	5	11.5
YKL100C	3	4.1
YLL010C	3	10.3
YBR017C	5	5.8
YLR088W	1	3.3
YKL074C	1	2.3
YPL010W	3	20.6
YDR500C	5	48.9
YAL017W	2	1.6
YKL063C	2	15
YKR002W	5	10
YMR300C	7	14.1
YHR028C	3	4.2
YNL108C	5	21.9
YPR156C	4	6.1
YFR025C	4	11.9
YBR087W	3	11
YBR139W	4	8.1
YDR476C	2	12.9
YDR166C	5	6.2
YHR132W-A	2	21.4
YPL246C	2	8
YOR195W	8	11.1
YOR253W	2	16.5
YKR013W	2	8.2
YPR172W	5	31.5
YJR080C	3	8.6
YDL188C	1	4.8
YCR046C	2	18.9
YLR414C	1	4.6
YMR291W	1	2.6
YJR062C	4	11.2
YDR424C	4	44.6
YBR172C	6	9.6
YLR002C	4	6
YHR138C	2	28.9
YGL014W	3	3.2
YMR247C	7	5.3
YNL192W	3	3.9
YHR062C	4	15.7
YBR111W-A	1	13.5
YLL029W	4	5.2
YOR123C	1	3
YBR042C	3	10.8
YBL057C	3	13.6
YPL183C	8	10
YLR336C	3	4.2
YIL124W	4	18.9
YOL010W	2	7.1
YHR199C	5	17.4
YLR187W	2	2.1
YGR194C	3	5
YDR469W	2	20
YOR222W	2	8.1
YLR312W-A	3	15.4
YPL139C	4	9.3
YPR019W	4	5.3
YKL190W	4	20
YDL015C	6	17.1
YMR267W	2	8.1
YNL327W	2	2.3
YKL039W	2	4
YER048W-A	4	39.4
YPR137W	6	12.4
YIL044C	2	10.7
YLR022C	4	17.2
YGL232W	3	10
YHR003C	2	5.8
YGL145W	4	7.3
YOR152C	2	10.9
YOR138C	3	4.8
YGL086W	6	7.9
YOL030W	2	6.4
YOR131C	4	22
YDL205C	4	13.1
YGR088W	2	5.2
YDL086W	4	9.9
YOR128C	7	13.7
YDR529C	3	25.2
YDR390C	4	6.6
YHR132C	2	5.1
YNL049C	2	2.9
YNR032C-A	2	32.9
YAL021C	5	5.7
YDR028C	8	11.2
YNL236W	3	3.8
YER088C	2	4
YKL128C	4	15.3
YIL030C	6	3.9
YHR066W;YDR312W	3	6.2
YGL171W	6	11
YPL023C	4	5.5
YIL008W	1	13.1
YDR059C	2	19.6
YKR070W	2	9.9
YNL219C	3	6.1
YPL208W	6	10.1
YOR211C	2	2.6
YGR205W	4	23.8
YFR040W	3	6.1
YOR220W	5	24.2
YEL040W	2	5.6
YHR065C	2	3.8
YMR093W	5	10.5
YKR062W	4	10.7
YMR004W	1	2.5
YDR377W	2	20.8
YBR037C	2	7.8
YJL124C	3	18.6
YCR035C	2	6.3
YGR277C	2	8.2
YLR083C	2	3.7
YGR009C	2	3.7
YGL161C	3	10.6
YKL113C	4	13.1
YLR089C	3	9.5
YER148W	3	14.6
YGL006W	6	5.5
YML042W	5	8.2
YER155C	3	2
YDR404C	1	7
YER133W	2	7.1
YDR460W	2	6.9
YEL027W	1	11.2
YDR391C	2	8.6
YNL201C	4	7.2
YOR020W-A	1	12.2
YDR305C	3	14.3
YDR297W	4	9.7
YLR241W	3	4.5
YOR360C	1	2.5
YHR023W	7	5.7
YHR051W	3	18.9
YJR010C-A	3	33
YIL088C	2	5.5
YGR081C	1	7.6
YLR221C	3	18.6
YNL216W	4	7.6
YNL076W	3	7.5
YNR008W	1	2.1
YER027C	2	5.5
YOR145C	7	25.5
YLR285W	2	8.4
YGL252C	3	4.8
YBR260C	6	12
YDL120W	1	6.3
YJL198W	3	4.2
YNR023W	1	2.5
YLR352W	1	1.5
YKL019W	2	7.3
YMR089C	2	2.8
YFL010C	2	10
YDR428C	1	4.6
YNR067C	1	1.4
YJL019W	1	1.8
YMR298W	2	14
YLR292C	3	14
YPL119C	2	3.1
YPL134C	2	7.7
YPL105C	2	3.2
YPR098C	2	11.8
YGR266W	4	5.8
YDL012C	1	11.2
YKL173W	4	4.4
YBL037W	2	2.5
YIL104C	1	4.1
YDR484W	2	4.2
YPL245W	1	2.6
YBR271W	1	2.9
YOL158C	2	4.1
CON__Q6NXH9;CON__P08729;CON__Q3KNV1	3	5.6
YNL048W	4	7.7
YKR018C	6	8.6
YPR113W	2	9.5
YML013W	2	7
YDR398W	2	4.5
YDR202C	2	6.8
YPR179C	2	3.8
YJL155C	4	9.3
YGR271W	2	1.1
YGL203C	6	10.6
YMR122W-A	1	16.7
YKR072C	2	6.2
YGL151W	3	2.6
YEL029C	1	4.5
YNR022C	2	16.5
YJR031C	5	4.1
YIL005W	3	4.4
YCR011C	5	4.2
YBR187W	1	3.9
YDR019C	3	7.8
YDL122W	5	6.2
YBL051C	2	3.1
YGL201C	3	3.9
YNL062C	4	8.6
YPR040W	1	4.5
YEL051W	3	13.3
YKL186C	2	12
YNL262W	7	3.1
YJL148W	4	18
YPL127C	4	18.2
YJL176C	3	3.8
YNL323W	1	2.7
YHL003C	3	9
YJL042W	6	5.4
YOR048C	6	6.7
YLR051C	3	15.2
YJL137C	3	6.8
YKR024C	3	5.8
YLR438C-A	2	21.3
YJL125C	4	8.9
YJL054W	3	6.1
YGL122C	3	7
YBR279W	5	15.7
YPL270W	2	3.5
YKL141W	3	15.2
YLR229C	1	6.8
YOL056W	2	7.9
YJR032W	7	18.1
YNL263C	1	3.5
YDR195W	2	4.5
YJR101W	1	6.4
YNL264C	2	7.7
YCR067C	2	2.3
YBR074W	2	2.6
YLR034C	4	8.2
YDL164C	5	6.9
YKR028W	4	3.5
YLR397C	3	5.4
YLR069C	6	8.9
YLR275W	2	20
YGR202C	5	13.9
YIL128W	4	5.5
YDR156W	4	15.3
YJL070C	3	3
YJL158C	2	7.9
YKR065C	2	12.2
YNL110C	6	18.6
YNL115C	2	4.5
YHR038W	2	10.4
YPR037C	2	9.7
YLR219W	3	6.5
YLR328W	3	7.5
YDR246W	1	7.3
YMR029C	6	10.5
YHR187W	3	12
YNL258C	3	4.2
YNL009W;YLR174W	2	4
YOR252W	2	13.5
YER105C	6	5.9
YJR059W	3	3.4
YOR003W	3	7.1
YNL315C	2	7.9
YKL135C	3	4.1
YPL082C	1	0.7
YPR105C	2	2.2
YAR042W	5	5.5
YKL018W	3	9.4
YDR245W	1	2.8
YKL002W	1	4.7
YKL047W	1	2.5
YER014W	5	9.3
YDR531W	2	6.3
YGR093W	2	4.9
YMR115W	1	2.6
YGR276C	3	8.1
YBR010W;YNL031C	3	17.6
YLR146C	1	6
YJL159W	2	4.4
YPR049C	2	2
YDR289C	1	3.9
YFR039C	2	4.7
YBL029C-A	1	11.7
YJR041C	2	1.8
YKL175W	2	7
YBR126W-A	1	16.2
YAL044C	2	17.1
YKR038C	4	8.5
YFR001W	3	20.6
YKR020W	3	21.3
Q0045	1	3.2
YDL173W	4	15.3
YEL043W	1	1.2
YLR199C	1	4.3
YGL227W	1	1.1
YKR095W-A	3	37.5
YBR120C	2	17.9
YLR401C	6	7.8
YBR110W	2	4.9
YNL321W	2	4.2
YCR034W	1	2.9
YAL019W	4	3.6
YKR026C	3	10.8
YLR419W	5	4
YML025C	3	9.4
YPR114W	1	4.4
YGL220W	1	10
YHR205W	3	5.6
YER087W	1	2.3
YGL141W	2	2
YCL011C	3	8
YOL087C	1	1.3
YLR214W	2	3.2
YIL002W-A	1	14.5
YOR357C	3	17.9
YOR115C	2	8.6
YBR220C	1	2.3
YJR075W	2	4.8
YJR111C	1	5.3
YOR087W	3	6.7
YLR143W	4	6.4
YBR267W	1	2.5
YNL169C	3	7.4
YJL085W	2	4
YDL150W	1	3.3
YDR329C	1	2.3
YLR163C	1	2.4
YLR126C	2	10.4
YER100W	1	6.4
YEL026W	3	11.9
YJL192C	5	21.8
YPL019C	3	3.4
YDR330W	4	10.2
YKL119C	1	6.5
YMR289W	1	3.2
CON__Q0V8M9	1	1.7
YKL122C	2	21
YPR184W	2	1.6
YCR090C	3	17
YDL085C-A	3	52.9
YPL227C	3	10.5
YIL110W	1	3.7
YKR080W	2	10.3
YDL224C	2	3.1
YMR269W	3	17.1
YBL055C	2	4.5
YCL001W	2	10.1
YPL206C	2	7.5
CON__P00761	1	8.7
YBR058C-A	2	30
YJL166W	2	24.5
YMR285C	1	3.1
YJL096W	1	8.7
YMR185W	2	1.8
YDR092W	3	19.6
YGR158C	1	5.6
YDR345C	3	7.2
YOR118W	3	8.1
YKL164C	2	5.3
YNL191W	2	9.5
YMR080C	1	1.1
YOR288C	4	11.3
YOR094W	1	8.7
YDR257C	4	6.3
YNL059C	4	5.7
YIL064W	3	14
YAL041W	4	4.6
YBL085W	4	4.3
YPL265W	2	3.1
YJL179W	2	16.5
YLR387C	3	7.2
YMR047C	3	3.4
YPR048W	2	2.9
YLR009W	2	8.5
YLR284C	3	12.1
YBR132C	1	2.7
YDR372C	5	17.7
YHR165C	3	1.2
YMR312W	1	4
YML052W	2	6.3
YGL022W	3	4.9
YPL178W	2	10.1
YLR182W	2	2.6
YNL004W	2	5.1
YDR103W	2	2.4
YLR104W	1	7.6
YBR236C	3	6.4
YKR060W	5	17.9
YHR121W	2	12.8
YBR199W	2	4.5
YPR020W	2	18.3
[truncated: 404 more rows]

## Sheet: HeLa
Protein Group	Peptides	Sequence Coverage [%]
IPI00021812;IPI00555610	251	72.9
IPI00456969;IPI00440177	233	58.4
IPI00296337;IPI00376215	212	54.4
IPI00786995	205	52.9
IPI00333541;IPI00302592;IPI00644576;IPI00553169;IPI00910863;IPI00927825;IPI00552416;IPI00657767;IPI00893150	176	76
IPI00014898;IPI00186711;IPI00398002;IPI00398778;IPI00398777;IPI00398779;IPI00398775;IPI00420096;IPI00398776;IPI00887421	173	43.9
IPI00019502;IPI00395772;IPI00742780;IPI00556012;IPI00878695	162	72
IPI00900293;IPI00477536;IPI00943563;IPI00953109;IPI00953286;IPI00945610	154	73.9
IPI00289334;IPI00382697;IPI00940093;IPI00382698;IPI00382699;IPI00798140;IPI00382700;IPI00937774;IPI00798186;IPI00945771	153	75.4
IPI00298994;IPI00642355;IPI00910010	150	77.3
IPI00026781	146	70.8
IPI00844215;IPI00879810;IPI00871535;IPI00843765;IPI00745092	132	64
IPI00010951	122	68.7
IPI00005614;IPI00328230;IPI00333015;IPI00914949;IPI00216704;IPI00783228;IPI00237806	120	58.5
IPI00001159;IPI00788818;IPI00789420	107	49.8
IPI00009342	101	73.3
IPI00024067;IPI00455383;IPI00385931	101	69.9
IPI00889534;IPI00011062;IPI00397498;IPI00926403;IPI00926199	98	76.8
IPI00420014;IPI00740142;IPI00953667;IPI00168235;IPI00927472	98	54
IPI00007928	96	49.7
IPI00029012	92	64.3
IPI00396015;IPI00942045;IPI00011569;IPI00793409;IPI00847501;IPI00396018;IPI00872885;IPI00013003;IPI00157056;IPI00848209;IPI00472339;IPI00796157;IPI00887706;IPI00793750;IPI00220562;IPI00796495	88	48.4
IPI00013452;IPI00909383	85	68.1
IPI00783271;IPI00917568;IPI00917844;IPI00917676;IPI00917975	80	68.4
IPI00307162;IPI00291175;IPI00910496;IPI00909711;IPI00384973	77	72.6
IPI00021048;IPI00645867;IPI00216269;IPI00216268;IPI00385318;IPI00830037;IPI00829909;IPI00479416;IPI00903320;IPI00890779;IPI00908826;IPI00793867;IPI00908443;IPI00890768;IPI00908936;IPI00910624;IPI00908658;IPI00910445;IPI00908764;IPI00020210;IPI00871702;IPI00911101;IPI00908579;IPI00915417	75	43.2
IPI00456919;IPI00643153;IPI00179298;IPI00445401;IPI00746059;IPI00642197;IPI00872822;IPI00646975	74	25.9
IPI00021290;IPI00939422;IPI00935456	73	66.1
IPI00301263;IPI00893035;IPI00893143;IPI00893407;IPI00894050	72	46.4
IPI00746934;IPI00843999;IPI00640981;IPI00646605;IPI00180305;IPI00942168;IPI00386907;IPI00514902	72	20.9
IPI00394838	70	62.4
IPI00479307;IPI00397526;IPI00790503	70	42.7
IPI00455210;IPI00000846;IPI00789340;IPI00514825;IPI00879599;IPI00879443;IPI00792329	69	43.3
IPI00022774;IPI00915799;IPI00916175	69	80.9
IPI00013808;IPI00908458;IPI00845465;IPI00908776;IPI00942539	68	76.1
IPI00295857;IPI00646493	68	68.1
IPI00186290;IPI00909570;IPI00440662	67	73.3
IPI00289819;IPI00903213;IPI00930184;IPI00930044	67	33.8
IPI00479262;IPI00924828;IPI00552639;IPI00927510;IPI00927765;IPI00386533;IPI00925434;IPI00925057;IPI00442069;IPI00796985;IPI00925493;IPI00791833;IPI00925263;IPI00953292;IPI00926127;IPI00926237;IPI00926681	67	50.2
IPI00925413;IPI00759560;IPI00926411;IPI00798400;IPI00384463;IPI00926013;IPI00220365;IPI00926917	67	49.9
IPI00140420;IPI00910438;IPI00945024	65	79.8
IPI00006196;IPI00872028;IPI00292771;IPI00030136;IPI00893398;IPI00847324;IPI00894351	63	40.6
IPI00013508;IPI00759776;IPI00921118;IPI00909239;IPI00019884	63	80.5
IPI00103994;IPI00871954;IPI00939672;IPI00383290	62	58.2
IPI00893918;IPI00000873;IPI00908612;IPI00939335;IPI00646425;IPI00893487;IPI00941098;IPI00788898;IPI00943279;IPI00793323;IPI00893211;IPI00893333	61	58.8
IPI00644127;IPI00910980;IPI00903065;IPI00514082;IPI00514385;IPI00644832;IPI00644198	61	57.1
IPI00011454;IPI00383581;IPI00441414	60	69.7
IPI00411559;IPI00793575;IPI00328298;IPI00947372;IPI00794838;IPI00745048;IPI00792419;IPI00946854;IPI00947202;IPI00944900;IPI00945252;IPI00947558;IPI00792249	60	49.4
IPI00414676;IPI00555614;IPI00514027;IPI00515119;IPI00640129;IPI00746291;IPI00411633;IPI00555915	59	74.3
IPI00645078;IPI00908755;IPI00026119;IPI00641319;IPI00644183;IPI00552452;IPI00646990;IPI00647463;IPI00383182	59	70.9
IPI00002966;IPI00031022;IPI00644547;IPI00642249	58	75.5
IPI00218342;IPI00794900	58	77.6
IPI00328753;IPI00909030;IPI00337736;IPI00783726;IPI00792904;IPI00375814;IPI00942855;IPI00828177;IPI00005146	58	49.7
IPI00742682;IPI00514531	57	32
IPI00021405;IPI00644087;IPI00216953;IPI00514204;IPI00910241	56	77
IPI00026089;IPI00917430;IPI00479561;IPI00917674	56	55.8
IPI00026970;IPI00878978	56	55.2
IPI00449049;IPI00953994;IPI00478427;IPI00477173	56	60.2
IPI00938079;IPI00246058;IPI00797599;IPI00942087;IPI00943244;IPI00926014;IPI00937686;IPI00924740;IPI00925321;IPI00789478;IPI00924996;IPI00798229	55	68
IPI00382470;IPI00784295;IPI00604607;IPI00031523;IPI00910046;IPI00555957;IPI00555799	55	62.3
IPI00216952;IPI00655812;IPI00514320;IPI00514817	54	77.6
IPI00221226;IPI00002459;IPI00442825	54	75.2
IPI00293242;IPI00054042;IPI00217449;IPI00217450;IPI00943949;IPI00927953;IPI00924676;IPI00398199;IPI00478385;IPI00879176;IPI00432873;IPI00952758;IPI00924483;IPI00884976;IPI00853395;IPI00926158;IPI00329161;IPI00514156	53	68.5
IPI00479186;IPI00847989;IPI00910979	53	83.4
IPI00844578;IPI00921264	53	49.9
IPI00022744;IPI00219994;IPI00910737;IPI00910298;IPI00219762	52	67
IPI00024466;IPI00619903;IPI00927111;IPI00917513;IPI00916187	52	49.6
IPI00027230;IPI00939289;IPI00556538;IPI00910360	52	69.6
IPI00219365;IPI00872814;IPI00922115	52	74.7
IPI00299402;IPI00909014	52	60.3
IPI00329633;IPI00908949;IPI00910719	52	71.2
IPI00939304;IPI00793443;IPI00937471;IPI00947034;IPI00947546;IPI00946866;IPI00947241;IPI00514205;IPI00944936;IPI00947253;IPI00947399;IPI00947392;IPI00946708;IPI00947378;IPI00945623;IPI00639960;IPI00945088;IPI00946357;IPI00946140;IPI00945788	52	72.5
IPI00012837;IPI00909299;IPI00028561;IPI00029722;IPI00889664;IPI00896384;IPI00654747	51	59.7
IPI00298961;IPI00893013;IPI00894253;IPI00892935;IPI00894515;IPI00893771;IPI00893889;IPI00894059;IPI00892777;IPI00893403;IPI00892684;IPI00894165;IPI00892827	51	54.6
IPI00031517;IPI00908729	50	58.7
IPI00337541	50	50.3
IPI00784366;IPI00784156;IPI00909735	50	60.6
IPI00024664;IPI00375145	49	61.4
IPI00879004;IPI00478232;IPI00218753;IPI00414101;IPI00953508;IPI00942088;IPI00953043	49	35
IPI00220644;IPI00909560;IPI00604528;IPI00888126;IPI00743713;IPI00871353;IPI00027165;IPI00941093;IPI00909829;IPI00743867	49	77.2
IPI00293464;IPI00909008;IPI00909251;IPI00909177;IPI00922069	49	45.8
IPI00299904;IPI00376143;IPI00219740;IPI00925989	49	67.2
IPI00843975;IPI00872684;IPI00384282	49	68.6
IPI00004860;IPI00759723	48	70.8
IPI00007765;IPI00922694	48	63.9
IPI00215948;IPI00473136;IPI00953077;IPI00514038;IPI00944563	48	72.2
IPI00220834;IPI00871391;IPI00925823;IPI00926445	48	79.1
IPI00644712;IPI00893179;IPI00889791;IPI00893062;IPI00879136	48	70.9
IPI00783313;IPI00943894;IPI00787186	48	56.6
IPI00784154;IPI00917575;IPI00880053;IPI00917983;IPI00915941;IPI00076042;IPI00916653;IPI00917686;IPI00916167;IPI00923547;IPI00954209;IPI00917789	48	80.5
IPI00790702	48	62
IPI00941899	48	70.4
IPI00942979;IPI00643920;IPI00792641;IPI00793119;IPI00789310;IPI00946864;IPI00946973;IPI00788802;IPI00947136	48	86.8
IPI00646182;IPI00006482;IPI00414005;IPI00744194;IPI00644722;IPI00930085	47	51.2
IPI00022228;IPI00894047;IPI00443983;IPI00893650;IPI00442135;IPI00893636;IPI00893741;IPI00892548;IPI00892886;IPI00893773;IPI00894070;IPI00893433;IPI00892788;IPI00894200;IPI00893806;IPI00894372;IPI00893626;IPI00941714;IPI00893892;IPI00893483;IPI00894089;IPI00893195	47	44.3
IPI00100160;IPI00604431;IPI00915424;IPI00791537;IPI00374208;IPI00926727;IPI00925352	47	49.1
IPI00171903;IPI00383296;IPI00645920	47	77.5
IPI00184330;IPI00922181;IPI00795155;IPI00791616;IPI00946193;IPI00946031;IPI00945525	47	57.6
IPI00237884;IPI00867627;IPI00940222;IPI00217683;IPI00431688	47	41.1
IPI00001639;IPI00922792	46	57.9
IPI00003362	46	55.3
IPI00012268;IPI00926258;IPI00926410;IPI00384420;IPI00795529;IPI00925437;IPI00793022;IPI00796340;IPI00925595;IPI00793806;IPI00794915;IPI00794424;IPI00925813	46	60.2
IPI00025273;IPI00218408;IPI00879865;IPI00657864;IPI00657647;IPI00657700;IPI00657768;IPI00917833;IPI00384624;IPI00893596;IPI00916747	46	56
IPI00220219;IPI00908621;IPI00789674	46	59.3
IPI00289499;IPI00925601;IPI00926426;IPI00926103;IPI00925871;IPI00927536;IPI00925253	46	84.8
IPI00299524;IPI00445741;IPI00944455	46	42.2
IPI00396171;IPI00888475;IPI00220113;IPI00927173;IPI00878651;IPI00926984;IPI00910596;IPI00333281;IPI00925569;IPI00877773;IPI00902552	46	55.4
IPI00010796;IPI00878551;IPI00879437;IPI00911004	45	76.4
IPI00921422;IPI00028275;IPI00472887;IPI00749072	45	26.9
IPI00784090;IPI00302925;IPI00794673	45	75.5
IPI00386189;IPI00032158;IPI00478058;IPI00513890;IPI00514816;IPI00413165	45	50
IPI00854642;IPI00303063;IPI00854687;IPI00943203	45	40.9
IPI00013214;IPI00940786;IPI00385434	45	62.4
IPI00554648;CON__P05787;IPI00792642;CON__H-INV:HIT000292931;IPI00787323;IPI00793917;IPI00791912;IPI00793202;CON__Q9H552;IPI00017870;IPI00791341;IPI00795725;IPI00217437;IPI00300725;IPI00299145;CON__P02538;CON__P04259;CON__P48668;IPI00293665;IPI00942257;IPI00909059;IPI00886833;CON__H-INV:HIT000016045;IPI00748057;IPI00930073;CON__P50446;CON__Q8VED5;CON__P04264;IPI00220327;CON__Q01546;IPI00008359;CON…	44	82.8
IPI00009904;IPI00852792;IPI00852730	44	63.6
IPI00027442;IPI00910701;IPI00552860	44	56.5
IPI00166010;IPI00880052;IPI00642900;IPI00410157;IPI00032299	44	24.7
IPI00216008;IPI00853547;IPI00289800;IPI00884082;IPI00645745;IPI00642620	44	77.4
IPI00299608;IPI00456695;IPI00916632;IPI00916809;IPI00917594;IPI00916965	44	59.1
IPI00328257;IPI00413947;IPI00953658;IPI00946351;IPI00385007;IPI00788911	44	53.6
IPI00003519;IPI00917777;IPI00903143	43	61.6
IPI00929344;IPI00004534	43	49
IPI00013894;IPI00479946;IPI00908463	43	67.6
IPI00141318;IPI00604713;IPI00939370;IPI00883950	43	66.9
IPI00157790;IPI00639848	43	28.1
IPI00216694;IPI00947227;IPI00908503;IPI00947454;IPI00010471;IPI00646259;IPI00947292	43	73.3
IPI00217975;IPI00790831	43	69.5
IPI00221325;IPI00915960;IPI00916646;IPI00470913;IPI00942933;IPI00874205;IPI00941935;IPI00926400;IPI00917371;IPI00888992;IPI00926222;IPI00943097;IPI00879540;IPI00917621;IPI00940055;IPI00916803;IPI00915854;IPI00916333	43	22.1
IPI00306369	43	70.9
IPI00719752;IPI00396370;IPI00893301;IPI00893431	43	62
IPI00418471;IPI00552689;IPI00217507;IPI00853115;IPI00908745;IPI00868727;IPI00001453;IPI00910602;IPI00923396;IPI00237671;IPI00853283;IPI00953284	43	87.6
IPI00878314	43	58.5
IPI00940292;IPI00384489	43	49.9
IPI00940673	43	88
CON__P02769;IPI00216773;IPI00878282	42	69.2
IPI00007074	42	75.9
IPI00030275;IPI00646055	42	65.1
IPI00215637;IPI00910433;IPI00293616;IPI00908506;IPI00909544;IPI00646152;IPI00909282;IPI00647597;IPI00071483;IPI00953956;IPI00456933;IPI00954025	42	67.7
IPI00300371;IPI00828110;IPI00179138;IPI00943271	42	42
IPI00304925;IPI00909073;IPI00830052;IPI00942547;IPI00939526;IPI00941328;IPI00910047	42	70.5
IPI00465432;IPI00413732;IPI00872411;IPI00333985;IPI00329352;IPI00447179	42	51.1
IPI00783982;IPI00794911;IPI00794223	42	59.6
IPI00845339	42	70.5
IPI00894287	42	42.7
IPI00017367;IPI00903145;IPI00869155	42	70.5
IPI00783097;IPI00915808;IPI00917798	42	59.8
IPI00007402	41	52.6
IPI00008524;IPI00909378;IPI00410017;IPI00796945;IPI00794246;IPI00556259;IPI00790842;IPI00306870;IPI00796139;IPI00432527;IPI00938302	41	71.1
IPI00008868	41	24.9
IPI00026216;IPI00455333;IPI00902599;IPI00902662;IPI00902884	41	52.2
IPI00185919;IPI00643027;IPI00411690;IPI00383949;IPI00856120;IPI00855786;IPI00855953;IPI00855812;IPI00855721	41	52.2
IPI00026665;IPI00925046;IPI00925511;IPI00925952;IPI00796022;IPI00925203;IPI00925012;IPI00792753;IPI00924591;IPI00910548;IPI00922824;IPI00789831;IPI00789045;IPI00925735;IPI00790419;IPI00927552	41	61.3
IPI00939163;IPI00514983;IPI00513743;IPI00218993;IPI00908988;IPI00910755;IPI00794417;IPI00924863;IPI00152661;IPI00790550;IPI00290094;IPI00797778;IPI00798356	41	60
IPI00941810	41	48
IPI00003865;IPI00037070;IPI00939595;IPI00910870;IPI00007702;IPI00902596;IPI00880019;IPI00844513;IPI00877807	40	70.9
IPI00009960;IPI00470829;IPI00926611;IPI00910079;IPI00915803	40	57.1
IPI00010720;IPI00940257;IPI00909956	40	82.6
IPI00013933;IPI00217182;IPI00746877;IPI00872333;IPI00952810	40	18
IPI00020984;IPI00941747;IPI00477719;IPI00442866;IPI00383227	40	53.6
IPI00022462;IPI00924935;IPI00925384;IPI00790745;IPI00925162;IPI00788798;IPI00219900;IPI00790126	40	53.9
IPI00025252;IPI00847663;IPI00790740;IPI00791418	40	74.7
IPI00025874;IPI00793589;IPI00945851	40	62.1
IPI00027497;IPI00910781;IPI00908881;IPI00556013;IPI00410575	40	69.5
IPI00167941;IPI00514014;IPI00446473	40	11.3
IPI00856098;IPI00215743;IPI00220967;IPI00744135	40	29.5
IPI00396435	40	51.4
IPI00746655;IPI00022143;IPI00902463;IPI00794186	40	49.1
CON__Q04695;IPI00450768;CON__Q9QWL7;IPI00791852;IPI00791156;IPI00240503;IPI00798387;IPI00180956;CON__P02533;IPI00384444;IPI00794047;IPI00792454;IPI00829790;IPI00879511;IPI00796843;IPI00790298;CON__P08779;IPI00217963;CON__Q6IFX2;IPI00793646;IPI00792629;IPI00796480;CON__Q3ZAW8;CON__Q9Z2K1;IPI00789750;IPI00654614;CON__A2A4G1;IPI00290077;CON__P19012;IPI00873598;CON__Q61782;CON__P08730-1;IPI00789536;I…	39	81.7
IPI00000877;IPI00922838;IPI00922127;IPI00922745;IPI00010369	39	47.1
IPI00010740;IPI00216613	39	52.3
IPI00018465;IPI00952607;IPI00552072;IPI00952671;IPI00946633;IPI00916908	39	82.3
IPI00295851	39	50.4
IPI00306959;CON__P08729;CON__Q3KNV1;IPI00792841;CON__Q9DCV7;IPI00791554;IPI00655639;IPI00794122;IPI00290078;CON__P19013;IPI00797452;CON__Q6NXH9;CON__Q6IME9;CON__Q14CN4-1;IPI00103481;IPI00794272;IPI00910219;IPI00793641;IPI00954463;IPI00941806;IPI00793572	39	69.9
IPI00554469;IPI00925553;IPI00655644	39	56.5
IPI00852685;IPI00936125;IPI00935307;IPI00924442;IPI00884341;IPI00936881;IPI00852763	39	33.4
IPI00007927;IPI00232806	38	39.3
IPI00013871;IPI00943207	38	71.2
IPI00017303;IPI00893933;IPI00941267;IPI00940797;IPI00942143;IPI00940255;IPI00942418;IPI00783458;IPI00783348;IPI00816513	38	48.4
IPI00024364;IPI00843876;IPI00908817;IPI00908440;IPI00879855;IPI00880000	38	56.7
IPI00026625;IPI00376609	38	34.2
IPI00031522;IPI00908351	38	57.9
IPI00747810;IPI00163187;IPI00894286;IPI00894471;IPI00893542	38	78.2
IPI00291939;IPI00922333;IPI00553151;IPI00385082	38	36.8
IPI00935649;IPI00419273;IPI00549919	38	53.4
IPI00647286;IPI00456750;IPI00917117;IPI00301475;IPI00383021	38	62.3
IPI00554788;IPI00794267;IPI00941554;IPI00794807;IPI00795353;IPI00942338;IPI00940354;CON__H-INV:HIT000015463;IPI00793702;IPI00790172;CON__Q497I4;IPI00917866;CON__Q92764	38	82.8
IPI00883857;IPI00479217;IPI00644224;IPI00644079;IPI00915829	38	46.7
IPI00003965;IPI00646721;IPI00922910	37	42.8
IPI00607584;IPI00005024;IPI00908888;IPI00909101	37	38.6
IPI00005154;IPI00556260	37	55
IPI00009790;IPI00643196;IPI00642664;IPI00639981;IPI00552290;IPI00645848;IPI00646468;IPI00552617	37	54.6
IPI00790739;IPI00017855;IPI00909879;IPI00382844	37	56.4
IPI00020416;IPI00640197	37	40.8
IPI00027192;IPI00943008;IPI00942946;IPI00641236;IPI00643385	37	57.6
IPI00031461;IPI00940148;IPI00640006;IPI00645255;IPI00514395;IPI00513929	37	79.7
IPI00098902;IPI00926925;IPI00829595;IPI00926312;IPI00910683;IPI00386497;IPI00927344	37	48.2
IPI00333753;IPI00218658;IPI00218662;IPI00925443;IPI00218661;IPI00218664;IPI00218659;IPI00939846;IPI00218660;IPI00922622;IPI00218668	37	16.9
IPI00219420;IPI00414027;IPI00937782;IPI00396534;IPI00941398;IPI00943185;IPI00892957;IPI00236575	37	35.5
IPI00328318;IPI00514126;IPI00219066;IPI00219065	37	33
IPI00438229;IPI00438230	37	64
IPI00746182;IPI00795507;IPI00852741;IPI00515103;IPI00305152;IPI00853220;IPI00953506;IPI00445429;IPI00853290	37	37.5
IPI00872359;IPI00873712;IPI00029485;IPI00917681;IPI00219114;IPI00917166;IPI00555695;IPI00917852;IPI00917189;IPI00917045;IPI00465112;IPI00916359;IPI00916125	37	38.2
IPI00935906;IPI00916757;IPI00914026	37	40.8
IPI00940432	37	59.3
IPI00017895;IPI00719611;IPI00915789;IPI00918022;IPI00917874	36	63.3
IPI00018349;IPI00848350;IPI00785169;IPI00853557;IPI00642305;IPI00032496;IPI00337550;IPI00645911;IPI00441969	36	53.3
IPI00018350;IPI00878310;IPI00877948;IPI00878587;IPI00555581;IPI00878128;IPI00878272;IPI00942307;IPI00878442	36	57.8
IPI00019912;IPI00909582;IPI00020830	36	52.6
IPI00027493;IPI00908885	36	67.3
IPI00219078;IPI00747443;IPI00177817;IPI00914019;IPI00024804;IPI00396118;IPI00872163;IPI00646947;IPI00937311	36	40.8
IPI00179953;IPI00332499	36	68.1
IPI00216951;IPI00917783;IPI00917492;IPI00917399;IPI00917920;IPI00917615	36	74.5
IPI00218319;IPI00642042;IPI00382894;IPI00218320;IPI00909961;IPI00640264;IPI00844078;IPI00900375;IPI00941379	36	81
IPI00290566;IPI00550591	36	78.2
IPI00291783	36	28.1
IPI00828021;IPI00295485	36	49.9
IPI00302927;IPI00921414;IPI00893358	36	75.5
IPI00333771;IPI00218695;IPI00816770;IPI00218696;IPI00807611	36	60.9
IPI00440493;IPI00908963;IPI00549805;IPI00471928;IPI00641249	36	68.4
IPI00553185;IPI00290770;IPI00552715;IPI00514032;IPI00513814;IPI00513703;IPI00514218	36	78.9
IPI00554481;IPI00554611;IPI00604710;IPI00554702;IPI00554722	36	55.1
IPI00746165;IPI00873622;IPI00939854;IPI00903292;IPI00908482;IPI00909688;IPI00940664;IPI00556374;IPI00747236	36	73.3
IPI00795318	36	57.2
IPI00941589;IPI00015952;IPI00782985;IPI00654814	36	45.9
IPI00008274;IPI00646869;IPI00644589;IPI00641881;IPI00647351;IPI00644109;IPI00646269;IPI00642414;IPI00514858;IPI00954082	35	71.2
IPI00012074;IPI00941649;IPI00856038;IPI00910614	35	55.8
IPI00012079;IPI00942600;IPI00908588;IPI00798302;IPI00910983;IPI00788971;IPI00797648	35	60.7
IPI00014516;IPI00218694;IPI00925125;IPI00926763;IPI00925322;IPI00926955	35	39.6
IPI00017617;IPI00798375	35	59.1
IPI00289758;IPI00910745;IPI00902887;IPI00446140;IPI00376289;IPI00874238;IPI00888895;IPI00641266	35	66.3
IPI00297779;IPI00791487	35	77.8
IPI00304596;IPI00922367;IPI00644848;IPI00645010;IPI00847558;IPI00645966;IPI00646520;IPI00647641	35	78.3
IPI00418169;IPI00455315;IPI00334627;IPI00903334;IPI00797556;IPI00909509;IPI00798111;IPI00795925	35	77.3
IPI00844264;IPI00470891;IPI00873244	35	50.3
IPI00639931;IPI00645789	35	71.1
IPI00644055;IPI00856037	35	56
IPI00911039	35	66
IPI00939523;IPI00329791;IPI00010133;IPI00642725	35	40.4
IPI00008240;IPI00910687;IPI00185398;IPI00792878;IPI00793986;IPI00789865;IPI00791738;IPI00792289	34	53
IPI00008982;IPI00218547	34	52.5
IPI00025491;IPI00796657;IPI00910691;IPI00790597;IPI00794324;IPI00879391;IPI00879131	34	79.6
IPI00031397;IPI00916819;IPI00917636;IPI00916682	34	58.2
IPI00480142;IPI00643885;IPI00179057;IPI00644450	34	41.9
IPI00180675;IPI00936821;IPI00179709;IPI00915791;IPI00218345;IPI00410402;IPI00909762;IPI00784332;IPI00795002	34	76.3
IPI00218343;IPI00387144;IPI00166768;IPI00478908	34	76.2
IPI00219005	34	80
IPI00219526;IPI00217872	34	72.4
IPI00296635;IPI00789251	34	56.6
IPI00298788;IPI00414335;IPI00298789;IPI00219330;IPI00556364	34	51.7
IPI00300074	34	57.4
IPI00418313;IPI00556173	34	51
IPI00465248;IPI00759806	34	79.5
IPI00796333;IPI00465439	34	79.9
IPI00761160;IPI00761140;IPI00761035;IPI00760715;IPI00761069;IPI00305750;IPI00413492;IPI00220857;IPI00760909;IPI00220859;IPI00921920;IPI00922832	34	61.7
IPI00930688;IPI00792677;CON__ENSEMBL:ENSBTAP00000016242;IPI00793930;IPI00873427	34	76.3
IPI00909083;IPI00910513;IPI00218829;IPI00642097;IPI00876920;IPI00877106;IPI00876841;IPI00877130;IPI00876976;IPI00943803	34	62.7
IPI00926109;IPI00411733;IPI00927809;IPI00477295;IPI00164906;IPI00795005;IPI00440661;IPI00793739	34	37.1
IPI00005158;IPI00334291;IPI00642982	33	52
IPI00016910;IPI00646839;IPI00922360;IPI00910003;IPI00873286;IPI00939953	33	42.4
IPI00021440;IPI00930226;IPI00790339;IPI00796881	33	88.8
IPI00027107	33	72.5
IPI00027626;IPI00552590	33	67.6
IPI00304577;IPI00256684;IPI00953149;IPI00909810	33	42.6
IPI00294578;IPI00218251;IPI00218252;IPI00873556;IPI00012876;IPI00873911;IPI00290396;IPI00218650	33	56.3
IPI00643435;IPI00295992;IPI00646144;IPI00045921;IPI00178879;IPI00455487;IPI00844009;IPI00513768;IPI00872864;IPI00746226;IPI00514286;IPI00443780;IPI00515125;IPI00644611;IPI00943833	33	54.4
IPI00384456;IPI00106847;IPI00440122;IPI00893449;IPI00892806;IPI00893025	33	31.8
IPI00642904;IPI00555747;IPI00012726;IPI00642944;IPI00644016;IPI00641299	33	53.3
IPI00739117;IPI00852708;IPI00941219;IPI00083708;IPI00902898;IPI00902809;IPI00946618;IPI00941970;IPI00148247;IPI00902970;IPI00953492;IPI00910607	33	18.5
IPI00796891;IPI00004671;IPI00945169;IPI00947238;IPI00909600;IPI00910449;IPI00908744;IPI00790168	33	13.3
IPI00939159	33	80.1
IPI00894498;IPI00021439;CON__P60712;IPI00894365;IPI00479743;IPI00739539;IPI00942659;IPI00740545;IPI00935352;IPI00893981;IPI00894523;IPI00738655;IPI00888712;IPI00887316;IPI00930066;IPI00893604;IPI00807522;IPI00555809;IPI00739998;IPI00917545;IPI00937995;IPI00555733;IPI00556391;IPI00556300;IPI00876919;IPI00942939;IPI00954247;IPI00748022;IPI00954450;IPI00893501;IPI00555675;IPI00937146;IPI00929430;IPI…	32	88.5
IPI00002520;IPI00789370;IPI00795816;IPI00794572;IPI00748411;IPI00909681;IPI00908824;IPI00794549;IPI00794060;IPI00797816;IPI00797146;IPI00795324;IPI00940666;IPI00386540;IPI00797074	32	72.4
IPI00221012;IPI00003964;IPI00946017;IPI00642334	32	17.6
IPI00006451;IPI00936987;IPI00787942;IPI00938290;IPI00794412;IPI00748065	32	44.4
IPI00930710;IPI00007084	32	58.1
IPI00007750;IPI00794663;IPI00335314;IPI00794009;IPI00916823;IPI00797717;IPI00917863;IPI00879535;IPI00942772;IPI00017454;IPI00853556	32	71.7
IPI00011603;IPI00383659	32	62.2
IPI00017283	32	41.7
IPI00018140;IPI00402182	32	57.8
IPI00018931	32	49
IPI00019848;IPI00641743;IPI00219326;IPI00847789;IPI00002469;IPI00795760	32	23.7
IPI00034049;IPI00399170;IPI00445531	32	34.2
IPI00146935;IPI00942042;IPI00235412;IPI00871742;IPI00037283;IPI00910662;IPI00909322;IPI00791569;IPI00446579	32	60.5
IPI00178431;IPI00872438;IPI00792775	32	60.1
IPI00243221;IPI00889668;IPI00478723;IPI00513946	32	33.4
IPI00293655	32	54.3
IPI00299254	32	31.6
IPI00307155;IPI00894514;IPI00894264;IPI00894377	32	30.7
IPI00555883;IPI00473085	32	61.2
IPI00604620;IPI00444262;IPI00183526;IPI00916188;IPI00917429;IPI00916991;IPI00916036	32	41
IPI00784614;IPI00784808;IPI00784936;IPI00871679;IPI00455033;IPI00883870;IPI00784835;IPI00748715;IPI00941395	32	62.1
IPI00916503;IPI00916112;IPI00785096;IPI00918019;IPI00180128;IPI00900322;IPI00903257;IPI00917597;IPI00916463;IPI00915826;IPI00916338;IPI00916588	32	68.3
IPI00873899;IPI00013495;IPI00792186;IPI00642673	32	47.3
IPI00940000;IPI00889541;IPI00651677;IPI00651653;IPI00947363;IPI00952778;IPI00879638;IPI00847768;IPI00023785	32	45.3
IPI00010779;IPI00910322;IPI00238725;IPI00853245;IPI00847219	31	73
IPI00021435;IPI00927053;IPI00879409	31	70.7
IPI00026108;IPI00909648;IPI00815689	31	52.3
IPI00028031;IPI00937735;IPI00178744;IPI00793599;IPI00796120	31	53.8
IPI00398009;IPI00156374;IPI00744488	31	41.6
IPI00169383;IPI00916818;IPI00909158;IPI00910974;IPI00396468	31	80.1
IPI00171798;IPI00936236;IPI00937399	31	54.2
IPI00185146;IPI00514836	31	41
IPI00218922;IPI00903261;IPI00902496;IPI00852625	31	49.2
IPI00219525;IPI00943153;IPI00910950	31	72.9
IPI00375144;IPI00888510;IPI00220038;IPI00888085;IPI00927582;IPI00925539;IPI00414434;IPI00925336;IPI00924874;IPI00867741;IPI00025442;IPI00646992	31	40
IPI00292753;IPI00873087;IPI00852719;IPI00888069;IPI00302156;IPI00883910;IPI00946050;IPI00946081;IPI00853447;IPI00902869;IPI00945737;IPI00902469	31	29.9
IPI00293735	31	34.2
IPI00337495;IPI00472165;IPI00947400;IPI00939578;IPI00945245;IPI00947098	31	48.7
IPI00873767;IPI00375441;IPI00641948;IPI00644386	31	54.4
IPI00396485;IPI00472724;IPI00025447;IPI00940393;IPI00180730;IPI00941522;IPI00879622;IPI00431701;IPI00878103;IPI00431441;IPI00935896	31	74.5
IPI00410693;IPI00470497	31	70.3
IPI00647217;IPI00940643;IPI00815681	31	36.3
IPI00221234;IPI00936002;IPI00909694;IPI00910420;IPI00916990;IPI00916206;IPI00917139;IPI00917841	31	65.3
IPI00937615;IPI00000875;IPI00738381;IPI00909534;IPI00908389;IPI00910941	31	70.3
IPI00007752;IPI00174849;IPI00939129;IPI00908605;IPI00739915;IPI00877930;IPI00945362	30	66.5
IPI00009328	30	60.8
IPI00009896;IPI00647694;IPI00640017	30	70.3
IPI00789551;IPI00017297;IPI00470923	30	47.7
IPI00018206;IPI00910267;IPI00908623	30	75.6
IPI00024095;IPI00745868	30	80.5
IPI00168388;IPI00102936;IPI00386885;IPI00880040	30	56.9
IPI00947127;IPI00217966;IPI00908791;IPI00607708;IPI00939286;IPI00910754;IPI00952964;IPI00795075;IPI00554498	30	78.9
IPI00219018;IPI00789134;IPI00795257;IPI00788737;IPI00797221;IPI00795622;IPI00794605;IPI00793922;IPI00940220	30	89.9
IPI00219077;IPI00514090;IPI00794758;IPI00790872;IPI00790203;IPI00910018;IPI00791706;IPI00792836;IPI00794371;IPI00793500	30	60.9
IPI00221106;IPI00477803	30	42.3
IPI00290142;IPI00921944	30	60.9
IPI00291510;IPI00925196;IPI00924999;IPI00795859;IPI00791628;IPI00795143	30	71.8
IPI00470498;IPI00412714	30	70.2
IPI00554737;IPI00908543;IPI00910732;IPI00168184;IPI00798040;IPI00910515;IPI00798116	30	59.9
IPI00645452;IPI00909140;IPI00647896;IPI00908770;IPI00953417	30	65.5
IPI00735181;IPI00072534;IPI00909477;IPI00788016	30	38.4
IPI00853059	30	49.8
IPI00939707;IPI00024425;IPI00946982;IPI00001516;IPI00218806	30	28
IPI00913848;IPI00000856;IPI00383500	29	57.1
IPI00003918;IPI00795303;IPI00908662;IPI00878133;IPI00908376;IPI00793341;IPI00794736;IPI00794087;IPI00953651;IPI00792159	29	53.2
IPI00009032;IPI00916802;IPI00916922;IPI00917386;IPI00917205	29	61.5
IPI00903226;IPI00220665;IPI00018246;IPI00220663;IPI00220667;IPI00414612;IPI00953711;IPI00855827;IPI00856069	29	31.2
IPI00021808;IPI00908779;IPI00910697;IPI00911023;IPI00940549;IPI00005729	29	59.3
IPI00027443;IPI00556365;IPI00909763;IPI00939491;IPI00556541;IPI00789371;IPI00745398	29	41.8
IPI00029048;IPI00879002;IPI00386569	29	61
IPI00029079;IPI00945620;IPI00887759	29	60.2
IPI00029111;IPI00872788;IPI00028910	29	61
IPI00168262;IPI00450971	29	50.5
IPI00216746;IPI00216049;IPI00640296;IPI00796697	29	68.1
IPI00217952;IPI00299506;IPI00216159	29	48.4
IPI00220373;IPI00946216;IPI00514444	29	39
IPI00514587;IPI00220637	29	51.7
IPI00247871;IPI00744062;IPI00794939;IPI00937273	29	29.7
IPI00294834;IPI00944640;IPI00941148;IPI00032449;IPI00396582;IPI00032453;IPI00944646;IPI00910043;IPI00433478;IPI00796966;IPI00024254;IPI00024572;IPI00032450	29	47.6
IPI00297211;IPI00216046;IPI00646130;IPI00647510	29	32.4
IPI00549205;IPI00305282;IPI00107531;IPI00658205;IPI00894448;IPI00852595;IPI00878541;IPI00798033	29	24
IPI00306518;IPI00019447;IPI00784704;IPI00884225;IPI00796256;IPI00797669	29	30
IPI00553043;IPI00853384;IPI00853044;IPI00853623;IPI00177498;IPI00554434;IPI00853229;IPI00953238;IPI00853476;IPI00604714;IPI00953591	29	34.8
IPI00554777;IPI00925572;IPI00924906;IPI00926480;IPI00925298;IPI00926959;IPI00926760;IPI00925986	29	57.6
IPI00782992;IPI00785023;IPI00784560	29	16.9
IPI00807545;IPI00910458;IPI00514561	29	66.4
IPI00004669;IPI00922793;IPI00921824;IPI00339297;IPI00911074;IPI00101384;IPI00893944;IPI00456717;IPI00160369;IPI00893491	28	55.9
IPI00007682;IPI00946476;IPI00946636	28	62.6
IPI00009104;IPI00909925	28	62.6
IPI00011200;IPI00642548	28	62.9
IPI00014238;IPI00307092;IPI00445108	28	53.1
IPI00017451;IPI00470590;IPI00878312;IPI00878677;IPI00877949	28	46
IPI00020599	28	78.4
IPI00023234	28	60.2
IPI00030774;IPI00396203;IPI00953647;IPI00386607;IPI00816088;IPI00941229;IPI00719188	28	32.3
IPI00031519;IPI00220918;IPI00220919	28	18.7
IPI00032140;IPI00910487	28	71.5
IPI00216975	28	59.9
IPI00219217;IPI00788938;IPI00789173;IPI00556477;IPI00016768	28	69.8
IPI00295400;IPI00412737;IPI00383754	28	76.9
IPI00303476;IPI00790847;IPI00791498;IPI00793271;IPI00792534;IPI00792128	28	72
IPI00784414;IPI00306436;IPI00412752	28	48.1
IPI00402183;IPI00930205;IPI00402184;IPI00402185	28	55.5
IPI00745406;IPI00744648;IPI00479676;IPI00218097;IPI00384432;IPI00879552;IPI00744288;IPI00385301;IPI00303397;IPI00748833;IPI00219817;IPI00398504	28	29
IPI00479786;IPI00855957;IPI00909344	28	51.2
IPI00642584;IPI00784543;IPI00645487;IPI00642244;IPI00640734;IPI00945672	28	38.5
IPI00465233;IPI00745266;IPI00910633;IPI00879876;IPI00910422;IPI00877935;IPI00878425;IPI00877598;IPI00878298	28	54.4
IPI00746351;IPI00183462	28	41
IPI00922108;IPI00027505;IPI00555991;IPI00927691	28	33.5
IPI00941161;IPI00031583	28	38.3
IPI00002894;IPI00655631;IPI00556021	27	35.4
IPI00003818;IPI00651624;IPI00916732;IPI00915775	27	66.5
IPI00008485;IPI00643595;IPI00930318	27	41.2
IPI00009464;IPI00220336	27	40.8
IPI00009542;IPI00477809;IPI00337823;IPI00941467;IPI00549529;IPI00910881;IPI00909974;IPI00910470;IPI00005750;IPI00029683;IPI00791934;IPI00293288;IPI00398845;IPI00909765;IPI00328354;IPI00645649;IPI00927381;IPI00828043;IPI00788795;IPI00925538	27	53.8
IPI00013475;IPI00031370;IPI00930715	27	69.9
IPI00017375	27	49
IPI00873982;IPI00743857;IPI00020501;IPI00744256;IPI00024870;IPI00642716;IPI00794080;IPI00298301;IPI00514201;IPI00302329;IPI00025880	27	10.9
IPI00027223;IPI00927256;IPI00926055;IPI00925000;IPI00925864;IPI00927373;IPI00924576;IPI00023029	27	64.5
IPI00031023;IPI00908582	27	29.3
IPI00105598	27	67.4
IPI00106495	27	32
IPI00218465	27	44.7
IPI00220709;IPI00646748;IPI00218820;IPI00926427	27	60.9
IPI00234252;IPI00797830;IPI00793678;IPI00925226	27	36.6
IPI00291607	27	13.1
IPI00299000;IPI00794875;IPI00807557;IPI00790307;IPI00793498;IPI00798341;IPI00789039;IPI00796006;IPI00879184	27	81.2
IPI00303207	27	55.4
IPI00306960;IPI00643900;IPI00646656;IPI00647678	27	45.8
IPI00329801;IPI00872379	27	80
IPI00410067;IPI00410069;IPI00332936;IPI00953489;IPI00410070;IPI00410071	27	37.8
IPI00413611;IPI00465141;IPI00911056	27	37.6
IPI00640703;IPI00747670;IPI00549861;IPI00872800;IPI00553171;IPI00640551;IPI00747453	27	27.7
IPI00641829;IPI00848161;IPI00790636;IPI00893580;IPI00792043;IPI00894161;IPI00643815;IPI00796920;IPI00642800;IPI00641634;IPI00893920;IPI00892588;IPI00910878;IPI00894545;IPI00893927;IPI00910759;IPI00893446;IPI00642880;IPI00939221;IPI00641325;IPI00640787;IPI00792599;IPI00893059;IPI00893300;IPI00641926;IPI00795722;IPI00791495;IPI00644541;IPI00908716	27	61.9
IPI00903062;IPI00644231;IPI00550212;IPI00790673;IPI00922002;IPI00790459;IPI00921821;IPI00383109;IPI00871615	27	24.9
IPI00743142;IPI00465179;IPI00219585;IPI00793665;IPI00796852;IPI00797580;IPI00385347;IPI00791170	27	41.7
IPI00856116;IPI00855763;IPI00856001;IPI00945254;IPI00383645;IPI00292009;IPI00945423;IPI00856046;IPI00873173;IPI00166197;IPI00645179;IPI00477680	27	27.1
IPI00945818;IPI00002255;IPI00328195;IPI00872127;IPI00939641	27	15.2
CON__Q3SX28;IPI00013991;IPI00513698;IPI00910712;IPI00909308	26	54.9
IPI00001636;IPI00940340;IPI00940152;IPI00385153;IPI00913912;IPI00889628;IPI00889588	26	63.6
IPI00005634	26	23.3
IPI00011285;IPI00910547;IPI00909108	26	45.1
IPI00017184;IPI00657915;IPI00853165;IPI00021458;IPI00853100;IPI00852957;IPI00853038	26	68.7
IPI00018873;IPI00472879;IPI00337370;IPI00922378;IPI00853098;IPI00853507;IPI00853047;IPI00853387;IPI00853449	26	60.5
IPI00023598;IPI00926685;IPI00909781	26	61.3
IPI00027280;IPI00217709;IPI00926528;IPI00941371;IPI00925477	26	17.5
IPI00029737;IPI00219897;IPI00908902	26	45.4
IPI00031420;IPI00954552	26	57.3
IPI00216135;IPI00940084;IPI00296039;IPI00604537;IPI00018853;IPI00940343;IPI00941861;IPI00014581;IPI00000230;IPI00442894;IPI00915324;IPI00793630	26	53.9
IPI00217030;IPI00219894;IPI00646114;IPI00877922;IPI00478986;IPI00945801;IPI00878172	26	74.1
IPI00218918;IPI00549413;IPI00908577;IPI00643231	26	72.8
IPI00257508	26	65.2
IPI00291646;IPI00939493;IPI00552054;IPI00644940;IPI00643337;IPI00647214;IPI00646698;IPI00940262;IPI00374525;IPI00884217	26	30.4
IPI00303300;IPI00909121;IPI00334818;IPI00184854;IPI00794022	26	52.1
IPI00328391	26	43.2
IPI00871467;IPI00334532;IPI00646281;IPI00853275;IPI00927755;IPI00927501;IPI00643864;IPI00853066;IPI00924481	26	26.1
IPI00419237;IPI00789806;IPI00910169	26	61.7
IPI00441473;IPI00064328;IPI00794580;IPI00793983;IPI00952972;IPI00792693	26	42.5
IPI00456359;IPI00456363;IPI00642402;IPI00639962;IPI00456361;IPI00883782;IPI00456365;IPI00456367;IPI00456369;IPI00479363	26	30.9
IPI00456887;IPI00929107	26	39.6
IPI00550689;IPI00910144;IPI00909218;IPI00910259;IPI00893551;IPI00893767;IPI00442288	26	55.4
IPI00884896;IPI00783641;IPI00847482;IPI00885213;IPI00871867;IPI00554786	26	53
IPI00829992;IPI00743335;IPI00010418;IPI00791026	26	31.2
IPI00847995	26	50.9
IPI00895800;IPI00878985;IPI00876962;IPI00872508;IPI00937711;IPI00939502;IPI00020999	26	31
IPI00940237;IPI00644431;IPI00166874;IPI00062206;IPI00910317	26	58.8
IPI00007935;IPI00553102;IPI00555593;IPI00552367;IPI00942043;IPI00103146;IPI00555564	25	57.7
IPI00008164	25	47.2
IPI00009070;IPI00922255;IPI00513811;IPI00550360;IPI00168609;IPI00844077;IPI00642426	25	50
IPI00010154;IPI00910113;IPI00878124	25	64.2
IPI00010349;IPI00917312	25	57.1
IPI00013068;IPI00796161	25	58.2
IPI00871851;IPI00014177;IPI00894340;IPI00893645;IPI00893658;IPI00894199;IPI00893096;IPI00894055;IPI00892810;IPI00894322;IPI00894283;IPI00893902;IPI00892518;IPI00892932;IPI00893477;IPI00893240;IPI00893788;IPI00894088;IPI00893329;IPI00893734	25	68.7
IPI00015953;IPI00477179;IPI00031554	25	41.1
IPI00015973;IPI00556351;IPI00788953;IPI00747462;IPI00022133;IPI00032230;IPI00922914;IPI00215716;IPI00215717;IPI00444820;IPI00383844;IPI00647052;IPI00643241;IPI00641271	25	32.8
IPI00016725	25	40.3
IPI00016801;IPI00027146;IPI00746092	25	48.2
IPI00017334;IPI00793658;IPI00791634;IPI00793442;IPI00909721;IPI00940514;IPI00386679	25	90.4
IPI00020567;IPI00941730;IPI00382580	25	78.4
IPI00020632;IPI00640430;IPI00909521;IPI00642128;IPI00514341;IPI00941527	25	65.8
IPI00021728;IPI00176637;IPI00816442	25	67
IPI00022305;IPI00894416;IPI00892775;IPI00892893;IPI00893030;IPI00064431;IPI00893174;IPI00807524;IPI00892766;IPI00892637;IPI00893309	25	53.7
IPI00022977;IPI00908811;IPI00027487;IPI00909684;IPI00908787;IPI00921866;IPI00878893	25	74.5
IPI00023647;IPI00827491;IPI00828006;IPI00827864	25	31.2
IPI00024661	25	27.1
IPI00028635;IPI00383680;IPI00552972;IPI00552146;IPI00552307;IPI00936387;IPI00941764	25	54.5
IPI00029601;IPI00062884;IPI00746806;IPI00791680;IPI00792087	25	53.3
IPI00030255;IPI00926796;IPI00909548;IPI00908467;IPI00926874;IPI00926601;IPI00927515	25	47.8
IPI00033022;IPI00218889;IPI00514550;IPI00181352;IPI00556437;IPI00942160;IPI00444873;IPI00445318;IPI00914940;IPI00399414	25	38.5
IPI00171844	25	75.1
IPI00183626;IPI00334175;IPI00179964;IPI00556157;IPI00413691	25	71.1
IPI00215888;IPI00871803	25	42.5
IPI00216230	25	55.9
IPI00291483;IPI00909541	25	78.3
IPI00291755;IPI00871723	25	18.5
IPI00294879;IPI00879681;IPI00879993;IPI00877824;IPI00880159	25	51.4
IPI00299571;IPI00644989	25	49.6
IPI00305068;IPI00943860	25	37
IPI00328328;IPI00409717;IPI00924536;IPI00030296;IPI00788730;IPI00794607;IPI00793328;IPI00790077;IPI00793220;IPI00792676;IPI00927069;IPI00815667;IPI00927306;IPI00927480;IPI00791914	25	57.2
IPI00385267	25	46.7
IPI00396378;IPI00414696;IPI00916517	25	70.8
IPI00409635;IPI00893476;IPI00953221;IPI00827920;IPI00827794;IPI00953444;IPI00827663;IPI00446435	25	41.9
IPI00419880;IPI00472119;IPI00736161;IPI00738052	25	72.7
IPI00430472;IPI00005028	25	16.4
IPI00465044;IPI00022997	25	61.7
IPI00550021;IPI00651660;IPI00941779;IPI00877635;IPI00877999;IPI00878524;IPI00877787;IPI00889059;IPI00878827;IPI00219335;IPI00943250	25	53.3
IPI00550523;IPI00845461	25	56.6
IPI00554711	25	45.5
IPI00815732	25	63.4
IPI00848226;IPI00910724;IPI00910221;IPI00910917	25	91.8
IPI00854592	25	84.2
IPI00927819	25	47.5
IPI00930130	25	58.9
IPI00000030;IPI00946908;IPI00219543;IPI00946763;IPI00219544;IPI00947369	24	51.3
IPI00003505;IPI00953289;IPI00847729	24	61.3
IPI00011253;IPI00939811;IPI00855830;IPI00879848	24	86
IPI00152453;IPI00013683;IPI00640115;IPI00644620	24	34.4
IPI00020042;IPI00738042;IPI00216770	24	83.5
IPI00642971;IPI00789435;IPI00023048;IPI00796284;IPI00795920;IPI00793083;IPI00792430	24	37.6
IPI00023919;IPI00745502;IPI00555749;IPI00794839;IPI00896543	24	67.5
IPI00026154;IPI00943074;IPI00829824	24	53.1
IPI00026516;IPI00307395;IPI00739583	24	61.3
IPI00031820;IPI00909657	24	61.2
IPI00069750;IPI00856076;IPI00797595	24	55.8
IPI00100716;IPI00855912;IPI00788826	24	54.4
IPI00414289;IPI00156282;IPI00921488;IPI00300386;IPI00556522	24	43.3
IPI00185374;IPI00335069;IPI00877959	24	59.6
IPI00217223	24	61.6
IPI00217563;IPI00217561;IPI00217562;IPI00549336;IPI00293305;IPI00945878;IPI00945712;IPI00945037;IPI00947385;IPI00946209;IPI00642219;IPI00945168	24	33.3
IPI00647655;IPI00220317	24	23.5
IPI00256861;IPI00550385;IPI00478226;IPI00941241;IPI00256859;IPI00640975;IPI00165470	24	6.4
IPI00429191	24	59.7
IPI00945749;IPI00927647;IPI00470467;IPI00792395;IPI00903331;IPI00880028;IPI00910178;IPI00908675;IPI00924702;IPI00924812;IPI00853510;IPI00925466;IPI00852820;IPI00927126;IPI00926806;IPI00924439	24	45.1
IPI00472303;IPI00398708;IPI00479424;IPI00939690;IPI00394906;IPI00337465;IPI00020096;IPI00412642;IPI00921532;IPI00397666;IPI00337460	24	44.1
IPI00552858	24	95
IPI00792916	24	52.2
IPI00942092;IPI00026904;IPI00220887;IPI00915872;IPI00916724;IPI00909590;IPI00916319	24	53.7
IPI00954528;IPI00954584;IPI00954538;IPI00743503;IPI00785070;IPI00743359;IPI00745699;IPI00954493;IPI00877003;IPI00954271;IPI00719238;IPI00930199	24	65.7
CON__Q0IIK2;CON__Q29443;IPI00298860;IPI00925547;IPI00022463;IPI00903112;IPI00789477;CON__Q2HJF0	23	42
IPI00000690;IPI00157908;IPI00300018;IPI00910786;IPI00910617	23	43.6
IPI00002214;IPI00789457;IPI00873236	23	58.2
IPI00005668;IPI00910990;IPI00843904;IPI00455167;IPI00887673	23	77.7
IPI00006167;IPI00746326	23	54.6
IPI00107752;IPI00006721;IPI00107753;IPI00107750;IPI00107751;IPI00107749;IPI00375150;IPI00375149;IPI00852888;IPI00797011;IPI00852935;IPI00927797;IPI00853261;IPI00853084	23	27.7
IPI00012007;IPI00935818	23	51.6
IPI00012442;IPI00442863	23	60.5
IPI00013070;IPI00167147;IPI00736859;IPI00402391;IPI00386971	23	29.9
IPI00479191;IPI00013881;IPI00908896;IPI00302133;IPI00925021	23	53
IPI00017592;IPI00941510;IPI00941879	23	44.5
IPI00018398	23	66.5
IPI00018522;IPI00942520;IPI00382516;IPI00215734;IPI00914913;IPI00909470;IPI00549813;IPI00747005;IPI00795978;IPI00013578	23	66.8
IPI00019380;IPI00513689	23	38.7
IPI00019918;IPI00155054;IPI00296139;IPI00759454	23	56.1
IPI00021263;IPI00793388;IPI00790689;IPI00789337	23	76.3
IPI00719725;IPI00719821;IPI00719553;IPI00030624;IPI00019540;IPI00719345;IPI00909546	23	41.8
IPI00030781;IPI00795482;IPI00218188;IPI00915952;IPI00797149;IPI00916196;IPI00915841;IPI00916320;IPI00916067	23	40.8
IPI00031410;IPI00643451	23	15.4
IPI00064086	23	89.5
IPI00084828;IPI00046057;IPI00922881	23	57.2
IPI00103552;IPI00646572;IPI00916596;IPI00178161;IPI00876952;IPI00943307;IPI00745554	23	7.9
IPI00106642;IPI00883655	23	61.2
IPI00177728;IPI00165579;IPI00386314;IPI00646632;IPI00642792;IPI00643827;IPI00642656;IPI00646185;IPI00641258;IPI00647662	23	56.4
IPI00182757;IPI00873406;IPI00941031	23	39.4
IPI00219821;IPI00646459;IPI00639912;IPI00514504	23	75.5
IPI00872664;IPI00219913;IPI00640357	23	50.2
IPI00291467;IPI00645646;IPI00455148	23	67.4
IPI00295772;IPI00925291;IPI00926839;IPI00926620;IPI00926468	23	58
IPI00296053;IPI00759715	23	61.6
IPI00298520;IPI00514053;IPI00915422;IPI00439944	23	41.3
IPI00306301;IPI00922697;IPI00642732;IPI00643575;IPI00642820;IPI00024087;IPI00553155	23	56.5
IPI00329389;IPI00867533;IPI00790342;IPI00789282;IPI00797034;IPI00880154	23	57.6
IPI00395627;IPI00552308;IPI00940004;IPI00894008;IPI00410678;IPI00893250;IPI00021841;IPI00853525	23	77.6
IPI00411375;IPI00743873	23	40.2
IPI00432363	23	5.4
IPI00472882;IPI00954570;IPI00954460;IPI00954585;IPI00936210;IPI00472013;IPI00472222;IPI00472825;IPI00930360;IPI00472921;IPI00646225;IPI00885217;IPI00892768;IPI00944472;IPI00936093;IPI00935329;IPI00935944;IPI00937046;IPI00954489;IPI00939851;IPI00936159;IPI00787992;IPI00954545;IPI00472736;IPI00942378;IPI00954550;IPI00954581;IPI00942802;IPI00944585;IPI00944507;IPI00940395;IPI00939643;IPI00941878;IPI…	23	57.5
IPI00783872;IPI00873926;IPI00910763	23	58
IPI00000105;IPI00910019	22	39.6
IPI00000816;IPI00793344;IPI00792761;IPI00795516;IPI00940628;IPI00086909;IPI00903243	22	76.5
IPI00002134;IPI00909766;IPI00607835;IPI00607806	22	58.3
IPI00003527;IPI00794755;IPI00902652	22	77.9
IPI00004968	22	64.7
IPI00791086;IPI00006181;IPI00903191;IPI00789582;IPI00879735;IPI00879112;IPI00797054;IPI00879261	22	54.7
IPI00007188	22	62.4
IPI00014985;IPI00008463;IPI00008465;IPI00216262;IPI00952645;IPI00216263;IPI00216266;IPI00719178;IPI00008338;IPI00216264;IPI00216265;IPI00216267	22	20.7
IPI00008603;IPI00025416;IPI00878173;IPI00916212;IPI00954527;IPI00921887;IPI00645534;IPI00917820;IPI00917457;IPI00917282	22	62.3
IPI00011126;IPI00848107;IPI00895901;IPI00888701;IPI00889191	22	59.8
IPI00013847;IPI00792890;IPI00792217	22	56.5
IPI00020127;IPI00022353	22	50.5
IPI00023006;IPI00930343;IPI00021428;IPI00922693;IPI00514530;IPI00414057	22	62.3
IPI00027252;IPI00797822	22	71.6
IPI00030320	22	64.8
IPI00170935	22	50.1
IPI00178352;IPI00413958	22	8.7
IPI00215911;IPI00792538	22	73.6
IPI00216308;IPI00790304;IPI00910830	22	85.9
IPI00219029;IPI00922421	22	68
IPI00219299	22	7.7
IPI00220642;IPI00910779	22	86.2
IPI00290110;IPI00240675;IPI00940614;IPI00647084	22	62
IPI00291205;IPI00012843	22	29.4
IPI00295542;IPI00893190;IPI00892657;IPI00892540;IPI00892782;IPI00953072;IPI00893068	22	59
IPI00301154	22	29.8
IPI00306290;IPI00794438	22	29.5
IPI00397904;IPI00644506	22	35.2
IPI00413641;IPI00556258;IPI00926520;IPI00455023;IPI00942692;IPI00925567;IPI00879481	22	71.5
IPI00642211;IPI00647859;IPI00642164	22	47.3
IPI00647400	22	51.9
IPI00018813;IPI00743825	22	52.9
IPI00744692	22	54
IPI00853369;IPI00852623;IPI00853087;IPI00383422;IPI00852734;IPI00816626;IPI00412492;IPI00024766;IPI00798165;IPI00941351	22	15.7
IPI00941001;IPI00030116;IPI00643166	22	49.4
IPI00941391;IPI00215613	22	23.7
IPI00000494;IPI00640037	21	54.5
IPI00001734;IPI00941072;IPI00930609;IPI00219478;IPI00940110;IPI00953898	21	56.4
IPI00470573;IPI00005159;IPI00909247;IPI00176593	21	55.6
IPI00006663;IPI00792207;IPI00218914;IPI00910463;IPI00795914;IPI00644628;IPI00644077;IPI00642144	21	47.6
IPI00008475;IPI00008934;IPI00945760	21	63.7
IPI00008943;IPI00939593;IPI00027599;IPI00556368;IPI00556256;IPI00922879;IPI00329577;IPI00219940;IPI00644955	21	52
IPI00010157;IPI00916229;IPI00909932;IPI00916889;IPI00909877;IPI00021772	21	57.5
IPI00012585	21	42.6
IPI00014310;IPI00917192	21	27.7
IPI00014312;IPI00382458;IPI00382459;IPI00917651;IPI00917208;IPI00916926;IPI00025819;IPI00748752;IPI00218764;IPI00218763;IPI00939965;IPI00940948;IPI00175639;IPI00791842;IPI00549214;IPI00789753;IPI00791276	21	32.3
IPI00016249;IPI00945864;IPI00942025;IPI00554715;IPI00939674;IPI00479630;IPI00947512;IPI00947266;IPI00945836;IPI00946077;IPI00946011;IPI00945294;IPI00791041	21	40.4
IPI00016334;IPI00445227	21	37.6
IPI00016610;IPI00027973;IPI00952792;IPI00386254;IPI00946887;IPI00946082;IPI00945164;IPI00945892;IPI00946687;IPI00946372;IPI00947004	21	91.3
IPI00016621;IPI00914938;IPI00914952;IPI00952763;IPI00943035;IPI00166396;IPI00902707;IPI00556111	21	31.2
IPI00018274;IPI00924546;IPI00221347;IPI00943104;IPI00221348;IPI00221346;IPI00915452;IPI00926683	21	24.1
IPI00021129;IPI00005793	21	23.8
IPI00021187;IPI00788942;IPI00944937;IPI00796459;IPI00798367;IPI00797004;IPI00790295	21	59.4
IPI00926977;IPI00021926;IPI00178056;IPI00910829;IPI00878838	21	57.1
IPI00021954	21	15.4
IPI00022793;IPI00893108;IPI00893995;IPI00893587;IPI00383695;IPI00893867	21	48.9
IPI00026833;IPI00641992;IPI00878313	21	56.4
IPI00027834;IPI00465225;IPI00647473;IPI00940312;IPI00909466	21	61
IPI00028091;IPI00908396;IPI00007068;IPI00892652;IPI00554433;IPI00642069;IPI00888282;IPI00946655;IPI00936769;IPI00916540;IPI00916399	21	64.8
IPI00029019;IPI00514856;IPI00181306;IPI00946257;IPI00646016;IPI00644587;IPI00645155;IPI00643473;IPI00645444;IPI00005416	21	44.5
IPI00030706	21	75.1
IPI00031812;IPI00643351;IPI00450235;IPI00643807;IPI00479509;IPI00784202;IPI00250153;IPI00041601;IPI00556023	21	73.1
IPI00032038;IPI00479108	21	32.9
IPI00171438;IPI00946258;IPI00395646;IPI00939560	21	49.3
IPI00942869;IPI00182469;IPI00219868;IPI00219870;IPI00182540;IPI00219869;IPI00219872;IPI00419482;IPI00940850;IPI00219873;IPI00219875;IPI00845519;IPI00219725;IPI00219726;IPI00219728;IPI00219733;IPI00219734;IPI00219735;IPI00219738;IPI00219727;IPI00219730;IPI00219731;IPI00219732;IPI00219737;IPI00219739;IPI00219741;IPI00219742;IPI00219743;IPI00219744;IPI00219745;IPI00219747;IPI00219746;IPI00219748;IPI…	21	30.8
IPI00900325;IPI00183294;IPI00900331;IPI00900318;IPI00646361	21	18
IPI00215687;IPI00289159;IPI00917105;IPI00917826;IPI00215685;IPI00916088;IPI00915822;IPI00953381;IPI00917573;IPI00916210	21	50.2
IPI00216134;IPI00384369;IPI00921977;IPI00745267	21	56.9
IPI00216527;IPI00216530;IPI00021695;IPI00216528;IPI00216526;IPI00216529;IPI00009791;IPI00219296;IPI00219297;IPI00827630;IPI00795833	21	22.5
IPI00218236;IPI00930380;IPI00894274;IPI00892668;IPI00894333;IPI00894160	21	76.1
IPI00218474;IPI00909949;IPI00942494;IPI00909595	21	60.8
IPI00219678;IPI00909998	21	65.1
IPI00220301;IPI00910553	21	83
IPI00291419	21	57.3
IPI00294536;IPI00941907;IPI00795518;IPI00260209;IPI00887011;IPI00796172	21	63.4
IPI00297982;IPI00900305;IPI00900297;IPI00644287;IPI00914525	21	54.9
IPI00298058;IPI00903259;IPI00655641;IPI00911042	21	32.1
IPI00855940;IPI00795569;IPI00302458;IPI00009645	21	23.8
IPI00305166;IPI00921913;IPI00895897	21	45.7
IPI00305383	21	70.2
IPI00328715	21	48.3
IPI00329692;IPI00218830;IPI00478260;IPI00030223;IPI00477856;IPI00922811;IPI00844539;IPI00815834	21	50.6
IPI00337494;IPI00412742	21	47.4
IPI00375380	21	63.2
IPI00395694;IPI00455127;IPI00944945;IPI00872398;IPI00455125;IPI00946283	21	31.1
IPI00396627;IPI00789842;IPI00798145;IPI00398823;IPI00398822;IPI00940094	21	37.5
IPI00465436	21	50.5
IPI00549672	21	63.7
IPI00647915;IPI00550363;IPI00644531;IPI00922126;IPI00947530	21	83.6
IPI00550746;IPI00871312;IPI00647418;IPI00646767	21	63.7
IPI00550917;IPI00946809;IPI00219489;IPI00940778;IPI00914987;IPI00946591	21	67.9
IPI00646083;IPI00744375;IPI00871885;IPI00930152;IPI00930577;IPI00930483;IPI00930165;IPI00747198;IPI00953891;IPI00954179;IPI00953917;IPI00954246;IPI00954104;IPI00953922;IPI00954289;IPI00954291;IPI00893810;IPI00954162;IPI00953905;IPI00954062;IPI00953890;IPI00954205;IPI00953995;IPI00953168;IPI00954156;IPI00954533;IPI00954252;IPI00953934;IPI00954227;IPI00954260;IPI00941193;IPI00942737;IPI00887461;IPI…	21	59.7
IPI00871372;IPI00328911	21	12.3
IPI00873472;IPI00178798	21	26.3
IPI00874277;IPI00939172;IPI00022628;IPI00942205;IPI00020771;IPI00797162	21	33
IPI00930665;IPI00942023;IPI00946328;IPI00004657;IPI00953909;IPI00954173;IPI00946178;IPI00953945;IPI00953916;IPI00954238;IPI00954138;IPI00954285;IPI00953919;IPI00954127;IPI00954059;IPI00953953;IPI00953901;IPI00954218;IPI00954111;IPI00953932;IPI00954048;IPI00954233;IPI00954074;IPI00954158;IPI00472753;IPI00954046;IPI00954113;IPI00954079;IPI00953936;IPI00954237;IPI00954256;IPI00954477;IPI00954103;IPI…	21	66.7
IPI00952909;IPI00019376	21	49.9
IPI00001091	20	27.7
IPI00002804;IPI00514041;IPI00005990;IPI00514557;IPI00926742;IPI00927518	20	27.1
IPI00068506;IPI00005045;IPI00925351	20	34.4
IPI00005161;IPI00000477;IPI00927156;IPI00925920;IPI00926315;IPI00925705	20	76.3
IPI00005198;IPI00643578;IPI00641665	20	65.4
IPI00006025;IPI00790281;IPI00719256;IPI00791478;IPI00792661;IPI00383381;IPI00793338	20	27.2
IPI00006725;IPI00903057	20	27
IPI00008215	20	50.9
IPI00008530;IPI00556485;IPI00791448;IPI00794884;IPI00871646;IPI00793002;IPI00791188;IPI00797741;IPI00868999;IPI00790287;IPI00798371;IPI00940411;IPI00062124	20	66.9
IPI00009329;IPI00939218;IPI00644301;IPI00514575	20	9.8
IPI00011619;IPI00922088	20	44.1
IPI00012066;IPI00796337;IPI00795754;IPI00027970;IPI00410587;IPI00550365;IPI00167750;IPI00101278;IPI00410586;IPI00796442;IPI00790019;IPI00941606;IPI00789448	20	74.3
IPI00012795;IPI00642205	20	82.2
IPI00016932;IPI00795687;IPI00385017	20	24.3
IPI00018968;IPI00604676;IPI00646350;IPI00604652	20	57.7
IPI00019450;IPI00646322;IPI00646813;IPI00642416;IPI00902796;IPI00642895;IPI00219287;IPI00760707	20	43.3
IPI00022881;IPI00300446;IPI00922104	20	12
IPI00029468;IPI00908883	20	67.3
IPI00030131;IPI00791301;IPI00873716;IPI00181409;IPI00830089;IPI00795693;IPI00795286	20	54.8
IPI00033130;IPI00640965;IPI00647006	20	70.2
IPI00044761;IPI00945342;IPI00945494	20	47.7
IPI00075081;IPI00604399;IPI00604576;IPI00926908;IPI00604753;IPI00925767;IPI00792112;IPI00795806	20	20.1
IPI00152377;IPI00791132;IPI00926152;IPI00927424;IPI00795560	20	23.7
IPI00183508;IPI00385754;IPI00816829	20	64.1
IPI00215901;IPI00218988;IPI00172460;IPI00921960;IPI00922165;IPI00218989	20	76.6
IPI00215965;IPI00797148;IPI00760620;IPI00644968;IPI00879518;IPI00879501;IPI00797902;IPI00909288;IPI00176692;IPI00411329;IPI00742127;IPI00908994;IPI00789127;IPI00869068;IPI00879258;IPI00939959	20	60.2
IPI00217143;IPI00902754;IPI00940951;IPI00942396;IPI00789678;IPI00789403;IPI00798202;IPI00909676;IPI00798331;IPI00887220;IPI00477361	20	51
IPI00246975;IPI00845493	20	81.3
IPI00916847;IPI00290416;IPI00916410;IPI00216105;IPI00216106;IPI00908669;IPI00878789	20	56
IPI00291006;IPI00924593;IPI00927864	20	67.8
IPI00298547	20	89.4
IPI00302047	20	62.2
IPI00332371;IPI00925520;IPI00940003	20	34.2
IPI00465222;IPI00937706;IPI00373870;IPI00411592;IPI00910580;IPI00879130	20	12
IPI00377261;IPI00063245;IPI00942585	20	50.3
IPI00386271;IPI00940497;IPI00911062;IPI00916395	20	41.3
IPI00395865;IPI00646512;IPI00879702;IPI00552530;IPI00647914;IPI00642026;IPI00947544	20	64.2
IPI00465085;IPI00880164;IPI00952992;IPI00879716;IPI00412498;IPI00939355	20	47.2
IPI00465365;IPI00954480	20	73.8
IPI00470509;IPI00791223;IPI00900327	20	85.8
IPI00641384;IPI00031242;IPI00166487;IPI00896436;IPI00219314;IPI00872611;IPI00167711;IPI00384060	20	17.2
IPI00641706;IPI00643158;IPI00646972	20	57.2
IPI00719680;IPI00411453;IPI00289608;IPI00411677;IPI00413686	20	21.6
IPI00744711;IPI00894110;IPI00892880	20	35.5
IPI00783625;IPI00910544;IPI00644196;IPI00792875	20	71.5
IPI00789155;IPI00941900	20	66.3
IPI00790627;IPI00216689	20	74.2
IPI00815767	20	68.9
IPI00844000	20	31.9
IPI00902564;IPI00012462;IPI00945725;IPI00845305;IPI00945881;IPI00939283;IPI00945560;IPI00946890;IPI00945739;IPI00946070	20	46.5
IPI00908469	20	57.9
IPI00930234;IPI00930572;IPI00943924;IPI00930672;IPI00946086;IPI00472057;IPI00954147;IPI00930526	20	59.1
IPI00939354	20	62.1
CON__ENSEMBL:ENSBTAP00000024146;IPI00025426;IPI00478003	19	19.6
IPI00000874;IPI00640741;IPI00641244	19	73.9
IPI00001960;IPI00903323;IPI00394749;IPI00165936;IPI00027193;IPI00294443;IPI00221328;IPI00514835;IPI00853014;IPI00384724;IPI00022974	19	79.1
IPI00002449;IPI00514112;IPI00375236;IPI00514183;IPI00514643;IPI00217565;IPI00375233;IPI00217567;IPI00478370;IPI00375235;IPI00828158;IPI00386765;IPI00020973;IPI00940499;IPI00220048;IPI00945522;IPI00006232;IPI00941003;IPI00171460;IPI00220052;IPI00298070;IPI00328206;IPI00472785;IPI00171931;IPI00031294;IPI00328978;IPI00401940	19	26.8
IPI00785113;IPI00006207;IPI00382733;IPI00386687;IPI00914853;IPI00852682;IPI00853016;IPI00743906	19	34.2
IPI00006980;IPI00792100	19	80.7
IPI00010697;IPI00216222;IPI00216223;IPI00216224;IPI00915974;IPI00917593	19	21.2
IPI00010706;IPI00915302	19	44.1
IPI00011416;IPI00908564	19	67.7
IPI00013485;IPI00165486;IPI00871956;IPI00940323;IPI00943304;IPI00479366;IPI00386445;IPI00877829;IPI00878284;IPI00798353;IPI00479281;IPI00878297;IPI00442381;IPI00017346;IPI00791289	19	60.1
IPI00013890;IPI00411765	19	75
IPI00793381;IPI00014151;IPI00794383;IPI00946249;IPI00795037;IPI00794344;IPI00945689;IPI00947396;IPI00793676	19	44.6
IPI00472442;IPI00016832;IPI00871889;IPI00910408;IPI00910833	19	86.6
IPI00017292;IPI00927799;IPI00219893;IPI00788993;IPI00792321;IPI00925083;IPI00926114;IPI00924607;IPI00925425	19	33.4
IPI00017596;IPI00910350	19	80.6
IPI00017672;IPI00300865;IPI00064917	19	84.3
IPI00020898;IPI00552941;IPI00478653;IPI00300321;IPI00641592;IPI00873914;IPI00930650	19	30.5
IPI00021700;IPI00847600;IPI00167254;IPI00847136	19	78.5
IPI00026215	19	51.8
IPI00026689;IPI00073536;IPI00925841;IPI00376955;IPI00414292;IPI00394661;IPI00914963;IPI00383457	19	73.6
IPI00923468;IPI00900269;IPI00029822;IPI00293426;IPI00900285;IPI00900328;IPI00900338;IPI00647560;IPI00640994;IPI00103451;IPI00642503;IPI00645885;IPI00643691;IPI00644329;IPI00444046;IPI00009101;IPI00550342;IPI00925446;IPI00647749	19	14.6
IPI00045396;IPI00946092	19	71.4
IPI00100151;IPI00788157	19	26.2
IPI00102864;IPI00917193;IPI00555601;IPI00005118	19	25.7
IPI00156689;IPI00184402;IPI00789469;IPI00797605;IPI00023442;IPI00954279	19	65.4
IPI00914061;IPI00165041;IPI00941770;IPI00555853;IPI00909120	19	18.1
IPI00216225;IPI00921401;IPI00216221;IPI00921080	19	21.8
IPI00873228;IPI00218728;IPI00909586;IPI00953036;IPI00760905	19	54.9
IPI00221088;IPI00954541;IPI00925580;IPI00879238;IPI00847192;IPI00478327;IPI00647546;IPI00853062;IPI00879512	19	60.3
IPI00242630;IPI00953324;IPI00654611;IPI00894104;IPI00784196;IPI00893838;IPI00894230	19	31.9
IPI00924510;IPI00293845;IPI00375454;IPI00925200;IPI00927193;IPI00910844	19	11
IPI00297084;IPI00910419	19	54.4
IPI00815713;IPI00815944;IPI00815731;IPI00298696	19	17
IPI00299573;IPI00397676;IPI00642454;IPI00478896	19	55.6
IPI00304612;IPI00398983;IPI00936705;IPI00398949;IPI00909017;IPI00432865	19	65
IPI00304692;IPI00939558;IPI00816796;IPI00061178;IPI00552938;IPI00643486;IPI00004450;IPI00938339;IPI00167369;IPI00936309	19	46.8
IPI00328170;IPI00916474;IPI00916800;IPI00916659	19	36.2
IPI00328319;IPI00645329;IPI00877934;IPI00877802;IPI00645757;IPI00947393	19	63.1
IPI00873223;IPI00939504;IPI00329331;IPI00395676;IPI00946647;IPI00946873;IPI00945447;IPI00945562;IPI00945711;IPI00946068;IPI00946012;IPI00944947;IPI00945282	19	41
IPI00926648;IPI00337741;IPI00794973;IPI00925016;IPI00924544;IPI00926864;IPI00927573;IPI00925745;IPI00924765;IPI00926401	19	41.4
IPI00465028;IPI00797270;IPI00451401;IPI00796633;IPI00844224	19	77.6
IPI00642256;IPI00218782;IPI00026185;IPI00646047;IPI00647677;IPI00903103	19	72.1
IPI00646779;IPI00006510	19	52.8
IPI00655604;IPI00472138	19	57.7
IPI00658000;IPI00940014;IPI00165467;IPI00953668	19	36.6
IPI00748807;IPI00930629;IPI00221235;IPI00909318;IPI00953414	19	18.9
IPI00783781;IPI00925674;IPI00925259;IPI00925071;IPI00909446	19	13.1
IPI00789324;IPI00791432;IPI00788705;IPI00790671	19	40.9
IPI00793812	19	47.8
IPI00797206	19	57.9
IPI00828098;IPI00953288;IPI00218094;IPI00642126;IPI00954050;IPI00217287;IPI00470478;IPI00935146	19	4.5
IPI00908424	19	76.4
IPI00930479	19	68.9
IPI00930524;IPI00952711;IPI00941561	19	68.9
IPI00942028	19	29.7
IPI00011118;IPI00946732;IPI00100213;IPI00741117;IPI00945295;IPI00438859;IPI00876866;IPI00438860	19	44.3
CON__P34955;IPI00304064;IPI00873708;IPI00377229;IPI00221128;IPI00607548	18	42.1
IPI00001466;IPI00940934;IPI00854834;IPI00893067;IPI00913926;IPI00917887;IPI00893935	18	25.4
IPI00873829;IPI00001539	18	67.8
IPI00004902;IPI00556451	18	64.7
IPI00005724;IPI00927255;IPI00925884;IPI00924801;IPI00926882;IPI00925235	18	50.6
IPI00005780;IPI00607723;IPI00219856;IPI00924749;IPI00924555	18	24.1
IPI00007401;IPI00793997	18	26.7
IPI00007955;IPI00556381;IPI00789219;IPI00394650;IPI00549368;IPI00797647;IPI00785168;IPI00937485;IPI00795649;IPI00793371	18	44.3
IPI00008552	18	66
IPI00009253;IPI00942239;IPI00748037;IPI00908301;IPI00748905	18	78.6
IPI00009368	18	63
IPI00009747;IPI00923506;IPI00923487;IPI00792647	18	33.3
IPI00011107;IPI00953980	18	45.6
IPI00012535	18	55.2
IPI00013862;IPI00787559;IPI00938328;IPI00892966;IPI00892836	18	75.5
IPI00014424;IPI00556204;IPI00938077	18	54
IPI00015842	18	62.5
IPI00015897;IPI00885057;IPI00869333	18	62
IPI00015947;IPI00910075	18	59.1
IPI00017726;IPI00336094;IPI00639797	18	92.3
IPI00894409;IPI00018452;IPI00917016;IPI00852917;IPI00892994;IPI00643325;IPI00645712;IPI00645270;IPI00642976;IPI00646121;IPI00647692;IPI00642168;IPI00644561;IPI00643422;IPI00642736;IPI00640313;IPI00917163;IPI00552982;IPI00645385	18	41.5
IPI00019407;IPI00646262	18	71
IPI00020672;IPI00645171	18	35
IPI00020956;IPI00514127;IPI00514330;IPI00922032	18	74.2
IPI00021831;IPI00789368	18	54.1
IPI00022275;IPI00924492;IPI00927495;IPI00926992;IPI00927252;IPI00927452;IPI00927794	18	37.5
IPI00025366;IPI00793839;IPI00383539;IPI00795080;IPI00796979;IPI00791780;IPI00791211;IPI00795682;IPI00792509	18	46.1
IPI00026530	18	54.1
IPI00029629	18	35.2
IPI00029764;IPI00908449	18	46.5
IPI00472171;IPI00030179;IPI00872387;IPI00871827;IPI00794746;IPI00953028;IPI00941488;IPI00940164;IPI00878826;IPI00790291;IPI00793342;IPI00644570;IPI00929412	18	59.1
IPI00031801;IPI00219147;IPI00219148;IPI00555698;IPI00790453	18	67.7
IPI00941534;IPI00816201;IPI00033025;IPI00873656;IPI00787607;IPI00900267;IPI00878026;IPI00011589;IPI00939537;IPI00952695;IPI00183878;IPI00248126;IPI00953305;IPI00884240;IPI00642666	18	44.3
IPI00096066;IPI00945507;IPI00921931;IPI00164300;IPI00888064;IPI00155466	18	46.1
IPI00103467;IPI00026663;IPI00908927;IPI00384967	18	48
IPI00152981;IPI00790834;IPI00789507;IPI00790269;IPI00910925;IPI00790871	18	35.4
IPI00154451;IPI00941928;IPI00640677;IPI00178649;IPI00954146;IPI00647775;IPI00180322;IPI00178852;IPI00878159;IPI00878647;IPI00878004;IPI00878459;IPI00878804	18	26.2
IPI00154473;IPI00945964;IPI00790795;IPI00788871;IPI00946925;IPI00026321	18	27.6
IPI00163505;IPI00215801;IPI00942853;IPI00746554;IPI00647282;IPI00514831;IPI00644764;IPI00386141;IPI00376960;IPI00376963;IPI00376962;IPI00168431;IPI00853448;IPI00879910;IPI00878725;IPI00852586;IPI00915257	18	44.9
IPI00170692;IPI00374657;IPI00640416;IPI00929577;IPI00642826	18	61.4
IPI00216138;IPI00556415;IPI00386638	18	84.6
IPI00216318;IPI00759832;IPI00640721;IPI00645801	18	72.4
IPI00216587;IPI00645201	18	62
IPI00219649;IPI00219352;IPI00794609;IPI00792672;IPI00795559	18	44.1
IPI00642374;IPI00549849;IPI00299313;IPI00219513;IPI00549820;IPI00641843;IPI00219512;IPI00549253;IPI00643425;IPI00642987;IPI00640279	18	54.9
IPI00219729;IPI00945233;IPI00796094;IPI00797802	18	67.8
IPI00220503;IPI00789792;IPI00791846;IPI00789999;IPI00789063;IPI00791194	18	56.9
IPI00220527;IPI00183530;IPI00183274;IPI00556082;IPI00794980	18	44.9
IPI00290279;IPI00234368	18	72.4
IPI00472160;IPI00643259;IPI00291316;IPI00940816;IPI00941678;IPI00908313	18	22.1
IPI00292135;IPI00647596;IPI00645733;IPI00646282;IPI00640536	18	28.3
IPI00293260;IPI00844115;IPI00873764	18	26.6
IPI00658023;IPI00298347;IPI00658002;IPI00793028	18	40.9
IPI00300127;IPI00921516	18	26
IPI00300659;IPI00909174;IPI00910274	18	40.5
IPI00301280;IPI00926007;IPI00383085;IPI00101969;IPI00942873;IPI00887362;IPI00936470;IPI00873759;IPI00943303	18	50.5
IPI00788782;IPI00302840	18	16.3
IPI00303882;IPI00943550;IPI00106668	18	62.4
IPI00306048;IPI00384123;IPI00744833	18	26.4
IPI00307200	18	37.3
IPI00376317;IPI00641449	18	20.8
IPI00412579;IPI00413986;IPI00035167;IPI00478277;IPI00847276;IPI00940624;IPI00847688	18	70
IPI00414384;IPI00031107;IPI00936508	18	47.1
IPI00890837;IPI00465022;IPI00645162	18	12.2
IPI00892541;IPI00645431;IPI00894269;IPI00465128;IPI00894467;IPI00640922;IPI00642962;IPI00513728;IPI00894130;IPI00941157;IPI00796135;IPI00641784;IPI00788873;IPI00641833;IPI00939983;IPI00795207;IPI00795787;IPI00790683;IPI00793299;IPI00829720;IPI00792708	18	28.1
IPI00479306;IPI00910237;IPI00383971	18	61.6
IPI00550451;IPI00027423;IPI00902512;IPI00410128	18	70
IPI00940950;IPI00554723;IPI00853161;IPI00646899;IPI00398057;IPI00064765;IPI00893680;IPI00894025;IPI00853485;IPI00894078;IPI00935878;IPI00937125;IPI00376188;IPI00894342	18	62.2
IPI00604664;IPI00940744;IPI00925023;IPI00927308;IPI00927225;IPI00925853;IPI00924768;IPI00926963	18	33.5
IPI00646304;IPI00791367	18	63.4
IPI00647650;IPI00941359;IPI00793882;IPI00789224;IPI00792326	18	64.2
IPI00743716;IPI00940006;IPI00893004;IPI00892868;IPI00892737;IPI00745649;IPI00749025;IPI00472035;IPI00940303;IPI00941616;IPI00940056;IPI00940815;IPI00941414;IPI00940051;IPI00954500;IPI00942050;IPI00954063;IPI00938154;IPI00954472;IPI00472605;IPI00954575;IPI00954427;IPI00942238;IPI00930265;IPI00940042;IPI00954054;IPI00795906;IPI00654689;IPI00954442;IPI00943622;IPI00938394;IPI00953957;IPI00940438	18	47.8
IPI00792065	18	42.1
IPI00792422;IPI00936037;IPI00884375;IPI00797872;IPI00514705;IPI00456853;IPI00556261;IPI00930045;IPI00470523;IPI00294810;IPI00871172;IPI00914664;IPI00745075;IPI00941002	18	25.2
IPI00797887	18	39.6
IPI00908375	18	57.5
IPI00909075	18	61.9
IPI00916111;IPI00915869;IPI00916861;IPI00916253	18	48.3
IPI00936738;IPI00644766;IPI00952955;IPI00012280	18	42
IPI00000792;IPI00647366;IPI00641565;IPI00642016;IPI00874075;IPI00645425	17	65.7
IPI00002478;IPI00216762;IPI00216760;IPI00216758;IPI00514800	17	31.2
IPI00004273;IPI00925670;IPI00924634;IPI00926163	17	23.7
IPI00005719;IPI00937805;IPI00922662;IPI00917079;IPI00334174;IPI00185217	17	72.7
IPI00793201;IPI00006252;IPI00910647	17	65.2
IPI00006865	17	63.3
IPI00007102;IPI00745272;IPI00032575;IPI00909336;IPI00922891;IPI00792035	17	37.1
IPI00007675;IPI00909015;IPI00927867;IPI00796377	17	44.2
IPI00009950	17	57.3
IPI00010080;IPI00924637;IPI00924854	17	41.9
IPI00848334;IPI00867746;IPI00010368;IPI00867529;IPI00006265;IPI00853543	17	27.7
IPI00010896	17	87.1
IPI00012011;IPI00909841	17	81.9
IPI00012645;IPI00218207;IPI00941774	17	8.3
IPI00013122	17	35.2
IPI00014213;IPI00926560;IPI00795629;IPI00927574	17	21.3
IPI00015018;IPI00643288;IPI00878867	17	61.9
IPI00015602;IPI00793189;IPI00791887	17	39.1
IPI00016862;IPI00759575;IPI00953236;IPI00953628;IPI00953696;IPI00794573	17	55.2
IPI00017376;IPI00478968;IPI00642931	17	29.7
IPI00018146;IPI00796727;IPI00651755	17	61.2
IPI00019812;IPI00793942;IPI00922155;IPI00556455	17	44.5
IPI00022891;IPI00556601	17	54.4
IPI00025512;IPI00909453;IPI00924436	17	89.3
IPI00025721;IPI00797970;IPI00797314;IPI00788801	17	50.6
IPI00026230;IPI00940955;IPI00923539	17	47.9
IPI00027341;IPI00917562;IPI00917178	17	56.9
IPI00742743;IPI00657704;IPI00029778;IPI00657708;IPI00892902;IPI00877813;IPI00853388	17	14.4
IPI00033036;IPI00300763;IPI00789396;IPI00797344	17	41.6
IPI00219774;IPI00063234;IPI00788668;IPI00789242;IPI00925327;IPI00924946;IPI00925126;IPI00554752;IPI00924714;IPI00792039	17	55.7
IPI00072377;IPI00915958	17	60.7
IPI00100656;IPI00644037;IPI00301279;IPI00936587;IPI00642626	17	38
IPI00100980;IPI00922156;IPI00910301	17	40.7
IPI00170596	17	19.9
IPI00171127;IPI00478960;IPI00053288;IPI00383229;IPI00238081;IPI00432360;IPI00552189;IPI00552813	17	25.7
IPI00216171;IPI00791564;IPI00792715;IPI00790892	17	60.4
IPI00871890;IPI00872089;IPI00290738;IPI00871365;IPI00216184;IPI00400849;IPI00006612;IPI00470905;IPI00646376	17	39.8
IPI00216219;IPI00941530;IPI00795990;IPI00335824;IPI00796792	17	17.1
IPI00216319;IPI00794254;IPI00827595;IPI00879350	17	62.2
IPI00216592;IPI00477313;IPI00909232;IPI00759596;IPI00759822;IPI00868835;IPI00027569;IPI00735540;IPI00887991;IPI00911096;IPI00910718;IPI00910666;IPI00877664;IPI00790685;IPI00166137	17	62.8
IPI00216654;IPI00292387	17	24.8
IPI00219616;IPI00552495;IPI00218371;IPI00917032;IPI00643000	17	50.9
IPI00718888;IPI00219617;IPI00947377;IPI00947401;IPI00642461;IPI00947213	17	51.7
IPI00290460;IPI00885107;IPI00921947;IPI00910276	17	56.2
IPI00291930;IPI00397519	17	32.8
IPI00643591;IPI00293396;IPI00939879;IPI00909722;IPI00909354;IPI00910023	17	27.7
IPI00295081;IPI00299830;IPI00789213;IPI00888531	17	61.9
IPI00295098;IPI00797747;IPI00947333	17	68.3
IPI00295386;IPI00795334;IPI00909888	17	72.2
IPI00296141;IPI00555697	17	40.4
IPI00298289	17	55.5
IPI00306043;IPI00935463;IPI00397024	17	31.3
IPI00328415;IPI00871319;IPI00446235;IPI00879792;IPI00879692	17	56.3
IPI00329625;IPI00940204;IPI00945654;IPI00477123;IPI00945791;IPI00946301;IPI00946602;IPI00946413;IPI00946836;IPI00946637;IPI00947237	17	37.5
IPI00332511;IPI00798041;IPI00789032;IPI00376973;IPI00944548;IPI00944557;IPI00376972;IPI00020850;IPI00376974;IPI00178803;IPI00032462;IPI00930424;IPI00871687;IPI00556132;IPI00789417	17	51.9
IPI00394758;IPI00333619;IPI00789301	17	38.8
IPI00395939;IPI00334907;IPI00952566;IPI00878839;IPI00879061	17	68.1
IPI00943181;IPI00384051;IPI00746205;IPI00941428	17	63.8
IPI00384265;IPI00472054;IPI00039626;IPI00719085;IPI00220935;IPI00515110	17	20.7
IPI00384689;IPI00645809;IPI00893057;IPI00908545;IPI00329208;IPI00384285;IPI00373856;IPI00915252	17	35.4
IPI00401264	17	51.2
IPI00411614;IPI00513835;IPI00879598	17	22.6
IPI00418262;IPI00792375;IPI00922081;IPI00922665;IPI00789171;IPI00218407;IPI00942961;IPI00513830;IPI00922373	17	43.7
IPI00419979;IPI00930214;IPI00926695;IPI00553222;IPI00896377;IPI00410084;IPI00289746;IPI00656138;IPI00027382;IPI00941059;IPI00555621	17	49.5
IPI00444452;IPI00646886;IPI00444454;IPI00843786	17	22.3
IPI00455473;IPI00739902;IPI00942436;IPI00929251;IPI00741107;IPI00655578	17	13.9
IPI00456925;IPI00947279	17	43.5
IPI00465132;IPI00399318;IPI00399319	17	79.2
IPI00552546;IPI00478758	17	32.7
IPI00554590;IPI00477068;IPI00945778	17	15.1
IPI00554742;IPI00855856;IPI00555572;IPI00908668;IPI00555743;IPI00910664	17	32.7
IPI00791613;IPI00646909;IPI00792478;IPI00952875	17	35.3
IPI00747748;IPI00179415;IPI00910825;IPI00877617;IPI00872489;IPI00413731;IPI00305491	17	37.8
IPI00926935;IPI00748145;IPI00925504;IPI00217906;IPI00925691;IPI00924427;IPI00794986;IPI00796250;IPI00398700;IPI00220281;IPI00248911;IPI00217269;IPI00645002;IPI00941962	17	53.8
IPI00748244	17	43.2
IPI00788837	17	86.2
IPI00794613;IPI00793999;IPI00154645;IPI00795659;IPI00945751;IPI00945555;IPI00945742	17	30.9
IPI00848090;IPI00908511;IPI00916783	17	58.6
IPI00903155	17	41.4
IPI00909703;IPI00414320;IPI00552303;IPI00465213;IPI00017337;IPI00940580	17	48.1
IPI00926625;IPI00941977;IPI00871311;IPI00926316;IPI00926534;IPI00924931;IPI00925876;IPI00658086	17	48.3
IPI00941167;IPI00027851;IPI00909914;IPI00910542	17	36.5
IPI00942294;IPI00011876;IPI00903024;IPI00915917;IPI00016626	17	66.4
CON__P15636	16	32.3
IPI00000643;IPI00657974;IPI00027028	16	72
IPI00000728;IPI00219504;IPI00219505;IPI00165116;IPI00796350;IPI00789575	16	24.9
IPI00000861;IPI00386803;IPI00952738;IPI00883946;IPI00909678;IPI00909481;IPI00909939;IPI00015157;IPI00418240	16	62.1
IPI00001676;IPI00290543	16	33.1
IPI00003881	16	54.9
IPI00005160;IPI00737530;IPI00927418;IPI00925033;IPI00924615;IPI00927612;IPI00927861;IPI00927206;IPI00925248;IPI00925800;IPI00924861	16	49.2
IPI00218187;IPI00005705	16	59.9
IPI00008438;IPI00749512;IPI00478810;IPI00025842;IPI00414852;IPI00398673;IPI00791589;IPI00816715;IPI00878854	16	80.6
IPI00008964;IPI00896425;IPI00374519;IPI00022134	16	77.1
IPI00009822;IPI00929464;IPI00736168	16	36.3
IPI00010810;IPI00895865;IPI00792673	16	68.2
IPI00011937;IPI00647280;IPI00639945;IPI00938009;IPI00640466	16	62.4
IPI00012303;IPI00943000;IPI00942368;IPI00954180;IPI00852768;IPI00852838;IPI00030385;IPI00853528;IPI00892906;IPI00952665;IPI00852953	16	41.2
IPI00012772;IPI00795138;IPI00797230;IPI00909884;IPI00792050;IPI00795853	16	59.5
IPI00014263;IPI00375127	16	60.5
IPI00014311;IPI00642151;IPI00647073;IPI00922263;IPI00643617	16	27.1
IPI00016342;IPI00945735;IPI00945574;IPI00947210;IPI00946911;IPI00945337;IPI00946776;IPI00945392;IPI00792578;IPI00791850;IPI00795370;IPI00375559;IPI00893506;IPI00922778;IPI00216364;IPI00216362;IPI00216366	16	73.9
IPI00016613;IPI00744507;IPI00741317;IPI00784195;IPI00472911	16	49.9
IPI00017763;IPI00941463;IPI00789437;IPI00798071;IPI00788840;IPI00790016	16	56.7
IPI00020602	16	58.6
IPI00020944;IPI00908715;IPI00797743;IPI00909973	16	45.8
IPI00021766;IPI00478442;IPI00477663;IPI00894213;IPI00894099;IPI00873380;IPI00219207	16	16.8
IPI00021840;IPI00643522;IPI00640929;IPI00382475	16	49.4
IPI00022048	16	21.3
IPI00022334	16	56.3
IPI00022827;IPI00247439	16	16.4
IPI00023122;IPI00023560;IPI00478185;IPI00060308;IPI00655883;IPI00030835	16	58.2
IPI00023704;IPI00797120;IPI00793907;IPI00926532;IPI00927168;IPI00927909;IPI00927466;IPI00927693;IPI00926750;IPI00924594;IPI00795660;IPI00794013	16	47.4
IPI00024642;IPI00743775	16	45.1
IPI00025890;IPI00852843;IPI00796935;IPI00797759	16	22.1
IPI00026314;IPI00647556;IPI00646773;IPI00796316;CON__Q3SX14;IPI00513782;IPI00641047;IPI00377087	16	26.2
IPI00027350;IPI00909207;IPI00794777;IPI00375401	16	70.2
IPI00027444;IPI00795490;IPI00006640;IPI00944915	16	56.2
IPI00027445;IPI00942264;IPI00941037;IPI00908759;IPI00910031;IPI00940266;IPI00909584;IPI00940811	16	30
IPI00027717;IPI00789740;IPI00789983;IPI00792828;IPI00908627	16	20.9
IPI00028006;IPI00844375	16	79.1
IPI00030702;IPI00909577;IPI00792971;IPI00921820	16	45.4
IPI00031131;IPI00791304;IPI00929530	16	51.2
IPI00031670	16	44.9
IPI00409684;IPI00031982;IPI00902825	16	16
IPI00037448;IPI00550682;IPI00514020;IPI00026486	16	62.8
IPI00070643;IPI00219265;IPI00937700;IPI00844032	16	28.6
IPI00099996;IPI00946039	16	46.2
IPI00100030;IPI00922696;IPI00401043;IPI00401041;IPI00922677;IPI00942773;IPI00385011	16	35.5
IPI00102069;IPI00909759	16	55.6
IPI00103483	16	35.7
IPI00104050	16	23
IPI00216047;IPI00150057;IPI00791331;IPI00789967;IPI00470387	16	20.3
IPI00152535;IPI00646871;IPI00445286;IPI00444866	16	9
IPI00159899;IPI00914539;IPI00375301;IPI00909909	16	22.6
IPI00162563;IPI00290648;IPI00377273;IPI00910246;IPI00442235	16	21.8
IPI00166749;IPI00939351;IPI00908803;IPI00442912	16	34.7
IPI00182938;IPI00872261;IPI00479201;IPI00441992;IPI00101645;IPI00908473;IPI00942978;IPI00945033;IPI00878976;IPI00945758;IPI00945285;IPI00910338;IPI00441948	16	35.5
IPI00183786;IPI00867558;IPI00023484	16	33.6
IPI00909064;IPI00184821;IPI00783178;IPI00909062	16	42.7
IPI00216057;IPI00922510	16	57.1
IPI00217056;IPI00938391;IPI00937542;IPI00444950;IPI00760934;IPI00908799	16	31.4
IPI00219575;IPI00794082	16	41.1
IPI00219757;IPI00793319;IPI00554769	16	68.6
IPI00646015;IPI00220710;IPI00921986;IPI00748985;IPI00945736;IPI00945678;IPI00639932;IPI00647609	16	41.1
IPI00942269;IPI00220901;IPI00926460;IPI00926241;IPI00926985;IPI00926756;IPI00552167	16	16.7
IPI00306667;IPI00220993;IPI00795036	16	43.2
IPI00290461;IPI00910728	16	73.6
IPI00797603;IPI00291578;IPI00924809;IPI00925025;IPI00925457;IPI00925704;IPI00925241	16	52.5
IPI00291928;IPI00646415	16	86
IPI00292894	16	25
IPI00297477;IPI00792607;IPI00797067;IPI00782963	16	62.7
IPI00297572;IPI00788633	16	13.5
IPI00298111;IPI00258833;IPI00910184;IPI00396025;IPI00480073;IPI00952842;IPI00555953;IPI00163718;IPI00555893;IPI00885014	16	39.7
IPI00299024;IPI00908521	16	70.9
IPI00299507;IPI00925237;IPI00924630;IPI00927291;IPI00926909;IPI00926197	16	28.1
IPI00301058	16	44.2
IPI00301311;IPI00896523;IPI00844040;IPI00917753;IPI00735319;IPI00942549;IPI00888355;IPI00887938;IPI00941150;IPI00880116	16	58.1
IPI00306516	16	36.7
IPI00646377;IPI00328268;IPI00874215;IPI00748864	16	10.5
IPI00329629;IPI00794610;IPI00796506	16	36.2
IPI00329672;IPI00736464;IPI00218638;IPI00939886;IPI00910866	16	20.4
IPI00384280;IPI00925564;IPI00924611;IPI00927939;IPI00927689	16	48.3
IPI00477040;IPI00385001;IPI00386622;IPI00945455;IPI00856092	16	13.6
IPI00395605;IPI00647786;IPI00339379;IPI00433169;IPI00643028;IPI00166711	16	24.7
IPI00396437;IPI00101968;IPI00925098;IPI00910949;IPI00924475;IPI00947133;IPI00925926;IPI00924873;IPI00925506;IPI00926332;IPI00924490;IPI00926516;IPI00926741;IPI00952997	16	43.6
IPI00397887	16	36.6
IPI00411426;IPI00656002	16	54.1
IPI00871854;IPI00412713	16	41.8
IPI00413451;IPI00749398;IPI00513699;IPI00793975	16	51.3
IPI00420108;IPI00954003	16	36.9
IPI00549232;IPI00456630;IPI00945165;IPI00945904;IPI00945320	16	18.9
IPI00465361;IPI00397611;IPI00909231	16	55.9
IPI00470528;IPI00790569;IPI00927715;IPI00926202;IPI00943200;IPI00909437;IPI00925058;IPI00874178;IPI00910417;IPI00062151;IPI00382749	16	54.9
IPI00470649;IPI00607732	16	35.5
IPI00470779	16	36.8
IPI00477118;IPI00843881;IPI00893778;IPI00893374;IPI00909345;IPI00183297;IPI00893519	16	29.6
IPI00479722;IPI00748256	16	64.3
IPI00549189;IPI00903276	16	25.3
IPI00550364	16	39.4
IPI00554541;IPI00556135;IPI00556506	16	47.8
IPI00604590;IPI00795292;IPI00026260;IPI00029091;IPI00790856;IPI00790982;IPI00797082;IPI00794728	16	71.2
IPI00642238;IPI00645339;IPI00646486;IPI00871239;IPI00878947;IPI00640417;IPI00448752;IPI00744429;IPI00877866	16	31.1
IPI00654777;IPI00941255;IPI00011177;IPI00375766	16	50
IPI00747764;IPI00413214;IPI00514894	16	35.5
IPI00908873	16	24.1
IPI00784651;IPI00926423;IPI00926079;IPI00926565;IPI00925955	16	32.9
IPI00000684;IPI00607787;IPI00217816;IPI00646967	15	38.5
IPI00002324;IPI00181717;IPI00845510;IPI00845294;IPI00921893;IPI00952989;IPI00845444	15	67.4
IPI00002372;IPI00908804;IPI00185503;IPI00884932	15	30.7
IPI00002519;IPI00220668;IPI00793862;IPI00220669;IPI00909750;IPI00796912;IPI00791841;IPI00008665	15	39.8
IPI00003815;IPI00794402;IPI00793767;IPI00797560;IPI00796541;IPI00797924;IPI00791180	15	86.3
IPI00003968;IPI00792728;IPI00797261;IPI00797098	15	54.6
IPI00004233;IPI00413173;IPI00844453	15	8.5
IPI00004358;IPI00789185	15	19.6
IPI00513827;IPI00895801;IPI00005040	15	42.1
IPI00005537;IPI00386010	15	44.1
IPI00005904	15	22.9
IPI00009123;IPI00922708;IPI00902923	15	44
IPI00009958;IPI00556139;IPI00791857;IPI00792995;IPI00791215	15	59.3
IPI00011201;IPI00643577;IPI00640765;IPI00643518	15	35.1
IPI00012069;IPI00619966;IPI00910902;IPI00619898	15	45.6
IPI00013004;IPI00418202;IPI00216320;IPI00791490;IPI00793433	15	76.3
IPI00013219;IPI00921075;IPI00922759;IPI00556543	15	37.6
IPI00927682;IPI00014235	15	25.3
IPI00015195;IPI00382661;IPI00651748	15	29.8
IPI00015911;IPI00926319;IPI00909143;IPI00926810;IPI00927039	15	32.2
IPI00020436;IPI00930720;IPI00429190;IPI00941638;IPI00795676;IPI00911020;IPI00027993	15	67.4
IPI00909772;IPI00022256;IPI00619900;IPI00937793;IPI00798379;IPI00790642;IPI00925072;IPI00924869;IPI00925403;IPI00925682;IPI00925212;IPI00925750	15	33.5
IPI00023344;IPI00413614;IPI00556574	15	19.9
IPI00023832;IPI00640092;IPI00400923	15	22.9
IPI00024175;IPI00218372;IPI00647380;IPI00847750;IPI00154509;IPI00748423;IPI00219950;IPI00646946	15	66.5
IPI00024719;IPI00651621;IPI00916606;IPI00916759	15	48.2
IPI00024971;IPI00940548;IPI00440762;IPI00442146;IPI00746936;IPI00878043;IPI00878237;IPI00877910;IPI00911080;IPI00877714;IPI00877892;IPI00878859;IPI00893681	15	23.5
IPI00025084;IPI00306986	15	78.4
IPI00025849;IPI00449263;IPI00940656;IPI00760940;IPI00916115;IPI00018262	15	43.8
IPI00026202;IPI00872093;IPI00847774;IPI00909746;IPI00878506	15	62.5
IPI00026969;IPI00473012;IPI00643072;IPI00641133	15	20
IPI00027180	15	35.4
IPI00027705;IPI00644817	15	36.7
IPI00028122;IPI00333317;IPI00643781	15	32.1
IPI00028277;IPI00641635;IPI00845501;IPI00845477;IPI00939501;IPI00945698;IPI00945989;IPI00845224	15	39.2
IPI00029469;IPI00917682	15	55.9
IPI00790214;IPI00029628;IPI00853306	15	60.6
IPI00030363;IPI00062003	15	51.3
IPI00031169;IPI00873632;IPI00794027;IPI00798089;IPI00790570;IPI00064352;IPI00794561;IPI00879279;IPI00448725	15	74.1
IPI00031836;IPI00877819;IPI00878823	15	48.8
IPI00910088;IPI00032516;IPI00910344;IPI00219794;IPI00002552	15	41.6
IPI00034277;IPI00218353;IPI00916512;IPI00954194;IPI00218354;IPI00383052	15	16.7
IPI00045839;IPI00163381;IPI00761114;IPI00916709;IPI00916562;IPI00644560	15	19.9
IPI00060715;IPI00002354;IPI00383585	15	53.5
IPI00141933;IPI00921844;IPI00952610;IPI00922915	15	22
IPI00147874;IPI00514997;IPI00514469;IPI00000567	15	59.9
IPI00151358;IPI00186429	15	34.9
IPI00419249;IPI00171199	15	55.7
IPI00178150;IPI00556059;IPI00930520;IPI00175193	15	14.6
IPI00397366;IPI00179172;IPI00397368;IPI00397367;IPI00794513;IPI00301689;IPI00302158;IPI00794935;IPI00871384	15	19
IPI00179438;IPI00954039;IPI00219298	15	29.6
IPI00215777;IPI00790115;IPI00022202;IPI00788624;IPI00793177;IPI00791315;IPI00792029	15	44
IPI00215884;IPI00218591;IPI00218592;IPI00922361	15	53.6
IPI00218831;IPI00647885;IPI00152326;IPI00640363;IPI00848002	15	71.1
IPI00219446;IPI00795288;IPI00908746;IPI00795701;IPI00940281;IPI00217976;IPI00939579;IPI00747283;IPI00025499;IPI00220175;IPI00220174;IPI00026836;IPI00220173;IPI00220171;IPI00293683;IPI00794584	15	86.6
IPI00290204;IPI00219483;IPI00219484;IPI00219485	15	42.1
IPI00219841;IPI00954188	15	20.8
IPI00251559;IPI00947211;IPI00946858;IPI00945996;IPI00945638	15	18.8
IPI00290435;IPI00216113;IPI00552801;IPI00645758;IPI00942912	15	27
IPI00400826;IPI00291262;IPI00795633;IPI00793848	15	30.9
IPI00291802	15	15.8
IPI00293126;IPI00798211	15	70.5
IPI00294398;IPI00298406;IPI00902588	15	73.2
IPI00646762;IPI00296913;IPI00646261;IPI00647797;IPI00644292;IPI00641064	15	67.2
IPI00297492	15	19.9
IPI00299095	15	35.3
IPI00913938;IPI00301107;IPI00917511;IPI00552710;IPI00916915	15	23.5
IPI00301109;IPI00470502;IPI00654717;IPI00470503;IPI00413014;IPI00749469;IPI00910509;IPI00470504	15	59
IPI00329573;IPI00302944;IPI00221384;IPI00941565	15	8.8
IPI00304417;IPI00304419;IPI00871304;IPI00844566;IPI00383639	15	46.3
IPI00304589;IPI00847646;IPI00384104	15	15.2
IPI00305289	15	20
IPI00556553;IPI00306748	15	33.3
IPI00307259;IPI00830029	15	9.6
IPI00827541;IPI00329545;IPI00166555;IPI00942458;IPI00646837;IPI00795335;IPI00032188	15	17.6
IPI00333068;IPI00909730;IPI00926706	15	49.7
IPI00334190;IPI00908723;IPI00442543	15	53.4
IPI00873459;IPI00926875;IPI00374970;IPI00927054;IPI00872036;IPI00921858;IPI00412153;IPI00927577;IPI00927824	15	37.3
IPI00384122	15	53.1
IPI00396321	15	55.7
IPI00409590;IPI00409591;IPI00409593;IPI00953316;IPI00952890;IPI00552510	15	12.2
IPI00409671;IPI00829889	15	23.1
IPI00413895;IPI00943357;IPI00921934;IPI00921970;IPI00739112;IPI00935647;IPI00868698;IPI00156651	15	27.6
IPI00414482;IPI00807491;IPI00874274	15	9
IPI00639841;IPI00419263;IPI00889037;IPI00947265;IPI00946181;IPI00946338;IPI00472856;IPI00945581	15	48.5
IPI00419856;IPI00409698;IPI00164417;IPI00903321	15	24
IPI00444371;IPI00872729;IPI00639995;IPI00909478;IPI00807730;IPI00747740	15	23.7
IPI00549725;IPI00453476;IPI00218570;IPI00374975;IPI00844133;IPI00930416;IPI00786897	15	76.4
IPI00465294;IPI00909093	15	31.9
IPI00473014;IPI00845388;IPI00935521;IPI00786968;IPI00888288;IPI00788232	15	75.8
IPI00478231;IPI00927114;IPI00926710;IPI00789934;IPI00926881;IPI00926466	15	66.3
IPI00479877	15	29.2
IPI00549248;IPI00220740;IPI00658013;IPI00604504;IPI00455423;IPI00879741;IPI00872901	15	62.2
IPI00551024;IPI00942691	15	40.5
IPI00940896;IPI00789627;IPI00797359;IPI00642409;IPI00790240;IPI00942604;IPI00789567;IPI00788914;IPI00657976;IPI00939887;IPI00914650	15	36.1
IPI00644297;IPI00645082;IPI00414819;IPI00946735;IPI00945125;IPI00909115	15	21.3
IPI00746777	15	39.6
IPI00747078	15	56.9
IPI00847689;IPI00784029;IPI00383665	15	57.2
IPI00828150;IPI00791573;IPI00001672	15	55.9
IPI00793375;IPI00645898;IPI00607814;IPI00643357;IPI00514564;IPI00642642;IPI00641670;IPI00644779	15	32.3
IPI00442171;IPI00880064;IPI00760871;IPI00619908;IPI00915800;IPI00916107;IPI00917679	15	30.4
IPI00914566;IPI00914971;IPI00902799;IPI00382869;IPI00455004	15	38.4
IPI00915022;IPI00158615;IPI00853065;IPI00894153;IPI00894557	15	11.7
IPI00921207;IPI00938417;IPI00375793;IPI00935150;IPI00910777	15	12.2
IPI00927892;IPI00289535;IPI00909134;IPI00924722;IPI00925183;IPI00926095	15	45
IPI00939839	15	27.5
IPI00550882;IPI00941557;IPI00376503;IPI00793698;IPI00922289;IPI00260769;IPI00902651;IPI00930393	15	60.4
CON__P08727;IPI00479145;IPI00794644;IPI00790191	14	39.5
IPI00000279;IPI00909823;IPI00927837;IPI00926769	14	31.8
IPI00909904;IPI00002212;IPI00640104;IPI00552426;IPI00641189	14	35.1
IPI00002349;IPI00828018	14	32.4
IPI00002408;IPI00448515;IPI00924947	14	27.7
IPI00002460;IPI00021771;IPI00953297	14	34.2
IPI00003128;IPI00182373;IPI00894468;IPI00657713;IPI00852618;IPI00853118;IPI00657829;IPI00657802;IPI00852922;IPI00852962;IPI00927141;IPI00852761	14	33.8
IPI00003479;IPI00874012;IPI00003431;IPI00010156	14	50.8
IPI00306380;IPI00003886;IPI00798037;IPI00929341;IPI00946884;IPI00789659;IPI00945015;IPI00790249	14	29.5
IPI00003923;IPI00914059;IPI00398067;IPI00913856;IPI00947553;IPI00913888;IPI00945224;IPI00945051;IPI00945920	14	41
IPI00003925;IPI00549885;IPI00798351;IPI00946404;IPI00947129;IPI00947319;IPI00555722	14	59.1
IPI00005260;IPI00783948;IPI00829629;IPI00894486;IPI00894476	14	12.5
IPI00005969;IPI00873484	14	75.2
IPI00008223;IPI00642549;IPI00643078	14	35.9
IPI00008433;IPI00555941	14	71.1
IPI00008557;IPI00179713;IPI00743914;IPI00180983;IPI00922167;IPI00953576;IPI00922068	14	29.1
IPI00009305;IPI00903190;IPI00922562	14	70.6
IPI00009315	14	36.4
IPI00009946;IPI00844363	14	53.7
IPI00010136;IPI00647506;IPI00010120	14	17.8
IPI00010201;IPI00937278;IPI00909562	14	46.3
IPI00010463;IPI00878100	14	35
IPI00010590;IPI00807455;IPI00807574;IPI00807597;IPI00941710;IPI00807726;IPI00807553;IPI00012073;IPI00807667;IPI00807698;IPI00807418	14	22.4
IPI00011229;IPI00853455;IPI00852597;IPI00879328;IPI00658053;IPI00892793	14	40
IPI00011916;IPI00940113;IPI00893993;IPI00893242;IPI00893909	14	61.9
IPI00908404;IPI00012102	14	29.3
IPI00013468;IPI00514701;IPI00644108;IPI00644568	14	61
IPI00013679;IPI00749113	14	56.3
IPI00014361;IPI00791788;IPI00909958	14	61.7
IPI00019755;IPI00642936;IPI00513927	14	47.3
IPI00019927	14	62.3
IPI00020021;IPI00909779;IPI00942944;IPI00425937	14	42.1
IPI00021466;IPI00943886;IPI00943824;IPI00455339;IPI00337775;IPI00386299	14	43.8
IPI00796864;IPI00641116;IPI00022018;IPI00790317	14	52.9
IPI00022629;IPI00399304;IPI00645623;IPI00942190;IPI00915034	14	31
IPI00022648;IPI00910936	14	32.3
IPI00022694;IPI00216247;IPI00853509;IPI00853609;IPI00419692;IPI00853415	14	52.3
IPI00025019;IPI00556291	14	64.7
IPI00025091;IPI00748962	14	65.2
IPI00025815;IPI00639819;IPI00910355;IPI00844544;IPI00868796;IPI00887615;IPI00887790;IPI00888108;IPI00647470	14	42.3
IPI00026182;IPI00873113;IPI00908400;IPI00852796;IPI00952611;IPI00853571;IPI00879381;IPI00893673	14	76.2
IPI00026848	14	38.9
IPI00026940;IPI00170581;IPI00889717;IPI00940742	14	45.5
IPI00027175;IPI00414264;IPI00946099;IPI00925997;IPI00925579;IPI00925325	14	56.1
IPI00027415;IPI00952925;IPI00217760;IPI00784170;IPI00922725;IPI00945848;IPI00946744	14	19.8
IPI00748472;IPI00029175	14	15.3
IPI00031556;IPI00830039	14	42.9
IPI00936352;IPI00032137;IPI00954154	14	15.1
IPI00032561	14	37.2
IPI00032826;IPI00954445;IPI00847961;IPI00892883;IPI00793211;IPI00218038;IPI00168839;IPI00892521;IPI00869264;IPI00936207;IPI00937732;IPI00892885	14	45.5
IPI00059279;IPI00655649	14	20.1
IPI00102059;IPI00062264;IPI00186969;IPI00788043;IPI00788089;IPI00908720	14	32.9
IPI00064767;IPI00829657;IPI00953554;IPI00830043;IPI00940971;IPI00386947;IPI00168527;IPI00829687;IPI00953516;IPI00910081;IPI00830020;IPI00166301;IPI00456744;IPI00010448;IPI00783816;IPI00444788;IPI00445123;IPI00456745;IPI00829821	14	23
IPI00095891;IPI00640867;IPI00514055;IPI00871191;IPI00644936;IPI00385033;IPI00788932;IPI00006395;IPI00329305;IPI00644474;IPI00792774;IPI00647637;IPI00006762;IPI00030939	14	14.6
IPI00100748;IPI00442503;IPI00953460	14	41.2
IPI00163849;IPI00942431;IPI00646339;IPI00645613;IPI00647324	14	23.8
IPI00165092	14	44.7
IPI00925217;IPI00168165;IPI00947423;IPI00947416;IPI00789331;IPI00167067;IPI00947231;IPI00946716;IPI00796485;IPI00927708;IPI00946874;IPI00790508	14	14.9
IPI00171626	14	33.5
IPI00477231;IPI00181391;IPI00941608;IPI00465449;IPI00640090;IPI00911066	14	22.1
IPI00183002;IPI00397728;IPI00939648;IPI00413191;IPI00397730;IPI00789895	14	18.1
IPI00215995;IPI00290043	14	16.8
IPI00216026;IPI00455531;IPI00917420;IPI00902560;IPI00737171;IPI00024145;IPI00888783;IPI00647902;IPI00647442;IPI00844015	14	57.8
IPI00218682;IPI00916535;IPI00009923	14	33.1
IPI00219604;IPI00797850	14	49.9
IPI00646491;IPI00219835	14	14.1
IPI00604523;IPI00220573;IPI00033494;IPI00719669;IPI00921274;IPI00642780	14	70.1
IPI00221108;IPI00642342;IPI00103732;IPI00103733;IPI00643685	14	52.4
IPI00221300;IPI00910969;IPI00783880;IPI00791918	14	52.1
IPI00289601;IPI00929375	14	34.4
IPI00292020	14	55.6
IPI00945940;IPI00292827;IPI00947554;IPI00911046;IPI00844141;IPI00760722;IPI00182383	14	40.9
IPI00386114;IPI00294627;IPI00941553;IPI00386117;IPI00386120;IPI00386118;IPI00386119;IPI00383251;IPI00945721;IPI00852591;IPI00917108	14	34.1
IPI00412898;IPI00301812	14	37
IPI00303318;IPI00789253;IPI00651701;IPI00006574	14	53.1
IPI00303568;IPI00947368;IPI00395565;IPI00514138	14	49.6
IPI00305833	14	36.5
IPI00797537;IPI00306398;IPI00789225	14	30.9
IPI00329536;IPI00941708	14	13
IPI00375015;IPI00793322;IPI00794545	14	83.5
IPI00375358;IPI00375359;IPI00940280	14	20
IPI00396411;IPI00107357	14	34.4
IPI00410666;IPI00425566;IPI00425560;IPI00425562;IPI00427739;IPI00427741	14	15.2
IPI00412344;IPI00290439;IPI00644437	14	27.6
IPI00413108;IPI00553164;IPI00927101;IPI00847766;IPI00793137;IPI00798361;IPI00790580;IPI00793905;IPI00942587;IPI00946437;IPI00399077;IPI00871515	14	59.3
IPI00419258;IPI00645948;IPI00644653;IPI00872915;IPI00943040;IPI00018755;IPI00742929;IPI00903004;IPI00886784;IPI00788220;IPI00737736;IPI00022796;IPI00879051;IPI00643746;IPI00418184	14	45.6
IPI00456728;IPI00026337;IPI00456729;IPI00874033;IPI00179121;IPI00922347	14	30.2
IPI00478410;IPI00395769	14	51.7
IPI00853598;IPI00375370;IPI00479141;IPI00789755;IPI00845335;IPI00556487;IPI00789169;IPI00795464;IPI00853116;IPI00794767;IPI00852657;IPI00791226;IPI00794434;IPI00852874	14	53.5
IPI00552073;IPI00789517;IPI00297178;IPI00894081;IPI00644906;IPI00292510;IPI00894447	14	17.6
IPI00925052;IPI00925334;IPI00554811;IPI00926054;IPI00607772;IPI00790262;IPI00926232;IPI00386354;IPI00924833;IPI00925522	14	65.8
IPI00748502;IPI00793277;IPI00902594;IPI00888408;IPI00795368	14	33.7
IPI00787009	14	31.5
IPI00787969;IPI00293568;IPI00916867;IPI00953150;IPI00100787	14	12.3
IPI00867509;IPI00943173;IPI00798401;IPI00797709	14	36.8
IPI00940386;IPI00396131	14	25.6
IPI00000948;IPI00927538;IPI00924474;IPI00926878	13	38.5
IPI00002270	13	48.1
IPI00003768;IPI00878536;IPI00554461;IPI00854683;IPI00879039;IPI00879274;IPI00465328;IPI00873098;IPI00445559	13	22.3
IPI00003783;IPI00795187	13	46
IPI00004472;IPI00397590;IPI00397592;IPI00397591	13	8.3
IPI00005087;IPI00014186;IPI00219003;IPI00002375;IPI00645850;IPI00872080	13	51.1
IPI00005202	13	52.2
IPI00006079;IPI00413671;IPI00413672;IPI00886854;IPI00886987;IPI00413673;IPI00922075	13	16.7
IPI00007694;IPI00412156;IPI00943255;IPI00921280	13	42.2
IPI00007722;IPI00942246;IPI00184670;IPI00215827;IPI00215826	13	14.3
IPI00007812;IPI00848320;IPI00304911;IPI00926751;IPI00925534;IPI00925827;IPI00792597;IPI00924887	13	41.1
IPI00009057;IPI00179890	13	35.9
IPI00012345;IPI00215879;IPI00556297;IPI00018203	13	33.7
IPI00012575	13	59
IPI00012912	13	29.5
IPI00890743;IPI00012970;IPI00890827;IPI00514237	13	40.9
IPI00013184;IPI00440719;IPI00793465;IPI00791664;IPI00853145;IPI00641919;IPI00644194;IPI00455623	13	71.9
IPI00013296;IPI00397609;IPI00790711;IPI00894147	13	65.1
IPI00013415;IPI00478287;IPI00893703;IPI00798077;IPI00796554;IPI00942012;IPI00797077	13	64.9
IPI00013788;IPI00644220;IPI00644724	13	22.4
IPI00014808	13	79.7
IPI00014938;IPI00795769;IPI00798360;IPI00844412;IPI00796857;IPI00797742	13	64.3
IPI00642369;IPI00015560;IPI00304246;IPI00909025;IPI00296893;IPI00289763;IPI00470701;IPI00641547;IPI00643466;IPI00647238;IPI00642346;IPI00645294	13	18.3
IPI00015836;IPI00794130;IPI00794687;IPI00945171	13	30.2
IPI00477982;IPI00017305;IPI00641051;IPI00513863;IPI00914890;IPI00893971;IPI00894093;IPI00827896;IPI00940467;IPI00788168;IPI00894030;IPI00514071;IPI00480046;IPI00027883;IPI00028932;IPI00853615;IPI00953450;IPI00815635;IPI00641573;IPI00902764;IPI00513934;IPI00515114	13	21.5
IPI00017412;IPI00218280;IPI00947280;IPI00945072;IPI00947452;IPI00944904;IPI00945248;IPI00947011;IPI00947438;IPI00946644	13	54
IPI00019169;IPI00644418;IPI00877928;IPI00880193	13	48.9
IPI00019269;IPI00789452;IPI00797907	13	59.3
IPI00020557;IPI00448904;IPI00032063;IPI00385568;IPI00797187;IPI00788728	13	4.1
IPI00021338;IPI00788836;IPI00908638	13	30.1
IPI00021518;IPI00446284;IPI00549348;IPI00607727;IPI00607674	13	34.9
IPI00021807;IPI00759616;IPI00845473;IPI00930466;IPI00940598;IPI00903033	13	28
IPI00022002;IPI00942760;IPI00909159	13	35
IPI00022215	13	16.6
IPI00023526;IPI00016891;IPI00946019;IPI00748927;IPI00945534;IPI00946870;IPI00946358;IPI00946537;IPI00001618	13	69.2
IPI00023673;IPI00902654;IPI00908762;IPI00796246;IPI00794873	13	29.9
IPI00023728	13	37.4
IPI00024097;IPI00216425;IPI00922094;IPI00945105;IPI00878833	13	34.4
IPI00024403;IPI00002657;IPI00295469;IPI00219842;IPI00219004;IPI00059186;IPI00793395;IPI00797798	13	23.6
IPI00024787;IPI00447606	13	31.5
IPI00024821;IPI00936088;IPI00915790	13	49.7
IPI00025277;IPI00930510;IPI00930049;IPI00930304	13	71.2
IPI00027434;IPI00647268;IPI00552834;IPI00643368;IPI00644425;IPI00000041	13	64.8
IPI00029133;IPI00456747;IPI00880198	13	52.7
IPI00029264	13	54.5
IPI00029534;IPI00556497	13	38.1
IPI00922855;IPI00029705;IPI00954088;IPI00384183	13	18
IPI00219445;IPI00030243;IPI00922362;IPI00795743	13	58.4
IPI00030851;IPI00785208	13	14.2
IPI00031681;IPI00260318;IPI00797954;IPI00910650;IPI00023503;IPI00925562	13	63.1
IPI00032003;IPI00552214;IPI00879203	13	68.1
IPI00032355;IPI00646054;IPI00941275;IPI00551014;IPI00941189;IPI00909786;IPI00911111;IPI00480122;IPI00939543;IPI00398749;IPI00022184;IPI00398750	13	12.5
IPI00032406	13	43
IPI00853009;IPI00034015;IPI00218389;IPI00218388;IPI00845479;IPI00410277;IPI00845480;IPI00952865;IPI00607544;IPI00853320;IPI00910773	13	28.3
IPI00100460;IPI00843782	13	30.2
IPI00107745;IPI00953314;IPI00448519;IPI00470619;IPI00030059	13	31
IPI00794956;IPI00165261;IPI00374338;IPI00940880	13	31.9
IPI00790530;IPI00171542;IPI00909193;IPI00909272;IPI00888760	13	27.3
IPI00177965;IPI00903275;IPI00514986;IPI00514738;IPI00747095	13	42.6
IPI00178440;IPI00164838;IPI00927696;IPI00927920;IPI00926585;IPI00924908	13	77.8
IPI00215914;IPI00215917;IPI00930263;IPI00930413;IPI00910783;IPI00797941;IPI00789027;IPI00947463;IPI00944969;IPI00888658	13	85.1
IPI00216691;CON__P02584	13	93.6
IPI00217013;IPI00479778;IPI00792955;IPI00384714;IPI00017290;IPI00793513;IPI00893355;IPI00942526;IPI00384531	13	22.2
IPI00217413	13	15.3
IPI00217540;IPI00456631	13	23.1
IPI00217943;IPI00030304;IPI00333133	13	69.2
IPI00642984;IPI00218200;IPI00641554;IPI00639976;IPI00646739;IPI00640444	13	27.2
IPI00218493;IPI00873466;IPI00477213;IPI00024644;IPI00645291	13	79.4
IPI00218693;IPI00642457;IPI00816267	13	75
IPI00220271;IPI00647702	13	51.4
IPI00220487;IPI00456049;IPI00792135;IPI00879809;IPI00888359;IPI00887091	13	78.9
IPI00221035;IPI00419473;IPI00258884;IPI00015945	13	65
IPI00240812;IPI00937545;IPI00845446;IPI00845459;IPI00845353;IPI00845253	13	12.2
IPI00257903;IPI00946242;IPI00441902	13	20.5
IPI00291946;IPI00941385;IPI00909971	13	22.3
IPI00292657;IPI00642248;IPI00164901;IPI00643630	13	50.8
IPI00293026;IPI00759768;IPI00878078;IPI00887069	13	15.7
IPI00654709;IPI00296183;IPI00796116;IPI00940201;IPI00795549;IPI00384883;IPI00796823	13	29.9
IPI00299033;IPI00643131	13	38.4
IPI00299155;IPI00789638;IPI00790207;IPI00795606;IPI00792218;IPI00791083;IPI00159969;IPI00816561;IPI00816510	13	60.9
IPI00397229;IPI00872746;IPI00397230;IPI00299412;IPI00909812	13	22.4
IPI00300333;IPI00384593;IPI00908865	13	34.5
IPI00301936;IPI00940851;IPI00644008;IPI00513758;IPI00607677;IPI00479625;IPI00643012;IPI00943170;IPI00644588;IPI00395507;IPI00902494;IPI00030250;IPI00219967;IPI00184721	13	45
IPI00304435;IPI00893815;IPI00894014;IPI00894205	13	58.5
IPI00306046;IPI00399105	13	34.2
IPI00306604	13	18.3
IPI00926581;IPI00941217;IPI00607818;IPI00337335;IPI00607778;IPI00029818	13	5.8
IPI00514648;IPI00386718;IPI00640353	13	9.4
IPI00386755;IPI00872773;IPI00429633;IPI00480093	13	37
IPI00387130;IPI00025333;IPI00908414;IPI00513770;IPI00878389	13	52.9
IPI00396058;IPI00797030;IPI00917442;IPI00871611;IPI00916797;IPI00909559	13	15.9
IPI00396279;IPI00744551;IPI00915353;IPI00828013;IPI00926355;IPI00927744;IPI00926566;IPI00927083;IPI00930129	13	12
IPI00411706;IPI00641040;IPI00645836	13	67
IPI00413324;IPI00478208;IPI00644171;IPI00394699;IPI00642149;IPI00878444;IPI00874214;IPI00455067;IPI00922647;IPI00844321	13	58.7
IPI00413344;IPI00893115	13	80.7
IPI00419844;IPI00916833;IPI00916761;IPI00916869;IPI00917733;IPI00917974;IPI00927463	13	27.8
IPI00427330;IPI00926999;IPI00925603;IPI00926792;IPI00647254	13	43.2
IPI00455599	13	22.5
IPI00465308;IPI00554703	13	33
IPI00470610;IPI00747534;IPI00642541;IPI00335061;IPI00514380	13	55.6
IPI00472939;IPI00452747	13	58.4
IPI00477468	13	16.1
IPI00604527;IPI00018632;IPI00640970;IPI00514039;IPI00910189	13	25.6
IPI00619921;IPI00249982;IPI00183350;IPI00249984	13	9.5
IPI00641924	13	38.6
IPI00792352;IPI00795671;IPI00643041;IPI00796462;IPI00795109;IPI00044779;IPI00792120;IPI00794138	13	47
IPI00719600;IPI00789699	13	12.1
IPI00944536;IPI00743859;IPI00385055;IPI00916487;IPI00916353	13	15.1
IPI00871988;IPI00942178;IPI00793874	13	53.2
IPI00847300	13	52.6
IPI00871686;IPI00945554	13	17
IPI00874074;IPI00744575	13	5.4
IPI00925804;IPI00953925;IPI00939349	13	43.8
CON__P12763;IPI00022431;IPI00953689;IPI00795830;IPI00922262	12	45.7
IPI00001883;IPI00873809;IPI00744897	12	32.8
IPI00002857;IPI00221141;IPI00945296;IPI00221143;IPI00221142;IPI00946109;IPI00945931	12	52.5
IPI00002922;IPI00922336;IPI00640917;IPI00218132;IPI00020873;IPI00925198;IPI00792325;IPI00926545;IPI00926848;IPI00926594;IPI00927791;IPI00927546;IPI00927137;IPI00924550;IPI00924818;IPI00954226;IPI00926628	12	31.7
IPI00003348;IPI00925530;IPI00790302;IPI00790896;IPI00797969;IPI00924758;IPI00029143;IPI00386304	12	52.1
IPI00003438	12	58.9
IPI00022887;IPI00003635;IPI00953445;IPI00916582;IPI00021763;IPI00916999;IPI00916451	12	48.6
IPI00003704;IPI00908491;IPI00556034;IPI00940890	12	38.5
IPI00003833	12	48.2
IPI00006034;IPI00921911	12	69.7
IPI00006092;IPI00294903;IPI00879431	12	53.7
IPI00006615;IPI00216192;IPI00910365	12	22.9
IPI00006932;IPI00216804;IPI00893216;IPI00927709	12	26.2
IPI00007611;IPI00789135;IPI00853134;IPI00893479	12	61.5
IPI00007940;IPI00936931;IPI00879747	12	36.2
IPI00008219	12	50.1
IPI00008380;IPI00815784	12	57
IPI00008998;IPI00938044;IPI00787433	12	35.9
IPI00009268;IPI00940464;IPI00945211;IPI00788719;IPI00791053;IPI00947447;IPI00792542;IPI00946958	12	31.1
IPI00009680	12	36.7
IPI00009906	12	44.1
IPI00010346;IPI00025564;IPI00872224	12	19.3
IPI00011592;IPI00909090;IPI00909455;IPI00470463	12	36.8
IPI00012490;IPI00217171;IPI00217169;IPI00217170;IPI00217164;IPI00217165;IPI00217166;IPI00217168	12	13.5
IPI00013466;IPI00910220	12	52.6
IPI00290945;IPI00014958;IPI00844348;IPI00925904	12	66.1
IPI00015361;IPI00030303;IPI00792988;IPI00791925;IPI00028183;IPI00793611	12	77.9
IPI00015944;IPI00921867;IPI00921883;IPI00550611;IPI00334011;IPI00004582	12	20.7
IPI00015954;IPI00513941;IPI00644667	12	78.8
IPI00016112;IPI00791587;IPI00952632;IPI00894357;IPI00888304	12	12.4
IPI00016513	12	52.5
IPI00016702;IPI00942440;IPI00856033;IPI00855799;IPI00844221;IPI00386898;IPI00953348;IPI00465119;IPI00641910;IPI00646639;IPI00006648;IPI00383812;IPI00909744;IPI00893657	12	14.2
IPI00017256;IPI00847168;IPI00478433;IPI00377066;IPI00457006	12	52.3
IPI00017381;IPI00925945;IPI00792595;IPI00924613;IPI00925397;IPI00795756;IPI00925227;IPI00924737;IPI00927827;IPI00925652	12	46.3
IPI00640817;IPI00018342;IPI00515036;IPI00743623;IPI00844054;IPI00943762	12	62.4
IPI00019733;IPI00797295;IPI00794643	12	56.2
IPI00020508;IPI00178861	12	24.7
IPI00021327;IPI00792746;IPI00218070;IPI00790124	12	58.5
IPI00021537;IPI00216130;IPI00642693;IPI00449112;IPI00937682	12	27
IPI00024911;IPI00873931;IPI00654800	12	47.1
IPI00024933;IPI00816063;IPI00868816;IPI00878862	12	70.9
IPI00024993	12	47.2
IPI00025796	12	53.8
IPI00025974;IPI00171424;IPI00060414	12	72.8
IPI00436632;IPI00026466;IPI00436634	12	6.3
IPI00026942;IPI00793890;IPI00384365;IPI00386655;IPI00795129	12	47.5
IPI00027009;IPI00221111;IPI00879955;IPI00877624	12	38.1
IPI00027378;IPI00396563;IPI00910402	12	57.2
IPI00027745;IPI00927883;IPI00219516;IPI00924795;IPI00747397;IPI00938207;IPI00940500;IPI00940179;IPI00924575;IPI00930475	12	23.2
IPI00027808;IPI00873948;IPI00894355;IPI00894141	12	15.1
IPI00028481;IPI00909683;IPI00556414;IPI00790414;IPI00903040;IPI00789827;IPI00061114;IPI00871276;IPI00300562;IPI00394882;IPI00383449	12	46.9
IPI00028888;IPI00220684;IPI00220683;IPI00220685;IPI00903278;IPI00915340	12	37.2
IPI00029159;IPI00940798;IPI00218853	12	25.3
IPI00029444;IPI00797519;IPI00796944	12	41.2
IPI00029623;IPI00867679;IPI00888766	12	62.6
IPI00029997;IPI00643842	12	70.5
IPI00936284;IPI00030357;IPI00219558;IPI00947116	12	50
IPI00030847;IPI00644458	12	23.4
IPI00031514;IPI00373883;IPI00925306;IPI00908568;IPI00924976	12	49.4
IPI00294779;IPI00031804	12	50.4
IPI00065500;IPI00922787;IPI00644855	12	34.5
IPI00065671;IPI00908603;IPI00607810;IPI00902890;IPI00027771;IPI00644228	12	63.6
IPI00916768;IPI00075248;IPI00916600;IPI00794543;IPI00386621;IPI00945782;IPI00915959;IPI00216984;IPI00219796;IPI00646205	12	67.9
IPI00106491;IPI00908451	12	52.3
IPI00152540;IPI00795801;IPI00788676;IPI00795327	12	12.9
IPI00152998	12	29.6
IPI00154975;IPI00014718	12	46.9
IPI00396258;IPI00181135;IPI00788925	12	43.1
IPI00182126;IPI00922428;IPI00878142;IPI00645860;IPI00953596	12	26.1
IPI00215767;IPI00759755	12	50
IPI00215780	12	65.5
IPI00215918;IPI00946929;IPI00792330	12	80
IPI00216048;IPI00791944	12	51.1
IPI00871284;IPI00941331;IPI00644857;IPI00744597;IPI00216139;IPI00550119;IPI00376992	12	27.4
IPI00744015;IPI00302712;IPI00915993;IPI00216348;IPI00827859;IPI00827813;IPI00917978;IPI00412601;IPI00917180;IPI00917325;IPI00915884;IPI00917685;IPI00917785;IPI00916160;IPI00917564;IPI00917075;IPI00916278;IPI00916306	12	31.2
IPI00218288;IPI00747830	12	14.4
IPI00219097	12	55.5
IPI00219219;IPI00880148	12	74.8
IPI00219301	12	66
IPI00219344;IPI00470800;IPI00219103;IPI00395510;IPI00894533;IPI00555920;IPI00894381	12	70.5
IPI00220362;IPI00916763;IPI00414878;IPI00916345;IPI00935986;IPI00935211;IPI00938042;IPI00942644	12	81.4
IPI00220578	12	40.7
IPI00220648	12	57.3
IPI00290085;IPI00658202;IPI00853291;IPI00788754;IPI00789821;IPI00024034;IPI00916622	12	24.4
IPI00291200;IPI00514905;IPI00641510	12	17.4
IPI00893197;IPI00293102;IPI00935879;IPI00217296;IPI00910771;IPI00217297;IPI00941236;IPI00852637;IPI00640101;IPI00470813;IPI00853351;IPI00853207;IPI00925818;IPI00880122;IPI00927771;IPI00853294;IPI00925006	12	42.1
IPI00293350;IPI00937434;IPI00647395;IPI00844588	12	54.1
IPI00294158;IPI00925847;IPI00926066	12	47.6
IPI00294911	12	39.6
IPI00301364;IPI00172421;IPI00788011;IPI00719311	12	87.1
IPI00301489;IPI00514944;IPI00514662;IPI00909873;IPI00909757;IPI00885017	12	49.6
IPI00642032;IPI00305692;IPI00644318	12	49.2
IPI00399265;IPI00399267;IPI00306825;IPI00743469	12	69
IPI00307017;IPI00942137;IPI00221240;IPI00221241	12	16.8
IPI00329583;IPI00890715;IPI00890727	12	23.3
IPI00335168;IPI00796366;IPI00789605;IPI00930599;IPI00795576;IPI00793089;IPI00413922;IPI00797626;IPI00796500;IPI00795944;IPI00909366;IPI00027255;IPI00101961;IPI00792530	12	86.8
IPI00337397;IPI00953181;IPI00216688;IPI00006038;IPI00797307;IPI00337395;IPI00936708;IPI00337396	12	9.1
IPI00411623;IPI00374054;IPI00646954;IPI00749432;IPI00783772;IPI00640474	12	33
IPI00375631	12	73.9
IPI00376119;IPI00645788;IPI00738231;IPI00737155;IPI00395654;IPI00739595;IPI00739094;IPI00877619;IPI00514131;IPI00414365;IPI00889699;IPI00643790;IPI00644248;IPI00889718;IPI00889577;IPI00940146	12	32.4
IPI00383046	12	46.1
IPI00411680;IPI00947458;IPI00922359;IPI00946967;IPI00946965;IPI00945092;IPI00945247;IPI00945422	12	65.2
IPI00376005;IPI00411704;IPI00855924;IPI00006935;IPI00946642;IPI00946502;IPI00945644	12	71.2
IPI00419585;IPI00910407;IPI00925747;IPI00925411;IPI00939576;IPI00030144;IPI00455871;IPI00937169;IPI00787316;IPI00886744;IPI00657716;IPI00376170;IPI00935692;IPI00248321;IPI00479480;IPI00938414;IPI00879182	12	72.1
IPI00425409;IPI00425404;IPI00425405;IPI00425407;IPI00644778	12	10.4
IPI00465256;IPI00910240;IPI00478236	12	64.8
IPI00478657;IPI00954479;IPI00940450;IPI00914953	12	37.3
IPI00549467;IPI00945908;IPI00791300;IPI00790618	12	62.7
IPI00550069	12	32.5
IPI00954006;IPI00550308;IPI00954190;IPI00644692;IPI00852629;IPI00852859	12	14.6
IPI00220014;IPI00645307;IPI00953196;IPI00640997;IPI00018740	12	53.9
IPI00742670;IPI00924709	12	62.4
IPI00828189	12	50
IPI00856045;IPI00884904;IPI00885105	12	10.5
IPI00902614;IPI00914628	12	6.1
IPI00000581;IPI00939174;IPI00409750	12	59.7
IPI00942312	12	35.7
CON__P10096;IPI00022430;IPI00879148	11	35.7
CON__P15497	11	51.3
IPI00002335	11	5.8
IPI00002496;IPI00030920;IPI00797050	11	38
IPI00002557;IPI00877609	11	16.8
IPI00003168;IPI00942171;IPI00796213;IPI00789576;IPI00795423;IPI00788900;IPI00445190;IPI00789022;IPI00798249	11	39
IPI00003217;IPI00514549;IPI00908513	11	53.4
IPI00003327	11	70.3
IPI00003588;IPI00913838	11	68.4
IPI00005102;IPI00643452;IPI00642393;IPI00909795	11	46.2
IPI00005270	11	27.3
IPI00007058;IPI00908316;IPI00867659;IPI00795736;IPI00255836	11	30.1
IPI00007926;IPI00395835	11	66.7
IPI00008207;IPI00383856;IPI00924917;IPI00470859;IPI00854698;IPI00556490	11	21.7
IPI00008248;IPI00939488;IPI00915282;IPI00945732	11	23.2
IPI00008575;IPI00479209;IPI00385834;IPI00082310;IPI00166708;IPI00903310	11	30.9
IPI00008728	11	27
IPI00010414	11	60.5
IPI00010415;IPI00395748;IPI00219451;IPI00219452;IPI00746126;IPI00395469;IPI00883762;IPI00445888	11	38.9
IPI00375531;IPI00012048;IPI00791971	11	73.4
IPI00012578;IPI00946316	11	34.2
IPI00012835;IPI00554626	11	30.7
IPI00013256;IPI00607841;IPI00909622;IPI00902991	11	28.6
IPI00013774;IPI00514649;IPI00910637	11	27.8
IPI00013860;IPI00915850;IPI00879284	11	44.3
IPI00014053;IPI00376117;IPI00847576	11	43.8
IPI00015806;IPI00411594;IPI00916091;IPI00917026;IPI00917018	11	19.9
IPI00016339;IPI00789439;IPI00797838;IPI00927292;IPI00927919;IPI00063302;IPI00002919	11	68.5
IPI00016568;IPI00738805	11	66.4
IPI00016703;IPI00922928;IPI00922718;IPI00647760	11	27.1
IPI00909484;IPI00016786;IPI00910473;IPI00007189;IPI00642590;IPI00012511;IPI00027952;IPI00249526;IPI00877816;IPI00880127	11	51.3
IPI00017704	11	78.9
IPI00017963;IPI00930678;IPI00040897;IPI00742239	11	71.2
IPI00018120;IPI00910684	11	37.4
IPI00922443;IPI00018402;IPI00922576;IPI00414657;IPI00872454	11	25.3
IPI00019463;IPI00385404;IPI00807398;IPI00892809	11	30.1
IPI00021258;IPI00216520;IPI00744919;IPI00910325	11	45
IPI00021266;IPI00789159;IPI00793523;IPI00794894;IPI00176755;IPI00788093;IPI00787625;IPI00604435	11	51.9
IPI00021370;IPI00019894;IPI00910176;IPI00878126	11	81.5
IPI00021634;IPI00793613;IPI00793175;IPI00791952;IPI00887742	11	25.6
IPI00251749;IPI00022282;IPI00759700;IPI00604725;IPI00219946;IPI00759729;IPI00555880;IPI00604604	11	20.6
IPI00023101;IPI00922574;IPI00063902;IPI00926084;IPI00926472	11	43.8
IPI00024143;IPI00747361;IPI00793524;IPI00792670;IPI00794723;IPI00791584	11	38.1
IPI00024915;IPI00759663;IPI00375306;IPI00375307	11	57
IPI00024934	11	17.3
IPI00025239;IPI00946334	11	30.2
IPI00026320;IPI00741894;IPI00935432	11	6.8
IPI00027681	11	51.9
IPI00027831;IPI00847896;IPI00909965	11	36.8
IPI00027838	11	31.2
IPI00028004;IPI00788896;IPI00789577	11	58
IPI00029046;IPI00798088	11	39.7
IPI00910030;IPI00409582;IPI00169401;IPI00029515;IPI00409583;IPI00940562;IPI00409581;IPI00788930;IPI00789621	11	15.3
IPI00029557;IPI00909181	11	55.8
IPI00030207;IPI00642048	11	33.6
IPI00030915;IPI00941811;IPI00872245;IPI00952731	11	13.7
IPI00031357;IPI00953119;IPI00917087;IPI00909598	11	27.9
IPI00031521;IPI00373882;IPI00940107	11	34
IPI00742677;IPI00065486;IPI00893833;IPI00746222	11	20.2
IPI00099550;IPI00071180;IPI00878595	11	29
IPI00101734	11	33.2
IPI00106646;IPI00009794;IPI00514755;IPI00930709;IPI00930668;IPI00930387	11	42.3
IPI00106698	11	37.7
IPI00150269;IPI00218435	11	27.4
IPI00607554;IPI00165528;IPI00023584;IPI00607731	11	11.4
IPI00166153;IPI00514387;IPI00514843;IPI00514419	11	21.4
IPI00168479;IPI00941988;IPI00848298;IPI00514157;IPI00448169	11	41.4
IPI00174025;IPI00873922;IPI00480148	11	10.9
IPI00513791;IPI00815633;IPI00183572;IPI00815886;IPI00807434;IPI00816106;IPI00043678	11	6.6
IPI00215768	11	26.2
IPI00215919;IPI00853337;IPI00909515	11	80
IPI00815707;IPI00217442;IPI00797397;IPI00798060;IPI00556571;IPI00410680;IPI00871927;IPI00654628;IPI00790296;IPI00793474;IPI00797665;IPI00798374	11	6.7
IPI00217766;IPI00909338	11	32.4
IPI00396630;IPI00217960;IPI00922246	11	29.1
IPI00218466;IPI00941172;IPI00414427;IPI00182313;IPI00414428;IPI00640481;IPI00604476;IPI00643500;IPI00647854;IPI00792005;IPI00647396;IPI00935795;IPI00644876;IPI00946233;IPI00854697;IPI00640009	11	17.6
IPI00219622;IPI00927830;IPI00925799;IPI00924522	11	62.4
IPI00219910;IPI00783862	11	67.1
IPI00220739;IPI00922847	11	62.1
IPI00221089	11	51.7
IPI00221092;IPI00397701;IPI00450975	11	58.9
IPI00399266;IPI00399268;IPI00221178	11	68.4
IPI00221222;IPI00930562;IPI00455831	11	63.8
IPI00257882;IPI00910514;IPI00909399	11	27
IPI00291669	11	36.8
IPI00291922	11	56.4
IPI00292000;IPI00657721;IPI00738596;IPI00167198;IPI00939863;IPI00657783;IPI00657750	11	37.1
IPI00335449;IPI00874039;IPI00294178;IPI00939356;IPI00910814;IPI00909011	11	23.7
IPI00797038;IPI00294380;IPI00384116;IPI00292709;IPI00909475	11	22.8
IPI00294501	11	22.5
IPI00294739;IPI00943982;IPI00553034	11	22.2
IPI00295209;IPI00922618;IPI00513893;IPI00515089;IPI00386781	11	28.7
IPI00297261	11	34.9
IPI00297579;IPI00917509;IPI00917646;IPI00869133	11	65
IPI00298991;IPI00952870;IPI00164930	11	14.9
IPI00604773;IPI00299116;IPI00926421	11	24.6
IPI00301323;IPI00555700;IPI00657846	11	23.9
IPI00303292;IPI00945733;IPI00796516;IPI00790454;IPI00946369;IPI00642306	11	26.2
IPI00304232;IPI00926172	11	38.3
IPI00328161;IPI00640341;IPI00947340	11	32.7
IPI00329572;IPI00909672	11	32.8
IPI00337415;IPI00925531;IPI00925310;IPI00925068	11	33.1
IPI00339269;IPI00011134	11	15.4
IPI00385042;IPI00645138	11	24.6
IPI00399089;IPI00796904	11	50.9
IPI00418497;IPI00656071	11	29.2
IPI00419373;IPI00939124;IPI00927677;IPI00455134;IPI00909208;IPI00927407;IPI00940369;IPI00470658;IPI00927189;IPI00926389;IPI00927894	11	36.8
IPI00419802;IPI00377161;IPI00915760;IPI00871204;IPI00916393;IPI00916098;IPI00915922;IPI00916207;IPI00916849	11	31.9
IPI00855767;IPI00607591;IPI00855727;IPI00619924;IPI00856100;IPI00424869	11	21.1
IPI00429689;IPI00796774	11	52.8
IPI00438170;IPI00743822;IPI00844112	11	66.9
IPI00442821	11	26.3
IPI00443909;IPI00793081;IPI00790734;IPI00383952;IPI00792424;IPI00789541	11	64.8
IPI00465045;IPI00643040;IPI00335362;IPI00335360;IPI00410130;IPI00017734	11	11
IPI00470883;IPI00552978;IPI00641720;IPI00947236;IPI00642251;IPI00640203;IPI00647430;IPI00852883	11	11.5
IPI00477355	11	31.7
IPI00465054;IPI00550243	11	35.1
IPI00915356;IPI00550821;IPI00719106;IPI00927669;IPI00927882;IPI00926271;IPI00926462;IPI00921501	11	29
IPI00550968;IPI00930346;IPI00409675;IPI00797308;IPI00946472;IPI00945421;IPI00001955	11	44.3
IPI00604624;IPI00873590;IPI00451430;IPI00451429;IPI00917949;IPI00916550;IPI00916417	11	35.3
IPI00646917;IPI00552186;IPI00743966	11	49.3
IPI00658145;IPI00172590;IPI00953618;IPI00797616	11	17.2
IPI00740934;IPI00936239;IPI00418121;IPI00219798;IPI00418122;IPI00946477;IPI00829739;IPI00939730;IPI00941618;IPI00946336;IPI00896492;IPI00945364;IPI00900311;IPI00385980;IPI00420043;IPI00952993;IPI00947476;IPI00556355	11	11
IPI00784233;IPI00916509;IPI00916026;IPI00647635;IPI00916904;IPI00910765;IPI00917756;IPI00856036;IPI00917502;IPI00917620;IPI00916261;IPI00916150;IPI00915973;IPI00917031;IPI00916290;IPI00917083	11	12.7
IPI00952680;IPI00787827;IPI00908889;IPI00219613;IPI00552829;IPI00552238;IPI00470936;IPI00553109	11	18.2
IPI00871704;IPI00942390;IPI00789805;IPI00936715;IPI00794752;IPI00791213;IPI00855715;IPI00791794;IPI00747250;IPI00655865	11	11.7
IPI00793199;IPI00872780	11	39.9
IPI00815770;IPI00552276;IPI00216508;IPI00029740	11	72.8
IPI00845432;IPI00431405;IPI00654793	11	32.4
IPI00940039;IPI00440688;IPI00440689;IPI00878135;IPI00877685;IPI00429180;IPI00908753	11	36.6
IPI00943562	11	35.3
IPI00952583;IPI00916551;IPI00916676;IPI00917560	11	57.2
CON__Q3SX09;IPI00884107;IPI00654755;CON__P02070;IPI00796636;IPI00940370;IPI00473011;IPI00657660;IPI00829896;IPI00749035;IPI00744503;IPI00939160;IPI00939544;IPI00554676;IPI00220706;IPI00217471;IPI00657911;IPI00791558;IPI00930351;IPI00853641;IPI00815947	10	51.7
IPI00399307;IPI00001593	10	26.5
IPI00001661;IPI00787306;IPI00747309;IPI00925791;IPI00926548;IPI00925317;IPI00927389;IPI00925570;IPI00029521;IPI00647413	10	31.9
IPI00002149	10	56.6
IPI00514424;IPI00002412;IPI00514248;IPI00908718;IPI00514996	10	37
IPI00002790;IPI00555723	10	22.2
IPI00003176;IPI00902529;IPI00643586	10	36.5
IPI00003269	10	19.7
IPI00003627;IPI00216622;IPI00792088;IPI00007776;IPI00945240;IPI00790197;IPI00944907;IPI00793214	10	39.9
IPI00003848;IPI00645574	10	32.3
IPI00871870;IPI00005162;IPI00794982;IPI00796102;IPI00797967	10	56.7
IPI00005578	10	31.2
IPI00005707	10	10.6
IPI00005948;IPI00184525	10	38.2
IPI00006157;IPI00642320;IPI00644714;IPI00643151;IPI00646652;IPI00643588	10	36.2
IPI00006211;IPI00216174;IPI00443658;IPI00910004;IPI00748221	10	46.1
IPI00006408;IPI00910915	10	45.5
IPI00007346;IPI00643915;IPI00645020;IPI00644363;IPI00902819;IPI00935462;IPI00748376;IPI00645494	10	76.3
IPI00007423;IPI00759824;IPI00647001;IPI00290834;IPI00237334;IPI00930163;IPI00032864;IPI00887411;IPI00307214;IPI00645753	10	46.2
IPI00007676;IPI00788741	10	38.5
IPI00007764;IPI00447316;IPI00384857;IPI00917313	10	75.3
IPI00007797;IPI00737213;IPI00788781;IPI00869087	10	77.8
IPI00008167;IPI00787965;IPI00946353;IPI00788784;IPI00789521;IPI00793333;IPI00952896;IPI00945216;IPI00945384;IPI00946024	10	38
IPI00008708;IPI00642046	10	25.7
IPI00009659;IPI00797536;IPI00639985	10	48.2
IPI00009771;IPI00879819	10	17.3
IPI00009943;IPI00550900;IPI00643765;IPI00908553;IPI00910288;IPI00410496;IPI00886965;IPI00888198;IPI00384863;IPI00012453	10	62.8
IPI00010130;IPI00942956	10	28.4
IPI00219675;IPI00010271;IPI00394837;IPI00023138;IPI00010270;IPI00877663;IPI00790187;IPI00879948;IPI00878066;IPI00555566	10	46
IPI00011284;IPI00375513;IPI00878254;IPI00878855;IPI00880186;IPI00878765	10	53.5
IPI00012197	10	80
IPI00012202;IPI00908660;IPI00647794;IPI00909184	10	42.1
IPI00012773;IPI00879374;IPI00879166;IPI00215764;IPI00879971;IPI00879521	10	15.9
IPI00013744	10	11.4
IPI00646500;IPI00647667;IPI00013939;IPI00646957;IPI00642145	10	46.9
IPI00014174;IPI00645503;IPI00646810;IPI00645275;IPI00644869;IPI00645843	10	43.4
IPI00014197;IPI00798278;IPI00795684;IPI00793920;IPI00794676;IPI00479935;IPI00795163	10	67.8
IPI00014533;IPI00220833;IPI00384556	10	12.6
IPI00015102;IPI00944977;IPI00807403;IPI00791964;IPI00795504;IPI00945338;IPI00748835	10	22
IPI00910593;IPI00015262;IPI00910272;IPI00398735;IPI00021264	10	35.5
IPI00926903;IPI00015833;IPI00926408;IPI00927150;IPI00921826;IPI00927721	10	37.1
IPI00015905;IPI00646511;IPI00645362;IPI00647528;IPI00644896	10	52.9
IPI00016077;IPI00925757;IPI00926531;IPI00925073;IPI00926887;IPI00926675	10	46.5
IPI00927646;IPI00927399;IPI00016589;IPI00853489;IPI00797161;IPI00789672;IPI00796756;IPI00797914;IPI00384611;IPI00654743;IPI00941767;IPI00908478	10	11
IPI00017341	10	27.4
IPI00018415;IPI00902914	10	17
IPI00018871;IPI00940959;IPI00789069;IPI00793455	10	32.8
IPI00019472;IPI00922776;IPI00922487	10	26.6
IPI00397947;IPI00890717;IPI00019599;IPI00030962;IPI00447356;IPI00472498;IPI00514724;IPI00007847;IPI00872898	10	27.3
IPI00019600;IPI00789287;IPI00797889	10	69.7
IPI00020991	10	25.3
IPI00216260;IPI00021016;IPI00910455;IPI00916739;IPI00916152;IPI00917718	10	43.4
IPI00021985;IPI00885106;IPI00908580;IPI00909581;IPI00445136	10	18.8
IPI00549434;IPI00658216;IPI00658185;IPI00022082;IPI00658113;IPI00479741;IPI00941473;IPI00787280;IPI00893987;IPI00925967;IPI00927728;IPI00925741	10	28.8
IPI00022314;IPI00847322;IPI00607577;IPI00911015	10	66.2
IPI00022810;IPI00872258;IPI00941964;IPI00171323;IPI00872443	10	26.6
IPI00023086;IPI00914032	10	35.5
IPI00023510;IPI00927674;IPI00924852	10	62.3
IPI00023542	10	44.7
IPI00023860;IPI00789029;IPI00797545;IPI00922322;IPI00902909	10	37.1
IPI00024279;IPI00641437;IPI00552253	10	6
IPI00024467;IPI00844263	10	9.8
IPI00024773;IPI00746455;IPI00952786;IPI00553014;IPI00418590	10	14.7
IPI00024816;IPI00026448;IPI00555826;IPI00031927;IPI00024627;IPI00915899;IPI00917262;IPI00918012;IPI00917883;IPI00740171;IPI00917411;IPI00917584	10	60.5
IPI00024975;IPI00889513;IPI00479255;IPI00952789;IPI00791497;IPI00794555;IPI00927235	10	10
IPI00444329;IPI00910865;IPI00025100;IPI00944561;IPI00470386	10	29.6
IPI00025616;IPI00925787;IPI00909525;IPI00927870;IPI00927382;IPI00927214;IPI00926735;IPI00925651	10	27.7
IPI00026268;IPI00639998;IPI00640462;IPI00640949;IPI00642117	10	38.2
IPI00026519;IPI00552916;IPI00657779;IPI00073603	10	64.3
IPI00026964;IPI00889196	10	42.3
IPI00028055;IPI00911085	10	40.6
IPI00028083	10	37.6
IPI00028911	10	17
IPI00029697;IPI00654592;IPI00845426;IPI00607722	10	30.7
IPI00029731;IPI00793102;IPI00926288;IPI00926495;IPI00879894	10	58.2
IPI00029744;IPI00922415;IPI00946606;IPI00947310	10	64.2
IPI00029754;IPI00927918;IPI00924824;IPI00742734;IPI00783078;IPI00783524;IPI00953541;IPI00794020;IPI00879654;IPI00877937;IPI00795638;IPI00924469;IPI00924431;IPI00927923;IPI00927925	10	19
IPI00030098;IPI00877867	10	33
IPI00030782;IPI00792907	10	14.6
IPI00031564;IPI00917299;IPI00916612;IPI00903238;IPI00917449;IPI00020301;IPI00916717	10	69.7
IPI00031691;IPI00795717;IPI00910195;IPI00909133;IPI00795310;IPI00719047;IPI00878105	10	65.6
IPI00031708;IPI00793664;IPI00794773;IPI00794247	10	33.2
IPI00033143	10	56
IPI00043598;IPI00401792	10	32.6
IPI00059242	10	32.4
IPI00059292;IPI00219306;IPI00745029;IPI00513955;IPI00797788;IPI00789807;IPI00872105;IPI00869105	10	70.3
IPI00060627	10	44.4
IPI00069084;IPI00925034;IPI00879277;IPI00926412	10	3.4
IPI00555744;IPI00069693;IPI00925323;IPI00815843;IPI00943013	10	30
IPI00072044;IPI00761072;IPI00061507;IPI00760666	10	40
IPI00101186;IPI00294794;IPI00940901	10	10.6
IPI00107728;IPI00909793	10	17.7
IPI00143753;IPI00829908;IPI00790699;IPI00791877;IPI00788772;IPI00945586;IPI00945148;IPI00945497;IPI00944988;IPI00945524	10	13.2
IPI00163230;IPI00924791;IPI00924636;IPI00925574;IPI00909067	10	43.4
IPI00165393;IPI00640833;IPI00910661;IPI00514333;IPI00910423;IPI00514758	10	48.9
IPI00798102;IPI00184284;IPI00170796;IPI00789072;IPI00791280	10	48.2
IPI00217354;IPI00175169;IPI00449160;IPI00922590	10	41.5
IPI00179330;IPI00798127;IPI00792712;IPI00793729;IPI00789107;IPI00719280;IPI00790633;IPI00794925;IPI00795527;IPI00793810;IPI00797400;IPI00796600;IPI00794211;IPI00796007;IPI00784990;IPI00789823;IPI00456429;IPI00793330;IPI00798155;IPI00654754;IPI00792139;IPI00794205;IPI00418813;IPI00936175;IPI00937730;IPI00879555;IPI00248597	10	59.6
IPI00181728	10	35.4
IPI00182533;IPI00914529;IPI00910727;IPI00816097;IPI00914543;IPI00879950	10	60.6
IPI00186966;IPI00395680;IPI00220996;IPI00220997;IPI00220587;IPI00220998;IPI00329733;IPI00221000;IPI00220999;IPI00220586;IPI00221001;IPI00922028;IPI00305486;IPI00386245;IPI00550792;IPI00795778;IPI00797365	10	22.8
IPI00215719;IPI00908950	10	38.8
IPI00216237;IPI00942147;IPI00872941	10	46.7
IPI00014587;IPI00790571;IPI00945731;IPI00216393;IPI00946844	10	31
IPI00216719;IPI00374976;IPI00171230;IPI00181684;IPI00216720;IPI00472614;IPI00946991	10	9.9
IPI00217357;IPI00939119	10	12.5
IPI00218130;IPI00657751;IPI00909513	10	11.6
IPI00219038;IPI00171611;IPI00909530;IPI00944603;IPI00944521;IPI00216402;IPI00419884;IPI00477080;IPI00793280;IPI00942498;IPI00235724;IPI00930262;IPI00942150;IPI00792719	10	56.6
IPI00872940;IPI00219156;IPI00794121;IPI00794745;IPI00790695	10	79.1
IPI00219682;IPI00377081;IPI00910709	10	51.7
IPI00220342;IPI00910124	10	36.5
IPI00220766	10	66.8
IPI00221091;IPI00744832;IPI00156232	10	66.9
IPI00221093;IPI00791157;IPI00478114;IPI00797968;IPI00878027	10	63
IPI00260715;IPI00221354;IPI00941083;IPI00645208;IPI00909890;IPI00428056;IPI00854677	10	24.6
IPI00247583;IPI00940766;IPI00845507;IPI00879165;IPI00397713;IPI00942479;IPI00399374;IPI00878451;IPI00942755	10	50
IPI00923582;IPI00289862;IPI00657698;IPI00909070;IPI00917523;IPI00917645;IPI00908505;IPI00917232;IPI00917382	10	25.3
IPI00292496;IPI00514047;IPI00945532;IPI00018511	10	25
IPI00292975	10	12.9
IPI00294159;IPI00852927	10	31.5
IPI00294211;IPI00909589	10	10.8
IPI00294402;IPI00910327;IPI00374747;IPI00908798	10	17.7
IPI00294619;IPI00788849;IPI00297452;IPI00952872;IPI00790804;IPI00790186;IPI00797644	10	38.2
IPI00294891;IPI00654555;IPI00872909;IPI00798219;IPI00797590	10	16.7
IPI00296259;IPI00953634;IPI00914891;IPI00914908;IPI00879204;IPI00925777	10	42.3
IPI00296353;IPI00760924	10	23.2
IPI00305064;IPI00828117;IPI00827658;IPI00827650;IPI00418465;IPI00828064;IPI00828192;IPI00827795;IPI00828056;IPI00419219;IPI00827893;IPI00827982;IPI00827937;IPI00854669;IPI00297160;IPI00922478;IPI00918020;IPI00827555;IPI00828108;IPI00954073	10	13.2
IPI00298558;IPI00946434;IPI00945696;IPI00944895;IPI00791474;IPI00947286;IPI00790953;IPI00792914;IPI00792092;IPI00793567;IPI00793671	10	51.4
IPI00299048;IPI00871809;IPI00871709	10	8.6
IPI00299465;IPI00478250;IPI00924468;IPI00925155;IPI00793317;IPI00924698;IPI00791972	10	38.1
IPI00916822;IPI00300952;IPI00032473;IPI00916407;IPI00909552;IPI00917407;IPI00384234;IPI00916666	10	64.4
IPI00302740;IPI00643830	10	33.5
IPI00304163	10	41.2
IPI00328748;IPI00924819;IPI00927651	10	38.5
IPI00328815;IPI00786950;IPI00787034;IPI00748485;IPI00414817;IPI00787461	10	14.5
IPI00329605	10	13.5
IPI00334713;IPI00334587;IPI00742926;IPI00106509;IPI00329355	10	39.6
IPI00339384;IPI00339385;IPI00910248;IPI00163384	10	37.1
IPI00375527;IPI00856084;IPI00442268;IPI00644730;IPI00940243;IPI00916697;IPI00945779;IPI00916378;IPI00647813;IPI00944992;IPI00946122;IPI00945331;IPI00945952	10	23
IPI00376199;IPI00889619;IPI00911008;IPI00646970	10	33.9
IPI00376394;IPI00514219	10	21.5
IPI00927658;IPI00395998;IPI00927458;IPI00927543;IPI00794734;IPI00927895;IPI00878895;IPI00878360;IPI00878577;IPI00926827;IPI00797214	10	46.4
IPI00397695	10	48.4
IPI00409659;IPI00909004;IPI00908495	10	22.8
IPI00410079;IPI00845345;IPI00446735	10	27
IPI00410214;IPI00410215;IPI00953320;IPI00910437	10	48.4
IPI00412224;IPI00943071;IPI00908722	10	13.5
IPI00887273;IPI00413140;IPI00888758;IPI00816287;IPI00657691	10	12.2
IPI00414717;IPI00923461;IPI00641153;IPI00647145	10	10.9
IPI00796919;IPI00441344;IPI00927191;IPI00441550;IPI00797646;IPI00925197;IPI00926027;IPI00925615	10	18.9
IPI00442073;IPI00921301	10	64.2
IPI00453473	10	61.2
IPI00465070;IPI00784001	10	56.6
IPI00465211;IPI00937835;IPI00916920;IPI00917487;IPI00027464;IPI00917915;IPI00065088;IPI00065432;IPI00917784	10	18.3
IPI00465238;IPI00952729;IPI00872797	10	15.6
IPI00477763	10	10.1
IPI00479058	10	75.9
IPI00644708;IPI00005615;IPI00647436;IPI00940524;IPI00646522;IPI00909906	10	37
IPI00789848;IPI00645805;IPI00929108;IPI00946851;IPI00791221	10	25.4
IPI00747787	10	10.8
IPI00783118;IPI00945729;IPI00009662;IPI00100938;IPI00783682;IPI00795164;IPI00945239;IPI00947366;IPI00791633;IPI00797435;IPI00795820	10	32.1
IPI00784020;IPI00783186;IPI00909867;IPI00868922;IPI00251783;IPI00953250;IPI00871529	10	5.3
IPI00783835;IPI00793009;IPI00793666;IPI00942336	10	10
IPI00790441	10	36.8
IPI00797136;IPI00896464	10	32.3
IPI00827930;IPI00181911;IPI00645852;IPI00645305;IPI00647722;IPI00644436	10	19.7
IPI00844214;IPI00472981;IPI00645320;IPI00789216	10	21
IPI00902542	10	34.5
IPI00908985	10	37.6
IPI00916391	10	64.1
IPI00940685;IPI00006723;IPI00385642	10	50.4
CON__P19001	9	19.6
CON__Q3ZBD7	9	22.8
IPI00000811;IPI00789119;IPI00796198	9	46.9
IPI00001738	9	22
IPI00001757;IPI00216659;IPI00383083	9	77.6
IPI00456008;IPI00002521;IPI00794158	9	51.7
IPI00871903;IPI00002624;IPI00382756;IPI00921981	9	29
IPI00003326;IPI00908403;IPI00847722	9	51.1
IPI00003565;IPI00027699;IPI00552190;IPI00183104;IPI00647839	9	60.2
IPI00003831;IPI00219258;IPI00219256;IPI00219259;IPI00219257;IPI00219260;IPI00219261;IPI00219262;IPI00219293;IPI00219294;IPI00219295;IPI00795696;IPI00642992	9	8.4
IPI00003927	9	24.1
IPI00003944;IPI00644810	9	23.9
IPI00003949;IPI00874051;IPI00796342;IPI00376844;IPI00796917	9	76.3
IPI00004838;IPI00399054	9	47.7
IPI00004839	9	47.2
IPI00005605;IPI00218503;IPI00218504;IPI00644290;IPI00879739;IPI00514909;IPI00644702;IPI00008994;IPI00910928;IPI00218109;IPI00008269;IPI00218108;IPI00382995;IPI00745722;IPI00759789;IPI00472607;IPI00217784;IPI00384121	9	36.3
IPI00005657;IPI00639894	9	62.8
IPI00005861;IPI00377152;IPI00909797	9	22.5
IPI00005978;IPI00796848;IPI00385786;IPI00746575;IPI00902967;IPI00477842;IPI00856075;IPI00894320;IPI00739666	9	37.1
IPI00005979;IPI00654843;IPI00220232;IPI00908922;IPI00893055;IPI00892585;IPI00556659	9	26.8
IPI00006379;IPI00924866	9	22.7
IPI00006666;IPI00789599;IPI00790189;IPI00793490	9	23.7
IPI00006713;IPI00166730	9	27
IPI00007144	9	48.3
IPI00007334;IPI00946415;IPI00911038;IPI00215975;IPI00297991	9	11
IPI00007426;IPI00908696;IPI00909717;IPI00945943;IPI00946721;IPI00946450	9	32.4
IPI00007814;IPI00873237;IPI00789054	9	29.8
IPI00008454;IPI00927297;IPI00797108	9	38.8
IPI00008569;IPI00927850;IPI00909691;IPI00924927	9	55.1
IPI00008770;IPI00470739;IPI00619967;IPI00644555	9	51.4
IPI00009922	9	69.7
IPI00010090	9	37.6
IPI00010153;IPI00795408;IPI00791920;IPI00795751;IPI00794091	9	65.7
IPI00010700;IPI00893120;IPI00894143;IPI00642817;IPI00953633;IPI00942384;IPI00942936;IPI00084746;IPI00943318;IPI00941514;IPI00942314;IPI00893641;IPI00844237;IPI00941272;IPI00940401;IPI00943144;IPI00939397;IPI00952705;IPI00940875;IPI00940155;IPI00854786;IPI00940543;IPI00939969;IPI00885161;IPI00941298;IPI00940175	9	7.5
IPI00011307;IPI00743626;IPI00878287;IPI00916740;IPI00915768;IPI00927816;IPI00746020	9	34
IPI00011631	9	14.6
IPI00219825;IPI00012503;IPI00744835;IPI00873020;IPI00873201;IPI00556640	9	17
IPI00013297;IPI00926884	9	47.5
IPI00853454;IPI00013976;IPI00852737;IPI00852733	9	7.5
IPI00016373;IPI00877662;IPI00941177	9	46.8
IPI00016608;IPI00797864;IPI00909375	9	44.8
IPI00383849;IPI00016736;IPI00745182	9	10.6
IPI00016868;IPI00903289	9	15.9
IPI00017344;IPI00908835	9	47.9
IPI00017469;IPI00909276	9	50.6
IPI00017669;IPI00470489;IPI00794957;IPI00796698;IPI00793699;IPI00798328	9	22.6
IPI00018627;IPI00793985;IPI00945622;IPI00470922;IPI00952974;IPI00946830;IPI00946268;IPI00947437;IPI00946447	9	49.7
IPI00018768;IPI00917623;IPI00916061;IPI00922875	9	46.9
IPI00018946;IPI00939845;IPI00910339	9	14.7
IPI00018963;IPI00922277;IPI00386908	9	34.1
IPI00876864;IPI00019196;IPI00478229;IPI00941057;IPI00911058;IPI00641692	9	40.1
IPI00021570;IPI00640567;IPI00006362	9	52.7
IPI00640525;IPI00641157;IPI00021794;IPI00643801	9	19.7
IPI00021924	9	38.5
IPI00022542;IPI00641659;IPI00644878;IPI00640910;IPI00645351	9	7.3
IPI00022649;IPI00220844	9	11.7
IPI00023161;IPI00798240;IPI00797533;IPI00796428;IPI00383092;IPI00795938;IPI00797042	9	47.3
IPI00759542;IPI00759754;IPI00023283;IPI00179357;IPI00759637;IPI00759613;IPI00952748;IPI00375499;IPI00375498;IPI00455173	9	0.2
IPI00023640;IPI00908931;IPI00654798	9	67.2
IPI00024006;IPI00796832;IPI00790120	9	7.2
IPI00386516;IPI00939709;IPI00024660;IPI00420088;IPI00643007;IPI00908693;IPI00909013	9	41.4
IPI00024802	9	6.7
IPI00024919;IPI00374151	9	43
IPI00394668;IPI00394665;IPI00025057;IPI00025058;IPI00760588	9	9.7
IPI00025156;IPI00645380	9	32.3
IPI00025347;IPI00790725;IPI00792804;IPI00794141	9	41
IPI00025818;IPI00292550;IPI00791020;IPI00455152;IPI00916025	9	16.8
IPI00026105;IPI00943320;IPI00479934;IPI00909685;IPI00479311	9	14.1
IPI00026328	9	66.9
IPI00026813;IPI00607601;IPI00845384;IPI00789666	9	35.1
IPI00026824	9	37
IPI00027270;IPI00433834;IPI00789514;IPI00939745;IPI00792420;IPI00790553;IPI00552470;IPI00455174;IPI00872953	9	48.3
IPI00908416;IPI00027485;IPI00873680;IPI00788723;IPI00852709	9	40.3
IPI00027704;IPI00793754;IPI00792711;IPI00795023	9	27.9
IPI00028931	9	14.8
IPI00029054;IPI00902778;IPI00642843;IPI00552464	9	21.9
IPI00029267	9	50.2
IPI00029400;IPI00219866	9	27.6
IPI00031627	9	7.2
IPI00032139	9	29.5
IPI00033600;IPI00893539;IPI00395771;IPI00893764;IPI00894184;IPI00759705;IPI00893943;IPI00759816;IPI00893774;IPI00893379;IPI00893238	9	32.8
IPI00045946;IPI00099529;IPI00513860;IPI00844240;IPI00645379	9	16.7
IPI00063762	9	44.5
IPI00100313;IPI00941197;IPI00478550;IPI00395420;IPI00072541	9	21.2
IPI00100197;IPI00397571;IPI00022830;IPI00376904;IPI00443534	9	31.1
IPI00657888;IPI00101782;IPI00383767;IPI00657652;IPI00893044;IPI00910336	9	24.5
IPI00102896;IPI00943589;IPI00433806	9	46.3
IPI00103525;IPI00395775	9	18.7
IPI00152695;IPI00877677;IPI00797468;IPI00233495	9	31.9
IPI00303868;IPI00157144;IPI00877630	9	17.4
IPI00162330;IPI00335130;IPI00395764	9	25.5
IPI00165026;IPI00395872;IPI00658081;IPI00878625	9	23.1
IPI00165357;IPI00917955;IPI00220288;IPI00879783;IPI00880118;IPI00877659;IPI00877838	9	16.5
IPI00167368	9	9.3
IPI00760837;IPI00167572	9	29.1
IPI00168878	9	27.9
IPI00658155;IPI00169413;IPI00845406	9	52.4
IPI00170972;IPI00647890;IPI00643582	9	37.2
IPI00171412;IPI00942652;IPI00784010;IPI00334514;IPI00926529;IPI00783919;IPI00926177;IPI00942954;IPI00924919;IPI00334513;IPI00783351;IPI00927565;IPI00939930;IPI00334516;IPI00910862;IPI00926849;IPI00953012;IPI00925106	9	31.2
IPI00171573;IPI00185975	9	35.3
IPI00172656	9	22
IPI00176903;IPI00514023;IPI00513773	9	38.7
IPI00177008	9	39.6
IPI00183208;IPI00554605;IPI00169168	9	30.5
IPI00215893;IPI00877645	9	45.8
IPI00216682;IPI00909623;IPI00642542	9	43.8
IPI00464979;IPI00217232;IPI00514217;IPI00513883	9	23.3
IPI00217236;IPI00909626	9	57.4
IPI00217686	9	15.6
IPI00218775;IPI00556067;IPI00443474	9	23.9
IPI00219677;IPI00789397;IPI00791500;IPI00792937	9	37.4
IPI00219861;IPI00759646;IPI00893203;IPI00218847;IPI00952677;IPI00410615;IPI00936586;IPI00935343;IPI00382703;IPI00892543	9	58.9
IPI00219953;IPI00908752;IPI00514929;IPI00514049;IPI00909419	9	51.3
IPI00872375;IPI00220194;IPI00909237;IPI00641837;IPI00640593;IPI00641086	9	12.2
IPI00220278;IPI00030929;IPI00376572;IPI00888438;IPI00925836;IPI00165428;IPI00293380;IPI00216798;IPI00847724;IPI00647211	9	50.6
IPI00220906;IPI00513928;IPI00930396;IPI00922628	9	26.1
IPI00307334;IPI00221302;IPI00889777	9	21.4
IPI00641436;IPI00895844;IPI00221332;IPI00480085;IPI00914615	9	12.4
IPI00843759;IPI00221345;IPI00953665;IPI00414899	9	20.9
IPI00239077;IPI00039639	9	83.3
IPI00289807;IPI00953549;IPI00301719;IPI00925330;IPI00927685;IPI00921077;IPI00305221	9	25.3
IPI00291608;IPI00796456;IPI00060650;IPI00790305;IPI00604582;IPI00879617	9	48.9
IPI00910194;IPI00292059	9	11.5
IPI00292499	9	27.7
IPI00293434;IPI00790432;IPI00878369;IPI00942616;IPI00788736;IPI00789296	9	67.6
IPI00294455	9	17.4
IPI00297714;IPI00883944;IPI00643394	9	81.9
IPI00298281	9	9.3
IPI00298738;IPI00911060;IPI00847921;IPI00879323	9	11
IPI00646058;IPI00300631;IPI00942963;IPI00925702;IPI00005648;IPI00872777;IPI00942551;IPI00941773	9	16.5
IPI00301419;IPI00798179;IPI00902665	9	44.7
IPI00555647;IPI00301503;IPI00472633;IPI00927500;IPI00927271;IPI00927262;IPI00793887;IPI00789389	9	31.5
IPI00303832;IPI00783965	9	13.9
IPI00305469	9	72.5
IPI00328154;IPI00375533;IPI00917001;IPI00945816;IPI00796261	9	31.7
IPI00328200;IPI00791466	9	19.3
IPI00329598;IPI00418769	9	37.7
IPI00465290;IPI00333016;IPI00607744;IPI00477887;IPI00027984	9	23.6
IPI00333838	9	29.9
IPI00334159	9	45.5
IPI00335385	9	32.6
IPI00336016;IPI00954440	9	17.2
IPI00339381;IPI00953643;IPI00759790;IPI00790749	9	13.7
IPI00382958	9	49.4
IPI00396387;IPI00384745;IPI00479495;IPI00908311;IPI00892665;IPI00893424;IPI00942020;IPI00943277	9	19.1
IPI00942266;IPI00385034;IPI00398293;IPI00645815	9	33.1
IPI00868973;IPI00386206;IPI00744319;IPI00217053;IPI00868764;IPI00942375;IPI00868717	9	24.3
IPI00394788	9	13.4
IPI00395887;IPI00908319	9	33.6
IPI00411639;IPI00745789;IPI00952784;IPI00871717;IPI00795137;IPI00868885	9	40
IPI00412147;IPI00101335	9	18
IPI00465428;IPI00797358;IPI00412216;IPI00942695;IPI00604778	9	4.6
IPI00412771	9	18.9
IPI00639957;IPI00412880;IPI00514607	9	24.3
IPI00414127;IPI00878075;IPI00878611;IPI00399212;IPI00879666;IPI00878950;IPI00879160;IPI00878440;IPI00943883;IPI00646187;IPI00643303;IPI00032472;IPI00878795	9	65.2
IPI00414442;IPI00018780;IPI00187145;IPI00792261	9	23.2
IPI00419235;IPI00642432;IPI00444582	9	39.7
IPI00448751;IPI00854700;IPI00921922;IPI00854856;IPI00922178;IPI00854567;IPI00921857	9	19.4
IPI00465160;IPI00784776;IPI00925546;IPI00796877;IPI00794398;IPI00796248;IPI00793766;IPI00925118	9	16.1
IPI00465315;IPI00917605;IPI00176698;CON__P62894;IPI00943180	9	63.8
IPI00465431	9	32.4
IPI00477971;IPI00643087;IPI00549223	9	16.1
IPI00657953;IPI00479523;IPI00943984;IPI00943836;IPI00384882	9	3.2
IPI00479997;IPI00921996;IPI00643115;IPI00642012;IPI00744618;IPI00922311;IPI00922779;IPI00216921;IPI00789196;IPI00006572	9	54.4
IPI00514622	9	9.2
IPI00549381	9	31.4
IPI00873116;IPI00549566;IPI00514101	9	18
IPI00550234;IPI00007280;IPI00640779;IPI00903330;IPI00450866	9	71.5
IPI00553153;IPI00377040;IPI00258804	9	35.5
IPI00555876	9	20.7
IPI00873344;IPI00941154;IPI00619958;IPI00619951;IPI00896474;IPI00796527	9	51.2
IPI00641582;IPI00639961	9	27.8
IPI00642798	9	19.7
IPI00645410;IPI00646098	9	15.5
IPI00654810;IPI00915967	9	5.7
IPI00657687;IPI00743594;IPI00032958;IPI00926956;IPI00926483	9	12.9
IPI00743104	9	11
IPI00745793;IPI00294696	9	25.2
IPI00792788;IPI00746684;IPI00816677;IPI00917443	9	6.5
IPI00747849;IPI00871221	9	34.3
IPI00784044;IPI00789428;IPI00903225	9	20.2
IPI00790498	9	65
IPI00790634;IPI00305092;IPI00914992	9	69
IPI00797574;IPI00873213	9	4.3
IPI00945566	9	21.2
IPI00000051	8	68
IPI00000070;IPI00908663	8	12.6
IPI00000858;IPI00941607;IPI00941723;IPI00921016;IPI00922214;IPI00793755;IPI00946182;IPI00154408;IPI00642023;IPI00946689	8	24.3
IPI00001458;IPI00795298	8	4.7
IPI00002070	8	13
IPI00924788;IPI00002230;IPI00925612;IPI00790972	8	26.3
IPI00002483	8	28
IPI00002564;IPI00911037;IPI00880055;IPI00879881	8	16.7
IPI00003933;IPI00745553;IPI00909928	8	40.3
IPI00004970;IPI00929268	8	3.9
IPI00005715;IPI00941018;IPI00555735;IPI00655534;IPI00217042	8	11.2
IPI00005792;IPI00414963;IPI00942797;IPI00375983;IPI00854628	8	43.5
IPI00006052	8	63
IPI00006176;IPI00939822;IPI00916785	8	14.2
IPI00006579;IPI00645361	8	39.1
IPI00006715;IPI00903016;IPI00916789	8	20.8
IPI00006970	8	20.4
IPI00006987;IPI00923556;IPI00911118;IPI00910382;IPI00000207	8	13.5
IPI00007404;IPI00479911;IPI00925029;IPI00909500;IPI00924928;IPI00926067;IPI00925593;IPI00926490;IPI00926766;IPI00924557;IPI00925374;IPI00926965;IPI00793782;IPI00926888;IPI00925219;IPI00796939	8	16.8
IPI00007755;IPI00790578	8	44.4
IPI00007811;IPI00790969;IPI00059926	8	34.7
IPI00008986;IPI00643866;IPI00549477;IPI00910358	8	16.8
IPI00010105;IPI00375391;IPI00640731;IPI00893107;IPI00893507;IPI00892804	8	48.6
IPI00010204;IPI00843996	8	40.2
IPI00010438;IPI00216231;IPI00795000;IPI00794966;IPI00796942;IPI00794436;IPI00795513	8	52.1
IPI00011511;IPI00299177;IPI00902875	8	21
IPI00011913	8	41
IPI00795627;IPI00012353;IPI00791539;IPI00793817;IPI00794965	8	27.5
IPI00012382;IPI00909847	8	40.4
IPI00012451;IPI00946201;IPI00946384;IPI00791560	8	27.6
IPI00012756;IPI00908843	8	16
IPI00030654;IPI00012998;IPI00647126;IPI00910864;IPI00797184	8	18.9
IPI00013174;IPI00556514;IPI00954234;IPI00644837	8	16.3
IPI00013895	8	80
IPI00013917;IPI00157456	8	70.5
IPI00014198;IPI00796470;IPI00792783	8	29.9
IPI00014230;IPI00796075;IPI00796630	8	59.6
IPI00014377;IPI00939888;IPI00027981;IPI00024775	8	47.1
IPI00014439;IPI00902534	8	50.4
IPI00015029;IPI00908647;IPI00789101;IPI00789698;IPI00790462;IPI00910575;IPI00910005	8	55
IPI00015148;IPI00796349;IPI00908754;IPI00412525;IPI00942831;IPI00816182;IPI00940725	8	51.1
IPI00015285;IPI00795358	8	30.8
IPI00015736;IPI00791004;IPI00383579;IPI00946703;IPI00945700;IPI00945538	8	30.7
IPI00217277;IPI00015920;IPI00790325	8	36.1
IPI00954530;IPI00016405;IPI00816523;IPI00816371	8	44
IPI00016669;IPI00947020;IPI00945356;IPI00945139	8	39.7
IPI00017448;IPI00387084;IPI00937239;IPI00396086;IPI00387085	8	75.9
IPI00018009	8	27
IPI00019146;IPI00874147;IPI00607658;IPI00103423;IPI00383114	8	31.8
IPI00019345;IPI00877120	8	51.1
IPI00019640	8	25.3
IPI00218019;IPI00019906;IPI00394877;IPI00908477	8	31.9
IPI00020928;IPI00643708;IPI00644515	8	27.2
IPI00909773;IPI00021347;IPI00909975	8	49.5
IPI00021828	8	83.7
IPI00022254;IPI00449201;IPI00946557;IPI00790600	8	37.6
IPI00896504;IPI00023162;IPI00867674;IPI00922266	8	15.7
IPI00023334;IPI00107137	8	38.3
IPI00023406	8	42.9
IPI00023591	8	33.9
IPI00024062;IPI00644651;IPI00646198;IPI00646661;IPI00641968;IPI00640846;IPI00384975;IPI00647602;IPI00647777	8	14.9
[truncated: 2,755 more rows]
