# Supplementary material
Source: publisher figshare collection journal article supplement (https://acs.figshare.com/ndownloader/files/4161244)
Supplement: Supplementary file 1 [file 4161244 › Supplementary Table 2.pdf]

# Supplementary Table 2A: Percentage of MS/MS identified

|                                                             | 1 µg HeLa eluting over 60 min | 0.1 µg HeLa eluting over 60 min |
|-------------------------------------------------------------|-------------------------------|---------------------------------|
| Faster method (17,500 resolution, 30 ms injection time)     | 67%                           | 34%                             |
| Fast method (17,500 resolution, 60 ms injection time)       | 70%                           | 53%                             |
| Sensitive method (35,000 resolution, 120 ms injection time) | 73%                           | 73%                             |

Every measurement performed in triplicate, average standard deviation < 2%

# Supplementary Table 2B: Number of Peptide Spectrum Matches (PSM)

|                                                             | 1 µg HeLa eluting over 60 min | 0.1 µg HeLa eluting over 60 min |
|-------------------------------------------------------------|-------------------------------|---------------------------------|
| Faster method (17,500 resolution, 30 ms injection time)     | 23728                         | 11243                           |
| Fast method (17,500 resolution, 60 ms injection time)       | 22082                         | 14931                           |
| Sensitive method (35,000 resolution, 120 ms injection time) | 15721                         | 14893                           |

Every measurement performed in triplicate, average standard deviation < 800
