# Supplementary material
Source: publisher figshare collection journal article supplement (https://acs.figshare.com/ndownloader/files/4161244)
Supplement: Supplementary file 1 [file 4161244 › SupplementaryFigure1.pdf]

# Supplementary Figure 1

A

## Properties of Full MS / dd-MS<sup>2</sup> (TopN)

|                                   |                   |
|-----------------------------------|-------------------|
| <b>General</b>                    |                   |
| Runtime                           | 0 to 76 min       |
| Polarity                          | positive          |
| In-source CID                     | 0.0 eV            |
| Default charge state              | 2                 |
| Inclusion                         | —                 |
| Exclusion                         | —                 |
| Tags                              | —                 |
| <b>Full MS</b>                    |                   |
| Microscans                        | 1                 |
| Resolution                        | 70,000            |
| AGC target                        | 1e6               |
| Maximum IT                        | 120 ms            |
| Number of scan ranges             | 1                 |
| Scan range                        | 300 to 1750 m/z   |
| <b>dd-MS<sup>2</sup> / dd-SIM</b> |                   |
| Microscans                        | 1                 |
| Resolution                        | 17,500            |
| AGC target                        | 5e5               |
| Maximum IT                        | 60 ms             |
| Loop count                        | 12                |
| MSX count                         | 1                 |
| TopN                              | 12                |
| Isolation window                  | 1.2 m/z           |
| Fixed first mass                  | 100.0 m/z         |
| NCE                               | 25.0              |
| Stepped NCE                       | —                 |
| <b>dd Settings</b>                |                   |
| Underfill ratio                   | 1.3 %             |
| Intensity threshold               | 1.0e5             |
| Apex trigger                      | —                 |
| Charge exclusion                  | unassigned, 1, >8 |
| Peptide match                     | —                 |
| Exclude isotopes                  | on                |
| Dynamic exclusion                 | 30.0 s            |

B

## Properties of Full MS / dd-MS<sup>2</sup> (TopN)

|                                   |                   |
|-----------------------------------|-------------------|
| <b>General</b>                    |                   |
| Runtime                           | 0 to 76 min       |
| Polarity                          | positive          |
| In-source CID                     | 0.0 eV            |
| Default charge state              | 2                 |
| Inclusion                         | —                 |
| Exclusion                         | —                 |
| Tags                              | —                 |
| <b>Full MS</b>                    |                   |
| Microscans                        | 1                 |
| Resolution                        | 70,000            |
| AGC target                        | 1e6               |
| Maximum IT                        | 120 ms            |
| Number of scan ranges             | 1                 |
| Scan range                        | 300 to 1750 m/z   |
| <b>dd-MS<sup>2</sup> / dd-SIM</b> |                   |
| Microscans                        | 1                 |
| Resolution                        | 35,000            |
| AGC target                        | 5e5               |
| Maximum IT                        | 120 ms            |
| Loop count                        | 12                |
| MSX count                         | 1                 |
| TopN                              | 12                |
| Isolation window                  | 1.2 m/z           |
| Fixed first mass                  | 100.0 m/z         |
| NCE                               | 25.0              |
| Stepped NCE                       | —                 |
| <b>dd Settings</b>                |                   |
| Underfill ratio                   | 2.5 %             |
| Intensity threshold               | 1.0e5             |
| Apex trigger                      | —                 |
| Charge exclusion                  | unassigned, 1, >8 |
| Peptide match                     | —                 |
| Exclude isotopes                  | on                |
| Dynamic exclusion                 | 30.0 s            |

Supplementary Figure 1: Overview of the settings used in the (A) 'fast' and (B) 'sensitive' method. Note the difference in underfill ratio is set to keep the intensity threshold for peak picking to be constant.
