# Supplementary material
Source: publisher figshare collection journal article supplement (https://acs.figshare.com/ndownloader/files/4161244)
Supplement: Supplementary file 1 [file 4161244 › SupplementaryFigure4.pdf]

## Supplementary Figure 4

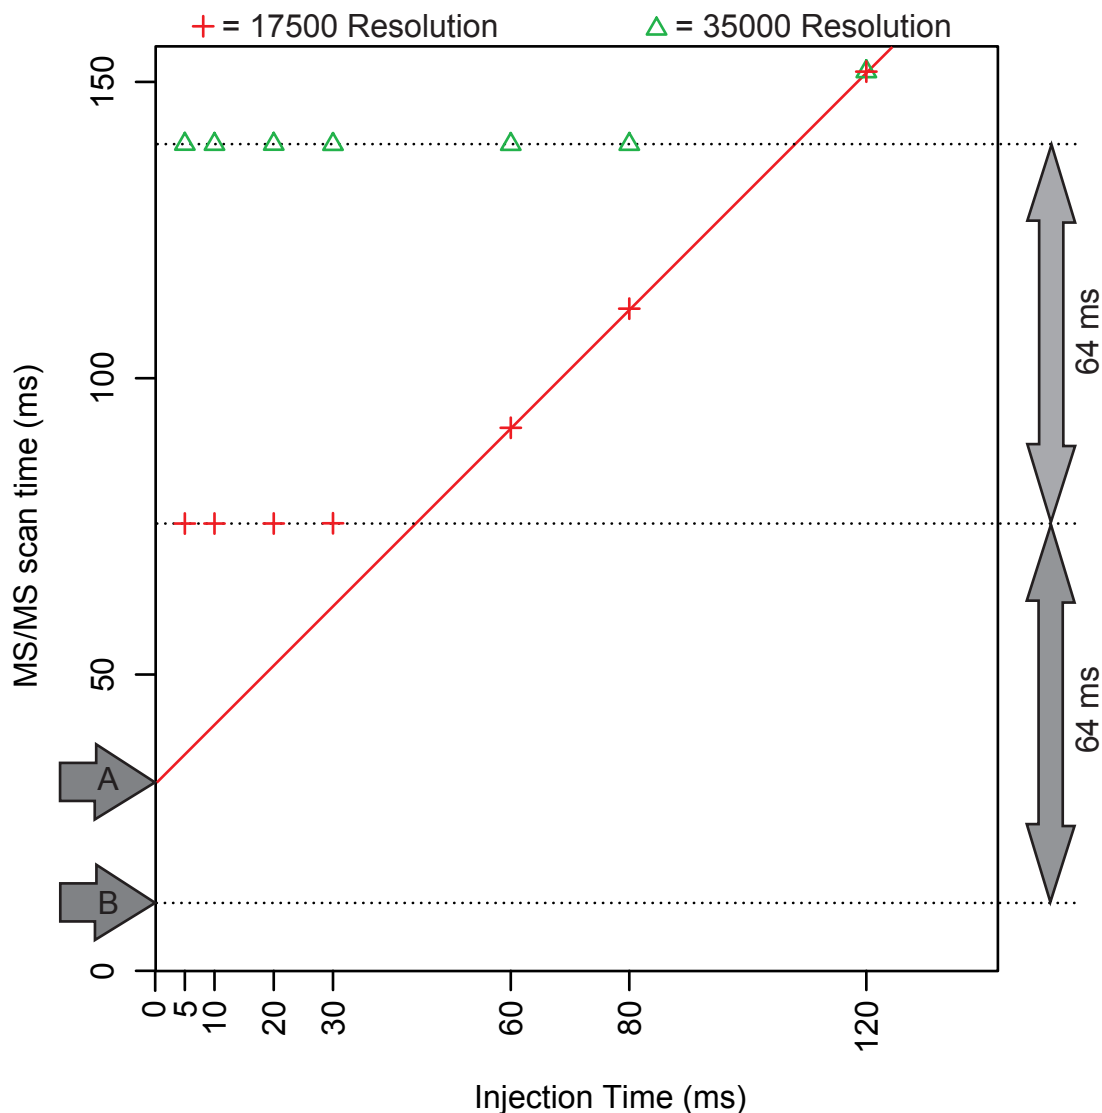

Supplementary Figure 4: Systematic timing experiments. Regression of different top-N methods gave a robust estimate for the MS/MS scan time, which is plotted (triangles and crosses) as a function of injection time and resolution. A linear dependence (approximated by the red line) is observed at higher injection times. Extrapolating the red line to 0 injection time (highlighted by the arrow marked with an A) provides an estimate for the time it takes to accumulate and fragment an ion population. In contrast, no dependence on injection time is observed at lower injection times (horizontal dotted lines). The difference between the two resolutions tested were found to be 64ms. Subtracting 64ms from the 17,500 resolution measurements gives a readout of the overhead between scans in the Orbitrap (indicated by arrow B).
