# Supplementary material
Source: publisher figshare collection journal article supplement (https://acs.figshare.com/ndownloader/files/4161244)

# Supplementary Fig. 5a – 250ng

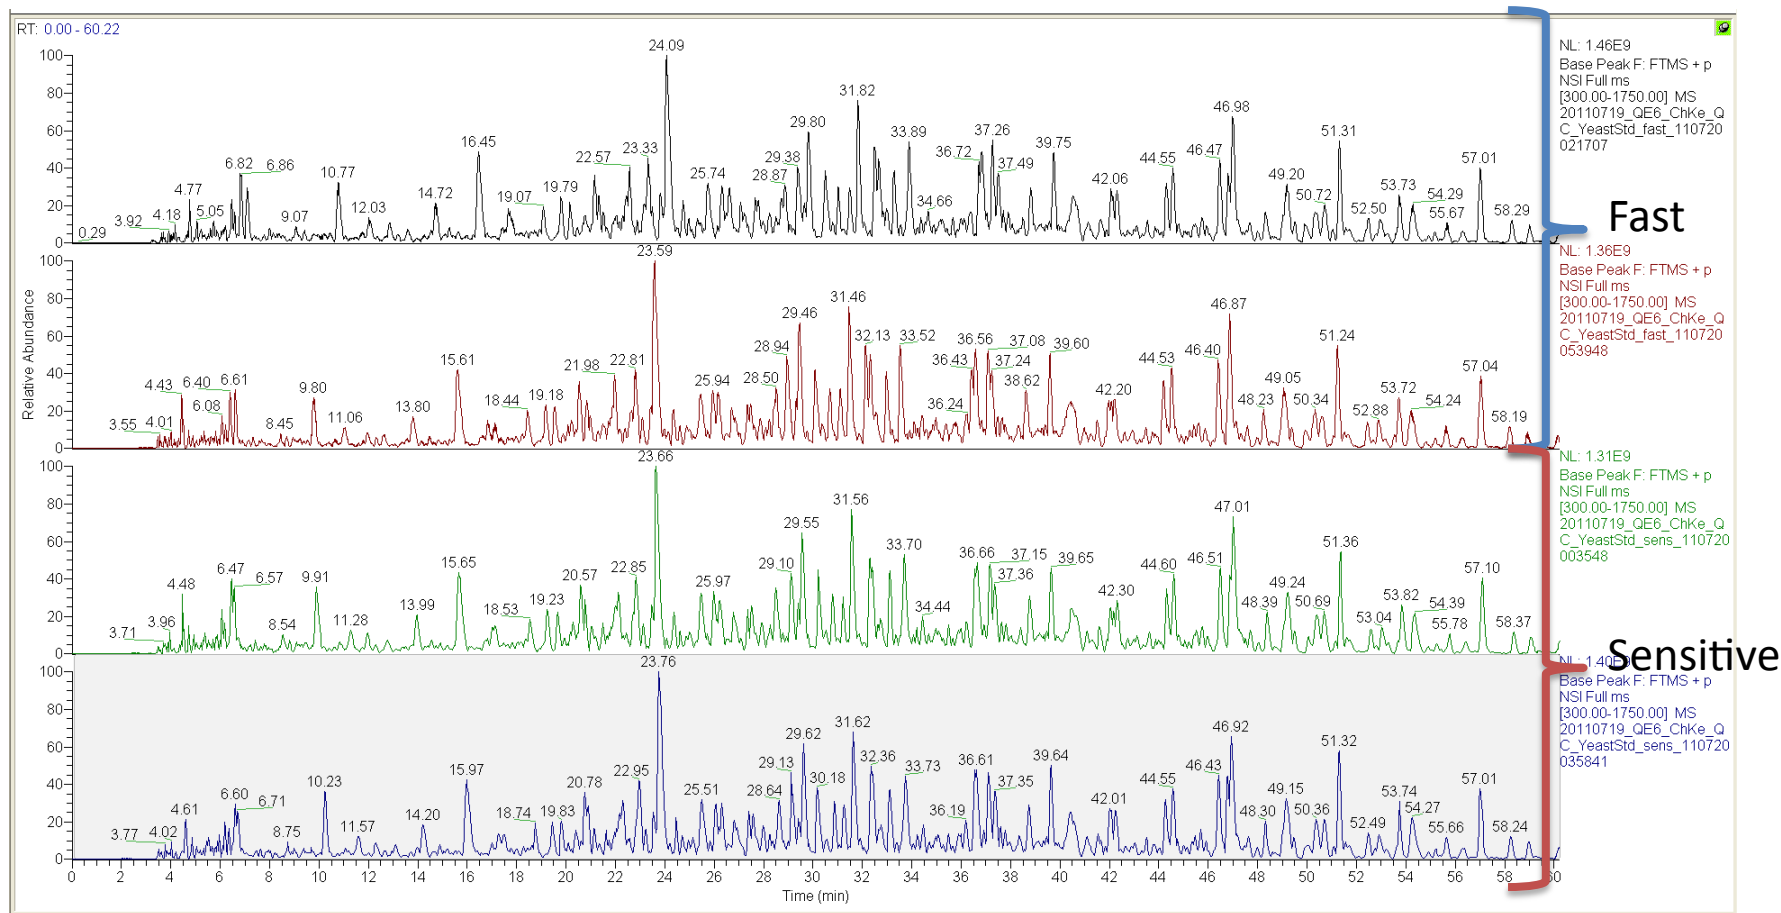

# Supplementary Fig. 5b – 125ng

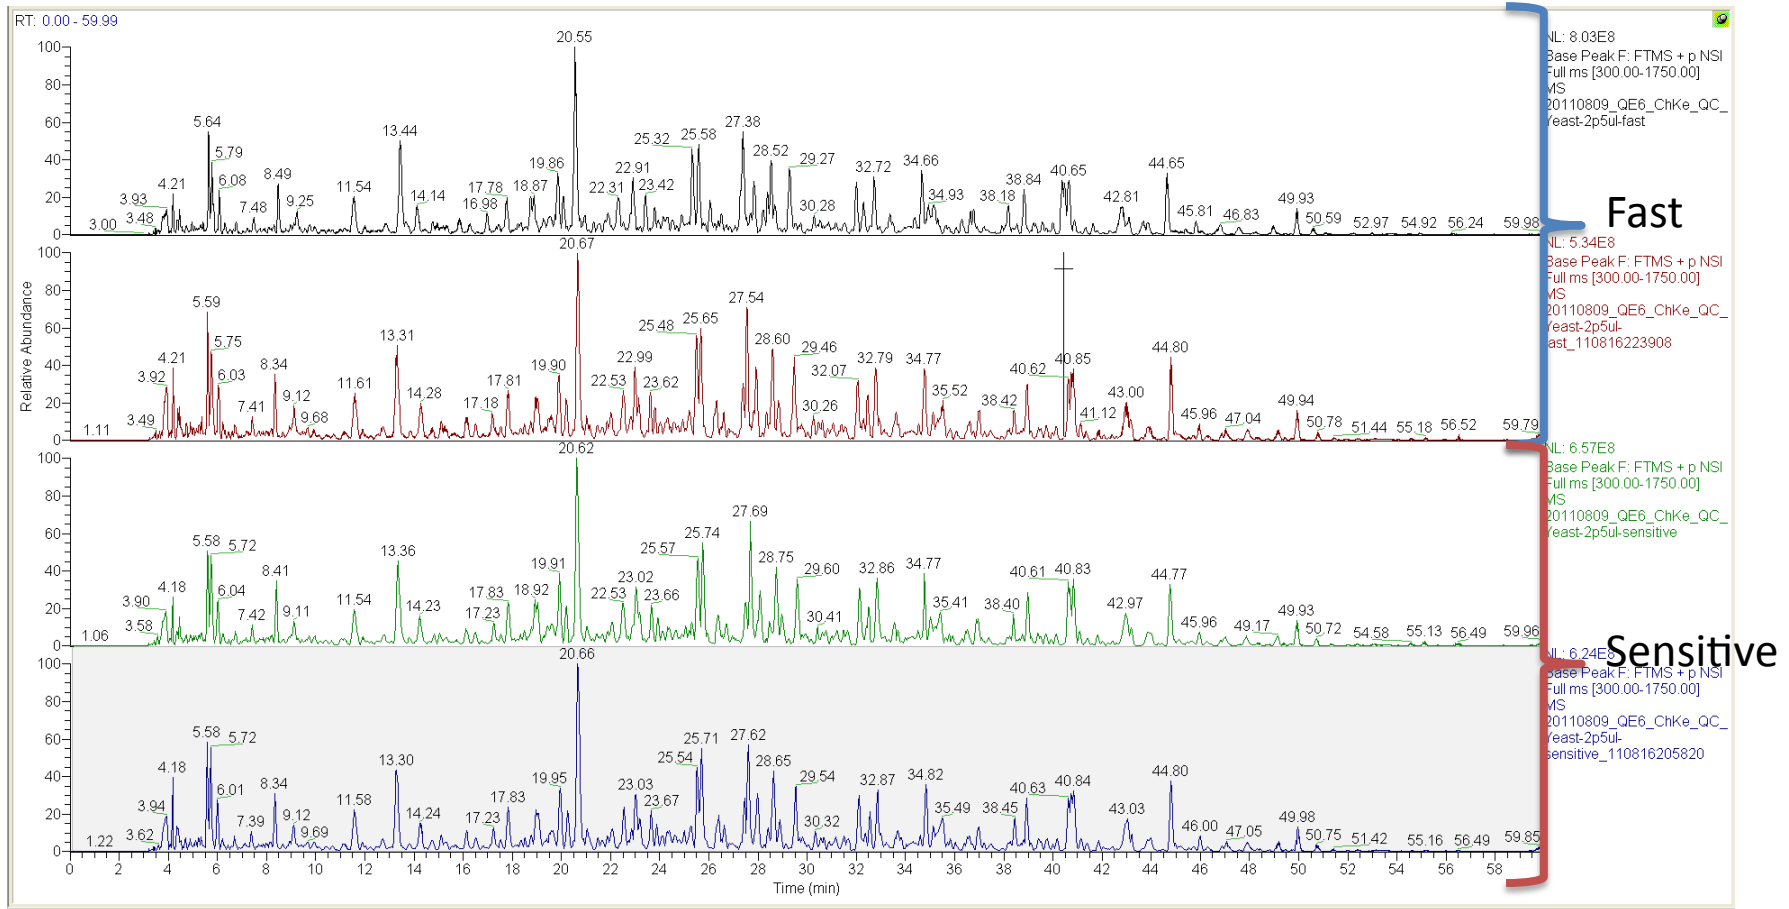

# Supplementary Fig. 5c – 50ng

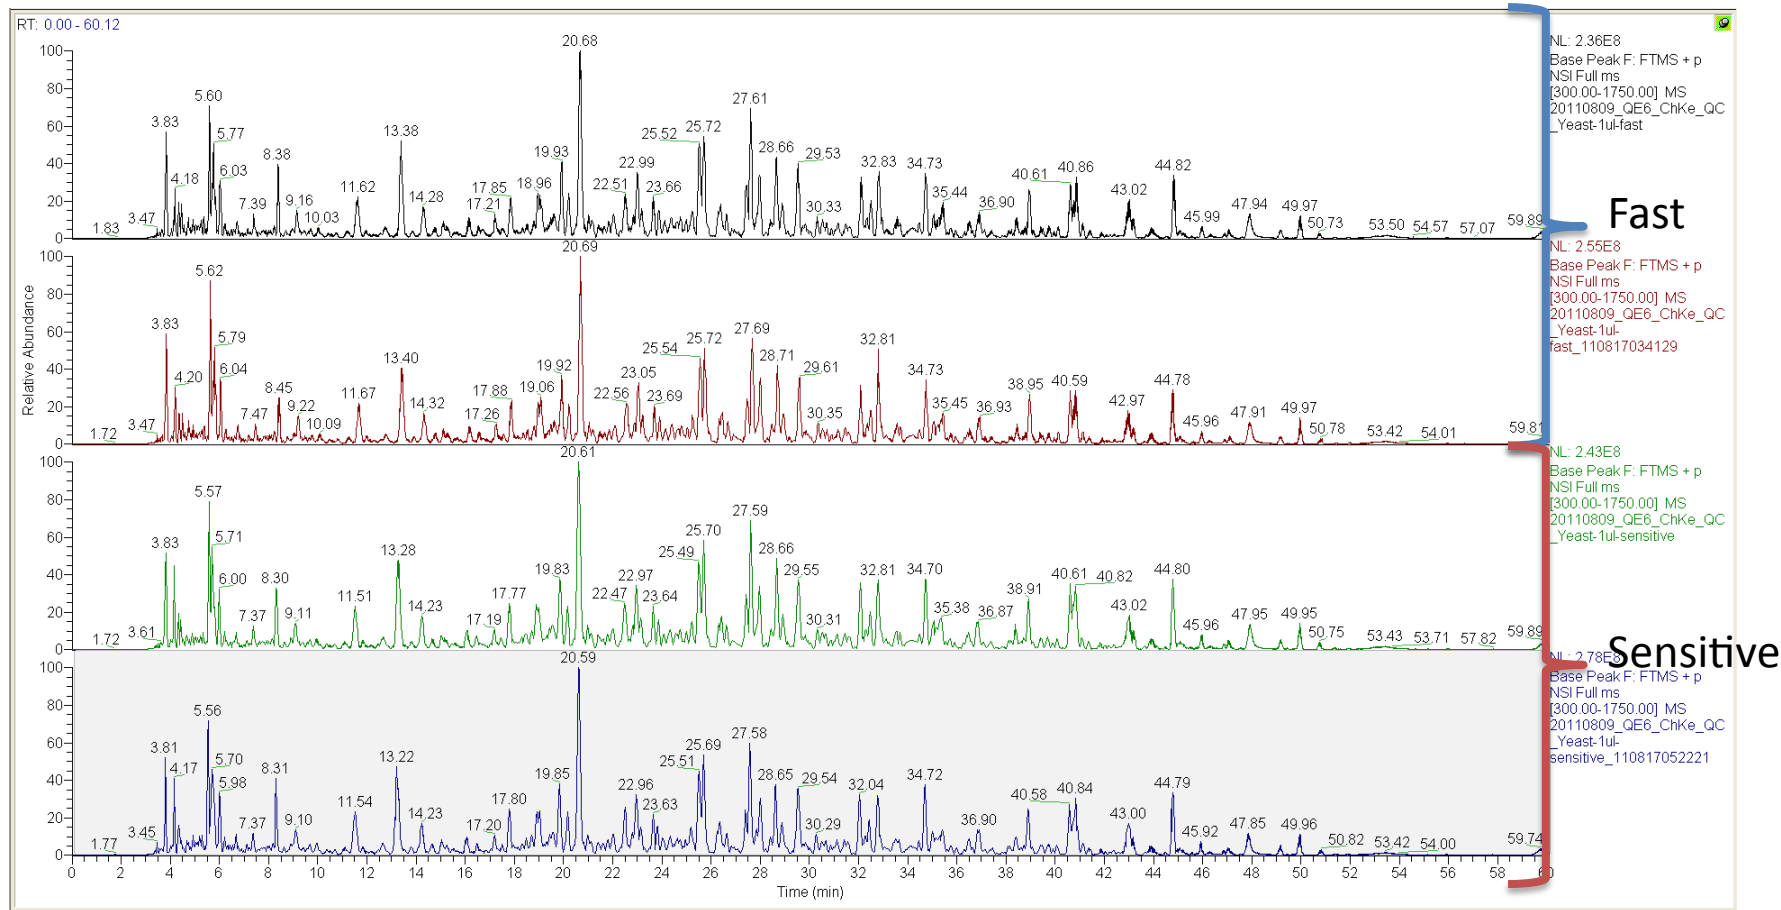

# Supplementary Fig. 5d – 20ng

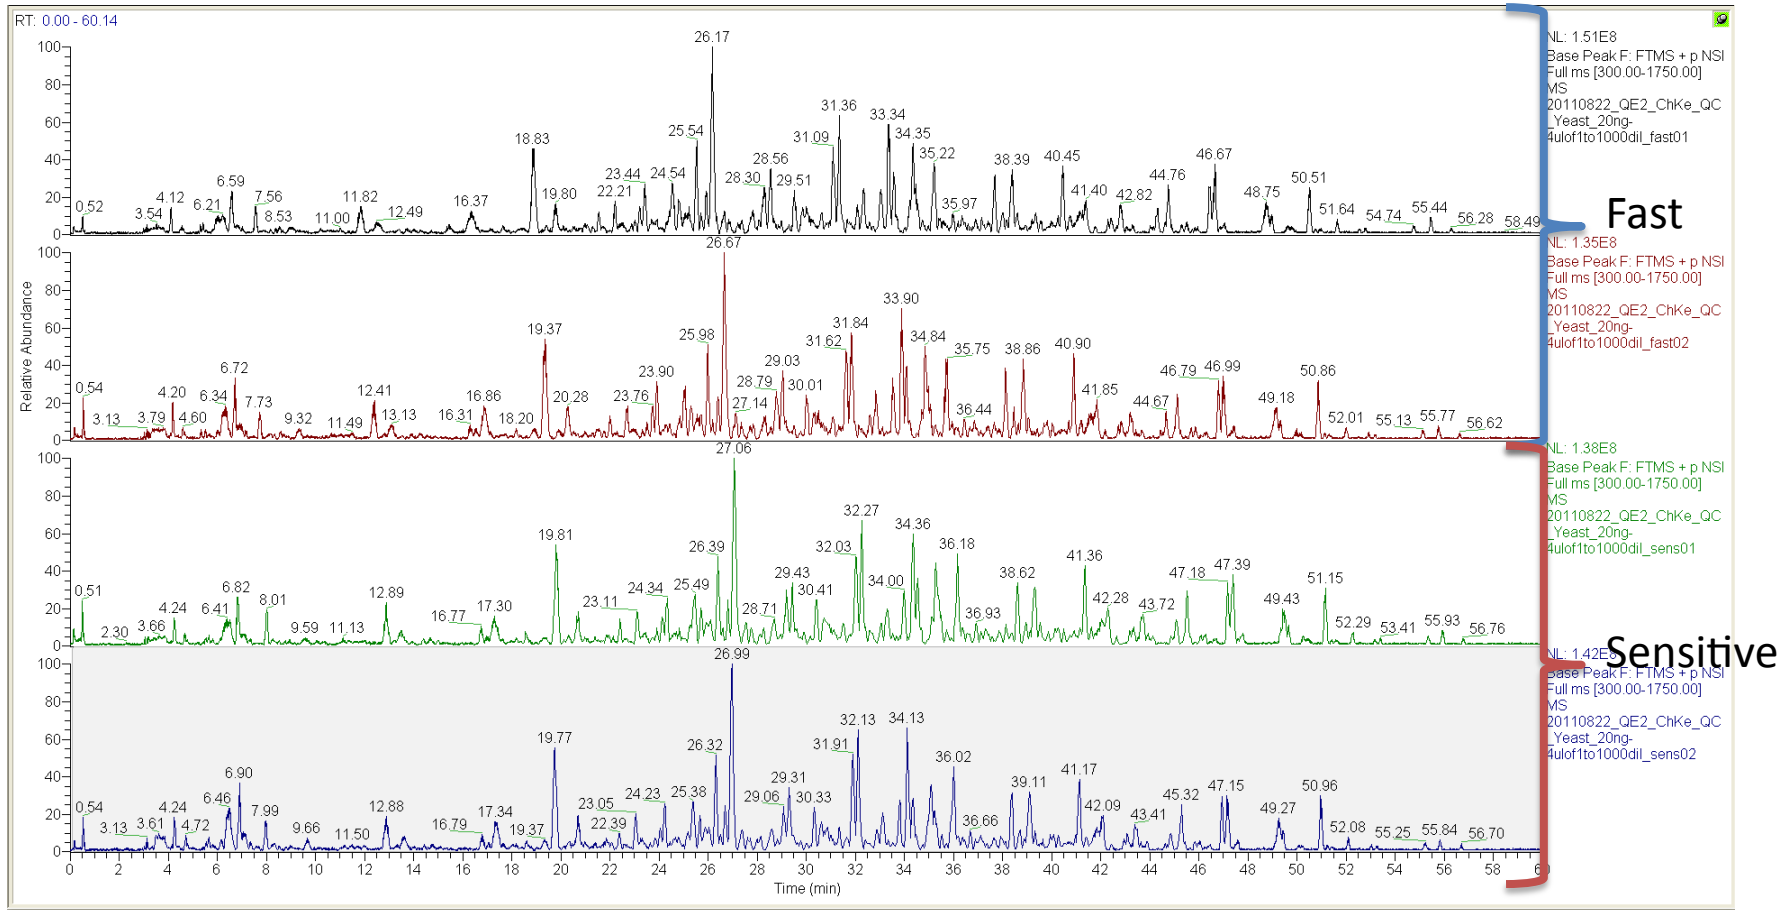

# Supplementary Fig. 5e – 5ng

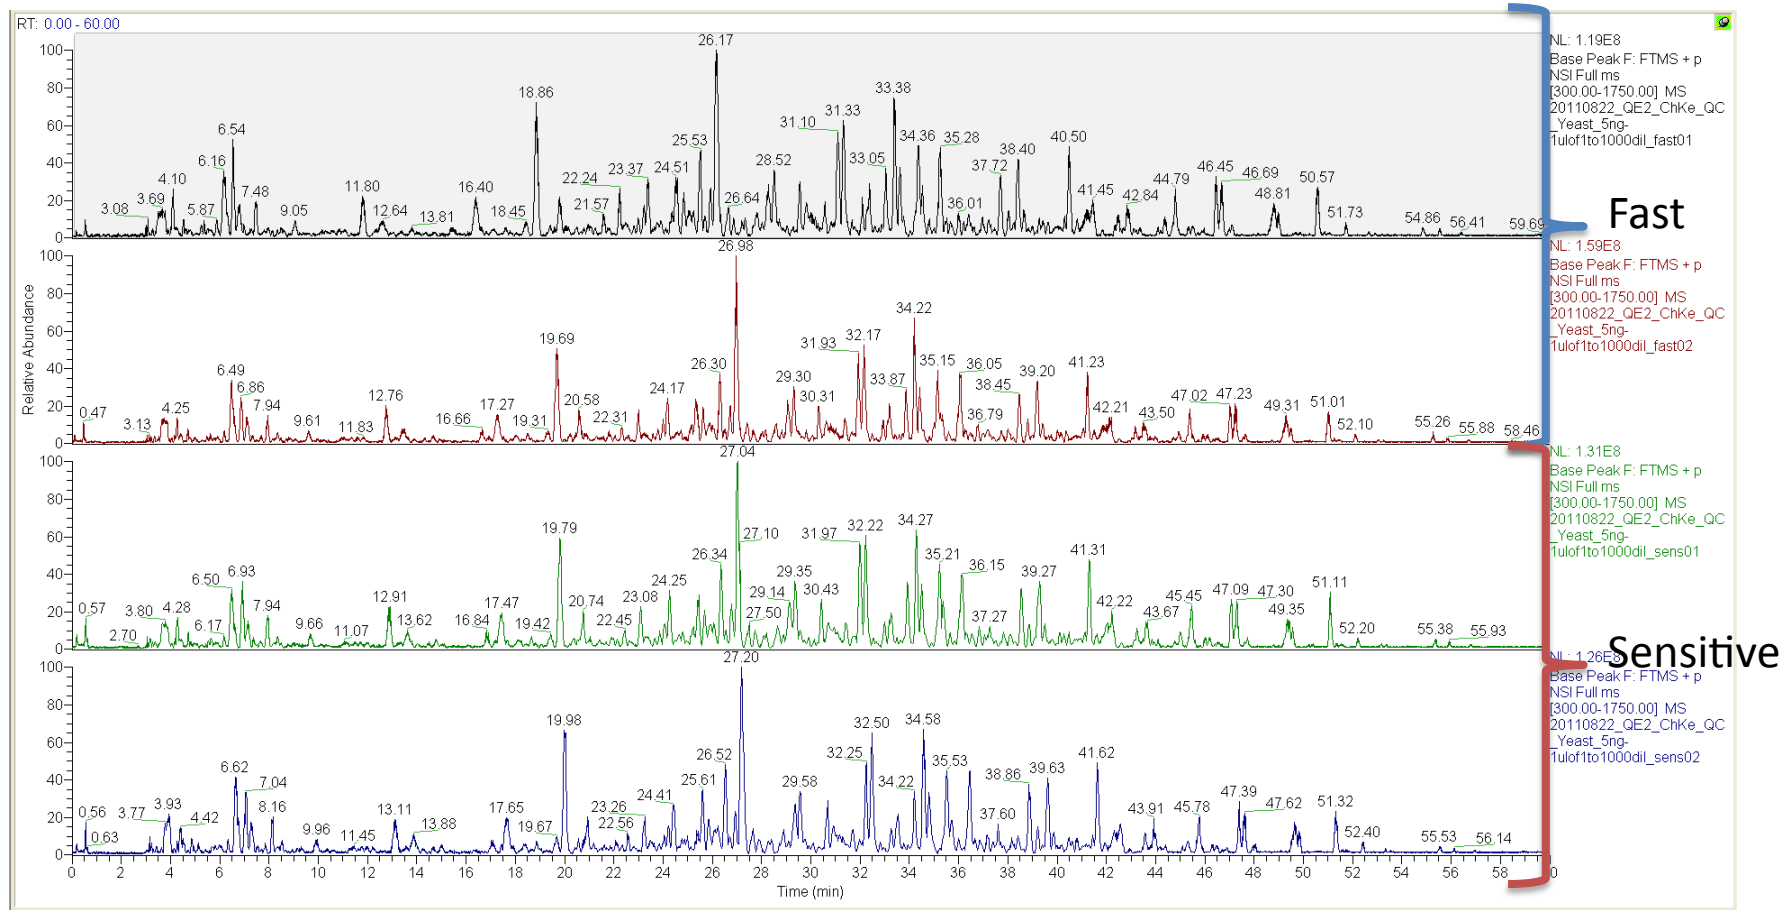

Supplement: Supplementary file 1 [file 4161244 › SupplementaryFigure5.pdf]
