# Supplementary material
Source: publisher figshare collection journal article supplement (https://acs.figshare.com/ndownloader/files/4161244)

# Supplementary Figure 6A:

## XIC from 250ng yeast replica (replica 1-2)

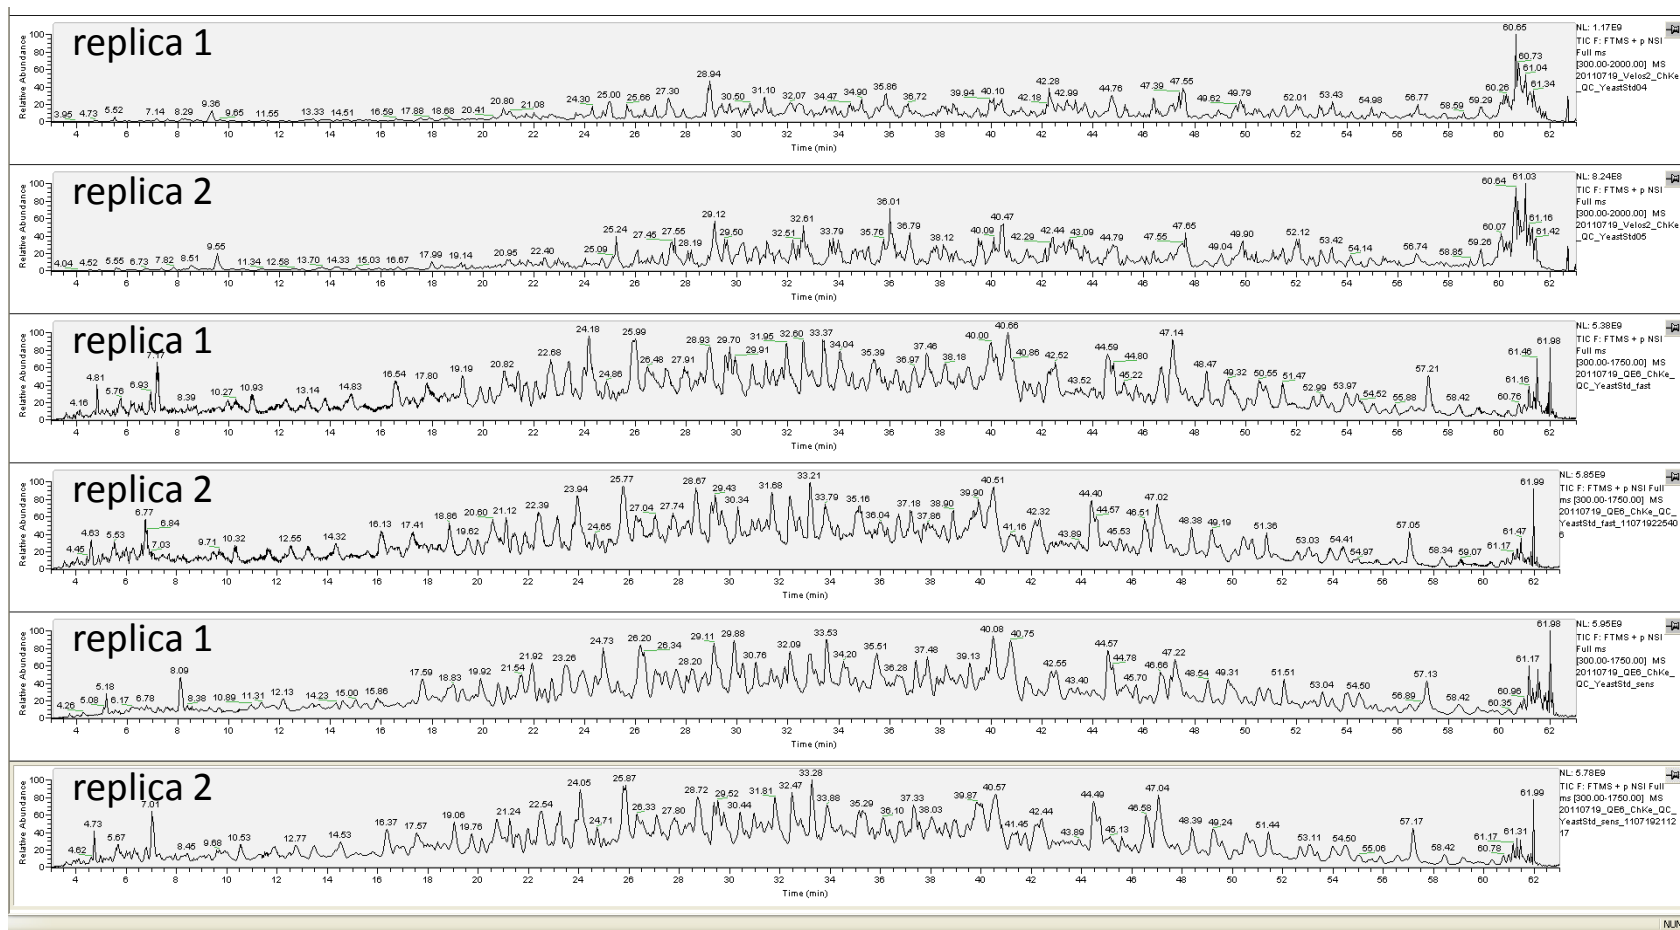

LQ  
Orbitrap  
Velos

Q Exactive  
'fast'

Q Exactive  
'sensitive'

## Supplementary Figure 6B:

XIC from 250ng yeast replica (replica 3-4)

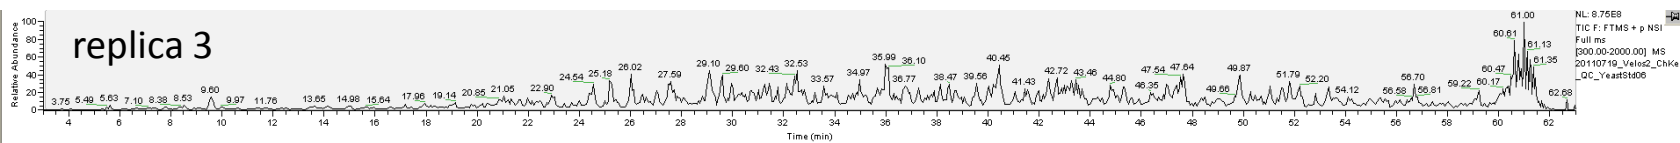

LQ  
Orbitrap  
Velos

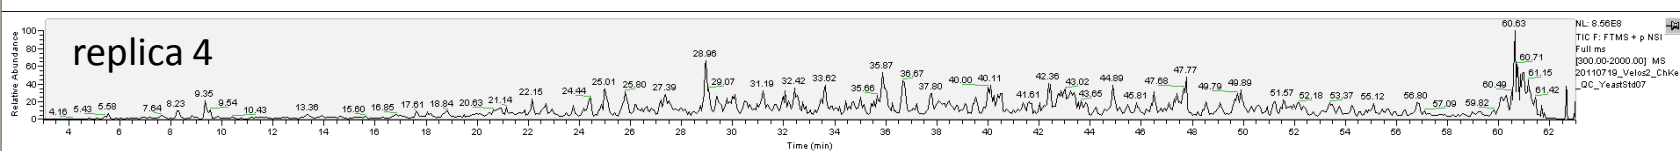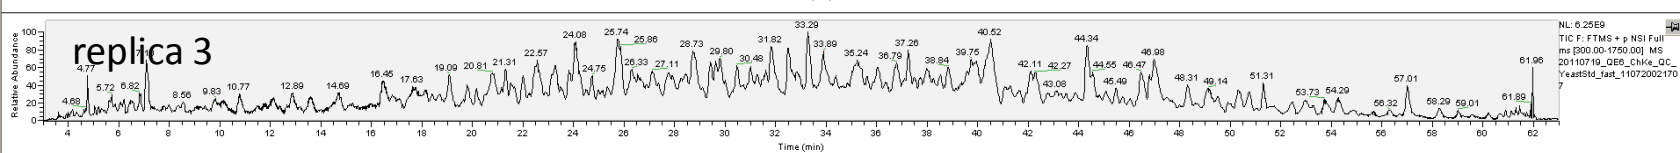

Q Exactive  
- 'fast'

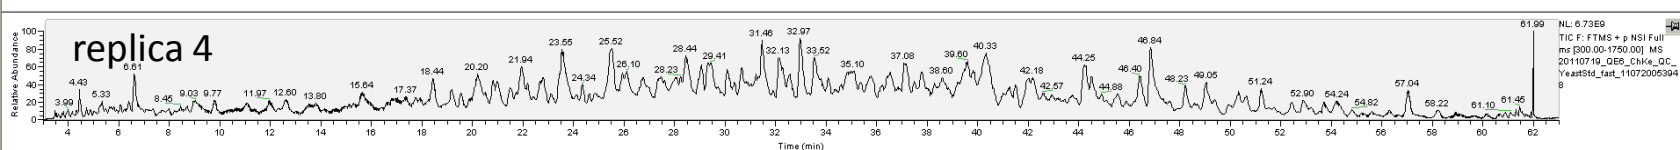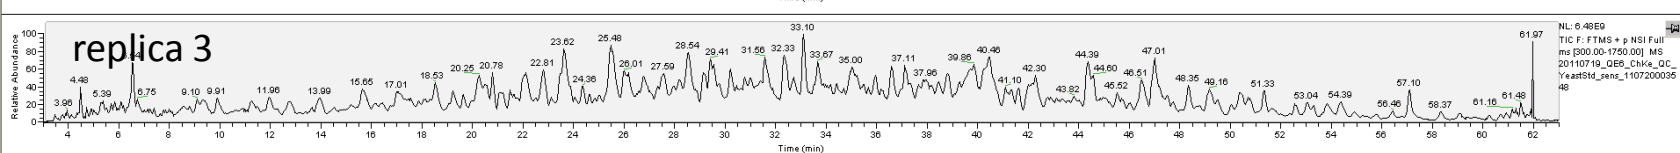

Q Exactive  
'sensitive'

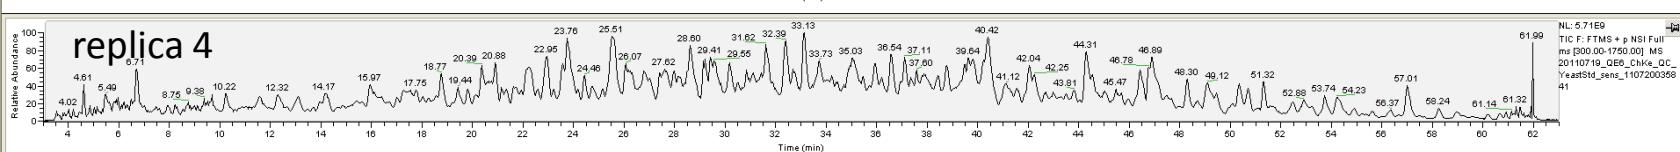

Supplement: Supplementary file 1 [file 4161244 › SupplementaryFigure6.pdf]
