# Supplementary material
Source: publisher figshare collection journal article supplement (https://acs.figshare.com/ndownloader/files/4161244)
Supplement: Supplementary file 1 [file 4161244 › SupplementaryFigure7.pdf]

# Supplementary Figure 7

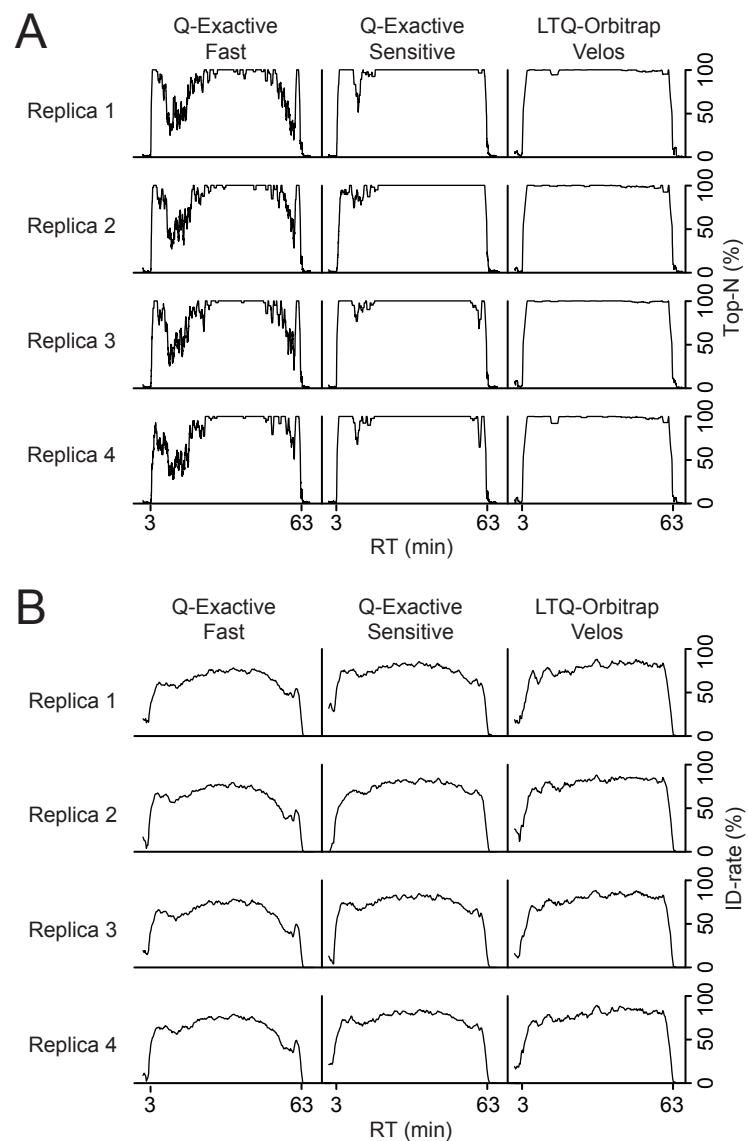

Supplementary Figure 3: Replica of yeast measurements (250ng). (A) The fraction of possible fragment scans are depicted for each method across four replicates throughout the retention time (RT) of each analysis. (B) The identification rate is depicted through the gradient for each method across 4 replica.
